# Supplementary material for: Copolymerization of single-cell nucleic acids into balls of acrylamide gel
Source: PubMed Central journal article supplement (PMC6961581; doi:10.1101/gr.253047.119), 2020-01
Supplement: supp_gr.253047.119_Supplemental_Methods_.pdf [file supp_gr.253047.119_Supplemental_Methods_.pdf]

## Supplemental Method S1

# Single-Cell DNA BAG-seq Laboratory Protocol

### Equipment (similar to Drop-seq/DroNc-seq set-up):

| Name                                                                   | Company                | Catalog Number |
|------------------------------------------------------------------------|------------------------|----------------|
| Inverted Microscope                                                    | Motic                  | AE31           |
| Legato 100 Syringe Pumps (3)                                           | KD Scientific          | 788100         |
| 3 mL Syringes                                                          | Becton Dickinson       | 309657         |
| 10 mL Syringes                                                         | Becton Dickinson       | 302995         |
| PE-2 Tubing                                                            | Scientific Commodities | BB31695-PE/2   |
| 26 Gauge Needles                                                       | Becton Dickinson       | 305111         |
| 22 Gauge Needles                                                       | Becton Dickinson       | 305155         |
| 16 Gauge Needles                                                       | Becton Dickinson       | 305197         |
| PDMS co-flow microfluidic droplet generation device "DroNc-seq device" | Nanoshift, LLC         |                |
| 40 µm cell strainers                                                   | Corning                | 352340         |
| 70 µm cell strainers                                                   | Corning                | 431751         |
| 100 µm cell strainers                                                  | Corning                | 352360         |

### Primers:

| Name                        | Sequence                                                                                     |
|-----------------------------|----------------------------------------------------------------------------------------------|
| Linker TG                   | /5ACryd//iSp18/TGTGTTGGGTGTGTTTGGKKKKKKKGGKKKKKKKKNN                                         |
| Adapter1-BC1-vt-#DNAx       | ACGCAGAGTCCGCTC <barcode1> NNNN CA+T+G (detailed sequences at bottom)                        |
| Adapter2-BC2-Adapter1-#DNAx | GTCTCGTGGGCTCGGAGATGTGTATAAGAGACAG <barcode2> ACGCAGAGTCCGCTC (detailed sequences at bottom) |
| TG primer                   | TGTGTTGGGTGTGTTT*G*G                                                                         |
| P5-TG                       | AATGATACGGCGACCACCGAGATCTACAC GGAGATGTG<br>TGTGTTGGGTGTGTTT*G*G                              |
| Read1-TG                    | GGAGATGTG TGTGTTGGGTGTGTTTGG                                                                 |

### Chemical Reagents:

| Name                                                              | Company                  | Catalog Number |
|-------------------------------------------------------------------|--------------------------|----------------|
| <b>Nuclei Preparation</b>                                         |                          |                |
| Nuclei PURE lysis buffer (only for nuclei prep from tumor sample) | Sigma-Aldrich            | NUC201-1KT     |
| Nuclei EZ lysis buffer                                            | Sigma-Aldrich            | NUC101-1KT     |
| 10X PBS                                                           | Thermo Fisher Scientific | AM9624         |
| UltraPure BSA                                                     | Thermo Fisher Scientific | AM2618         |
| Trypsin-EDTA(0.25%, phenol red)                                   | Thermo Fisher Scientific | 25200056       |
| <b>Aqueous Phase 2</b>                                            |                          |                |
| Acrylamide/bis-acrylamide, 40% solution                           | Sigma-Aldrich            | A9926          |
| Acrylamide solution, 40%                                          | Sigma-Aldrich            | A4058          |
| 0.5 M EDTA                                                        | Thermo Fisher Scientific | AM9260G        |
| 20% Sarkosyl                                                      | Sigma-Aldrich            | L7414          |

|                                           |                          |                         |
|-------------------------------------------|--------------------------|-------------------------|
| 0.1M DTT                                  | Thermo Fisher Scientific | 707265ML                |
| Ammonium persulfate                       | Sigma-Aldrich            | 09913-100G              |
| 10% NP-40                                 | Thermo Fisher Scientific | 28324                   |
| Proteinase K                              | Sigma-Aldrich            | P4850                   |
| <b>Oil Phase</b>                          |                          |                         |
| HFE-7500                                  | Oakwood Chemical         | 051243                  |
| FC-40                                     | Sigma-Aldrich            | F9755                   |
| 008-Fluorosurfactant                      | Ran Technologies         | 008-FluoroSurfactant-5G |
| TEMED                                     | Bio-Rad                  | 1610801                 |
| <b>Post-Droplet Generation</b>            |                          |                         |
| Mineral Oil                               | Sigma-Aldrich            | 69794-500ML             |
| 20X SSC                                   | Thermo Fisher Scientific | 15557044                |
| Perfluorooctanol (PFO)                    | Sigma-Aldrich            | 370533                  |
| 10 mM dNTP                                | Sigma-Aldrich            | 11814362001             |
| DNA Polymerase I, Large (Klenow) Fragment | New England BioLabs      | M0210M                  |
| Exonuclease I                             | New England BioLabs      | M0293                   |
| NIaIII                                    | New England BioLabs      | R0125L                  |
| Klenow Fragment (3-5' exo minus)          | New England BioLabs      | M0212L                  |
| Quick Ligase                              | New England BioLabs      | M2200                   |
| KAPA HiFi HotStart ReadyMix               | Roche                    | KK2602                  |
| Agencourt AMPure XP beads                 | Beckman Coulter          | A63880                  |
| Nextera XT DNA Library Prep Kit           | Illumina                 | FC-131-1024             |

## Chemical Solutions to Prepare

PBS-BSA (1X PBS, 0.05% BSA)

20% Surfactant in HFE-7500

20% Surfactant in FC-40

10% Ammonium persulfate

6X SSC

TE-SDS (10 mM Tris pH 8.0, 1 mM EDTA, 0.5% SDS)

STOP-25 (10 mM Tris pH 8.0, 25 mM EDTA, 0.1% Tween-20, 0.1 M KCl)

STOP-10 (10 mM Tris pH 8.0, 10 mM EDTA, 0.1% Tween-20, 0.1 M KCl)

STOP-1 (10 mM Tris pH 8.0, 1 mM EDTA, 0.1% Tween-20, 0.1 M KCl)

HBW (10 mM Tris pH 8.0, 1 mM EDTA, 0.1% Tween-20)

# scDNA BAG-seq Experiment:

## Nuclei Preparation from Tumor Sample

1. Keep reagents on ice and tumor sample on dry ice. Set centrifuge temperature to 4°C.
2. Use scalpels to mince sample on a sterile plate. Add 500 µL of Nuclei PURE lysis buffer onto the sample.
3. Transfer sample using pipette from plate to a glass tissue grinder. Use pestles to further mince the sample while keeping the grinder on ice.
4. Add 3.5 mL of EZ lysis buffer, then transfer all to a 15 mL conical. Pipet up and down.
5. Once in 15 mL conical tube, keep on ice for 5 minutes.
6. Centrifuge the conical tube at 500 rcf for 5 minutes at 4°C, then discard supernatant. Re-suspend the pellet in 700 µL of EZ lysis buffer. Pipet up and down, and gently vortex.
7. Add 3.3 ml of EZ buffer and pipet up and down. Wait 5 minutes. Gently vortex. Spin down using the same settings, then discard supernatant.
8. Add 600 µL of PBS-BSA, pipet up and down, pass through a 70 µm filter, and count nuclei.
9. Use PBS-BSA to create a final dilution of 2.5E5 nuclei in 1 mL volume.

## Nuclei Preparation from Cell Culture

1. Follow standard cell harvest protocol to harvest cells from plates. Collect cell solution in a 15 mL conical and spin down at 500 rcf for 5 minutes.
2. Discard supernatant, then re-suspend pellet in 8 mL of 1x PBS. Spin once more using same settings, and aspirate supernatant.
3. Add 4 ml of EZ lysis buffer into pellet, pipet up and down, and wait 5 minutes. Lightly vortex, spin down again, and discard supernatant
4. Add 700 µL of EZ lysis buffer to break pellet, pipet up and down, lightly vortex. Then add 3.3 mL of EZ lysis buffer, pipet up and down, and keep on ice for 5 minutes. Lightly vortex, spin down, and discard supernatant.
5. Add 1.5 mL of PBS-BSA. Pass through a 40 µm filter, and count.
6. If preparing a 1:1 mix of the two cell types, use PBS-BSA to create a final dilution of 2.5E5 cells in 1 mL.

## Oil Phase Preparation

1. Combine the following; vortex to mix (*enough for 2 samples*):
  - 600 µL 20% surfactant
  - 9.6 µL TEMED
  - 1.8 mL HFE7500

## Aqueous Phase 2 Preparation

1. Combine the following; pipet to mix (*enough for 2 samples*):

| Aqueous Phase 2 Solution | Volume (µL) | Final Concentration |
|--------------------------|-------------|---------------------|
| AA/bis-acrylamide, 40%   | 180         |                     |
| Acrylamide solution, 40% | 129         |                     |
| H <sub>2</sub> O         | 271         |                     |
| 500 µM Linker TG primer  | 160         | 40 µM               |
| 0.5M EDTA                | 50          | 12.5 mM             |
| 1M Tris pH 7.5           | 100         | 50 mM               |
| 20 % Sarkosyl            | 10          | 0.1%                |

|              |             |      |
|--------------|-------------|------|
| Proteinase K | 20          |      |
| 0.1M DTT     | 20          | 1 mM |
| 10% APS      | 60          | 0.3% |
| <b>Total</b> | <b>1 mL</b> |      |

## Microfluidics Setup & Oil Droplet Collection

- Turn on microscope. Place microfluidic device on microscope stage.
- Insert a piece of PE/2 tubing into the output well and place the other end into a waste container (15 mL conical tube).
- Use the following syringes to collect the three solutions.
  - Oil Phase:** Use a 10 mL syringe with a 16 G needle to aspirate solution into syringe.
  - Cell Solution or Aqueous Phase 2:** Use a 3 mL syringe and a 22 G needle to aspirate solution into syringe.
- For each syringe, change the needle to a 26 G needle and insert into PE/2 tubing.
- Place syringes into their designated syringe pumps and insert tubing into the corresponding wells of the microfluidics chamber
  - From left to right: Oil – Aqueous 2 – Cell Solution (Aqueous 1) – Output
- Once all syringes and tubing are in place, set the following flow rates:
  - Oil Phase:** 3,000  $\mu\text{L/hr}$
  - Cell Solution:** 750  $\mu\text{L/hr}$
  - Aqueous Phase 2:** 750  $\mu\text{L/hr}$
- Begin by first turning on the cell solution pump.
- Once cell solution is flowing, turn on the aqueous phase 2 pump.
- Once the interphase between cell solution and aqueous phase two has stabilized, turn on the oil phase pump and wait for the droplet formation to stabilize.
- Once the flow has stabilized, place the output tubing on a glass slide under the microscope to assess the size uniformity of oil droplets.
- Once droplet size is uniform, collect droplets in 300  $\mu\text{L}$  of mineral oil in 1.5 mL tubes.
- After collection, incubate BAGs at 50°C overnight.

## Oil Change and Incubation

- Discard bottom layer of the tube using 22 G needle. Add 300  $\mu\text{L}$  of FC-40 oil with 5% surfactant into the bottom of the tube.
- Incubate at 95°C for 12 minutes to denature genomic DNA.
- Incubate at 55°C for 1 hour, then incubate at room temperature for at least 10 minutes.

## Droplet Breakage

- Remove mineral oil in top layer using pipet. Remove mineral oil in bottom layer using a 3 mL syringe and 22G needle.
- Add 600  $\mu\text{L}$  6X SSC buffer and 150  $\mu\text{L}$  perfluorooctanol (PFO) in a fume hood. Shake the tube by hand to break the droplets and release balls of acrylamide gel (BAGs).
- Centrifuge 1000 rcf for 1.5 minutes.
- Discard the top and bottom layer, leaving the translucent BAG layer in the tube.
- Add 600  $\mu\text{L}$  6x SSC and shake tube multiple times. Centrifuge 1000 rcf for 1.5 minutes. Discard the top layer and any visible PFO from the bottom of the tube.

## Linear Extension

1. Wash BAG layer using 1X NEB2 buffer. Pipet to mix. Centrifuge 1000 rcf for 1.5 minutes, discard the supernatant.
2. Prepare the following linear extension solution; pipet up and down to mix:

| Linear Extension Solution                 | Volume ( $\mu\text{L}$ ) |
|-------------------------------------------|--------------------------|
| H <sub>2</sub> O                          | 830                      |
| NEB2 buffer                               | 100                      |
| dNTP                                      | 60                       |
| DNA Polymerase I, Large (Klenow) Fragment | 10                       |
| <b>Total</b>                              | <b>1 mL</b>              |

3. Transfer linear extension solution to BAG layer. Pipet up and down ~10x to mix.
4. Incubate at room temperature for 1.5 hours with rotation.
5. Incubate at 37°C for 30 minutes with rotation.
6. Stop the reaction with the following steps:
  - a. Add 1:1 ratio of STOP-25 buffer. Mix by pipetting.
  - b. Centrifuge at 1000 rcf for 1 minute. Discard supernatant.
  - c. Add ~500  $\mu\text{L}$  of STOP-25 buffer to each tube. Combine contents into one tube.
  - d. Centrifuge at 1000 rcf for 1 minute. Discard supernatant.
  - e. Add 1 mL of STOP-10 buffer, mix, and pass solution through 100  $\mu\text{m}$  cell strainer, and transfer the solution to a new 1.5 mL Eppendorf tube.
  - f. Continue to exonuclease treatment or re-suspend in 800  $\mu\text{L}$  STOP-10 and store at 4°C.

-----Safe Stopping Point: Store BAGs in STOP-10 at 4°C overnight-----

## Exonuclease Treatment

1. If stored in STOP-10, centrifuge 1000 rcf for 1.5 minutes and discard the supernatant.
2. Wash once with STOP-1.
3. Wash once with 1x Exo I buffer. Discard supernatant.
4. Prepare the following exonuclease treatment solution and vortex.

| Exonuclease Treatment Solution | Volume ( $\mu\text{L}$ )            |
|--------------------------------|-------------------------------------|
| H <sub>2</sub> O               | 680                                 |
| 10x Exo I buffer               | 80                                  |
| Exo I enzyme                   | 40                                  |
| <b>Total</b>                   | <b>800 <math>\mu\text{L}</math></b> |

5. Transfer 800  $\mu\text{L}$  Exonuclease Treatment Solution to the tube of BAGs; pipet to mix.
6. Incubate 37°C with rotation for 1 hour.
7. Centrifuge at 1000 rcf for 1 minute. Discard supernatant.
8. Stop the reaction with the following washes:
  - a. STOP-25 twice
  - b. STOP-10 once.
9. Continue to NlaIII cutting or re-suspend in 800  $\mu\text{L}$  STOP-10 and store at 4°C.

-----Safe Stopping Point: Store BAGs in STOP-10 at 4°C overnight-----

## NlaIII cutting

1. If stored in STOP-10, centrifuge 1000 rcf for 1.5 minutes and discard the supernatant.
2. Wash once with STOP-1.

3. Wash once with 1x CutSmart buffer.
4. Prepare the following NlaIII solution 1 and vortex.

| <b>NlaIII Solution 1</b> | <b>Volume (µL)</b> |
|--------------------------|--------------------|
| H <sub>2</sub> O         | 840                |
| 10x CutSmart buffer      | 100                |
| NlaIII enzyme            | 60                 |
| <b>Total</b>             | <b>1 mL</b>        |

5. Transfer NlaIII Solution 1 to the tube of BAGs; pipet to mix.
6. Incubate 37°C with rotation for 1.5 hours.
7. Centrifuge at 1000 rcf for 1.5 minutes. Discard supernatant
8. Prepare the following NlaIII solution 2 and vortex.

| <b>NlaIII Solution 2</b> | <b>Volume (µL)</b> |
|--------------------------|--------------------|
| H <sub>2</sub> O         | 880                |
| CutSmart buffer          | 100                |
| NlaIII enzyme            | 20                 |
| <b>Total</b>             | <b>1 mL</b>        |

9. Transfer NlaIII Solution 2 to the tube of BAGs; pipet to mix.
10. Incubate 37°C with rotation for 1 hour.
11. Centrifuge at 1000 rcf for 1.5 minutes. Discard supernatant.
12. Stop the reaction with the following washes:
  - a. STOP-25 twice
  - b. STOP-10 once.
13. Continue to First split-pool or re-suspend in 800 µL STOP-10 and store at 4°C.

-----Safe Stopping Point: Store BAGs in STOP-10 at 4°C overnight-----

## First Split-Pool

1. Preparation:
  - a. If stored in STOP-10 overnight, centrifuge 1000 rcf for 1.5 minutes. Discard supernatant.
  - b. Wash once with HBW buffer. Discard supernatant.
2. Prepare the following hybridization master mix and vortex.

| <b>Hybridization Master Mix</b> | <b>Volume (µL)</b> |
|---------------------------------|--------------------|
| H <sub>2</sub> O                | 400                |
| 2x Quick Ligase Buffer          | 700                |
| dNTP                            | 100                |
| <b>Total</b>                    | <b>1200 µL</b>     |

- a. Transfer Hybridization Master Mix into BAG tube (assuming there is 100 µL of BAG pellet in HBW buffer). Pipet to mix.
- b. Quickly add 162.5 µL into each tube of one PCR strip. Use multipipette to transfer 13 µl of this solution to each tube in a 96-well PCR plate.
- c. Add 1 µL of 100 uM “Adapter1-BC1-vt-#DNax” primers into each corresponding well. Each well should have a unique well-specific primer. Briefly spin down, and invert plate.
- d. Incubate at room temperature for 4 minutes in inverted position.
- e. Incubate at 50°C for 5 minutes in thermocycler with heated lid.

- f. Transfer plates directly to cold racks in 4°C.
  - g. Keep inverted at 4°C for 10 minutes, then another 10 minutes with rotation. Follow these steps for hybridization:
3. On ice, prepare the following Extension Master Mix; vortex to mix.

| Extension Master Mix   | Volume (µL) |
|------------------------|-------------|
| H <sub>2</sub> O       | 200         |
| 2X Quick Ligase Buffer | 250         |
| Klenow 3-5 exo minus   | 75          |
| Quick Ligase enzyme    | 75          |
| <b>Total</b>           | <b>600</b>  |

- h. Transfer 75 µL of Extension Master Mix into each tube of one PCR strip
- i. Put the plate on cold rack, and using multipipette add 6 µL of Extension Master Mix to each tube in BAG plate. Pipet up and down ~10x
- j. Transfer plates to thermocycler with the following conditions:

| Gel Extension Program:                      |
|---------------------------------------------|
| 10°C 30 minutes                             |
| 22°C 10 minutes (ramp rate 0.2°C / second ) |

- k. Incubate at room temperature with rotation for 40 minutes.
  - l. Incubate 37°C with rotation for 40 minutes.
4. Stop the reaction with the following:
- a. Add 100 µL STOP-25 to each well of the plate. Centrifuge plates 1000 rcf for 2 minutes at room temperature.
  - b. Without disturbing the BAG pellet, discard 85 µL from **the top** of each tube.
  - a. Add 5 mL STOP-25 into solution basin. Transfer the remaining BAG solutions from the plate into the solution basin (35 µL per tube).
  - b. Transfer BAG solution from solution basin into a 15 mL conical tube. Centrifuge 200 rcf for 4 minutes. Discard supernatant.
  - c. Add 800 µL STOP-25, pipet up and down, and transfer BAG solution into a 1.5 mL tube. Centrifuge 1000 rcf for 1.5 minutes. Discard supernatant. Re-suspend in 800 µL STOP-10 buffer.

-----Safe Stopping Point: Store BAGs in STOP-10 at 4°C overnight-----

## Second Split-Pool

1. Preparation:
  - a. Thaw “TG primer” and “Adapter2-BC2-Adapter1-#DNAx” barcode primers.
  - b. Take out BAGs from 4°C, discard supernatant, and perform one STOP-10 wash. Discard supernatant. Re-suspend BAGs in 500 µL HBW.
2. Use a microscope to count the number of BAGs per µL.
3. Create the following TG primer/BAG mix:

| TG primer/BAG mix | Volume (µL)    |
|-------------------|----------------|
| 10 µM “TG primer” | 100            |
| BAGs in HBW       | <i>x</i>       |
| H <sub>2</sub> O  | 764 – <i>x</i> |
| <b>Total</b>      | <b>864 µL</b>  |

- a. Transfer 108 µL of TG primer/BAG mix into each tube of one PCR strip. Use multipipette to transfer 9 µL of mix into each tube of 96-well plate.

4. Add 1  $\mu\text{L}$  of 96 different 10  $\mu\text{M}$  "Adapter2-BC2-Adapter1-#DNAx" primers into each corresponding well. Each well should have a unique primer. Briefly spin.
5. On ice, add 10  $\mu\text{L}$  of Ultra II Q5 Master Mix to each tube of 96-well plate. Pipet to mix.
6. Proceed to PCR:

**Q5 Gel PCR program:**

95°C 2 min  
 98°C 15 s  
**12 cycles of:**  
 98°C 15 s  
 63°C 1 min  
 65°C 1 min  
**Then:**  
 65°C 5 min  
 4°C infinite

7. Purify sample twice with AMPure XP beads using the following guidelines:
  - a. First Pool: Pool 10  $\mu\text{L}$  from each of the eight tubes in each column into a new PCR tube.

(ex. 1A-1H) into a new PCR tube, as shown.

|    |   |   |   |   |   |   |   |   |    |    |    |
|----|---|---|---|---|---|---|---|---|----|----|----|
| 1A | 2 | 3 | 4 | 5 | 6 | 7 | 8 | 9 | 10 | 11 | 12 |
| B  |   |   |   |   |   |   |   |   |    |    |    |
| C  |   |   |   |   |   |   |   |   |    |    |    |
| D  |   |   |   |   |   |   |   |   |    |    |    |
| E  |   |   |   |   |   |   |   |   |    |    |    |
| F  |   |   |   |   |   |   |   |   |    |    |    |
| G  |   |   |   |   |   |   |   |   |    |    |    |
| H  |   |   |   |   |   |   |   |   |    |    |    |

|   |   |   |   |   |   |   |   |   |    |    |    |
|---|---|---|---|---|---|---|---|---|----|----|----|
| 1 | 2 | 3 | 4 | 5 | 6 | 7 | 8 | 9 | 10 | 11 | 12 |
|---|---|---|---|---|---|---|---|---|----|----|----|

(After pool: 80  $\mu\text{L}$  each)

- b. First Purification: Purify these 12 samples with 1.0x ratio (80  $\mu\text{L}$ ) of AMPure XP beads, and elute with 25  $\mu\text{L}$  of  $\text{H}_2\text{O}$  using AMPure XP protocol.
  - c. Second Pool:

Pool 23  $\mu\text{L}$  from three tubes into one tube.

|   |   |   |   |   |   |   |   |   |    |    |    |
|---|---|---|---|---|---|---|---|---|----|----|----|
| 1 | 2 | 3 | 4 | 5 | 6 | 7 | 8 | 9 | 10 | 11 | 12 |
|---|---|---|---|---|---|---|---|---|----|----|----|

|   |   |
|---|---|
| 1 | 2 |
|---|---|

(After pool: 69  $\mu\text{L}$  each)

- d. Second Purification: Purify these four samples with another 0.8x ratio (56  $\mu\text{L}$ ) of AMPure XP beads, and elute with 21  $\mu\text{L}$   $\text{H}_2\text{O}$  using AMPure XP protocol.

8. Run a High Sensitivity DNA Chip on an Agilent Bioanalyzer.

## Making Final Sequencing Library

1. Prepare following reaction mix for each of the samples

| Final PCR Reaction Mix | Volume ( $\mu\text{L}$ ) |
|------------------------|--------------------------|
| Q5 Ultra Master Mix    | 20                       |



|                                |                             |
|--------------------------------|-----------------------------|
| 10 $\mu$ M “P5-TG” primer      | 1                           |
| 10 $\mu$ M N70x Nextera primer | 1                           |
| DNA sample                     | 18                          |
| <b>Total</b>                   | <b>40 <math>\mu</math>L</b> |

2. Proceed to PCR

|                                                                                                                                                                                                                                        |
|----------------------------------------------------------------------------------------------------------------------------------------------------------------------------------------------------------------------------------------|
| <p><b>Final PCR:</b><br/> 95°C 20s<br/> <b>4 cycles of:</b><br/> 98°C 15 s<br/> 62°C 40 s<br/> 72°C 40 s<br/> <b>3 cycles of:</b><br/> 98°C 10 s<br/> 67°C 20 s<br/> 72°C 40 s<br/> <b>Then:</b><br/> 72°C 4 min<br/> 4°C infinite</p> |
|----------------------------------------------------------------------------------------------------------------------------------------------------------------------------------------------------------------------------------------|

3. Post-PCR purification: Purify sample with 0.8x ratio of Ampure XP Beads, and elute with 10  $\mu$ L H<sub>2</sub>O using AMPure XP protocol.
4. Run a High Sensitivity DNA Chip on an Agilent Bioanalyzer to check the final concentration of the sample.
5. Sequence your sample using Illumina platform with custom Read1 sequencing primer “Read1-TG”.

# Barcode Sequences

## First Split-Pool Barcodes

| Oligo name             | Sequence                       |
|------------------------|--------------------------------|
| Adapter1-BC1-vt-#DNA1  | ACGCAGAGTCCGCTCCTAAGNNNNCA+T+G |
| Adapter1-BC1-vt-#DNA2  | ACGCAGAGTCCGCTCACAATNNNNCA+T+G |
| Adapter1-BC1-vt-#DNA3  | ACGCAGAGTCCGCTCTAATGNNNNCA+T+G |
| Adapter1-BC1-vt-#DNA4  | ACGCAGAGTCCGCTCCTTCGNNNNCA+T+G |
| Adapter1-BC1-vt-#DNA5  | ACGCAGAGTCCGCTCTATAGNNNNCA+T+G |
| Adapter1-BC1-vt-#DNA6  | ACGCAGAGTCCGCTCGGTCANNNNCA+T+G |
| Adapter1-BC1-vt-#DNA7  | ACGCAGAGTCCGCTCTGATANNNNCA+T+G |
| Adapter1-BC1-vt-#DNA8  | ACGCAGAGTCCGCTCCGACANNNNCA+T+G |
| Adapter1-BC1-vt-#DNA9  | ACGCAGAGTCCGCTCTGAGTNNNNCA+T+G |
| Adapter1-BC1-vt-#DNA10 | ACGCAGAGTCCGCTCATTCCNNNNCA+T+G |
| Adapter1-BC1-vt-#DNA11 | ACGCAGAGTCCGCTCGATCGNNNNCA+T+G |
| Adapter1-BC1-vt-#DNA12 | ACGCAGAGTCCGCTCTCAGANNNNCA+T+G |
| Adapter1-BC1-vt-#DNA13 | ACGCAGAGTCCGCTCCATGGNNNNCA+T+G |
| Adapter1-BC1-vt-#DNA14 | ACGCAGAGTCCGCTCTCTGTNNNNCA+T+G |
| Adapter1-BC1-vt-#DNA15 | ACGCAGAGTCCGCTCACTGANNNNCA+T+G |
| Adapter1-BC1-vt-#DNA16 | ACGCAGAGTCCGCTCACACANNNNCA+T+G |
| Adapter1-BC1-vt-#DNA17 | ACGCAGAGTCCGCTCAATATNNNNCA+T+G |
| Adapter1-BC1-vt-#DNA18 | ACGCAGAGTCCGCTCTCAAGNNNNCA+T+G |
| Adapter1-BC1-vt-#DNA19 | ACGCAGAGTCCGCTCTTAGGNNNNCA+T+G |
| Adapter1-BC1-vt-#DNA20 | ACGCAGAGTCCGCTCAATGCNNNNCA+T+G |
| Adapter1-BC1-vt-#DNA21 | ACGCAGAGTCCGCTCAGTACNNNNCA+T+G |
| Adapter1-BC1-vt-#DNA22 | ACGCAGAGTCCGCTCCGAATNNNNCA+T+G |
| Adapter1-BC1-vt-#DNA23 | ACGCAGAGTCCGCTCCAACGNNNNCA+T+G |
| Adapter1-BC1-vt-#DNA24 | ACGCAGAGTCCGCTCTAACANNNNCA+T+G |
| Adapter1-BC1-vt-#DNA25 | ACGCAGAGTCCGCTCGAACTNNNNCA+T+G |
| Adapter1-BC1-vt-#DNA26 | ACGCAGAGTCCGCTCATTGGNNNNCA+T+G |
| Adapter1-BC1-vt-#DNA27 | ACGCAGAGTCCGCTCCATCCNNNNCA+T+G |
| Adapter1-BC1-vt-#DNA28 | ACGCAGAGTCCGCTCATAGTNNNNCA+T+G |
| Adapter1-BC1-vt-#DNA29 | ACGCAGAGTCCGCTCTATCTNNNNCA+T+G |
| Adapter1-BC1-vt-#DNA30 | ACGCAGAGTCCGCTCTCTTANNNNCA+T+G |
| Adapter1-BC1-vt-#DNA31 | ACGCAGAGTCCGCTCGTACANNNNCA+T+G |
| Adapter1-BC1-vt-#DNA32 | ACGCAGAGTCCGCTCGTAGCNNNNCA+T+G |
| Adapter1-BC1-vt-#DNA33 | ACGCAGAGTCCGCTCTAAGCNNNNCA+T+G |
| Adapter1-BC1-vt-#DNA34 | ACGCAGAGTCCGCTCATAACNNNNCA+T+G |
| Adapter1-BC1-vt-#DNA35 | ACGCAGAGTCCGCTCCGTAGNNNNCA+T+G |
| Adapter1-BC1-vt-#DNA36 | ACGCAGAGTCCGCTCGATACNNNNCA+T+G |
| Adapter1-BC1-vt-#DNA37 | ACGCAGAGTCCGCTCTGACGNNNNCA+T+G |
| Adapter1-BC1-vt-#DNA38 | ACGCAGAGTCCGCTCGATGTNNNNCA+T+G |
| Adapter1-BC1-vt-#DNA39 | ACGCAGAGTCCGCTCAGTGTNNNNCA+T+G |
| Adapter1-BC1-vt-#DNA40 | ACGCAGAGTCCGCTCAGTCGNNNNCA+T+G |
| Adapter1-BC1-vt-#DNA41 | ACGCAGAGTCCGCTCAATCANNNNCA+T+G |
| Adapter1-BC1-vt-#DNA42 | ACGCAGAGTCCGCTCACTCTNNNNCA+T+G |
| Adapter1-BC1-vt-#DNA43 | ACGCAGAGTCCGCTCAATTGNNNNCA+T+G |
| Adapter1-BC1-vt-#DNA44 | ACGCAGAGTCCGCTCCTATCNNNNCA+T+G |
| Adapter1-BC1-vt-#DNA45 | ACGCAGAGTCCGCTCCGTGANNNNCA+T+G |
| Adapter1-BC1-vt-#DNA46 | ACGCAGAGTCCGCTCTCTACNNNNCA+T+G |
| Adapter1-BC1-vt-#DNA47 | ACGCAGAGTCCGCTCTGTCCNNNNCA+T+G |
| Adapter1-BC1-vt-#DNA48 | ACGCAGAGTCCGCTCGCATANNNNCA+T+G |
| Adapter1-BC1-vt-#DNA49 | ACGCAGAGTCCGCTCACTAGNNNNCA+T+G |
| Adapter1-BC1-vt-#DNA50 | ACGCAGAGTCCGCTCGCACGNNNNCA+T+G |

|                        |                                 |
|------------------------|---------------------------------|
| Adapter1-BC1-vt-#DNA51 | ACGCAGAGTCCGCTCAGAAGNNNNCA+T+G  |
| Adapter1-BC1-vt-#DNA52 | ACGCAGAGTCCGCTCACTTCNNNNCA+T+G  |
| Adapter1-BC1-vt-#DNA53 | ACGCAGAGTCCGCTCGATTANNNNCA+T+G  |
| Adapter1-BC1-vt-#DNA54 | ACGCAGAGTCCGCTCCGTCTNNNNCA+T+G  |
| Adapter1-BC1-vt-#DNA55 | ACGCAGAGTCCGCTCTATTCNNNNCA+T+G  |
| Adapter1-BC1-vt-#DNA56 | ACGCAGAGTCCGCTCGTAATNNNNCA+T+G  |
| Adapter1-BC1-vt-#DNA57 | ACGCAGAGTCCGCTCATATANNNNCA+T+G  |
| Adapter1-BC1-vt-#DNA58 | ACGCAGAGTCCGCTCAGACTNNNNCA+T+G  |
| Adapter1-BC1-vt-#DNA59 | ACGCAGAGTCCGCTCATTAAANNNNCA+T+G |
| Adapter1-BC1-vt-#DNA60 | ACGCAGAGTCCGCTCTCTCGNNNNCA+T+G  |
| Adapter1-BC1-vt-#DNA61 | ACGCAGAGTCCGCTCCGATGNNNNCA+T+G  |
| Adapter1-BC1-vt-#DNA62 | ACGCAGAGTCCGCTCGCTAANNNNCA+T+G  |
| Adapter1-BC1-vt-#DNA63 | ACGCAGAGTCCGCTCTGTGNNNNCA+T+G   |
| Adapter1-BC1-vt-#DNA64 | ACGCAGAGTCCGCTCGTATGNNNNCA+T+G  |
| Adapter1-BC1-vt-#DNA65 | ACGCAGAGTCCGCTCACATGNNNNCA+T+G  |
| Adapter1-BC1-vt-#DNA66 | ACGCAGAGTCCGCTCGGATTNNNNCA+T+G  |
| Adapter1-BC1-vt-#DNA67 | ACGCAGAGTCCGCTCCAATANNNNCA+T+G  |
| Adapter1-BC1-vt-#DNA68 | ACGCAGAGTCCGCTCGCAGTNNNNCA+T+G  |
| Adapter1-BC1-vt-#DNA69 | ACGCAGAGTCCGCTCTTACCNNNNCA+T+G  |
| Adapter1-BC1-vt-#DNA70 | ACGCAGAGTCCGCTCTCATCNNNNCA+T+G  |
| Adapter1-BC1-vt-#DNA71 | ACGCAGAGTCCGCTCAGATCNNNNCA+T+G  |
| Adapter1-BC1-vt-#DNA72 | ACGCAGAGTCCGCTCGTTAGNNNNCA+T+G  |
| Adapter1-BC1-vt-#DNA73 | ACGCAGAGTCCGCTCGTTGANNNNCA+T+G  |
| Adapter1-BC1-vt-#DNA74 | ACGCAGAGTCCGCTCCAAGTNNNNCA+T+G  |
| Adapter1-BC1-vt-#DNA75 | ACGCAGAGTCCGCTCCTTGTNNNNCA+T+G  |
| Adapter1-BC1-vt-#DNA76 | ACGCAGAGTCCGCTCGAAGANNNNCA+T+G  |
| Adapter1-BC1-vt-#DNA77 | ACGCAGAGTCCGCTCGTAANNNNCA+T+G   |
| Adapter1-BC1-vt-#DNA78 | ACGCAGAGTCCGCTCTCACTNNNNCA+T+G  |
| Adapter1-BC1-vt-#DNA79 | ACGCAGAGTCCGCTCGCAACNNNNCA+T+G  |
| Adapter1-BC1-vt-#DNA80 | ACGCAGAGTCCGCTCACAGCNNNNCA+T+G  |
| Adapter1-BC1-vt-#DNA81 | ACGCAGAGTCCGCTCCTACTNNNNCA+T+G  |
| Adapter1-BC1-vt-#DNA82 | ACGCAGAGTCCGCTCGAATCNNNNCA+T+G  |
| Adapter1-BC1-vt-#DNA83 | ACGCAGAGTCCGCTCAGAGANNNNCA+T+G  |
| Adapter1-BC1-vt-#DNA84 | ACGCAGAGTCCGCTCAGTTANNNNCA+T+G  |
| Adapter1-BC1-vt-#DNA85 | ACGCAGAGTCCGCTCCATAANNNNCA+T+G  |
| Adapter1-BC1-vt-#DNA86 | ACGCAGAGTCCGCTCGGTTGNNNNCA+T+G  |
| Adapter1-BC1-vt-#DNA87 | ACGCAGAGTCCGCTCGGTATNNNNCA+T+G  |
| Adapter1-BC1-vt-#DNA88 | ACGCAGAGTCCGCTCCTAGANNNNCA+T+G  |
| Adapter1-BC1-vt-#DNA89 | ACGCAGAGTCCGCTCATACGNNNNCA+T+G  |
| Adapter1-BC1-vt-#DNA90 | ACGCAGAGTCCGCTCCGTTNNNNCA+T+G   |
| Adapter1-BC1-vt-#DNA91 | ACGCAGAGTCCGCTCTGAACNNNNCA+T+G  |
| Adapter1-BC1-vt-#DNA92 | ACGCAGAGTCCGCTCGTTCTNNNNCA+T+G  |
| Adapter1-BC1-vt-#DNA93 | ACGCAGAGTCCGCTCCTTACNNNNCA+T+G  |
| Adapter1-BC1-vt-#DNA94 | ACGCAGAGTCCGCTCTTATTNNNNCA+T+G  |
| Adapter1-BC1-vt-#DNA95 | ACGCAGAGTCCGCTCTATGANNNNCA+T+G  |
| Adapter1-BC1-vt-#DNA96 | ACGCAGAGTCCGCTCCTAAGNNNNCA+T+G  |

## Second Split-Pool Barcodes

| Oligo name                   | Sequence                                                  |
|------------------------------|-----------------------------------------------------------|
| Adapter2-BC2-Adapter1-#DNA1  | GTCTCGTGGGCTCGGAGATGTGTATAAGAGACAG ATGAAT ACGCAGAGTCCGCTC |
| Adapter2-BC2-Adapter1-#DNA2  | GTCTCGTGGGCTCGGAGATGTGTATAAGAGACAG ATATTA ACGCAGAGTCCGCTC |
| Adapter2-BC2-Adapter1-#DNA3  | GTCTCGTGGGCTCGGAGATGTGTATAAGAGACAG AATCGA ACGCAGAGTCCGCTC |
| Adapter2-BC2-Adapter1-#DNA4  | GTCTCGTGGGCTCGGAGATGTGTATAAGAGACAG CACATA ACGCAGAGTCCGCTC |
| Adapter2-BC2-Adapter1-#DNA5  | GTCTCGTGGGCTCGGAGATGTGTATAAGAGACAG GTGATG ACGCAGAGTCCGCTC |
| Adapter2-BC2-Adapter1-#DNA6  | GTCTCGTGGGCTCGGAGATGTGTATAAGAGACAG AGGTTT ACGCAGAGTCCGCTC |
| Adapter2-BC2-Adapter1-#DNA7  | GTCTCGTGGGCTCGGAGATGTGTATAAGAGACAG ATAACG ACGCAGAGTCCGCTC |
| Adapter2-BC2-Adapter1-#DNA8  | GTCTCGTGGGCTCGGAGATGTGTATAAGAGACAG AACGTA ACGCAGAGTCCGCTC |
| Adapter2-BC2-Adapter1-#DNA9  | GTCTCGTGGGCTCGGAGATGTGTATAAGAGACAG CAAGCA ACGCAGAGTCCGCTC |
| Adapter2-BC2-Adapter1-#DNA10 | GTCTCGTGGGCTCGGAGATGTGTATAAGAGACAG AGGTAC ACGCAGAGTCCGCTC |
| Adapter2-BC2-Adapter1-#DNA11 | GTCTCGTGGGCTCGGAGATGTGTATAAGAGACAG GATGGA ACGCAGAGTCCGCTC |
| Adapter2-BC2-Adapter1-#DNA12 | GTCTCGTGGGCTCGGAGATGTGTATAAGAGACAG GAGGAA ACGCAGAGTCCGCTC |
| Adapter2-BC2-Adapter1-#DNA13 | GTCTCGTGGGCTCGGAGATGTGTATAAGAGACAG CAGATT ACGCAGAGTCCGCTC |
| Adapter2-BC2-Adapter1-#DNA14 | GTCTCGTGGGCTCGGAGATGTGTATAAGAGACAG CTAATC ACGCAGAGTCCGCTC |
| Adapter2-BC2-Adapter1-#DNA15 | GTCTCGTGGGCTCGGAGATGTGTATAAGAGACAG ATTCTT ACGCAGAGTCCGCTC |
| Adapter2-BC2-Adapter1-#DNA16 | GTCTCGTGGGCTCGGAGATGTGTATAAGAGACAG GGTCTA ACGCAGAGTCCGCTC |
| Adapter2-BC2-Adapter1-#DNA17 | GTCTCGTGGGCTCGGAGATGTGTATAAGAGACAG GTACTA ACGCAGAGTCCGCTC |
| Adapter2-BC2-Adapter1-#DNA18 | GTCTCGTGGGCTCGGAGATGTGTATAAGAGACAG GTTCAC ACGCAGAGTCCGCTC |
| Adapter2-BC2-Adapter1-#DNA19 | GTCTCGTGGGCTCGGAGATGTGTATAAGAGACAG CAACAC ACGCAGAGTCCGCTC |
| Adapter2-BC2-Adapter1-#DNA20 | GTCTCGTGGGCTCGGAGATGTGTATAAGAGACAG ATAGTT ACGCAGAGTCCGCTC |
| Adapter2-BC2-Adapter1-#DNA21 | GTCTCGTGGGCTCGGAGATGTGTATAAGAGACAG AACTAT ACGCAGAGTCCGCTC |
| Adapter2-BC2-Adapter1-#DNA22 | GTCTCGTGGGCTCGGAGATGTGTATAAGAGACAG GGGAAA ACGCAGAGTCCGCTC |
| Adapter2-BC2-Adapter1-#DNA23 | GTCTCGTGGGCTCGGAGATGTGTATAAGAGACAG GGTTAG ACGCAGAGTCCGCTC |
| Adapter2-BC2-Adapter1-#DNA24 | GTCTCGTGGGCTCGGAGATGTGTATAAGAGACAG AGTACA ACGCAGAGTCCGCTC |
| Adapter2-BC2-Adapter1-#DNA25 | GTCTCGTGGGCTCGGAGATGTGTATAAGAGACAG ATGGAA ACGCAGAGTCCGCTC |
| Adapter2-BC2-Adapter1-#DNA26 | GTCTCGTGGGCTCGGAGATGTGTATAAGAGACAG AGTGTG ACGCAGAGTCCGCTC |
| Adapter2-BC2-Adapter1-#DNA27 | GTCTCGTGGGCTCGGAGATGTGTATAAGAGACAG GGTTTC ACGCAGAGTCCGCTC |
| Adapter2-BC2-Adapter1-#DNA28 | GTCTCGTGGGCTCGGAGATGTGTATAAGAGACAG CATCAA ACGCAGAGTCCGCTC |
| Adapter2-BC2-Adapter1-#DNA29 | GTCTCGTGGGCTCGGAGATGTGTATAAGAGACAG ATCGTG ACGCAGAGTCCGCTC |
| Adapter2-BC2-Adapter1-#DNA30 | GTCTCGTGGGCTCGGAGATGTGTATAAGAGACAG CCATAG ACGCAGAGTCCGCTC |
| Adapter2-BC2-Adapter1-#DNA31 | GTCTCGTGGGCTCGGAGATGTGTATAAGAGACAG AAACGT ACGCAGAGTCCGCTC |
| Adapter2-BC2-Adapter1-#DNA32 | GTCTCGTGGGCTCGGAGATGTGTATAAGAGACAG ATTGTA ACGCAGAGTCCGCTC |
| Adapter2-BC2-Adapter1-#DNA33 | GTCTCGTGGGCTCGGAGATGTGTATAAGAGACAG ATGAGG ACGCAGAGTCCGCTC |
| Adapter2-BC2-Adapter1-#DNA34 | GTCTCGTGGGCTCGGAGATGTGTATAAGAGACAG CCTAAG ACGCAGAGTCCGCTC |
| Adapter2-BC2-Adapter1-#DNA35 | GTCTCGTGGGCTCGGAGATGTGTATAAGAGACAG GTCAGT ACGCAGAGTCCGCTC |
| Adapter2-BC2-Adapter1-#DNA36 | GTCTCGTGGGCTCGGAGATGTGTATAAGAGACAG ATCAAG ACGCAGAGTCCGCTC |
| Adapter2-BC2-Adapter1-#DNA37 | GTCTCGTGGGCTCGGAGATGTGTATAAGAGACAG ATTGAC ACGCAGAGTCCGCTC |
| Adapter2-BC2-Adapter1-#DNA38 | GTCTCGTGGGCTCGGAGATGTGTATAAGAGACAG AAGTCA ACGCAGAGTCCGCTC |
| Adapter2-BC2-Adapter1-#DNA39 | GTCTCGTGGGCTCGGAGATGTGTATAAGAGACAG CCTAGT ACGCAGAGTCCGCTC |
| Adapter2-BC2-Adapter1-#DNA40 | GTCTCGTGGGCTCGGAGATGTGTATAAGAGACAG CCAATA ACGCAGAGTCCGCTC |
| Adapter2-BC2-Adapter1-#DNA41 | GTCTCGTGGGCTCGGAGATGTGTATAAGAGACAG CAAAGT ACGCAGAGTCCGCTC |
| Adapter2-BC2-Adapter1-#DNA42 | GTCTCGTGGGCTCGGAGATGTGTATAAGAGACAG AAGCAT ACGCAGAGTCCGCTC |
| Adapter2-BC2-Adapter1-#DNA43 | GTCTCGTGGGCTCGGAGATGTGTATAAGAGACAG CTCTCT ACGCAGAGTCCGCTC |
| Adapter2-BC2-Adapter1-#DNA44 | GTCTCGTGGGCTCGGAGATGTGTATAAGAGACAG AGCAGT ACGCAGAGTCCGCTC |
| Adapter2-BC2-Adapter1-#DNA45 | GTCTCGTGGGCTCGGAGATGTGTATAAGAGACAG ATGGCT ACGCAGAGTCCGCTC |
| Adapter2-BC2-Adapter1-#DNA46 | GTCTCGTGGGCTCGGAGATGTGTATAAGAGACAG GAACCA ACGCAGAGTCCGCTC |
| Adapter2-BC2-Adapter1-#DNA47 | GTCTCGTGGGCTCGGAGATGTGTATAAGAGACAG AAGATG ACGCAGAGTCCGCTC |
| Adapter2-BC2-Adapter1-#DNA48 | GTCTCGTGGGCTCGGAGATGTGTATAAGAGACAG CATAAT ACGCAGAGTCCGCTC |
| Adapter2-BC2-Adapter1-#DNA49 | GTCTCGTGGGCTCGGAGATGTGTATAAGAGACAG AGCTAG ACGCAGAGTCCGCTC |
| Adapter2-BC2-Adapter1-#DNA50 | GTCTCGTGGGCTCGGAGATGTGTATAAGAGACAG GTTAAG ACGCAGAGTCCGCTC |
| Adapter2-BC2-Adapter1-#DNA51 | GTCTCGTGGGCTCGGAGATGTGTATAAGAGACAG CCTGAA ACGCAGAGTCCGCTC |
| Adapter2-BC2-Adapter1-#DNA52 | GTCTCGTGGGCTCGGAGATGTGTATAAGAGACAG CTTCCA ACGCAGAGTCCGCTC |
| Adapter2-BC2-Adapter1-#DNA53 | GTCTCGTGGGCTCGGAGATGTGTATAAGAGACAG CTCAAT ACGCAGAGTCCGCTC |

|                              |                                                           |
|------------------------------|-----------------------------------------------------------|
| Adapter2-BC2-Adapter1-#DNA54 | GTCTCGTGGGCTCGGAGATGTGTATAAGAGACAG GTTTCG ACGCAGAGTCCGCTC |
| Adapter2-BC2-Adapter1-#DNA55 | GTCTCGTGGGCTCGGAGATGTGTATAAGAGACAG ATGACA ACGCAGAGTCCGCTC |
| Adapter2-BC2-Adapter1-#DNA56 | GTCTCGTGGGCTCGGAGATGTGTATAAGAGACAG AAAGGG ACGCAGAGTCCGCTC |
| Adapter2-BC2-Adapter1-#DNA57 | GTCTCGTGGGCTCGGAGATGTGTATAAGAGACAG ATTAGT ACGCAGAGTCCGCTC |
| Adapter2-BC2-Adapter1-#DNA58 | GTCTCGTGGGCTCGGAGATGTGTATAAGAGACAG CTAACA ACGCAGAGTCCGCTC |
| Adapter2-BC2-Adapter1-#DNA59 | GTCTCGTGGGCTCGGAGATGTGTATAAGAGACAG CCTTTC ACGCAGAGTCCGCTC |
| Adapter2-BC2-Adapter1-#DNA60 | GTCTCGTGGGCTCGGAGATGTGTATAAGAGACAG AGTATT ACGCAGAGTCCGCTC |
| Adapter2-BC2-Adapter1-#DNA61 | GTCTCGTGGGCTCGGAGATGTGTATAAGAGACAG CAACTT ACGCAGAGTCCGCTC |
| Adapter2-BC2-Adapter1-#DNA62 | GTCTCGTGGGCTCGGAGATGTGTATAAGAGACAG AGAGCA ACGCAGAGTCCGCTC |
| Adapter2-BC2-Adapter1-#DNA63 | GTCTCGTGGGCTCGGAGATGTGTATAAGAGACAG CTAGTG ACGCAGAGTCCGCTC |
| Adapter2-BC2-Adapter1-#DNA64 | GTCTCGTGGGCTCGGAGATGTGTATAAGAGACAG CAGTAA ACGCAGAGTCCGCTC |
| Adapter2-BC2-Adapter1-#DNA65 | GTCTCGTGGGCTCGGAGATGTGTATAAGAGACAG AACCTC ACGCAGAGTCCGCTC |
| Adapter2-BC2-Adapter1-#DNA66 | GTCTCGTGGGCTCGGAGATGTGTATAAGAGACAG AATTAG ACGCAGAGTCCGCTC |
| Adapter2-BC2-Adapter1-#DNA67 | GTCTCGTGGGCTCGGAGATGTGTATAAGAGACAG CATTTC ACGCAGAGTCCGCTC |
| Adapter2-BC2-Adapter1-#DNA68 | GTCTCGTGGGCTCGGAGATGTGTATAAGAGACAG GATTAT ACGCAGAGTCCGCTC |
| Adapter2-BC2-Adapter1-#DNA69 | GTCTCGTGGGCTCGGAGATGTGTATAAGAGACAG GTGTCT ACGCAGAGTCCGCTC |
| Adapter2-BC2-Adapter1-#DNA70 | GTCTCGTGGGCTCGGAGATGTGTATAAGAGACAG GGTTC ACGCAGAGTCCGCTC  |
| Adapter2-BC2-Adapter1-#DNA71 | GTCTCGTGGGCTCGGAGATGTGTATAAGAGACAG CTTAGG ACGCAGAGTCCGCTC |
| Adapter2-BC2-Adapter1-#DNA72 | GTCTCGTGGGCTCGGAGATGTGTATAAGAGACAG GATATT ACGCAGAGTCCGCTC |
| Adapter2-BC2-Adapter1-#DNA73 | GTCTCGTGGGCTCGGAGATGTGTATAAGAGACAG GTATTG ACGCAGAGTCCGCTC |
| Adapter2-BC2-Adapter1-#DNA74 | GTCTCGTGGGCTCGGAGATGTGTATAAGAGACAG CATCCT ACGCAGAGTCCGCTC |
| Adapter2-BC2-Adapter1-#DNA75 | GTCTCGTGGGCTCGGAGATGTGTATAAGAGACAG GAGTTC ACGCAGAGTCCGCTC |
| Adapter2-BC2-Adapter1-#DNA76 | GTCTCGTGGGCTCGGAGATGTGTATAAGAGACAG AATGTC ACGCAGAGTCCGCTC |
| Adapter2-BC2-Adapter1-#DNA77 | GTCTCGTGGGCTCGGAGATGTGTATAAGAGACAG CCTTCA ACGCAGAGTCCGCTC |
| Adapter2-BC2-Adapter1-#DNA78 | GTCTCGTGGGCTCGGAGATGTGTATAAGAGACAG CATAAG ACGCAGAGTCCGCTC |
| Adapter2-BC2-Adapter1-#DNA79 | GTCTCGTGGGCTCGGAGATGTGTATAAGAGACAG ATATAG ACGCAGAGTCCGCTC |
| Adapter2-BC2-Adapter1-#DNA80 | GTCTCGTGGGCTCGGAGATGTGTATAAGAGACAG AAAACG ACGCAGAGTCCGCTC |
| Adapter2-BC2-Adapter1-#DNA81 | GTCTCGTGGGCTCGGAGATGTGTATAAGAGACAG AGAAGG ACGCAGAGTCCGCTC |
| Adapter2-BC2-Adapter1-#DNA82 | GTCTCGTGGGCTCGGAGATGTGTATAAGAGACAG AAGGTT ACGCAGAGTCCGCTC |
| Adapter2-BC2-Adapter1-#DNA83 | GTCTCGTGGGCTCGGAGATGTGTATAAGAGACAG ATCGCA ACGCAGAGTCCGCTC |
| Adapter2-BC2-Adapter1-#DNA84 | GTCTCGTGGGCTCGGAGATGTGTATAAGAGACAG ATCAGC ACGCAGAGTCCGCTC |
| Adapter2-BC2-Adapter1-#DNA85 | GTCTCGTGGGCTCGGAGATGTGTATAAGAGACAG GGTAAT ACGCAGAGTCCGCTC |
| Adapter2-BC2-Adapter1-#DNA86 | GTCTCGTGGGCTCGGAGATGTGTATAAGAGACAG AGCAAC ACGCAGAGTCCGCTC |
| Adapter2-BC2-Adapter1-#DNA87 | GTCTCGTGGGCTCGGAGATGTGTATAAGAGACAG GTCACA ACGCAGAGTCCGCTC |
| Adapter2-BC2-Adapter1-#DNA88 | GTCTCGTGGGCTCGGAGATGTGTATAAGAGACAG ATGTGA ACGCAGAGTCCGCTC |
| Adapter2-BC2-Adapter1-#DNA89 | GTCTCGTGGGCTCGGAGATGTGTATAAGAGACAG CATAGA ACGCAGAGTCCGCTC |
| Adapter2-BC2-Adapter1-#DNA90 | GTCTCGTGGGCTCGGAGATGTGTATAAGAGACAG AACTTG ACGCAGAGTCCGCTC |
| Adapter2-BC2-Adapter1-#DNA91 | GTCTCGTGGGCTCGGAGATGTGTATAAGAGACAG CAGAAG ACGCAGAGTCCGCTC |
| Adapter2-BC2-Adapter1-#DNA92 | GTCTCGTGGGCTCGGAGATGTGTATAAGAGACAG GGAACT ACGCAGAGTCCGCTC |
| Adapter2-BC2-Adapter1-#DNA93 | GTCTCGTGGGCTCGGAGATGTGTATAAGAGACAG AGTTCG ACGCAGAGTCCGCTC |
| Adapter2-BC2-Adapter1-#DNA94 | GTCTCGTGGGCTCGGAGATGTGTATAAGAGACAG GAAGGT ACGCAGAGTCCGCTC |
| Adapter2-BC2-Adapter1-#DNA95 | GTCTCGTGGGCTCGGAGATGTGTATAAGAGACAG AGAGTC ACGCAGAGTCCGCTC |
| Adapter2-BC2-Adapter1-#DNA96 | GTCTCGTGGGCTCGGAGATGTGTATAAGAGACAG ATTCAG ACGCAGAGTCCGCTC |

## Supplemental Method S2

# Single-Cell RNA BAG-seq Laboratory Protocol

### Equipment (similar to Drop-seq/DroNc-seq set-up):

| Name                                                                   | Company                | Catalog Number |
|------------------------------------------------------------------------|------------------------|----------------|
| Inverted Microscope                                                    | Motic                  | AE31           |
| Legato 100 Syringe Pumps (3)                                           | KD Scientific          | 788100         |
| 3 mL Syringes                                                          | Becton Dickinson       | 309657         |
| 10 mL Syringes                                                         | Becton Dickinson       | 302995         |
| PE-2 Tubing                                                            | Scientific Commodities | BB31695-PE/2   |
| 26 Gauge Needles                                                       | Becton Dickinson       | 305111         |
| 22 Gauge Needles                                                       | Becton Dickinson       | 305155         |
| 16 Gauge Needles                                                       | Becton Dickinson       | 305197         |
| PDMS co-flow microfluidic droplet generation device "DroNc-seq device" | Nanoshift, LLC         |                |
| 40 µm cell strainers                                                   | Corning                | 352340         |
| 70 µm cell strainers                                                   | Corning                | 431751         |

### Primers:

| Name                             | Sequence                                                                                       |
|----------------------------------|------------------------------------------------------------------------------------------------|
| Linker A2                        | /5ACryd//iSp18/AAGCAGTGGTATCAACGCAGAGTNNWNNNSTTTTT<br>TTTTTTTTTTTTTTTTTTTTTTTTTTTTTTTT         |
| Adapter1-BC1-vt-<br>#RNAx        | AGTGGAAAAGGAAGGTGGT <barcode1> NNNNNN rGrGrG<br>(detailed sequences at bottom)                 |
| Adapter2-BC2-<br>Adapter1-#RNAx  | GACCGACTCGCATTACCCTAT <barcode2><br>AGTGGAAAAGGAAGGTGG/3InvdT/ (detailed sequences at bottom)  |
| Adapter3-BC3-<br>Adapter2-#RNAx  | AAGGCTCTTGACACGAAGGATAG <barcode3>NN<br>GACCGACTCGCATTACCCT*A*T (detailed sequences at bottom) |
| IS-short primer                  | AAGCAGTGGTATCAACGCAG                                                                           |
| P5-SAM                           | AATGATACGGCGACCACCGAGATCTACAC CGCTGTCC<br>AAGGCTCTTGACACGAAGGAT*A*G                            |
| Read1-SAM                        | CGCTGTCC AAGGCTCTTGACACGAAGGATAG                                                               |
| Adapter3-BC2a-<br>Adapter1-#RNAx | AAGGCTCTTGACACGAAGGATAG <barcode2a><br>AGTGGAAAAGGAAGGTG*G*T (detailed sequences at bottom)    |

### Chemical Reagents:

| Name                                       | Company                  | Catalog Number |
|--------------------------------------------|--------------------------|----------------|
| <b>Cell Preparation</b>                    |                          |                |
| 10X PBS                                    | Thermo Fisher Scientific | AM9624         |
| UltraPure BSA                              | Thermo Fisher Scientific | AM2618         |
| Trypsin-EDTA(0.25%, phenol red)            | Thermo Fisher Scientific | 25200056       |
| <b>Aqueous Phase 2</b>                     |                          |                |
| Acrylamide/bis-acrylamide, 40%<br>solution | Sigma-Aldrich            | A9926          |
| Acrylamide solution, 40%                   | Sigma-Aldrich            | A4058          |

|                                 |                          |                         |
|---------------------------------|--------------------------|-------------------------|
| 0.5 M EDTA                      | Thermo Fisher Scientific | AM9260G                 |
| 20% Sarkosyl                    | Sigma-Aldrich            | L7414                   |
| SUPERase In RNase Inhibitor     | Thermo Fisher Scientific | AM2696                  |
| 0.1M DTT                        | Thermo Fisher Scientific | 707265ML                |
| Ammonium persulfate             | Sigma-Aldrich            | 09913-100G              |
| 10% NP-40                       | Thermo Fisher Scientific | 28324                   |
| <b>Oil Phase</b>                |                          |                         |
| HFE-7500                        | Oakwood Chemical         | 051243                  |
| 008-Fluorosurfactant            | Ran Biotechnologies      | 008-FluoroSurfactant-5G |
| TEMED                           | Bio-Rad                  | 1610801                 |
| <b>Post-Droplet Generation</b>  |                          |                         |
| Mineral Oil                     | Sigma-Aldrich            | 69794-500ML             |
| 20X SSC                         | Thermo Fisher Scientific | 15557044                |
| Perfluorooctanol (PFO)          | Sigma-Aldrich            | 370533                  |
| Maxima H Reverse Transcriptase  | Thermo Fisher Scientific | EP0753                  |
| 10 mM dNTP                      | Sigma-Aldrich            | 11814362001             |
| Exonuclease I                   | New England Bio Labs     | M0293                   |
| Ribonuclease H                  | Thermo Fisher Scientific | 18021-071               |
| Bst 2.0 DNA Polymerase          | New England Bio Labs     | M0537L                  |
| KAPA HiFi HotStart ReadyMix     | Roche                    | KK2602                  |
| Agencourt AMPure XP beads       | Beckman Coulter          | A63880                  |
| Nextera XT DNA Library Prep Kit | Illumina                 | FC-131-1024             |

## Chemical Solutions to Prepare

- PBS-BSA (1X PBS, 0.05% BSA)
- 20% Surfactant in HFE-7500
- 10% Ammonium persulfate
- 6X SSC
- TE-SDS (10 mM Tris pH 8.0, 1 mM EDTA, 0.5% SDS)
- STOP-25 (10 mM Tris pH 8.0, 25 mM EDTA, 0.1% Tween-20, 0.1 M KCl)
- STOP-10 (10 mM Tris pH 8.0, 10 mM EDTA, 0.1% Tween-20, 0.1 M KCl)
- STOP-1 (10 mM Tris pH 8.0, 1 mM EDTA, 0.1% Tween-20, 0.1 M KCl)
- 1X Exonuclease Reaction Buffer
- HBW (10 mM Tris pH 8.0, 1 mM EDTA, 0.1% Tween-20)

# scRNA BAG-seq Experiment

## Cell Solution Preparation

1. Warm trypsin, 1X PBS and tissue culture media in a 37°C water bath.
2. Prepare PBS-BSA solution on ice.
3. Retrieve adherent cells from incubator and discard tissue culture media from plates.
4. Add 8 mL 1X PBS to each plate. Tilt plates back and forth to wash adherent cells. Then, discard PBS.
5. Trypsinize cells for 5 minutes with 1 mL warm Trypsin-EDTA. Then, add 6 mL tissue culture media to plate and pipet up and down multiple times. Collect solution in a 15 mL conical tube.
6. Centrifuge cells 300 rcf for 5 minutes. Discard supernatant.
7. Resuspend pellet with 8 mL 1X PBS. Centrifuge cells 300 rcf for 5 minutes. Discard supernatant.
8. Resuspend pellet with 1.5 mL PBS-BSA and filter cell solution through a 40 µm strainer.
9. Count cells.
10. Prepare a 1 mL solution of cells with a concentration of 2.5E5 cells/mL.

## Oil Phase Preparation

1. Combine the following; vortex to mix (*enough for 2 samples*):
  - 600 µL 20% surfactant
  - 9.6 µL TEMED
  - 1.8 mL HFE7500

## Aqueous Phase 2 Preparation

1. Combine the following; pipet to mix (*enough for 2 samples*):

| Aqueous Phase 2 Solution      | Volume (µL) | Final Concentration |
|-------------------------------|-------------|---------------------|
| AA/bis-acrylamide, 40%        | 180         |                     |
| Acrylamide solution, 40%      | 129         |                     |
| H <sub>2</sub> O              | 191         |                     |
| 500 µM LinkerA2 primer        | 80          | 20 µM               |
| 0.5 M EDTA                    | 50          | 12.5 mM             |
| 1 M Tris pH 7.5               | 70          | 35 mM               |
| 20 % Sarkosyl                 | 10          | 0.1%                |
| SUPERase In RNase Inhibitor   | 100         | 1 U/µL              |
| 0.1 M DTT                     | 30          | 1.5 mM              |
| 10% NP-40                     | 100         | 0.5%                |
| 10% Ammonium persulfate (APS) | 60          | 0.3%                |
| <b>Total</b>                  | <b>1 mL</b> |                     |

## Microfluidics Setup & Oil Droplet Collection

1. Turn on microscope. Place microfluidic device on microscope stage.
2. Insert a piece of PE/2 tubing into the output well and place the other end into a waste container (15 mL conical tube).
3. Use the following syringes to collect the three solutions.



- a. **Oil Phase:** Use a 10 mL syringe with a 16 G needle to aspirate solution into the syringe.
- b. **Cell Solution or Aqueous Phase 2:** Use a 3 mL syringe and a 22 G needle to aspirate solution into the syringe.
4. For each syringe, change the needle to a 26 G needle and insert into PE/2 tubing.
5. Place syringes into their designated syringe pumps and insert tubing into the corresponding wells of the microfluidics chamber
  - a. From left to right: Oil – Aqueous 2 – Cell Solution (Aqueous 1) – Output
6. Once all syringes and tubing are in place, set the following flow rates:
  - a. **Oil Phase:** 3,000  $\mu\text{L/hr}$
  - b. **Cell Solution:** 750  $\mu\text{L/hr}$
  - c. **Aqueous Phase 2:** 750  $\mu\text{L/hr}$
7. Begin by first turning on the cell solution pump.
8. Once cell solution is flowing, turn on the aqueous phase 2 pump.
9. Once the interphase between cell solution and aqueous phase two has stabilized, turn on the oil phase pump and wait for the droplet formation to stabilize.
10. Once the flow has stabilized, place the output tubing on a glass slide under the microscope to assess the size uniformity of oil droplets.
11. Once droplet size is uniform, collect droplets in 300  $\mu\text{L}$  of mineral oil in 1.5 mL tubes.
12. After collection, incubate BAGs at room temperature for 2.5 hours.
13. Incubate BAGs at 50°C for 5 minutes, then incubate at room temperature for 10 minutes.

## Droplet Breakage

1. Remove mineral oil in the top layer using pipet. Remove oil in the bottom layer using a 3 mL syringe and 22G needle.
2. Add 600  $\mu\text{L}$  6X SSC buffer and 150  $\mu\text{L}$  perfluorooctanol (PFO) in a fume hood. Shake the tube by hand to break the droplets and release balls of acrylamide gel (BAGs).
3. Centrifuge 1000 rcf for 1.5 minutes.
4. Discard the top and bottom layer, leaving the translucent BAG layer in the tube.
5. Add 600  $\mu\text{L}$  6x SSC and shake tube multiple times. Centrifuge 1000 rcf for 1.5 minutes. Discard the top layer and any visible PFO from the bottom of the tube.

## Reverse Transcription / First Split-Pool

1. Wash the BAG layer from previous step with the following RT wash solution.
  - a. **RT wash solution:** 850  $\mu\text{L}$  5x Reverse Transcriptase Buffer, 25  $\mu\text{L}$  0.1M DTT, and 25  $\mu\text{L}$  SUPERase In RNase inhibitor
  - b. Pipet up and down, centrifuge 1000 rcf for 1.5 minutes, discard the supernatant.
2. Prepare the following BAG solution; pipet up and down to mix:

| BAG Solution                | Volume ( $\mu\text{L}$ ) |
|-----------------------------|--------------------------|
| 5x RT Buffer                | 250                      |
| SUPERase In RNase Inhibitor | 15                       |
| 0.1 M DTT                   | 15                       |
| BAGs                        | 200                      |
| <b>Total</b>                | <b>480</b>               |

- a. Transfer 60  $\mu\text{L}$  BAG solution to each tube of 8-well PCR strip.
- b. Quickly transfer 5  $\mu\text{L}$  into each tube of a 96-well plate using a multipipette.
3. Prepare the following reverse transcription master mix in a 5 ml tube; vortex to mix:

| Reverse Transcription Master Mix | Volume ( $\mu\text{L}$ ) |
|----------------------------------|--------------------------|
| H <sub>2</sub> O                 | 1048                     |
| 10 mM dNTP                       | 200                      |
| 0.1 M DTT                        | 100                      |
| SUPERase In RNase Inhibitor      | 52                       |
| Maxima H- Reverse Transcriptase  | 100                      |
| <b>Total</b>                     | <b>1.5 mL</b>            |

- a. Transfer 185  $\mu\text{L}$  Reverse Transcription Master Mix into each well of an 8-well PCR strip.
- b. Transfer 13.5  $\mu\text{L}$  into each well of the 96-well plate.
4. Add 2  $\mu\text{L}$  of well-specific 50  $\mu\text{M}$  Template-Switch Oligos (“Adapter1-BC1-vt-#RNAx”) into each corresponding well. Each well should have a unique well-specific primer.
5. Incubate with rotation at room temperature for 30 minutes.
6. Incubate with rotation at 42°C for 1 hour, followed by 50°C for 1 hour.
7. Stop the reaction with the following steps:
  - a. Add 100  $\mu\text{L}$  TE-SDS to each reaction tube of the plate. Centrifuge plates 1000 rcf for 2 minutes at room temperature.
  - b. Without disturbing the BAG pellet, discard 85  $\mu\text{L}$  from **the top** of each tube.
  - c. Add 5 ml TE-SDS into solution basin. Transfer the remaining BAG solutions from the plate into the solution basin (~35  $\mu\text{L}$  per tube).
  - d. Transfer BAG solution from solution basin into a 15 mL conical tube. Centrifuge 300 rcf for 4 minutes. Discard supernatant.
  - e. Add 800  $\mu\text{L}$  STOP-10, pipet up and down, and transfer BAG solution into a 1.5 mL tube. Centrifuge 1000 rcf for 1.5 minutes. Discard supernatant.
  - f. Continue to exonuclease treatment or re-suspend in 800  $\mu\text{L}$  STOP-10 and store at 4°C.

-----Safe Stopping Point: Store BAGs in STOP-10 at 4°C overnight-----

## Exonuclease Treatment

1. If stored in STOP-10, centrifuge 1000 rcf for 1.5 minutes and discard supernatant.
2. Resuspend in STOP-1 for a wash. Centrifuge 1000 rcf for 1.5 minutes. Discard supernatant.
3. Resuspend in 1X Exonuclease I Reaction Buffer for a wash. Centrifuge 1000 rcf for 1.5 minutes. Discard supernatant.
4. Prepare the following exonuclease treatment solution; vortex to mix:

| Exonuclease Treatment Solution    | Volume ( $\mu\text{L}$ )            |
|-----------------------------------|-------------------------------------|
| H <sub>2</sub> O                  | 665                                 |
| 10X Exonuclease I Reaction buffer | 80                                  |
| Exonuclease I enzyme              | 40                                  |
| Ribonuclease H                    | 15                                  |
| <b>Total</b>                      | <b>800 <math>\mu\text{L}</math></b> |

5. Transfer 800  $\mu\text{L}$  Exonuclease Treatment Solution to the tube of BAGs; pipet to mix.
6. Incubate tubes with rotation at 37°C for 1 hour.
7. Centrifuge 1000 rcf for 1 minute. Discard supernatant.
8. Stop the reaction with the following washes:

- a. Resuspend in 800  $\mu$ L STOP-25. Centrifuge 1000 rcf for 1.5 minutes. Discard supernatant. Repeat for a total of two STOP-25 washes.
- b. Use the above wash method for one STOP-10 wash.

-----Safe Stopping Point: Store BAGs in STOP-10 at 4°C overnight-----

## Second Split-Pool

0. Note: If one desires to do 2 cycles of split-pool in total, skip this section and go ahead to the next section “Third Split-Pool” and use primers “Adapter3-BC2a-Adapter1-#RNAx”
1. Preparation:
  - a. If stored in STOP-10 overnight, centrifuge 1000 rcf for 1.5 minutes. Discard supernatant.
  - b. Resuspend in 800  $\mu$ L HBW for a wash. Centrifuge 1000 rcf for 1.5 minutes. Discard supernatant. Resuspend BAGs in 200  $\mu$ L HBW.
2. Denaturation
  - a. Prepare fresh Denaturation Solution: (Adapted from (Zilionis et al. 2017))
    - i. 9.7 mL H<sub>2</sub>O + 150  $\mu$ L 10 M NaOH + 150  $\mu$ L 30% (wt/wt) Brij-35
  - b. Add 1 mL Denaturation Solution to BAGs. Pipet up and down 5 times. Incubate 10 minutes at room temperature on rotator. Centrifuge 400 rcf for 2 minutes at room temperature. Discard supernatant.
  - c. Wash BAGs twice with Denaturation Solution
    - i. Add 1 mL Denaturation Solution to BAGs. Pipet up and down 5 times. Incubate 3 minutes at room temperature on rotator. Centrifuge 400 rcf for 2 minutes at room temperature. Discard supernatant.
3. Neutralization
  - a. Prepare Neutralization Solution
    - i. 7.7 mL H<sub>2</sub>O + 1 mL 1 M Tris (pH 8.0) + 1 mL 1 M NaCl + 200  $\mu$ L 0.5 M EDTA + 100  $\mu$ L 10% (vol/vol) Tween-20
  - b. Wash BAGs twice with Neutralization Buffer
    - i. Add 1 mL Neutralization Solution to BAGs. Pipet up and down 5 times. Incubate 3 minutes at room temperature on rotator. Centrifuge 400 rcf for 2 minutes at room temperature. Discard supernatant.
  - c. Wash BAGs once with HBW
    - i. Add 1 mL HBW to BAGs. Pipet up and down 5 times. Centrifuge 1000 rcf for 2 minutes. Discard supernatant.
  - d. Re-suspend BAGs in HBW (400  $\mu$ L total)
4. Preset thermocycler to 75°C and incubator to 57°C.
5. Prepare the following Isothermal Amplification Buffer (IAB) Mix; vortex to mix:

| IAB Mix          | Volume ( $\mu$ L)<br>for one 96-well plate | Volume ( $\mu$ L)<br>per well  |
|------------------|--------------------------------------------|--------------------------------|
| H <sub>2</sub> O | 1150.4                                     | ~12                            |
| 10x IABuffer     | 201.6                                      | 2.1                            |
| 10 mM dNTP       | 144                                        | 1.5                            |
| BAGs in HBW      | 400                                        | ~4.2                           |
| <b>Total:</b>    | <b>1896 <math>\mu</math>L</b>              | <b>19.75 <math>\mu</math>L</b> |

- a. Transfer 237  $\mu$ L IAB mix to each tube of 8-well PCR strip.

- b. Quickly transfer 19.75  $\mu\text{L}$  into each tube of a 96-well plate using a multipipette.
6. Add 1.25  $\mu\text{L}$  of the 96 different 100  $\mu\text{M}$  "Adapter2-BC2-Adapter1-#RNAx" primers into each corresponding well. Each well should have a unique primer.
7. Invert plate for 2 minutes. Then incubate the plate at 75°C for 5 minutes.
8. Incubate plate at 57°C with rotation for 20 minutes.
9. Prepare the following BST Master Mix on ice; pipet to mix:

| <b>BST Master Mix</b> | <b>Volume (<math>\mu\text{L}</math>)<br/>for one 96-well plate</b> | <i>Volume (<math>\mu\text{L}</math>)<br/>per well</i> |
|-----------------------|--------------------------------------------------------------------|-------------------------------------------------------|
| H <sub>2</sub> O      | 310                                                                | 3.1                                                   |
| 10x IABuffer          | 40                                                                 | 0.4                                                   |
| Bst2.0                | 50                                                                 | 0.5                                                   |
| <b>Total:</b>         | <b>400 <math>\mu\text{L}</math></b>                                | <b>4 <math>\mu\text{L}</math></b>                     |

- a. Transfer 50  $\mu\text{L}$  Bst Mix to each tube of 8-well PCR strip.
- b. Transfer 4  $\mu\text{L}$  into each tube of a 96-well plate using a multipipette. Pipet to mix.
10. Incubate at 57°C with rotation for 1 hr.
11. Stop the reaction with the following washes:
  - a. Add 100  $\mu\text{L}$  STOP-25 to each well of the plate. Centrifuge plates 1000 rcf for 2 minutes at room temperature.
  - b. Without disturbing the BAG pellet, discard 85  $\mu\text{L}$  from the top of each tube.
  - a. Add 5 mL STOP-25 into solution basin. Transfer the remaining BAG solutions from the plate into the solution basin (40  $\mu\text{L}$  per tube).
  - b. Transfer BAG solution from solution basin into a 15 mL conical. Centrifuge 300 rcf for 4 minutes. Discard supernatant.
  - c. Add 800  $\mu\text{L}$  STOP-10, pipet up and down, and transfer BAG solution into a 1.5 mL tube. Centrifuge 1000 rcf for 1.5 minutes. Discard supernatant.
12. Continue to third split-pool or resuspend BAGs in 800  $\mu\text{L}$  STOP-10 and store at 4°C.

-----Safe Stopping Point: Store BAGs in STOP-10 at 4°C overnight-----

### Third Split-Pool

1. If stored in STOP-10 overnight, centrifuge 1000 rcf for 1.5 minutes. Discard supernatant.
2. Resuspend in 800  $\mu\text{L}$  HBW for a wash. Centrifuge 1000 rcf for 1.5 minutes. Discard supernatant. Resuspend BAGs in 500  $\mu\text{L}$  HBW.
3. Use a microscope to count the number of BAGs per  $\mu\text{L}$ .
4. Prepare the following BAG mix; pipet to mix:

| <b>BAG Mix</b>   | <b>Volume (<math>\mu\text{L}</math>)</b> |
|------------------|------------------------------------------|
| BAGs in HBW      | x                                        |
| H <sub>2</sub> O | 720 - x                                  |
| Total            | 720 $\mu\text{L}$                        |

- a. Transfer 90  $\mu\text{L}$  BAG mix to each tube of 8-well PCR strip.
- b. Quickly transfer 7.5  $\mu\text{L}$  into each tube of a 96-well plate using a multipipette.
5. Add 1.5  $\mu\text{L}$  of 96 different 10  $\mu\text{M}$  "Adapter3-BC3-Adapter2-#RNAx" primers into each corresponding well. Each well should have a unique primer.
6. On ice, add 10  $\mu\text{L}$  KAPA HiFi HotStart ReadyMix to each tube of 96-well plate. Pipet to mix.
7. Place on thermal cycler for the following program:

**RNA: Linear Extension**

95°C 20 s

**8 cycles of:**

98°C 30 s

60°C 1 min

72°C 3 min

**Then:**

72°C 3 min

4°C infinite

8. On ice, add 1  $\mu$ L of 10  $\mu$ M “IS-short” primer. Use another set of tips to pipet to mix.
9. Place on thermal cycler for the following program:

**RNA: Exponential amplification**

95°C 2 minutes

**4 cycles of:**

98°C 20 s

60°C 1 min

72°C 3 min

**6 cycles of:**

98°C 20 s

62°C 20 s

72°C 3 min

**Then:**

72°C 5 min

4°C infinite

10. Purify sample twice with AMPure XP beads using the following guidelines:
  - a. First Pool: Pool 10  $\mu$ L from each of the eight tubes in each column into a new PCR tube.

(ex. 1A-1H) into a new PCR tube, as shown.

|    |   |   |   |   |   |   |   |   |    |    |    |
|----|---|---|---|---|---|---|---|---|----|----|----|
| 1A | 2 | 3 | 4 | 5 | 6 | 7 | 8 | 9 | 10 | 11 | 12 |
| B  |   |   |   |   |   |   |   |   |    |    |    |
| C  |   |   |   |   |   |   |   |   |    |    |    |
| D  |   |   |   |   |   |   |   |   |    |    |    |
| E  |   |   |   |   |   |   |   |   |    |    |    |
| F  |   |   |   |   |   |   |   |   |    |    |    |
| G  |   |   |   |   |   |   |   |   |    |    |    |
| H  |   |   |   |   |   |   |   |   |    |    |    |

|   |   |   |   |   |   |   |   |   |    |    |    |
|---|---|---|---|---|---|---|---|---|----|----|----|
| 1 | 2 | 3 | 4 | 5 | 6 | 7 | 8 | 9 | 10 | 11 | 12 |
|---|---|---|---|---|---|---|---|---|----|----|----|

(After pool: 80  $\mu$ L each)

- b. First Purification: Purify these 12 samples with 0.7x ratio (56  $\mu$ L) of AMPure XP beads, and elute with 15  $\mu$ L of H<sub>2</sub>O using AMPure XP protocol.
    - c. Second Pool

Pool 14 ul from six tubes into one tube.

|   |   |   |   |   |   |   |   |   |    |    |    |
|---|---|---|---|---|---|---|---|---|----|----|----|
| 1 | 2 | 3 | 4 | 5 | 6 | 7 | 8 | 9 | 10 | 11 | 12 |
|---|---|---|---|---|---|---|---|---|----|----|----|

|   |   |
|---|---|
| 1 | 2 |
|---|---|

(After pool: 84  $\mu$ L each)

- d. Second Purification: Purify these two samples with another 0.7x ratio (59  $\mu$ L) of AMPure XP beads, and elute with 15  $\mu$ L H<sub>2</sub>O using AMPure XP protocol.
11. Run a High Sensitivity DNA Chip on an Agilent Bioanalyzer.

## Tagmentation of cDNA and Making Final Sequencing Library

1. Using Bioanalyzer data, combine 1.5 ng of cDNA with H<sub>2</sub>O in a total volume of 5  $\mu$ L. Add 10  $\mu$ L of Nextera TD buffer
2. On ice, add 5  $\mu$ L of Amplicon Tagment enzyme. Pipet to mix.
3. Incubate sample at 55°C for 4 minutes.
4. Quickly add 5  $\mu$ L of Neutralization Buffer. Pipet to mix.
5. Incubate at room temperature for 5 minutes
6. On ice, combine the following; pipet to mix:

| Final PCR Reaction Mix        | Volume (in $\mu$ L)         |
|-------------------------------|-----------------------------|
| H <sub>2</sub> O              | 8                           |
| 10 $\mu$ M Nextera N70x oligo | 1                           |
| 10 $\mu$ M "P5-SAM" primer    | 1                           |
| Nextera PCR mix               | 15                          |
| <b>Total</b>                  | <b>25 <math>\mu</math>L</b> |

12. Place on thermal cycler for the following program:

### **Final PCR gel**

95°C 30s

#### **12 cycles of:**

95°C 10 s

55°C 30 s

72°C 30 s

#### **Then:**

72°C 5 min

4°C infinite

13. Purify sample with 0.8x ratio (40  $\mu$ L) of Ampure XP Beads, and elute with 15  $\mu$ L H<sub>2</sub>O using AMPure XP protocol.
14. Run a High Sensitivity DNA Chip on an Agilent Bioanalyzer to check final concentration of sample.
15. The library should have an average bp size of 400-500bp.
16. Sequence your sample using Illumina platform with custom Read1 sequencing primer "Read1-SAM".

# Barcode Sequences

## First Split-Pool Barcodes

| Oligo name             | Sequence                                  |
|------------------------|-------------------------------------------|
| Adapter1-BC1-vt-#RNA1  | AGTGGAAAAGGAAGGTGGT TATTAT NNNNNN rGrGrG  |
| Adapter1-BC1-vt-#RNA2  | AGTGGAAAAGGAAGGTGGT CTATGG NNNNNN rGrGrG  |
| Adapter1-BC1-vt-#RNA3  | AGTGGAAAAGGAAGGTGGT AAAACG NNNNNN rGrGrG  |
| Adapter1-BC1-vt-#RNA4  | AGTGGAAAAGGAAGGTGGT CAAACA NNNNNN rGrGrG  |
| Adapter1-BC1-vt-#RNA5  | AGTGGAAAAGGAAGGTGGT TATCGT NNNNNN rGrGrG  |
| Adapter1-BC1-vt-#RNA6  | AGTGGAAAAGGAAGGTGGT ACTAAG NNNNNN rGrGrG  |
| Adapter1-BC1-vt-#RNA7  | AGTGGAAAAGGAAGGTGGT GCATCT NNNNNN rGrGrG  |
| Adapter1-BC1-vt-#RNA8  | AGTGGAAAAGGAAGGTGGT AGTTTG NNNNNN rGrGrG  |
| Adapter1-BC1-vt-#RNA9  | AGTGGAAAAGGAAGGTGGT CGATTT NNNNNN rGrGrG  |
| Adapter1-BC1-vt-#RNA10 | AGTGGAAAAGGAAGGTGGT ATCAGC NNNNNN rGrGrG  |
| Adapter1-BC1-vt-#RNA11 | AGTGGAAAAGGAAGGTGGT AACCAAG NNNNNN rGrGrG |
| Adapter1-BC1-vt-#RNA12 | AGTGGAAAAGGAAGGTGGT GAAGTT NNNNNN rGrGrG  |
| Adapter1-BC1-vt-#RNA13 | AGTGGAAAAGGAAGGTGGT GGTCTA NNNNNN rGrGrG  |
| Adapter1-BC1-vt-#RNA14 | AGTGGAAAAGGAAGGTGGT GACTAT NNNNNN rGrGrG  |
| Adapter1-BC1-vt-#RNA15 | AGTGGAAAAGGAAGGTGGT GTATCA NNNNNN rGrGrG  |
| Adapter1-BC1-vt-#RNA16 | AGTGGAAAAGGAAGGTGGT TGCATA NNNNNN rGrGrG  |
| Adapter1-BC1-vt-#RNA17 | AGTGGAAAAGGAAGGTGGT TAATCA NNNNNN rGrGrG  |
| Adapter1-BC1-vt-#RNA18 | AGTGGAAAAGGAAGGTGGT TGGTAT NNNNNN rGrGrG  |
| Adapter1-BC1-vt-#RNA19 | AGTGGAAAAGGAAGGTGGT ATGTGT NNNNNN rGrGrG  |
| Adapter1-BC1-vt-#RNA20 | AGTGGAAAAGGAAGGTGGT TACTGG NNNNNN rGrGrG  |
| Adapter1-BC1-vt-#RNA21 | AGTGGAAAAGGAAGGTGGT AGCTGA NNNNNN rGrGrG  |
| Adapter1-BC1-vt-#RNA22 | AGTGGAAAAGGAAGGTGGT TAAATG NNNNNN rGrGrG  |
| Adapter1-BC1-vt-#RNA23 | AGTGGAAAAGGAAGGTGGT CTGAAC NNNNNN rGrGrG  |
| Adapter1-BC1-vt-#RNA24 | AGTGGAAAAGGAAGGTGGT TAATGC NNNNNN rGrGrG  |
| Adapter1-BC1-vt-#RNA25 | AGTGGAAAAGGAAGGTGGT TAACTA NNNNNN rGrGrG  |
| Adapter1-BC1-vt-#RNA26 | AGTGGAAAAGGAAGGTGGT CGAAAA NNNNNN rGrGrG  |
| Adapter1-BC1-vt-#RNA27 | AGTGGAAAAGGAAGGTGGT ACGAAT NNNNNN rGrGrG  |
| Adapter1-BC1-vt-#RNA28 | AGTGGAAAAGGAAGGTGGT ATGACG NNNNNN rGrGrG  |
| Adapter1-BC1-vt-#RNA29 | AGTGGAAAAGGAAGGTGGT AGGAGT NNNNNN rGrGrG  |
| Adapter1-BC1-vt-#RNA30 | AGTGGAAAAGGAAGGTGGT CTAGAC NNNNNN rGrGrG  |
| Adapter1-BC1-vt-#RNA31 | AGTGGAAAAGGAAGGTGGT TAGATT NNNNNN rGrGrG  |
| Adapter1-BC1-vt-#RNA32 | AGTGGAAAAGGAAGGTGGT TATGTC NNNNNN rGrGrG  |
| Adapter1-BC1-vt-#RNA33 | AGTGGAAAAGGAAGGTGGT CGGATA NNNNNN rGrGrG  |
| Adapter1-BC1-vt-#RNA34 | AGTGGAAAAGGAAGGTGGT ACGTTT NNNNNN rGrGrG  |
| Adapter1-BC1-vt-#RNA35 | AGTGGAAAAGGAAGGTGGT ACTTGT NNNNNN rGrGrG  |
| Adapter1-BC1-vt-#RNA36 | AGTGGAAAAGGAAGGTGGT GAGTAC NNNNNN rGrGrG  |
| Adapter1-BC1-vt-#RNA37 | AGTGGAAAAGGAAGGTGGT ATCTAA NNNNNN rGrGrG  |
| Adapter1-BC1-vt-#RNA38 | AGTGGAAAAGGAAGGTGGT GTTTGC NNNNNN rGrGrG  |
| Adapter1-BC1-vt-#RNA39 | AGTGGAAAAGGAAGGTGGT AGGATG NNNNNN rGrGrG  |
| Adapter1-BC1-vt-#RNA40 | AGTGGAAAAGGAAGGTGGT CTAGCA NNNNNN rGrGrG  |
| Adapter1-BC1-vt-#RNA41 | AGTGGAAAAGGAAGGTGGT AAACGT NNNNNN rGrGrG  |
| Adapter1-BC1-vt-#RNA42 | AGTGGAAAAGGAAGGTGGT GGT CAT NNNNNN rGrGrG |
| Adapter1-BC1-vt-#RNA43 | AGTGGAAAAGGAAGGTGGT TCAAAG NNNNNN rGrGrG  |
| Adapter1-BC1-vt-#RNA44 | AGTGGAAAAGGAAGGTGGT AAAGCA NNNNNN rGrGrG  |
| Adapter1-BC1-vt-#RNA45 | AGTGGAAAAGGAAGGTGGT AGTGAC NNNNNN rGrGrG  |
| Adapter1-BC1-vt-#RNA46 | AGTGGAAAAGGAAGGTGGT GTAGTC NNNNNN rGrGrG  |
| Adapter1-BC1-vt-#RNA47 | AGTGGAAAAGGAAGGTGGT CATGAG NNNNNN rGrGrG  |
| Adapter1-BC1-vt-#RNA48 | AGTGGAAAAGGAAGGTGGT GACTTG NNNNNN rGrGrG  |
| Adapter1-BC1-vt-#RNA49 | AGTGGAAAAGGAAGGTGGT ACAATC NNNNNN rGrGrG  |
| Adapter1-BC1-vt-#RNA50 | AGTGGAAAAGGAAGGTGGT ATTATG NNNNNN rGrGrG  |
| Adapter1-BC1-vt-#RNA51 | AGTGGAAAAGGAAGGTGGT GGATTG NNNNNN rGrGrG  |

|                        |                                          |
|------------------------|------------------------------------------|
| Adapter1-BC1-vt-#RNA52 | AGTGGAAAAGGAAGGTGGT TAGGCA NNNNNN rGrGrG |
| Adapter1-BC1-vt-#RNA53 | AGTGGAAAAGGAAGGTGGT TACGTG NNNNNN rGrGrG |
| Adapter1-BC1-vt-#RNA54 | AGTGGAAAAGGAAGGTGGT ATAGGT NNNNNN rGrGrG |
| Adapter1-BC1-vt-#RNA55 | AGTGGAAAAGGAAGGTGGT TTAGAT NNNNNN rGrGrG |
| Adapter1-BC1-vt-#RNA56 | AGTGGAAAAGGAAGGTGGT TCGGAT NNNNNN rGrGrG |
| Adapter1-BC1-vt-#RNA57 | AGTGGAAAAGGAAGGTGGT TCTAGC NNNNNN rGrGrG |
| Adapter1-BC1-vt-#RNA58 | AGTGGAAAAGGAAGGTGGT TCTGAC NNNNNN rGrGrG |
| Adapter1-BC1-vt-#RNA59 | AGTGGAAAAGGAAGGTGGT GGAAAC NNNNNN rGrGrG |
| Adapter1-BC1-vt-#RNA60 | AGTGGAAAAGGAAGGTGGT GAGGAT NNNNNN rGrGrG |
| Adapter1-BC1-vt-#RNA61 | AGTGGAAAAGGAAGGTGGT CAATTC NNNNNN rGrGrG |
| Adapter1-BC1-vt-#RNA62 | AGTGGAAAAGGAAGGTGGT TCGTTA NNNNNN rGrGrG |
| Adapter1-BC1-vt-#RNA63 | AGTGGAAAAGGAAGGTGGT AGGACA NNNNNN rGrGrG |
| Adapter1-BC1-vt-#RNA64 | AGTGGAAAAGGAAGGTGGT TACAGT NNNNNN rGrGrG |
| Adapter1-BC1-vt-#RNA65 | AGTGGAAAAGGAAGGTGGT TTACGG NNNNNN rGrGrG |
| Adapter1-BC1-vt-#RNA66 | AGTGGAAAAGGAAGGTGGT TACGGA NNNNNN rGrGrG |
| Adapter1-BC1-vt-#RNA67 | AGTGGAAAAGGAAGGTGGT TATACT NNNNNN rGrGrG |
| Adapter1-BC1-vt-#RNA68 | AGTGGAAAAGGAAGGTGGT GTAAGG NNNNNN rGrGrG |
| Adapter1-BC1-vt-#RNA69 | AGTGGAAAAGGAAGGTGGT AGTAGA NNNNNN rGrGrG |
| Adapter1-BC1-vt-#RNA70 | AGTGGAAAAGGAAGGTGGT TTCGTA NNNNNN rGrGrG |
| Adapter1-BC1-vt-#RNA71 | AGTGGAAAAGGAAGGTGGT AATAGG NNNNNN rGrGrG |
| Adapter1-BC1-vt-#RNA72 | AGTGGAAAAGGAAGGTGGT CTAGTT NNNNNN rGrGrG |
| Adapter1-BC1-vt-#RNA73 | AGTGGAAAAGGAAGGTGGT AAGTCG NNNNNN rGrGrG |
| Adapter1-BC1-vt-#RNA74 | AGTGGAAAAGGAAGGTGGT CTAAGT NNNNNN rGrGrG |
| Adapter1-BC1-vt-#RNA75 | AGTGGAAAAGGAAGGTGGT CAGAGT NNNNNN rGrGrG |
| Adapter1-BC1-vt-#RNA76 | AGTGGAAAAGGAAGGTGGT TAGGGT NNNNNN rGrGrG |
| Adapter1-BC1-vt-#RNA77 | AGTGGAAAAGGAAGGTGGT GAACAT NNNNNN rGrGrG |
| Adapter1-BC1-vt-#RNA78 | AGTGGAAAAGGAAGGTGGT CTTGGT NNNNNN rGrGrG |
| Adapter1-BC1-vt-#RNA79 | AGTGGAAAAGGAAGGTGGT ATTCGT NNNNNN rGrGrG |
| Adapter1-BC1-vt-#RNA80 | AGTGGAAAAGGAAGGTGGT AGGTTC NNNNNN rGrGrG |
| Adapter1-BC1-vt-#RNA81 | AGTGGAAAAGGAAGGTGGT GAATGG NNNNNN rGrGrG |
| Adapter1-BC1-vt-#RNA82 | AGTGGAAAAGGAAGGTGGT CAAAAG NNNNNN rGrGrG |
| Adapter1-BC1-vt-#RNA83 | AGTGGAAAAGGAAGGTGGT AATGCG NNNNNN rGrGrG |
| Adapter1-BC1-vt-#RNA84 | AGTGGAAAAGGAAGGTGGT TTCAAT NNNNNN rGrGrG |
| Adapter1-BC1-vt-#RNA85 | AGTGGAAAAGGAAGGTGGT GTTAAA NNNNNN rGrGrG |
| Adapter1-BC1-vt-#RNA86 | AGTGGAAAAGGAAGGTGGT TAGTAA NNNNNN rGrGrG |
| Adapter1-BC1-vt-#RNA87 | AGTGGAAAAGGAAGGTGGT ATTGTT NNNNNN rGrGrG |
| Adapter1-BC1-vt-#RNA88 | AGTGGAAAAGGAAGGTGGT TCATTC NNNNNN rGrGrG |
| Adapter1-BC1-vt-#RNA89 | AGTGGAAAAGGAAGGTGGT ATATAC NNNNNN rGrGrG |
| Adapter1-BC1-vt-#RNA90 | AGTGGAAAAGGAAGGTGGT CAACGA NNNNNN rGrGrG |
| Adapter1-BC1-vt-#RNA91 | AGTGGAAAAGGAAGGTGGT AATTCT NNNNNN rGrGrG |
| Adapter1-BC1-vt-#RNA92 | AGTGGAAAAGGAAGGTGGT AAGAAC NNNNNN rGrGrG |
| Adapter1-BC1-vt-#RNA93 | AGTGGAAAAGGAAGGTGGT TGTTGC NNNNNN rGrGrG |
| Adapter1-BC1-vt-#RNA94 | AGTGGAAAAGGAAGGTGGT AACAGA NNNNNN rGrGrG |
| Adapter1-BC1-vt-#RNA95 | AGTGGAAAAGGAAGGTGGT GGAATA NNNNNN rGrGrG |
| Adapter1-BC1-vt-#RNA96 | AGTGGAAAAGGAAGGTGGT ATATTA NNNNNN rGrGrG |



## Second Split-Pool Barcodes

| Oligo name                   | Sequence                                               |
|------------------------------|--------------------------------------------------------|
| Adapter2-BC2-Adapter1-#RNA1  | GACCGACTCGCATTACCCTATTCACCAAGTGGAAAAGGAAGGTGG/3InvdT/  |
| Adapter2-BC2-Adapter1-#RNA2  | GACCGACTCGCATTACCCTATCCAGTAAGTGGAAAAGGAAGGTGG/3InvdT/  |
| Adapter2-BC2-Adapter1-#RNA3  | GACCGACTCGCATTACCCTATTCCTAAAAGTGGAAAAGGAAGGTGG/3InvdT/ |
| Adapter2-BC2-Adapter1-#RNA4  | GACCGACTCGCATTACCCTATCCATTCAGTGGAAAAGGAAGGTGG/3InvdT/  |
| Adapter2-BC2-Adapter1-#RNA5  | GACCGACTCGCATTACCCTATTCACCAGTGGAAAAGGAAGGTGG/3InvdT/   |
| Adapter2-BC2-Adapter1-#RNA6  | GACCGACTCGCATTACCCTATCTGCAAAGTGGAAAAGGAAGGTGG/3InvdT/  |
| Adapter2-BC2-Adapter1-#RNA7  | GACCGACTCGCATTACCCTATGAAATAAGTGGAAAAGGAAGGTGG/3InvdT/  |
| Adapter2-BC2-Adapter1-#RNA8  | GACCGACTCGCATTACCCTATAGGTATAGTGGAAAAGGAAGGTGG/3InvdT/  |
| Adapter2-BC2-Adapter1-#RNA9  | GACCGACTCGCATTACCCTATACTCTAAGTGGAAAAGGAAGGTGG/3InvdT/  |
| Adapter2-BC2-Adapter1-#RNA10 | GACCGACTCGCATTACCCTATCCCATAGTGGAAAAGGAAGGTGG/3InvdT/   |
| Adapter2-BC2-Adapter1-#RNA11 | GACCGACTCGCATTACCCTATGGTTTTAGTGGAAAAGGAAGGTGG/3InvdT/  |
| Adapter2-BC2-Adapter1-#RNA12 | GACCGACTCGCATTACCCTATCTGTAAGTGGAAAAGGAAGGTGG/3InvdT/   |
| Adapter2-BC2-Adapter1-#RNA13 | GACCGACTCGCATTACCCTATAGTCACAGTGGAAAAGGAAGGTGG/3InvdT/  |
| Adapter2-BC2-Adapter1-#RNA14 | GACCGACTCGCATTACCCTATAACACAAGTGGAAAAGGAAGGTGG/3InvdT/  |
| Adapter2-BC2-Adapter1-#RNA15 | GACCGACTCGCATTACCCTATTGTATTAGTGGAAAAGGAAGGTGG/3InvdT/  |
| Adapter2-BC2-Adapter1-#RNA16 | GACCGACTCGCATTACCCTATTTACAAAGTGGAAAAGGAAGGTGG/3InvdT/  |
| Adapter2-BC2-Adapter1-#RNA17 | GACCGACTCGCATTACCCTATATATTCAGTGGAAAAGGAAGGTGG/3InvdT/  |
| Adapter2-BC2-Adapter1-#RNA18 | GACCGACTCGCATTACCCTATGCCTATAGTGGAAAAGGAAGGTGG/3InvdT/  |
| Adapter2-BC2-Adapter1-#RNA19 | GACCGACTCGCATTACCCTATAGCGAAGTGGAAAAGGAAGGTGG/3InvdT/   |
| Adapter2-BC2-Adapter1-#RNA20 | GACCGACTCGCATTACCCTATAAACCTAGTGGAAAAGGAAGGTGG/3InvdT/  |
| Adapter2-BC2-Adapter1-#RNA21 | GACCGACTCGCATTACCCTATAACAACAGTGGAAAAGGAAGGTGG/3InvdT/  |
| Adapter2-BC2-Adapter1-#RNA22 | GACCGACTCGCATTACCCTATCTTATTAGTGGAAAAGGAAGGTGG/3InvdT/  |
| Adapter2-BC2-Adapter1-#RNA23 | GACCGACTCGCATTACCCTATGACTGAAGTGGAAAAGGAAGGTGG/3InvdT/  |
| Adapter2-BC2-Adapter1-#RNA24 | GACCGACTCGCATTACCCTATCCTAACAGTGGAAAAGGAAGGTGG/3InvdT/  |
| Adapter2-BC2-Adapter1-#RNA25 | GACCGACTCGCATTACCCTATTTTCTCAGTGGAAAAGGAAGGTGG/3InvdT/  |
| Adapter2-BC2-Adapter1-#RNA26 | GACCGACTCGCATTACCCTATGAGAATAGTGGAAAAGGAAGGTGG/3InvdT/  |
| Adapter2-BC2-Adapter1-#RNA27 | GACCGACTCGCATTACCCTATATGTAAAGTGGAAAAGGAAGGTGG/3InvdT/  |
| Adapter2-BC2-Adapter1-#RNA28 | GACCGACTCGCATTACCCTATATTTATAGTGGAAAAGGAAGGTGG/3InvdT/  |
| Adapter2-BC2-Adapter1-#RNA29 | GACCGACTCGCATTACCCTATGCGATAAGTGGAAAAGGAAGGTGG/3InvdT/  |
| Adapter2-BC2-Adapter1-#RNA30 | GACCGACTCGCATTACCCTATATGAACAGTGGAAAAGGAAGGTGG/3InvdT/  |
| Adapter2-BC2-Adapter1-#RNA31 | GACCGACTCGCATTACCCTATAATGTGAGTGGAAAAGGAAGGTGG/3InvdT/  |
| Adapter2-BC2-Adapter1-#RNA32 | GACCGACTCGCATTACCCTATTCGCTTAGTGGAAAAGGAAGGTGG/3InvdT/  |
| Adapter2-BC2-Adapter1-#RNA33 | GACCGACTCGCATTACCCTATAACGGTAGTGGAAAAGGAAGGTGG/3InvdT/  |
| Adapter2-BC2-Adapter1-#RNA34 | GACCGACTCGCATTACCCTATATAGACAGTGGAAAAGGAAGGTGG/3InvdT/  |
| Adapter2-BC2-Adapter1-#RNA35 | GACCGACTCGCATTACCCTATAATACTAGTGGAAAAGGAAGGTGG/3InvdT/  |
| Adapter2-BC2-Adapter1-#RNA36 | GACCGACTCGCATTACCCTATGAACCAAGTGGAAAAGGAAGGTGG/3InvdT/  |
| Adapter2-BC2-Adapter1-#RNA37 | GACCGACTCGCATTACCCTATGGACATAGTGGAAAAGGAAGGTGG/3InvdT/  |
| Adapter2-BC2-Adapter1-#RNA38 | GACCGACTCGCATTACCCTATGCAAATAGTGGAAAAGGAAGGTGG/3InvdT/  |
| Adapter2-BC2-Adapter1-#RNA39 | GACCGACTCGCATTACCCTATATTTGAGTGGAAAAGGAAGGTGG/3InvdT/   |
| Adapter2-BC2-Adapter1-#RNA40 | GACCGACTCGCATTACCCTATCGCATTAGTGGAAAAGGAAGGTGG/3InvdT/  |
| Adapter2-BC2-Adapter1-#RNA41 | GACCGACTCGCATTACCCTATAGCTCAAGTGGAAAAGGAAGGTGG/3InvdT/  |
| Adapter2-BC2-Adapter1-#RNA42 | GACCGACTCGCATTACCCTATTAAGCTAGTGGAAAAGGAAGGTGG/3InvdT/  |
| Adapter2-BC2-Adapter1-#RNA43 | GACCGACTCGCATTACCCTATCGTACAAGTGGAAAAGGAAGGTGG/3InvdT/  |
| Adapter2-BC2-Adapter1-#RNA44 | GACCGACTCGCATTACCCTATCTGAATAGTGGAAAAGGAAGGTGG/3InvdT/  |
| Adapter2-BC2-Adapter1-#RNA45 | GACCGACTCGCATTACCCTATCCCAATAGTGGAAAAGGAAGGTGG/3InvdT/  |
| Adapter2-BC2-Adapter1-#RNA46 | GACCGACTCGCATTACCCTATCCTCAAAGTGGAAAAGGAAGGTGG/3InvdT/  |
| Adapter2-BC2-Adapter1-#RNA47 | GACCGACTCGCATTACCCTATGCAATCAGTGGAAAAGGAAGGTGG/3InvdT/  |
| Adapter2-BC2-Adapter1-#RNA48 | GACCGACTCGCATTACCCTATGAATCCAGTGGAAAAGGAAGGTGG/3InvdT/  |
| Adapter2-BC2-Adapter1-#RNA49 | GACCGACTCGCATTACCCTATAAGCCAAGTGGAAAAGGAAGGTGG/3InvdT/  |
| Adapter2-BC2-Adapter1-#RNA50 | GACCGACTCGCATTACCCTATGCATTAAGTGGAAAAGGAAGGTGG/3InvdT/  |
| Adapter2-BC2-Adapter1-#RNA51 | GACCGACTCGCATTACCCTATGAACTAGTGGAAAAGGAAGGTGG/3InvdT/   |
| Adapter2-BC2-Adapter1-#RNA52 | GACCGACTCGCATTACCCTATACTTACAGTGGAAAAGGAAGGTGG/3InvdT/  |

|                              |                                                        |
|------------------------------|--------------------------------------------------------|
| Adapter2-BC2-Adapter1-#RNA53 | GACCGACTCGCATTACCCTATAAAGTGAAGTGGAAAAGGAAGGTGG/3InvdT/ |
| Adapter2-BC2-Adapter1-#RNA54 | GACCGACTCGCATTACCCTATAAACTAAGTGGAAAAGGAAGGTGG/3InvdT/  |
| Adapter2-BC2-Adapter1-#RNA55 | GACCGACTCGCATTACCCTATGAGTTAAGTGGAAAAGGAAGGTGG/3InvdT/  |
| Adapter2-BC2-Adapter1-#RNA56 | GACCGACTCGCATTACCCTATAATCAAAGTGGAAAAGGAAGGTGG/3InvdT/  |
| Adapter2-BC2-Adapter1-#RNA57 | GACCGACTCGCATTACCCTATCTGTGAAGTGGAAAAGGAAGGTGG/3InvdT/  |
| Adapter2-BC2-Adapter1-#RNA58 | GACCGACTCGCATTACCCTATAAAGTTAGTGGAAAAGGAAGGTGG/3InvdT/  |
| Adapter2-BC2-Adapter1-#RNA59 | GACCGACTCGCATTACCCTATAACTAAAGTGGAAAAGGAAGGTGG/3InvdT/  |
| Adapter2-BC2-Adapter1-#RNA60 | GACCGACTCGCATTACCCTATTTACCTAGTGGAAAAGGAAGGTGG/3InvdT/  |
| Adapter2-BC2-Adapter1-#RNA61 | GACCGACTCGCATTACCCTATGGATTAGTGGAAAAGGAAGGTGG/3InvdT/   |
| Adapter2-BC2-Adapter1-#RNA62 | GACCGACTCGCATTACCCTATAGAATTAGTGGAAAAGGAAGGTGG/3InvdT/  |
| Adapter2-BC2-Adapter1-#RNA63 | GACCGACTCGCATTACCCTATTTTGGTAGTGGAAAAGGAAGGTGG/3InvdT/  |
| Adapter2-BC2-Adapter1-#RNA64 | GACCGACTCGCATTACCCTATAACTCCAGTGGAAAAGGAAGGTGG/3InvdT/  |
| Adapter2-BC2-Adapter1-#RNA65 | GACCGACTCGCATTACCCTATAACCATAGTGGAAAAGGAAGGTGG/3InvdT/  |
| Adapter2-BC2-Adapter1-#RNA66 | GACCGACTCGCATTACCCTATATAGTAAGTGGAAAAGGAAGGTGG/3InvdT/  |
| Adapter2-BC2-Adapter1-#RNA67 | GACCGACTCGCATTACCCTATAAGTTCAGTGGAAAAGGAAGGTGG/3InvdT/  |
| Adapter2-BC2-Adapter1-#RNA68 | GACCGACTCGCATTACCCTATGAATAAAGTGGAAAAGGAAGGTGG/3InvdT/  |
| Adapter2-BC2-Adapter1-#RNA69 | GACCGACTCGCATTACCCTATAATCCCAGTGGAAAAGGAAGGTGG/3InvdT/  |
| Adapter2-BC2-Adapter1-#RNA70 | GACCGACTCGCATTACCCTATCCATGAAGTGGAAAAGGAAGGTGG/3InvdT/  |
| Adapter2-BC2-Adapter1-#RNA71 | GACCGACTCGCATTACCCTATACAATAAGTGGAAAAGGAAGGTGG/3InvdT/  |
| Adapter2-BC2-Adapter1-#RNA72 | GACCGACTCGCATTACCCTATTCAGACAGTGGAAAAGGAAGGTGG/3InvdT/  |
| Adapter2-BC2-Adapter1-#RNA73 | GACCGACTCGCATTACCCTATATTTTAAAGTGGAAAAGGAAGGTGG/3InvdT/ |
| Adapter2-BC2-Adapter1-#RNA74 | GACCGACTCGCATTACCCTATGACTTTAGTGGAAAAGGAAGGTGG/3InvdT/  |
| Adapter2-BC2-Adapter1-#RNA75 | GACCGACTCGCATTACCCTATATGTTTAGTGGAAAAGGAAGGTGG/3InvdT/  |
| Adapter2-BC2-Adapter1-#RNA76 | GACCGACTCGCATTACCCTATAGACAAAGTGGAAAAGGAAGGTGG/3InvdT/  |
| Adapter2-BC2-Adapter1-#RNA77 | GACCGACTCGCATTACCCTATAAACGCAGTGGAAAAGGAAGGTGG/3InvdT/  |
| Adapter2-BC2-Adapter1-#RNA78 | GACCGACTCGCATTACCCTATATTGAAAGTGGAAAAGGAAGGTGG/3InvdT/  |
| Adapter2-BC2-Adapter1-#RNA79 | GACCGACTCGCATTACCCTATTTACGCAGTGGAAAAGGAAGGTGG/3InvdT/  |
| Adapter2-BC2-Adapter1-#RNA80 | GACCGACTCGCATTACCCTATCCTACTAGTGGAAAAGGAAGGTGG/3InvdT/  |
| Adapter2-BC2-Adapter1-#RNA81 | GACCGACTCGCATTACCCTATGCAGTTAGTGGAAAAGGAAGGTGG/3InvdT/  |
| Adapter2-BC2-Adapter1-#RNA82 | GACCGACTCGCATTACCCTATCTTTCAAGTGGAAAAGGAAGGTGG/3InvdT/  |
| Adapter2-BC2-Adapter1-#RNA83 | GACCGACTCGCATTACCCTATCGTTACAGTGGAAAAGGAAGGTGG/3InvdT/  |
| Adapter2-BC2-Adapter1-#RNA84 | GACCGACTCGCATTACCCTATAGTTTTCAGTGGAAAAGGAAGGTGG/3InvdT/ |
| Adapter2-BC2-Adapter1-#RNA85 | GACCGACTCGCATTACCCTATAGAAACAGTGGAAAAGGAAGGTGG/3InvdT/  |
| Adapter2-BC2-Adapter1-#RNA86 | GACCGACTCGCATTACCCTATAAATATAGTGGAAAAGGAAGGTGG/3InvdT/  |
| Adapter2-BC2-Adapter1-#RNA87 | GACCGACTCGCATTACCCTATTATCGCAGTGGAAAAGGAAGGTGG/3InvdT/  |
| Adapter2-BC2-Adapter1-#RNA88 | GACCGACTCGCATTACCCTATCGATTAAGTGGAAAAGGAAGGTGG/3InvdT/  |
| Adapter2-BC2-Adapter1-#RNA89 | GACCGACTCGCATTACCCTATAGGACTAGTGGAAAAGGAAGGTGG/3InvdT/  |
| Adapter2-BC2-Adapter1-#RNA90 | GACCGACTCGCATTACCCTATCCAAGTAGTGGAAAAGGAAGGTGG/3InvdT/  |
| Adapter2-BC2-Adapter1-#RNA91 | GACCGACTCGCATTACCCTATATGGGTAGTGGAAAAGGAAGGTGG/3InvdT/  |
| Adapter2-BC2-Adapter1-#RNA92 | GACCGACTCGCATTACCCTATTTTAAAGTGGAAAAGGAAGGTGG/3InvdT/   |
| Adapter2-BC2-Adapter1-#RNA93 | GACCGACTCGCATTACCCTATAACGTAAGTGGAAAAGGAAGGTGG/3InvdT/  |
| Adapter2-BC2-Adapter1-#RNA94 | GACCGACTCGCATTACCCTATTCAGGTAGTGGAAAAGGAAGGTGG/3InvdT/  |
| Adapter2-BC2-Adapter1-#RNA95 | GACCGACTCGCATTACCCTATAATTCAAGTGGAAAAGGAAGGTGG/3InvdT/  |
| Adapter2-BC2-Adapter1-#RNA96 | GACCGACTCGCATTACCCTATACATGCAGTGGAAAAGGAAGGTGG/3InvdT/  |

## Third Split-Pool Barcodes

| Oligo name                   | Sequence                                                |
|------------------------------|---------------------------------------------------------|
| Adapter3-BC3-Adapter2-#RNA1  | AAGGCTCTTGACACGAAGGATAG TACCGTNNGACCGACTCGCATTACCCT*A*T |
| Adapter3-BC3-Adapter2-#RNA2  | AAGGCTCTTGACACGAAGGATAG CCATTTNNGACCGACTCGCATTACCCT*A*T |
| Adapter3-BC3-Adapter2-#RNA3  | AAGGCTCTTGACACGAAGGATAG TCTTTTNNGACCGACTCGCATTACCCT*A*T |
| Adapter3-BC3-Adapter2-#RNA4  | AAGGCTCTTGACACGAAGGATAG AAACATNNGACCGACTCGCATTACCCT*A*T |
| Adapter3-BC3-Adapter2-#RNA5  | AAGGCTCTTGACACGAAGGATAG GTTTGGNNGACCGACTCGCATTACCCT*A*T |
| Adapter3-BC3-Adapter2-#RNA6  | AAGGCTCTTGACACGAAGGATAG CAAACTNNGACCGACTCGCATTACCCT*A*T |
| Adapter3-BC3-Adapter2-#RNA7  | AAGGCTCTTGACACGAAGGATAG ACCTATNNGACCGACTCGCATTACCCT*A*T |
| Adapter3-BC3-Adapter2-#RNA8  | AAGGCTCTTGACACGAAGGATAG TCACTTNNGACCGACTCGCATTACCCT*A*T |
| Adapter3-BC3-Adapter2-#RNA9  | AAGGCTCTTGACACGAAGGATAG AGTTGTNNGACCGACTCGCATTACCCT*A*T |
| Adapter3-BC3-Adapter2-#RNA10 | AAGGCTCTTGACACGAAGGATAG CTTGGANNACCGACTCGCATTACCCT*A*T  |
| Adapter3-BC3-Adapter2-#RNA11 | AAGGCTCTTGACACGAAGGATAG CTGGATNNGACCGACTCGCATTACCCT*A*T |
| Adapter3-BC3-Adapter2-#RNA12 | AAGGCTCTTGACACGAAGGATAG TTCACGNNGACCGACTCGCATTACCCT*A*T |
| Adapter3-BC3-Adapter2-#RNA13 | AAGGCTCTTGACACGAAGGATAG CTCTATNNGACCGACTCGCATTACCCT*A*T |
| Adapter3-BC3-Adapter2-#RNA14 | AAGGCTCTTGACACGAAGGATAG AGAATGNNGACCGACTCGCATTACCCT*A*T |
| Adapter3-BC3-Adapter2-#RNA15 | AAGGCTCTTGACACGAAGGATAG CATCCANNACCGACTCGCATTACCCT*A*T  |
| Adapter3-BC3-Adapter2-#RNA16 | AAGGCTCTTGACACGAAGGATAG GTTTCTNNGACCGACTCGCATTACCCT*A*T |
| Adapter3-BC3-Adapter2-#RNA17 | AAGGCTCTTGACACGAAGGATAG TCAGATNNGACCGACTCGCATTACCCT*A*T |
| Adapter3-BC3-Adapter2-#RNA18 | AAGGCTCTTGACACGAAGGATAG CAATGGNNGACCGACTCGCATTACCCT*A*T |
| Adapter3-BC3-Adapter2-#RNA19 | AAGGCTCTTGACACGAAGGATAG TGCTCANNACCGACTCGCATTACCCT*A*T  |
| Adapter3-BC3-Adapter2-#RNA20 | AAGGCTCTTGACACGAAGGATAG TCTGGANNACCGACTCGCATTACCCT*A*T  |
| Adapter3-BC3-Adapter2-#RNA21 | AAGGCTCTTGACACGAAGGATAG CTTTTGNNGACCGACTCGCATTACCCT*A*T |
| Adapter3-BC3-Adapter2-#RNA22 | AAGGCTCTTGACACGAAGGATAG ACTCAGNNGACCGACTCGCATTACCCT*A*T |
| Adapter3-BC3-Adapter2-#RNA23 | AAGGCTCTTGACACGAAGGATAG AACTAGNNGACCGACTCGCATTACCCT*A*T |
| Adapter3-BC3-Adapter2-#RNA24 | AAGGCTCTTGACACGAAGGATAG CCCTTANNACCGACTCGCATTACCCT*A*T  |
| Adapter3-BC3-Adapter2-#RNA25 | AAGGCTCTTGACACGAAGGATAG CTGATGNNGACCGACTCGCATTACCCT*A*T |
| Adapter3-BC3-Adapter2-#RNA26 | AAGGCTCTTGACACGAAGGATAG CATCAGNNGACCGACTCGCATTACCCT*A*T |
| Adapter3-BC3-Adapter2-#RNA27 | AAGGCTCTTGACACGAAGGATAG AACCTGNNGACCGACTCGCATTACCCT*A*T |
| Adapter3-BC3-Adapter2-#RNA28 | AAGGCTCTTGACACGAAGGATAG CAAATGNNGACCGACTCGCATTACCCT*A*T |
| Adapter3-BC3-Adapter2-#RNA29 | AAGGCTCTTGACACGAAGGATAG TCCCTANNACCGACTCGCATTACCCT*A*T  |
| Adapter3-BC3-Adapter2-#RNA30 | AAGGCTCTTGACACGAAGGATAG TTTATGNNGACCGACTCGCATTACCCT*A*T |
| Adapter3-BC3-Adapter2-#RNA31 | AAGGCTCTTGACACGAAGGATAG CTAAGANNACCGACTCGCATTACCCT*A*T  |
| Adapter3-BC3-Adapter2-#RNA32 | AAGGCTCTTGACACGAAGGATAG AATACANNACCGACTCGCATTACCCT*A*T  |
| Adapter3-BC3-Adapter2-#RNA33 | AAGGCTCTTGACACGAAGGATAG CTAACGNNGACCGACTCGCATTACCCT*A*T |
| Adapter3-BC3-Adapter2-#RNA34 | AAGGCTCTTGACACGAAGGATAG TTCTTANNACCGACTCGCATTACCCT*A*T  |
| Adapter3-BC3-Adapter2-#RNA35 | AAGGCTCTTGACACGAAGGATAG GATGGANNACCGACTCGCATTACCCT*A*T  |
| Adapter3-BC3-Adapter2-#RNA36 | AAGGCTCTTGACACGAAGGATAG GGGATTNNGACCGACTCGCATTACCCT*A*T |
| Adapter3-BC3-Adapter2-#RNA37 | AAGGCTCTTGACACGAAGGATAG GATATTNNGACCGACTCGCATTACCCT*A*T |
| Adapter3-BC3-Adapter2-#RNA38 | AAGGCTCTTGACACGAAGGATAG AACTTTNNGACCGACTCGCATTACCCT*A*T |
| Adapter3-BC3-Adapter2-#RNA39 | AAGGCTCTTGACACGAAGGATAG GCAACANNACCGACTCGCATTACCCT*A*T  |
| Adapter3-BC3-Adapter2-#RNA40 | AAGGCTCTTGACACGAAGGATAG AGAGAGNNGACCGACTCGCATTACCCT*A*T |
| Adapter3-BC3-Adapter2-#RNA41 | AAGGCTCTTGACACGAAGGATAG TTTGGNNGACCGACTCGCATTACCCT*A*T  |
| Adapter3-BC3-Adapter2-#RNA42 | AAGGCTCTTGACACGAAGGATAG GAGAGANNACCGACTCGCATTACCCT*A*T  |
| Adapter3-BC3-Adapter2-#RNA43 | AAGGCTCTTGACACGAAGGATAG TCCTCTNNGACCGACTCGCATTACCCT*A*T |
| Adapter3-BC3-Adapter2-#RNA44 | AAGGCTCTTGACACGAAGGATAG CCTCTANNACCGACTCGCATTACCCT*A*T  |
| Adapter3-BC3-Adapter2-#RNA45 | AAGGCTCTTGACACGAAGGATAG CTTAGGNNGACCGACTCGCATTACCCT*A*T |
| Adapter3-BC3-Adapter2-#RNA46 | AAGGCTCTTGACACGAAGGATAG TTTTATNNGACCGACTCGCATTACCCT*A*T |
| Adapter3-BC3-Adapter2-#RNA47 | AAGGCTCTTGACACGAAGGATAG TAGCTTNNACCGACTCGCATTACCCT*A*T  |
| Adapter3-BC3-Adapter2-#RNA48 | AAGGCTCTTGACACGAAGGATAG TCAACTNNGACCGACTCGCATTACCCT*A*T |
| Adapter3-BC3-Adapter2-#RNA49 | AAGGCTCTTGACACGAAGGATAG AGTATTNNGACCGACTCGCATTACCCT*A*T |
| Adapter3-BC3-Adapter2-#RNA50 | AAGGCTCTTGACACGAAGGATAG TGCTATNNGACCGACTCGCATTACCCT*A*T |
| Adapter3-BC3-Adapter2-#RNA51 | AAGGCTCTTGACACGAAGGATAG GTTCCANNACCGACTCGCATTACCCT*A*T  |
| Adapter3-BC3-Adapter2-#RNA52 | AAGGCTCTTGACACGAAGGATAG TGAACGNNGACCGACTCGCATTACCCT*A*T |

|                              |                                                         |
|------------------------------|---------------------------------------------------------|
| Adapter3-BC3-Adapter2-#RNA53 | AAGGCTCTTGACACGAAGGATAG TGATGNGGACCGACTCGCATTACCCT*A*T  |
| Adapter3-BC3-Adapter2-#RNA54 | AAGGCTCTTGACACGAAGGATAG GTATTTNNGACCGACTCGCATTACCCT*A*T |
| Adapter3-BC3-Adapter2-#RNA55 | AAGGCTCTTGACACGAAGGATAG GTACAGNNGACCGACTCGCATTACCCT*A*T |
| Adapter3-BC3-Adapter2-#RNA56 | AAGGCTCTTGACACGAAGGATAG AAACCGNNGACCGACTCGCATTACCCT*A*T |
| Adapter3-BC3-Adapter2-#RNA57 | AAGGCTCTTGACACGAAGGATAG CATTANNGACCGACTCGCATTACCCT*A*T  |
| Adapter3-BC3-Adapter2-#RNA58 | AAGGCTCTTGACACGAAGGATAG AGGGATNNGACCGACTCGCATTACCCT*A*T |
| Adapter3-BC3-Adapter2-#RNA59 | AAGGCTCTTGACACGAAGGATAG AAATCANNGACCGACTCGCATTACCCT*A*T |
| Adapter3-BC3-Adapter2-#RNA60 | AAGGCTCTTGACACGAAGGATAG GGAACNNGACCGACTCGCATTACCCT*A*T  |
| Adapter3-BC3-Adapter2-#RNA61 | AAGGCTCTTGACACGAAGGATAG CTCATANNGACCGACTCGCATTACCCT*A*T |
| Adapter3-BC3-Adapter2-#RNA62 | AAGGCTCTTGACACGAAGGATAG TAATCGNNGACCGACTCGCATTACCCT*A*T |
| Adapter3-BC3-Adapter2-#RNA63 | AAGGCTCTTGACACGAAGGATAG TAGTTANNGACCGACTCGCATTACCCT*A*T |
| Adapter3-BC3-Adapter2-#RNA64 | AAGGCTCTTGACACGAAGGATAG AATATGNGACCGACTCGCATTACCCT*A*T  |
| Adapter3-BC3-Adapter2-#RNA65 | AAGGCTCTTGACACGAAGGATAG TAGTCTNNGACCGACTCGCATTACCCT*A*T |
| Adapter3-BC3-Adapter2-#RNA66 | AAGGCTCTTGACACGAAGGATAG CATTCTNNGACCGACTCGCATTACCCT*A*T |
| Adapter3-BC3-Adapter2-#RNA67 | AAGGCTCTTGACACGAAGGATAG TTATGANNGACCGACTCGCATTACCCT*A*T |
| Adapter3-BC3-Adapter2-#RNA68 | AAGGCTCTTGACACGAAGGATAG CCTCATNNGACCGACTCGCATTACCCT*A*T |
| Adapter3-BC3-Adapter2-#RNA69 | AAGGCTCTTGACACGAAGGATAG GACTTANNGACCGACTCGCATTACCCT*A*T |
| Adapter3-BC3-Adapter2-#RNA70 | AAGGCTCTTGACACGAAGGATAG ACAACGNGACCGACTCGCATTACCCT*A*T  |
| Adapter3-BC3-Adapter2-#RNA71 | AAGGCTCTTGACACGAAGGATAG GATTTGNGACCGACTCGCATTACCCT*A*T  |
| Adapter3-BC3-Adapter2-#RNA72 | AAGGCTCTTGACACGAAGGATAG GACCTNNGACCGACTCGCATTACCCT*A*T  |
| Adapter3-BC3-Adapter2-#RNA73 | AAGGCTCTTGACACGAAGGATAG CGAATTNNGACCGACTCGCATTACCCT*A*T |
| Adapter3-BC3-Adapter2-#RNA74 | AAGGCTCTTGACACGAAGGATAG TTATTGNGACCGACTCGCATTACCCT*A*T  |
| Adapter3-BC3-Adapter2-#RNA75 | AAGGCTCTTGACACGAAGGATAG ACTTTGNGACCGACTCGCATTACCCT*A*T  |
| Adapter3-BC3-Adapter2-#RNA76 | AAGGCTCTTGACACGAAGGATAG AACTGANNGACCGACTCGCATTACCCT*A*T |
| Adapter3-BC3-Adapter2-#RNA77 | AAGGCTCTTGACACGAAGGATAG GCTACTNNGACCGACTCGCATTACCCT*A*T |
| Adapter3-BC3-Adapter2-#RNA78 | AAGGCTCTTGACACGAAGGATAG AAATTGNGACCGACTCGCATTACCCT*A*T  |
| Adapter3-BC3-Adapter2-#RNA79 | AAGGCTCTTGACACGAAGGATAG ACCTCANNGACCGACTCGCATTACCCT*A*T |
| Adapter3-BC3-Adapter2-#RNA80 | AAGGCTCTTGACACGAAGGATAG GGATGANNGACCGACTCGCATTACCCT*A*T |
| Adapter3-BC3-Adapter2-#RNA81 | AAGGCTCTTGACACGAAGGATAG GACATGNGACCGACTCGCATTACCCT*A*T  |
| Adapter3-BC3-Adapter2-#RNA82 | AAGGCTCTTGACACGAAGGATAG AATCTTNGACCGACTCGCATTACCCT*A*T  |
| Adapter3-BC3-Adapter2-#RNA83 | AAGGCTCTTGACACGAAGGATAG TAATTTNNGACCGACTCGCATTACCCT*A*T |
| Adapter3-BC3-Adapter2-#RNA84 | AAGGCTCTTGACACGAAGGATAG TCCTGANNGACCGACTCGCATTACCCT*A*T |
| Adapter3-BC3-Adapter2-#RNA85 | AAGGCTCTTGACACGAAGGATAG GTTCTTNGACCGACTCGCATTACCCT*A*T  |
| Adapter3-BC3-Adapter2-#RNA86 | AAGGCTCTTGACACGAAGGATAG GCTTCANNGACCGACTCGCATTACCCT*A*T |
| Adapter3-BC3-Adapter2-#RNA87 | AAGGCTCTTGACACGAAGGATAG TTAGAGNNGACCGACTCGCATTACCCT*A*T |
| Adapter3-BC3-Adapter2-#RNA88 | AAGGCTCTTGACACGAAGGATAG TAACTGNGACCGACTCGCATTACCCT*A*T  |
| Adapter3-BC3-Adapter2-#RNA89 | AAGGCTCTTGACACGAAGGATAG CTGTTANNGACCGACTCGCATTACCCT*A*T |
| Adapter3-BC3-Adapter2-#RNA90 | AAGGCTCTTGACACGAAGGATAG CACCATNNGACCGACTCGCATTACCCT*A*T |
| Adapter3-BC3-Adapter2-#RNA91 | AAGGCTCTTGACACGAAGGATAG AAATGTNNGACCGACTCGCATTACCCT*A*T |
| Adapter3-BC3-Adapter2-#RNA92 | AAGGCTCTTGACACGAAGGATAG CTCTCANNGACCGACTCGCATTACCCT*A*T |
| Adapter3-BC3-Adapter2-#RNA93 | AAGGCTCTTGACACGAAGGATAG TTCCCTNNGACCGACTCGCATTACCCT*A*T |
| Adapter3-BC3-Adapter2-#RNA94 | AAGGCTCTTGACACGAAGGATAG TTCGATNNGACCGACTCGCATTACCCT*A*T |
| Adapter3-BC3-Adapter2-#RNA95 | AAGGCTCTTGACACGAAGGATAG CTATGTNNGACCGACTCGCATTACCCT*A*T |
| Adapter3-BC3-Adapter2-#RNA96 | AAGGCTCTTGACACGAAGGATAG TCATCANNGACCGACTCGCATTACCCT*A*T |

## Second Split-Pool Barcodes for 2 cycles Split-Pool

| Oligo name                    | Sequence                                             |
|-------------------------------|------------------------------------------------------|
| Adapter3-BC2a-Adapter1-#RNA1  | AAGGCTCTTGACACGAAGGATAG CACAGAAGTGGAAAAGGAAGGTG*G*T  |
| Adapter3-BC2a-Adapter1-#RNA2  | AAGGCTCTTGACACGAAGGATAG TAGTAAAGTGGAAAAGGAAGGTG*G*T  |
| Adapter3-BC2a-Adapter1-#RNA3  | AAGGCTCTTGACACGAAGGATAG TACGCTAGTGGAAAAGGAAGGTG*G*T  |
| Adapter3-BC2a-Adapter1-#RNA4  | AAGGCTCTTGACACGAAGGATAG TTTAGCAGTGGAAAAGGAAGGTG*G*T  |
| Adapter3-BC2a-Adapter1-#RNA5  | AAGGCTCTTGACACGAAGGATAG GGAAGAAGTGGAAAAGGAAGGTG*G*T  |
| Adapter3-BC2a-Adapter1-#RNA6  | AAGGCTCTTGACACGAAGGATAG TACCTGAGTGGAAAAGGAAGGTG*G*T  |
| Adapter3-BC2a-Adapter1-#RNA7  | AAGGCTCTTGACACGAAGGATAG AAAGTCAGTGGAAAAGGAAGGTG*G*T  |
| Adapter3-BC2a-Adapter1-#RNA8  | AAGGCTCTTGACACGAAGGATAG GGTACAAGTGGAAAAGGAAGGTG*G*T  |
| Adapter3-BC2a-Adapter1-#RNA9  | AAGGCTCTTGACACGAAGGATAG AATGAGAGTGGAAAAGGAAGGTG*G*T  |
| Adapter3-BC2a-Adapter1-#RNA10 | AAGGCTCTTGACACGAAGGATAG GGATTCAGTGGAAAAGGAAGGTG*G*T  |
| Adapter3-BC2a-Adapter1-#RNA11 | AAGGCTCTTGACACGAAGGATAG TTAGCCAGTGGAAAAGGAAGGTG*G*T  |
| Adapter3-BC2a-Adapter1-#RNA12 | AAGGCTCTTGACACGAAGGATAG TCATCGAGTGGAAAAGGAAGGTG*G*T  |
| Adapter3-BC2a-Adapter1-#RNA13 | AAGGCTCTTGACACGAAGGATAG CAGGTTAGTGGAAAAGGAAGGTG*G*T  |
| Adapter3-BC2a-Adapter1-#RNA14 | AAGGCTCTTGACACGAAGGATAG AACGGAAGTGGAAAAGGAAGGTG*G*T  |
| Adapter3-BC2a-Adapter1-#RNA15 | AAGGCTCTTGACACGAAGGATAG ACTGTGAGTGGAAAAGGAAGGTG*G*T  |
| Adapter3-BC2a-Adapter1-#RNA16 | AAGGCTCTTGACACGAAGGATAG CCAATAAGTGGAAAAGGAAGGTG*G*T  |
| Adapter3-BC2a-Adapter1-#RNA17 | AAGGCTCTTGACACGAAGGATAG TTCAGGAGTGGAAAAGGAAGGTG*G*T  |
| Adapter3-BC2a-Adapter1-#RNA18 | AAGGCTCTTGACACGAAGGATAG CTTAATAGTGGAAAAGGAAGGTG*G*T  |
| Adapter3-BC2a-Adapter1-#RNA19 | AAGGCTCTTGACACGAAGGATAG GTTCAAAGTGGAAAAGGAAGGTG*G*T  |
| Adapter3-BC2a-Adapter1-#RNA20 | AAGGCTCTTGACACGAAGGATAG TTTGTAAGTGGAAAAGGAAGGTG*G*T  |
| Adapter3-BC2a-Adapter1-#RNA21 | AAGGCTCTTGACACGAAGGATAG CTA AAAAGTGGAAAAGGAAGGTG*G*T |
| Adapter3-BC2a-Adapter1-#RNA22 | AAGGCTCTTGACACGAAGGATAG TGG AATAGTGGAAAAGGAAGGTG*G*T |
| Adapter3-BC2a-Adapter1-#RNA23 | AAGGCTCTTGACACGAAGGATAG GAAACAAGTGGAAAAGGAAGGTG*G*T  |
| Adapter3-BC2a-Adapter1-#RNA24 | AAGGCTCTTGACACGAAGGATAG AGTTTTAGTGGAAAAGGAAGGTG*G*T  |
| Adapter3-BC2a-Adapter1-#RNA25 | AAGGCTCTTGACACGAAGGATAG GCGAAAAGTGGAAAAGGAAGGTG*G*T  |
| Adapter3-BC2a-Adapter1-#RNA26 | AAGGCTCTTGACACGAAGGATAG TCTAAAAGTGGAAAAGGAAGGTG*G*T  |
| Adapter3-BC2a-Adapter1-#RNA27 | AAGGCTCTTGACACGAAGGATAG CGAGTTAGTGGAAAAGGAAGGTG*G*T  |
| Adapter3-BC2a-Adapter1-#RNA28 | AAGGCTCTTGACACGAAGGATAG AAATGGAGTGGAAAAGGAAGGTG*G*T  |
| Adapter3-BC2a-Adapter1-#RNA29 | AAGGCTCTTGACACGAAGGATAG CTAATGAGTGGAAAAGGAAGGTG*G*T  |
| Adapter3-BC2a-Adapter1-#RNA30 | AAGGCTCTTGACACGAAGGATAG CTAAGTAGTGGAAAAGGAAGGTG*G*T  |
| Adapter3-BC2a-Adapter1-#RNA31 | AAGGCTCTTGACACGAAGGATAG TTTGAGAGTGGAAAAGGAAGGTG*G*T  |
| Adapter3-BC2a-Adapter1-#RNA32 | AAGGCTCTTGACACGAAGGATAG TCTGGAAGTGGAAAAGGAAGGTG*G*T  |
| Adapter3-BC2a-Adapter1-#RNA33 | AAGGCTCTTGACACGAAGGATAG GGATAAAGTGGAAAAGGAAGGTG*G*T  |
| Adapter3-BC2a-Adapter1-#RNA34 | AAGGCTCTTGACACGAAGGATAG TAGGATAGTGGAAAAGGAAGGTG*G*T  |
| Adapter3-BC2a-Adapter1-#RNA35 | AAGGCTCTTGACACGAAGGATAG TAAGTGAGTGGAAAAGGAAGGTG*G*T  |
| Adapter3-BC2a-Adapter1-#RNA36 | AAGGCTCTTGACACGAAGGATAG CTTACAGTGGAAAAGGAAGGTG*G*T   |
| Adapter3-BC2a-Adapter1-#RNA37 | AAGGCTCTTGACACGAAGGATAG GTCATAAGTGGAAAAGGAAGGTG*G*T  |
| Adapter3-BC2a-Adapter1-#RNA38 | AAGGCTCTTGACACGAAGGATAG AGGTGAAGTGGAAAAGGAAGGTG*G*T  |
| Adapter3-BC2a-Adapter1-#RNA39 | AAGGCTCTTGACACGAAGGATAG ACGATCAGTGGAAAAGGAAGGTG*G*T  |
| Adapter3-BC2a-Adapter1-#RNA40 | AAGGCTCTTGACACGAAGGATAG GAGTTTAGTGGAAAAGGAAGGTG*G*T  |
| Adapter3-BC2a-Adapter1-#RNA41 | AAGGCTCTTGACACGAAGGATAG GTATTGAGTGGAAAAGGAAGGTG*G*T  |
| Adapter3-BC2a-Adapter1-#RNA42 | AAGGCTCTTGACACGAAGGATAG GCAATCAGTGGAAAAGGAAGGTG*G*T  |
| Adapter3-BC2a-Adapter1-#RNA43 | AAGGCTCTTGACACGAAGGATAG GATATTAGTGGAAAAGGAAGGTG*G*T  |
| Adapter3-BC2a-Adapter1-#RNA44 | AAGGCTCTTGACACGAAGGATAG TTACAGAGTGGAAAAGGAAGGTG*G*T  |
| Adapter3-BC2a-Adapter1-#RNA45 | AAGGCTCTTGACACGAAGGATAG TCGTTAAGTGGAAAAGGAAGGTG*G*T  |
| Adapter3-BC2a-Adapter1-#RNA46 | AAGGCTCTTGACACGAAGGATAG TAAGAAAGTGGAAAAGGAAGGTG*G*T  |
| Adapter3-BC2a-Adapter1-#RNA47 | AAGGCTCTTGACACGAAGGATAG TCCTAAAGTGGAAAAGGAAGGTG*G*T  |
| Adapter3-BC2a-Adapter1-#RNA48 | AAGGCTCTTGACACGAAGGATAG AAACCTTAGTGGAAAAGGAAGGTG*G*T |
| Adapter3-BC2a-Adapter1-#RNA49 | AAGGCTCTTGACACGAAGGATAG CAGTGAAGTGGAAAAGGAAGGTG*G*T  |

|                               |                                                      |
|-------------------------------|------------------------------------------------------|
| Adapter3-BC2a-Adapter1-#RNA50 | AAGGCTCTTGACACGAAGGATAG CCAGAAAGTGGAAAAGGAAGGTG*G*T  |
| Adapter3-BC2a-Adapter1-#RNA51 | AAGGCTCTTGACACGAAGGATAG ACAACAAGTGGAAAAGGAAGGTG*G*T  |
| Adapter3-BC2a-Adapter1-#RNA52 | AAGGCTCTTGACACGAAGGATAG CAGGAAAGTGGAAAAGGAAGGTG*G*T  |
| Adapter3-BC2a-Adapter1-#RNA53 | AAGGCTCTTGACACGAAGGATAG TGAGTAAGTGGAAAAGGAAGGTG*G*T  |
| Adapter3-BC2a-Adapter1-#RNA54 | AAGGCTCTTGACACGAAGGATAG GATTTAAGTGGAAAAGGAAGGTG*G*T  |
| Adapter3-BC2a-Adapter1-#RNA55 | AAGGCTCTTGACACGAAGGATAG AGAGAAAGTGGAAAAGGAAGGTG*G*T  |
| Adapter3-BC2a-Adapter1-#RNA56 | AAGGCTCTTGACACGAAGGATAG CTGAACAGTGGAAAAGGAAGGTG*G*T  |
| Adapter3-BC2a-Adapter1-#RNA57 | AAGGCTCTTGACACGAAGGATAG AAGCATAGTGGAAAAGGAAGGTG*G*T  |
| Adapter3-BC2a-Adapter1-#RNA58 | AAGGCTCTTGACACGAAGGATAG TTGTGAAGTGGAAAAGGAAGGTG*G*T  |
| Adapter3-BC2a-Adapter1-#RNA59 | AAGGCTCTTGACACGAAGGATAG AAACGAAGTGGAAAAGGAAGGTG*G*T  |
| Adapter3-BC2a-Adapter1-#RNA60 | AAGGCTCTTGACACGAAGGATAG TCCCTAAGTGGAAAAGGAAGGTG*G*T  |
| Adapter3-BC2a-Adapter1-#RNA61 | AAGGCTCTTGACACGAAGGATAG GAATATAGTGGAAAAGGAAGGTG*G*T  |
| Adapter3-BC2a-Adapter1-#RNA62 | AAGGCTCTTGACACGAAGGATAG TTGTTCAAGTGGAAAAGGAAGGTG*G*T |
| Adapter3-BC2a-Adapter1-#RNA63 | AAGGCTCTTGACACGAAGGATAG AACGTGAGTGGAAAAGGAAGGTG*G*T  |
| Adapter3-BC2a-Adapter1-#RNA64 | AAGGCTCTTGACACGAAGGATAG CATGTAAGTGGAAAAGGAAGGTG*G*T  |
| Adapter3-BC2a-Adapter1-#RNA65 | AAGGCTCTTGACACGAAGGATAG CATAGCAGTGGAAAAGGAAGGTG*G*T  |
| Adapter3-BC2a-Adapter1-#RNA66 | AAGGCTCTTGACACGAAGGATAG CAGTTCAGTGGAAAAGGAAGGTG*G*T  |
| Adapter3-BC2a-Adapter1-#RNA67 | AAGGCTCTTGACACGAAGGATAG TAAACAGTGGAAAAGGAAGGTG*G*T   |
| Adapter3-BC2a-Adapter1-#RNA68 | AAGGCTCTTGACACGAAGGATAG AGGATTAGTGGAAAAGGAAGGTG*G*T  |
| Adapter3-BC2a-Adapter1-#RNA69 | AAGGCTCTTGACACGAAGGATAG GATGAAAGTGGAAAAGGAAGGTG*G*T  |
| Adapter3-BC2a-Adapter1-#RNA70 | AAGGCTCTTGACACGAAGGATAG CTGCAAAGTGGAAAAGGAAGGTG*G*T  |
| Adapter3-BC2a-Adapter1-#RNA71 | AAGGCTCTTGACACGAAGGATAG GAAGTAAGTGGAAAAGGAAGGTG*G*T  |
| Adapter3-BC2a-Adapter1-#RNA72 | AAGGCTCTTGACACGAAGGATAG TCAGGTAGTGGAAAAGGAAGGTG*G*T  |
| Adapter3-BC2a-Adapter1-#RNA73 | AAGGCTCTTGACACGAAGGATAG GAGCAAAGTGGAAAAGGAAGGTG*G*T  |
| Adapter3-BC2a-Adapter1-#RNA74 | AAGGCTCTTGACACGAAGGATAG CTCACAAGTGGAAAAGGAAGGTG*G*T  |
| Adapter3-BC2a-Adapter1-#RNA75 | AAGGCTCTTGACACGAAGGATAG ACGGTTAGTGGAAAAGGAAGGTG*G*T  |
| Adapter3-BC2a-Adapter1-#RNA76 | AAGGCTCTTGACACGAAGGATAG CATAAAAGTGGAAAAGGAAGGTG*G*T  |
| Adapter3-BC2a-Adapter1-#RNA77 | AAGGCTCTTGACACGAAGGATAG AAGCTAAGTGGAAAAGGAAGGTG*G*T  |
| Adapter3-BC2a-Adapter1-#RNA78 | AAGGCTCTTGACACGAAGGATAG GAAGGTAGTGGAAAAGGAAGGTG*G*T  |
| Adapter3-BC2a-Adapter1-#RNA79 | AAGGCTCTTGACACGAAGGATAG CATTGAGTGGAAAAGGAAGGTG*G*T   |
| Adapter3-BC2a-Adapter1-#RNA80 | AAGGCTCTTGACACGAAGGATAG CAATAAAGTGGAAAAGGAAGGTG*G*T  |
| Adapter3-BC2a-Adapter1-#RNA81 | AAGGCTCTTGACACGAAGGATAG TAATTCAGTGGAAAAGGAAGGTG*G*T  |
| Adapter3-BC2a-Adapter1-#RNA82 | AAGGCTCTTGACACGAAGGATAG TCCATGAGTGGAAAAGGAAGGTG*G*T  |
| Adapter3-BC2a-Adapter1-#RNA83 | AAGGCTCTTGACACGAAGGATAG TGCTATAGTGGAAAAGGAAGGTG*G*T  |
| Adapter3-BC2a-Adapter1-#RNA84 | AAGGCTCTTGACACGAAGGATAG AGGCAAAGTGGAAAAGGAAGGTG*G*T  |
| Adapter3-BC2a-Adapter1-#RNA85 | AAGGCTCTTGACACGAAGGATAG AACAGGAGTGGAAAAGGAAGGTG*G*T  |
| Adapter3-BC2a-Adapter1-#RNA86 | AAGGCTCTTGACACGAAGGATAG CAACATAGTGGAAAAGGAAGGTG*G*T  |
| Adapter3-BC2a-Adapter1-#RNA87 | AAGGCTCTTGACACGAAGGATAG TCTCTCAGTGGAAAAGGAAGGTG*G*T  |
| Adapter3-BC2a-Adapter1-#RNA88 | AAGGCTCTTGACACGAAGGATAG AGTTCCAGTGGAAAAGGAAGGTG*G*T  |
| Adapter3-BC2a-Adapter1-#RNA89 | AAGGCTCTTGACACGAAGGATAG TCCAACAGTGGAAAAGGAAGGTG*G*T  |
| Adapter3-BC2a-Adapter1-#RNA90 | AAGGCTCTTGACACGAAGGATAG AGGAACAGTGGAAAAGGAAGGTG*G*T  |
| Adapter3-BC2a-Adapter1-#RNA91 | AAGGCTCTTGACACGAAGGATAG GCTTTCAGTGGAAAAGGAAGGTG*G*T  |
| Adapter3-BC2a-Adapter1-#RNA92 | AAGGCTCTTGACACGAAGGATAG AATGGCAGTGGAAAAGGAAGGTG*G*T  |
| Adapter3-BC2a-Adapter1-#RNA93 | AAGGCTCTTGACACGAAGGATAG AACTAAGTGGAAAAGGAAGGTG*G*T   |
| Adapter3-BC2a-Adapter1-#RNA94 | AAGGCTCTTGACACGAAGGATAG TTGCTGAGTGGAAAAGGAAGGTG*G*T  |
| Adapter3-BC2a-Adapter1-#RNA95 | AAGGCTCTTGACACGAAGGATAG GGTTCAGTGGAAAAGGAAGGTG*G*T   |
| Adapter3-BC2a-Adapter1-#RNA96 | AAGGCTCTTGACACGAAGGATAG CAATTTAGTGGAAAAGGAAGGTG*G*T  |
