# Supplementary material for: Copolymerization of single-cell nucleic acids into balls of acrylamide gel
Source: PubMed Central journal article supplement (PMC6961581; doi:10.1101/gr.253047.119), 2020-01
Supplement: supp_gr.253047.119_Supplemental_Tables.pdf [file supp_gr.253047.119_Supplemental_Tables.pdf]

**Supplemental Table S1**

|    | <b>BAG barcodes</b><br>(sorted by total unique templates) | <b>Total<br/>read pairs</b> | <b>Mapped<br/>read pairs</b> | <b>Unique<br/>templates</b> | <b>Reads per<br/>template</b> | <b>Genome<br/>coverage</b> |
|----|-----------------------------------------------------------|-----------------------------|------------------------------|-----------------------------|-------------------------------|----------------------------|
| 1  | ATTCCTCTACT                                               | 16077933                    | 7635336                      | 2087974                     | 3.66                          | 8.37%                      |
| 2  | CAAAGTGTTCT                                               | 9105339                     | 4550849                      | 1315784                     | 3.46                          | 5.62%                      |
| 3  | CATAATTCAAG                                               | 7418418                     | 3919711                      | 1164651                     | 3.37                          | 5.03%                      |
| 4  | CCTAGTTGAAC                                               | 7039734                     | 3639037                      | 1062977                     | 3.42                          | 4.65%                      |
| 5  | GTAATAAGAAG                                               | 7276520                     | 3855493                      | 1054858                     | 3.65                          | 4.54%                      |
| 6  | ATTCCTTCAGA                                               | 7108210                     | 3760542                      | 983943                      | 3.82                          | 4.28%                      |
| 7  | CAGAAGTCATC                                               | 6901533                     | 3556979                      | 976760                      | 3.64                          | 4.25%                      |
| 8  | GATATTAATAT                                               | 6722759                     | 3548833                      | 962843                      | 3.69                          | 4.19%                      |
| 9  | CACATAGCAAC                                               | 6779536                     | 3440941                      | 952106                      | 3.61                          | 4.17%                      |
| 10 | AGTTCGCGTGA                                               | 5784957                     | 3165964                      | 889878                      | 3.56                          | 3.88%                      |
| 11 | AAGTCATCTTA                                               | 5474677                     | 3027753                      | 869502                      | 3.48                          | 3.80%                      |
| 12 | AGCAGTGCTAA                                               | 5787047                     | 2992010                      | 856011                      | 3.50                          | 3.82%                      |
| 13 | AATTAGGCAGT                                               | 5332006                     | 2903604                      | 836609                      | 3.47                          | 3.68%                      |
| 14 | CAGAAGTCACT                                               | 5786830                     | 3071809                      | 836285                      | 3.67                          | 3.68%                      |
| 15 | AAGATGAGTGT                                               | 5419152                     | 2899824                      | 811577                      | 3.57                          | 3.57%                      |
| 16 | ATTCCTCGTCT                                               | 5454782                     | 2845908                      | 762022                      | 3.73                          | 3.38%                      |
| 17 | CCTTCAGTAGC                                               | 5248430                     | 2813452                      | 759570                      | 3.70                          | 3.33%                      |
| 18 | GGAACTTTAGG                                               | 5007195                     | 2680142                      | 736275                      | 3.64                          | 3.26%                      |
| 19 | CAAGCAACTAG                                               | 4461881                     | 2373543                      | 705348                      | 3.37                          | 3.12%                      |
| 20 | GTGTCTTCAAG                                               | 4213796                     | 2360712                      | 644147                      | 3.66                          | 2.89%                      |
| 21 | CAGAAGGTAAT                                               | 4806294                     | 2397885                      | 637347                      | 3.76                          | 2.85%                      |
| 22 | GTGTCTACAGC                                               | 4049982                     | 2124910                      | 616135                      | 3.45                          | 2.79%                      |
| 23 | AGCAACGTTAG                                               | 4057289                     | 2257777                      | 610460                      | 3.70                          | 2.69%                      |
| 24 | AACGTACTTGT                                               | 3537936                     | 2015630                      | 558227                      | 3.61                          | 2.50%                      |
| 25 | GTGATGAGTTA                                               | 3819212                     | 1994950                      | 557658                      | 3.58                          | 2.51%                      |
| 26 | CATAGACAAGT                                               | 3748126                     | 1999150                      | 551095                      | 3.63                          | 2.47%                      |
| 27 | ATCGTGCAAGT                                               | 3427397                     | 1830061                      | 550647                      | 3.32                          | 2.50%                      |
| 28 | CCAATAATACG                                               | 3707658                     | 1893947                      | 549562                      | 3.45                          | 2.48%                      |
| 29 | ATGGCTATTGG                                               | 3620876                     | 1915009                      | 545654                      | 3.51                          | 2.46%                      |
| 30 | AAGGTTAGAGA                                               | 3426121                     | 1899547                      | 541318                      | 3.51                          | 2.39%                      |
| 31 | ATGAATTGAGT                                               | 3629501                     | 2005908                      | 539979                      | 3.71                          | 2.43%                      |
| 32 | GGTCTATCTGT                                               | 3304347                     | 1828523                      | 533038                      | 3.43                          | 2.39%                      |
| 33 | CATTTGACTGA                                               | 3351552                     | 1891525                      | 514494                      | 3.68                          | 2.28%                      |
| 34 | AACGTATGATA                                               | 3383189                     | 1829280                      | 493420                      | 3.71                          | 2.23%                      |
| 35 | ATGGAAATTCC                                               | 2853257                     | 1524108                      | 488656                      | 3.12                          | 2.22%                      |
| 36 | ATCAAGTATTC                                               | 2944450                     | 1586526                      | 478058                      | 3.32                          | 2.15%                      |
| 37 | AGTGTGTATTC                                               | 2624449                     | 1442040                      | 474159                      | 3.04                          | 2.15%                      |
| 38 | CTCTCTACAAT                                               | 2973647                     | 1623298                      | 471142                      | 3.45                          | 2.16%                      |
| 39 | CCTAAGGAAGA                                               | 2678477                     | 1458433                      | 433208                      | 3.37                          | 1.97%                      |
| 40 | AAAGGGTCAGA                                               | 2490914                     | 1491880                      | 401993                      | 3.71                          | 1.77%                      |
| 41 | AAGATGCAACG                                               | 2448387                     | 1352779                      | 388644                      | 3.48                          | 1.79%                      |
| 42 | ATGGAATATAG                                               | 2377397                     | 1261700                      | 388248                      | 3.25                          | 1.80%                      |
| 43 | ATGGCTGTAAT                                               | 2429371                     | 1307379                      | 364989                      | 3.58                          | 1.69%                      |
| 44 | CATTTGTTACC                                               | 2393986                     | 1322912                      | 361597                      | 3.66                          | 1.65%                      |
| 45 | CCAATAACTCT                                               | 2201114                     | 1261080                      | 352664                      | 3.58                          | 1.58%                      |
| 46 | GGTTCCTTCG                                                | 2498434                     | 1319128                      | 344129                      | 3.83                          | 1.60%                      |
| 47 | CATAATAATAT                                               | 2123323                     | 1162943                      | 339614                      | 3.42                          | 1.54%                      |
| 48 | CTCTCTAGTGT                                               | 2110745                     | 1137844                      | 338078                      | 3.37                          | 1.54%                      |
| 49 | GATTATGAATC                                               | 2139870                     | 1179318                      | 335994                      | 3.51                          | 1.52%                      |

|    | <b>BAG barcodes</b><br>(sorted by total unique templates) | <b>Total<br/>read pairs</b> | <b>Mapped<br/>read pairs</b> | <b>Unique<br/>templates</b> | <b>Reads per<br/>template</b> | <b>Genome<br/>coverage</b> |
|----|-----------------------------------------------------------|-----------------------------|------------------------------|-----------------------------|-------------------------------|----------------------------|
| 50 | ATAGTTTGTA                                                | 2091657                     | 1212518                      | 335911                      | 3.61                          | 1.53%                      |
| 51 | CAGATTCGTT                                                | 1964080                     | 1087732                      | 332221                      | 3.27                          | 1.48%                      |
| 52 | CATAGACGACA                                               | 2202146                     | 1170726                      | 325761                      | 3.59                          | 1.48%                      |
| 53 | ATAGTTTATCT                                               | 2081229                     | 1154891                      | 324171                      | 3.56                          | 1.47%                      |
| 54 | GGAAGTGTCT                                                | 2182498                     | 1138460                      | 318608                      | 3.57                          | 1.46%                      |
| 55 | CAGAAGTGTA                                                | 2165475                     | 1208916                      | 317243                      | 3.81                          | 1.45%                      |
| 56 | CCTAAGTATCT                                               | 1905296                     | 1053861                      | 311570                      | 3.38                          | 1.43%                      |
| 57 | AGGTTTGTTAG                                               | 2041178                     | 1102441                      | 311090                      | 3.54                          | 1.42%                      |
| 58 | CAAAGTCTTGT                                               | 1971732                     | 1090411                      | 309564                      | 3.52                          | 1.42%                      |
| 59 | AACTTGGATTA                                               | 1810925                     | 1021712                      | 309223                      | 3.30                          | 1.38%                      |
| 60 | CCTTCAATTGG                                               | 2018826                     | 1088956                      | 307253                      | 3.54                          | 1.40%                      |
| 61 | CCTGAATCACT                                               | 1773178                     | 1050324                      | 302989                      | 3.47                          | 1.37%                      |
| 62 | CAAAGTGAATC                                               | 2012251                     | 1041132                      | 298023                      | 3.49                          | 1.37%                      |
| 63 | AGCAGTGTAGC                                               | 1954141                     | 1039979                      | 295275                      | 3.52                          | 1.37%                      |
| 64 | CAAAGTGATCG                                               | 1946793                     | 998403                       | 289290                      | 3.45                          | 1.32%                      |
| 65 | GTGTCTGGTCA                                               | 1892513                     | 1004133                      | 284574                      | 3.53                          | 1.32%                      |
| 66 | AGGTACTAAGC                                               | 1719227                     | 954241                       | 269990                      | 3.53                          | 1.23%                      |
| 67 | CTAACAGGTCA                                               | 1597603                     | 897688                       | 269660                      | 3.33                          | 1.22%                      |
| 68 | GGAACCTAATG                                               | 1632807                     | 978295                       | 268462                      | 3.64                          | 1.24%                      |
| 69 | AAGATGTAATG                                               | 1636922                     | 965599                       | 266950                      | 3.62                          | 1.24%                      |
| 70 | AGGTTTTATTC                                               | 1760545                     | 950448                       | 266459                      | 3.57                          | 1.22%                      |
| 71 | CATACGCGTTC                                               | 1612978                     | 863582                       | 264244                      | 3.27                          | 1.20%                      |
| 72 | CACATACGTGA                                               | 1736304                     | 930170                       | 251970                      | 3.69                          | 1.16%                      |
| 73 | AGTACATAACA                                               | 1388166                     | 824650                       | 250210                      | 3.30                          | 1.14%                      |
| 74 | ATTGACTGTGG                                               | 1333091                     | 805572                       | 250105                      | 3.22                          | 1.14%                      |
| 75 | AGCAGTTATTC                                               | 1615960                     | 834235                       | 238377                      | 3.50                          | 1.11%                      |
| 76 | GATGGAGCTAA                                               | 1265552                     | 712311                       | 236392                      | 3.01                          | 1.08%                      |
| 77 | CTTAGGTTATT                                               | 1599295                     | 891261                       | 233486                      | 3.82                          | 1.06%                      |
| 78 | ATGAGGACAAT                                               | 1436007                     | 803602                       | 232910                      | 3.45                          | 1.05%                      |
| 79 | GGTAATATTCC                                               | 1293924                     | 744541                       | 229005                      | 3.25                          | 1.03%                      |
| 80 | ATCGCATGACG                                               | 1272915                     | 734017                       | 225078                      | 3.26                          | 1.02%                      |
| 81 | CTTAGGCGATG                                               | 1266206                     | 794914                       | 220980                      | 3.60                          | 1.02%                      |
| 82 | GTCAGTAGATC                                               | 1135166                     | 639652                       | 214317                      | 2.98                          | 0.98%                      |
| 83 | CAAAGTGTAA                                                | 1442942                     | 760270                       | 212993                      | 3.57                          | 0.99%                      |
| 84 | GGGAAAAGTCG                                               | 1101254                     | 606382                       | 200223                      | 3.03                          | 0.92%                      |
| 85 | GGTCTATATAG                                               | 1173143                     | 667057                       | 196796                      | 3.39                          | 0.91%                      |
| 86 | GGGAAACAAGT                                               | 991437                      | 557538                       | 188464                      | 2.96                          | 0.84%                      |
| 87 | AGCAGTCTAAG                                               | 1236589                     | 666013                       | 187459                      | 3.55                          | 0.87%                      |
| 88 | GGTTTCGTAAT                                               | 847978                      | 488088                       | 162480                      | 3.00                          | 0.75%                      |

**Supplemental Table S1.** The read pairs, mapped read pairs, uniquely-tagged templates, mapped reads per template (RPT), and the coverage of the genome for each of the 88 BAGs in SKN1 single-nucleus DNA BAG-seq experiments.

## Supplemental Table S2

| Source base | Destination base | Error rate in at least 1 BAG | Error rate in at least 2 BAGs |
|-------------|------------------|------------------------------|-------------------------------|
| A           | C                | 1.4E-04                      | 1.1E-06                       |
| A           | G                | 2.4E-04                      | 3.5E-06                       |
| A           | T                | 7.6E-04                      | 2.1E-06                       |
| C           | A                | 1.1E-03                      | 3.7E-06                       |
| C           | G                | 2.9E-03                      | 1.2E-05                       |
| C           | T                | 6.9E-04                      | 4.6E-06                       |
| G           | A                | 6.9E-04                      | 4.8E-06                       |
| G           | C                | 2.9E-03                      | 1.2E-05                       |
| G           | T                | 1.1E-03                      | 3.9E-06                       |
| T           | A                | 7.6E-04                      | 2.0E-06                       |
| T           | C                | 2.4E-04                      | 3.6E-06                       |
| T           | G                | 1.4E-04                      | 1.3E-06                       |

**Supplemental Table S2.** Post error correction (errors corrected by multiple reads with consensus in each BAG), the chance of an error appearing in at least 1 BAG or in at least two BAGs.

### Supplemental Table S3

| Barcode     | SKN1-SNV | SK-BR-3-SNV | Minority Ratio | Barcode     | SKN1-SNV | SK-BR-3-SNV | Minority Ratio |
|-------------|----------|-------------|----------------|-------------|----------|-------------|----------------|
| CCTAGTCGTCT | 17       | 2586        | 0.65%          | CATAGATGATA | 572      | 4           | 0.69%          |
| ATAACGATACG | 8        | 2598        | 0.31%          | ATGGCTTGACG | 675      | 2           | 0.30%          |
| GAAACGCGATG | 0        | 1478        | 0.00%          | CAGATTTGATA | 862      | 1           | 0.12%          |
| ATTCAGTCTTA | 5        | 3045        | 0.16%          | ATCGCATCATC | 703      | 3           | 0.42%          |
| ATTCCTAATTG | 10       | 1959        | 0.51%          | AAAGGGGCATA | 952      | 4           | 0.42%          |
| ATTGTATCTAC | 17       | 7383        | 0.23%          | CATCCTACTGA | 560      | 1           | 0.18%          |
| CCAATAAGTGT | 4        | 2889        | 0.14%          | GTGTCTGCACG | 890      | 0           | 0.00%          |
| GGTTTCCATAA | 3        | 2212        | 0.14%          | AATCGAGGTTG | 575      | 4           | 0.69%          |
| AGGTACGCAAC | 4        | 3078        | 0.13%          | CTTAGGCGTTC | 521      | 3           | 0.57%          |
| GAAGGTAGTTA | 7        | 2550        | 0.27%          | AAGTCAACTGA | 622      | 7           | 1.11%          |
| GGTCTATCTCG | 3        | 1757        | 0.17%          | CAGTAAGGTAT | 737      | 7           | 0.94%          |
| CATAGAGGTCA | 4        | 2437        | 0.16%          | GGAACCTTACC | 949      | 6           | 0.63%          |
| ATTGACAGTAC | 4        | 2659        | 0.15%          | CATTTGCTATC | 762      | 1           | 0.13%          |
| CAAAGTGCATA | 2        | 2752        | 0.07%          | AATCGAAGAGA | 596      | 5           | 0.83%          |
| CCAATAAGTAC | 11       | 3229        | 0.34%          | AGTGTGTAACA | 827      | 7           | 0.84%          |
| GGGAAACGACA | 16       | 6120        | 0.26%          | CTAACAAATGC | 693      | 3           | 0.43%          |
| GAAACGATTC  | 3        | 5604        | 0.05%          | GAAACGTGTGG | 595      | 0           | 0.00%          |
| CTCTCTCTAGA | 5        | 2360        | 0.21%          | GAGTTCCTTAC | 1306     | 3           | 0.23%          |
| AGTATTTTAGG | 4        | 2005        | 0.20%          | AAGTCACAACG | 485      | 1           | 0.21%          |
| AGGTACGTACA | 13       | 5413        | 0.24%          | CTCTCTAGAAG | 529      | 1           | 0.19%          |
| AGCTAGACACA | 12       | 3129        | 0.38%          | GTGTCTATAAC | 1831     | 0           | 0.00%          |
| AAGCATAGAGA | 9        | 4922        | 0.18%          | CCAATAAATCA | 757      | 5           | 0.66%          |
| AAGCATAGTCG | 3        | 2547        | 0.12%          | CAAGCATAACA | 608      | 1           | 0.16%          |
| ATAACGGATGT | 3        | 2105        | 0.14%          | AGGTTTCATAA | 641      | 3           | 0.47%          |
| CAAAGTTTAGG | 3        | 2734        | 0.11%          | CAGAAGAATCA | 531      | 2           | 0.38%          |
| AGGTTTTCTCG | 8        | 4661        | 0.17%          | CACATAGTACA | 730      | 4           | 0.54%          |
| GGTTCTTACC  | 5        | 2781        | 0.18%          | AGAGCACTTCG | 876      | 4           | 0.45%          |
| ATATTACTTAC | 21       | 9414        | 0.22%          | CTCTCTTGATA | 838      | 4           | 0.48%          |
| GATGGAGATAC | 8        | 4957        | 0.16%          | GATATTCGACA | 832      | 4           | 0.48%          |
| AAGGTTGAATC | 6        | 4992        | 0.12%          | CTAACAGTTGA | 1713     | 5           | 0.29%          |
| ATTGTAACACA | 6        | 3446        | 0.17%          | CTCAATTTATT | 778      | 1           | 0.13%          |
| AAGTCATCTAC | 13       | 6596        | 0.20%          | CAACTTGATCG | 871      | 1           | 0.11%          |
| GGTTCTTGATA | 11       | 3283        | 0.33%          | CATTTGAATCA | 852      | 0           | 0.00%          |
| AAAGGGGCACG | 6        | 2821        | 0.21%          | AGAGCAGGTAT | 559      | 1           | 0.18%          |
| ATTAGTGTTG  | 7        | 2705        | 0.26%          | CAGATTGCATA | 694      | 5           | 0.72%          |
|             |          |             |                | CTAACATGTGG | 490      | 1           | 0.20%          |
|             |          |             |                | CCTAAGATTAA | 628      | 2           | 0.32%          |
|             |          |             |                | CAACACAGTCG | 610      | 4           | 0.65%          |

**Supplementary Table S3.** The number of SKN1-specific SNVs, SK-BR-3-specific SNVs and minority SNV ratio in each SKN1 or SK-BR-3 BAG from the 4-nuclei mixing DNA BAG-seq experiment.

### Supplemental Table S4

|              | male count | female count | binomial test code                    | p-value          |
|--------------|------------|--------------|---------------------------------------|------------------|
| Cluster #0   | 192        | 136          | binom.test(192, (192+136), p = 0.628) | <b>0.1101</b>    |
| Cluster #1   | 166        | 55           | binom.test(166, (166+55), p = 0.628)  | <b>0.0001201</b> |
| Cluster #2   | 71         | 36           | binom.test(71, (71+36), p = 0.628)    | <b>0.4848</b>    |
| Cluster #3   | 45         | 25           | binom.test(45,(45+25), p = 0.628)     | <b>0.9017</b>    |
| Cluster #4   | 26         | 22           | binom.test(26,(26+22), p = 0.628)     | <b>0.2334</b>    |
| Cluster #5   | 18         | 24           | binom.test(18,(18+24), p = 0.628)     | <b>0.009998</b>  |
| Cluster #6   | 10         | 15           | binom.test(10,(10+15), p = 0.628)     | <b>0.02252</b>   |
| Cluster #7   | 12         | 7            | binom.test(12,(12+7), p = 0.628)      | <b>1</b>         |
| Total Nuclei | 540        | 320          | 540 / (540 + 320) = 0.628             |                  |

**Supplemental Table S4.** Binomial test showing the difference in nuclei numbers between sexes in each cluster. The red color highlights the most significant difference among all the clusters.
