# Supplementary material for: Copolymerization of single-cell nucleic acids into balls of acrylamide gel
Source: Genome Res. 2020 Jan;30(1):49–61. doi: 10.1101/gr.253047.119 (PMC6961581; doi:10.1101/gr.253047.119)
Supplement: Supplemental Material [file supp_gr.253047.119_Supplemental_Data_S1.xlsx]

## Sheet: README
Supplemental Data S1 - Normalized bin count data for DNA BAGs from sample cor003_5
Column name	Description
bin.number	sequence number of bin in genome order
chrom	chromosome location of the bin
bin.start	chromosome position bin start coordinate in hg19
bin.end	chromosome position bin end coordinate in hg19
11-character string consisting of ACGT indicating the BAG barcode	the normalized bin count value

## Sheet: cor003_5.5k.bins.norm
bin.number	chrom	bin.start	bin.end	AAAGGGATTGG	AACTATATAAC	AACTATCGTTC	AACTATTATAG	AGAAGGGTACA	AGCTAGTGACG	AGTATTACACA	AGTGTGCGTGA	ATAGTTAATCA	ATGAATTCAGA	ATGACAGAAGA	ATGAGGAGTTA	ATGAGGATAGT	ATGAGGGTTGA	ATTCAGCTACT	ATTGACAATTG	CAACACACTTC	CAAGCAATATA	CACATAACTAG	CAGAAGGCACG	CATAGAAGTGT	CCTAGTCGAAT	CCTAGTGATCG	CTAATCTGAGT	CTCTCTACAAT	CTCTCTGAACT	CTCTCTGCAGT	GAAGGTCTAAG	GAGTTCAATAT	GGTCTAACACA	GGTCTACTATC	GGTCTAGATTA	GGTTTCACTCT	GGTTTCATTCC	GTACTAACTAG	GTCAGTAATGC	GTTTCGTCTCG	AAAGGGTCAAG	AAGCATCTAAG	AAGCATTGTGG	AAGTCAACTCT	ATCAGCGTACA	ATGACAACAAT	ATTAGTAATTG	CAAAGTTCTTA	CAGAAGTCTCG
1	chr1	1	428275	1.20956	1.44815	1.00485	1.52453	1.18834	1.01227	1.30706	1.00912	1.21369	1.10994	1.43552	1.69635	1.47502	1.51574	1.50445	1.23472	1.56277	1.183	1.31982	1.00539	1.14666	1.17669	1.31781	1.01515	1.53477	1.22961	1.26423	1.21437	1.3507	1.22476	1.29585	1.14918	1.29909	1.41081	1.13202	1.34136	1.11369	1.12295	1.12383	1.12586	1.57389	1.34645	1.18238	1.01163	0.99499	1.34475
2	chr1	428276	620697	0.51602	0.601694	1.2223	1.11759	0.467321	1.24892	1.16468	1.66604	0.954381	0.845241	0.577712	1.66453	0.419496	0.841486	0.695079	1.29753	0.635625	1.15397	0.583067	1.14521	1.02401	0.717498	0.559822	1.03886	0.75036	0.807537	0.418737	0.128011	1.17911	0.673359	1.32623	0.798847	0.668595	0.898021	0.849928	1.15322	0.65972	0.697372	0.447326	0.940747	0.524936	0.568573	0.668786	0.59455	1.01087	0.981178
3	chr1	620698	1122128	0.965369	1.3381	0.916701	1.40425	0.896609	1.47979	0.956887	1.26965	1.24323	1.08672	1.40842	1.18781	1.12127	1.21752	1.2165	0.939444	1.09739	1.49646	1.03828	1.2876	1.28483	1.4834	0.9983	1.02131	1.06019	1.12412	1.0745	0.723427	0.918162	0.982827	1.28408	1.11675	1.42786	0.996219	1.34804	1.36646	1.18386	1.38817	1.0623	0.984843	1.52763	1.2452	1.1254	0.592469	1.19134	0.895767
4	chr1	1122129	1779256	1.08334	0.850356	0.912937	1.23538	0.799391	2.19213	0.929535	1.14809	1.36207	0.905273	1.39868	0.855216	0.910024	1.13373	1.01753	0.856194	1.21088	0.83709	0.864969	0.925097	1.3275	1.41832	0.928107	1.09598	0.890443	1.14225	0.736136	0.679601	0.806129	0.985533	0.892398	1.04611	0.867194	1.12609	1.17475	1.25693	0.475652	1.27133	1.16269	1.1389	0.443026	1.42331	0.644181	1.03408	1.15948	1.12741
5	chr1	1779257	2357606	1.08938	1.04996	0.801587	0.923508	1.01111	1.22486	0.926171	1.29392	0.881564	0.942105	1.57544	1.13488	0.859709	1.09584	1.15441	1.02696	1.08936	1.12412	1.29873	0.761871	1.14178	0.990518	0.950282	1.08926	1.19105	1.20971	1.19657	1.07311	1.16102	0.872077	1.19448	0.927834	0.734095	1.04421	0.78038	0.901532	1.20139	0.796553	0.690292	0.93451	0.666391	1.28122	1.16456	0.360435	0.647976	1.01074
6	chr1	2357607	2964887	1.13406	1.59284	1.29377	1.31318	1.47582	1.84046	1.12665	1.43947	1.11178	1.35771	1.4594	1.2088	1.56144	1.06696	1.84405	1.49065	0.942826	1.44072	1.45046	1.26797	1.66837	2.66283	1.36926	1.63213	1.20373	1.67254	1.27925	1.11251	1.32329	1.25297	1.82924	1.73733	1.14625	1.49758	1.6332	1.65189	1.51784	1.6701	1.26758	1.19158	0.748071	1.54724	1.07644	1.47629	1.35929	1.33094
7	chr1	2964888	3470030	1.34958	1.12745	1.25324	1.32971	1.13592	1.12306	0.984781	1.10365	0.722207	1.00895	1.40904	1.08661	1.30584	0.989789	1.20139	1.0156	0.845541	1.10987	0.827862	0.863443	1.52214	1.61017	0.743488	1.2674	0.902973	0.851004	1.09749	0.964945	0.933538	0.899825	1.08477	0.898468	1.30871	1.23186	1.14626	1.21422	0.654169	1.10793	0.858815	0.905084	0.458893	0.995541	1.17377	0.8942	1.1063	1.03325
8	chr1	3470031	4193611	1.20995	1.07232	1.41044	1.21005	0.776085	0.57829	0.88234	1.26953	0.876756	1.04563	0.988523	1.0797	0.96095	0.93906	1.06264	0.940612	0.90842	1.11952	1.15314	1.09915	1.36841	1.06633	1.05147	1.21262	0.714696	0.876549	1.17155	0.991954	1.42314	1.03598	1.1766	0.91813	1.07984	1.23143	1.15256	1.00874	1.66007	1.07431	1.06007	0.722734	0.947358	0.846892	1.35738	0.865733	0.883596	1.01168
9	chr1	4193612	4734431	0.998725	1.12883	0.918342	1.08088	1.23357	1.00185	0.602887	1.08741	1.41134	0.922878	1.42524	0.993352	1.21288	0.836817	0.865623	1.08499	0.725149	0.873826	1.25299	1.17936	1.28802	1.12151	1.17137	1.14869	0.779711	0.979227	1.15231	1.09478	0.981026	1.03162	1.26064	1.00647	1.24702	1.11899	1.2636	1.07452	0.976579	1.12101	1.25538	1.02173	1.43222	1.15975	1.01454	1.20773	1.06065	1.30104
10	chr1	4734432	5296313	1.03128	0.933053	1.09046	1.12346	1.05718	1.29391	0.763794	1.13608	1.07036	0.948365	1.3675	1.12221	0.910066	1.32752	0.827685	0.974095	0.889858	0.80147	1.14889	0.944308	1.29892	1.27972	0.768442	1.13271	0.880155	1.0437	1.06036	1.23252	1.12897	1.31409	1.11868	1.29206	1.41589	1.12545	1.08039	1.22342	1.68161	0.95718	1.52928	0.804967	2.30117	1.2319	0.926418	1.47596	1.048	1.46477
11	chr1	5296314	5845062	0.913328	1.28729	1.15809	1.20921	1.1756	1.11555	0.738978	1.05409	0.949623	0.965526	1.17548	1.30821	1.06558	0.658438	0.962349	1.10474	1.12856	0.737674	1.21392	1.31305	1.39773	1.26951	0.838049	1.28173	0.990686	1.1872	0.971955	1.05607	0.930421	1.15332	1.22409	1.03556	1.17096	1.23043	1.04383	1.05031	1.52135	1.25265	1.92097	0.894149	1.73945	1.22987	0.98447	0.912679	1.02703	0.750706
12	chr1	5845063	6382868	0.81997	1.04708	1.14346	0.82775	1.2141	1.22157	0.726304	0.955902	1.31014	1.30887	1.28669	1.01216	0.894949	0.817244	0.582449	1.08857	1.25677	0.819405	1.09613	1.06877	1.23982	1.02889	1.14517	1.22307	0.976183	0.737892	0.853256	1.11075	1.20727	0.889632	0.961475	0.644553	0.886149	1.17712	0.812134	1.05853	1.037	1.01731	0.887474	0.87363	0.950578	0.963967	0.61139	0.77963	1.77004	0.75892
13	chr1	6382869	6962366	0.686325	0.990971	0.818702	1.12436	1.08265	0.880764	0.752068	1.28653	1.43161	1.13042	1.01083	1.18121	0.922974	0.932485	0.620104	1.01585	1.07405	0.818023	1.23344	1.13182	1.38135	1.17231	1.1839	0.988688	0.956092	0.957676	0.984388	0.927256	1.2552	1.11122	0.754141	0.986113	0.890721	1.04262	1.09189	1.17165	0.845785	1.32577	1.20102	0.940362	1.39029	0.872645	1.03608	1.20549	0.883053	1.07807
14	chr1	6962367	7468721	0.894309	0.94225	0.944048	0.907798	0.983771	1.48558	0.834174	1.03994	1.06963	0.854984	1.16133	1.21445	0.76645	1.55948	0.742618	1.03748	0.91171	0.992591	0.843534	1.09237	1.29344	1.29801	1.62621	0.871297	1.00213	1.40518	0.893257	1.0278	0.855885	1.13926	0.833824	1.21337	1.09605	1.20113	0.868769	0.924152	1.02229	1.06795	1.25061	0.840506	1.71287	1.06047	1.10418	0.856929	0.935128	1.32541
15	chr1	7468722	7999687	0.842306	1.03244	0.890585	1.04729	1.08702	1.11483	0.690766	1.03284	1.33001	0.769276	1.05941	0.934864	0.909464	0.92335	0.6554	0.976557	0.759097	0.940821	1.06652	1.00421	1.10556	1.33781	0.966632	1.04891	1.05435	0.75424	0.776936	0.916684	1.26521	1.20475	0.993073	1.05261	0.974009	1.03668	1.07441	1.14154	1.13542	0.997112	1.12611	1.06761	1.22311	1.04689	0.910067	0.921531	1.24643	0.938929
16	chr1	7999688	8554982	1.08589	1.36747	0.765317	1.14616	0.791475	0.848812	0.817294	1.20991	1.20438	0.671763	1.26069	1.05603	0.776835	0.920139	0.641996	1.08678	1.55762	0.806913	1.22048	1.22919	1.06535	1.22093	1.31128	0.967129	0.983485	0.963449	0.923223	1.00853	1.0046	1.0199	0.965408	1.18135	0.962251	1.05779	1.28349	1.28402	2.01754	1.21806	1.23307	1.12688	0.66038	1.39409	0.769759	1.2689	0.9967	0.819682
17	chr1	8554983	9133954	0.951409	1.19663	0.926607	0.970112	0.840127	0.979348	0.879681	0.843065	1.48419	0.863431	1.10253	1.37496	0.991441	1.08283	0.497524	0.98358	1.42929	0.922372	0.914426	0.983767	1.15276	1.21074	1.21754	0.847226	0.821958	1.05302	1.12811	1.23465	1.10181	1.09185	0.81886	0.992431	0.741759	1.10006	0.976537	1.17952	1.60956	0.85464	1.26169	0.838672	0.832237	1.10838	1.2138	0.785865	1.3592	0.911557
18	chr1	9133955	9673433	0.792146	1.00221	1.10106	0.955029	0.946409	1.12559	0.87259	0.876296	1.2673	1.10549	1.13155	1.14853	0.908339	1.00888	0.585489	1.16911	1.12561	1.13907	1.00644	0.914345	1.23929	1.20383	0.885538	0.949474	0.934479	1.02026	0.952073	1.15304	1.02425	1.22353	1.13146	0.901354	1.10954	1.19734	1.11451	1.03598	1.30106	1.01866	0.91049	0.73817	1.22691	1.16019	1.07892	0.728474	1.11453	1.31653
19	chr1	9673434	10246190	0.967413	1.17199	0.736424	0.851649	0.881199	1.36057	1.06844	1.07213	1.20972	0.996114	0.731494	1.01057	1.1022	1.30469	0.611442	1.08621	1.49974	1.06122	1.15179	0.946428	1.14951	1.16699	1.50838	1.30928	1.08541	1.07837	1.0423	0.923086	1.24959	1.03041	1.12986	1.15794	1.02058	1.01419	0.864717	1.2085	0.762441	1.29076	1.13618	1.04502	0.959502	0.911942	1.0131	0.948971	1.06833	1.72151
20	chr1	10246191	10793949	1.02865	0.794064	0.897864	1.07351	0.856129	1.32968	0.87677	1.06666	1.16425	1.04581	0.926937	0.975196	0.859493	1.28441	0.501898	1.08726	1.34846	1.02881	0.891721	0.818467	1.15144	1.07808	0.867189	0.972508	0.714022	1.14736	0.878664	0.803437	1.12809	0.835167	0.981711	1.01578	0.999515	0.927333	1.12816	1.18109	0.810005	0.994755	0.993225	0.711881	1.0594	0.824631	0.847359	0.784733	0.72429	1.06768
21	chr1	10793950	11339541	1.00753	1.04706	1.08112	1.24524	1.22748	1.3184	0.859382	0.916792	1.23678	1.15348	1.06268	1.04173	0.776674	1.11098	0.578602	1.00059	1.49515	0.999185	0.803912	1.04659	1.14573	0.931957	0.905733	0.939741	1.02898	1.12147	1.11778	0.712553	0.944862	1.39649	1.15397	0.995105	0.927307	1.00975	0.873097	1.11397	1.41089	1.12614	0.909655	0.971387	2.56501	0.814684	1.24574	1.0911	1.27787	1.36891
22	chr1	11339542	11889564	1.12833	1.06176	1.02325	0.933616	1.17032	1.41805	0.804424	0.741523	1.30105	1.08767	1.27341	1.02148	0.968723	1.08761	0.8932	1.04122	1.2321	1.01357	1.28054	0.98866	1.41523	1.33033	1.21838	1.0187	1.02169	1.58373	0.996496	1.10824	0.978809	1.08918	1.53863	0.900412	1.22523	1.17036	1.17238	1.03719	1.18172	1.25375	1.40495	1.00451	2.82137	1.15818	1.06377	0.888611	0.9016	1.37734
23	chr1	11889565	12416188	0.966986	1.15685	0.848015	0.943917	1.00554	1.10257	0.950441	0.722793	1.03383	1.03027	1.02869	0.964396	1.27394	1.04978	0.818702	1.09834	1.27282	0.903542	1.02463	1.11573	1.11151	1.09321	0.966416	1.0604	0.931747	1.13951	1.06669	1.20196	0.843948	1.01635	1.09706	0.99786	0.859064	0.955763	1.10241	1.00797	1.32662	0.781695	1.15051	0.856076	1.66354	0.876897	1.00077	1.31225	1.19911	1.07695
24	chr1	12416189	12936486	1.17828	1.033	0.854154	1.35373	0.945413	1.35761	0.725621	0.911994	0.946765	1.02267	1.15387	1.27284	0.894314	1.04448	0.715651	1.02584	1.41457	0.889641	1.02407	0.926172	1.23757	1.02993	0.984082	0.966131	0.946157	0.772408	1.01621	0.954009	1.18093	1.04958	1.34086	0.88643	1.06364	1.09995	1.16129	1.14323	1.09861	0.857005	0.695114	0.967799	1.65748	1.11959	1.31127	0.804905	1.15327	1.31678
25	chr1	12936487	13636282	1.11716	1.25521	0.999831	1.02063	1.24679	1.50274	1.04105	0.914945	1.21494	1.21075	1.50931	1.15788	1.09088	1.28614	0.716778	1.54209	1.34613	1.17479	1.31182	1.74633	1.35059	1.56552	1.78479	1.13566	0.868871	1.05175	0.943326	0.943097	1.18112	1.23601	1.46426	1.04785	1.01287	1.25956	1.48244	1.22335	1.51663	1.17435	1.85648	1.11916	1.43938	1.11607	1.02467	0.861194	1.29925	1.84208
26	chr1	13636283	14233689	0.940148	1.06435	0.978903	0.991558	1.10328	1.52074	0.903134	1.13589	1.13211	1.00854	0.954448	1.24455	1.23033	0.98334	0.798671	1.27169	1.53221	1.02901	1.02982	1.42574	1.28417	0.897669	1.29884	1.1624	1.0155	1.31292	0.948666	0.956179	1.05059	1.38436	1.29028	1.20192	1.15048	1.14528	1.15154	1.31372	1.68098	1.10308	1.70369	0.987846	1.27423	0.790179	1.19901	1.22978	0.705484	1.66354
27	chr1	14233690	14779206	0.926476	1.56276	0.827315	0.794705	0.873371	1.17916	0.863982	1.09627	1.12006	1.12368	1.32664	1.0778	1.21956	0.941155	0.660527	1.02665	1.3499	0.876735	1.28302	1.25333	1.35186	1.06483	0.966931	1.34238	1.1485	0.916075	0.977073	1.03268	1.2756	1.22208	1.32566	1.08854	0.842543	1.01101	0.960397	1.05295	1.62734	1.18011	1.41433	0.97817	1.26715	0.859819	1.17677	0.880002	1.36658	1.21581
28	chr1	14779207	15303889	0.913919	1.21521	1.05846	1.20975	1.13828	1.28974	0.809742	1.13083	1.35994	1.18014	0.961684	1.14727	1.17215	1.19053	0.611624	1.06302	1.30728	0.931368	1.14189	1.44328	1.15507	0.978605	0.983587	1.18877	0.883464	1.00756	1.26174	1.03038	1.18353	1.06086	1.18848	1.00381	1.00461	1.18713	1.09292	0.96757	1.24523	1.28015	1.22866	0.98908	0.352807	0.810133	0.906554	1.15423	1.14738	1.17752
29	chr1	15303890	15826550	1.02027	1.29593	1.18151	0.869735	0.939553	1.04993	0.787905	0.800681	1.25593	1.19514	1.0532	0.982942	1.28709	1.17499	0.707115	1.06157	1.094	0.936217	1.06465	1.07148	1.30292	0.877611	0.727535	1.38413	1.23645	0.858142	0.886776	1.1767	0.975592	1.02433	1.06616	0.878208	1.10857	1.12707	1.25253	1.04277	1.69452	1.08278	1.36359	0.972288	1.30698	0.990937	1.65432	1.18496	1.12466	1.06048
30	chr1	15826551	16392039	0.798787	0.955152	0.861674	0.795951	1.02234	1.20248	0.750981	0.777769	0.88627	1.01665	1.2308	1.08091	0.987208	0.714971	0.835441	1.037	1.31254	0.880884	1.24016	0.82838	1.26811	0.922293	1.07714	1.06607	1.01068	0.653569	0.878566	0.706444	0.906598	0.940861	1.04318	0.989181	0.948494	1.02477	0.970878	1.17614	1.23395	0.890116	0.987399	0.948574	0.287351	1.02855	1.30498	0.750344	1.07244	1.24254
31	chr1	16392040	16891016	1.18911	1.17415	0.999194	0.968296	0.9358	1.18121	0.939509	1.03575	1.01397	1.02506	1.33989	1.16058	0.928711	0.812129	0.858171	0.932048	1.22475	0.602983	0.984623	1.0041	1.05113	0.974312	0.970007	0.967338	0.81376	0.754766	0.742937	1.01932	1.04343	1.09646	0.922453	0.879331	1.03955	1.07516	1.01708	0.707825	1.60599	1.07474	1.12921	0.992929	0.305572	0.921925	0.827078	1.07091	0.920877	1.18262
32	chr1	16891017	17095187	1.00686	0.735179	0.822731	0.692748	0.973348	1.00033	1.40481	1.06656	1.02426	0.979537	1.11516	1.38935	0.883411	1.08366	1.29773	0.938892	1.5047	0.71374	1.02273	1.17452	1.14905	1.08326	1.20656	0.95972	0.75285	0.585088	0.80452	0.884769	1.04339	0.944024	0.882896	0.886562	0.950794	0.989449	1.01046	0.993496	0.836994	0.921103	1.16241	0.792327	0.354425	0.478819	1.15295	0.747107	1.0878	1.32233
33	chr1	17095188	17565229	0.819582	1.15064	0.737284	1.07552	0.892833	0.930773	1.09747	0.931525	1.20494	1.1534	0.893333	1.24088	1.40369	0.832623	0.972928	0.780582	0.796746	0.874489	0.890573	0.850665	0.971929	1.02214	0.696061	1.00528	0.816766	0.781278	0.835227	0.811067	1.06988	0.973838	1.02749	1.07586	0.483475	0.84415	1.00024	0.821987	1.27239	0.899757	1.17871	0.803679	0.389731	0.644356	0.628793	0.665481	1.12263	0.845431
34	chr1	17565230	18083485	1.0603	1.29069	1.09356	1.09291	1.14364	1.31388	1.27074	1.29157	1.07446	1.2341	1.07623	1.27695	1.29761	0.738342	1.50246	1.0457	0.811736	0.939373	1.14966	1.14198	1.33116	0.854482	1.3342	1.35221	0.972776	0.887695	1.16472	0.987493	1.26916	1.11496	1.22272	1.17452	1.22457	1.18283	1.05898	1.19899	1.02346	1.12239	1.48501	1.10494	1.18093	0.808005	1.16581	1.19896	1.31272	1.04241
35	chr1	18083486	18587701	1.20343	1.35515	1.14198	1.0214	1.10997	1.30836	1.02923	0.993032	0.972269	1.151	1.04497	1.07119	1.07776	1.00019	1.30844	1.11772	0.921308	0.850609	0.949434	1.2927	1.52438	1.2124	1.26781	1.21933	1.21981	1.03762	0.996405	0.754667	1.02035	1.21413	1.19405	1.09537	1.19852	1.19972	0.882139	1.02028	0.734313	1.10229	1.15229	1.29923	2.08556	0.724602	1.02278	1.19549	0.850346	1.26961
36	chr1	18587702	19113519	0.942265	0.99603	1.04274	0.995597	1.05766	1.07107	1.05821	1.09269	1.0786	0.881556	1.29407	1.20711	1.15879	0.911585	0.948468	0.95934	0.957653	0.955782	0.98466	0.989822	1.16284	1.51548	1.04318	1.12409	1.05168	1.17386	1.13398	1.10443	1.09219	1.11845	1.16289	1.32264	1.02902	1.11293	1.1059	1.00775	1.07753	1.19832	1.55571	1.01049	0.781232	0.790105	0.922953	0.607978	1.14105	1.26013
37	chr1	19113520	19594848	1.18197	0.993096	0.836063	0.915175	1.0707	1.19523	0.714774	1.26032	1.45676	1.01672	1.07222	1.05888	0.781451	1.27293	0.808566	1.0121	0.942717	0.647788	0.859305	1.02048	1.19048	1.34881	1.10639	1.14557	1.01167	0.922088	0.965379	1.04337	0.98387	1.25553	1.1526	1.21173	0.975945	1.08967	0.882625	0.895207	1.17205	1.24279	1.42916	1.10145	1.35014	0.840195	1.23914	1.25814	1.35938	1.15724
38	chr1	19594849	20112230	0.963159	0.992624	0.86336	1.15893	1.19252	1.53252	0.456328	1.18102	1.09285	1.05438	1.0287	0.931272	1.20564	1.04854	0.501094	0.992989	1.09103	1.01982	0.943823	1.02037	1.03546	1.04088	1.00986	1.02277	0.941366	0.888104	0.877143	0.769435	0.780131	1.30154	1.08652	1.2276	0.877215	1.02237	0.947429	0.915093	0.940022	0.86292	1.06899	0.868843	0.775956	0.673662	0.488592	0.942327	1.26472	1.12282
39	chr1	20112231	20626778	0.969814	1.01816	0.801882	0.887013	0.963606	1.27539	0.519709	0.948888	0.827339	0.898603	1.23177	0.995787	0.794555	0.865412	0.629446	0.930176	1.2223	0.903717	1.23693	1.13319	1.24492	1.11613	1.1462	0.930426	1.04447	1.14519	1.02197	0.725295	1.16595	1.43964	1.01411	0.959563	0.928173	1.06015	1.14879	1.1825	1.45543	1.13221	1.13576	1.06683	1.00226	0.837412	0.548894	1.19363	0.78222	1.0699
40	chr1	20626779	21153878	1.17112	1.04416	0.91654	1.01078	1.08301	1.43497	0.585855	1.08411	0.705811	0.838317	0.885794	1.00879	0.967882	0.972887	0.618454	0.974636	1.08051	0.822373	1.10817	0.866347	1.29434	1.24487	1.07072	0.991839	1.03552	1.11913	0.891732	1.01822	0.957262	0.9354	1.34982	1.21288	0.952498	1.03846	0.832248	1.09467	1.24237	1.02382	1.14209	0.984637	0.775932	1.09486	1.17817	1.29559	0.88061	0.846824
41	chr1	21153879	21724878	0.940867	1.07855	0.897623	0.663834	1.145	1.33583	0.558487	1.2948	1.15701	0.625365	1.12005	0.883589	0.816026	0.981529	0.450959	0.875135	1.41518	0.776199	1.28093	0.954061	1.10788	1.11397	1.68362	0.793965	1.02254	1.00948	0.867008	0.571552	1.05155	0.952796	1.27461	1.17222	0.785434	1.008	1.12291	1.19863	1.31634	1.16632	0.76107	0.96537	0.944551	1.11118	0.767125	0.937755	0.717337	0.624424
42	chr1	21724879	22253016	1.16242	0.977917	0.927958	1.14955	1.38867	0.880713	0.915115	0.831487	1.13629	0.832609	0.966491	0.974578	1.06516	0.74361	0.279116	0.965108	1.08919	0.750852	0.647159	0.93004	1.21094	1.0858	1.24575	0.803463	1.2594	1.0643	0.924726	1.06628	0.99439	1.047	1.13838	1.15048	0.763459	0.951622	0.812471	1.2352	0.493617	1.17872	0.956213	1.31271	0.627263	1.11	1.22474	0.831451	1.26509	0.628992
43	chr1	22253017	22782741	0.995625	0.916538	1.10427	1.09713	0.855925	1.46374	1.16016	1.55952	1.3962	1.14531	1.60433	1.08089	0.91093	0.873159	0.467014	1.10144	1.46208	1.25188	1.32681	0.927708	1.26746	1.03052	1.39901	1.38779	1.10059	1.01664	0.821452	1.05518	0.989721	1.19362	1.60962	1.0681	0.89967	1.12238	0.985621	1.11424	0.835806	1.2128	1.36497	0.834973	0.560798	1.24582	1.08914	0.68288	0.786356	0.595074
44	chr1	22782742	23305764	0.768812	0.963444	1.11549	1.29425	1.01066	1.54638	1.1588	1.28379	1.28578	1.18539	1.19966	0.867125	1.18895	1.13917	0.454597	1.03601	0.914882	1.12232	1.02603	1.12382	1.27468	1.04699	0.871108	1.27048	0.897084	1.10562	1.03159	0.90262	1.22101	1.07085	1.20596	1.03373	0.661535	1.03407	1.31553	1.23434	1.40088	0.916083	1.23634	1.16401	0.682222	0.88218	1.05473	0.840088	1.18923	1.26051
45	chr1	23305765	23866999	0.829981	1.01043	1.02033	1.10449	0.925428	1.35588	0.852859	1.08175	0.80653	1.06091	1.03176	0.908865	1.07578	0.905404	0.618364	0.892147	1.14765	0.889886	1.22139	0.878545	1.12672	0.867517	0.907939	0.990487	0.907133	0.926333	0.851702	1.15074	0.947925	1.09263	1.30814	0.918208	0.755261	1.14839	1.01467	1.23575	0.999735	0.870913	1.42056	0.809324	1.25469	0.925378	1.23917	1.26258	0.897028	0.991018
46	chr1	23867000	24468012	1.08296	1.22653	0.956642	1.17395	1.10906	1.12562	1.11647	0.951478	1.14508	0.891941	1.15726	1.13102	1.02264	1.08965	0.413837	1.04327	1.14628	0.960992	1.47668	1.31585	1.261	1.54051	1.22526	1.03979	0.781057	0.955855	1.03598	0.850976	0.897492	1.41942	1.21226	1.04917	0.83209	1.14689	0.984903	1.15027	1.70451	0.999992	1.00187	1.24569	0.761227	1.05568	1.23973	0.678135	1.03563	0.897597
47	chr1	24468013	24984290	1.00071	1.17503	1.07807	1.22062	0.922483	1.22624	0.892937	0.979575	1.29516	0.936196	0.952988	0.91257	0.723627	0.765805	0.651316	0.981781	1.39722	1.10941	0.771602	0.897994	1.16109	1.19356	1.22189	1.0202	0.97108	0.968302	1.08793	0.735556	1.03732	1.42658	1.02909	0.877755	1.30089	1.00686	0.91066	1.04695	1.31935	1.12299	1.04741	1.03807	1.25581	0.9708	1.04724	0.814268	0.713643	0.915391
48	chr1	24984291	25535135	0.761739	1.41322	0.940219	1.34407	0.856438	1.51621	1.04172	1.42101	1.37063	1.23417	1.13404	1.20234	1.21125	0.899753	0.576896	0.905918	1.47381	0.770703	0.906987	1.21445	1.15662	0.749214	1.43224	0.848426	1.06059	1.11522	0.978052	1.0627	1.41963	1.40534	1.06383	1.2401	0.843786	1.10703	1.01919	1.17826	1.30065	1.08092	1.13164	0.937203	1.64912	0.77977	0.93062	0.92351	0.640006	1.227
49	chr1	25535136	26072297	1.08406	1.35061	1.02371	1.33074	0.97738	1.77319	1.00071	0.859037	1.44516	1.01791	1.12256	0.910292	0.991865	1.11697	0.512624	1.11352	1.55046	0.753892	1.35195	1.14293	1.32673	1.25699	1.08688	1.37687	1.1915	1.5395	0.986925	0.971559	1.183	1.45233	1.13745	1.30511	1.10913	1.10968	0.901368	1.33727	0.781727	1.1953	1.21531	1.13912	1.04775	0.997059	1.23276	1.14247	1.0061	1.23186
50	chr1	26072298	26616722	0.875239	1.18738	0.91607	0.896683	1.04873	1.03613	1.0106	0.700856	1.19905	1.15853	1.34554	0.866688	0.735203	0.96303	0.586846	0.997859	1.37022	0.861345	1.33419	1.27319	1.21305	1.41748	1.18948	1.11142	1.19661	1.16129	1.04028	1.18871	1.1276	1.17087	1.20723	1.21344	1.17351	1.01489	0.971548	1.18942	0.967868	0.943381	1.27277	0.930613	0.372898	0.641599	0.963513	1.15448	1.03338	1.25251
51	chr1	26616723	27190656	0.893653	1.23003	0.904101	1.28474	0.854378	0.889478	1.02158	0.499921	1.13361	1.03067	1.15916	1.02165	0.782103	0.913404	0.589271	0.966377	1.271	0.995874	1.2583	1.05913	1.25322	1.11651	1.2528	1.13228	1.08382	0.943333	0.911648	0.869296	1.09048	1.13768	1.03819	1.25968	1.12663	1.01567	0.858101	1.24246	1.46154	1.07387	1.2282	1.1134	0.577116	0.690653	0.964134	0.776721	0.778281	1.02784
52	chr1	27190657	27754800	1.20193	0.851228	0.6233	0.943752	0.678045	1.4099	1.09713	0.58766	1.46885	1.08983	1.37709	1.22255	1.14329	0.975567	0.572829	1.03326	1.093	1.03912	1.04549	1.07086	1.19215	1.32331	1.07637	1.01337	0.975893	1.44206	0.774274	0.788746	0.82537	1.15009	1.00257	0.954723	1.19453	1.02986	1.20708	1.10038	1.4455	1.2827	1.20681	0.896879	0.475636	0.841069	0.92721	0.743882	1.39793	1.09147
53	chr1	27754801	28337819	0.955376	1.04111	0.892135	0.916425	0.610719	1.05067	1.08154	0.744081	1.08582	0.982909	1.24735	0.983634	0.658415	0.950949	0.511162	1.03055	1.20653	0.728345	1.00655	1.08266	1.28262	0.861188	1.3181	1.07322	1.18131	0.859149	0.96745	1.1387	0.945594	0.886318	1.11518	0.869301	0.935524	1.14306	0.867351	1.07447	1.04642	1.28953	1.13755	1.04073	0.466399	0.773292	0.845459	0.717132	0.930867	1.22776
54	chr1	28337820	28925275	0.951003	1.26917	0.849031	1.01436	0.821437	1.61673	0.903918	0.529514	1.18646	0.92318	1.06135	1.13346	1.26958	1.25307	0.607845	0.950901	1.35681	0.943961	1.06002	1.03751	1.10309	1.05264	0.974683	1.0827	0.979456	0.903866	1.14422	1.13278	0.996544	1.34147	1.24928	1.29782	1.00485	1.12302	1.11373	1.13406	1.30615	1.28755	1.00379	0.775469	0.553015	0.922479	0.877192	0.62839	1.10833	0.947481
55	chr1	28925276	29525195	0.91963	1.07564	0.978821	0.881923	0.896658	1.17996	0.95143	0.824123	1.21444	1.04986	1.32781	1.09136	0.876489	1.08165	0.6237	1.20745	1.06078	0.949779	0.831376	0.944354	0.957127	1.12673	1.22527	0.81946	1.21841	0.992898	0.920592	1.06221	0.871531	1.06864	0.991531	1.26202	1.10638	1.09478	0.925837	1.12283	1.24288	1.07577	1.11343	0.951112	0.724797	0.689275	1.19926	0.983484	0.987996	1.06661
56	chr1	29525196	30186066	0.973983	0.903098	1.07432	0.86747	0.90028	0.684222	0.683618	0.873372	1.04687	1.44535	0.901021	0.982085	0.985583	0.931198	0.594957	1.11344	0.903206	0.901051	0.898541	1.07831	1.09195	1.30909	1.10347	1.11386	0.940902	1.09821	1.14131	1.02222	1.00947	1.42249	0.976569	0.886107	1.14993	1.05707	1.0483	0.992262	1.17009	0.994024	0.701092	1.02471	0.57399	0.872516	1.27017	1.18056	1.1579	0.862173
57	chr1	30186067	30712617	0.800122	1.32477	1.06071	0.9152	1.21703	0.832757	0.904352	0.949902	1.03365	1.31114	1.2336	1.25863	1.19624	1.27913	0.885058	1.2739	1.09025	0.751	0.860533	1.18108	1.30101	0.959674	1.05409	1.03776	1.0426	1.12175	0.920962	1.3062	1.01499	1.33243	0.907514	1.07752	1.30011	1.20693	1.04217	0.882087	1.59737	1.22888	1.49809	1.03637	1.15355	1.02769	1.07052	1.35467	1.35635	1.06222
58	chr1	30712618	31230675	0.885945	1.26118	0.930979	1.1508	1.0716	0.50797	0.994521	1.23523	0.910316	1.24421	1.33941	0.996202	0.831798	0.51991	0.716895	1.08265	0.710121	0.972137	1.33981	1.28979	1.21193	1.24166	0.855227	1.2105	1.03611	0.890332	1.09366	1.30517	0.940813	1.27861	1.21784	1.14301	1.25542	1.0397	1.35876	0.856329	1.11397	1.11044	1.19738	0.789949	0.742596	0.988095	0.800071	0.977958	1.07662	1.03297
59	chr1	31230676	31776539	0.894628	0.991809	0.840895	1.37348	0.888013	0.940552	1.03183	1.17033	0.860303	1.09821	1.24061	1.24354	0.903168	0.971203	0.634157	1.13209	1.07269	0.902556	0.864044	1.18994	1.29823	1.2181	0.642475	0.946099	1.07356	1.38888	0.879101	0.918013	1.25465	0.940638	0.834454	1.24354	1.14228	1.09523	0.74589	1.14429	1.25467	1.12159	1.20673	0.91537	1.40587	0.777028	1.24559	0.745251	1.27523	0.754825
60	chr1	31776540	32278682	0.831548	1.08442	1.2242	1.14694	0.868309	0.843618	1.06769	1.01372	0.810642	0.902765	0.888217	1.12957	0.979871	0.935559	0.529173	1.05077	1.14325	0.797738	0.804118	1.08247	0.862394	1.2369	1.24133	0.925154	0.96003	1.03415	0.894906	0.802928	0.832955	1.26175	1.04846	1.03849	1.19972	1.04212	0.947356	0.981584	1.87262	0.924038	1.17338	1.2622	1.80131	0.697689	1.00119	0.723252	0.994721	1.0278
61	chr1	32278683	32824485	1.01112	1.02906	0.749839	0.81462	0.959578	0.891601	1.06286	1.31813	1.06921	0.925533	0.925847	0.989378	1.00447	1.12514	0.534363	1.03277	1.38312	0.892164	1.02387	1.01432	1.1363	0.978514	0.823121	1.11196	0.692028	0.809932	1.12009	1.00634	0.89098	1.29908	1.27366	1.06499	0.816448	1.03508	0.795813	1.36282	1.38362	1.25462	0.94344	0.896415	1.35664	0.744852	1.10429	0.9686	1.12636	1.01238
62	chr1	32824486	33411502	0.921202	0.855371	1.05502	1.00169	0.825129	1.26822	0.753927	1.18971	1.02559	0.769158	0.868376	0.974052	0.913747	1.01242	0.493118	1.11392	1.32785	0.74212	1.15862	0.914343	1.18141	0.958284	1.16542	1.16589	1.21684	0.863108	1.23084	1.03316	0.773266	1.15553	1.31516	1.45779	1.196	0.987852	0.812149	1.18513	0.98085	0.935946	1.04109	1.02666	0.92191	0.769799	1.18491	1.11272	0.958819	0.772543
63	chr1	33411503	33958687	0.792089	1.00393	0.911367	1.11922	1.05086	1.19583	0.481935	1.39694	1.06775	0.914944	0.905519	1.21311	0.87745	1.00038	0.670518	1.08058	1.38159	0.893436	1.13633	0.893264	1.27327	1.01791	0.985291	1.01897	1.07311	1.06599	0.861728	1.10122	1.00747	1.24008	1.2803	0.970131	0.846507	0.934956	0.887282	1.05654	0.554918	1.0717	1.51655	1.19486	0.692259	0.721295	0.956369	1.18365	0.811282	1.36089
64	chr1	33958688	34452171	0.951139	0.814631	1.15266	0.835862	1.63065	1.31746	0.988568	0.917028	1.25565	1.0163	1.12376	1.21448	0.825599	0.958828	0.709886	0.930213	1.22573	0.841214	1.09072	0.722059	1.28837	1.39473	0.8606	1.1035	0.790164	0.926324	1.03292	0.935449	1.12971	1.02794	1.09965	0.856363	1.01734	1.00282	0.855133	1.03448	1.21321	1.22507	1.18106	0.951679	1.06815	0.899359	1.03488	0.879271	1.24857	1.21221
65	chr1	34452172	34989422	0.892562	1.31189	0.761788	0.964994	1.20014	0.990236	1.05521	1.09215	1.04323	1.00227	1.52939	1.13814	0.964313	0.987867	0.471674	0.944348	1.42006	1.04441	1.02483	0.845225	1.29437	1.42155	0.700657	1.07348	1.18661	0.901847	1.04576	1.01658	1.21545	0.879109	1.14129	1.36137	1.15499	0.918758	0.716294	1.22366	1.19754	0.92203	1.07352	1.11463	1.84376	0.876698	0.865798	1.10985	1.14154	0.923739
66	chr1	34989423	35549642	0.738863	1.04674	0.971021	1.01609	1.16474	1.12765	1.00361	1.19147	0.993259	0.750077	0.915302	1.10289	1.0587	1.06379	0.597775	0.866109	1.06478	1.0056	1.10237	0.95033	1.18171	1.02289	1.0391	1.29157	0.930294	1.59986	0.977304	0.937838	1.09575	1.37894	1.13653	1.1744	0.822437	0.921702	0.907771	1.19018	0.698468	1.03217	1.00053	1.10427	1.49551	0.630034	1.07611	1.5423	1.11499	0.864084
67	chr1	35549643	36138499	1.006	1.17769	1.01278	0.993884	0.92552	1.0353	0.453961	1.03037	1.12364	0.738115	1.25083	1.01872	0.876502	0.856064	0.505135	0.873794	1.51517	0.765615	0.901804	1.06144	1.09666	0.991559	0.78887	1.35797	0.84872	1.09423	0.840847	1.02584	1.09891	1.30935	1.01495	1.12747	1.44802	0.983809	0.813952	1.17074	0.921766	0.802228	0.97712	1.23995	1.29477	0.877519	0.983863	0.65741	1.13738	1.38502
68	chr1	36138500	36727231	0.908966	1.04416	0.786205	0.904667	0.707033	1.10934	0.868337	1.11522	0.644276	0.977773	0.970562	1.09264	1.02115	1.01092	0.543519	1.18206	1.38102	0.811678	1.0426	1.14601	1.23252	1.32228	0.841707	1.0081	1.16072	1.14094	1.15833	0.597947	1.00842	1.15829	0.995922	1.01051	1.07086	0.871694	0.874053	1.17084	1.24679	0.973697	1.29541	1.07041	1.53181	0.710159	0.959817	0.628925	1.18833	0.945909
69	chr1	36727232	37235739	0.875436	0.940013	1.07732	0.833633	0.74258	0.847328	0.728675	1.35173	1.13848	1.34443	1.05557	0.957969	0.916479	0.976359	0.588391	1.01899	0.843927	0.743669	0.9893	0.885485	1.23784	1.66973	0.935586	1.10195	1.10667	0.872578	1.18238	0.83369	1.12943	1.61602	1.1362	0.844954	1.1052	1.05174	0.935861	1.19787	1.2141	0.965228	1.61166	0.790343	2.1586	0.718109	1.20135	0.509039	1.45964	1.08904
70	chr1	37235740	37748931	1.08798	1.28028	1.18761	0.978347	1.09049	1.18282	0.725948	1.26742	1.07102	1.44295	1.43308	1.13417	1.07754	0.683558	0.820115	1.07379	0.612461	0.924483	1.19452	1.21548	1.4284	1.39518	1.23319	1.13603	1.06071	1.23316	1.01807	1.03733	1.11624	1.7203	1.50569	1.09371	1.18282	1.07406	1.10335	1.22031	2.09662	1.06215	1.40183	0.973359	0.832757	1.01124	1.40637	0.9944	1.14288	0.76882
71	chr1	37748932	38289538	0.892255	1.14398	1.0051	1.12561	0.979318	1.34925	0.601614	1.44023	1.00849	1.07406	1.11743	1.32702	1.21241	0.671367	0.917719	0.928499	0.996296	0.747252	0.886081	1.07986	1.21433	1.45715	0.853245	1.21646	0.942788	1.27224	1.1206	1.10569	1.13868	1.44664	1.4067	1.03008	1.13858	0.986399	1.22096	1.01557	0.891307	1.36707	1.10691	1.10845	1.25792	0.837443	0.929718	1.38212	1.1899	0.732414
72	chr1	38289539	38829953	0.891784	1.1687	1.00419	0.841852	0.894957	0.934201	0.654692	0.809008	1.02111	0.898996	1.05336	1.04143	1.07003	0.812088	0.656896	1.00778	0.956095	1.03415	1.20056	0.874825	1.30535	1.01828	1.0561	1.18282	1.06992	0.937031	1.10383	1.04152	1.22388	0.916952	1.37176	1.41189	0.442874	0.981282	1.21474	1.10197	1.16052	1.05602	1.36037	0.750285	0.914894	0.56659	1.01553	1.086	1.41014	1.46903
73	chr1	38829954	39368644	1.14401	1.02796	0.860869	1.25274	1.02299	0.655453	0.543546	1.05164	0.816739	0.822369	1.01068	1.04515	0.620901	0.976314	0.67899	0.899582	0.549562	1.04441	1.16774	0.804437	1.07203	1.13022	0.978222	1.31467	1.15944	1.11894	1.02748	0.973525	0.839688	1.00313	1.40604	0.901861	0.595962	0.886372	0.875851	1.18668	0.745401	1.00042	1.03164	0.741747	1.66237	0.678084	1.14144	0.96874	0.845009	0.976578
74	chr1	39368645	39955961	0.95448	0.846159	0.920245	1.17295	0.986088	1.3955	0.69148	1.07252	0.836386	0.978887	1.33387	1.41588	0.948035	0.91178	0.523231	1.00807	1.27255	0.991615	1.12748	1.09952	1.17791	1.30889	0.993502	1.07557	0.985768	1.43474	0.844593	0.84912	1.43266	1.19559	1.25939	1.24186	0.901806	1.04994	1.12921	1.22358	1.22488	0.929457	1.16611	0.758391	1.47474	0.820272	1.07054	1.07816	0.874776	1.17272
75	chr1	39955962	40517524	1.262	0.949846	0.777975	1.02484	1.05404	1.40093	0.74466	1.03699	0.601583	0.965128	1.09775	0.999461	0.718743	1.12635	0.71316	0.887149	1.353	0.657835	1.05016	1.1771	1.3353	1.23305	0.983774	1.28827	0.872155	1.31993	1.16073	0.992554	0.952031	1.26926	0.924634	0.988275	0.787395	0.941648	0.836239	1.23064	1.10081	0.960867	1.30337	0.782157	1.39349	0.835174	0.983935	1.03135	0.96623	1.09821
76	chr1	40517525	41094253	0.943466	1.07412	0.866178	0.967652	0.90645	1.30205	0.672722	1.26688	0.692273	0.854102	1.2302	0.906609	0.969346	0.963956	0.627445	0.966741	1.26619	0.67632	1.00419	0.824348	1.22751	1.15962	1.3165	1.15897	1.05761	1.12825	0.946271	0.925948	1.10811	1.30371	1.15594	0.851667	1.07639	1.00565	0.805006	1.22468	1.3002	1.24617	0.775324	1.08225	1.53653	0.71781	0.920246	0.932601	0.930252	1.26395
77	chr1	41094254	41646374	0.894985	0.956481	0.827988	0.808752	1.11151	1.97971	0.688153	1.3643	0.989386	0.761033	0.740937	1.06723	1.01379	1.12011	0.772422	1.07924	1.31924	0.860709	1.11746	0.834515	1.14281	1.10832	1.15043	0.982283	1.03767	1.19144	0.873609	1.0181	1.05829	1.23271	1.01544	1.09607	1.40679	1.053	0.923048	1.2442	1.12255	1.07515	1.06246	1.00543	1.15121	0.771508	0.931647	1.01328	0.978772	0.79375
78	chr1	41646375	42165436	1.12733	0.953979	1.0891	0.912527	0.912636	1.43547	0.94961	0.929413	0.865159	0.930065	0.785845	1.10598	1.05284	0.631557	0.74621	0.942701	1.55291	1.0199	1.51805	1.00112	1.40302	1.30631	1.49421	1.20865	0.941349	1.06561	1.18418	1.35802	0.98125	1.1332	1.12693	0.916952	0.902189	0.954166	1.0754	1.09437	1.007	1.4333	1.26312	1.02336	1.43387	0.82512	0.862366	1.09948	1.33274	1.10427
79	chr1	42165437	42694462	0.867793	0.754239	0.953195	0.88614	0.712489	1.47774	0.966112	1.0937	0.634901	0.818773	0.784754	1.15461	0.904057	1.04937	0.914083	0.98402	1.22982	0.866388	0.734047	1.12001	1.22774	0.893018	1.09672	1.33846	1.13803	0.986613	0.797534	1.02092	1.01063	1.38078	1.01276	0.883997	0.955379	0.946078	0.929946	0.876343	1.19689	1.04978	1.39553	1.21761	1.01017	0.591499	0.660795	0.824894	1.03337	1.24866
80	chr1	42694463	43249010	0.404472	0.349	0.562651	0.981482	0.330777	0.926859	0.175037	0.59523	0.942103	0.543168	0.369867	0.603837	1.26375	0.318788	0.682255	0.485247	0.603958	0.33141	0.922091	0.909018	0.620168	1.06332	0.529526	0.676369	0.859926	1.23252	0.570246	0.908391	0.530279	1.10856	0.66125	0.838629	0.612473	0.391817	0.356252	0.457616	1.30044	0.437577	0.60146	1.0337	1.21186	0.359585	0.91564	0.901888	0.966444	0.584597
81	chr1	43249011	43794406	0.467597	0.417105	0.617824	1.12463	0.431025	0.94804	0.32721	0.661388	0.811127	0.619864	0.386037	0.558268	0.792983	0.473709	0.902546	0.552837	0.690807	0.468617	1.00529	0.839088	0.54271	1.37948	0.527167	0.635963	0.756943	0.677008	0.551091	0.731157	0.475322	0.837248	0.536488	0.95574	1.01179	0.523605	0.524046	0.548477	0.727108	0.57078	0.706863	1.05395	0.415702	0.382153	0.797771	0.882214	1.1245	0.65663
82	chr1	43794407	44316124	0.410331	0.41194	0.405702	1.079	0.437617	0.588287	0.550661	0.588126	0.665741	0.507635	0.567309	0.601042	0.728288	0.481076	0.840182	0.666112	0.694946	0.389495	1.2283	1.22039	0.651792	1.61854	0.699949	0.66068	1.01987	0.677441	0.565987	1.02124	0.436468	0.736567	0.588873	0.863671	0.941034	0.429004	0.513191	0.446037	1.10961	0.6458	0.525313	1.11023	0.85394	0.300941	1.1549	0.676668	1.20349	0.732432
83	chr1	44316125	44825171	0.488879	0.377033	0.485901	0.989464	0.562395	0.609486	0.627769	0.535029	0.851362	0.508588	0.687542	0.452809	1.17553	0.507022	0.765092	0.504167	0.548975	0.344832	0.781068	0.966239	0.629171	1.18378	0.502728	0.636729	1.22778	0.587227	0.527227	0.877405	0.543228	0.858365	0.670532	0.853981	1.10966	0.501253	0.560271	0.425384	1.00938	0.436808	0.645622	1.21318	0.786428	0.3962	0.957699	0.718769	0.759924	0.696209
84	chr1	44825172	45381782	0.570925	0.63533	0.470483	0.9372	0.521508	0.392749	0.463361	0.794223	0.726684	0.676089	0.52342	0.612045	1.00479	0.253246	0.874712	0.5794	0.53203	0.417729	1.04175	0.989215	0.537404	1.15814	0.408907	0.854002	0.736328	1.17824	0.508772	0.954052	0.542081	0.935623	0.64356	0.800215	1.30875	0.473413	0.51085	0.455289	1.41448	0.477067	0.60806	1.12676	1.31872	0.324127	0.788894	1.12572	0.814174	0.311439
85	chr1	45381783	45982407	0.513113	0.701819	0.49255	0.96523	0.418855	0.559316	0.255687	0.539156	0.867967	0.680724	0.633101	0.699571	0.961941	0.413553	0.514871	0.67913	0.775003	0.447535	1.07934	0.941852	0.574352	1.41356	0.526983	0.674947	1.14107	0.93963	0.371344	1.0392	0.497663	1.24647	0.624203	1.08993	1.23083	0.489739	0.446479	0.557896	1.45864	0.62255	0.58455	1.13967	1.4454	0.247202	1.14063	1.01269	1.21955	0.744044
86	chr1	45982408	46555657	0.42292	0.653543	0.344062	1.22412	0.489048	0.824493	0.564847	0.613202	0.925881	0.530788	0.520933	0.609895	0.811962	0.563563	0.504023	0.581574	0.581121	0.444175	1.00613	0.973228	0.597676	0.87766	0.819097	0.615562	1.38204	0.813453	0.344021	0.888626	0.495108	1.32465	0.478102	0.943514	0.7993	0.523007	0.447037	0.383687	1.41667	0.541483	0.677098	1.07021	0.934565	0.267104	0.651726	1.07909	0.968352	0.693356
87	chr1	46555658	47105707	0.514421	0.554277	0.438388	1.28153	0.53543	0.802368	0.351543	0.638749	0.956286	0.605658	0.68573	0.581902	1.13763	0.379145	0.671926	0.672577	0.709855	0.50432	1.27274	1.11661	0.559171	1.38752	0.464859	0.82146	1.10616	0.781758	0.394677	0.882238	0.448944	0.98997	0.310501	1.22779	1.12815	0.461133	0.550618	0.358996	0.90685	0.453424	0.632003	0.965242	0.910828	0.328538	0.890552	0.706579	0.564295	0.718123
88	chr1	47105708	47670062	0.466886	0.645944	0.462062	1.05496	0.733016	1.01915	0.314718	0.459415	0.74375	0.509173	0.495054	0.732542	1.16799	0.45996	0.506837	0.666288	0.884214	0.499586	0.753574	0.974797	0.775044	0.905577	0.553188	0.621735	0.8948	0.976319	0.49079	0.845376	0.454139	1.40265	0.292305	0.724503	1.4257	0.481242	0.414626	0.382264	1.49389	0.628261	0.55538	0.897012	0.81866	0.383944	1.05239	0.59929	1.09842	0.480964
89	chr1	47670063	48225609	0.406605	0.70086	0.428151	1.58293	0.366518	0.596796	0.363021	0.468182	0.816694	0.563102	0.296839	0.560298	1.0403	0.678975	0.921394	0.672928	0.493301	0.63362	0.855373	1.11172	0.60653	1.15505	0.476914	0.630121	0.899054	0.911924	0.558687	0.838395	0.443226	1.21378	0.550886	1.1614	1.15832	0.593787	0.55109	0.489957	1.41507	0.418962	0.704479	1.23398	0.4007	0.542878	0.945167	1.16028	0.835125	0.590212
90	chr1	48225610	48777902	0.517181	0.528476	0.620094	0.942553	0.756835	0.955848	0.388358	0.697893	0.885483	0.45972	0.725348	0.541239	1.04405	0.626752	0.949383	0.657845	0.630189	0.593409	1.07359	1.25766	0.505121	0.860756	0.752353	0.731672	1.06204	0.910177	0.62857	1.04269	0.526608	1.59328	0.584779	1.27722	1.26045	0.543496	0.618201	0.481971	0.743028	0.414034	0.658058	1.26403	1.24948	0.628804	1.30505	1.40829	1.22598	0.616321
91	chr1	48777903	49334779	0.584494	0.701969	0.756791	1.19612	0.489491	0.883131	0.273826	0.505572	0.920552	0.640376	0.374306	0.598507	0.85689	0.403767	0.85459	0.636056	0.859052	0.510439	1.1584	1.29108	0.652625	1.04433	0.712432	0.539245	0.724262	0.783226	0.546252	0.989586	0.53948	1.35748	0.597057	1.10002	0.801393	0.550113	0.536688	0.459832	0.862867	0.551794	0.513643	1.18885	0.71473	0.51412	0.715146	0.966843	1.10249	0.495431
92	chr1	49334780	49945727	0.425418	0.527991	0.362219	0.986862	0.342547	0.94758	0.382409	0.523732	1.18051	0.49178	0.718721	0.769514	0.973808	0.467952	0.866714	0.54737	1.11555	0.440821	0.769037	1.4654	0.676268	1.28189	0.632679	0.654417	1.10504	0.80434	0.642384	0.855256	0.422391	1.91026	0.889595	0.998825	1.1495	0.571333	0.458227	0.445174	1.60196	0.614505	0.635421	1.31422	0.656904	0.485313	1.01851	0.874266	1.0937	0.432367
93	chr1	49945728	50600828	0.479429	0.624899	0.578145	0.809932	0.75554	0.847927	0.286294	0.6095	0.516343	0.491367	0.495362	0.737934	1.03207	0.311228	1.01525	0.596626	0.679073	0.421194	1.19922	1.10157	0.59658	1.08018	0.765305	0.838669	1.11986	0.744042	0.49301	1.1667	0.499824	1.81852	0.584202	1.05224	1.24214	0.553388	0.663931	0.488342	0.966039	0.690053	0.854206	1.07818	0.832646	0.469072	0.880148	0.986031	0.935305	0.55402
94	chr1	50600829	51151005	0.506569	0.570208	0.39103	1.04643	0.477273	0.833924	0.268137	0.599481	0.857679	0.418165	0.454742	0.621866	0.790585	0.523472	0.937391	0.592962	0.651607	0.446539	0.797221	1.28894	0.531395	1.26213	0.792365	0.663313	1.09805	1.1686	0.520511	1.03073	0.422666	1.68407	0.650135	0.937292	0.77915	0.471864	0.639134	0.528447	0.986227	0.574935	0.512054	1.04634	0.682519	0.535445	1.13405	1.15853	1.19829	0.533899
95	chr1	51151006	51757726	0.438338	0.571928	0.547877	1.18811	0.557568	0.794285	0.246466	0.517666	0.743723	0.469245	0.75165	0.549713	1.0159	0.687624	0.748024	0.647543	0.674263	0.568494	0.952198	0.867001	0.656611	1.1535	0.395803	0.660547	1.0556	0.930921	0.453268	1.23715	0.585978	1.33908	0.694106	1.03915	1.09905	0.482253	0.431421	0.596519	1.09197	0.569764	0.565326	0.91875	0.114182	0.488073	1.30941	0.783074	0.936844	0.734408
96	chr1	51757727	52332791	0.527641	0.578588	0.330511	1.27656	0.502902	0.5564	0.276474	0.645255	1.33746	0.41768	0.304526	0.429043	0.968864	0.509308	0.735606	0.588755	0.829551	0.395999	0.720316	1.15615	0.565344	0.852997	0.635504	0.676403	1.03399	0.613776	0.654172	0.665078	0.549537	1.35543	0.461905	1.04757	0.894482	0.532421	0.440169	0.519723	0.96257	0.61386	0.538329	1.08486	0.700802	0.594738	0.776809	0.936244	0.960942	0.605503
97	chr1	52332792	52882385	0.543315	0.668113	0.433436	1.37822	0.500602	0.812155	0.244967	0.521552	0.934982	0.357418	0.581482	0.634547	1.00297	0.542083	0.555559	0.522682	0.902451	0.536083	0.90272	1.00184	0.450546	0.85591	0.851638	0.747943	0.954705	0.905681	0.522076	1.08328	0.609007	1.28722	0.414632	0.960424	1.31443	0.489846	0.377057	0.538463	0.832056	0.613936	0.785472	0.850004	1.12415	0.450662	0.944252	0.811719	1.13019	0.554305
98	chr1	52882386	53464136	0.45889	0.516849	0.333743	1.14206	0.55573	0.656925	0.203026	0.580371	0.801024	0.415929	0.552528	0.573721	0.846005	0.551989	0.518706	0.569077	0.889222	0.377337	0.921167	1.16192	0.466404	1.46193	0.811826	0.832914	1.1572	1.14618	0.572364	0.981078	0.637619	1.18053	0.730113	1.04337	0.91978	0.564188	0.580922	0.336797	0.943186	0.34443	0.599842	0.930951	1.39144	0.243517	0.958479	0.910604	0.854734	0.845546
99	chr1	53464137	53974370	0.467998	0.498205	0.663927	0.988447	0.452184	0.576281	0.266501	0.499263	0.948776	0.651762	0.492361	0.500453	1.07265	0.380502	0.492575	0.546501	0.599718	0.355223	0.990111	1.21366	0.487003	0.993293	0.578118	0.913493	1.01338	0.923908	0.504594	1.06523	0.656274	1.16448	0.496448	1.08518	0.798472	0.501687	0.421883	0.455106	1.50121	0.491553	0.590556	1.03454	0.5612	0.285789	0.819445	0.734527	1.15123	0.366393
100	chr1	53974371	54490830	0.420654	0.495607	0.421974	0.817358	0.7625	0.974568	0.240898	0.57927	0.75406	0.699709	0.412647	0.495095	1.19256	0.462306	0.640743	0.649919	0.792805	0.492695	0.933844	1.16165	0.532775	1.25688	0.905933	0.750661	0.905388	1.2899	0.535514	0.927952	0.620758	1.1605	0.592119	1.06989	0.779398	0.51215	0.506479	0.44563	1.20456	0.604725	0.541282	1.13918	1.31017	0.364796	1.03568	0.552338	1.26375	0.404467
101	chr1	54490831	55017871	0.656648	0.451419	0.504269	1.36062	0.462342	0.731882	0.0369695	0.426602	1.38846	0.654335	0.400307	0.728645	1.01931	0.428458	0.680821	0.760254	0.562314	0.428227	1.12511	1.0975	0.465833	0.797083	0.683802	0.804952	0.988125	1.06385	0.541213	1.02081	0.604639	1.18131	0.647033	1.0048	0.82573	0.540805	0.460478	0.456503	1.10492	0.555591	0.702355	0.772981	1.24891	0.285632	1.21049	1.21891	0.906408	0.440807
102	chr1	55017872	55545268	0.382963	0.463509	0.412304	0.784367	0.57219	0.895586	0.135864	0.521325	0.683012	0.47416	0.770103	0.522475	1.17111	0.443805	0.652604	0.648823	0.616983	0.415471	0.906878	0.712245	0.47649	1.11985	0.895131	0.698409	0.894771	1.1931	0.437821	0.946089	0.423499	1.30861	0.676369	1.21591	0.954414	0.481712	0.525607	0.441398	0.742099	0.555627	0.561724	1.07938	1.29875	0.405489	1.20109	0.743824	0.785762	0.609037
103	chr1	55545269	56071292	0.312726	0.541455	0.323874	1.1521	0.449884	1.06794	0.233866	0.52602	0.909493	0.599022	0.63494	0.598139	1.02009	0.505064	0.549432	0.578925	0.824068	0.283052	0.826753	0.94419	0.632603	0.981592	0.454275	0.683669	1.05118	1.06592	0.444984	0.774031	0.451482	1.19054	0.679993	1.29206	0.793246	0.529154	0.513137	0.42041	1.11013	0.585154	0.544668	1.11376	0.967035	0.311084	0.959858	0.893388	1.06086	0.70831
104	chr1	56071293	56612909	0.492418	0.574287	0.45205	1.03642	0.679982	0.692961	0.232596	0.632989	0.996959	0.660632	0.652932	0.618495	0.951529	0.410856	0.874729	0.574284	1.00178	0.413328	1.01656	0.966362	0.646263	0.761921	0.646161	0.731118	0.83983	0.654114	0.467466	1.03166	0.606722	1.06432	0.762058	0.997993	1.31539	0.506629	0.420195	0.450755	1.41807	0.563487	0.418333	0.993994	0.578463	0.327364	1.04587	0.971365	1.13692	0.726402
105	chr1	56612910	57165721	0.566904	0.515203	0.589316	0.765594	0.503356	0.576791	0.210481	0.821467	1.01831	0.660791	0.554454	0.714495	0.663503	0.496412	1.02659	0.542718	1.07219	0.450598	1.31973	1.01526	0.76905	1.13144	0.423923	0.721614	1.10594	0.846308	0.395637	0.664247	0.495898	1.22959	0.597016	0.930923	0.810674	0.481225	0.586382	0.39149	1.37951	0.523003	0.45087	0.960106	1.35838	0.401175	1.00123	0.997698	1.28113	0.76276
106	chr1	57165722	57675614	0.553566	0.610215	0.40805	1.02631	0.431513	0.668955	0.238894	0.545767	0.597275	0.690443	0.656665	0.566104	0.677741	0.313863	0.663406	0.518657	0.676627	0.402447	1.06806	1.21869	0.689358	0.979988	0.573914	0.875662	1.08415	0.842787	0.498517	1.15907	0.57878	1.09032	0.66235	1.34962	1.30036	0.493382	0.330476	0.530938	1.06029	0.407836	0.689645	1.17736	0.223486	0.438147	0.963969	0.599332	0.961954	0.635271
107	chr1	57675615	58207672	0.589664	0.632067	0.356775	1.04668	0.640023	0.843117	0.302846	0.575963	1.03057	0.70621	0.454101	0.553706	0.979776	0.331957	0.808438	0.573502	0.754821	0.431776	1.12538	0.766316	0.587554	0.647762	0.476077	0.806357	1.01296	1.00292	0.377008	1.16629	0.41361	1.30832	0.610996	1.49775	1.1149	0.538586	0.581847	0.428456	1.38478	0.590375	0.853405	0.978449	0.444395	0.447052	0.634934	1.08553	1.12249	0.63878
108	chr1	58207673	58753761	0.565454	0.634444	0.288299	1.06734	0.424921	0.501137	0.323638	0.759698	0.763886	0.655142	0.694277	0.743746	0.920281	0.585082	0.752693	0.716564	0.818538	0.603325	1.02928	1.12122	0.695055	1.24319	0.764898	0.944601	1.06058	0.960048	0.539793	1.08957	0.559427	1.53388	0.725206	1.10575	1.12781	0.521431	0.491087	0.670734	1.06102	0.74444	0.702161	1.09859	1.09477	0.404803	1.14191	1.42987	1.30705	0.613802
109	chr1	58753762	59296770	0.458829	0.694199	0.606327	0.98211	0.475941	0.78349	0.297525	0.487449	1.07928	0.607575	0.577751	0.525834	1.15784	0.429542	0.510502	0.55366	0.988961	0.457588	1.05277	1.07421	0.615251	0.813161	0.66097	0.942827	0.747581	0.930701	0.374743	1.23923	0.443034	1.45577	0.698146	1.08118	1.40756	0.566888	0.495621	0.444066	1.1405	0.596292	0.615671	1.22264	1.26732	0.354793	1.03496	1.05952	1.12697	0.610826
110	chr1	59296771	59806590	0.387554	0.562222	0.48694	0.99477	0.45962	0.644535	0.356512	0.517558	1.06404	0.583441	0.56243	0.723776	1.10373	0.473288	0.480523	0.566015	1.05002	0.327659	0.831193	0.899098	0.508945	0.850779	0.590164	0.903899	0.945369	1.01112	0.505074	0.843463	0.474384	1.42835	0.485817	0.909004	0.943835	0.521364	0.369715	0.429708	1.14168	0.566927	0.578022	0.916718	1.97255	0.384537	1.27604	1.04081	1.25092	0.597486
111	chr1	59806591	60380718	0.546702	0.691935	0.583662	1.17618	0.457008	0.951579	0.295345	0.700622	0.858201	0.443355	0.536955	0.603572	1.0645	0.616851	0.858675	0.606836	0.937021	0.391865	1.04719	0.851225	0.6304	0.710314	0.573864	0.970273	0.864429	0.918531	0.550306	0.870139	0.564515	1.55989	0.694455	1.10165	1.20765	0.51877	0.508069	0.49708	1.09706	0.551469	0.646429	0.824468	1.64982	0.438958	0.954206	0.81473	0.773484	0.429597
112	chr1	60380719	60939726	0.466834	0.571375	0.427199	0.941928	0.303147	0.871912	0.350571	0.481083	0.82893	0.546984	0.725799	0.61079	0.998756	0.492471	0.708502	0.553818	0.42742	0.539866	1.09691	0.54006	0.507877	0.939183	0.734641	0.911253	1.06361	1.41327	0.466116	1.16892	0.613588	1.28068	0.655458	1.24785	0.855635	0.631174	0.473145	0.564653	1.40368	0.732242	0.718709	1.12602	0.918756	0.229542	1.04585	0.389234	0.971842	0.672335
113	chr1	60939727	61522369	0.479497	0.814749	0.331205	1.1121	0.557569	1.03702	0.354076	0.543084	1.0355	0.491032	0.823831	0.600881	1.25972	0.454669	0.716994	0.639434	0.304001	0.499588	1.14989	1.21637	0.567494	1.08315	1.12658	0.654521	0.742017	0.886271	0.617857	1.16584	0.638125	1.33525	0.602306	1.49019	1.35083	0.468556	0.442685	0.43079	1.09695	0.626058	0.770448	0.967782	0.555642	0.279128	1.12546	1.12721	1.11833	0.672457
114	chr1	61522370	62069927	0.447485	0.460632	0.38429	1.20874	0.468196	1.2444	0.338552	0.338282	0.860825	0.537391	0.496162	0.65479	1.03214	0.712034	0.596586	0.544028	0.489331	0.360584	0.992893	0.973081	0.568941	0.969006	0.572708	0.856505	1.03153	0.7514	0.466624	0.986664	0.481307	1.10098	0.707353	1.28149	1.24265	0.548774	0.387185	0.559792	0.937247	0.570937	0.753845	0.91972	1.43204	0.289924	0.825184	1.09668	1.29088	0.366291
115	chr1	62069928	62645996	0.502134	0.608903	0.370802	1.13208	0.587599	0.984756	0.25714	0.487602	0.916312	0.51813	0.570801	0.598322	1.17206	0.513636	0.664301	0.617946	0.713849	0.410466	1.18726	0.96981	0.53396	0.610534	1.11105	0.967005	0.746572	0.760748	0.472661	0.819589	0.557941	1.43169	0.81163	1.25601	1.25633	0.621685	0.466316	0.578528	1.63817	0.470918	0.552519	0.891389	1.11375	0.335561	1.16402	1.22755	1.03718	0.598522
116	chr1	62645997	63216789	0.463502	0.694313	0.480251	1.32498	0.388572	0.896134	0.261502	0.425189	0.699011	0.440161	0.560111	0.521742	0.86864	0.559565	0.646527	0.605737	0.81011	0.656757	1.20211	1.63831	0.39976	0.773714	0.559292	0.835276	1.19601	0.854967	0.471781	0.778342	0.52255	1.23907	0.632652	1.12669	0.900665	0.54094	0.524608	0.69779	0.954763	0.519195	0.548241	0.943395	1.46491	0.287243	1.20915	1.01188	0.868864	0.442204
117	chr1	63216790	63778331	0.577409	0.71819	0.419827	1.18792	0.569777	0.569175	0.332488	0.654778	0.881769	0.519422	0.522502	0.385738	0.886371	0.362889	0.572978	0.601688	0.538206	0.506321	0.851738	0.971744	0.515746	0.786741	0.813119	0.775365	1.03237	1.25789	0.494097	0.68981	0.512785	1.19174	0.637715	1.60847	0.973121	0.510422	0.574859	0.401479	1.12548	0.568601	0.856915	1.05812	0.949123	0.54643	1.37868	0.812867	1.0459	0.621113
118	chr1	63778332	64357321	0.375826	0.523782	0.443839	1.16551	0.471079	0.874592	0.524909	0.527798	0.619184	0.571851	0.674403	0.735802	0.786439	0.382717	0.7544	0.618975	0.638119	0.438477	0.8961	1.116	0.450559	1.13251	0.656156	0.91317	0.983001	1.06272	0.506474	1.07183	0.517743	1.32536	0.81329	1.20494	1.01448	0.401585	0.628546	0.484903	1.21345	0.753933	0.656426	0.923461	0.993182	0.490313	1.06839	0.713626	1.22126	0.589607
119	chr1	64357322	64893475	0.63181	0.468727	0.52519	1.38753	0.499539	0.661122	0.514694	0.663404	0.896695	0.535631	0.554899	0.664046	1.1439	0.537966	0.780494	0.550527	0.39273	0.456173	1.02534	1.18017	0.557935	0.851358	0.613511	0.834839	1.34832	1.24095	0.432776	1.23771	0.440212	1.14883	0.583359	1.19424	1.27593	0.510505	0.431666	0.49738	1.38096	0.703839	0.660282	0.908866	1.30593	0.631068	1.06115	0.722959	0.942766	0.754371
120	chr1	64893476	65443747	0.42473	0.620312	0.512382	0.760989	0.380091	0.701755	0.452865	0.564824	0.658089	0.635102	0.438477	0.640663	1.19932	0.641438	0.604395	0.594199	0.388895	0.310945	1.05357	1.01112	0.614653	1.07613	0.307945	0.743204	0.931716	1.29259	0.272855	0.823259	0.429974	0.999085	0.582023	1.28915	0.972524	0.457306	0.44868	0.446479	0.824047	0.600533	0.911919	0.746137	1.5342	0.756759	1.26272	1.05484	0.898055	0.509418
121	chr1	65443748	66034896	0.574573	0.591644	0.408254	1.53836	0.622579	0.825813	0.52793	0.693423	0.919857	0.675322	0.682598	0.599446	0.648112	0.606962	0.567948	0.605416	0.745636	0.44137	1.03939	1.3374	0.574749	1.08529	0.445018	0.736035	0.834813	0.968118	0.620192	1.13509	0.436369	1.28898	0.757707	1.12545	1.46538	0.473857	0.376452	0.626732	1.20479	0.645456	0.545055	1.0137	1.70632	0.588158	1.10525	1.07613	0.737054	0.422786
122	chr1	66034897	66634161	0.434242	0.563662	0.483661	1.13843	0.403495	0.814889	0.61396	0.683298	0.878124	0.675316	0.637467	0.681757	1.28969	0.51403	0.788716	0.450717	0.770771	0.400566	1.00936	1.61924	0.50227	0.928115	0.649457	0.761908	0.544741	1.1603	0.579089	1.17711	0.530401	1.39882	0.506327	1.21112	0.737282	0.482175	0.487767	0.440969	0.859089	0.489296	0.46005	1.23823	0.592172	0.513425	0.773816	1.00269	1.01831	0.482472
123	chr1	66634162	67152832	0.578767	0.725215	0.414488	1.14544	0.311864	0.96471	0.549687	0.663934	0.865017	0.686357	0.47743	0.722712	0.92453	0.654045	0.545726	0.484944	0.69511	0.408057	1.1122	0.848486	0.47556	0.991569	0.817406	0.840148	1.23992	0.993894	0.587564	1.07197	0.615093	1.52837	0.531296	1.08732	1.16137	0.520863	0.371807	0.496203	1.03405	0.479563	0.990223	0.804572	1.16729	0.650463	1.39001	0.8538	1.00415	0.42389
124	chr1	67152833	67732351	0.550141	0.572052	0.492698	1.05349	0.602911	1.03092	0.487935	0.465038	0.779377	0.677893	0.752542	0.585605	0.953285	0.677655	0.6591	0.564976	0.522447	0.335625	0.991508	1.1234	0.550389	1.01916	0.781033	0.561369	1.29483	1.08151	0.373039	1.18049	0.560091	1.39227	0.521525	1.20568	1.29788	0.509053	0.450846	0.394348	1.16863	0.555204	0.648183	0.72637	0.747364	0.668304	0.955211	0.742664	1.13763	0.681578
125	chr1	67732352	68276604	0.557021	0.656513	0.408022	1.30768	0.404885	0.940376	0.385548	0.580107	0.64096	0.595045	0.591626	0.801607	0.639245	0.748832	0.606555	0.57052	0.65552	0.65672	0.96491	1.04879	0.526889	1.0759	0.720708	0.828743	0.910084	1.23035	0.441445	1.48541	0.515016	1.32216	0.524099	0.972242	1.07267	0.499541	0.57076	0.361377	1.40864	0.719432	0.642168	0.824992	0.269543	0.652452	0.72197	0.724582	1.05313	0.36015
126	chr1	68276605	68817623	0.453799	0.67892	0.406399	1.0544	0.635179	0.83573	0.453209	0.543423	0.836289	0.51635	0.538706	0.399884	0.955402	0.702544	0.533042	0.610688	0.48459	0.503556	0.932734	0.958594	0.580598	0.797327	0.691068	0.94484	0.857083	0.94275	0.462356	0.945385	0.524974	1.27754	0.734636	1.17506	1.22016	0.462806	0.493248	0.514833	0.786625	0.647853	0.67964	1.10182	0.745234	0.427141	1.13508	1.14783	1.41613	0.722783
127	chr1	68817624	69418625	0.47954	0.623441	0.557634	0.906946	0.537355	0.890941	0.316323	0.569429	1.1485	0.537132	0.635302	0.408319	0.688327	0.772537	0.819982	0.656755	0.762424	0.657395	1.09395	1.10098	0.584026	1.11188	0.778235	0.612883	0.975723	1.08616	0.576541	0.929252	0.490643	1.13529	0.730488	1.17145	0.971744	0.560678	0.436204	0.543857	1.02272	0.542227	0.73812	0.870506	0.599537	0.541577	1.03147	0.897553	1.03631	0.654245
128	chr1	69418626	70050103	0.529693	0.552835	0.536787	0.974215	0.469303	0.726901	0.290727	0.441063	1.02808	0.648968	0.531297	0.378484	0.750101	0.608297	0.83933	0.584824	0.778647	0.690491	0.927928	1.20315	0.620175	0.668178	0.818141	0.951945	0.848924	0.968427	0.342727	1.13361	0.581106	1.35398	0.597714	1.26591	1.13278	0.482104	0.496507	0.556045	0.826252	0.655462	0.765792	0.927173	1.05718	0.442902	1.45622	1.06415	1.10388	0.762885
129	chr1	70050104	70656974	0.318349	0.664123	0.487534	0.592753	0.395496	0.644912	0.237615	0.324826	1.00272	0.684929	0.484209	0.43931	0.848102	0.409748	0.707552	0.507139	0.719707	0.431868	1.28657	0.863295	0.541197	0.886143	0.836065	0.90123	0.866871	1.31048	0.445234	1.15691	0.557434	1.13385	0.505216	1.30641	1.21097	0.49621	0.463876	0.408184	1.05453	0.54969	0.470593	0.863043	0.632458	0.527283	0.863348	1.1926	0.877646	0.569683
130	chr1	70656975	71257566	0.471505	0.475158	0.409449	0.934759	0.423733	0.888424	0.240548	0.782375	0.930036	0.612348	0.50824	0.743673	1.29201	0.617974	0.759471	0.566754	0.612276	0.490019	1.26172	1.11047	0.502499	1.28014	0.727543	0.88596	1.23206	1.22583	0.441384	0.916895	0.471521	1.19418	0.697962	1.5779	0.792697	0.566592	0.433049	0.443217	1.20886	0.690248	0.814746	0.999726	1.14446	0.432983	1.24852	1.04865	0.866031	0.810999
131	chr1	71257567	71845356	0.431511	0.38886	0.389439	1.36808	0.517781	0.664065	0.298272	0.884466	1.16309	0.672726	0.520724	0.698519	1.31368	0.419842	0.839509	0.584282	0.643666	0.463372	0.974824	0.946532	0.494567	0.992365	0.964465	0.726639	0.955528	1.21021	0.720656	0.785341	0.469468	1.06863	0.547543	1.14783	1.00958	0.541946	0.570442	0.440874	1.38204	0.540964	0.775565	1.21428	0.43373	0.505534	1.12658	0.898658	1.31543	0.732462
132	chr1	71845357	72472429	0.457411	0.479903	0.393659	0.933947	0.735494	0.667479	0.426735	0.549641	1.15023	0.606057	0.412434	0.529845	1.11669	0.563662	0.998832	0.583009	0.79269	0.548563	1.12116	1.12267	0.649627	1.3323	1.29894	0.629311	1.57217	1.03748	0.738511	1.19945	0.579656	1.34993	0.579799	0.997344	1.32083	0.560725	0.498809	0.377772	0.932276	0.533459	0.703702	0.964043	0.768091	0.456265	0.897693	0.554365	1.42229	0.608599
133	chr1	72472430	73144554	0.526837	0.578726	0.449198	1.08064	0.500446	0.868404	0.518842	0.684144	1.4269	0.703715	0.602574	0.422316	1.13108	0.407745	1.21172	0.60823	0.841193	0.51437	1.01786	1.14937	0.520868	0.898856	0.979967	0.766737	1.32615	1.20095	0.722388	0.878765	0.580343	1.24968	0.559194	1.08388	1.05812	0.530835	0.625307	0.642681	1.25125	0.572819	0.822975	1.17626	0.762093	0.542543	1.14448	1.16741	1.06412	0.670907
134	chr1	73144555	73774849	0.4334	0.524272	0.305056	0.977771	0.56232	0.575862	0.575005	0.533469	1.32389	0.623997	0.58111	0.497094	1.04728	0.54372	1.08366	0.658521	0.932374	0.389582	0.625297	1.02091	0.569259	0.669135	0.614513	0.640245	1.06747	0.913534	0.46958	0.415232	0.527462	1.25692	0.479985	1.37763	0.831394	0.605573	0.546234	0.436334	0.951498	0.44021	0.675669	1.09689	0.599673	0.449558	1.26944	1.34771	1.02118	0.777839
135	chr1	73774850	74407237	0.516468	0.537748	0.401165	0.836538	0.606911	0.535215	0.568606	0.553281	1.16359	0.625699	0.520084	0.337136	0.879402	0.488197	1.07637	0.571346	0.864127	0.563073	0.845808	1.10756	0.566435	0.916334	0.502257	0.701047	1.04904	1.11254	0.660684	0.575814	0.48867	1.45737	0.451493	1.22116	0.983107	0.549018	0.484826	0.490372	1.48064	0.422349	0.69541	1.22905	0.598855	0.46489	1.18515	1.03202	1.20101	0.550424
136	chr1	74407238	75045278	0.463463	0.648858	0.477809	0.966679	0.617604	0.874526	0.503728	0.599885	1.22551	0.610877	0.622286	0.699452	1.13061	0.435704	1.07169	0.582207	0.627813	0.561183	1.45732	0.889587	0.554523	0.969179	0.758566	0.685818	0.935969	1.0795	0.561485	0.906368	0.433797	1.42547	0.52559	1.21801	1.0138	0.561203	0.730276	0.460248	1.31106	0.586444	0.6051	1.1249	0.939164	0.485768	0.899514	1.46223	1.26004	0.993572
137	chr1	75045279	75662881	0.556027	0.531645	0.543336	1.40045	0.714909	0.643426	0.536498	0.433038	1.06542	0.73128	0.497685	0.51759	0.797227	0.475369	1.22003	0.629715	0.601203	0.463111	0.958061	1.17095	0.460765	1.53689	1.15712	0.620824	0.819566	0.933892	0.424101	0.941968	0.651661	1.36746	0.495231	1.11203	0.930512	0.56501	0.574895	0.367204	1.00474	0.630852	0.69276	0.891954	1.03137	0.396276	1.27083	1.1036	1.21538	0.691345
138	chr1	75662882	76288206	0.550813	0.711116	0.505871	1.38319	0.657649	0.587014	0.658157	0.384365	0.984185	0.716165	0.603418	0.647184	0.775376	0.538051	0.923883	0.592	0.732937	0.651551	1.19258	1.37966	0.55039	1.3083	1.06844	0.689227	1.40169	0.744388	0.573336	1.05635	0.488843	1.22243	0.640377	1.22897	0.932801	0.588652	0.538164	0.425586	1.61892	0.587012	0.954846	1.05369	1.02108	0.589753	1.28825	0.592201	0.739931	0.542789
139	chr1	76288207	76875077	0.465906	0.461435	0.550158	1.06931	0.566179	0.642297	0.67178	0.881263	1.03469	0.574854	0.559868	0.651133	0.315911	0.531839	1.0007	0.517751	0.672906	0.477355	0.927997	0.854614	0.526057	1.14611	0.940423	0.780539	1.08153	0.745405	0.561546	0.85721	0.544268	1.26046	0.666932	1.21269	0.926118	0.576358	0.571459	0.43021	1.70103	0.786294	0.664959	0.761503	0.528948	0.440722	0.923596	1.32677	0.871976	0.577516
140	chr1	76875078	77433567	0.520441	0.668705	0.565597	1.19223	0.491393	0.606685	0.487906	0.33393	1.33333	0.516983	0.602428	0.550928	0.712425	0.422042	1.21335	0.583291	0.730323	0.472319	1.07838	1.16381	0.504429	1.16048	0.831415	0.843688	1.11114	0.969426	0.54793	1.08157	0.511985	1.4766	0.55771	1.05845	0.814077	0.52022	0.532129	0.493062	1.02321	0.785947	0.516799	1.18995	1.28332	0.467361	1.2465	0.899033	1.09192	0.736636
141	chr1	77433568	78014083	0.41648	0.634091	0.424741	1.01045	0.612321	0.642587	0.500796	0.610934	1.17011	0.477777	0.532363	0.585707	0.950712	0.383121	1.12863	0.562518	0.52023	0.601836	0.963141	0.959061	0.544176	0.89192	0.622128	0.816701	1.29784	0.828234	0.400935	0.839687	0.4579	1.30601	0.795203	1.10538	1.06505	0.509501	0.658256	0.296176	1.36647	0.608915	0.668125	1.01046	1.17867	0.391697	1.22927	1.10381	1.37384	0.660239
142	chr1	78014084	78608752	0.451016	0.695377	0.577855	0.856739	0.577351	0.62085	0.616916	0.812253	0.848066	0.533389	0.436121	0.556859	0.963719	0.455738	1.37144	0.570333	0.629808	0.551594	0.744907	1.07182	0.498023	1.15764	0.962696	0.716074	1.18043	1.29209	0.520261	0.748358	0.495827	1.57939	0.540127	0.839906	0.777381	0.512535	0.533635	0.314407	1.65048	0.650838	0.490192	0.883592	0.560098	0.479645	0.86794	0.838621	0.920323	0.694086
143	chr1	78608753	79191996	0.452534	0.634331	0.505748	1.10695	0.488492	1.09102	0.513145	0.630188	1.32563	0.541265	0.453405	0.428524	0.689771	0.550887	1.40046	0.48996	0.672899	0.338142	1.25119	1.01477	0.504829	1.59451	1.0518	0.563234	1.22974	1.10035	0.62034	0.954504	0.492966	1.16253	0.635075	1.2642	0.683279	0.448214	0.539811	0.531044	1.27067	0.624829	0.502284	1.04009	1.12179	0.674218	0.824989	0.956915	0.929409	0.696755
144	chr1	79191997	79812996	0.527975	0.508391	0.380095	1.32387	0.591855	0.566345	0.595892	0.624138	1.07754	0.545109	0.606159	0.520195	0.856754	0.431334	0.796235	0.454652	0.745036	0.39739	0.74129	1.10019	0.543694	1.4552	0.934258	0.607134	1.24917	0.834911	0.464434	0.992545	0.551214	0.947695	0.535824	1.2114	0.885011	0.421958	0.375572	0.376189	0.6698	0.558035	0.613449	0.847203	0.540819	0.518697	0.85108	0.877506	1.00483	0.838201
145	chr1	79812997	80447542	0.638146	0.664065	0.576395	1.32048	0.708808	0.831927	0.523554	0.681702	1.15541	0.556336	0.636946	0.647929	1.15091	0.591548	0.956228	0.556161	0.61984	0.510094	0.865518	1.00951	0.490172	1.37449	1.07957	0.554794	1.05835	0.753728	0.692428	1.13081	0.635677	1.52441	0.537399	1.4141	0.964794	0.479078	0.557359	0.56262	0.772338	0.486385	0.588973	0.990318	0.369907	0.70244	1.14511	0.952002	1.22608	1.07918
146	chr1	80447543	81097252	0.464427	0.47817	0.393826	0.904017	0.521419	0.941198	0.610103	0.57129	1.39411	0.54758	0.49185	0.672046	0.965603	0.593047	1.10437	0.591145	0.573249	0.481722	1.12872	0.870007	0.443043	1.17913	1.11971	0.745606	0.867456	0.690076	0.531213	1.20902	0.656605	1.06205	0.553386	1.04608	0.83063	0.517479	0.550715	0.535639	1.1809	0.515439	0.566371	1.03912	0.628622	0.623956	1.10852	1.09105	1.18149	0.694067
147	chr1	81097253	81720993	0.535137	0.564574	0.438542	0.829237	0.476183	0.944405	0.58029	0.53217	1.22062	0.679637	0.412228	0.51771	0.930845	0.720137	1.31024	0.542041	0.615679	0.460363	0.99516	1.01847	0.507725	1.09973	0.699485	0.727688	1.14062	0.649533	0.454197	0.832435	0.613444	1.26306	0.540177	1.20991	0.883975	0.551979	0.450715	0.517722	1.1022	0.55757	0.584197	1.09908	0.446511	0.676222	0.814039	0.805392	0.992648	0.879417
148	chr1	81720994	82290104	0.598316	0.517352	0.518237	1.13011	0.466486	0.704114	0.471061	0.730741	0.860101	0.652914	0.533085	0.637775	1.27107	0.478548	0.879401	0.587228	0.732386	0.685761	1.1303	1.1871	0.442112	1.0753	0.976019	0.6588	0.930442	0.897149	0.659999	1.17793	0.380507	1.39935	0.629344	0.991076	0.821375	0.510039	0.562428	0.53035	0.923106	0.659172	0.623569	0.922008	1.13595	0.587431	0.870836	0.813736	1.15313	0.458345
149	chr1	82290105	82880592	0.64794	0.601287	0.598668	1.24972	0.6691	1.08599	0.53718	0.676959	1.16807	0.661938	0.498981	0.67831	1.0122	0.602936	1.15892	0.586844	0.538744	0.456678	1.06126	0.8318	0.510263	0.973519	0.732761	0.836681	0.854283	0.762055	0.531911	0.975227	0.60071	1.61032	0.714395	1.45279	1.1449	0.565883	0.518896	0.519007	0.66398	0.565761	0.499901	1.07601	0.698221	0.60074	1.19278	1.05076	0.952701	0.728278
150	chr1	82880593	83494495	0.57042	0.716193	0.56678	1.24444	0.63693	0.880773	0.53117	0.623961	1.28101	0.554634	0.407636	0.718532	1.44281	0.731345	1.10459	0.523372	0.512509	0.456848	1.17828	0.720457	0.442027	1.17249	0.813485	0.714877	1.36658	1.06401	0.738476	0.901623	0.714596	1.40403	0.652232	1.32025	1.21816	0.593212	0.838022	0.504359	0.917097	0.319364	0.487488	0.751178	0.41276	0.4418	1.11156	0.99367	0.713808	1.16574
151	chr1	83494496	84076510	0.52878	0.647871	0.382279	0.933907	0.644377	0.934209	0.627917	0.760227	1.38382	0.601967	0.637635	0.756499	1.06882	0.476163	0.864041	0.641787	0.483406	0.630941	0.987811	1.04644	0.618521	1.24723	1.05011	0.681952	0.892679	1.39565	0.488395	1.30899	0.682752	1.6876	0.646395	1.08191	1.13147	0.547599	0.618853	0.431442	1.157	0.488404	0.554594	0.999843	0.595456	0.702755	1.31941	0.888606	1.20667	0.701832
152	chr1	84076511	84674563	0.60406	0.638227	0.518592	1.06709	0.642952	0.94198	0.674868	0.55306	1.32607	0.578238	0.776435	0.708989	1.05676	0.462263	0.936576	0.573037	0.615816	0.531871	1.13974	1.25566	0.360375	1.52987	0.923189	0.717199	0.632955	1.21585	0.555256	0.878127	0.702177	1.52623	0.597632	1.42284	0.962783	0.498652	0.498487	0.336364	1.40301	0.602869	0.784573	1.08749	0.593628	0.625372	1.13745	1.22623	1.11026	0.85143
153	chr1	84674564	85228907	0.398982	0.633889	0.442542	1.2598	0.572805	0.790311	0.501156	0.699037	1.46723	0.627348	0.548848	0.700842	1.02889	0.324075	0.825766	0.554235	0.389753	0.425964	0.857841	0.909597	0.434932	1.17573	0.52121	0.711266	1.17968	0.510545	0.403596	1.07017	0.451368	1.23786	0.534089	1.16624	1.22889	0.545467	0.546394	0.323171	0.945852	0.670526	0.671465	1.01149	0.458357	0.461847	0.893391	0.731421	1.05352	0.876179
154	chr1	85228908	85760592	0.412444	0.31504	0.482498	1.06601	0.407475	1.08913	0.430246	0.459752	1.60377	0.535296	0.729116	0.601009	0.94813	0.454673	0.785983	0.462094	0.602541	0.487235	0.907246	0.922925	0.513221	0.888017	0.77949	0.589398	1.05779	0.936018	0.510619	0.919926	0.455086	1.33443	0.585096	1.39828	0.639817	0.488554	0.536885	0.477383	1.25597	0.515222	0.384387	0.818515	0.833874	0.620486	0.877276	0.620276	0.825956	0.656909
155	chr1	85760593	86335646	0.500168	0.519146	0.357661	0.895651	0.427298	0.781425	0.299286	0.558584	1.32831	0.494868	0.668077	0.704257	0.99243	0.480781	0.799946	0.533749	0.678312	0.328745	0.867622	1.21568	0.469414	0.951209	0.889953	0.861731	1.25789	0.728863	0.627272	0.890512	0.497002	1.28888	0.677481	1.15218	1.05861	0.591042	0.480074	0.495778	0.621187	0.565123	0.784484	0.72837	1.02193	0.653904	0.893139	0.772719	0.935684	0.670252
156	chr1	86335647	86956300	0.536814	0.744859	0.454177	0.733332	0.523214	1.03512	0.458908	0.531679	1.44908	0.424722	0.642865	0.633386	0.828382	0.533361	0.746854	0.609625	0.594932	0.538806	1.06111	1.18837	0.459187	1.08379	0.997658	0.781735	0.820681	0.865423	0.436483	0.780571	0.529123	1.5266	0.624313	1.16935	0.83322	0.580274	0.510627	0.356131	1.00716	0.527096	0.474395	1.03005	1.13074	0.675451	1.137	1.33663	0.677747	0.769869
157	chr1	86956301	87555322	0.354487	0.714275	0.495025	1.37284	0.499671	0.845253	0.341245	0.521943	1.10899	0.467136	0.546951	0.614591	0.948581	0.42747	0.855894	0.48847	0.315905	0.438026	0.692257	1.05521	0.367111	1.14256	0.733551	0.520991	1.22512	0.773208	0.46921	0.872431	0.544845	1.57947	0.536235	1.02361	0.891142	0.56504	0.450846	0.306539	1.06649	0.441296	0.337587	0.935386	1.04501	0.670517	1.2541	0.748607	0.91633	0.706806
158	chr1	87555323	88076806	0.308307	0.841892	0.412502	0.914446	0.648788	0.532369	0.228526	0.743238	1.35775	0.427983	0.409202	0.549598	1.08434	0.359888	0.503622	0.563418	0.269835	0.478164	0.899798	0.997729	0.449419	0.964514	0.635896	0.752924	1.10594	1.02886	0.613939	1.01709	0.506686	1.53437	0.519104	1.17432	0.873014	0.485085	0.642748	0.528479	0.83412	0.625002	0.536701	0.8712	1.60528	0.509166	1.02622	1.12238	1.18693	1.03661
159	chr1	88076807	88632427	0.560025	0.524269	0.435497	0.863714	0.569381	0.89672	0.243927	0.545965	1.02634	0.545967	0.577843	0.710199	0.841943	0.752899	0.704929	0.548663	0.463488	0.301164	1.05217	1.41709	0.445092	1.07156	0.616653	0.737825	1.22248	0.709776	0.59953	1.09899	0.580923	1.48796	0.629577	1.2616	0.998151	0.536204	0.593793	0.364821	1.42823	0.462566	0.465955	0.916593	1.94748	0.563064	0.704872	1.00994	1.2582	0.842074
160	chr1	88632428	89234116	0.584907	0.730974	0.444759	0.622914	0.597563	0.91661	0.339979	0.57016	0.959025	0.561076	0.742948	0.612704	1.18845	0.371153	0.796385	0.53979	0.578311	0.454895	0.955238	0.912222	0.469867	1.5679	0.765138	0.965103	1.21306	0.959227	0.599696	1.08634	0.550854	1.59021	0.565619	1.28747	1.12573	0.591284	0.600834	0.390787	1.38441	0.563585	0.536415	1.21501	0.723931	0.476385	1.10566	1.01499	1.09112	0.732132
161	chr1	89234117	89835964	0.831843	1.09434	1.04603	0.835264	0.884575	1.04217	0.604936	0.701952	1.09027	0.773906	0.862124	0.830873	0.804766	0.843661	0.742469	0.89654	0.676362	0.954861	0.837826	0.874986	0.761597	1.11398	0.978835	1.11331	0.985529	1.12225	0.925272	0.910295	0.840392	2.09509	1.16265	1.17144	0.92235	1.00798	0.752486	0.893954	0.953931	1.04526	1.14204	1.08391	0.708155	1.00861	1.00927	0.97244	1.12494	1.61439
162	chr1	89835965	90417012	1.12415	1.04423	1.62524	1.17333	1.01797	1.49557	0.741864	0.977739	1.01017	0.921382	1.08804	0.977985	1.04332	0.806154	0.641451	0.873637	0.597253	0.945432	1.07412	0.866204	0.83209	1.24463	0.844461	1.12056	1.12286	1.33215	1.08939	0.835499	1.03062	1.85456	1.33239	1.41556	0.89151	1.20394	0.943753	0.849245	0.633303	0.782089	1.11578	0.835687	1.02452	1.21484	0.901152	1.08981	1.0931	1.14121
163	chr1	90417013	90984240	0.909127	0.924764	1.2576	1.15468	1.35997	1.44571	0.716581	1.0892	0.93341	0.977312	1.62814	0.867654	1.05275	0.923894	0.771045	1.00473	0.757288	1.16398	1.35568	0.971676	0.972146	1.21124	1.12454	1.4864	1.20339	1.31409	1.11071	1.05904	0.961711	2.0757	1.09798	1.21	0.786415	1.10761	1.04796	0.862532	1.2252	1.18243	1.64139	1.0808	0.833527	1.09291	0.994826	1.01913	0.882567	1.49504
164	chr1	90984241	91590270	0.901404	0.901632	1.31011	0.953476	0.996475	0.978767	0.967731	0.79345	1.20559	1.02421	1.15005	1.1522	0.481413	0.982387	0.629285	1.01012	0.938208	0.825394	0.940542	0.941964	0.926853	1.01927	1.16809	1.19557	0.965475	1.24393	1.16259	0.940077	1.29866	1.66653	1.3404	1.06719	1.14649	1.14367	1.1994	0.992707	1.23761	1.21585	1.36156	0.90472	0.869846	1.23104	0.617483	0.709342	0.995507	1.12134
165	chr1	91590271	92184429	1.09872	0.807387	0.955168	1.00392	0.890945	1.21747	0.821649	1.01255	0.991776	0.820097	1.03667	1.15786	0.591117	0.819177	0.695216	1.0817	0.995536	0.868817	0.866031	0.858213	1.10682	1.25469	1.16785	1.36843	0.978645	1.15028	1.04763	0.974011	1.08418	1.44245	1.25935	1.25143	0.686321	0.945459	1.22596	0.996967	0.874645	1.15548	1.49815	0.852675	0.468561	1.32005	1.16672	0.777019	0.985348	1.52958
166	chr1	92184430	92781375	1.0998	1.0782	0.781104	0.689708	1.02407	1.31155	0.927175	1.18754	0.851334	0.758341	1.01804	1.23629	0.449158	0.63898	0.536161	0.944816	1.02889	1.00209	0.808582	0.922916	0.921842	1.11	1.33071	1.27188	1.05766	1.42856	1.10173	1.2265	1.21694	1.5866	1.46903	1.01691	0.846193	1.00482	1.11849	1.02299	1.07188	1.15294	1.02509	0.960878	0.403457	1.256	1.36448	1.08548	0.899238	1.33299
167	chr1	92781376	93411980	0.910323	0.997398	0.836447	1.03772	1.01441	0.876931	0.871556	1.11094	1.48626	0.806407	1.24306	0.876065	0.612841	0.972692	0.924799	1.10584	1.11204	0.800963	1.41263	1.11845	0.952733	0.837659	1.00277	1.17761	1.07965	1.17677	1.05421	0.651755	0.972959	2.02041	1.64187	1.13985	1.21715	1.11428	1.106	0.861219	0.878656	1.24439	1.3394	1.15175	0.441794	1.5166	1.11767	0.846021	1.13439	0.88296
168	chr1	93411981	94022121	0.948423	1.36789	0.895923	1.20171	1.0744	0.895183	1.12375	0.954846	1.09384	0.952249	0.955393	1.36316	0.920105	0.93899	0.818667	0.974167	1.42415	0.956289	1.16144	0.904937	1.21982	0.961866	0.661683	1.06349	0.880301	1.25892	1.06899	0.943306	1.02146	1.83164	1.39322	1.22104	1.28519	0.963988	1.03061	0.945624	0.669549	1.17103	1.19222	1.02665	0.228672	1.11146	1.13395	0.873745	0.803684	1.423
169	chr1	94022122	94532104	0.936681	0.980562	1.09352	0.937124	0.927148	1.13185	0.904564	0.867728	1.08306	0.785589	1.11231	0.860066	1.20526	0.867997	0.601785	1.04734	0.995266	0.826636	0.950626	1.05702	0.874054	1.08895	1.33142	1.31699	1.12967	1.05292	0.959768	1.16554	0.860467	1.60447	1.20228	0.974882	1.07685	0.898345	1.09371	0.78504	0.874602	0.903103	1.28919	0.796289	0.172734	1.23519	1.34507	1.26523	1.00013	1.08614
170	chr1	94532105	95085962	0.918379	1.12785	0.88452	0.971916	1.02784	1.27265	0.930021	0.875843	1.31578	0.820834	1.1079	1.12792	1.08488	1.06067	0.842934	1.03159	1.52806	0.795826	0.715399	0.836752	0.97176	1.13165	1.17344	1.44006	1.07433	0.894526	1.09073	0.823026	1.04201	1.4197	1.1254	1.03402	1.07587	1.09364	0.863606	1.21345	1.17101	0.837553	1.37888	1.01268	0.719295	1.3677	0.940227	1.17892	0.803863	1.35113
171	chr1	95085963	95614269	1.25377	1.10597	0.871222	0.956659	0.971744	1.14353	0.896859	1.12314	1.10218	1.06848	1.12461	1.28002	1.03797	1.0184	0.670463	0.951372	1.27684	0.863493	1.39641	0.971915	0.864564	1.05985	1.35811	1.33984	1.07648	0.76421	1.02054	1.01961	1.08418	1.53739	1.05829	1.28614	1.09745	0.96274	1.20743	0.804931	1.68928	1.20417	0.806857	1.00275	0.508057	1.30871	1.0173	0.849109	1.20624	1.29849
172	chr1	95614270	96185750	0.974085	1.26328	1.08985	1.24025	0.952272	1.36257	0.961585	0.976359	1.13817	1.06942	0.877739	1.10711	1.03334	1.11761	0.88703	0.948809	1.4693	0.792271	1.37828	1.2821	1.04235	1.01099	1.16628	1.35777	1.03049	0.979534	0.990886	0.915306	1.10156	1.55789	1.35762	1.1664	1.17069	1.07486	1.05354	0.998349	1.38057	1.04678	1.1998	1.00353	1.44345	0.928311	1.27904	1.78967	0.930178	1.20921
173	chr1	96185751	96773407	1.1017	1.17585	1.11892	1.08901	1.27061	1.51128	1.146	1.03796	0.857299	1.0984	0.99531	1.05177	0.857502	0.882901	0.909177	1.02225	1.30657	1.04708	1.11455	0.940979	1.13772	1.29307	1.47725	1.32064	0.99337	1.1674	1.05738	0.892411	1.08406	1.66582	1.22132	1.36049	1.04695	1.13109	0.886818	0.833694	1.64996	0.905326	1.2541	0.703618	1.24792	1.42389	1.07111	0.874036	1.19499	1.31588
174	chr1	96773408	97369806	0.776581	1.1687	0.7881	1.18844	0.916929	1.26254	1.04938	1.21984	1.43497	1.0624	1.12429	1.16981	0.750434	1.16792	0.789073	0.869081	1.72072	1.18745	0.895908	1.13631	0.943534	0.924754	1.69997	1.27054	1.19252	0.871439	0.903099	0.822887	1.0495	1.40077	0.985785	1.11032	0.892147	0.951631	1.17443	0.669532	1.45482	1.10227	1.16945	0.993992	0.895987	1.47431	0.656692	0.696625	1.33566	1.20571
175	chr1	97369807	97970896	1.0213	0.98199	0.767242	0.941403	1.21424	1.46509	1.2783	0.94595	0.780314	1.04911	0.929762	1.01494	0.760013	0.697284	0.625343	0.980213	1.43744	1.01928	1.12253	1.1541	1.05587	0.605327	1.21443	0.90376	1.04845	0.778229	0.790255	1.23572	1.06794	1.35911	1.1759	1.22378	1.04242	1.03987	0.783265	0.751144	1.15981	0.938493	1.51528	0.805969	0.92443	1.04535	0.985138	1.07919	1.0644	1.49388
176	chr1	97970897	98578727	1.09054	1.08289	0.953986	1.20741	1.06287	1.08647	1.10306	0.964278	0.937485	1.03673	0.644418	1.22229	1.17512	0.997015	0.819338	0.932594	1.58813	0.786732	1.08089	1.05202	1.02526	1.10979	1.00297	0.863851	0.883019	1.09618	0.873251	0.99425	1.01395	1.38618	0.944077	1.15087	0.786498	0.910672	0.891248	0.970328	0.85066	1.09797	1.25371	0.616969	0.81349	1.04741	0.932914	1.216	1.04213	1.35513
177	chr1	98578728	99172535	1.09217	1.40021	1.28926	0.811873	0.986083	1.94175	0.985052	1.07485	1.11942	0.943653	0.693937	1.0837	0.854726	0.870065	1.09796	0.819991	0.972805	0.834575	1.37255	1.18827	1.16368	1.05459	1.3243	0.90699	0.970477	0.678979	0.86378	0.718932	0.837935	1.60618	1.10296	1.13174	0.973403	1.08199	0.945449	0.874864	0.902281	1.04158	0.782744	0.931426	0.998176	0.970633	1.34639	1.2567	1.06325	1.32213
178	chr1	99172536	99790172	1.11768	1.55205	1.18405	0.911736	0.916609	1.79309	1.16388	1.24369	1.32702	1.13375	0.743792	1.14826	0.750609	1.16949	0.856961	1.03558	0.836101	0.94618	1.02896	1.23816	1.31937	0.822973	1.04858	0.983781	0.991404	1.17513	0.8038	0.756292	1.09098	1.71451	1.23208	1.37882	0.906499	0.921813	0.910952	0.843641	1.05754	0.977858	0.804312	0.839108	0.925893	0.787459	0.910194	0.974952	0.931536	1.62665
179	chr1	99790173	100382303	1.04539	1.13253	0.997854	1.31775	1.07513	1.7217	0.996279	0.986055	1.1685	0.975682	0.967652	1.32104	0.880479	0.994767	0.628956	1.00088	1.01658	0.909443	1.03416	0.954726	0.962568	0.695691	0.90081	0.864566	0.80487	0.792327	0.905758	0.817502	1.13213	1.49158	0.978608	1.1568	1.0296	1.05428	0.924012	1.1945	0.879156	1.45075	0.84401	0.969376	0.895221	1.30491	1.28882	1.01438	1.17648	1.29331
180	chr1	100382304	100970376	1.01392	1.07626	1.06005	1.05046	0.944295	1.88566	1.01181	0.540906	0.969242	0.945717	1.02843	0.926446	1.14474	0.553405	1.03831	0.82972	1.29668	0.872157	1.09369	1.07414	1.0909	0.977353	1.35722	0.968308	0.711831	0.916718	1.2048	0.875119	1.02094	1.40859	0.609028	1.08265	0.988602	0.969901	1.00147	0.906707	1.25575	1.49724	0.755386	0.880103	1.11297	0.924487	1.18431	0.994196	0.950132	1.3117
181	chr1	100970377	101575036	1.26974	0.907024	1.19979	1.17653	1.01155	1.54238	1.02428	0.595773	1.29376	0.878712	0.916621	1.02142	1.10057	0.665591	0.718795	0.879064	1.06729	1.05284	1.21144	1.2394	1.11865	0.781498	0.862642	0.693611	1.26221	0.744707	0.900345	0.853037	1.02076	1.39319	0.624116	1.07724	1.23624	0.833073	0.976869	0.998138	0.958687	1.32847	0.826606	0.958711	0.552122	0.958209	1.03	0.817238	0.567935	1.3179
182	chr1	101575037	102162511	0.806664	1.23674	1.3867	1.36906	1.15341	1.62493	1.20796	0.56719	1.60215	0.940363	0.871424	1.17209	1.02771	0.50123	0.747979	0.983519	0.963523	0.834112	0.955135	0.97474	1.19346	0.475792	1.45069	1.02272	1.0535	0.970406	0.965013	1.03533	0.881832	1.58422	0.590302	0.911778	0.78837	0.846431	1.0239	0.708903	1.03348	1.16666	0.76234	1.19121	0.902538	0.847066	1.06584	0.563897	0.730715	1.59774
183	chr1	102162512	102821319	1.03567	1.34029	1.52033	0.900176	0.920788	1.80841	1.3654	0.591289	1.17566	0.868308	0.96305	1.00268	0.814874	0.58034	1.06613	0.935682	1.34312	0.865598	1.01147	0.961996	1.07944	0.838859	1.08445	0.971709	1.1169	0.755224	0.784098	0.896272	0.815279	1.50718	0.297098	1.27092	1.05978	0.754115	0.939953	1.00336	0.787575	0.820594	0.64485	0.738974	1.04524	0.797172	1.08472	1.06988	0.972087	1.39938
184	chr1	102821320	103522641	1.11066	1.12651	1.18	0.79302	0.935748	1.95978	1.02485	0.519182	1.43395	1.01313	0.886186	0.780498	0.896368	0.543524	0.832018	0.892171	0.552812	0.974279	0.935651	0.940238	1.20703	0.933256	0.961091	0.800208	0.975111	0.761202	0.910964	0.896278	1.26043	1.34643	0.358415	1.20398	0.678758	0.889385	0.993608	0.993681	1.24461	1.07402	0.826455	1.041	0.919996	1.14918	0.89053	1.10666	0.975809	1.20992
185	chr1	103522642	104275074	1.20228	1.64911	1.8394	1.54359	1.64454	1.54641	1.70498	0.608165	1.28177	1.35203	1.34169	1.12122	1.18613	0.755815	1.00173	1.2667	1.73071	1.42413	1.29472	1.29167	1.27518	1.16952	1.40593	1.45849	1.28885	0.885837	1.15259	1.07934	1.36608	1.92854	0.706072	1.26305	1.00886	1.10242	1.47065	1.04732	1.46009	1.66021	1.01094	1.54743	1.47976	1.35075	0.965598	0.92259	1.18053	1.97146
186	chr1	104275075	104935505	1.03002	1.40261	1.11629	1.27853	1.04182	1.45895	1.04215	0.474806	1.19002	0.943477	1.03863	0.995665	0.928096	0.552136	1.04612	1.107	1.0947	1.09705	0.971814	0.881205	1.16203	1.05446	1.40181	1.24038	1.14817	1.16676	1.25323	1.15545	1.03402	1.74457	0.635508	1.26099	1.0984	1.00306	1.02513	1.03874	1.30478	1.35235	0.991533	1.16511	1.30724	0.896293	0.879115	0.763909	0.953523	1.45932
187	chr1	104935506	105624180	0.961438	1.05768	1.00246	1.0721	0.904936	1.90409	0.941002	0.786347	0.956666	0.850584	0.845041	1.04408	1.1895	0.599671	1.12657	1.07102	1.39906	1.00455	0.623925	1.19499	1.12004	1.23944	1.20731	0.896574	1.09	0.981675	1.06253	1.28534	1.13271	1.08823	0.532703	1.16446	1.28525	0.730824	1.09596	0.810146	1.33474	1.26481	1.01549	0.879747	1.59664	0.984558	1.22981	0.755019	1.00726	1.38268
188	chr1	105624181	106333559	0.907805	1.19505	0.871452	1.09699	1.05818	1.64114	1.24955	0.768445	0.980778	0.871253	1.02386	1.4194	1.06589	0.580768	1.27156	1.01763	1.53167	0.897055	1.04301	0.904518	1.20262	0.921894	1.70101	0.859373	0.807046	0.632791	0.940392	0.868055	1.24918	1.15674	0.678307	1.00127	1.16014	0.668294	0.928354	1.1459	0.8645	1.13442	0.940576	0.910935	1.16367	1.19506	1.23245	0.972397	1.12403	1.57347
189	chr1	106333560	107010452	1.01841	1.22422	1.18642	1.09905	0.995455	1.29844	1.11577	0.609236	0.978013	0.86765	1.05885	1.42557	0.653015	0.509124	1.05404	1.0131	0.966536	0.86319	1.11035	1.05167	1.15914	0.977871	1.3592	1.04756	1.22695	1.19353	0.900557	1.18377	1.26943	1.14463	0.707628	0.988028	1.38275	0.951633	0.951591	1.00957	1.62249	1.13264	0.95649	0.615134	1.41948	1.1212	0.881457	1.18829	1.05288	1.38461
190	chr1	107010453	107647138	0.913424	1.01858	1.25591	0.791642	1.1675	1.56263	1.03897	0.422373	1.24579	0.814779	0.877304	1.41056	1.14503	0.500634	0.892183	0.995708	1.29153	0.84291	0.86803	0.937242	1.1317	1.07184	1.32438	0.939431	1.52865	1.10515	1.07014	1.07846	1.03232	1.61752	0.551548	1.46719	1.262	0.953846	1.0729	0.93076	1.57942	1.09609	0.763919	1.13108	1.05553	1.34816	1.03751	1.22801	0.99678	1.64321
191	chr1	107647139	108209610	1.021	0.9189	1.59063	1.30773	1.08342	1.49874	1.23304	0.727461	1.10358	0.791584	1.27665	1.37061	1.12911	0.502177	0.805144	0.927303	1.09505	0.938775	0.910806	0.79545	1.15351	0.862617	1.12989	0.946099	0.961149	0.827787	0.905929	1.03855	1.25382	1.46618	0.560076	1.36094	1.17967	0.921508	1.04469	0.778174	1.36391	1.08881	0.526133	1.17616	1.05558	1.06012	1.34381	0.802503	0.879484	1.7224
192	chr1	108209611	108790410	0.699248	1.05454	1.50829	0.764108	1.08235	1.80287	1.24726	0.597006	1.14553	0.943515	1.08415	1.18705	0.801945	0.70445	0.612463	1.07757	1.00146	0.935635	0.878414	1.15351	1.17404	0.84967	1.37269	1.24583	0.869417	1.16448	1.04256	0.977637	1.00619	1.80553	0.639274	1.01329	1.26075	0.975833	0.844859	0.996959	1.0904	1.17744	0.702403	0.763618	1.09584	1.05407	0.919911	1.04207	0.837379	2.02598
193	chr1	108790411	109312955	0.924274	1.36979	1.44899	1.11177	0.970798	1.43116	1.17163	0.58048	1.46947	0.808162	1.099	1.08005	0.938519	0.538343	0.503772	0.975126	0.999829	1.04784	1.17117	1.32366	1.08721	1.21137	1.28069	0.903617	0.881452	1.32997	1.06139	1.01438	1.03677	1.79417	0.624944	1.30608	0.932794	0.858025	1.06575	0.975803	0.996306	1.04651	1.08107	1.09145	1.67951	1.30021	1.14885	0.75061	1.211	1.19994
194	chr1	109312956	109881076	0.811584	1.14364	1.46192	0.808628	0.769208	1.77459	0.948083	0.619602	1.47473	0.643104	0.720777	1.01522	0.914412	0.566091	0.574962	0.987541	0.868971	0.902223	1.21924	0.901898	1.04126	0.892934	0.866675	0.655672	1.06522	1.12909	1.11538	0.932673	1.02711	1.55923	0.353107	1.11	0.845741	0.852232	0.890533	0.758105	1.32579	1.05802	0.579307	0.929369	1.0027	1.04396	1.07207	0.94422	1.24013	1.0358
195	chr1	109881077	110383595	0.762481	1.25152	1.51997	0.987014	1.26986	1.44633	0.896857	0.532872	1.37284	0.723309	0.707749	1.02515	1.14721	0.648358	0.471319	0.851273	1.042	0.877469	1.00539	0.801867	0.966852	0.757889	1.01707	0.908657	0.963591	0.98176	0.923067	0.774293	1.00743	1.21643	0.444992	1.09003	0.989067	0.890224	0.798111	0.782335	0.991456	1.12851	0.773318	0.721171	1.27814	1.24018	1.10043	1.09404	0.978944	1.07625
196	chr1	110383596	110886689	0.858012	1.29263	1.70599	1.08133	0.843125	1.80734	1.0321	0.744458	1.41332	0.795673	0.905792	0.925382	1.2818	0.545245	0.595567	1.08066	1.10122	0.927311	0.780803	1.00516	1.11355	0.520892	1.11011	0.741206	0.850287	0.963627	1.08181	1.07371	0.874697	1.15766	0.602475	1.129	0.937199	0.922473	1.22836	0.870367	1.36053	1.0812	0.737029	0.833027	1.23429	1.42469	1.32452	1.09511	1.14822	0.87961
197	chr1	110886690	111420648	1.08097	1.09036	1.62756	0.752344	1.11064	1.77351	1.22991	0.554984	1.05548	0.746702	0.872691	1.05408	0.960002	0.576686	0.676355	1.05534	1.15403	0.72939	1.14296	1.09806	1.22772	1.0226	0.945912	1.08413	0.55771	1.19154	1.00255	1.01607	0.907678	1.45421	0.527434	1.04191	1.08254	0.830123	0.810376	0.906163	1.3163	1.08947	0.782853	1.13248	1.49083	1.0967	1.09957	1.19636	1.08568	0.813737
198	chr1	111420649	111996937	0.995691	1.16895	1.14257	1.21718	1.07024	1.29426	1.04596	0.582466	1.20989	0.697729	0.98054	0.961405	1.06505	0.467815	0.791725	0.979157	1.60234	0.91738	1.02844	1.23518	1.05709	0.797952	1.14517	0.997479	1.15123	1.26353	1.07441	0.976315	0.941062	1.49648	0.571182	1.14549	0.864846	0.858718	0.906313	1.07249	1.38958	1.25477	1.04185	0.878779	0.750812	1.41297	1.12591	0.845816	1.09934	1.24955
199	chr1	111996938	112507588	1.16617	0.990042	1.64982	1.10659	1.06659	1.9196	1.22826	0.507584	1.32703	0.745105	0.70369	0.684679	0.980835	0.558407	0.53391	0.973225	1.03583	0.633736	1.2667	1.11778	1.16647	0.793903	1.32898	0.847276	0.987327	1.15375	0.869954	1.10435	1.07925	1.25732	0.476025	1.3169	0.90345	1.01418	0.805979	0.878082	1.51594	1.0811	1.22954	0.92433	0.547613	1.31515	1.12095	0.425427	1.14742	0.946866
200	chr1	112507589	113064713	1.09277	1.18137	1.38298	1.1919	1.00149	1.29018	1.18106	0.650067	1.13801	0.767372	1.11007	0.890347	1.066	0.655258	0.606492	0.910706	1.35318	0.83491	1.02507	0.992916	1.17052	0.974149	1.42353	1.18971	1.09442	0.682578	0.923863	1.22365	1.01842	1.49003	0.635709	0.768941	0.871748	1.05436	1.03133	0.891328	0.771369	1.19769	1.02528	1.44936	1.93201	0.992126	1.43768	1.0075	0.951507	1.55156
201	chr1	113064714	113646617	1.03421	0.99145	1.56166	0.918942	1.0949	2.1437	0.84436	0.527003	0.980052	0.786445	0.821055	1.03542	0.654651	0.421782	0.566677	0.948562	1.15756	0.787771	0.771003	0.861498	0.948978	0.906773	1.16148	0.775863	1.13864	0.822244	1.01561	0.698043	1.10571	1.21227	0.559235	1.03558	0.908064	1.03224	0.899793	0.922025	1.26392	0.935824	0.924117	1.28084	1.52229	1.06434	0.96439	1.07213	1.02324	1.43864
202	chr1	113646618	114246719	0.844134	1.19206	1.13288	0.807912	1.4834	1.12158	1.03316	1.10026	1.26065	0.72264	1.28695	0.908683	0.882717	1.35509	0.85221	1.01404	1.92385	1.00561	1.20984	1.08386	1.23907	0.684137	1.22898	1.46263	0.868656	0.706067	1.02717	0.612808	0.912243	1.37994	0.883786	1.10164	0.831544	1.04528	1.03022	0.930775	0.870008	1.28691	1.14122	0.886311	1.67908	1.02013	1.17829	0.734412	1.07337	1.15667
203	chr1	114246720	114775197	0.966478	0.874901	1.00557	1.13788	1.01284	1.52723	1.12667	1.09647	1.18894	0.787402	1.17569	1.06826	1.0361	0.923885	0.999721	1.12661	1.05441	1.04043	1.00485	1.0321	1.12318	0.858162	1.25056	1.24524	1.14617	0.91294	1.142	0.662214	0.98043	1.19602	0.845499	0.900218	0.885621	1.05294	0.86483	0.65545	1.11653	1.1668	1.19149	1.16463	1.04592	0.907281	1.15616	0.724935	0.912179	0.978666
204	chr1	114775198	115369574	0.990422	1.16755	1.16172	1.0232	0.985766	1.17673	1.079	1.20216	1.36663	0.787229	1.47102	1.23277	0.825701	1.09066	0.797017	1.05807	1.07072	0.770003	1.23907	1.15215	1.08908	0.676316	0.743844	1.39868	1.21265	1.13231	1.0324	1.072	1.09451	1.41865	0.909005	1.10068	1.18217	1.01455	0.953979	1.02193	1.26732	1.28967	1.09203	0.959969	0.788316	1.0586	1.16538	0.962791	1.18549	1.53208
205	chr1	115369575	115913808	0.922475	1.07366	1.16946	0.879734	1.29846	1.30237	1.17884	0.994542	0.854098	0.801042	1.08859	1.06192	1.04531	1.07824	0.864252	0.982076	1.09004	0.885195	0.933134	1.02735	1.15888	0.904811	1.17195	0.933551	1.23402	0.921377	1.04932	0.937116	1.05278	1.47106	1.04282	1.21533	1.04257	1.07337	1.09317	0.991718	1.29332	0.924126	1.25842	0.923096	1.43216	0.811802	1.04631	0.839757	0.967539	1.52725
206	chr1	115913809	116452002	0.893153	1.25593	1.39501	1.21214	1.0783	1.40557	1.16771	1.22943	1.00857	0.885151	1.49451	0.790577	0.784498	0.993444	0.872868	0.995872	1.17185	0.794874	0.817724	1.00364	0.907319	1.0512	0.993241	1.24978	0.905126	0.807033	0.80459	0.893272	1.00851	1.42044	0.848548	0.909087	1.15193	1.15973	0.964348	0.804518	0.962368	1.13506	1.08268	1.13017	1.38336	1.03985	1.38377	0.473202	0.905009	1.31584
207	chr1	116452003	117008723	0.958041	1.05766	0.978597	0.937124	0.899433	1.12172	1.14723	0.996992	0.898521	0.948891	1.22581	0.879399	0.921239	1.29494	0.784992	1.0234	1.4031	0.797298	0.68116	0.896498	1.18199	0.615641	1.13743	1.4298	1.06176	1.1268	1.11214	0.952532	0.933908	1.35392	1.11876	1.03023	1.22267	1.18886	1.0816	0.811308	1.21532	1.21377	1.22068	0.948748	0.837338	1.16663	1.09308	0.70552	1.16851	1.5654
208	chr1	117008724	117543074	0.859443	0.780286	1.42099	0.902586	1.04971	1.35575	1.22376	1.06405	1.17749	1.20383	1.11623	1.08726	1.0555	1.09455	0.674176	0.901241	1.36958	0.91244	0.892876	0.948043	1.13404	0.867718	1.14413	1.35147	0.723535	0.953601	1.03702	0.809922	1.02444	1.37257	0.978021	1.21549	0.810634	1.15982	1.21198	0.977985	1.28498	1.08875	1.15473	1.21168	1.54816	1.15303	1.26881	0.822747	1.00496	1.39683
209	chr1	117543075	118119076	0.950847	1.03402	1.0266	0.854864	1.10193	1.09099	1.11163	0.93397	1.0285	1.20017	1.08676	1.1147	0.81354	1.27954	0.463263	0.939556	1.24213	0.955419	1.09123	1.16042	1.08058	0.716364	1.19734	1.04064	1.07355	0.786698	1.1512	1.04622	1.18903	1.51272	1.13893	1.30739	1.3032	0.984906	1.16487	0.920777	1.37728	1.0588	1.35574	0.80053	1.00739	1.79051	1.04285	0.682797	1.31256	1.43853
210	chr1	118119077	118650750	0.725336	0.901561	1.36922	1.16727	1.03475	1.0916	1.02312	0.933762	0.632748	1.0108	0.970671	0.728798	0.963996	1.01257	0.681667	0.824325	1.33859	0.790401	1.18871	1.00056	1.25057	1.28704	0.892626	1.32006	0.72359	0.868426	0.909953	1.10668	0.936458	1.24521	0.968548	0.979397	0.785649	1.1871	1.11962	0.737406	1.1913	1.22926	0.997343	0.907393	1.00916	1.55229	0.94564	0.868895	1.11192	1.15118
211	chr1	118650751	119235421	0.777051	1.16157	1.18619	1.12444	0.966244	0.887872	1.09299	0.999976	1.06108	1.01243	1.32755	0.892685	0.907745	1.1329	0.704028	0.983904	1.03109	0.995069	0.989051	0.928416	1.37879	1.2297	0.651909	1.41931	0.901832	0.980449	0.904466	1.31918	0.983518	1.20788	1.19222	1.12444	1.10944	1.00335	0.95675	0.681541	1.26794	1.25021	1.10227	1.07223	1.42892	1.51255	0.75706	1.01155	1.22254	1.1325
212	chr1	119235422	119819469	0.973231	0.939562	0.956581	0.843398	1.15928	1.58579	1.10635	1.04077	0.956904	0.993874	1.05777	0.814914	0.79028	1.22754	0.718251	1.0597	0.977662	1.02922	1.12137	1.03302	1.136	1.02419	1.06573	1.34203	1.12812	0.949751	0.990539	1.31004	1.0144	1.18129	0.940593	1.12808	1.20131	1.02237	1.04994	0.851928	1.05099	1.07672	1.31594	0.998332	1.45743	1.35914	1.41445	0.908715	1.10758	1.17294
213	chr1	119819470	120368499	0.955866	1.30131	1.20304	1.33001	0.814494	1.11963	1.31297	1.17122	1.04752	1.0737	1.11994	1.01626	0.866665	0.900609	0.760655	0.998966	1.36949	1.05112	1.04054	1.17505	1.2646	1.15354	0.940189	1.79021	0.74555	1.09154	0.921523	1.49574	1.00596	1.18691	1.26621	1.0317	1.25247	1.09343	0.996662	0.957591	1.13879	0.944487	1.08045	1.15678	1.68833	0.943116	0.962308	0.707023	1.42874	1.21919
214	chr1	120368500	120677830	0.828317	0.911848	1.04397	0.779599	0.779172	0.946646	1.12426	0.969197	0.895544	0.984472	1.13937	0.879246	0.989262	0.961103	0.797368	0.804614	1.54288	0.705253	1.01152	0.749384	1.10208	0.889847	1.24662	1.16184	1.0225	0.826412	0.760666	1.06816	1.09153	1.25117	0.93866	0.806791	0.992487	1.028	0.930248	0.884206	1.06709	1.20672	1.16874	1.01308	0.920733	0.899366	0.911912	0.837584	1.30246	1.17086
215	chr1	120677831	121247629	1.14402	1.12194	1.22995	1.26454	1.19143	1.03438	1.21482	1.1247	0.736459	1.31508	1.3578	1.14566	0.692284	0.961188	0.845553	1.03981	1.33943	0.888328	1.19024	1.28967	1.36998	1.31632	0.882474	1.27023	1.11804	0.925777	1.16858	0.903967	1.19898	1.38262	1.10483	1.25981	1.19933	1.24169	1.1769	0.806403	1.09935	1.04547	1.25353	1.06636	1.27306	1.10541	0.838283	0.713503	1.02382	1.28836
216	chr1	121247630	121484735	1.22472	1.40154	1.07118	1.16248	0.82712	1.64498	0.784996	1.16839	1.39584	1.22193	1.66316	0.894979	1.33093	0.875773	1.60147	1.62579	0.554658	1.32616	1.23238	1.74329	1.51194	1.59559	1.15464	1.93546	1.00321	1.67356	1.18672	1.25538	1.064	1.57749	1.58607	1.69992	1.51047	1.53109	1.06558	1.16478	1.83757	1.81371	1.93002	1.0837	1.00459	1.44456	1.80711	1.48918	1.12233	0.646469
217	chr1	121484736	142551914	1.05994	1.77689	0.998074	1.23181	0.648761	1.98095	0.648635	0.803202	1.58281	0.977747	1.3792	0.79592	1.01595	0.687885	1.40024	1.33675	0.559602	1.33371	1.45831	1.25364	1.28623	0.832269	1.17726	1.34965	0.844833	1.57498	0.858657	0.715004	1.01439	1.14519	1.76063	1.20018	1.23803	1.40105	0.916912	1.27676	1.22108	1.42013	1.19672	0.87204	0.403099	1.41354	1.21646	0.80633	0.879295	0.308692
218	chr1	142551915	142803208	0.872261	1.21368	0.901837	1.14588	1.02207	0.869606	1.09811	1.14297	1.008	1.21915	0.992026	0.832799	0.915699	1.11214	1.44649	1.05957	1.02839	1.29679	0.830171	1.01548	1.10871	1.01282	1.00544	0.962695	1.35415	1.14651	1.20372	1.08448	0.936407	1.13613	1.10231	1.06257	1.11552	1.00967	1.10772	0.806695	1.24845	1.19285	1.34056	0.83641	1.4248	1.14164	0.775642	1.42715	0.874829	0.825417
219	chr1	142803209	142955990	1.08071	1.43724	1.08202	0.975164	1.31678	0.941677	1.17266	1.02705	0.884094	1.0859	1.07769	1.12133	1.17902	1.0614	1.64527	1.05956	1.80593	1.37473	0.854692	1.1671	1.20531	1.24018	1.1866	0.971292	1.07033	1.02702	0.814629	1.15384	0.965369	1.3911	0.913996	0.786296	1.18173	1.19062	1.17039	0.916155	0.709983	1.10264	1.53692	0.769362	1.33279	1.05912	1.15472	1.29406	0.878291	1.06908
220	chr1	142955991	143394308	0.949394	0.984956	0.922581	0.868729	1.51394	0.962191	1.00159	1.23131	0.878773	1.22912	0.985393	0.977687	0.884863	0.999962	1.25683	0.940841	1.29086	1.03231	1.05532	0.871861	1.17845	0.946824	0.945511	0.882232	0.862971	1.24525	1.04015	0.989313	1.1108	1.18335	1.01175	1.1482	1.22148	1.03118	1.12237	0.756479	0.798031	1.14322	1.05883	0.905718	1.08831	1.01882	0.86947	1.27211	0.751391	0.943228
221	chr1	143394309	143919182	1.08885	0.97114	1.07089	1.18865	1.04382	0.962026	1.0364	1.21968	0.934197	1.2216	1.34368	1.09331	1.06173	0.95994	1.14837	1.17079	1.14046	1.12671	1.36086	1.17861	0.976275	0.9865	0.88957	1.30715	1.09358	1.20394	1.05589	1.25358	1.07321	1.51822	0.818801	0.957227	1.15535	1.0443	0.950636	1.10008	0.693939	1.17196	1.21367	1.06498	1.26696	0.932102	0.750749	1.30394	0.979269	0.984
222	chr1	143919183	144381013	1.10842	1.16323	1.42936	0.912995	0.862552	1.09852	0.918129	0.947816	1.05657	1.32009	1.22826	1.01995	0.756399	1.00727	0.706984	1.01165	1.08504	0.791119	1.06078	0.706455	1.19249	1.25952	0.89171	1.26098	1.57387	1.17028	1.20141	1.14696	1.23246	1.44727	0.857164	1.0308	0.924572	0.908211	0.961561	1.08073	0.976758	1.03462	1.04387	0.883812	0.651367	0.956035	1.1754	0.859337	0.831741	0.839914
223	chr1	144381014	144891764	0.933806	1.13639	1.01691	0.775419	0.996767	0.842176	0.944214	1.04808	0.924547	1.18372	1.1469	0.976973	1.11996	1.04999	0.591537	0.980627	1.11281	0.781328	0.892207	0.595478	1.12219	1.14592	0.92813	1.25935	1.1707	0.87718	0.995045	0.971962	1.07706	1.34054	0.883265	0.955937	0.90158	0.982235	0.896467	0.993807	0.682296	0.741544	0.940083	1.15348	1.01375	0.960009	1.1775	0.851618	0.838015	1.01837
224	chr1	144891765	145075864	0.7064	1.07286	0.772868	0.795139	0.513111	0.862541	0.778353	1.08934	0.754074	0.879298	0.754432	0.83039	0.770453	0.925996	0.523193	0.641428	1.0836	0.758558	0.726684	0.609434	1.07549	0.653631	1.26496	1.11982	1.16478	0.80551	0.927219	0.871722	0.989503	1.12127	1.05708	0.850222	0.770135	0.834647	0.877842	0.784771	0.845997	0.729715	1.05834	0.941292	0.791779	0.77009	0.753762	0.777186	0.85774	1.07019
225	chr1	145075865	145270683	1.1638	1.12313	0.962729	0.973345	0.858341	1.14211	1.02306	0.831541	0.840677	1.15107	1.32044	1.06226	0.967653	0.87195	0.790882	0.811237	1.42077	0.764131	0.996065	0.824426	1.25379	0.926275	0.941077	1.2536	1.12773	0.866557	0.7878	0.883889	1.04611	1.39143	1.01106	0.755478	1.04941	1.17521	0.973144	0.975683	1.32182	1.00321	1.31797	0.745098	0.793164	0.822482	0.875331	0.940028	1.01187	1.07185
226	chr1	145270684	145701590	1.20956	0.913262	0.889197	1.04379	0.876258	0.991397	0.911766	0.967131	0.897881	1.1363	1.43561	1.02943	1.02828	1.16751	0.587479	0.929572	1.26967	0.725615	1.03304	0.995735	1.03935	1.05518	1.0976	1.40974	0.933168	0.876153	0.94604	0.770928	0.999607	1.4838	0.920212	0.853473	1.2542	1.02053	0.748655	0.951384	1.26815	0.961611	1.06379	1.09371	1.02215	0.964305	0.908761	0.966496	0.789813	1.00538
227	chr1	145701591	146228446	1.15555	1.08214	1.13804	1.10104	0.775128	1.32851	0.935401	1.10542	1.10375	1.05295	1.27436	0.943818	0.89221	1.2181	0.747456	0.944577	1.13448	0.917686	1.25417	1.2504	1.15087	0.917437	1.13932	1.0789	1.03829	1.1271	0.99127	1.08546	1.02544	1.5615	0.983271	1.19863	1.19383	1.04227	0.969725	1.22523	0.855836	1.00998	1.51362	1.09419	1.25085	1.05295	0.810793	1.03248	0.910567	1.34488
228	chr1	146228447	146872036	1.11164	1.17095	0.98499	1.02398	0.954879	1.15629	1.07615	1.10875	0.686363	1.21862	1.27554	1.18725	0.732171	1.19196	0.705601	0.87783	1.2504	1.13403	1.06146	1.22259	1.21208	0.818753	1.26721	1.21296	1.12124	0.889166	0.958512	1.10805	1.28002	1.60539	0.956309	1.23276	1.10527	1.14179	1.06252	1.01883	1.1102	1.12962	1.31702	0.989649	0.785775	1.1352	0.935067	1.24315	1.15713	1.26404
229	chr1	146872037	147416456	0.982992	1.14831	1.00027	1.11318	1.1862	1.45635	1.04424	1.14905	0.865749	1.09682	1.08872	1.07932	0.928266	0.869102	0.709803	0.912907	1.58667	0.842572	1.15323	0.979678	1.04561	0.701599	0.996499	1.22376	0.911892	1.15583	1.13779	1.16579	1.00572	1.45884	0.782142	1.0053	1.17354	0.999145	0.885546	1.10969	0.936465	0.788926	1.27799	1.05968	1.02975	0.957956	0.979066	0.883232	0.890345	1.38915
230	chr1	147416457	147894833	1.15764	1.16555	1.15532	1.06434	1.00283	1.1565	1.05609	1.14029	1.05856	1.10662	1.23911	1.00644	0.90056	1.34946	0.754959	1.00553	1.11045	0.981189	1.0429	0.855686	1.22758	0.765039	1.06574	1.1548	1.23768	0.993728	1.08334	1.00171	1.10713	1.50309	0.998161	1.06454	1.1589	0.981978	0.912764	1.04704	0.738713	1.17477	1.3581	1.05726	1.4168	0.954376	0.951882	1.26941	0.830958	1.21674
231	chr1	147894834	148584795	1.18301	0.927762	1.1426	0.961457	0.947903	1.00542	1.01278	1.14121	0.861982	1.12567	1.37695	0.866408	1.20101	0.804813	0.671456	0.916856	1.20595	0.794604	1.16294	0.780583	1.17158	1.00574	1.12828	0.968431	1.23831	1.30706	1.04913	0.970214	1.3991	1.38805	1.02854	1.02952	1.2054	1.02812	1.11219	1.00038	1.14002	1.16436	1.46373	1.13674	0.691882	0.98848	0.912911	1.00177	0.856401	1.10382
232	chr1	148584796	148897381	0.907	1.12675	1.08855	1.08746	1.1516	0.888315	1.14583	0.965501	0.859354	1.09836	1.63437	1.3263	0.984988	0.859199	0.804304	0.998303	1.30521	0.900628	1.30202	1.00829	1.36151	0.949107	1.11398	0.893929	1.03861	0.923684	1.12191	0.776336	1.1869	1.5996	1.07783	1.0739	0.937074	1.16254	1.09931	0.932951	1.31588	1.22237	1.17295	1.20546	0.91431	0.699768	0.986626	0.989087	1.10978	1.18587
233	chr1	148897382	149285620	0.974372	1.0104	1.2217	1.03439	1.0193	1.03698	1.02457	0.876741	0.915782	1.43954	1.03461	0.757135	0.948526	0.910335	0.782083	1.01101	0.74996	0.83811	0.867761	0.851338	0.997963	0.814954	1.10489	1.20329	0.723667	0.804594	1.14478	0.798651	1.12912	1.22122	1.02246	0.87322	0.767063	0.962371	1.02081	0.981538	0.836766	0.932246	1.11648	0.985755	1.29617	0.738902	1.03156	0.948222	1.2257	0.92677
234	chr1	149285621	149695848	0.918548	0.925439	0.920276	1.38436	1.09296	1.28177	1.03021	1.10767	1.10269	1.21533	1.20029	1.01875	0.937372	0.871108	0.876308	1.01495	0.957107	1.01718	1.0017	0.932428	1.16263	0.651893	1.06266	1.47592	1.10783	0.869304	1.19155	0.91022	1.09311	1.51898	0.992277	1.32459	0.88536	1.07151	0.970113	1.25993	0.966104	0.970931	1.13498	1.25313	1.15473	1.02657	1.19251	0.865818	0.927367	1.17388
235	chr1	149695849	150167229	0.886256	1.00894	0.816688	1.16198	0.969301	1.24474	0.898025	1.27577	0.999075	0.961015	0.893869	1.11539	0.971868	0.718954	0.741121	0.896614	1.38436	0.937007	1.12482	0.818729	1.19251	0.692288	0.89967	1.45955	1.10082	1.06561	0.889473	0.669162	1.02948	1.41346	0.798148	1.08142	0.854686	1.05141	0.975749	0.882498	0.967205	1.0041	1.16569	0.986996	0.896948	0.924364	1.11558	0.955845	0.955728	1.39885
236	chr1	150167230	150733233	1.02348	1.18489	1.00087	0.986077	1.07841	0.759454	0.73304	1.11642	1.03904	1.02827	1.18403	1.13374	0.81284	0.949853	0.581894	1.01341	1.18445	0.821709	0.970911	0.963338	1.18026	0.912305	0.961581	1.11141	1.01914	0.888307	1.0354	0.747898	1.06004	1.63123	0.963138	0.99764	0.740391	0.99891	0.777433	0.863729	1.11417	1.07621	1.22624	1.17067	0.188682	0.876265	1.45053	1.23798	0.749886	1.1347
237	chr1	150733234	151288955	0.969829	1.12669	1.02834	1.15131	1.00409	1.44149	0.692387	1.25639	1.14865	1.06678	1.50668	1.41964	0.740562	1.01649	0.891842	1.10484	1.20816	0.99933	0.969249	0.692076	1.28576	0.86059	1.29725	1.3091	1.01687	1.00207	0.826299	0.973204	0.90017	1.38239	0.883559	1.0565	0.928683	1.04707	1.05409	0.712862	1.08859	0.988904	1.00235	1.05646	0.13948	0.907974	1.48804	0.672535	1.00705	1.42771
238	chr1	151288956	151831754	0.998427	1.02901	0.999908	0.950903	0.939443	1.17441	0.887976	1.0207	0.681684	1.28989	1.10168	1.13817	1.08174	0.913382	0.886302	0.990034	1.18309	0.813193	1.15775	0.779731	1.18809	0.575813	1.06738	1.37641	1.26846	0.95867	0.954353	1.19208	0.816482	1.43477	0.842629	1.06508	0.743288	1.08942	1.00638	0.859743	1.22304	0.762433	1.39409	0.95429	0.739824	0.905518	1.12458	1.22658	1.12821	1.21264
239	chr1	151831755	152420834	0.899587	0.90052	1.15951	0.978373	0.966388	0.816496	0.880128	0.899525	1.05952	1.29673	1.21412	0.822347	0.887237	0.669498	0.997536	0.878923	1.11724	0.995463	1.04132	0.846549	1.27431	0.96313	1.42032	1.09168	0.987297	1.067	0.885948	0.975183	1.02994	1.79917	0.994159	0.706618	1.34723	1.11293	0.893123	0.726054	1.09605	1.13079	1.00418	0.951949	0.654698	1.03041	0.872072	1.15061	1.0741	0.849492
240	chr1	152420835	153003251	1.12732	0.996215	1.1228	1.12669	1.01135	0.994575	1.02773	1.08086	1.11974	1.46157	0.894903	0.789113	1.0962	0.715891	1.10841	0.853238	0.53731	1.17664	0.800892	1.13661	1.1239	0.9098	1.04728	1.18398	0.733325	0.987711	0.938411	0.954511	1.18943	1.64136	0.885734	0.956964	0.988858	1.03818	0.949361	0.783629	1.12938	1.21726	0.76851	0.953115	0.876675	1.0599	0.748294	0.829978	0.90692	0.349721
241	chr1	153003252	153558846	1.09972	0.909893	1.29549	0.908188	1.13753	1.09133	0.771584	1.02184	0.901182	1.48472	0.949321	0.582395	1.14605	0.964949	0.997898	0.992417	0.520891	1.11396	0.853106	1.02954	1.20329	0.83708	1.46862	1.18817	1.01926	1.46346	1.20954	0.893359	1.03253	1.64957	0.937796	1.32594	0.759812	1.16684	1.02175	0.848958	0.873385	1.49266	1.15935	1.1253	0.384076	0.934612	1.04205	1.18767	0.701847	0.532495
242	chr1	153558847	154128572	0.949046	1.0286	0.935743	0.956532	0.990327	1.34678	0.815498	1.00697	0.565377	1.38669	1.09831	0.918546	1.01076	1.065	0.887354	1.05262	0.961961	0.833696	0.955751	1.06688	0.990004	0.818195	1.10641	1.1284	0.953573	1.10159	1.07269	1.08043	0.831686	1.31429	1.01697	1.17467	1.17758	1.12191	0.814051	0.82839	1.40227	0.710805	1.34356	0.970928	0.323284	0.786205	0.982761	0.88629	0.919117	1.01136
243	chr1	154128573	154672094	1.00582	1.18561	1.00147	1.04504	0.742059	1.08766	0.889372	1.17806	0.774928	1.23576	0.774219	0.894664	1.09067	0.931706	1.00396	1.10936	1.03991	0.904326	0.974376	1.2757	1.18377	0.794162	0.925678	1.12134	1.34179	1.22006	1.08417	1.03325	1.07973	1.21575	1.02486	0.958034	0.660587	1.16258	0.937892	0.94271	0.626617	0.945902	1.08925	1.12039	0.803373	0.809037	0.94244	0.683706	0.981931	1.014
244	chr1	154672095	155179058	1.06323	1.1841	1.16751	0.811824	0.849336	1.41488	0.877448	1.16421	0.96544	1.45306	0.791825	1.08193	0.711204	0.986286	0.497635	0.937611	0.952448	0.880252	1.15224	0.758186	1.03575	1.11279	1.09548	1.2348	1.06422	1.1141	0.973057	1.07491	1.34125	1.32407	1.02568	0.7844	1.10134	1.01558	1.08862	0.741619	1.16297	1.28353	1.14196	1.04437	0.635922	0.974574	1.20706	1.35459	1.18521	1.17543
245	chr1	155179059	155732175	1.28486	1.04195	1.04107	0.572067	1.02216	1.20374	0.782289	0.806843	1.37915	1.37383	1.18807	1.0205	0.791939	1.18008	0.758703	0.947593	1.03716	0.841182	0.951686	0.981276	1.13486	0.783296	1.57448	1.07356	1.21903	0.926235	0.893258	1.12669	1.0401	1.12907	0.985232	1.05167	0.597174	1.08139	0.997583	0.644117	0.606367	1.05163	1.11521	0.89671	0.649882	0.938002	1.17116	1.68793	0.84593	0.922635
246	chr1	155732176	156290015	1.02892	1.14669	0.890825	1.25307	1.35092	1.23669	0.919642	0.966405	0.546586	1.10761	1.19931	0.910376	1.22202	0.912057	0.416819	1.09265	1.11149	1.16071	0.988101	0.712248	1.04094	0.794745	1.74504	1.3653	0.871063	1.21015	1.35872	0.947982	1.08388	1.19925	0.986686	1.19926	0.677929	1.10356	0.858693	0.845438	0.909115	0.965657	1.36522	0.906587	0.724947	1.03844	1.40398	1.01926	0.990058	1.21774
247	chr1	156290016	156834759	1.01526	0.959925	1.1423	1.03188	0.932761	0.850158	1.24167	0.916326	1.64122	1.59684	1.44038	1.03073	1.61647	1.06027	0.595838	1.0837	0.790445	1.13795	0.921864	1.2111	1.07342	0.817104	0.950526	1.51113	0.718439	1.24197	0.966815	1.10518	1.06192	1.24858	0.935843	1.23178	1.41825	1.14248	0.797568	0.771862	0.994056	0.94046	0.961442	1.17656	1.48942	0.993511	1.0452	0.984799	1.28698	1.09342
248	chr1	156834760	157371633	1.21458	1.06206	0.98949	0.982456	0.936464	1.26372	0.989648	0.835851	1.33771	1.47645	0.765294	0.76251	1.03035	1.05649	0.926686	1.02509	0.672007	0.898789	0.666372	1.07472	1.021	1.1049	0.817379	0.993615	0.809787	0.888094	1.02821	0.677084	1.03326	1.49568	1.11825	0.856395	0.909744	1.18007	0.7927	0.805677	0.792285	1.09996	1.01613	0.656352	1.43865	0.77764	0.76655	1.15089	0.893124	1.40403
249	chr1	157371634	157952229	1.04218	1.21524	1.46642	0.853567	1.25529	1.15972	1.0538	1.38565	1.17589	1.62699	0.783162	0.962256	1.12995	0.850098	0.703741	1.00867	0.723177	0.976394	0.924353	1.2499	1.24088	1.11069	1.26596	1.05732	0.987029	0.877178	1.28585	1.04787	1.21373	1.72613	1.17102	0.916099	0.919809	0.972817	1.24871	0.73501	0.899141	1.35283	1.51514	0.766134	1.60971	0.934063	1.26218	1.09932	0.942695	1.25858
250	chr1	157952230	158546027	0.984377	1.26879	1.28025	1.02537	1.36343	1.5583	0.962669	0.936141	1.61343	1.49365	0.951901	0.42111	1.20321	0.952289	1.13591	1.00223	0.825581	0.942483	1.04653	1.14631	1.12428	1.036	1.37907	1.3223	1.25236	1.07489	0.958626	1.2402	1.19088	1.68859	1.23803	0.876637	0.984269	1.08629	1.10343	0.638624	1.41336	1.12555	1.06147	1.03407	1.00267	1.03814	1.24022	1.13335	1.22578	0.675572
251	chr1	158546028	159163913	1.02428	1.43332	1.22428	0.897317	1.38836	0.801597	1.11736	1.32538	1.4561	1.5931	1.1665	0.604092	1.03721	1.26269	0.854135	0.973822	0.714462	1.0139	1.44419	0.783092	1.13862	1.24037	1.26101	1.1661	1.18924	1.1271	1.37461	1.22754	1.20619	1.74263	1.21381	1.17467	1.04017	1.09309	1.06971	0.688909	1.19313	1.21362	1.37208	1.25524	1.37046	1.01281	1.1728	1.49891	1.12781	0.897498
252	chr1	159163914	159772952	0.815957	1.1168	1.1323	1.22005	1.17782	0.988688	1.00172	0.951932	1.17551	1.50528	1.18578	0.486318	1.25218	0.94855	1.16325	0.843298	0.837211	1.07628	1.09874	1.10742	1.00518	1.01798	1.22499	1.56422	1.20528	0.911085	1.12064	1.03879	1.15031	1.71015	1.16445	0.983904	0.837439	1.09557	0.860593	0.705109	0.758118	1.03615	1.38424	1.1319	1.06698	1.05453	1.24363	1.04705	1.02815	0.775146
253	chr1	159772953	160280508	0.961929	1.02867	1.0906	0.908828	1.11875	1.20877	0.901474	1.09969	1.30705	1.28724	1.05293	1.04528	0.907734	1.14686	0.868233	1.0404	1.08694	0.874392	0.949051	1.01466	1.10812	0.918373	1.06445	1.40706	1.04825	0.927443	1.20553	1.06586	1.26769	1.6316	0.840719	0.996444	0.929189	1.14785	0.971514	0.763335	0.969231	0.96337	0.987338	1.08529	0.890767	0.969879	1.01791	1.52969	1.12698	1.29005
254	chr1	160280509	160833078	1.33906	1.23126	1.40878	1.13798	1.10603	1.26977	1.10813	0.984927	1.16706	1.36499	1.01799	0.730145	1.24772	0.95926	0.792173	1.10486	0.686537	0.974546	1.20234	1.19024	1.21838	0.895732	0.82061	1.45074	1.17006	0.913601	0.866854	0.951538	1.11221	1.80991	1.05907	1.07436	1.25287	1.10038	1.04744	0.779613	1.17606	1.03774	1.35944	0.890809	0.903595	0.906649	1.07988	1.24927	0.892942	1.01498
255	chr1	160833079	161414670	0.915582	0.736407	0.790453	1.16303	0.885125	1.16736	0.83602	0.824433	1.1098	0.984203	1.11014	0.962888	0.972945	0.909048	1.2796	1.18051	0.728445	1.01586	0.915306	0.975215	1.08209	0.895774	0.63392	1.36887	1.08651	0.913675	1.338	0.926338	1.18854	1.23936	1.08793	1.02984	0.898479	1.16333	0.8066	0.680117	0.758841	1.39392	1.22937	0.897687	1.69521	1.10568	0.971371	1.15603	1.11343	1.34745
256	chr1	161414671	161885696	0.916097	1.15282	1.10362	0.558168	0.919662	1.19758	1.24538	0.892069	1.09133	0.930767	0.96736	0.828612	1.14861	1.02372	0.688795	1.0547	0.869314	0.968927	0.984862	0.641444	1.11947	0.932579	1.40073	1.16607	1.02888	1.14899	0.949346	1.01434	1.0909	1.64337	0.78294	1.08904	0.864	0.911316	0.877562	0.752681	1.11834	0.800311	1.00127	1.12907	0.0858967	0.788712	1.00598	1.18835	0.91236	1.35642
257	chr1	161885697	162431275	0.925482	0.854791	1.11536	0.814911	1.20986	1.3957	1.11396	0.96685	0.932427	1.07643	1.04426	0.864077	1.0398	0.868081	0.592391	1.01764	0.686367	0.805732	0.862688	0.96383	0.911031	1.394	1.20681	1.11338	1.09339	0.737016	1.00391	1.10263	0.99621	1.26851	1.06597	1.06108	0.798902	1.08457	1.02657	0.726808	0.796736	0.899478	1.23893	0.976468	1.01774	1.18553	1.11742	0.848547	1.08684	1.5501
258	chr1	162431276	163004459	1.15785	0.940587	1.04514	1.04674	0.949692	1.25951	1.24693	1.60592	0.794112	1.05717	0.679015	1.35534	1.27644	0.972373	0.603815	0.854982	1.11264	0.94069	1.05208	0.880577	1.01006	1.21459	0.997762	1.24448	0.861724	0.822281	0.9277	0.95624	1.38959	1.20581	0.861377	0.866252	0.749944	1.0702	1.02481	0.869427	1.38301	0.851256	1.20029	1.01211	0.582459	1.16072	1.33778	0.777357	0.967379	1.14607
259	chr1	163004460	163588000	0.914248	1.05926	1.03256	1.13655	1.29465	1.19003	1.40282	0.95085	0.835613	1.02221	0.685342	0.959368	1.127	0.953335	0.833466	1.00738	1.28974	0.773904	1.05194	0.880963	1.01455	1.15758	0.884229	1.44384	1.17247	1.25087	1.05253	0.97646	1.43271	1.10521	1.15672	0.994619	1.21636	0.916526	1.07758	1.03604	1.16818	0.912487	1.33819	0.830043	0.733776	1.43991	0.658585	0.682887	0.999279	1.18383
260	chr1	163588001	164196895	1.09352	1.14547	1.03088	0.70915	1.13399	0.916859	1.38442	1.30999	0.927534	0.847352	0.71375	1.16221	1.38566	0.510207	1.37383	0.967094	1.17342	1.06868	1.3775	1.09848	1.13535	0.878412	0.871459	1.49447	1.19455	0.962458	0.898933	1.17257	1.51692	1.10592	0.944264	1.14709	1.31523	0.99939	1.26127	1.11362	1.34594	1.14681	1.66646	1.25366	0.61377	1.22389	1.18281	0.941399	1.24507	0.75638
261	chr1	164196896	164775077	1.04194	0.953163	1.02388	1.04792	1.22973	1.22724	1.39486	1.21062	1.12591	1.13145	0.707532	1.01733	0.764749	1.17207	0.951928	0.913303	1.02606	0.959978	1.01239	0.813049	1.19627	1.16878	0.996977	1.15199	0.893036	1.26584	0.968092	1.13126	1.3762	1.77039	1.23763	1.09601	1.19577	1.02877	1.10892	1.1458	1.30316	1.05608	1.38654	0.837017	0.661074	1.29365	0.97511	1.49627	0.836365	0.720148
262	chr1	164775078	165315421	1.04825	0.894165	1.08637	1.23897	1.15109	0.908366	1.12405	0.935945	1.00356	1.33348	0.449744	0.76042	0.955223	1.06749	0.735884	1.11749	0.95912	0.945111	1.14004	0.849875	1.03182	0.755538	0.787496	1.49325	1.23827	1.06986	1.06461	1.11662	1.07974	1.43098	1.01255	1.30666	1.18218	1.01329	0.836968	0.917839	1.32503	0.991014	1.07232	1.13602	0.69844	1.23393	1.38124	0.967788	1.28763	1.00946
263	chr1	165315422	165875418	1.02642	1.1854	1.03269	0.883803	0.960322	1.55593	1.08894	0.899404	1.24427	1.23201	0.834087	1.28203	1.27431	1.01721	0.978163	1.06955	0.886734	0.745207	0.979176	0.813469	1.12478	1.19997	1.21668	1.53833	0.70909	1.20974	1.02095	1.12284	0.963341	1.25656	1.03153	1.24132	1.04695	1.07695	1.24799	1.08246	1.29251	1.11687	0.722307	1.18005	0.374233	1.06947	1.07911	0.969357	0.987778	1.59608
264	chr1	165875419	166483608	1.01622	1.17924	1.06607	1.21598	1.08339	1.6433	1.27816	0.947983	1.28992	1.24322	0.892881	0.87296	1.08528	1.2748	1.09196	1.11376	0.888325	0.910989	1.2628	1.07003	1.03643	1.73091	1.01987	1.29127	0.905822	1.42536	1.20661	1.14098	1.05002	1.66673	1.08029	1.4419	1.22473	1.11256	1.31387	0.753242	1.27025	1.11892	0.75161	1.40855	1.26367	1.00792	1.16353	1.41667	1.24499	1.14905
265	chr1	166483609	167078826	0.992941	1.20534	1.36868	1.02776	1.28351	0.933537	1.02088	1.10205	1.49043	1.09187	0.850556	0.963372	0.955298	1.00186	0.795953	1.25731	0.895809	1.19264	1.03014	1.41375	1.00977	0.820321	0.822215	1.35531	1.02282	1.14952	1.22272	1.26672	0.879999	1.66365	1.15129	1.17754	1.32055	1.0647	1.17795	0.927768	1.38024	1.40552	0.872717	1.39489	0.87299	1.06592	1.12407	1.12549	1.08521	1.35157
266	chr1	167078827	167647336	0.886674	0.975324	1.07956	1.16507	1.22633	1.73448	0.893498	1.01183	0.883116	1.28976	0.861236	0.985723	0.876099	0.865874	0.774749	1.08641	0.580499	0.997747	0.901146	0.90167	1.03776	0.918005	1.04881	1.69379	1.03907	0.845149	0.897111	1.20663	1.12102	1.4404	0.939427	0.927387	0.896176	1.15952	0.947177	0.906226	1.42327	1.29116	1.03453	0.931402	1.31854	1.13931	1.20285	0.844367	0.892114	1.04813
267	chr1	167647337	168224832	1.02031	1.17797	0.913052	1.04573	0.963196	1.11402	1.03923	0.832443	0.905909	1.1217	0.938584	0.954655	0.746512	1.14073	0.656428	0.970105	0.890612	0.94369	0.927814	0.857379	1.1074	0.821313	0.885867	1.09714	0.986631	0.892905	0.944875	0.795525	1.04259	1.15249	0.993292	1.11888	1.1897	0.987656	0.788269	0.797095	1.11855	1.06579	0.908838	1.3453	1.14318	0.966503	1.11346	1.08151	0.928783	1.22697
268	chr1	168224833	168776108	1.02125	1.14006	1.17312	1.10431	1.18904	1.38354	1.26515	1.3116	0.739326	1.01037	0.915586	1.03066	0.896178	0.989853	1.01883	1.00836	0.649139	1.07102	1.09756	1.36217	1.09231	1.16948	1.19693	1.19758	0.913111	1.16286	0.875959	1.26127	1.13364	1.31449	0.849838	1.29521	0.871009	1.04324	1.18082	1.01175	1.63553	0.987052	0.872199	1.01258	1.7755	0.976231	1.19732	0.901435	1.11124	1.33541
269	chr1	168776109	169361735	1.21589	0.957804	0.901493	0.970229	1.17669	1.49684	1.17864	1.23529	1.21963	1.00071	0.866965	1.19049	1.00823	1.1576	0.741924	1.23117	0.802364	0.885153	1.30303	0.847473	1.03024	1.35065	0.885649	1.5903	0.95451	1.06037	0.858363	1.23663	1.15276	1.31732	1.03389	1.10673	0.870155	1.22301	0.86825	0.796683	1.56379	0.962766	0.913979	0.866305	0.790339	1.10349	1.13688	0.598453	0.968262	1.4876
270	chr1	169361736	169953516	0.969961	0.954173	0.83213	0.842484	0.940765	1.44952	1.29218	1.09548	1.07446	1.17836	0.697192	1.16009	1.19907	1.11254	0.808257	0.950715	1.16893	0.9834	0.873823	0.887792	1.18897	1.00452	1.33342	1.44139	0.85751	0.986675	1.04542	0.913549	0.902686	1.63223	1.00744	0.967906	0.889429	0.975171	0.905418	0.988833	1.06482	1.02675	0.922963	1.0135	0.292359	0.966198	0.994786	1.12766	0.956975	1.5402
271	chr1	169953517	170550450	1.03575	1.15336	0.83589	0.825836	1.05398	1.16587	0.960769	0.982054	1.14738	0.990371	0.89566	0.818546	1.22011	1.10851	0.951513	0.82723	0.714488	0.842721	0.85146	0.808626	0.999538	0.921341	0.879764	1.33777	0.976622	1.40044	0.602542	1.04949	1.02171	1.01631	1.03539	1.10364	0.971457	1.05328	0.976789	0.907291	1.31249	1.17596	0.896894	0.956397	0.720437	0.900472	1.27991	0.984763	1.12335	1.3872
272	chr1	170550451	171130283	1.10369	1.24168	1.0993	0.956879	0.873688	1.05865	1.03276	0.885214	0.958176	1.17382	0.8467	0.722843	0.896849	1.13349	1.14827	1.12783	1.16762	0.961741	0.912599	0.816046	1.08233	1.35679	1.12578	1.58489	1.09855	0.910217	0.932387	0.940334	1.08022	1.22443	1.08127	1.27008	1.1514	0.984245	1.00103	0.792776	1.3678	1.26432	0.703044	1.05598	1.19456	1.08549	1.2666	1.16382	1.03827	1.37235
273	chr1	171130284	171709197	1.12386	1.1202	0.892654	1.07407	1.13464	1.23355	1.11839	1.33654	1.37275	1.28544	0.933517	1.11422	0.841318	1.07183	1.04253	1.0398	0.964222	0.851988	1.05083	1.11531	1.36052	0.982418	0.958435	1.25488	0.712879	1.55305	0.855194	0.96517	1.17636	1.28266	0.944817	1.23126	1.46789	1.00534	1.01979	0.758012	1.69233	0.894956	0.871497	1.03093	1.02864	0.921832	0.812774	0.961656	0.780839	1.18966
274	chr1	171709198	172294041	0.954243	1.13481	0.854064	0.766539	1.03873	1.1267	1.06628	1.19856	1.21933	1.03783	0.870228	0.62456	0.760162	1.01816	0.932439	1.01872	0.828098	0.865894	1.15975	0.833837	1.07513	0.964361	1.42592	1.21908	1.30885	0.871146	1.13589	0.918405	1.27987	1.09284	0.833421	1.27028	0.692025	0.895777	0.988443	0.986483	1.24746	1.32579	0.85472	0.857338	1.37219	1.00124	0.870104	0.809141	1.0053	1.31853
275	chr1	172294042	172861202	0.919271	1.25079	0.998534	1.34331	1.1903	1.33549	1.1243	1.05121	1.23915	1.16098	0.977728	1.05182	1.06916	1.12161	1.29854	1.15148	0.893403	0.85562	0.9507	1.02578	1.26499	1.03392	1.02543	1.29751	0.810587	1.03601	1.11059	1.16114	1.00533	1.25399	0.767328	1.18212	0.786273	1.07656	1.14726	0.683235	1.13121	1.13624	0.698729	1.08182	1.56528	0.829822	0.900084	0.959571	0.9365	1.41857
276	chr1	172861203	173429987	1.06418	1.24155	1.20882	1.11358	1.11424	0.972804	1.13044	1.15027	1.10991	1.31158	1.03704	1.05316	0.772547	1.1664	0.947994	1.16274	0.724096	0.801875	0.896297	0.699979	1.28579	0.866629	0.938985	1.22945	1.27404	0.973652	0.979009	1.13768	1.32359	1.35037	0.944302	1.41711	1.38373	1.02386	1.047	0.87492	1.08522	1.12924	1.0149	0.909013	0.862361	0.927504	1.1971	1.09409	1.07054	0.899071
277	chr1	173429988	174048820	1.03538	1.11141	1.02553	1.25812	0.91576	1.13288	1.10034	1.60109	1.14049	1.07131	0.981884	0.992405	0.794836	1.25325	1.02121	1.04211	0.539858	1.17904	1.11194	1.10432	1.12213	1.0554	0.97616	1.24594	1.11295	1.47855	0.913914	0.778897	1.32136	1.06593	0.800003	1.49582	1.04181	1.14135	1.04769	1.01321	1.27925	1.32456	0.995881	1.24988	1.09279	1.08456	1.00099	0.749512	0.851739	1.13031
278	chr1	174048821	174718058	1.22039	1.2247	0.950045	0.928149	0.811354	1.20242	1.13171	1.46824	0.955821	1.06231	1.12482	1.20535	1.19453	1.00997	1.16963	0.996496	0.884491	1.10326	0.969102	1.17043	1.08521	0.677151	1.1622	1.38609	1.16778	1.30327	1.07545	0.812408	1.02033	1.26685	0.85713	0.952426	1.37284	1.19151	0.900369	1.05846	1.59678	1.13229	0.84645	1.23209	1.37945	1.03127	0.872863	1.34166	0.826093	1.11785
279	chr1	174718059	175291788	1.17152	1.22219	0.930141	0.747079	0.768605	1.3531	1.09758	1.18195	0.812468	1.0975	0.861786	1.03364	1.04212	1.05278	0.885616	0.941479	0.922942	1.10581	1.10894	1.22972	1.31054	0.724268	1.09454	1.36259	1.02789	0.868416	1.01975	0.797062	0.968925	1.44548	0.798197	1.16631	1.25777	1.0128	0.88227	0.77563	1.20231	1.07151	1.03557	1.18627	1.1915	1.1505	1.15769	1.60193	0.715824	1.29928
280	chr1	175291789	175811133	0.952307	1.14872	1.10921	1.08898	0.795924	1.06648	1.19536	1.02573	0.859333	1.49153	0.974015	0.899992	0.907625	1.03707	0.870567	1.16261	0.707151	1.06537	0.991189	0.834242	1.22462	1.25158	0.667635	1.57566	0.834885	1.05263	1.18451	1.14667	1.01253	1.51935	0.836391	1.1505	1.17882	1.20205	0.919603	0.830692	1.29472	1.1341	0.880565	1.20118	1.40157	0.966851	1.42234	0.828224	0.957839	1.08462
281	chr1	175811134	176430506	1.16123	1.20282	0.953258	1.09142	0.766912	1.4489	1.20945	1.09182	1.23922	1.09067	1.00495	1.35767	0.754742	0.96142	1.2899	1.08205	1.05299	0.917387	1.13272	1.09661	1.18763	1.10529	0.943617	1.52204	1.15449	0.953868	1.00353	0.835218	1.11127	1.32337	0.767382	1.18214	1.27012	1.09616	0.819529	0.911061	1.31976	1.21918	0.637156	1.13599	1.35064	0.801298	1.08958	1.04669	1.00726	1.49756
282	chr1	176430507	176987176	1.09762	1.05729	0.981972	0.999813	1.28483	1.36073	1.14776	1.27611	0.988026	1.17837	0.864859	1.10755	1.04974	1.01523	1.11037	1.002	1.02119	1.07642	1.18466	0.996743	1.01514	1.12414	1.47891	1.64575	0.863952	1.16267	1.17668	1.24725	1.01003	1.39853	0.912584	1.10409	0.929233	1.01789	1.01789	0.885163	1.21618	1.20508	0.958801	1.28144	0.960027	1.02222	1.42986	1.14781	1.09346	1.42081
283	chr1	176987177	177519882	1.16429	0.988181	1.0222	0.717219	1.04793	1.40701	1.05134	1.08736	0.836459	1.30384	0.949836	0.788074	0.9386	1.06009	1.17201	1.02744	0.715628	0.88796	0.893243	1.30722	1.12629	0.890112	1.20979	1.4714	1.31003	0.612119	0.911505	1.13057	0.996819	1.28282	0.779479	0.991102	1.2823	1.01459	1.12111	0.883864	0.976357	1.07205	0.849383	1.084	0.962287	1.10631	1.50589	1.20989	0.745735	1.62202
284	chr1	177519883	178071529	1.05492	1.17695	0.884801	0.874967	1.39843	1.23323	1.42545	1.01372	1.05383	1.34926	1.01624	1.31288	0.751533	1.16317	1.08794	1.05641	1.01848	1.09041	0.987448	1.08686	1.16533	1.10647	1.09975	1.1166	0.981138	1.11179	0.9817	0.838004	1.20947	1.3125	0.931155	1.22229	1.10891	1.13207	0.908218	0.97323	0.80164	1.09055	0.820942	0.990826	0.601886	1.25172	1.42811	1.02332	1.30311	1.47252
285	chr1	178071530	178617151	1.04183	1.0618	0.764269	0.972449	0.791451	0.981093	1.11271	0.948312	0.859976	0.933257	0.90492	1.10817	0.919279	1.1073	1.09892	0.874286	1.30334	0.879976	0.877715	0.915757	1.25346	0.923692	1.01639	1.53909	0.959856	1.01411	1.22923	1.03228	0.857737	1.37333	0.87181	1.02678	0.861857	1.02785	0.873486	0.818098	0.97865	1.21483	0.669177	1.13683	0.740752	1.00448	1.14368	1.0027	0.71125	0.935031
286	chr1	178617152	179183920	0.966781	1.37253	1.04055	1.10692	0.781478	0.893566	0.949003	1.13371	1.11757	1.05256	0.770556	1.21125	1.25635	0.945126	0.889851	1.18689	0.721972	0.867129	1.08128	0.999349	1.098	1.0752	1.28938	1.23086	1.01015	0.845679	0.966476	0.936619	1.01231	1.14502	0.75034	1.16505	0.978527	1.07046	0.836032	0.855029	0.898527	1.39809	0.691405	0.960673	0.963525	0.974516	1.22943	0.906045	1.1118	1.17017
287	chr1	179183921	179801512	0.958273	1.10254	0.984777	0.897051	0.835744	1.16663	1.07613	1.14922	1.06206	1.18412	0.81819	1.3876	1.20318	1.02153	0.89264	1.1305	1.14743	1.0722	1.07516	1.14179	1.13244	1.15603	1.8481	1.51026	0.8071	0.784993	1.22735	1.32259	0.965323	1.34457	0.795004	1.28387	1.17121	1.10583	0.867374	1.01126	0.882136	1.22802	0.950012	0.976704	0.792413	1.18555	1.22505	0.824208	1.02148	1.229
288	chr1	179801513	180363739	0.947534	1.10674	1.01898	0.725433	0.922736	1.38739	1.00547	0.920406	1.03129	1.23809	0.862919	1.18431	0.79743	0.913436	0.759814	0.962562	0.817089	0.95227	0.827265	1.10209	1.14718	0.999365	1.61783	1.35131	1.19135	0.952451	1.1321	0.962573	0.840233	1.03943	0.777462	1.06025	1.1695	1.05808	0.979839	0.77171	0.832572	1.09702	0.79678	0.990161	0.488994	0.850745	0.886097	0.89377	1.11704	1.32064
289	chr1	180363740	180944217	0.764519	0.985616	0.99281	0.917025	1.0343	1.6935	1.01778	1.16233	0.711758	1.08146	1.02004	1.05955	1.0642	0.768941	0.700019	0.964537	1.08726	0.854894	1.12858	0.982325	0.943354	0.901298	1.31006	1.28894	0.840353	1.32707	1.2577	1.04476	1.0101	0.937197	0.892762	1.09241	0.868157	1.05669	0.783602	0.737739	1.06822	1.01021	0.722013	0.960826	0.358787	0.945269	0.994043	1.08605	0.692647	1.09376
290	chr1	180944218	181474886	0.993467	1.17418	0.954457	0.905905	0.989308	1.13322	1.0861	1.11137	1.00354	1.45541	0.734059	1.19308	0.917176	0.903927	0.71757	1.08393	0.72538	0.991088	1.03681	0.643651	1.06622	1.39115	1.15913	1.41374	1.22979	1.07645	1.08585	1.19997	0.903746	1.1467	0.774838	0.991128	0.941078	1.02397	1.17925	0.652234	1.1748	0.983885	0.851506	1.05614	0.458622	0.926615	0.936865	1.07211	0.96721	1.11898
291	chr1	181474887	182029950	0.904041	1.12443	1.22544	0.905129	1.03153	0.820318	1.16996	1.196	0.864123	1.58554	0.795384	0.669217	1.23192	1.02679	0.845438	0.888487	0.69709	1.02687	0.931635	0.739497	1.11272	1.03512	1.14261	1.35305	0.895771	0.910463	1.11472	0.90833	1.28797	1.42978	0.827428	1.18708	0.985492	1.17425	1.04211	0.678401	0.71516	1.29496	1.19678	0.897312	0.820126	0.921777	0.901762	0.946236	1.17362	1.16778
292	chr1	182029951	182594508	1.07704	1.14648	0.771722	0.83711	0.942842	1.31301	0.963484	0.966478	0.716757	1.45876	1.00836	0.959933	0.855881	0.915595	0.791484	1.00027	0.75636	1.12874	1.2597	0.875919	1.18064	0.615161	1.02877	1.38561	1.0514	0.99554	1.04558	1.03586	0.981413	1.28813	0.866521	1.17636	0.777554	1.07182	0.984873	0.861246	0.966942	1.22455	0.854876	0.96696	0.671497	0.834469	1.15867	1.25994	1.25512	1.05763
293	chr1	182594509	183145444	0.801872	1.20286	1.0376	0.832318	1.2439	1.04685	1.11352	1.09283	1.03631	1.18461	0.837777	0.785444	1.32022	1.00035	0.713277	1.0172	0.905401	1.09767	1.00489	0.986014	1.13503	0.832967	1.20824	1.18628	1.13152	1.19154	1.05548	1.09012	1.06323	1.14895	0.993005	0.872899	1.06634	1.03593	1.13543	0.725419	0.738603	1.22351	1.16464	0.890913	0.957846	0.949901	1.01001	1.131	1.15012	1.21946
294	chr1	183145445	183703833	1.03342	0.873236	1.01964	0.907606	1.03359	1.08848	0.980306	1.32958	0.98394	1.14328	0.967268	0.968175	0.991796	0.898766	0.951021	1.08162	0.805962	0.946259	1.14823	1.3675	1.26991	1.07259	1.12627	1.49546	0.990674	1.11027	1.23569	1.26567	1.18105	1.05628	0.734776	1.11178	0.755021	1.09334	0.94113	0.955031	0.586725	1.33485	0.813216	1.02647	1.28532	0.738123	1.10116	0.851581	1.15702	1.19314
295	chr1	183703834	184230504	0.970229	0.925172	0.936238	0.687416	0.812805	1.07061	1.00244	0.761891	0.968323	1.22666	0.714823	1.23285	1.0495	1.21064	0.819025	0.973092	0.813945	0.975123	1.18503	1.08456	1.25866	1.17918	1.04298	1.58369	0.98067	1.3265	1.12328	1.14526	1.42037	1.13507	0.842787	1.13269	0.888033	1.10493	0.928489	0.923859	0.638765	1.08334	1.04364	0.978851	1.17292	1.1723	1.2118	1.24091	0.747213	0.940748
296	chr1	184230505	184775642	1.03937	0.816939	0.928505	0.798844	0.847143	1.23796	1.02065	1.03362	1.42424	1.23027	0.826907	1.13828	1.09675	1.30925	0.971774	1.03715	1.22279	1.08777	1.12626	0.90205	1.04286	0.80129	1.36221	1.35233	1.20049	1.08214	0.871886	0.911653	1.22322	1.02203	0.887638	0.815138	1.3118	1.12865	0.927915	0.791611	0.675547	1.32465	0.688405	0.895047	1.6296	1.1361	1.36911	1.25342	1.11347	0.861747
297	chr1	184775643	185364729	1.04616	0.943392	1.05156	0.984918	0.88913	1.01172	0.891778	1.24877	0.828714	1.28605	0.899528	1.28033	0.979522	1.35499	1.14554	0.977726	1.17998	1.14756	1.03942	0.896302	1.10727	0.92993	1.46505	1.44826	1.15671	1.06017	1.04056	0.852049	1.1079	1.31362	0.945473	1.3317	1.15629	0.92729	1.00207	0.981384	0.428807	1.26529	1.0226	0.760198	1.35393	0.936839	1.10268	0.987786	0.721662	0.918283
298	chr1	185364730	185958867	1.00092	1.25669	0.718953	0.983513	1.02131	1.06844	0.871264	1.24	0.933281	1.33102	1.02268	0.917959	0.940417	1.35825	1.41669	1.01634	1.55012	1.07329	0.928274	1.0835	1.12996	1.10908	1.30886	1.67323	0.997233	1.33736	1.11957	0.751413	0.954876	1.06315	0.899014	0.892887	1.44416	1.00239	1.09004	1.04231	1.33368	1.30765	0.622692	0.886398	1.24067	0.857106	1.02538	0.869552	1.20479	1.09468
299	chr1	185958868	186547492	0.806513	1.32905	1.19782	1.00386	0.840072	1.06456	1.10107	0.912039	1.09164	1.24856	1.10123	1.0893	0.746634	1.25263	0.966217	0.959749	1.14901	1.01386	1.02134	1.03812	0.978447	0.867638	1.23858	1.38596	0.9517	0.925852	1.07629	0.812095	1.00711	1.14777	0.891395	1.19756	0.599024	0.86278	0.740862	0.913157	0.531729	1.03015	0.864399	1.12043	1.49593	0.956572	1.1005	1.1395	1.08553	0.909858
300	chr1	186547493	187181921	1.03257	1.20453	1.10564	0.758057	1.06747	1.2386	1.19659	1.25017	0.847479	1.07354	0.712528	1.19824	1.09375	1.01652	0.769191	1.10193	1.63192	0.966886	1.32307	1.04467	1.04273	1.1012	1.09322	1.18493	1.44106	1.40304	0.883449	1.22172	1.02078	1.2573	1.10544	1.03314	1.1729	1.00644	0.954692	0.921931	0.695035	1.13658	0.925508	0.889762	1.18373	1.23464	0.90577	1.19301	1.09868	1.0334
301	chr1	187181922	187838777	0.920424	1.05823	1.11125	0.881139	1.0952	1.14088	1.18227	1.22566	1.53267	1.09	0.831531	1.50157	1.02287	1.21717	0.910869	1.12121	1.7241	0.951239	0.796761	1.02304	1.16089	1.08179	1.05508	1.69435	0.784869	0.589896	1.19704	0.96449	1.08972	1.57647	1.161	0.973543	1.24564	1.0108	0.932332	1.05867	1.02988	1.05987	0.635604	1.17219	1.13442	1.21121	1.16329	0.960246	1.02851	1.20781
302	chr1	187838778	188522302	1.02227	1.10973	1.01602	0.929345	1.17483	1.02286	1.24033	1.36514	0.675306	1.13958	1.03514	1.43169	1.16104	1.2472	0.843047	1.02637	1.56734	0.853837	1.12112	0.927761	1.03935	1.27445	1.3684	1.6002	1.23487	0.936596	1.27719	0.801803	1.01896	1.09907	0.957369	0.870662	1.13804	1.22815	1.01507	1.13746	0.948008	1.4285	0.842572	1.24857	1.63355	0.988893	0.986356	0.864887	0.971856	1.05021
303	chr1	188522303	189249333	1.01341	1.41922	0.902036	0.890114	1.08977	1.46573	1.2049	1.26564	1.54016	1.23088	1.21401	1.26741	0.773869	1.12503	0.820109	0.932964	1.64845	0.957912	1.35462	0.928674	1.16357	0.812286	0.899982	1.2288	1.27764	0.937021	0.792504	1.29673	1.00978	0.907245	0.884654	1.09479	1.01193	1.01002	1.02611	1.20979	0.949193	1.52845	0.924491	1.21651	1.46261	1.03434	1.11178	1.02699	0.939224	1.21165
304	chr1	189249334	190011952	0.966953	1.24482	1.16247	0.958236	1.00887	1.74523	1.19769	1.19919	1.31908	1.24329	1.53876	1.19547	1.126	1.23108	1.02244	0.977253	1.82029	1.03589	0.940685	0.960776	1.24303	1.63458	1.15339	1.39752	1.06068	0.960494	1.21821	1.21672	1.14507	1.17862	0.972217	1.0925	1.72629	1.27111	1.03775	1.11762	1.32487	1.25992	0.994629	1.14119	1.33094	1.25081	0.999424	0.917979	0.729098	1.31016
305	chr1	190011953	190714328	0.809918	1.23472	0.849253	0.967811	1.29869	1.27674	1.20968	1.21223	0.848385	1.26388	1.30613	1.5558	1.14171	1.35383	0.814451	1.01121	1.82253	1.07155	1.30538	0.938522	1.19133	1.04864	1.30374	1.65566	1.31484	0.994579	0.890929	1.02289	1.06886	1.1511	0.853229	0.916182	1.02795	1.0957	0.946841	0.995985	1.20798	1.22913	0.857596	1.17815	1.09384	1.20057	1.09571	0.967814	0.925789	1.14958
306	chr1	190714329	191409719	1.09111	1.09931	0.860629	0.928166	1.25581	1.25758	1.0281	1.20639	1.19318	1.39304	1.33922	1.14485	0.990307	1.00284	0.85313	1.08474	1.66651	0.72673	1.46151	1.28866	1.27018	1.05092	1.45487	1.21308	1.01202	0.921376	1.21553	1.0855	0.970734	1.39777	0.811993	0.804481	1.13888	0.960891	1.12031	0.939365	1.6161	1.07536	1.00711	1.1196	0.534214	1.10947	1.11118	1.29716	0.675858	1.27206
307	chr1	191409720	192076189	0.848131	0.875793	0.906557	1.03685	1.16655	0.872684	1.06464	1.28093	1.43714	1.29612	1.31183	1.21945	1.05348	0.762805	0.844601	0.917337	1.99982	0.888462	1.35758	0.73839	1.20731	0.864781	1.54755	1.36267	0.894249	1.05935	0.964977	1.37752	1.28436	1.05675	0.829933	1.18897	1.49165	1.09195	1.09997	1.06175	2.03514	1.06368	1.18299	1.03311	0.455077	0.82922	0.951017	1.0031	0.803577	1.21731
308	chr1	192076190	192699909	0.945739	1.00888	0.843936	0.891547	0.963481	1.33587	1.08703	0.86683	1.36671	1.38657	1.09047	1.23937	0.993594	1.16802	1.18192	1.01315	1.67401	1.03533	0.912382	0.984763	1.22888	1.06462	1.27905	1.32568	1.26147	1.06725	0.934175	1.21838	1.12233	1.06296	1.10983	0.87574	1.09127	1.03903	0.767707	0.720831	1.10113	1.15929	0.906309	1.19873	0.700769	0.981158	0.791592	1.27723	1.07532	1.10334
309	chr1	192699910	193302245	0.987367	1.00484	1.10794	0.691136	1.17106	1.12693	1.06685	1.31925	1.02746	1.16282	0.944331	1.48123	0.906553	1.01979	1.01026	1.02004	1.8261	1.07764	1.12212	0.757778	1.05816	0.769018	1.22099	1.35554	1.40655	1.25806	1.12467	1.10107	1.02784	0.808435	0.748132	1.01596	1.16272	1.08087	0.823695	0.866866	1.39644	0.939771	0.632677	1.16721	0.595554	0.836903	0.909274	0.987856	0.90352	1.40171
310	chr1	193302246	193902297	0.824899	1.2846	1.15143	0.717067	1.06318	1.28409	1.24591	0.741571	0.86202	1.10872	1.40859	1.36656	1.06079	0.930237	0.864055	1.11008	1.68234	1.11801	1.0598	0.746993	1.08118	1.25523	1.32218	1.31606	0.976671	1.06712	1.02566	0.854303	0.98894	1.19607	0.952646	0.904304	1.0554	1.04636	1.00691	0.757752	1.09381	1.21199	0.808725	1.31738	1.27165	1.02042	0.970842	0.961647	0.803367	0.971859
311	chr1	193902298	194588139	0.7501	1.21474	0.880023	1.00235	1.05669	1.0944	1.11639	0.914795	0.838643	1.12096	1.16299	0.824261	0.782886	0.614632	0.770165	1.00551	1.48434	0.793944	1.13198	1.0608	0.996125	1.04925	1.1971	1.35119	0.86682	1.09959	0.910608	1.05259	1.0498	1.13006	0.867967	0.953289	1.38679	1.13443	0.928886	0.824352	1.78683	1.20411	0.908258	1.1027	1.09399	0.993271	1.23503	0.746987	0.90681	0.658128
312	chr1	194588140	195294570	1.09578	1.18974	0.944518	0.935718	1.06401	1.06484	1.09244	1.12214	1.19492	1.03926	1.24199	0.946988	0.877906	1.2894	0.841207	0.963581	1.7747	0.989798	1.13749	0.916618	1.10165	0.760479	1.14244	1.18856	1.07523	0.799737	1.06799	1.20812	1.26281	0.971903	1.05173	1.02604	1.05573	1.001	0.831755	0.762169	1.43321	1.38483	0.83775	0.94742	0.634739	1.11431	1.20384	1.13333	1.14567	1.20706
313	chr1	195294571	195971410	1.07957	0.934863	0.935422	0.857012	0.992797	0.877052	1.06179	0.933887	0.871763	1.20743	1.23338	1.11603	1.13079	1.26435	0.803199	1.11268	1.52781	1.24057	0.840055	0.855545	1.30194	1.16635	1.32583	1.39985	1.40075	0.707943	1.24667	1.04081	1.17102	1.10075	0.92781	1.09589	1.1166	1.04365	0.907257	0.714733	1.09062	1.10773	0.654756	0.9865	0.656669	1.04664	1.20114	1.40774	1.05142	1.0528
314	chr1	195971411	196608520	0.99265	0.896239	1.11807	0.746967	0.990665	1.5075	1.04271	1.0351	0.969404	1.27415	1.4392	1.05409	0.759231	0.881317	0.760667	0.96143	1.50307	0.996832	0.892716	1.02107	1.10351	1.10778	0.978708	1.35725	0.989556	1.26468	1.10238	1.19203	1.0815	0.886756	0.70295	0.912096	1.25512	1.00214	1.02479	0.826864	1.43281	1.39396	1.05742	1.46601	1.0186	0.959999	1.35683	1.19473	1.1785	0.793062
315	chr1	196608521	197238353	0.819616	0.921217	0.922631	1.03402	0.702854	1.08613	1.12454	1.16973	1.0593	1.24067	1.22464	0.932441	1.01183	1.09526	1.22832	1.08695	1.86938	0.713195	1.11126	0.795233	1.01154	1.06531	1.19221	1.13357	1.05648	0.973951	1.18652	1.09353	1.11152	0.94147	0.749946	0.963189	1.01666	1.05863	1.07576	0.889746	1.02009	1.16946	0.691806	1.3289	1.27256	0.808905	1.02543	0.904226	0.741054	0.916959
316	chr1	197238354	197896658	0.926429	1.16683	1.14984	1.18636	1.32727	0.976959	1.03499	1.06241	0.907074	1.21005	1.11305	1.26007	1.19303	1.61007	1.05878	1.02288	1.66222	1.11905	1.14213	0.980167	1.21897	1.22662	1.05827	1.17834	0.999353	1.16559	0.971311	1.15368	1.0783	0.990878	0.912981	1.05452	1.31905	1.00876	1.07988	0.947802	1.7201	1.25725	0.766901	0.905233	0.615106	0.977317	1.43164	0.52438	0.92832	1.2307
317	chr1	197896659	198484139	1.07205	1.38	1.03697	0.819546	1.16544	1.10413	0.97622	1.26253	1.09496	1.29903	1.25826	0.9912	1.09662	1.03145	0.858673	0.974785	1.19704	0.850053	1.23911	0.768913	1.1029	1.07077	1.21506	0.957157	0.977506	0.738737	1.15756	0.897459	0.87964	1.14475	1.0751	1.02168	0.742346	1.05636	0.828492	0.955764	0.825443	0.9169	0.946871	1.06925	0.348964	0.724145	0.796354	1.33529	0.656939	1.68393
318	chr1	198484140	199063095	0.883105	0.83393	1.16696	0.879291	1.13412	0.839227	0.73003	0.936607	1.07637	1.12099	1.14807	0.967708	0.923567	0.751662	0.582543	0.999571	1.54081	0.896027	1.08507	0.864197	1.08324	1.05098	1.40214	1.16465	0.938299	1.10945	0.916181	0.818725	1.04657	1.05215	0.91098	0.903159	0.932508	1.16069	0.897146	0.816146	1.18015	0.893429	0.7344	1.19478	0.344852	0.915513	1.05802	1.24606	0.975496	1.76623
319	chr1	199063096	199678538	0.884928	1.14362	1.27071	0.894029	0.769271	1.20257	0.891076	1.29051	1.3194	1.43579	0.994689	0.857466	0.855991	1.30054	0.790581	1.04578	1.20935	1.05276	1.0916	1.09377	1.31094	1.10767	1.26233	1.37531	1.38346	0.714816	0.851269	1.22114	0.927839	1.087	1.08157	0.755078	1.12358	1.11411	0.998011	0.913316	1.22914	1.26095	1.01064	0.995468	0.60038	0.833839	1.12796	1.69292	1.10011	1.0411
320	chr1	199678539	200252753	0.882029	1.18981	1.00621	0.957758	1.27087	1.11656	0.813018	1.04756	0.82952	1.34609	0.909592	0.949803	0.968914	1.04314	0.922099	1.08092	1.05812	0.856501	1.3965	0.661463	1.16307	0.924091	1.15481	1.66063	0.748	1.03129	0.815382	0.73422	1.0737	0.819319	1.26945	1.08643	0.886705	0.883645	0.860405	0.780414	0.938503	1.12091	0.856246	1.01481	0.898184	1.04811	1.0421	1.33343	1.03929	1.36515
321	chr1	200252754	200829650	1.06823	1.14143	0.91342	1.14567	1.02143	0.981429	0.700568	1.04759	1.20544	1.20437	0.95295	0.742045	0.966273	0.770463	0.937364	0.985474	1.08034	0.855556	1.26391	0.489749	1.1692	1.30823	1.19464	1.16447	0.747184	1.04808	1.2436	0.920239	0.778569	1.05049	1.00757	1.16092	0.764096	1.04951	0.861347	0.826667	1.3382	0.937274	0.788141	0.658506	1.41299	0.969465	0.94519	0.837607	0.692535	1.07516
322	chr1	200829651	201330821	0.867369	1.06631	1.01597	0.984672	1.2762	1.22648	0.801351	0.819682	0.914786	1.3943	1.23694	0.857835	0.932302	1.04437	0.587537	1.11704	0.599161	0.959281	0.775976	0.907195	1.27343	0.684738	1.1119	1.37373	0.775696	1.151	1.00049	0.948877	1.27903	1.19099	0.963761	1.07749	1.1702	1.14035	1.10621	0.781724	1.053	1.22365	1.19931	1.04344	1.60992	1.00699	0.699309	1.08804	0.84412	1.32628
323	chr1	201330822	201843451	1.19705	1.03192	1.0997	1.27314	0.758399	1.46744	0.861821	1.17137	0.809719	1.10496	1.02296	1.27942	0.869725	0.975946	0.95123	1.02891	0.788773	1.33945	1.29881	1.34922	1.20823	1.09367	1.43079	1.71348	0.942736	1.08057	0.949709	0.996731	1.04397	1.13598	0.981487	1.13351	1.29183	1.13524	1.00712	0.985799	1.36828	1.08156	1.20549	1.07142	1.80223	1.04857	0.620647	1.00135	1.28078	1.26371
324	chr1	201843452	202398637	0.979203	1.25558	0.858076	0.883504	0.943292	1.61675	0.899612	1.20981	0.870922	1.23746	1.28098	1.01892	1.14561	1.02547	0.671244	1.04201	0.996685	0.957187	0.947475	0.887407	1.05424	1.33474	1.14864	1.32101	0.707128	0.687438	0.946718	0.993554	1.24527	1.05632	1.24509	0.835033	0.73988	1.00603	1.12932	0.797822	1.61463	1.24935	1.10674	1.06906	1.68258	0.902941	1.26612	0.574104	1.23139	1.1716
325	chr1	202398638	202930496	1.13947	1.01323	0.930736	0.98783	0.908942	1.1693	0.899658	1.01986	1.08478	1.1234	0.821735	0.96388	1.07827	1.16846	0.669529	1.06943	1.17214	0.84512	0.886008	0.937813	1.06563	1.19535	1.36449	1.22229	0.774828	1.03208	1.07368	0.868663	1.09367	0.77628	1.11586	0.887918	0.867022	0.997885	0.95936	0.849339	1.42352	1.09598	1.13759	0.873342	1.37978	0.907891	1.42753	0.909139	0.688904	1.36785
326	chr1	202930497	203442514	0.955214	1.16774	1.1727	1.0281	1.08718	1.4268	0.981918	1.20154	0.997875	1.29969	0.757934	0.827943	0.913254	0.965203	0.48379	0.984517	1.31597	0.799313	1.11737	1.08971	1.28689	1.05817	1.27593	1.19745	0.975218	0.5675	0.977025	0.824781	1.07028	0.825043	0.846491	0.779342	1.00119	1.08694	0.837714	0.998689	1.35921	0.985533	1.377	1.19986	1.34025	0.946572	0.959598	1.08508	1.04569	1.06609
327	chr1	203442515	203995279	0.971517	1.11443	1.20228	1.09952	0.907083	0.976853	0.570146	1.06393	1.1939	1.11796	1.20154	0.85734	0.876107	0.70069	0.6611	1.12814	1.03125	1.01939	0.99177	0.962732	1.18915	1.41391	1.53832	1.38697	0.903104	0.741127	0.697976	0.786695	1.21934	0.784111	0.883545	1.15684	1.14997	0.900797	1.06899	0.816895	1.11252	0.852479	1.33444	0.98835	1.48602	0.907226	0.816931	1.09046	0.946359	1.04947
328	chr1	203995280	204509755	0.775334	1.07892	1.17021	0.804435	0.841087	1.39914	0.797662	0.963418	1.09056	0.969172	0.937138	1.07193	1.32501	1.15416	0.481776	1.14552	1.12951	0.881236	1.05159	0.866399	1.20669	1.36216	1.3899	1.36536	0.989264	1.51327	0.799303	1.0532	1.11576	0.792269	0.901012	0.894667	0.952909	1.01965	1.01228	0.885748	1.38822	1.17994	1.22463	0.904088	1.47203	0.902572	0.939773	1.16981	0.983146	1.17795
329	chr1	204509756	205005865	0.943263	1.06731	0.924154	1.33057	0.747892	1.40326	0.771836	1.12358	1.20736	1.38445	1.13982	0.857956	0.911531	0.940787	0.833878	1.03787	1.06989	0.99922	1.01385	0.954583	1.19361	0.698765	1.59465	1.2569	0.856711	1.06508	0.949349	0.651372	1.11655	0.888484	0.824248	1.24072	1.41842	1.03988	1.00703	0.775447	1.21677	0.995669	1.34817	1.19915	1.52088	0.8571	0.9037	1.12136	1.1934	1.34337
330	chr1	205005866	205530310	1.15326	1.01425	1.06899	1.33657	0.931151	0.917185	0.837613	1.133	0.803474	0.929782	0.946331	0.85546	0.923519	0.860812	0.57521	0.964613	1.1847	0.850329	0.926811	0.771711	1.06994	0.889727	1.00301	1.28978	0.683563	1.19814	0.975165	0.794643	0.787199	0.850547	0.732216	0.789769	1.25707	1.09013	0.964006	0.76142	1.09969	1.07667	1.08212	0.878001	0.713802	0.852552	0.956426	1.10939	0.857289	1.09833
331	chr1	205530311	206167745	0.945658	1.16734	1.2331	1.22993	1.10699	1.08329	0.852032	0.842967	1.03534	1.08289	1.21764	0.980346	0.890398	1.08748	0.577135	0.942922	1.00534	0.994052	0.762497	1.20419	1.09273	1.17875	1.02211	1.36775	1.04434	0.623027	1.31229	1.10861	1.01783	1.37812	0.768149	1.11449	0.934248	1.21052	0.932265	0.799407	0.862935	1.19363	1.09151	1.19706	0.967406	1.08146	1.1014	1.26111	0.914694	1.16051
332	chr1	206167746	206732803	1.07609	1.07431	1.53674	1.03856	1.22144	0.969227	0.873045	0.947937	0.855096	1.30263	1.38722	1.06195	1.03291	0.741015	0.456998	1.14811	0.686555	1.03607	1.15636	1.20229	1.08791	1.27106	0.808154	1.12698	1.29972	1.11802	0.948707	1.0698	1.05242	1.43009	0.614893	0.875912	0.98368	1.15584	1.10202	0.807021	1.23328	0.857448	1.31395	0.794388	1.57346	0.854031	0.58255	0.66258	1.40395	0.986731
333	chr1	206732804	207232712	1.05739	1.28564	1.12951	1.13639	0.996726	1.25476	0.951926	0.826104	0.639051	1.32187	1.29795	1.06205	1.17823	0.859299	0.588263	0.971126	0.852748	1.00594	0.975917	1.01457	1.21398	0.632459	0.919739	1.65955	0.927297	1.19649	1.03354	1.25594	1.13367	1.47265	0.66725	1.09739	0.796976	1.09062	1.16627	0.936471	1.24545	1.22973	1.25402	1.17363	2.12169	0.99409	0.786648	0.949679	0.842385	1.09099
334	chr1	207232713	207811117	1.01097	1.14729	1.03761	1.04297	1.12028	1.37869	0.751258	0.940418	0.865844	1.27607	1.06365	0.898095	1.27868	1.04824	0.565327	0.973848	0.574813	0.896881	0.63259	0.952506	1.25317	0.952943	0.974368	1.38912	1.16318	1.19268	0.947768	0.868403	1.13262	1.51479	0.691399	1.12076	0.899607	1.0766	0.884476	0.801113	1.49776	1.17714	1.29047	1.0505	0.644879	1.01938	1.08207	0.770168	0.934539	1.39839
335	chr1	207811118	208345901	1.10713	1.07767	1.26314	0.654496	0.898556	1.04534	0.801623	1.08183	0.969354	1.27632	1.17878	1.00562	1.20228	0.974463	0.910259	0.953411	0.43946	0.855897	0.835871	1.17019	1.28891	1.23112	1.08844	1.15912	0.918552	1.35971	1.06113	1.08602	1.12363	1.04556	0.65845	0.962872	1.41723	1.16365	1.23282	0.923581	1.54461	1.16382	0.983422	0.894779	0.890984	1.07959	1.03401	1.02614	0.886484	1.20978
336	chr1	208345902	208887442	1.00624	1.11619	1.13683	0.733502	0.821409	1.19392	0.968741	1.53649	0.762704	1.53187	1.15666	1.00685	0.876075	1.05295	0.531988	1.01535	0.460386	1.0875	1.17536	1.16152	1.10272	1.04924	1.0858	1.15471	0.897466	1.24283	1.29147	1.04281	1.44894	1.05662	0.957891	1.07004	1.28041	1.0733	1.00286	0.896748	1.42284	1.15564	1.0756	1.23565	0.832607	1.10937	1.25179	1.00067	1.04405	1.23169
337	chr1	208887443	209469269	1.14757	1.21648	0.989989	1.19131	0.811018	0.88661	0.9078	1.22205	0.93166	1.52561	1.23688	0.766473	1.10292	1.12329	0.831798	1.02457	0.745253	1.11689	1.14407	1.24677	1.25229	0.747263	1.14678	1.24369	0.909071	1.28097	1.19445	0.909725	1.2946	1.01694	0.869915	1.0328	1.43327	1.26967	1.11243	1.12442	0.932758	1.28945	1.27447	1.01288	0.614288	1.05552	0.801712	1.0564	0.875676	1.22455
338	chr1	209469270	209972310	1.10222	1.29262	1.03732	1.10956	1.38178	0.953871	0.891679	1.07787	0.900672	1.65633	1.16409	1.04273	1.06774	1.01306	0.663513	1.05835	0.8449	0.913554	0.892392	0.977537	1.04952	0.447477	1.0768	1.27683	1.0228	1.28275	1.18381	0.935033	1.05563	1.18045	0.855748	1.26783	1.76381	1.13911	1.0914	0.976752	1.16492	1.0982	1.52464	1.14484	1.51232	0.943542	0.762195	1.22347	1.07384	1.37803
339	chr1	209972311	210569208	0.88226	1.22652	0.958024	1.20949	0.859923	1.22425	0.852608	1.02938	0.890165	1.39702	0.948854	0.647997	0.962474	1.05963	0.617512	0.910629	0.584027	0.7256	1.07213	1.05574	1.25337	0.642592	0.665416	1.10283	0.840109	1.24576	1.00411	0.718332	1.05225	1.28553	0.822379	0.952656	1.3656	1.11918	0.918635	0.891248	1.10286	1.0101	1.43929	0.924996	1.33764	0.973461	0.873177	1.17946	0.911536	1.32326
340	chr1	210569209	211113375	1.20377	1.08442	1.32688	1.08856	0.971733	0.761745	1.05925	0.879639	1.26216	1.67728	1.18042	1.11058	1.21414	1.21037	0.851591	1.06928	0.748969	0.783199	1.02342	0.975108	1.06577	1.24416	1.06542	1.5455	0.981332	0.914128	0.924589	1.12702	1.16743	1.06382	0.991046	0.957729	1.34815	1.12839	1.45421	0.9492	1.01175	1.12022	1.3437	1.26187	0.72183	1.00926	1.06891	1.22768	1.35536	1.41707
341	chr1	211113376	211737059	1.14087	1.17218	1.28771	1.29186	1.07505	0.941607	0.995223	1.16882	1.55501	1.28072	0.911351	1.04108	0.912776	1.06036	0.851245	0.966108	0.753532	0.87453	1.03909	1.0439	1.08749	0.976743	1.15053	1.12358	1.05862	1.57864	0.697755	1.19354	1.10596	0.890769	0.964906	0.809644	1.25621	1.13825	1.04307	0.814692	0.86258	0.833658	1.12282	1.29239	0.686423	0.969642	1.10853	0.820262	1.04997	1.44745
342	chr1	211737060	212295514	0.921488	1.01797	1.05385	1.14445	0.792973	1.39503	0.814836	1.1758	0.830595	1.18251	1.06319	0.908656	1.0274	1.00424	0.543603	1.04321	0.798975	0.841792	1.12017	0.856537	1.19686	0.953756	0.986583	1.29192	0.973955	1.01354	1.0676	0.979019	1.10571	1.00226	0.932861	0.986951	1.23742	1.10485	1.1759	1.00542	1.14174	1.31502	1.21054	1.17767	1.20422	0.874405	1.00429	1.0456	1.12514	1.08237
343	chr1	212295515	212843078	1.00087	0.878369	0.976064	1.03625	0.839791	1.31731	0.703969	1.00607	1.15187	1.16218	1.08905	0.841223	0.830217	0.938799	0.705018	1.09561	0.557523	1.00752	0.956804	1.24008	1.12858	0.593445	1.08825	1.205	0.991661	1.25168	1.04254	1.48796	1.1468	1.04184	0.925457	0.784835	1.20972	1.01991	0.951612	0.886604	0.77377	0.880885	1.39157	0.986873	1.35569	0.837566	0.977487	1.56474	0.866526	1.28112
344	chr1	212843079	213453370	0.920997	0.986407	0.976111	1.13046	0.845047	1.49584	0.844734	1.2494	1.03663	1.17744	1.15772	1.07197	1.16439	1.0366	0.762055	0.832935	0.984447	0.882082	0.963904	1.09063	1.17786	1.03692	1.13239	1.16617	1.20348	1.14239	1.17882	1.08839	1.14985	1.144	1.0756	1.10288	1.10711	1.17902	1.17954	1.01112	0.963243	1.06385	1.24786	1.01529	1.38558	1.26725	0.983379	1.06685	0.829491	1.16333
345	chr1	213453371	213977040	0.855728	1.09435	1.05733	1.13078	0.971743	1.05374	0.944393	0.954646	1.36266	1.28356	1.19042	0.618759	0.782507	1.26739	0.670626	1.00592	0.762124	1.14553	0.963798	1.16676	1.09641	1.07827	1.24904	1.69858	1.02948	1.42882	0.818908	1.39466	0.999873	1.36368	0.996183	1.07182	1.0972	1.04533	1.08452	0.985135	0.942626	1.09173	1.42339	1.07608	1.55294	1.04302	0.967896	1.16373	1.01761	0.809592
346	chr1	213977041	214535485	0.93656	1.06891	1.34165	0.789489	1.02466	0.888071	0.99944	1.27708	1.09265	1.39674	1.06261	0.851463	0.989554	1.15305	0.631413	0.950626	0.985576	0.932604	1.04473	0.787682	1.08305	1.10783	1.04427	1.39729	0.630719	1.14555	0.9967	1.21409	0.987661	1.0994	0.913783	0.944563	1.39998	1.06965	0.842246	0.917255	0.986718	1.03634	1.21751	1.1672	1.73949	1.22464	1.0585	0.670681	1.28651	1.24378
347	chr1	214535486	215089277	1.07639	1.07412	1.44965	0.58743	1.03745	0.800977	0.970123	1.33656	0.919687	1.24695	1.16415	0.979166	0.87303	0.980739	0.477066	1.02231	0.90402	1.00129	1.06975	0.725701	1.03836	0.924979	0.859752	1.23094	0.907222	1.26405	1.03439	1.3332	1.00486	1.07311	0.994532	0.989578	1.37531	0.853132	0.97556	0.765569	0.901467	1.06139	1.18587	0.949014	1.22744	1.07658	1.05153	1.1265	1.06541	1.08561
348	chr1	215089278	215681761	1.05559	1.27428	1.32978	1.01877	0.876535	0.983309	1.03445	1.29645	1.21455	1.39979	1.04879	0.680665	0.625345	1.03336	0.544147	1.03194	0.837344	0.954375	1.10892	0.941962	1.06549	0.93848	0.797497	1.20531	1.17011	1.47604	0.872442	1.0291	0.937013	1.28784	0.811564	0.996033	0.905659	1.02461	0.957101	0.642527	0.891814	1.01123	1.37822	1.08899	1.45846	1.24677	0.932489	0.85969	1.10318	1.22061
349	chr1	215681762	216280180	1.02223	0.967455	1.27242	1.13127	0.988827	1.06952	1.35306	1.2393	1.45419	1.12476	1.34049	0.962572	0.964572	1.11089	0.585017	1.04673	1.10902	0.979133	1.17472	1.07865	1.15388	0.662478	0.97884	1.3361	0.893621	1.35814	1.01938	0.890365	1.20634	0.834853	1.0685	1.11859	1.3312	0.995866	1.02162	0.804988	0.858135	1.16157	1.19514	0.928799	1.46098	1.55029	1.13926	0.96307	0.93476	1.51684
350	chr1	216280181	216880564	0.941512	0.993453	1.49407	0.955147	1.06325	1.24702	1.19046	0.905773	1.04839	1.22526	1.34808	1.02609	1.02448	1.07403	0.567298	0.916809	0.937023	0.804383	0.930089	0.892332	1.24693	0.784162	1.34101	1.5532	1.16514	1.28729	1.08355	0.941142	1.03993	0.942362	1.04586	0.936987	1.01549	0.978346	1.05102	0.680447	0.744375	1.08742	1.67827	0.829388	1.03976	1.42413	0.929179	1.14819	1.25052	2.0025
351	chr1	216880565	217451991	0.924225	1.3046	1.25179	1.07295	1.0828	1.04246	0.778129	1.04798	1.02166	1.22591	1.1444	0.934153	0.968525	1.11549	0.701087	1.09696	1.1331	0.729865	1.01454	0.944896	1.06809	0.707567	1.13422	1.37867	1.10344	1.43111	1.05825	1.30073	1.12782	1.33369	1.16006	1.1936	0.908857	0.859162	0.887793	0.984987	0.940567	1.31289	1.1931	1.05385	1.61067	1.17043	1.08954	0.795927	1.29407	0.756536
352	chr1	217451992	218084258	1.01754	1.29883	1.35093	1.13499	1.12131	1.39284	0.986348	1.05051	1.13852	1.04	1.18161	0.897756	0.880713	1.009	0.704543	0.921366	1.07512	0.851861	1.19293	1.09041	1.22918	1.03831	1.44146	1.60477	1.19538	1.21103	1.15428	0.903919	1.07217	1.38377	0.860512	1.58138	1.17543	1.09585	0.982462	0.71886	1.25492	1.02522	1.30698	1.19537	1.17685	1.44314	1.34353	0.938981	1.03703	1.3508
353	chr1	218084259	218682061	1.05321	1.5314	1.48343	1.28985	0.866373	0.734755	0.812295	1.05146	1.24838	1.21687	1.47364	1.17467	1.22436	1.2595	0.74942	1.06781	0.855515	0.850791	1.07704	0.867856	1.24038	1.01238	1.29527	1.36249	1.29238	1.14297	0.868282	0.966272	1.10481	1.17445	1.0977	1.16856	0.741972	0.959787	1.12787	0.868796	1.31574	1.14898	1.34335	0.969156	1.67203	1.18758	1.20323	1.3175	0.733666	1.22679
354	chr1	218682062	219258094	1.23019	0.938185	1.27616	1.07153	0.836544	0.878361	0.943491	0.931504	0.720554	1.09893	0.91377	0.872111	0.840006	0.952683	0.843345	1.051	1.20617	0.884546	0.909945	0.89745	1.1532	1.0142	1.37884	1.26782	1.24001	0.980885	1.21246	0.914672	1.02941	1.31781	1.04749	0.96539	1.17388	1.04367	1.0885	0.65213	1.16747	1.27917	1.25909	0.933628	1.76806	1.22738	0.634362	0.889953	0.981317	1.66789
355	chr1	219258095	219833362	1.0384	0.989995	1.23538	0.930042	0.900602	0.997618	0.839359	1.17353	1.03208	1.14813	1.0628	1.07167	1.17983	1.25884	0.77403	1.02093	1.04407	0.73929	0.949054	0.94691	0.955156	0.955524	1.14582	1.32604	1.10011	1.06625	1.23548	1.1374	1.10406	1.35772	1.09116	1.00914	1.09994	0.960266	0.956118	0.82786	0.799796	1.01625	1.57359	0.873774	1.57404	1.33556	0.537817	1.0228	1.11865	1.41855
356	chr1	219833363	220447539	1.11916	1.16511	0.959271	1.39838	1.01952	1.25927	0.924715	1.04427	1.06751	1.13229	1.37424	0.884409	0.78621	0.995169	0.699011	1.2667	1.04146	0.807385	1.09695	0.959553	1.10743	0.982717	1.16861	1.27719	1.23117	1.12942	1.23063	0.898614	1.00544	1.1777	1.11519	1.15255	1.06425	0.980486	1.07822	1.01198	1.1429	1.1915	1.17545	1.11306	1.99959	1.30299	0.973207	1.07901	0.977998	1.54324
357	chr1	220447540	221025085	1.13954	1.16177	0.831386	1.2789	0.968674	0.969822	1.00136	1.64055	1.23643	1.20765	1.42062	1.47906	1.21624	1.1224	0.656543	1.13144	1.0853	0.852352	0.782412	1.12455	0.927575	0.90766	1.49841	1.54317	0.962535	1.49085	0.92281	1.23257	0.924843	0.923873	0.926892	1.04171	1.12674	1.028	1.00809	1.04772	1.63721	1.17608	1.4603	1.21072	1.06452	1.34264	1.05726	1.22196	1.18751	1.34048
358	chr1	221025086	221585829	0.990178	1.21823	1.02736	0.936038	1.02754	1.30756	0.825272	1.29436	0.885551	1.03714	1.28855	0.943981	0.947136	1.00284	0.668696	1.12882	0.779138	0.849176	1.0536	0.996536	0.904972	0.826947	1.63079	1.67779	1.13372	1.06775	1.06703	1.16555	1.06969	1.22504	0.754502	0.773263	0.871292	0.917397	0.810693	0.892879	1.16197	0.786976	1.30925	0.938904	1.6577	0.999112	1.22502	1.16216	0.964004	1.40098
359	chr1	221585830	222133484	1.05175	1.05627	0.67776	0.720683	0.868006	1.20241	0.871261	1.20989	0.926241	0.925441	1.2216	0.81587	1.09276	0.829456	0.659673	1.17663	0.695831	0.967524	0.983277	0.766184	0.911428	0.69285	1.46265	1.36265	1.06014	1.17771	0.83473	1.02956	1.09939	0.999903	0.899045	1.28078	0.822004	0.886533	0.947788	0.70612	0.97885	0.982291	1.07742	0.768995	1.35024	1.25296	1.3142	0.743557	1.06051	1.5259
360	chr1	222133485	222667122	1.17229	1.21192	0.997243	0.938831	1.3009	1.08955	0.76189	0.848654	0.927143	1.0024	0.992357	0.765941	0.826628	0.798028	0.68131	1.00707	0.535621	0.765053	0.925764	1.17115	1.05921	1.14824	1.59946	1.59283	1.21824	1.28011	0.864066	1.00415	0.893474	1.09777	0.97177	0.870952	1.20993	0.912668	0.982733	0.825025	1.05262	1.27236	1.2822	0.955079	1.60736	1.20644	1.06113	0.859606	0.986165	1.32226
361	chr1	222667123	223250402	0.870329	1.14578	0.811438	0.881473	0.980887	1.14216	0.866518	1.2628	0.799495	0.885715	1.15035	0.893235	1.01612	1.0353	0.737177	1.18509	0.897878	0.800779	1.22978	1.1629	0.989027	1.20477	1.31658	1.26252	1.17667	0.902421	0.81918	1.01957	1.19167	1.15661	0.890443	1.17362	0.642635	1.03981	0.971837	0.852397	1.0675	1.1936	1.22989	1.02269	1.15471	1.33117	0.954812	0.908742	0.612415	1.34149
362	chr1	223250403	223833477	1.0384	1.16597	0.866773	0.841605	1.14038	0.928522	0.568787	0.967926	0.802714	0.951474	1.10446	0.53996	1.24824	0.700476	0.802403	0.994391	0.901748	0.840444	1.06514	0.870504	0.993353	0.915855	1.24056	1.17509	0.743774	1.07539	0.905401	1.14555	1.27121	1.14925	0.896078	1.26203	1.26251	0.925128	0.972195	0.730479	0.634295	0.97787	1.30537	1.04137	0.818411	1.08972	1.31035	0.840855	1.03077	0.974724
363	chr1	223833478	224337984	1.0269	1.12643	0.9201	0.957747	0.991564	1.24804	0.708801	1.21612	1.44589	0.722631	1.27787	1.20333	1.00928	0.933364	0.818272	1.01057	0.925649	0.887522	1.10266	0.928396	0.849956	1.30707	1.33399	1.10539	1.19181	0.92731	0.863533	1.12741	0.963173	0.939032	0.800421	1.09426	0.900478	1.02577	0.876185	1.00585	1.2537	0.952702	1.184	1.0211	1.07397	0.931944	1.18574	0.999142	0.794005	0.93035
364	chr1	224337985	224889289	0.926369	0.854855	0.917962	0.982116	1.1788	1.66241	0.733797	1.18	1.05946	0.78016	1.05309	1.09391	1.05411	0.933482	0.614926	1.12341	0.923257	0.831673	0.965626	1.01926	0.897123	1.06525	1.24083	1.62141	1.05252	0.911634	0.917831	1.16981	0.885639	0.940453	0.951905	0.846781	1.54176	1.0737	0.885988	0.819619	1.09419	1.01773	1.11958	1.04088	0.61253	0.78175	0.878592	0.995344	0.951496	0.890903
365	chr1	224889290	225487471	1.04047	1.08436	1.111	1.0807	1.13121	1.18643	0.955858	1.14394	1.16531	0.911996	1.08505	0.640322	1.21997	1.08262	0.9525	1.01858	1.25121	0.769546	1.03936	1.15084	1.02422	1.67517	0.965577	1.14706	0.989217	1.27648	1.03997	1.10544	0.837796	1.29061	1.08822	0.98184	1.08599	1.05145	0.869596	0.802866	0.824148	1.16947	1.50744	1.23654	1.02036	0.859592	1.1891	1.42013	0.993954	0.998861
366	chr1	225487472	226048750	1.03626	1.29432	1.28217	1.02954	0.919131	1.07165	0.880339	1.00396	0.848451	0.982735	1.22714	0.994821	1.26603	0.852795	0.561551	0.978313	1.74206	0.970543	1.02029	0.779428	1.01185	1.15302	1.12965	1.09855	1.7462	1.20771	0.948973	1.16412	1.0508	1.06848	0.911193	0.973708	1.36037	1.01854	0.752567	0.891259	0.983926	0.973665	1.10497	1.0666	1.14728	0.966636	1.09032	0.743407	0.991002	0.839922
367	chr1	226048751	226609263	0.993858	1.09294	0.900704	0.801884	0.80282	1.81148	0.992482	1.04396	0.933795	0.953197	1.17049	1.18823	1.41913	0.869454	0.78253	1.16942	1.46943	0.98586	0.826306	1.06103	1.09423	1.3164	1.27107	1.02669	0.502559	0.946007	0.868163	1.07191	1.08241	0.97081	1.04235	1.22693	1.16661	1.06116	0.985461	0.870469	0.794035	1.30929	1.34133	0.904844	0.736376	1.56451	0.687093	1.12735	0.933264	1.00126
368	chr1	226609264	227114271	1.08199	1.16609	0.949745	1.14333	0.988534	1.45299	1.37687	1.12232	0.952193	0.825451	1.38964	1.08264	1.20291	1.06841	0.762472	1.09163	1.54571	0.806578	0.830653	0.877098	1.04969	1.55722	1.57215	1.16694	0.999714	1.27975	0.850417	0.781769	0.975217	0.854646	1.39316	0.656978	1.62676	1.06867	1.16443	0.802543	1.07903	0.940447	1.30115	1.10518	0.963366	1.43084	0.960439	0.560428	1.32045	0.88377
369	chr1	227114272	227724540	0.98536	1.17939	0.741095	0.778483	1.07765	1.25701	0.82846	1.1219	0.815195	0.780236	1.21223	1.29537	0.79266	1.09611	0.699157	1.0563	2.11328	0.852363	0.911436	0.958378	0.983584	1.44547	1.26382	1.4565	0.925474	1.71694	1.12524	1.14933	1.08937	1.16692	1.10388	1.14606	1.32289	1.09259	0.795466	0.758253	1.49997	1.24092	1.42499	0.959961	1.42001	1.4691	0.910067	0.992647	1.11368	0.701264
370	chr1	227724541	228300742	1.20794	1.10846	1.02028	0.864882	0.880694	1.34707	0.91141	0.883326	0.539891	0.885677	1.06514	0.981227	1.3642	1.02667	0.438235	0.865022	1.62749	0.900247	0.742189	0.925166	0.762253	1.3165	1.07812	1.20419	1.01344	1.02753	1.03611	0.930342	0.891449	1.01315	0.892813	1.13341	1.04355	1.1152	1.09646	0.730152	0.718283	0.836477	1.32851	0.956673	1.58122	1.30871	1.21315	1.04	1.23672	1.17214
371	chr1	228300743	228900282	1.15997	0.921276	1.35798	0.97434	0.744547	1.34545	0.438112	0.94903	1.11391	0.831046	1.0901	0.814773	1.03267	1.12733	0.408049	1.01212	1.08591	0.781335	1.18453	0.737566	0.875284	1.3063	1.26178	1.12869	0.928571	0.901396	0.812431	0.933386	1.13029	0.974882	1.0103	0.960754	0.563377	1.00864	1.01109	0.65518	1.06049	0.838143	1.54062	1.09168	1.05327	1.09576	0.711177	1.23125	1.10527	1.14232
372	chr1	228900283	229413963	0.968774	1.46876	1.15934	1.5058	0.969138	1.1553	0.585671	0.989146	0.849898	0.794934	1.11524	1.12331	0.923574	1.24493	0.659231	1.028	1.61666	1.03978	1.0252	0.909847	0.884635	1.70389	1.34136	0.978216	1.06803	1.36366	1.10277	1.27963	1.23495	1.02042	1.11069	0.994446	1.49207	1.06966	1.19646	0.944558	1.15769	1.32883	1.38526	0.848025	1.53363	1.22982	0.964809	0.699931	1.34934	1.03481
373	chr1	229413964	229979436	0.946716	1.28972	0.927115	1.38019	1.16796	1.15282	0.373618	0.99425	1.06018	1.05506	1.03877	1.14856	1.12899	0.984119	0.714097	0.943873	1.61297	0.757109	1.00623	0.837059	0.895202	1.36597	1.1482	1.46077	0.913338	1.35308	0.917076	1.08709	1.02949	0.887962	1.33071	0.759889	1.23977	1.08661	1.06927	0.99852	1.54719	1.18697	1.20948	1.06123	1.39517	1.02251	1.08917	0.989941	1.32555	0.737517
374	chr1	229979437	230498643	1.0945	1.11841	0.970022	1.08502	0.971725	1.67489	0.411528	1.00869	1.3226	1.07829	1.0825	0.796534	0.992038	1.02851	0.658408	0.982619	1.57662	0.901363	1.25994	1.06343	0.818668	1.3092	1.33195	1.04964	0.747934	1.14543	0.921579	1.17177	0.890438	1.09415	1.18767	1.09852	1.30961	1.05091	1.16906	0.917851	0.968573	1.23202	0.819644	1.02935	0.628107	0.901792	0.782422	1.05283	0.878294	1.35527
375	chr1	230498644	231022031	0.879617	1.07269	1.00465	1.59793	1.03576	1.3138	0.535854	1.09974	0.579724	0.948365	1.11781	0.614442	0.942235	0.901971	0.493694	0.869668	1.54493	0.815439	1.18421	0.909683	0.897664	0.850575	1.07116	1.09808	0.790626	1.53504	0.931992	1.08806	1.16871	1.03505	0.936285	1.0691	1.23676	1.03609	0.971207	0.921291	0.704295	1.06394	1.17881	0.912317	1.64647	1.23662	1.16537	0.858047	1.00552	1.04248
376	chr1	231022032	231580613	1.04703	0.942956	0.98161	1.26223	1.00319	1.15568	0.492508	1.29085	0.753464	0.820367	0.856354	0.765756	0.741319	1.05948	0.643669	1.0535	1.28442	0.944104	0.787564	0.873794	0.909788	0.877544	1.23855	1.3514	1.2151	1.1801	0.740203	1.04386	1.15138	0.981536	0.959308	1.06503	1.05066	1.03357	1.20349	0.889995	0.964307	1.17458	1.11812	0.798245	1.59586	1.26262	1.15975	1.26594	1.10364	0.873497
377	chr1	231580614	232134928	0.820121	1.08118	1.03449	0.851366	0.955713	1.11671	0.509828	1.2152	1.10155	0.722922	1.09859	1.03818	0.920401	1.04658	0.493523	0.946925	1.35764	0.90576	1.30195	0.754709	0.98264	1.19714	1.7622	1.0455	0.99	1.29044	1.1247	0.995597	0.976597	1.14733	1.12894	0.794843	0.947971	0.957452	0.803305	0.973989	0.843371	1.09584	0.89844	1.02201	0.956931	1.12564	1.06976	1.1206	0.945231	0.76073
378	chr1	232134929	232692731	1.37963	1.2679	1.317	1.40616	1.03431	1.20952	0.415036	1.19623	1.39109	0.731916	1.07115	0.886407	0.960515	1.13525	0.641766	0.92076	1.25281	0.858832	0.976432	1.1113	0.969213	0.848611	1.36697	1.23573	1.20182	1.20317	1.25412	1.12614	1.01833	1.16902	1.24573	1.05382	0.816952	0.969825	1.06516	0.967014	1.157	1.19877	1.10495	1.20386	1.93254	1.2318	1.08119	1.29339	1.23896	1.14006
379	chr1	232692732	233240245	1.08263	0.921061	1.39582	0.881257	1.21258	1.34989	0.825193	1.04517	0.985428	0.814526	1.2618	0.816689	0.784059	0.859902	0.665436	0.892398	1.41238	0.70797	1.15108	1.157	1.05545	0.72056	1.19462	1.10249	0.641224	1.17415	0.967579	1.03647	0.908908	1.15611	1.13128	1.07398	1.13201	1.00089	0.806909	1.0133	1.23204	1.06699	1.17386	0.878202	0.774647	1.00535	1.0279	0.851642	1.17163	1.47473
380	chr1	233240246	233825485	0.989776	1.11723	1.06207	1.06213	0.823158	1.51734	0.616683	1.14265	0.810062	0.769526	1.17669	1.0511	1.33377	1.08926	0.892217	0.993847	1.44318	0.8098	1.10483	0.978413	0.960999	0.811274	0.985572	1.25753	1.26101	1.11339	0.842253	1.14442	1.06262	1.21799	1.16003	0.947795	1.11477	1.1211	0.950577	0.778605	1.18453	1.05904	1.02366	1.24594	1.60154	1.35365	1.16314	1.14772	1.1663	1.42105
381	chr1	233825486	234420944	1.1407	1.23383	0.912889	1.11019	1.10604	1.2314	0.483115	1.44657	1.1449	0.947	1.47088	1.04347	1.06247	1.11198	0.764167	1.0127	1.1891	1.32841	1.2489	1.10446	1.05502	1.13457	1.15473	1.45203	1.15699	1.20569	0.93101	1.02722	1.22598	1.23348	1.2146	1.10653	1.54607	1.0981	1.06193	1.1062	0.907206	1.16493	1.6232	1.01057	1.88391	1.07912	1.144	0.825648	1.06041	0.940159
382	chr1	234420945	234928176	1.01179	1.24602	1.03196	1.06217	0.973559	1.37981	0.581566	1.12395	0.873802	0.703306	0.986428	1.26054	0.816798	1.01625	0.507066	1.08001	1.51765	0.796646	0.848093	1.06238	1.06099	0.786917	1.24598	1.55466	1.11797	1.27327	1.17584	1.27091	0.917819	1.10973	1.1736	1.17471	1.06411	1.05113	0.82107	0.968212	1.57458	1.03662	1.06385	0.779088	0.793313	0.975395	1.58426	0.939917	1.08635	1.54593
383	chr1	234928177	235499192	1.04075	1.08788	1.00706	1.11756	1.13809	1.56033	0.483226	1.23174	0.857806	0.783712	0.985579	1.01416	1.12623	1.15718	0.555856	1.09657	1.50414	0.921202	0.950227	0.967958	0.824082	0.752659	1.27433	1.07627	1.18165	1.15177	0.893734	1.18568	0.894477	1.10986	0.914939	0.901585	0.947752	1.06371	0.852518	1.0315	0.939699	0.963871	1.31092	1.09358	0.880546	1.05312	1.31923	1.1679	0.942613	1.06838
384	chr1	235499193	236083770	1.07466	1.05837	0.871201	0.673999	1.08743	1.32292	0.483814	0.861073	0.841671	0.831413	1.2161	1.32267	1.1178	0.935482	0.58546	1.05614	1.41722	0.990721	1.12105	0.936535	1.28499	0.762359	0.941653	1.29307	1.12331	0.963564	0.899709	1.06118	0.89472	1.10039	1.12052	0.98604	1.09748	0.99024	0.827307	0.795438	1.07198	0.928177	0.976667	0.802171	1.22776	1.10321	1.01728	1.03779	0.961234	0.940884
385	chr1	236083771	236652841	0.994149	1.25331	0.871146	0.919493	0.89703	0.901479	0.713015	0.982077	1.00134	0.8395	1.09928	0.799698	0.736016	1.14467	0.764588	1.02622	1.21798	0.806891	1.12521	0.734033	1.08519	1.02172	1.69622	1.25288	1.38064	0.985342	0.762888	1.03709	1.12746	0.790176	0.91265	0.976511	1.04236	1.13513	0.946606	0.885639	0.809707	1.04742	1.0311	0.984191	1.33467	1.11881	0.838834	0.973362	1.04302	1.14443
386	chr1	236652842	237249595	1.35311	0.940635	0.965288	1.1315	0.902328	0.963695	0.862954	1.01072	0.781423	1.09748	1.40171	0.88593	0.926423	1.20936	0.737447	1.10678	1.46431	0.955485	0.905085	1.16858	1.13562	0.947545	1.55472	1.52864	0.841676	1.29617	1.35454	1.16735	0.925839	0.989981	0.940707	0.986207	0.758917	1.13208	0.995348	1.12848	1.07501	1.16894	1.12836	1.11418	1.72471	1.38119	1.19231	1.1328	1.01702	1.47136
387	chr1	237249596	237888224	0.959637	1.18903	0.848931	1.03718	1.05653	1.38698	0.875537	1.51447	1.24509	1.03445	1.21514	1.11349	1.28143	1.09184	0.819126	1.00176	1.33671	0.858158	1.05855	1.00446	1.14301	1.07684	1.74939	1.38647	1.17861	1.29571	0.723303	1.2396	1.04744	0.997313	1.13122	1.12375	1.17626	1.10393	1.10917	0.794037	0.914458	0.94326	1.27124	0.986028	1.08236	1.28681	1.0394	1.01832	1.15917	1.53439
388	chr1	237888225	238479387	1.10552	1.38592	0.958001	1.04603	0.889213	1.21825	1.11164	1.09538	1.19391	1.05809	0.845241	0.822146	0.881111	0.961365	0.989612	0.985974	1.10898	0.728801	1.02392	1.32053	1.21843	1.07341	1.39277	1.42685	0.942478	0.94421	1.12096	1.18152	1.25765	1.12621	1.10241	1.03833	0.778591	1.08412	1.04697	0.867464	1.01587	1.17902	1.08267	1.13553	1.12729	1.1253	0.916212	1.16124	1.4045	1.34215
389	chr1	238479388	239131960	1.06372	0.958794	1.1033	0.914247	1.23321	1.02446	1.30346	0.924222	1.01208	1.262	0.850714	0.922584	0.825236	1.21688	1.02243	1.07298	1.42909	0.729294	1.09144	1.02609	1.10287	1.31186	1.45972	1.22974	1.26201	1.22275	1.01887	1.34101	1.21337	1.47011	1.00925	0.978715	1.105	1.1404	1.3272	0.969123	0.970012	1.39106	0.838945	0.962414	1.53497	1.14671	0.884511	1.14746	1.09988	1.36126
390	chr1	239131961	239729365	1.01624	1.04032	0.972603	0.816712	1.27969	1.26444	1.21122	1.10465	0.863927	1.16659	0.94638	1.1528	0.903658	1.05461	0.780438	0.92259	1.32936	0.590218	0.855904	0.929389	1.05951	1.04575	0.981685	1.29183	1.07862	1.07305	0.951882	1.03898	1.38385	1.08638	0.987083	1.07328	1.02339	1.16291	1.15418	0.84596	1.82412	1.14112	1.23982	1.20546	1.5778	1.21968	0.955486	1.36936	0.902875	1.24566
391	chr1	239729366	240310752	1.08237	0.902223	1.2396	0.984946	1.00637	1.05327	1.32803	0.84481	1.10724	1.19396	0.550399	1.04916	1.13975	1.14617	0.715324	1.03211	1.24702	0.752695	1.01272	1.2642	1.15763	0.990084	0.978162	1.27641	0.961955	1.00295	1.1161	0.983579	1.56589	1.2489	0.981972	0.995632	1.0329	1.00621	1.16618	0.887785	1.30141	1.40974	1.30304	1.15692	1.68251	1.17316	0.974791	0.934797	1.10989	1.0247
392	chr1	240310753	240866943	0.893401	1.02466	0.93746	0.97216	1.14816	1.15785	1.30139	1.20432	0.89898	1.31963	0.638298	0.944646	1.0483	0.945192	0.750807	1.04107	1.35521	0.97838	0.957925	0.934569	1.04932	0.850475	1.2497	1.43959	0.647922	1.24326	1.08248	0.885112	1.48531	1.23914	0.987758	1.01267	0.943101	0.917443	0.917668	0.91282	0.979631	0.847523	1.42182	1.1373	1.25439	1.36179	1.24132	1.28472	1.22756	1.08662
393	chr1	240866944	241452746	0.835976	1.02579	1.25973	1.14541	1.09582	1.04886	1.28641	0.950867	0.568567	1.3642	0.401576	0.724516	0.773346	0.676008	0.748629	1.02894	1.36311	0.959277	0.870935	1.09358	1.27012	1.00596	0.83378	1.25319	0.936659	1.25805	0.948883	1.31499	1.45471	1.22566	1.12314	0.825569	1.32414	1.18361	1.13832	0.943773	1.62727	1.13611	1.3365	0.933855	0.619363	1.15096	1.15962	0.812151	1.29583	1.12804
394	chr1	241452747	242061198	0.871598	0.99423	1.09296	1.13441	1.0563	1.15883	1.27714	0.915667	0.818499	1.29327	0.632321	0.865655	0.885032	0.769942	0.643103	1.04042	1.22531	0.965055	0.935365	0.734925	1.21335	1.04482	1.13945	1.49411	1.10607	1.12177	1.00639	1.15733	1.84858	1.35566	1.00242	0.924754	1.28449	1.03241	1.01464	0.779747	1.57621	0.984507	1.41473	1.13579	1.11764	1.32404	1.12701	1.00341	0.925559	1.18455
395	chr1	242061199	242635007	1.1317	1.05261	1.18178	1.32393	1.17264	1.18944	1.16841	1.16344	0.846212	1.21952	0.607794	0.65511	1.10446	0.902678	0.941244	1.14707	1.22047	1.04976	1.13466	1.14546	1.09768	1.05195	0.835316	1.06726	1.2276	1.23721	0.964692	1.08239	1.51546	1.30059	1.0792	1.10995	1.40375	1.12282	1.07625	0.928343	0.86971	0.900287	1.55294	1.2048	0.737992	1.24809	0.854252	1.04099	1.12966	1.40005
396	chr1	242635008	243217070	1.05672	1.22169	1.21833	1.10703	1.35056	1.27427	1.3993	1.38773	0.838128	1.21917	0.983784	0.748912	1.15913	0.870701	1.09282	1.05013	1.01891	1.19962	1.02136	0.946912	1.12354	1.09367	1.00057	1.21584	1.27476	1.79071	1.14317	0.978525	1.53984	1.28678	1.05761	1.07923	1.12445	1.11363	1.3899	1.19953	0.641823	1.16789	1.8594	1.08527	0.550771	1.40801	1.25484	0.656246	1.07413	1.05284
397	chr1	243217071	243791329	0.972167	1.07425	1.10599	1.43132	1.22636	1.39383	1.10617	1.3213	0.860098	1.28841	1.12562	0.946423	1.12556	1.08359	1.28015	1.0464	1.28865	0.986894	1.15017	0.892167	1.1665	1.08534	0.921613	1.32427	1.08311	1.13676	1.0219	1.11229	1.7637	1.06598	0.771955	0.965371	1.1273	1.1811	1.16889	0.931574	1.04515	1.23397	1.47071	1.13402	0.841857	1.21044	0.869646	1.12708	0.889885	0.978522
398	chr1	243791330	244337701	1.15257	1.19149	1.11402	0.921958	0.894799	1.58239	0.901541	1.01657	0.772047	1.2079	0.865101	1.10289	0.912551	1.25243	0.858889	0.985471	1.30541	0.96287	0.871294	0.93862	1.11904	0.739087	0.825096	1.05837	0.796106	1.31559	0.927949	0.856904	1.64022	1.06184	0.986106	0.866381	1.11829	1.11316	1.05545	0.973421	0.918995	1.10091	1.32282	1.06718	0.997411	1.22317	1.24236	1.02777	1.05623	1.00732
399	chr1	244337702	244909639	1.02473	0.917265	1.19844	0.957718	0.960167	1.74777	1.05281	1.16041	0.701233	1.14006	0.94386	1.03563	1.02236	0.771044	0.728334	0.989518	1.27719	1.10158	1.10202	0.992282	1.00375	1.00298	0.61426	0.983162	0.911481	1.17997	0.697042	0.959567	1.47265	1.15329	1.07808	1.17209	1.22216	1.15581	0.917184	1.1291	0.684839	0.867974	1.17217	0.913918	1.47124	1.16885	1.26738	1.03864	1.2615	1.114
400	chr1	244909640	245477991	0.976622	0.944787	1.06978	0.758138	0.810639	1.22287	0.921577	1.35482	0.940199	1.15292	0.669995	1.2182	1.2043	1.03682	0.582558	1.14099	1.52171	0.950329	0.81212	0.928712	1.15297	1.01302	0.592018	1.00315	1.22431	0.904813	1.17275	1.14472	1.72028	1.30089	1.13412	1.0485	1.36107	1.04417	0.96683	0.940225	0.777328	1.10462	1.24613	1.16626	1.00656	1.15361	1.24371	0.931518	1.17601	0.993868
401	chr1	245477992	246008178	1.11792	0.944193	1.07495	0.720981	0.687264	0.956748	1.23492	1.04515	0.744652	1.10417	0.977501	1.17848	1.02328	1.03432	0.597465	1.11151	1.27481	0.920666	0.83472	1.50458	0.999124	1.00416	1.01542	0.979712	1.22529	0.759527	0.984971	1.00231	1.50992	1.15973	0.923417	1.11284	1.32748	1.05234	1.01627	0.976847	0.897682	1.02686	1.32756	1.04318	1.03554	0.98839	1.52785	1.4751	0.689898	1.11716
402	chr1	246008179	246605588	1.18586	0.973297	0.867653	1.1458	0.802068	1.04813	1.02007	1.18101	1.00793	1.04448	0.891044	0.833028	0.965896	0.843498	0.82798	1.11322	1.33921	1.03938	1.32386	1.2776	1.12394	1.36302	1.15701	1.49058	1.09737	1.0318	0.98965	1.30925	1.42038	0.966629	0.912363	1.21807	1.11538	1.14044	1.05167	0.952729	0.943498	0.998116	1.53271	1.0144	0.919189	1.05927	1.26035	1.11687	1.07529	1.43979
403	chr1	246605589	247217124	1.00623	1.24921	1.1388	1.17994	1.01235	1.23715	1.07456	1.02246	0.844689	1.41888	0.974174	1.39838	0.674655	1.07409	0.676396	1.07536	1.3996	0.789168	0.903434	0.920513	1.19451	1.09802	1.27771	1.24105	0.955615	1.09227	1.23791	0.87218	1.52499	1.38094	1.32873	0.726494	1.07975	1.05058	0.842826	1.04411	0.852415	1.14921	1.14351	1.15575	1.32074	0.942507	0.961586	1.00787	1.16176	1.00842
404	chr1	247217125	247822196	0.965794	0.92954	1.07908	1.16081	1.00087	0.998451	1.06258	1.34015	0.914367	1.26979	0.912344	0.711143	0.876983	1.21013	0.61183	0.971931	1.4517	0.770711	0.96106	1.1659	1.00344	0.874007	1.11531	1.31212	1.30322	1.27356	1.09953	1.18701	1.43951	1.12403	0.893666	1.26546	1.42335	1.10065	1.15637	1.04967	0.671546	1.16273	1.59147	1.01552	1.26233	0.826129	0.942691	1.11896	1.33849	0.746269
405	chr1	247822197	248521468	1.2797	1.06866	1.06691	0.860353	1.18777	1.52321	0.92504	1.16091	1.43703	1.21107	0.866988	1.56635	0.908971	1.08877	0.795388	1.0973	1.43486	0.937923	1.29149	1.10067	1.13964	0.762436	0.773105	1.3601	1.06651	1.92988	1.01179	1.25912	1.30378	1.05776	1.04351	1.2086	1.11218	1.08947	0.960336	1.00236	0.698441	1.09942	1.26531	1.22714	0.739469	0.952136	1.09208	1.36197	1.18759	1.29357
406	chr1	248521469	249250621	1.23344	1.03055	1.00205	1.16973	1.02895	0.954362	1.34697	1.46685	0.918442	1.21309	0.818822	1.28624	0.922145	1.07984	0.69725	1.12699	1.54051	0.735822	0.959892	1.17292	1.2288	0.908828	0.963379	1.16131	1.03384	1.74231	0.900283	1.16264	1.8002	1.12972	1.15551	0.974163	1.08101	1.03639	1.06013	0.998572	1.31537	0.995342	1.7398	1.12017	1.67431	0.887361	0.776073	0.810741	1.26231	1.1537
407	chr2	1	612530	0.753385	0.738682	0.992278	0.907372	1.11213	0.457705	1.07003	1.05532	1.0605	0.915641	1.39915	1.04233	0.963886	1.28928	1.37563	1.23474	0.87271	0.773999	1.36457	0.82909	0.717953	1.1424	1.01274	0.727455	0.961789	1.07213	0.952374	1.04002	1.12435	1.11956	1.10914	0.759338	0.944174	0.935545	1.09492	0.658773	1.48243	0.611366	1.03693	1.09156	0.940818	0.783725	1.09622	0.946949	1.22451	1.30416
408	chr2	612531	1250706	0.971338	0.866197	1.0783	0.626263	1.00714	0.492123	0.666309	0.951041	0.957557	0.861279	1.15981	0.918129	1.02451	1.19019	0.901593	0.982161	1.21617	1.17847	0.835082	0.980894	0.726109	0.58344	0.74012	0.71085	1.29698	0.839678	1.02506	1.0906	0.972379	1.44438	1.2114	1.04367	0.717202	1.15204	1.05161	0.835175	1.23824	0.482414	1.12062	1.07676	0.76785	0.99702	1.01029	1.5833	1.2635	0.948346
409	chr2	1250707	1830041	0.794515	1.1371	0.876491	0.699286	1.05097	0.480184	0.7623	1.19055	0.881219	0.639639	1.2382	1.16455	0.680987	1.04008	0.771068	1.15223	0.999118	0.861364	0.948885	1.02099	0.854803	0.608169	0.970179	0.712334	1.41401	0.781899	1.06697	0.776815	1.17186	1.27821	1.10837	1.23571	0.623959	0.95524	1.04848	0.78266	1.46688	0.390406	1.03348	0.97714	0.935345	1.0256	0.819519	1.04402	0.974253	0.989277
410	chr2	1830042	2387486	0.763495	0.965173	1.10148	1.19508	1.12363	0.572043	0.51426	1.03672	1.04022	0.619036	1.47565	1.18766	0.996111	1.27685	0.926626	0.90567	1.07265	0.755289	1.16691	1.15355	0.772273	0.571321	1.01253	0.712172	1.24357	0.989584	1.03261	1.35848	1.02504	1.29625	1.04642	0.847136	1.05174	1.04999	1.19852	0.94602	1.48257	0.573069	0.777575	1.03597	0.925912	1.09591	0.917697	1.11048	1.20515	1.30368
411	chr2	2387487	2961455	0.872725	1.02918	1.16574	1.25522	1.15562	0.817998	0.933505	1.02967	1.06801	0.480009	1.30356	0.883473	1.29182	0.997346	1.14173	1.13612	1.23091	1.05565	1.17366	1.18343	0.885264	0.636294	1.08689	0.830102	1.01421	1.10049	0.835295	1.2995	1.08201	1.07803	1.10689	0.942294	1.11025	1.39887	1.196	0.8704	1.71535	0.703282	1.04582	0.878419	0.370252	1.15201	1.55338	1.37052	1.43275	1.07005
412	chr2	2961456	3587185	0.958725	0.966996	1.13868	0.907946	1.04416	0.717652	0.951475	1.00333	0.902512	0.537357	1.13665	0.528678	1.29548	0.792168	0.723633	0.979491	1.25622	1.12332	0.884387	0.916851	0.760258	1.09828	0.722799	0.735717	0.9542	0.859863	1.17688	0.895907	0.93811	1.26076	1.09951	1.03656	0.862363	1.08689	1.08784	0.668442	1.38771	0.427323	0.614335	0.840726	1.15945	1.17354	0.962437	0.78257	1.19025	1.03104
413	chr2	3587186	4161088	1.11028	0.662514	1.20168	1.08987	1.0634	0.759673	0.894898	0.961593	1.3425	0.754522	1.12143	0.878075	0.975183	0.882964	0.93462	1.00289	1.20718	1.10914	1.20492	1.05903	0.759485	1.30258	0.966083	0.914617	1.16652	1.12453	1.0319	1.30926	1.06154	1.18766	1.1904	1.18048	1.07682	0.98725	1.05485	0.679013	1.27514	0.466324	1.04176	1.11031	1.47283	1.28554	1.2044	1.3557	1.12416	0.899227
414	chr2	4161089	4792342	0.948719	0.977203	1.05127	1.09259	1.03355	0.953011	1.23315	0.912114	1.21781	0.649583	1.6728	0.983578	0.94284	1.03407	0.894017	1.01672	1.35483	1.31499	0.88831	0.757292	0.677126	0.937451	1.16125	1.05472	0.957048	0.863214	1.46569	0.995193	0.989114	1.31873	1.16572	1.07625	1.09785	1.01919	0.954224	0.928921	1.11725	0.7511	1.04771	1.31725	0.707411	1.31798	1.25294	1.341	1.13588	1.05772
415	chr2	4792343	5530792	0.99896	0.968182	0.948192	1.32094	0.898576	0.913693	1.48783	1.26583	1.12859	0.76704	1.39045	0.85924	1.2615	1.112	1.13874	0.974848	1.68814	1.15713	1.27257	0.995152	0.973496	1.00172	1.39278	0.825115	1.17995	0.925495	1.28389	1.18273	1.35198	1.29683	1.48206	1.00014	0.88637	1.14044	1.03129	0.858452	1.91868	0.511139	1.07639	1.14069	0.667631	1.26723	0.923782	1.06931	1.2959	1.30944
416	chr2	5530793	6119991	1.20459	0.997904	1.17853	1.36373	0.888471	0.941543	1.01177	1.03592	0.960511	0.740646	1.2382	1.00952	1.2938	1.03675	1.11261	1.02812	1.46674	0.963387	0.761409	1.05624	0.888683	1.06702	1.23519	0.845548	0.924926	0.546501	1.12586	1.05782	1.10352	1.06872	1.29141	1.11844	0.759265	1.34204	0.858235	0.95419	1.27552	0.614437	1.20021	1.16223	0.947726	1.1526	1.16644	1.02738	0.872207	1.08421
417	chr2	6119992	6723426	0.893513	1.10865	0.85274	1.25077	1.103	0.899364	1.32611	1.19385	0.96469	0.698219	1.3698	1.36436	0.948603	0.979527	0.982583	1.06921	1.56689	1.25752	1.04359	0.835327	0.725999	0.820979	1.24003	0.870863	1.05948	0.62143	0.981425	1.28001	1.00507	1.20476	1.18658	1.0389	0.617312	1.11222	1.27911	0.667485	1.26084	0.707991	0.954554	1.17282	0.538738	1.42931	1.12544	1.11711	1.29105	1.34266
418	chr2	6723427	7275270	1.0476	0.857585	0.944017	0.840348	1.06523	0.679943	1.11394	1.02959	0.800819	0.714397	1.19519	0.977767	1.06974	1.13981	0.953403	0.937474	1.42595	0.88052	1.01926	0.884652	0.732556	0.918353	1.18096	0.879464	1.0154	1.19635	1.11762	0.960772	1.14824	1.11233	1.38626	1.15794	1.09105	1.05399	0.927525	0.739305	1.41433	0.652132	0.88966	1.19968	0.584672	1.29883	1.42578	1.06813	1.21561	0.661884
419	chr2	7275271	7842626	0.941153	1.02712	0.794984	0.754116	1.07441	0.92624	1.05087	0.918602	0.972572	0.593641	1.44252	0.850768	1.27334	0.899533	1.04526	1.0157	0.854603	0.975484	0.892347	0.973591	0.832496	1.12104	0.960358	0.731332	0.722658	1.2174	1.02235	1.12541	0.905143	1.15909	1.01905	0.983421	1.1035	1.08837	0.934651	0.829752	1.10514	0.535706	0.784255	1.11883	0.167408	1.27058	1.0709	1.15111	1.42318	0.762898
420	chr2	7842627	8386014	0.820433	0.768516	0.951224	0.595608	1.14845	0.885313	1.2319	1.21226	0.794808	0.65014	1.15012	0.811986	1.00034	0.975091	1.02474	0.744454	0.702144	1.07801	0.801051	1.08024	0.808112	1.14446	0.997085	0.59965	0.872929	1.29281	0.714132	0.975043	1.18916	1.4721	1.17713	0.868531	1.15793	1.11699	1.20558	0.907491	1.50245	0.457639	1.26085	1.09529	0.910431	1.34855	0.572916	1.15097	1.31504	1.10898
421	chr2	8386015	8903811	0.948934	0.886495	1.07274	0.787582	1.08034	0.809677	1.15522	1.06251	0.838036	0.586928	1.16062	1.03902	1.05756	1.1684	1.18679	1.08664	0.95603	0.922985	1.25151	1.26717	0.778838	0.869996	1.01486	0.781833	0.936628	1.20596	0.954987	0.940492	1.09667	1.30548	0.847296	0.990356	0.940452	1.0477	0.860283	0.615991	1.51612	0.75494	1.28694	1.13633	0.0775502	1.31865	0.774607	0.929858	0.849744	0.956919
422	chr2	8903812	9430458	1.09659	1.02463	0.926066	0.557638	0.94237	1.07117	0.737903	1.00399	1.19307	0.913173	1.12217	1.03871	1.15324	0.979121	0.848294	0.918737	1.25047	1.48554	1.09854	0.997904	0.658693	1.02267	0.734605	0.768812	1.04747	1.30781	0.756411	0.769331	0.984641	1.26286	1.10929	0.901086	0.928493	1.0693	0.835732	0.79398	1.27111	0.441933	0.997585	0.99359	0.452975	1.13194	0.837146	1.08274	0.933967	0.82144
423	chr2	9430459	9945760	0.797916	0.615562	0.888306	0.841071	0.870624	0.973128	0.991025	1.09472	0.785853	0.940048	1.29568	0.995799	0.895966	1.11246	1.12857	0.912568	1.28149	1.08229	0.942359	0.650142	0.883618	1.32741	0.905378	0.600057	1.18037	0.724052	0.621577	0.981035	0.930255	1.26709	1.08463	0.854664	1.08599	0.987843	0.769779	1.19142	2.14988	0.684472	1.15723	1.21365	0.607015	0.891493	0.768399	1.01788	1.37861	1.05153
424	chr2	9945761	10475708	1.00098	1.06576	0.96399	0.81229	0.894174	0.796097	0.880949	1.09459	1.05023	0.942618	1.25383	0.778662	0.854736	1.35477	1.00181	1.15127	1.13705	1.03231	1.00935	1.06095	0.747737	1.43605	0.918344	0.706889	1.10782	0.440855	0.946978	1.08217	0.939702	1.15468	0.936936	0.880232	0.98713	1.16243	0.863198	1.21917	1.27062	0.588988	0.664064	1.06926	0.69685	1.01192	1.04128	1.14883	0.989874	0.787198
425	chr2	10475709	11003433	0.848163	0.9217	0.960901	0.806679	1.26153	0.945267	0.925186	1.05442	1.14978	1.06662	1.41142	0.779025	0.996224	0.962226	0.910331	1.14577	1.07029	0.959829	0.88481	0.772317	0.740174	1.02817	0.859019	0.946682	0.990583	0.908894	1.10095	1.10042	1.01258	1.2511	1.14094	0.944047	1.31888	1.07406	0.793141	1.07753	1.6585	0.498747	1.09615	0.799331	0.693074	0.856526	0.9562	1.21758	1.04958	0.805583
426	chr2	11003434	11557325	1.09758	0.87478	0.93946	0.970195	0.967998	0.911301	1.00067	0.935598	1.01231	0.957699	1.28119	0.912839	0.909366	0.853986	1.0579	0.970184	0.645123	1.33053	1.3005	0.836472	0.710657	0.694233	0.978075	0.816798	0.988611	0.840454	0.955289	1.02309	1.14564	1.23124	0.984219	0.726372	1.14834	0.870823	0.862489	1.3435	1.0921	0.494887	0.534637	0.820183	0.96387	0.649184	0.725035	0.857062	1.28085	0.838086
427	chr2	11557326	12103599	0.833038	0.285782	0.901682	0.82588	0.90836	0.686009	0.872271	0.972928	1.1848	0.825727	0.913522	0.710623	1.04642	1.12089	1.08317	0.960445	0.965504	1.07648	0.985092	1.28603	0.810199	0.640564	0.808068	0.726272	0.916531	1.0996	0.909353	1.07437	0.836665	1.1477	1.04565	1.04587	1.12523	1.03861	0.940141	1.10539	1.12401	0.278488	0.264761	1.05359	0.722956	0.257237	1.26512	0.846559	1.12331	0.966224
428	chr2	12103600	12658986	0.915018	0.30528	1.15394	1.4266	1.00711	0.730261	1.19238	0.982309	1.48847	0.969942	1.41982	0.955606	1.01054	1.09504	1.23543	0.903598	0.445281	1.32155	1.18643	1.34134	0.780953	0.999968	0.954434	1.06961	1.41791	1.16941	1.16138	1.51613	1.03185	1.37686	1.21697	1.13104	1.05349	1.19519	0.940428	1.51796	1.6728	0.308669	0.426126	0.924789	1.18723	0.364423	1.20032	1.05459	1.16363	1.53338
429	chr2	12658987	13221735	1.10311	0.377408	0.949926	1.23923	0.992041	1.1031	1.16336	1.45972	1.20929	0.935591	1.20495	1.02145	1.22579	1.15972	0.941838	0.966731	0.966842	1.21126	1.12769	0.959783	0.620707	1.11884	0.994785	0.735633	0.960474	1.08254	1.15428	0.955002	1.09767	1.37488	1.10328	0.944255	0.946068	1.04147	0.839422	1.16615	1.12922	0.338372	0.291939	1.00366	0.812663	0.378421	0.929718	0.846066	1.20514	1.34494
430	chr2	13221736	13883879	1.07962	0.252235	0.745385	1.28542	1.03159	0.852222	0.934443	0.985221	1.58522	0.817528	1.27662	1.62093	1.00951	1.0031	1.15668	0.93785	1.72872	0.977994	0.912321	0.916759	0.650046	0.927511	1.25907	0.953937	1.28593	0.912521	0.973171	0.994951	1.13296	1.43425	1.14605	1.00103	1.27923	1.17695	1.11606	1.26627	1.81433	0.401355	0.40284	0.882478	1.32841	0.654226	1.25364	0.971893	1.12497	1.36948
431	chr2	13883880	14533355	1.02263	0.252271	0.975878	0.93284	0.963795	0.598913	1.00797	1.16312	1.73055	0.903964	1.58238	1.09006	1.00988	1.03915	1.39567	0.917802	1.19544	0.912684	1.11948	0.933504	0.654845	1.37506	0.939312	1.22911	1.26216	1.46909	1.10314	1.07601	1.16476	1.37422	1.05656	1.15451	0.959057	1.12685	1.03491	1.1928	1.58911	0.31229	0.382786	0.999255	0.940826	0.589081	0.968273	1.22209	1.27392	1.22758
432	chr2	14533356	15114507	1.10177	0.231185	0.969679	0.975125	1.27256	0.738671	0.951395	1.17303	1.16199	0.94791	1.66144	1.06097	1.09311	1.13053	1.45209	0.936499	1.78707	1.35858	1.08247	0.957359	0.71146	0.455999	1.72116	0.985578	1.34873	0.932221	1.03574	1.19628	1.29825	1.1894	1.23202	0.782719	0.904958	1.02116	0.904017	1.2134	1.48242	0.287815	0.477013	0.804755	0.538321	0.50546	1.1485	1.42659	1.2204	1.18627
433	chr2	15114508	15718462	0.935547	0.642865	1.03808	0.615136	1.10684	0.592689	1.08336	1.12945	1.45069	0.87882	1.53959	1.192	0.902278	1.31437	1.16109	0.991621	1.01628	1.23058	1.00961	1.16295	0.656939	0.969431	1.25047	0.989439	1.10472	0.980277	0.975486	0.939501	1.14073	1.33877	0.931591	1.15295	1.09668	1.01332	1.03891	1.19591	1.50185	0.821998	1.33668	1.16308	0.632125	0.992314	1.01486	0.87475	1.17131	1.24432
434	chr2	15718463	16266132	1.21321	0.58626	0.903684	0.989123	1.22506	0.861226	1.11065	1.32794	1.39745	1.06077	1.26171	1.17664	1.09485	1.16465	0.922122	1.17848	1.12127	1.18836	1.26457	1.13987	0.703141	0.956393	1.08293	1.13977	1.17588	1.15367	1.37734	1.18737	1.13703	1.07283	1.10505	0.878919	1.06478	0.989318	1.0283	1.32498	1.48532	0.533418	0.666492	0.907509	0.54131	0.680209	0.963955	1.30842	1.17215	1.38957
435	chr2	16266133	16886870	1.06954	1.14121	0.972052	1.14128	0.880979	0.93667	1.03536	0.971981	1.15681	1.17519	1.59736	0.918395	1.50635	0.923744	1.02639	1.13304	0.749918	1.11539	1.47216	1.27064	0.704153	0.636818	0.9425	0.961076	1.34401	1.21802	1.03784	1.18806	0.856281	1.05876	1.02418	0.989382	1.26466	1.10974	1.13378	1.44764	1.72049	0.605303	0.893191	1.05885	0.644709	0.775537	0.863522	1.6139	1.55727	1.1069
436	chr2	16886871	17478741	1.03527	0.833717	1.02938	1.00868	0.808242	0.896987	1.25828	1.10589	1.81278	1.00311	1.78505	1.09812	1.43176	0.898809	1.13885	1.06319	1.03592	1.07715	1.23165	1.01785	0.621919	1.01534	1.0389	1.08486	1.03394	1.06018	1.26703	1.18694	0.980042	1.32952	1.22622	0.92911	1.01562	1.11484	0.848738	1.43819	1.55828	0.736007	0.897265	1.07539	0.784008	0.998163	1.28903	1.41268	1.01188	1.63695
437	chr2	17478742	18071058	1.11679	0.915986	0.893551	1.05188	1.10522	0.692816	1.04473	1.17369	1.14442	0.973407	1.59725	0.902382	0.950488	1.16207	1.10662	0.984439	1.30537	1.36282	1.07113	1.10285	0.736353	0.738406	1.05587	0.917129	1.12838	1.23977	1.04335	1.16326	1.2298	1.12912	1.2188	0.8417	1.13876	1.02069	1.19773	1.18927	1.42377	0.710714	0.702165	1.20857	1.03899	0.723858	0.914217	1.15222	1.17837	1.74088
438	chr2	18071059	18637274	0.916607	0.920547	0.839255	0.933537	1.11487	1.1569	1.02909	1.01588	0.802314	1.11382	1.38283	0.853876	1.22562	0.950061	0.985766	0.946448	0.934353	1.06453	0.992065	1.21369	0.71008	0.604269	1.1673	1.07353	1.39134	1.04521	1.11959	1.0069	0.973128	0.989168	0.986847	1.06763	0.829642	0.841859	1.06205	1.23004	1.43477	0.545663	0.816773	0.936645	0.913752	0.778356	1.14005	0.720604	0.706788	1.15894
439	chr2	18637275	19207449	1.19282	0.75015	0.959351	1.11131	1.19778	0.959022	1.12182	1.06124	1.20494	1.05477	1.34934	1.08003	1.02485	1.18602	0.961954	0.974891	1.08796	0.847925	0.888828	1.01273	0.718842	0.411362	1.03881	0.743919	0.958677	1.45405	0.989687	0.774859	1.01108	1.11538	0.933481	1.23957	1.24902	0.913093	1.19565	1.17297	1.47827	0.534819	0.9726	0.92326	1.52435	0.813402	0.971155	0.867226	1.11817	1.05122
440	chr2	19207450	19763965	1.04196	0.670141	0.80964	0.776017	0.915315	0.999398	1.07974	1.06288	1.19694	1.07278	1.40029	1.07684	1.02045	1.02541	1.04223	0.944521	1.26569	1.20253	0.868714	1.05099	0.616621	0.481803	1.20489	0.654251	1.16444	0.903267	1.22278	0.94947	0.964016	1.39836	0.880247	0.847533	0.854252	0.979716	1.20092	1.02328	1.15467	0.68342	0.872441	1.07264	1.43634	0.802594	1.07499	1.09398	0.850424	1.50286
441	chr2	19763966	20303189	1.17793	0.84471	0.993587	1.15381	1.06158	1.15553	1.11734	1.08522	1.01826	1.01552	1.55446	0.929843	1.34028	0.718947	0.753845	1.00201	0.853829	1.36912	0.886102	0.891981	0.645048	0.616216	0.781407	0.813532	1.19186	1.01168	1.02798	1.06481	0.974242	1.33968	0.819435	0.744125	0.921859	0.884315	1.09803	1.21844	1.02874	0.769983	1.07444	0.965462	1.4662	0.713995	0.747631	1.06554	1.00717	1.36693
442	chr2	20303190	20818382	1.06978	0.781009	0.862271	0.815235	0.885072	1.0939	1.15563	1.30094	1.29764	1.15757	1.2186	1.17049	1.01562	0.973879	0.779144	0.881494	0.550304	1.09299	1.09896	1.12859	0.800363	0.279508	1.06486	0.544795	1.31236	1.21115	0.976356	1.03292	1.12477	1.22326	0.876865	1.0899	0.937734	0.983793	1.14419	1.16703	1.04645	0.481231	0.818896	0.895972	1.75137	0.615827	1.01601	1.2615	1.23551	1.01169
443	chr2	20818383	21397363	1.11282	0.801459	0.787214	0.949815	0.98689	1.08766	1.02768	0.940469	1.38596	1.37092	1.05775	0.935682	1.15183	1.0635	0.959551	0.964116	0.712625	1.01856	0.831883	1.44082	0.722887	0.480727	1.03634	0.653849	1.01251	1.10982	0.903078	1.30857	1.01278	1.21739	1.03953	0.968383	0.587185	0.955747	0.997205	1.22267	1.88856	0.528568	1.13362	1.22764	1.19913	0.853139	0.851195	1.10392	1.10028	1.06027
444	chr2	21397364	21992730	0.976102	0.984867	1.28974	0.835618	0.942383	1.06478	1.09374	1.07305	1.26464	1.47086	1.36174	0.690624	0.885389	1.16548	0.770109	0.933011	0.453585	1.18806	1.18844	1.13755	0.666596	0.671224	1.25788	0.665087	1.03337	0.940985	1.12591	0.93167	1.16617	1.10051	1.00824	0.853808	1.14216	1.15304	1.17747	1.36006	2.56881	0.504847	0.995098	1.11926	1.37985	0.773483	0.868241	1.0328	1.2699	1.69682
445	chr2	21992731	22606020	1.07423	0.592917	1.32413	1.16981	0.955028	1.50681	1.30485	0.897326	0.745176	1.36536	1.47288	0.849531	1.26601	1.06633	0.866672	0.928806	0.295932	1.23413	1.11524	1.27444	0.704107	0.823473	1.14308	0.716286	1.0943	1.08852	0.990796	1.28118	1.10499	1.18972	1.13602	0.964663	1.04811	0.957488	1.18571	1.47564	1.7156	0.581674	0.637369	1.30088	0.581693	0.64874	1.25369	0.901395	1.45557	1.60112
446	chr2	22606021	23204886	1.00421	0.616996	1.0391	1.27946	0.941835	1.25094	1.28854	0.984289	0.883727	1.43473	1.38433	0.76029	0.89906	1.10953	0.828157	1.01508	0.411206	1.22423	0.852346	1.07802	0.78077	0.645848	1.39009	0.92798	1.27649	0.808448	0.919003	1.26911	1.35457	1.14541	1.08967	1.04641	0.973077	0.942764	1.3642	1.00584	1.53216	0.693267	0.641123	0.796548	1.26282	0.769248	1.06344	1.34476	1.45534	1.26981
447	chr2	23204887	23739795	1.08571	0.751487	1.12119	0.941996	1.25319	1.2055	1.13604	0.933653	0.789129	1.49242	1.31078	0.623352	1.33288	1.09418	0.703072	1.11701	0.481677	1.18147	0.951449	1.07491	0.719399	0.678859	1.16472	0.815238	0.688704	0.872228	1.17188	0.833126	1.05974	1.03906	0.97507	1.19059	1.34673	1.0624	1.07059	1.11898	1.52961	0.531928	0.709435	1.15251	1.10386	0.572821	1.11376	1.44379	1.08518	1.73019
448	chr2	23739796	24307720	1.0065	0.902473	0.846754	0.842336	1.1644	1.47398	1.19073	1.33793	0.724495	1.16593	1.13834	0.939499	1.04175	1.17342	0.587441	1.02027	0.479513	1.10224	1.1431	0.839982	0.551232	0.502107	1.35558	0.85638	1.40719	0.926177	1.21461	0.980579	1.03986	0.982038	0.901532	0.828218	0.822733	1.04659	1.05144	1.24461	1.69448	0.67041	0.534118	0.938929	0.583625	0.63012	1.04844	1.22646	1.35304	1.10417
449	chr2	24307721	24887019	0.912912	0.798446	0.711609	0.89811	0.858134	1.24585	0.975862	1.32031	0.771812	1.19705	1.33023	0.897429	0.88233	0.909112	0.433526	0.858167	0.448839	1.02079	1.34043	0.95768	0.94705	0.573399	1.12078	1.02381	1.03316	0.902622	1.04704	0.960375	0.877502	1.20302	1.06167	1.11558	0.742886	0.997916	1.15185	1.03297	1.28366	0.588045	1.00415	1.06774	0.591406	0.756173	1.02239	0.837353	0.80656	1.02304
450	chr2	24887020	25449427	1.06581	0.873763	1.06284	1.05553	1.0767	0.864277	1.05635	1.16411	0.948076	1.08109	1.04741	0.670835	0.743437	0.861527	0.53463	0.791953	0.680187	1.05847	1.0586	0.945742	0.796677	0.859744	1.25959	0.743993	1.26304	1.10743	1.05399	1.10278	1.04698	0.912205	1.00876	0.945962	1.1161	1.06474	0.982198	1.27998	1.3536	0.550626	0.867148	0.767663	0.7024	0.771407	0.849408	1.04809	1.06007	1.02813
451	chr2	25449428	26000393	0.734187	1.10031	0.861721	0.972098	0.821609	1.20063	1.1928	1.33212	0.958183	0.758712	1.45379	0.66373	0.684225	0.960571	0.523168	0.895267	0.925602	0.913704	0.958907	1.09244	0.730354	0.936757	1.21955	0.586303	1.09377	0.802531	0.962763	0.70559	1.07554	0.969696	1.07791	0.920791	1.00529	0.955224	0.778481	1.34246	1.10774	0.701906	0.780263	0.86797	0.652196	0.625923	0.849411	0.977106	1.32561	1.05977
452	chr2	26000394	26577169	0.944534	0.789487	0.985732	1.09116	0.855619	1.01987	0.961384	0.739507	0.736112	0.940887	1.27711	1.04377	1.12109	1.04898	0.713036	0.950912	1.19952	0.90315	0.95108	1.109	0.670021	1.23604	0.888885	0.554478	1.17332	0.888278	0.892419	0.912156	1.02475	1.0327	0.897916	1.16609	0.941858	1.10732	0.943325	1.02238	1.19808	0.490302	0.902239	0.702967	0.817859	0.601763	1.09171	0.863532	1.05728	1.15897
453	chr2	26577170	27100948	0.994668	0.900125	0.877731	0.855416	1.30351	1.37723	1.27921	1.19581	0.864208	1.06976	1.28056	1.0149	1.10372	0.773585	0.717066	0.945236	1.14689	1.17774	0.948305	0.866325	0.683638	1.30208	0.85656	1.00865	0.824266	0.783429	1.16494	1.10074	1.14012	0.896697	1.00864	0.877435	0.878335	1.08788	1.03814	1.0919	0.54078	0.700464	0.831624	0.981965	0.608211	0.734379	0.941634	1.01574	0.76141	1.10575
454	chr2	27100949	27663459	0.9741	0.773493	0.743783	1.01115	1.24119	0.851527	0.998947	1.04558	1.20667	1.00477	1.12875	0.91194	0.866043	0.98525	1.00207	0.828289	1.20367	1.08569	0.656472	0.8086	0.735165	0.877668	0.706747	0.85226	0.894284	0.905784	1.28651	1.13166	1.06398	0.816507	0.98523	0.843012	0.751835	1.12256	0.819358	1.25586	0.805622	0.541144	0.971653	0.868882	1.55195	0.917754	0.94858	0.981663	1.01647	1.41717
455	chr2	27663460	28239818	0.873687	1.02869	0.792538	0.748366	1.17377	0.661419	0.866095	1.09262	0.644494	0.883615	1.30766	1.1103	1.1364	1.0561	0.951648	0.858346	1.11493	0.950778	1.11408	0.889892	0.598796	1.05218	0.835858	0.758501	1.09281	0.957252	0.555361	0.954409	0.963853	1.027	0.850088	0.875172	0.775293	1.01814	1.12101	1.13863	1.16113	0.600661	1.02178	1.05925	0.739789	1.14141	1.02968	0.599346	1.3901	0.966336
456	chr2	28239819	28771162	1.21393	0.825799	0.963848	0.821334	1.10584	0.703913	0.957069	0.862614	1.06432	0.910638	1.0628	0.736109	1.08434	0.8442	0.822678	0.683037	0.979235	0.818319	0.99147	1.1228	0.51482	1.32432	0.9095	0.916114	1.35663	0.920971	0.877992	0.998622	1.2208	1.18605	1.03048	0.94361	0.762548	1.09967	1.0111	1.34189	2.00637	0.416403	1.0952	0.7572	0.556708	1.01699	1.29565	1.02548	1.11317	0.826909
457	chr2	28771163	29307027	1.04574	1.21503	0.949948	1.27876	0.902163	0.968677	0.848471	1.11078	1.27392	1.06536	0.99378	0.97003	0.897984	0.934442	1.22886	0.925434	1.15716	1.24369	1.05439	0.929544	0.591044	0.489916	1.26152	1.0363	0.753012	1.11569	1.07415	1.02776	1.07454	1.14381	0.931603	0.891457	1.00684	1.12943	0.730805	1.17837	1.03425	0.446621	1.24577	1.49699	0.0566886	1.19276	1.16206	1.01056	0.909048	1.06274
458	chr2	29307028	29816036	0.793798	0.891197	0.677982	0.791949	1.10143	0.806567	0.839397	0.951989	1.24167	0.832428	1.21849	0.736434	0.805457	1.01143	1.14665	0.808993	0.872333	1.01763	0.670589	1.19611	0.772592	0.667564	0.686176	0.685272	1.16765	0.771875	0.91353	1.11326	0.92986	1.12071	1.2502	1.12117	1.23623	1.20668	0.997764	1.0109	0.708177	0.634968	1.27041	1.35794	0.957207	1.11793	0.851629	1.47274	1.05091	1.26714
459	chr2	29816037	30341973	0.771328	0.872107	0.919686	0.968301	1.21875	0.853113	0.991776	0.970307	1.3702	0.877988	1.24006	0.644315	1.15873	0.932153	1.43124	0.905065	0.905734	1.16189	1.02236	1.18835	0.676032	0.505334	0.999692	0.857184	1.05925	0.922127	1.14965	1.10875	1.00321	1.27138	0.984135	1.00724	1.28902	1.05583	1.07202	1.29452	0.684444	0.694955	0.8347	1.2416	0.45203	1.10162	1.31315	0.957396	1.27218	1.44464
460	chr2	30341974	30864415	1.01599	0.529794	0.966457	0.777667	1.14533	0.85535	0.89589	1.06787	1.08356	0.936832	0.992482	0.98672	0.940186	0.937861	1.71133	0.827741	1.1213	0.900463	1.05853	0.869601	0.667065	0.56137	1.3398	0.941032	0.872502	1.12732	0.922511	0.943349	1.03564	1.15155	0.915754	0.799184	0.724214	1.03076	0.769286	1.0018	0.889363	0.567438	1.14267	0.898104	0.278324	1.0478	0.983589	0.939021	1.11863	0.904339
461	chr2	30864416	31383531	1.05433	0.67352	1.02	0.758886	1.04006	1.01019	1.02255	0.89855	1.385	1.19673	1.579	0.939501	1.14322	1.26077	1.19129	0.866621	0.697186	0.78319	1.06046	0.989382	0.84857	0.462319	1.29581	0.629997	1.02016	1.17906	1.10307	1.04405	0.93598	1.11653	1.13679	1.0836	0.999163	1.05475	0.847207	1.04502	0.834215	0.656328	1.06418	0.809	0.784745	1.01852	1.48297	0.982384	1.19701	1.15478
462	chr2	31383532	31935767	0.903754	0.849285	0.84118	1.0518	1.00569	1.0612	0.94968	0.860294	1.22722	0.977338	1.36422	0.996228	1.20017	0.917901	1.51656	0.829422	0.555609	0.970602	1.13193	1.04976	0.694051	0.701924	1.42547	0.651656	1.1662	1.32231	1.19218	0.952508	0.994011	1.15493	1.04379	1.04629	1.04804	1.02376	0.840589	1.05179	1.16565	0.57697	1.23707	1.15211	0.593352	0.951189	1.35442	1.29326	0.966226	1.01104
463	chr2	31935768	32597270	1.24809	0.7657	0.978201	1.15129	1.2248	1.48663	1.00546	1.11345	1.08999	1.09649	1.55135	1.06232	1.07947	0.971267	0.873355	0.882945	0.439737	1.11162	1.20431	0.940474	0.692133	0.647754	1.00923	1.06998	1.10712	1.11797	1.05017	0.859349	1.04987	1.21899	1.13286	0.96081	1.11489	1.16374	0.939896	0.983517	1.0769	0.455044	0.832093	0.871715	0.929154	0.969835	1.00118	1.14756	1.23281	1.06457
464	chr2	32597271	33198565	0.945494	0.853004	0.618182	1.03937	1.11804	1.59574	1.03411	1.32756	1.33308	1.12337	1.16472	0.981642	1.09562	1.12661	1.1891	0.875446	0.585149	1.04059	1.0096	1.19767	0.627743	0.365821	1.27034	0.939959	1.34488	1.01295	0.948774	0.939477	1.01515	1.37659	1.01455	1.06755	1.05528	1.00145	0.92838	1.18658	1.09512	0.495608	0.918955	0.89873	0.796461	0.598394	1.20815	1.53079	1.06485	1.14715
465	chr2	33198566	33738047	1.1073	0.792715	0.776786	0.645431	1.11843	1.20557	0.902168	1.23761	1.44193	1.11167	1.62367	0.731971	0.951254	1.28641	1.35727	0.80429	0.732861	1.27963	1.18215	1.1165	0.593175	0.645916	1.04175	1.05559	1.3079	0.81848	0.908824	1.12296	1.04154	1.2845	1.14151	0.777193	0.84599	1.04621	0.97258	1.07164	1.09141	0.645196	0.790342	1.2817	0.975869	0.639806	0.678361	0.961482	1.14798	1.26778
466	chr2	33738048	34329598	1.14149	0.943516	0.858374	1.40726	1.10351	1.10313	1.06693	1.18725	1.26781	1.32637	1.19187	1.05628	0.9516	0.863627	1.07112	0.790959	0.6173	1.02423	0.785354	1.30383	0.722542	0.568305	1.26263	0.860869	0.888438	1.01693	1.14085	0.933775	1.12903	1.22154	0.992947	0.972866	1.1675	1.03761	1.19286	1.2426	2.3552	0.664202	0.81326	1.07535	0.554096	0.688728	0.978647	1.28477	0.971299	1.00872
467	chr2	34329599	34969115	1.08373	1.07074	1.00336	1.19661	1.18771	1.30265	1.05631	1.39434	1.12935	1.36013	1.76445	1.15223	1.11065	1.03704	1.1432	0.936614	0.954374	1.281	1.01332	0.980625	0.692328	0.677787	1.51826	0.927964	1.27839	1.08476	0.991433	0.706674	0.889066	1.18911	0.98592	1.06179	0.874425	1.10627	1.25397	1.23418	1.75941	0.657346	0.877313	1.34886	1.056	0.563632	1.61574	0.926692	1.10578	0.673908
468	chr2	34969116	35642877	1.03387	0.886034	0.898175	1.16348	1.05508	1.47863	1.0499	1.01153	0.964226	1.15129	1.61271	0.687604	1.06106	1.09057	1.25439	0.968634	0.93178	1.02546	1.1474	0.910115	0.679337	0.622219	1.77994	0.949726	0.840225	0.911185	0.902348	0.973978	1.11433	1.07027	1.05591	1.12819	1.22551	1.00299	1.11064	1.1439	1.54432	0.660336	0.846075	1.17903	1.07065	0.671559	1.22873	1.50888	1.36376	0.89217
469	chr2	35642878	36301261	1.20824	0.947296	1.01049	1.34679	0.867877	1.06691	1.25355	1.26918	1.34068	1.21467	1.71509	1.17441	1.2027	0.994791	1.5134	0.860555	0.895318	1.13822	0.955539	1.17737	0.715116	0.653294	1.43391	0.9047	1.09519	1.28637	1.08628	0.584661	1.15045	1.17281	1.01179	1.13664	0.90229	0.967958	1.57907	1.18885	1.67357	0.482756	1.05245	0.973849	1.21962	0.511048	1.40357	1.53567	0.957782	1.56937
470	chr2	36301262	36879041	1.06591	0.857646	0.874298	0.869859	0.814155	0.930659	1.2754	0.995271	1.25269	1.28194	1.55679	0.959033	1.1771	1.08776	1.28701	0.813561	1.00398	1.16422	1.03144	0.971091	0.695539	0.732341	0.890689	0.875163	1.17562	0.898274	1.26663	0.922416	1.02547	1.54911	1.13998	0.996446	1.11967	1.11875	1.32739	1.04403	1.06092	0.484835	0.711802	0.830299	0.482015	0.60226	1.01825	1.56594	0.848634	1.08261
471	chr2	36879042	37431136	0.981194	0.964611	0.829407	1.13032	1.06094	1.14931	1.07711	1.14697	1.31012	1.11658	1.34352	1.22154	0.884111	0.648569	1.38823	0.698842	0.766408	1.08703	1.09185	1.05952	0.644427	0.68917	1.05499	0.793314	1.04811	0.887964	0.927566	1.16361	0.905325	1.08006	1.01877	0.82251	1.37458	1.08612	1.29485	0.965425	0.847919	0.595894	1.05624	0.81684	0.997434	0.613898	0.948517	1.15042	1.16811	0.974296
472	chr2	37431137	37979780	0.817608	1.14388	0.802216	1.02995	1.03663	1.25888	0.972046	1.24776	1.40467	0.977997	1.20715	1.24269	0.98385	1.12379	1.10095	0.911785	0.693141	1.10541	0.925322	0.974781	0.698445	0.480577	1.20818	0.84853	0.672283	1.14779	0.979287	0.911793	1.01411	1.0324	0.933232	0.872399	0.766589	1.02753	1.22615	1.24984	1.54481	0.525092	1.02212	0.931022	1.41915	0.833043	1.12475	0.940069	1.11374	0.936265
473	chr2	37979781	38517812	0.960774	0.738155	1.02862	0.811661	0.876635	1.09254	0.996226	0.954938	1.06388	0.819546	1.14821	0.674562	1.11573	0.890552	0.972708	0.804639	0.724779	0.955756	0.699138	0.707521	0.67206	0.558124	1.44375	0.878125	1.00462	0.926988	1.18562	0.947537	0.867464	1.21549	1.05268	0.792093	1.07566	1.02552	1.1626	1.07272	1.01694	0.385088	0.984693	1.20664	1.52894	1.13759	1.35634	1.61157	0.709979	1.14325
474	chr2	38517813	39087244	0.966681	1.04961	0.807365	1.04825	0.92214	1.20035	0.998756	0.955481	1.32447	1.03338	1.59251	1.15953	1.00636	0.845205	1.27522	0.955751	1.05265	1.18162	1.10379	0.837215	0.762237	0.972009	1.60419	0.947554	1.2165	0.962574	0.917707	1.29531	0.830278	1.00778	1.18008	0.744698	0.834875	1.05814	1.09528	1.09847	1.38419	0.717591	0.812476	1.24567	1.7667	0.902052	1.13766	1.35908	0.816086	0.644233
475	chr2	39087245	39678823	0.937775	0.738278	0.999373	1.15681	0.930739	1.52806	1.07542	1.1118	1.16768	1.0481	1.17255	1.24065	1.0302	0.892948	1.11886	0.961815	0.485404	1.06243	1.0521	1.10252	0.615778	0.618501	1.47781	0.764647	0.817162	0.957376	0.898213	1.13836	0.798423	1.05598	1.00192	0.969327	1.16251	1.09426	1.04676	1.04616	1.1521	0.456676	0.846503	0.699435	0.876343	1.06051	0.680579	1.00259	0.634989	1.20597
476	chr2	39678824	40223561	0.913365	0.773866	0.798941	1.17482	0.814391	1.60254	0.88594	1.20068	1.11568	1.4152	1.47815	1.00164	1.16426	1.12736	1.02716	0.838471	0.992828	1.07323	1.02948	0.870735	0.84918	0.51602	1.54772	0.919285	0.906797	1.0671	1.07472	1.26934	1.09918	1.12677	1.07793	1.24793	1.03207	1.11324	1.21982	0.909052	1.48042	0.511709	0.832061	0.716121	0.967797	0.925662	0.660199	0.969933	0.957259	1.06729
477	chr2	40223562	40783523	0.934538	1.07998	0.777073	1.36806	1.05485	1.57348	1.03208	1.02312	1.15515	1.41311	1.46501	1.04703	0.804419	1.09796	1.29986	0.762384	0.654032	0.939388	1.11682	0.99228	0.843181	0.540459	0.83723	0.815578	0.813913	0.892066	1.07877	0.799228	0.767991	1.01374	1.21978	1.20404	1.03705	1.15555	1.03425	1.12088	1.20719	0.518653	0.81963	0.917995	1.11734	1.22209	1.46125	1.43612	0.936543	1.02958
478	chr2	40783524	41400376	1.00805	0.651771	0.79439	1.1732	0.960495	1.39138	1.01095	0.937115	1.04609	1.15792	2.04166	0.962505	1.11173	0.95623	0.857527	0.803286	1.18445	1.28547	0.998555	0.987659	0.78577	0.499197	1.06961	0.608644	1.09165	0.979986	0.961076	0.93429	0.896574	0.774147	1.04942	0.886724	0.767046	1.06369	1.19829	0.871693	1.18215	0.538942	0.7638	0.848652	0.900382	1.11232	0.720937	0.781133	0.730219	1.16011
479	chr2	41400377	42006964	1.03605	0.974021	0.906214	1.08418	0.811213	1.68509	1.1228	0.980468	1.50733	1.29862	1.5473	0.893429	0.876416	1.38782	1.03458	0.720784	1.01563	1.10465	1.31234	1.0832	0.777627	0.537029	1.06752	0.842678	1.22597	1.14855	0.971495	0.933268	0.932143	0.849213	1.11025	0.973944	0.89524	1.17378	1.12792	1.06139	1.17353	0.543944	1.08187	1.05543	0.571849	0.818476	1.02477	0.982774	0.964468	1.23166
480	chr2	42006965	42563140	0.92601	0.931209	0.990946	0.772661	1.17559	2.01513	1.11195	0.910748	0.917176	1.31013	1.28433	1.06925	0.855233	0.991159	0.775282	0.855861	1.45696	1.1582	0.905125	0.751824	0.787942	0.428647	1.12302	0.77128	0.864186	0.843182	1.04555	1.24345	0.772133	1.0565	1.05705	0.871435	1.10151	1.14224	1.06754	1.02698	1.62477	0.460008	0.834635	1.15031	1.02779	0.842397	1.15943	1.22909	1.1793	0.926409
481	chr2	42563141	43142304	0.96276	0.873856	0.772262	0.991829	0.885654	1.35677	0.982143	1.00865	1.17854	1.08565	1.91642	0.963565	1.15312	1.20273	1.0933	1.03427	1.1058	0.873598	0.970576	1.05904	0.721003	0.540449	1.29216	0.638396	0.962199	1.05046	1.02516	1.08742	0.881556	1.09092	1.22474	1.12731	0.742678	1.14354	1.02717	0.940681	1.76444	0.668083	1.04875	1.00615	0.904678	0.719436	1.0876	0.891726	1.18256	1.0614
482	chr2	43142305	43662661	1.07536	0.828805	0.879518	0.941187	1.00222	1.1714	1.12521	1.06944	0.958371	1.11631	1.63456	1.06008	0.865327	1.30585	0.889322	0.744762	1.03611	0.907623	1.00697	0.966386	0.83975	0.96227	0.5446	0.696502	0.991855	0.930717	0.911419	1.11804	1.03976	1.00318	1.14174	0.899967	1.05913	1.05875	1.18051	1.14751	0.313656	0.660961	0.905727	0.833478	0.417569	0.585288	1.18336	1.51168	1.38786	1.04444
483	chr2	43662662	44246905	0.834467	0.709218	0.992541	0.890504	1.0225	1.97746	0.89694	1.1583	1.29799	1.08459	1.53195	1.19008	0.852589	1.12931	1.10885	0.833231	0.971393	1.04608	0.808394	1.18261	0.754989	1.18663	0.878337	0.740082	1.37159	1.20987	0.885963	0.848847	1.00497	1.15285	1.153	0.896623	0.927266	1.18267	1.07022	0.872949	0.53486	0.54099	1.08082	0.82411	0.778552	0.747695	0.840006	1.30551	1.10886	0.963758
484	chr2	44246906	44840512	0.807896	0.95205	0.864439	0.738001	1.02552	1.89448	0.924063	0.942669	0.878799	0.99393	1.94384	1.23405	1.19348	1.0292	0.867584	0.976227	1.17332	1.30672	0.921074	1.05066	0.922401	1.23995	0.949584	0.783007	0.792085	0.982485	1.16452	0.739506	0.679753	1.16539	1.01139	1.01382	1.11999	1.08099	1.18257	1.18312	1.27377	0.532105	0.960859	0.99828	0.373742	0.774507	0.658432	0.87738	1.304	1.28661
485	chr2	44840513	45394967	1.00348	0.921306	0.76766	0.911568	1.00405	2.15511	1.24344	1.08023	1.04334	1.09965	1.42928	0.971698	1.11889	0.880279	1.31114	0.782539	0.738228	1.05573	1.42717	1.34272	0.891228	0.710224	1.16801	0.765106	0.978782	1.29937	0.758743	0.891665	1.10085	1.27534	0.99223	0.722859	1.04857	1.06408	1.13819	0.985875	0.647412	0.755704	1.1813	0.998119	1.2594	0.630166	1.09206	1.32585	1.50568	0.772213
486	chr2	45394968	45955197	1.06817	0.971426	0.840459	0.918895	1.16608	1.63081	1.31289	1.54498	1.23859	1.11301	1.25664	1.18779	0.932	1.22999	1.12081	0.785276	0.913383	1.21994	1.12138	0.845376	1.03145	0.773461	1.37029	0.641966	0.884482	1.06823	0.943608	1.1568	1.002	1.17143	1.35795	0.906981	1.00527	1.07006	1.00366	1.11596	1.71712	0.66117	0.897951	1.06779	2.34714	0.705968	1.13286	1.45488	0.944534	1.03811
487	chr2	45955198	46454667	0.931234	0.918856	0.908842	0.922218	0.790979	1.38118	1.20383	1.04454	1.01502	0.966848	1.53746	0.798491	0.844842	1.09436	1.0793	0.921008	0.653646	0.966638	1.12601	0.816624	0.732171	1.17986	1.08982	0.919844	0.861241	0.969438	0.974063	0.9816	1.10278	1.39322	1.28779	0.935813	1.28134	0.909351	1.13605	0.939119	1.21558	0.618563	1.05074	1.0796	1.66016	0.722934	1.55387	0.926934	1.1831	1.19129
488	chr2	46454668	46973302	0.94572	1.01546	0.979124	1.18331	0.838071	1.53202	0.985387	1.04271	0.853538	1.11992	1.28225	1.03935	1.01973	1.02109	0.713404	0.736658	0.857117	0.893171	0.784746	0.892599	0.890435	0.855649	1.43746	0.811312	1.21047	1.29085	0.920689	1.04141	0.686528	1.19239	1.09757	0.858366	0.905412	0.983365	1.02588	0.901652	0.639794	0.587857	0.806948	0.868129	1.50579	0.660935	0.86694	1.35467	1.12913	1.16663
489	chr2	46973303	47483487	0.893272	0.941077	0.996172	1.21405	1.10733	1.82347	1.25969	0.728887	0.942557	1.17879	1.35409	1.13967	0.99092	1.05283	1.08477	0.809818	0.73108	0.995464	0.814706	0.773811	0.842394	0.538587	1.50832	0.842795	0.952505	1.03929	1.08434	0.927848	0.960098	1.20963	1.18409	0.820938	1.29909	0.955245	0.987566	1.07295	1.49885	0.510889	1.26376	1.00855	0.847749	0.995889	0.783328	1.32398	0.8996	1.2321
490	chr2	47483488	48046218	1.23606	1.15289	0.843084	0.9216	0.825902	1.4553	0.995445	0.918415	1.17335	1.18228	1.41082	1.06205	1.16211	0.897459	1.0188	0.967624	0.636402	0.940487	0.913981	1.18476	0.703067	0.688137	1.5401	0.656724	0.790631	1.02823	0.99178	1.2766	1.04136	1.0177	0.991664	0.781239	0.817863	0.922851	0.903203	0.873066	1.96117	0.547442	1.0299	1.11708	0.847886	0.939184	0.789103	0.880477	1.20674	0.832952
491	chr2	48046219	48650808	1.28574	0.878632	1.02242	0.88399	0.947473	1.63808	1.11415	1.0756	1.15154	1.09677	1.6192	1.15095	1.25802	1.1381	1.07697	0.80218	0.650921	0.794737	0.963678	0.861509	0.91221	0.607623	0.847549	0.664669	1.20035	0.950479	0.871155	1.29152	1.02469	1.0081	1.24762	1.01474	1.07344	0.991445	1.18222	1.05546	1.53791	0.597508	0.960096	0.80421	0.619501	0.864302	0.952525	0.87739	0.896051	1.03442
492	chr2	48650809	49243614	1.13971	1.1034	1.14087	1.17478	1.14732	1.55623	1.09445	1.24615	1.36217	1.18515	1.39118	0.97687	1.13957	1.1335	0.780837	0.884508	0.708258	0.836856	0.956316	0.825847	1.07339	0.495642	0.816324	0.572921	0.85525	0.867242	0.849653	1.11289	1.02953	1.14836	1.05394	0.919414	0.857628	1.03076	1.16402	1.14079	1.32459	0.691805	1.1678	0.799315	1.16267	1.32527	1.1009	1.17261	1.15372	0.960274
493	chr2	49243615	49876102	0.911301	0.927479	1.0846	1.10616	1.13499	1.59493	1.051	1.07878	1.52468	1.04711	1.78117	0.784834	1.45537	0.996718	1.22659	1.0166	0.861838	1.0118	0.666675	0.773787	0.728187	1.00529	1.26736	0.874999	1.13433	0.876598	1.29384	1.17581	1.09562	1.3463	1.33494	0.933581	0.93393	0.946685	1.09378	1.08895	1.55628	0.740265	1.02098	1.22625	1.37166	0.869863	1.29363	0.983071	1.34406	0.853903
494	chr2	49876103	50503028	0.911844	0.69077	0.933443	0.98417	1.01574	1.64508	1.08613	1.14865	1.42437	1.05654	1.479	1.03032	1.15091	0.964741	0.980941	1.0353	1.16985	1.0019	0.98135	1.09026	0.804755	0.681539	0.836463	0.651905	0.883562	1.16306	0.872247	1.24627	1.14386	1.57773	1.16199	1.08706	0.898473	0.969406	1.16523	0.787294	1.2315	0.558773	1.15482	1.03865	1.39787	0.966844	0.985125	1.60872	0.862543	0.834945
495	chr2	50503029	51097943	1.09464	0.854872	1.32379	1.18298	0.90206	1.22276	1.27656	1.32574	1.37655	1.24095	1.80667	1.16236	0.970468	1.05419	0.838264	0.915024	1.12136	1.02832	1.11747	0.834809	0.896155	0.704179	1.12014	1.06644	1.02187	0.947412	1.16353	0.94681	0.957172	1.38838	1.13192	1.05203	0.863925	1.02052	1.02819	1.14148	1.37603	0.55898	1.09029	0.792738	1.77943	0.905313	1.29113	1.24457	1.15838	1.00545
496	chr2	51097944	51727810	0.971537	0.817145	1.15515	1.09312	1.38003	1.16183	1.2323	1.06691	1.31523	1.02805	1.50275	0.984576	1.20502	1.32082	0.873168	1.00133	0.989007	1.22273	1.06301	0.859439	0.927978	0.671466	1.48396	0.997995	1.02697	0.849206	1.32392	1.00956	0.968257	1.36441	1.22239	0.753134	1.07125	0.919608	1.00263	0.896012	1.58435	0.56137	1.05396	0.89665	1.6254	0.978501	1.08818	0.950896	1.09986	1.35794
497	chr2	51727811	52410958	0.768049	0.968134	1.01532	1.00378	0.894734	1.62736	1.22083	0.895251	0.946774	0.948934	1.45142	0.635422	1.11943	0.950719	0.953477	0.853935	0.478516	0.987326	1.02706	0.869337	0.819439	0.403731	1.15813	0.952462	1.09548	0.878725	0.94858	0.994385	1.05879	1.34178	1.21163	0.940114	1.19078	1.14548	1.14255	0.878169	1.90772	0.525745	0.717928	1.07136	0.513839	1.08424	0.767156	1.33163	0.95506	0.694957
498	chr2	52410959	53047196	0.762909	0.970357	1.04913	1.09806	0.791375	1.98134	1.01208	0.888183	1.37421	1.01884	1.45285	1.23276	0.949178	0.764233	1.02376	0.858972	0.489193	1.06287	1.05224	1.01215	1.04554	0.716851	1.37965	0.824961	1.18987	0.987003	0.800052	1.04229	1.03972	1.25625	1.05308	1.00741	0.872351	0.937458	0.987072	0.876733	1.45931	0.413755	0.839543	1.02771	0.740987	1.00645	1.39518	1.40844	1.25192	1.14221
499	chr2	53047197	53670221	0.967777	0.787863	1.18429	0.880993	0.987485	1.92336	1.18084	0.889743	1.60623	1.12641	1.53229	0.955185	1.15713	1.10211	1.20708	1.03528	0.440198	1.15423	0.834059	1.27237	0.966942	0.665028	0.935881	0.767771	1.05042	0.966442	1.10467	0.998229	1.16437	1.44887	1.14825	1.11891	1.2887	1.06133	1.00812	1.06622	1.48833	0.557708	1.02257	0.875734	0.666593	0.943822	1.24716	1.80281	1.20412	1.25675
500	chr2	53670222	54257737	0.95298	0.909327	0.878563	1.19569	1.20509	1.45259	0.938676	1.16109	1.64559	1.01777	1.55688	1.03437	0.986974	1.28495	0.961909	0.979427	0.881379	1.08347	0.969203	1.0336	0.917302	1.17556	0.5543	1.04385	0.905477	0.968725	1.10168	1.16247	1.1205	1.37859	1.26953	0.846732	1.13527	1.04814	1.08779	0.832329	1.63938	0.560765	0.977192	0.858914	1.40532	0.932108	1.07557	1.43875	1.51813	1.29346
501	chr2	54257738	54820139	1.0716	0.876427	0.852361	1.0055	1.22599	1.37448	0.981006	1.38371	1.07067	1.02581	1.66763	1.04923	1.01222	0.959209	0.856818	0.920086	0.695342	1.07451	0.888883	1.2018	0.940784	0.518301	1.18155	1.02334	0.778158	1.03638	1.11859	1.39194	1.00847	1.15601	1.01231	0.946865	1.13572	0.970052	0.895304	0.973542	0.493387	0.517197	1.04498	0.996142	1.05099	0.629292	0.831102	1.02353	0.939574	1.16241
502	chr2	54820140	55348994	0.965558	0.762255	0.863201	1.32523	0.996427	1.56504	1.11728	1.11125	0.856238	1.25934	1.52906	0.909692	1.05763	0.815499	0.904152	0.978213	1.14517	0.981718	1.08772	0.759081	0.923058	0.591798	1.07175	0.793058	1.1322	1.23969	0.997754	1.11595	1.00784	1.08523	1.07525	0.966862	0.733692	0.958196	0.911102	1.01042	0.54616	0.551565	1.24325	1.01661	1.03256	0.859947	1.16601	1.04024	1.18822	1.44512
503	chr2	55348995	55949084	0.908593	1.07023	0.960015	0.797525	0.891716	1.57318	0.986873	1.12681	1.32599	0.908236	1.66017	1.17165	0.903221	0.887398	0.847759	0.791458	0.742052	1.23676	0.927375	0.635953	0.935698	0.885866	1.37383	0.966388	0.768439	1.03368	0.953471	0.892124	0.951247	1.16718	1.20242	1.28812	1.00412	0.985697	0.916619	0.976899	1.71445	0.603079	0.896365	0.825326	1.28984	0.703402	1.34653	1.34745	1.02669	1.19244
504	chr2	55949085	56527410	1.19711	0.895159	1.22914	0.783748	1.06791	1.66401	1.09495	1.30799	1.18831	1.09569	1.42299	0.813829	1.17022	1.09747	0.891344	0.827493	0.499745	1.27	0.801264	1.10036	1.07388	0.599879	0.950104	0.735693	1.0634	1.12988	1.01692	1.09751	1.03703	1.43693	1.14354	1.28051	1.16377	0.954036	1.09913	1.01471	1.49691	0.486965	1.11048	0.97111	0.865991	0.741056	0.874823	1.56767	1.20068	1.04918
505	chr2	56527411	57144947	0.887827	0.970413	0.820943	0.93957	0.957257	1.88851	1.31608	1.29263	1.21451	1.0382	1.49263	0.824729	1.23593	1.03178	0.961288	0.941143	0.145771	1.40065	1.34353	1.11257	0.97958	0.861289	1.02047	0.920541	0.998447	0.790045	1.02222	1.47406	1.21114	1.59058	1.06222	1.20776	1.23815	0.957657	1.20765	1.00263	1.9094	0.714641	0.746861	1.02219	0.706073	0.765522	1.04882	1.13248	0.976337	1.06754
506	chr2	57144948	57821570	1.12552	1.00821	0.952178	1.39001	1.07567	1.74971	1.12245	1.10079	1.38657	1.01303	1.66276	0.77512	1.07063	0.752894	0.78857	0.92334	0.703823	1.2216	1.05837	1.03689	1.03395	0.718837	0.999211	0.855835	0.968582	1.26921	1.05003	1.70694	0.984824	1.10399	1.14325	1.19286	1.03666	1.06699	1.05072	0.931664	1.51519	0.489561	1.22725	0.997917	0.595353	0.899249	1.05267	1.19266	1.1909	1.15949
507	chr2	57821571	58467234	0.908595	0.798144	1.18574	1.00105	1.14249	1.52454	1.04352	1.33696	1.16591	1.13947	1.41262	0.977614	1.03017	0.966785	0.966121	0.904119	0.694413	1.22356	1.08608	0.978338	0.977789	1.01661	1.30035	0.886332	0.959248	1.12617	1.11906	0.876536	0.880004	1.22536	1.18605	0.901451	1.06064	0.976839	1.02906	1.07976	1.73423	0.641816	0.865521	0.913014	0.885811	0.666521	0.862953	1.24508	1.15349	1.17718
508	chr2	58467235	59063278	1.01639	1.07546	1.02568	0.920403	1.21688	1.76877	1.24854	1.3634	0.90296	1.15309	1.39541	1.07597	1.39766	1.05499	1.08483	0.918473	0.564619	1.29214	0.712085	1.04907	1.0807	0.451687	1.23198	0.748934	1.05486	1.42545	1.15017	0.917749	1.10927	1.3547	1.07781	0.934814	0.654188	0.910164	1.05892	0.874475	1.24044	0.63643	0.979812	1.00184	1.36829	0.595566	0.864452	1.40221	1.05796	0.831961
509	chr2	59063279	59627318	0.927239	1.0623	1.3695	1.0005	1.07572	1.56294	1.106	0.945009	0.671368	1.1813	1.70686	0.797644	1.47479	1.02057	1.17498	0.907741	0.654965	1.27468	0.933126	0.938097	0.842937	0.572359	1.26843	0.848285	0.807319	1.0953	0.98564	1.06354	1.13056	1.15098	1.21649	1.0451	1.33504	0.926219	1.16609	0.928997	1.5638	0.668236	0.762546	1.00416	1.08457	0.950079	1.15317	1.16445	1.22919	0.834561
510	chr2	59627319	60229212	1.03417	0.875137	1.01767	1.00802	1.01519	2.02767	1.23157	1.28721	1.06571	1.37734	1.5179	1.04986	0.941971	1.31715	1.0933	0.796679	0.509732	1.23403	1.47768	1.21733	1.01777	0.693985	0.692455	1.11558	1.37499	1.44342	0.883346	1.34376	1.14996	1.36064	1.19404	1.1956	1.12947	1.16204	1.18845	0.984281	1.5075	0.696762	0.696135	1.36734	0.821396	0.991042	0.994823	1.42932	1.14579	0.72638
511	chr2	60229213	60766385	1.00525	0.827271	1.11681	1.0746	0.849155	1.35756	1.22523	1.11644	1.06471	1.39241	1.47917	0.693531	1.26403	1.06732	0.995533	0.998546	0.538942	1.36295	1.06451	1.02022	0.927714	0.74774	1.26247	0.801872	0.798093	1.0139	1.20879	0.948146	1.10344	1.50132	1.24653	1.25903	1.07816	1.04564	1.29744	1.14351	1.69593	0.57514	1.36658	0.993967	0.329086	0.851623	0.748423	1.16479	1.10098	0.615135
512	chr2	60766386	61358979	0.873408	0.741602	0.824274	1.15001	0.977183	1.7368	1.10274	1.2318	1.33077	1.14904	1.52227	0.981142	1.13663	1.06471	1.23658	0.903974	0.673505	1.05752	0.936759	1.34863	0.85041	1.03302	1.22469	0.942009	0.79328	1.23594	0.805125	1.10513	0.838148	1.21002	1.09683	1.12745	1.27775	0.965755	1.06519	0.957511	1.06014	0.624202	1.16845	0.984835	1.15591	0.818531	1.00589	1.54576	1.18316	1.04866
513	chr2	61358980	61947434	1.2066	0.944711	0.837508	1.2377	1.01444	1.75674	1.01667	1.3706	1.07352	1.23897	1.59445	0.894345	1.15055	1.09183	1.00598	0.943194	0.68143	1.2041	1.00655	1.03374	0.81304	1.08879	1.37625	0.853284	1.30817	0.951096	1.02259	0.942484	0.788526	1.3802	1.07529	0.814486	0.815622	1.15205	0.943103	1.21764	1.14083	0.776126	1.07252	0.707617	1.53463	0.754726	0.910958	1.21465	0.869272	1.22416
514	chr2	61947435	62515784	1.03612	1.1163	0.838353	0.90615	0.798271	1.48671	1.07911	1.18047	0.822907	1.12433	1.3882	0.858518	0.907951	1.36897	0.914736	1.03209	0.707271	1.28535	0.803187	0.918964	0.874847	0.730672	1.23286	0.785278	1.18079	1.19314	0.801989	0.879365	1.03643	1.21434	1.11246	0.856046	0.938878	0.932308	1.08089	1.15843	1.26504	0.516436	1.09653	0.877627	0.56903	0.9099	1.08008	1.56362	1.21482	1.19516
515	chr2	62515785	63091836	1.11684	0.813363	0.731731	1.19718	0.86328	1.75127	0.991597	1.11113	1.03536	1.37217	1.32573	0.909966	1.32491	0.953845	1.05781	0.853052	0.642058	1.26289	0.946944	0.565054	0.821626	0.647217	0.937576	0.777667	0.939545	0.991626	0.970415	0.969007	1.03982	1.22669	0.962621	0.791654	1.53069	1.00998	1.0595	1.19135	1.09237	0.801845	1.02236	0.92753	0.670133	1.22791	0.836827	0.946014	1.30143	1.38664
516	chr2	63091837	63702132	0.987671	1.08717	1.04697	0.899144	0.866086	1.86013	1.15942	1.58168	1.43861	1.11491	1.19858	1.07568	0.977265	1.06698	0.961583	0.902199	0.656247	1.01401	1.07769	0.68774	0.900032	0.624714	1.23365	1.01952	1.07819	1.0192	0.753553	0.977112	0.885426	1.32392	0.935612	0.73973	0.980088	1.02895	0.684812	1.0281	1.47002	0.612844	1.03709	1.02018	1.3793	1.21061	0.86444	1.54969	1.16158	1.22891
517	chr2	63702133	64314285	1.04696	0.624616	0.788134	0.926662	1.03085	1.60431	1.07608	1.01795	1.18785	1.18991	1.38136	1.05161	0.965684	1.14942	1.08388	0.90147	0.797889	1.17669	0.833096	0.99258	0.790045	0.652217	1.37397	1.02365	1.17608	1.55336	0.991774	1.01513	0.954973	1.15218	1.03983	0.827688	0.667033	1.13129	0.787084	0.933207	1.34678	0.443506	0.823069	0.818157	1.84286	1.02969	1.16058	1.15682	0.852863	0.943848
518	chr2	64314286	64864049	1.18174	0.956936	1.0132	1.05077	1.49603	1.45813	1.32343	1.42587	0.905577	1.38973	1.88226	1.49349	0.912179	1.29354	0.776338	1.03037	1.41192	1.59579	1.13245	0.797054	1.07903	1.03424	1.42478	1.194	0.982177	0.793088	1.31081	1.05888	1.26947	1.3412	1.19252	1.01819	1.21563	1.46077	1.1993	1.36756	1.32624	0.777199	1.38568	1.04203	0.950387	1.39562	0.878149	0.883212	0.705639	0.898881
519	chr2	64864050	65392921	1.45232	0.956956	1.46037	1.13568	1.73433	1.81312	1.69721	1.51506	0.920145	1.69805	1.82084	1.52472	1.00733	1.3263	0.881895	1.26786	1.32799	1.70173	0.93127	0.945357	1.39386	0.992555	1.70372	1.49861	1.00566	1.05277	1.27868	1.1243	1.36632	1.19627	1.43418	0.767545	1.05134	1.46592	1.50701	1.1867	1.78092	1.10635	1.22446	0.795455	1.01871	1.15947	1.42177	0.8303	0.56779	1.72924
520	chr2	65392922	65965272	1.15539	0.782424	1.19815	1.16613	0.996701	1.52093	1.09092	1.15701	1.16014	0.905195	1.62437	0.98502	0.710978	1.22306	1.11903	1.15314	1.1617	1.31884	1.10447	1.30458	0.907905	0.778456	1.25771	0.868086	1.07407	0.972824	1.40411	1.05049	0.974139	1.17123	1.19317	0.902585	1.08688	1.21072	0.870087	0.991518	2.80029	1.04929	0.963546	1.04164	0.942556	1.18363	0.928791	1.11232	1.0897	1.53195
521	chr2	65965273	66529727	0.964235	1.06247	1.16554	0.776276	0.985038	0.907245	0.97447	0.847538	1.17096	1.0517	1.36925	0.944264	1.06019	1.11967	0.954791	0.907725	0.853994	1.46836	1.02827	0.888427	0.780937	0.925907	1.22174	1.0231	1.39437	0.889443	1.0264	1.04493	0.957445	1.24549	1.15328	0.890704	1.17744	1.18728	1.01881	1.27468	2.29267	1.18538	1.17181	0.87143	0.634114	1.29831	0.906423	1.14765	0.868174	0.621149
522	chr2	66529728	67114299	1.15538	0.641504	0.922329	0.872707	1.14338	1.24083	1.03832	1.12047	0.90433	1.14016	1.45911	0.969916	1.24673	0.826254	1.04991	0.843458	1.57275	1.18105	0.751184	1.04069	0.931096	0.617639	0.974337	0.661499	1.06623	0.712295	1.04121	1.40601	0.995003	1.35624	1.11786	0.804664	0.879609	1.1823	1.17929	0.963241	2.57234	0.660647	0.867381	1.08609	1.30269	1.2174	1.24673	1.12566	0.86266	1.45922
523	chr2	67114300	67686289	0.910667	1.00497	0.94159	0.900943	0.9668	1.01212	1.04893	1.53596	0.990519	0.985217	1.19388	0.886728	1.31291	1.09044	1.14224	0.938821	1.79327	1.11129	1.08151	1.06781	0.96013	0.489451	1.36413	0.82959	0.797229	0.718473	1.12428	0.940693	1.26176	1.28019	0.834482	0.960532	0.852599	1.17951	1.08379	0.895152	1.85186	0.664602	0.830196	1.15022	2.10341	1.24811	0.841376	0.987945	0.521342	1.44104
524	chr2	67686290	68214069	1.03873	0.98495	0.845252	0.999462	0.888425	0.959839	0.804925	1.21865	1.18525	0.918301	1.29984	1.05186	0.967646	1.01655	1.12024	0.837241	1.19174	1.17822	0.926404	1.13448	0.921855	0.92248	1.11774	0.698575	1.0743	0.703943	0.735146	0.796504	0.894262	1.08498	0.951132	1.10257	0.928665	1.14912	1.06214	0.973922	1.88072	0.900825	0.83265	0.97904	0.948653	1.13628	1.28412	1.20965	1.03868	1.15243
525	chr2	68214070	68818686	1.06042	0.763006	0.921495	0.913151	0.924008	1.17158	0.910045	1.24512	1.28832	0.954461	1.15935	1.32239	0.749861	0.999356	0.895531	0.77425	1.35791	1.05599	1.26912	1.04219	0.817413	1.4857	1.20301	1.05565	0.87429	0.761987	1.04146	0.990489	0.794885	1.25867	1.13285	1.03157	0.740479	0.986786	0.874414	1.0113	1.4254	1.0317	1.13925	1.03558	1.33646	1.00973	1.05964	1.06204	1.04079	1.1723
526	chr2	68818687	69360164	1.06772	0.873059	0.97243	1.11147	0.898251	1.28852	1.01193	0.988374	1.07737	1.14738	1.20286	1.07679	0.962698	1.30976	0.944665	0.798245	1.08963	1.07815	0.802935	1.26947	0.888206	1.29107	1.17334	1.09574	0.76723	0.938707	1.09164	0.863023	1.02543	1.34445	1.03386	1.06911	0.922029	1.04232	0.877953	0.998501	1.14926	0.977835	0.903395	1.15782	0.873706	1.15192	0.833209	1.0427	1.28383	1.25017
527	chr2	69360165	69874210	0.876595	0.741282	0.977422	0.496657	0.994939	1.35085	0.959098	1.04919	1.28431	1.16786	1.10756	1.25158	0.876339	1.12478	0.831818	0.948837	1.04779	1.12497	0.940736	0.886178	0.675899	1.06699	0.826548	0.678391	0.990844	0.779079	0.977354	1.08599	1.07816	1.19878	1.07007	0.784851	0.916405	0.948312	1.14817	1.04793	1.23715	0.801041	0.68474	0.915278	1.07068	0.868263	1.17969	1.1891	0.967284	0.866452
528	chr2	69874211	70410720	0.752904	0.845124	0.772942	1.17291	0.733604	1.26012	0.988141	0.894185	0.916971	0.748095	1.19686	1.19273	0.866878	1.16946	0.795497	0.855109	1.07919	0.857531	0.928907	0.810886	0.86275	1.19577	0.788899	0.789122	1.07728	0.957235	0.96749	0.869807	0.838372	1.0731	0.990431	1.07887	0.942359	1.07397	1.07271	1.09819	1.64247	0.879818	0.692095	1.07371	1.87365	1.06565	0.994781	1.62984	0.893684	1.08358
529	chr2	70410721	70934072	0.963135	0.808702	1.06082	1.32779	1.0314	1.00918	1.03635	1.15286	0.936604	0.930098	0.903069	1.08149	0.834207	1.23217	0.89356	0.894203	0.794525	0.84678	0.888848	0.91881	0.739771	1.08376	0.489078	0.850891	1.07558	0.990794	0.874887	0.911828	1.03766	0.931146	0.758751	1.2228	0.769617	0.963641	1.20048	0.858683	0.933359	0.727574	0.952684	0.870584	0.728609	0.984962	0.867689	0.911207	1.04866	0.84291
530	chr2	70934073	71469366	0.925037	0.852339	1.06416	0.712268	0.761963	1.22026	1.12359	0.782867	0.782078	0.99221	0.908	1.00732	0.928521	0.909194	1.15012	0.984227	0.837005	1.04738	1.15921	0.870745	0.820904	1.23901	0.964317	0.564196	1.17059	0.889046	1.16828	0.931924	0.97909	0.99358	0.730742	0.991607	1.19737	1.12207	0.864384	0.843888	0.828881	0.670187	1.01861	0.930575	0.84059	0.848171	1.39468	1.01318	1.21587	0.810888
531	chr2	71469367	72010329	1.00377	0.704034	1.06205	0.822427	1.15302	1.61523	0.824799	1.23939	0.75098	1.0206	0.902879	1.113	1.04926	1.10527	1.30532	0.925356	0.663219	1.24656	0.936716	0.838032	0.630869	0.899833	1.03399	0.721206	1.04902	1.35118	0.96264	1.04853	1.08629	0.859351	0.938146	1.02701	1.02853	1.09332	1.0182	0.870443	1.62164	0.804126	0.86839	1.07157	1.44583	1.19124	1.13813	1.08092	0.929283	1.11732
532	chr2	72010330	72551593	0.793735	0.843434	1.15749	0.83297	1.02623	1.07315	1.00421	1.188	1.10969	0.976537	1.25328	0.902697	1.27061	1.09544	1.36385	0.806569	0.926329	1.40648	1.27122	0.813383	0.880529	0.840896	0.885304	0.848278	0.967674	0.748853	0.919157	1.06217	0.750093	1.01974	0.93864	0.962416	0.939536	1.05899	0.939296	0.685411	1.54856	0.620788	0.942441	1.0051	1.76263	0.985896	0.847422	1.32408	0.866436	1.16873
533	chr2	72551594	73132611	0.946836	0.976392	0.97009	1.00805	0.933178	1.29418	0.917953	1.1274	0.954304	0.958476	1.28965	1.3258	1.00482	0.921394	1.17244	0.947736	1.10429	1.10145	1.00929	0.757103	0.864784	0.884837	1.03776	0.628264	1.37419	1.35414	0.874962	0.893619	0.957075	0.8518	1.12704	0.647529	0.880843	1.05546	0.81196	0.869986	1.24272	0.728347	1.06675	1.07644	1.568	1.007	0.826793	0.814672	0.877746	1.79449
534	chr2	73132612	73679991	0.999224	0.942384	0.942567	0.930655	0.946763	0.867859	0.939496	1.09405	1.04651	1.01552	1.11835	1.05882	0.628802	1.34384	1.46086	0.942111	1.04809	1.14188	1.28263	1.03372	0.893185	0.918674	1.68619	0.722101	1.00274	1.07377	0.964043	1.0738	1.00784	1.03677	0.979748	0.900815	0.817468	0.975437	0.969574	0.931411	0.75444	0.826907	0.658211	0.895892	1.24366	1.03685	1.18974	1.3033	1.01993	1.14081
535	chr2	73679992	74208964	0.814287	0.861242	1.16258	0.728878	1.05041	1.39155	0.818945	0.895373	1.22767	0.98325	1.41454	0.836629	0.736157	1.02284	0.907044	0.837671	0.979326	1.11508	1.073	1.08719	0.684476	0.99725	1.22869	0.790686	1.21017	1.32166	0.834032	0.762512	1.03687	1.17457	1.05577	0.91664	0.985051	1.01538	0.941524	0.918133	2.23128	0.501326	1.25758	1.18815	2.09241	1.38014	1.07898	1.23019	0.872591	1.24662
536	chr2	74208965	74746513	0.869058	0.596138	1.06816	0.957755	0.796969	1.08261	0.907776	1.05064	0.848733	0.988198	0.823713	0.954801	0.58557	0.965468	0.785497	0.993337	1.09429	1.00103	0.791918	0.739668	0.654634	1.19792	1.21411	0.598671	0.975344	1.01737	1.23212	0.911684	0.928974	1.17945	0.85294	0.793787	1.04739	1.08326	0.971098	0.905816	1.52697	0.836287	0.798518	0.88101	1.71997	1.09204	0.649243	1.08479	0.938642	1.37899
537	chr2	74746514	75276448	0.915522	0.549291	0.972697	0.686105	1.07836	1.80296	1.08542	1.17431	1.02179	0.949085	1.09702	0.950241	0.836815	0.884576	0.849819	0.921226	0.926381	1.08985	1.02995	1.15414	0.725391	1.09132	1.55083	0.891292	0.895029	0.691778	1.12195	1.04121	1.06732	1.25879	0.682438	0.923548	1.12106	1.06912	1.11584	0.994725	1.03294	0.736739	0.861663	1.29314	1.03341	0.952975	1.17116	1.27886	0.914525	1.31396
538	chr2	75276449	75824085	0.929479	0.654372	0.915134	1.23889	0.880573	1.4905	1.09037	1.14758	1.05316	1.11549	1.06016	0.998025	0.935474	1.02364	0.867337	0.920901	1.50113	1.29097	0.866258	0.834012	0.732181	1.15339	1.0321	0.781438	1.12859	0.853013	1.2082	0.78547	1.129	1.19984	1.0714	1.03024	1.18664	1.08345	1.03818	0.918265	1.16257	0.639722	0.875712	1.11162	0.799685	1.05177	0.905462	1.28477	1.11575	1.11977
539	chr2	75824086	76420690	1.02494	0.988483	1.15154	1.153	0.922206	1.79324	1.06672	1.26712	0.99223	1.11925	1.38261	0.798424	1.02087	1.10657	0.838833	0.939683	1.41058	1.28005	0.94879	0.912056	0.864638	1.23213	1.71851	1.16333	1.16559	0.74476	0.955325	0.913938	1.21492	1.37514	1.27855	0.978772	1.136	1.04859	1.28913	0.859594	2.13645	1.08653	0.644344	0.854734	0.994146	1.08125	1.67678	1.51414	1.17032	1.2566
540	chr2	76420691	77054426	1.02875	1.00506	1.12236	0.958875	1.21751	1.73389	1.10848	1.38539	0.978219	1.10783	1.46632	1.23935	0.970986	0.898706	0.804009	0.939138	1.4648	1.10421	1.36176	1.04014	0.868815	1.46067	1.35562	1.06634	1.58172	1.20524	1.00856	0.927066	1.10981	1.68897	1.13855	0.743598	1.50875	1.08156	1.14466	1.04821	2.16424	0.932164	1.014	0.875038	0.878847	1.18821	0.957645	1.59284	0.9406	1.34772
541	chr2	77054427	77721735	0.94637	1.00546	1.0548	1.03996	1.02821	1.50755	1.10076	1.50697	0.854866	1.30236	1.40693	1.12846	1.33786	1.24978	0.910921	1.02301	1.47567	1.13097	1.0118	0.929679	0.743163	1.17754	1.12266	0.716999	0.934476	1.13304	1.17614	1.13003	1.04133	1.40208	1.08936	0.767838	1.16721	1.09314	1.04223	0.799233	1.48431	0.90176	1.25209	0.96864	1.43104	1.21244	0.999517	1.09694	1.03695	1.47779
542	chr2	77721736	78396336	0.928146	0.754562	1.07091	1.24707	0.844795	1.65602	1.1068	1.35685	1.05773	1.11042	1.32585	1.41915	1.04485	1.02465	1.09615	1.04591	1.29539	1.07622	1.10543	0.913526	0.812079	1.05057	1.34254	0.667965	1.07832	0.986472	1.18321	0.93796	0.919339	1.31256	1.32793	0.875771	0.894681	1.16433	1.08891	1.06115	2.26547	1.03792	0.90369	0.995741	0.988774	1.09521	1.40319	1.08677	1.0891	1.29135
543	chr2	78396337	79077951	1.08039	0.982005	1.20022	0.981041	1.21906	1.61255	1.14689	0.877108	1.26559	1.15033	1.31658	1.20149	1.38287	0.882138	0.945157	1.02753	1.04239	1.17665	1.21645	1.25183	0.814249	0.968165	1.48324	0.81173	1.41365	1.17927	0.859995	1.01335	1.10944	1.28359	0.955364	1.03266	1.20477	1.29469	1.32771	1.03926	1.93849	0.718937	0.947422	1.00261	0.705257	1.20489	1.06394	1.06877	1.06907	1.28066
544	chr2	79077952	79686895	1.11117	0.771846	1.16145	1.07842	1.32844	1.60728	1.09935	1.21318	0.960299	1.3299	1.3099	1.0172	1.14488	0.987838	1.15984	0.994445	1.35922	1.41799	1.19668	0.974111	1.01625	0.959076	2.09701	1.11629	1.24359	1.07671	1.06865	1.35692	1.00919	1.7428	1.0717	0.983327	1.14303	1.17525	1.24831	1.06928	2.18231	0.897651	0.944568	1.23833	0.740313	1.21675	0.825737	1.49322	1.21683	1.24694
545	chr2	79686896	80309846	0.957792	0.710357	1.12332	1.12585	1.33246	1.30356	1.18169	1.20777	1.05305	1.21036	1.34395	1.42072	0.992068	0.944197	0.984716	0.96789	1.15962	1.23807	0.8921	1.18006	0.814082	1.06928	0.675774	0.784602	1.09638	0.87675	1.19881	1.2055	0.916438	1.80694	0.984654	1.02943	1.08941	1.0969	1.09999	1.0285	1.92075	0.771618	0.703693	1.26358	1.14284	1.22067	1.05788	1.49134	0.968636	1.63232
546	chr2	80309847	80881050	1.26409	0.853448	1.07301	1.08181	0.704199	1.59509	1.16963	1.01098	1.41129	1.27985	1.21856	0.911594	0.789549	0.913703	1.00287	1.04975	1.17748	1.4655	1.22759	1.35377	0.817489	1.44512	1.34937	0.824631	1.0806	1.01292	1.18905	1.33668	1.19304	1.47325	0.93781	0.967918	1.26245	1.07257	1.00583	1.06489	1.78301	0.810107	0.647594	1.2691	1.07493	0.757929	1.32939	0.874946	1.13543	1.41858
547	chr2	80881051	81525673	1.027	0.915175	1.26702	0.994923	1.32646	1.385	1.15316	0.980037	0.974924	1.05635	1.15257	1.29444	0.886332	0.96584	1.04697	0.96839	1.14225	1.40528	1.00972	0.954041	0.897683	0.800258	1.20605	0.631802	1.18935	1.27814	0.954376	1.49814	1.0945	1.43962	1.0316	1.07627	1.10029	1.17644	1.264	0.903023	1.87129	0.988426	0.783983	0.948314	1.29642	1.06302	0.927521	1.19904	1.11302	1.16367
548	chr2	81525674	82188437	1.07827	1.00026	1.07089	1.24011	1.09417	2.07735	1.17901	0.996245	1.37662	1.13028	1.46079	1.31772	1.16132	1.04174	0.922857	0.825547	1.59709	1.27976	0.764169	0.979023	0.789143	0.960296	1.15939	0.731864	1.19982	1.15594	1.25112	1.0319	1.15742	1.86024	1.09228	0.94168	1.19337	1.0144	1.14571	0.932848	1.65749	1.02398	1.0327	1.2385	1.42091	1.10233	1.35948	1.11666	1.39101	1.0658
549	chr2	82188438	82849380	0.956164	0.89462	1.05013	1.3347	0.990755	1.4613	0.980612	0.987746	0.808523	0.984408	1.52726	1.37865	0.976179	1.04486	0.856165	0.96895	1.41814	1.25928	0.955829	0.892826	0.892544	0.93871	1.36115	0.772355	1.18978	0.951948	1.15113	0.800543	1.04486	1.56725	1.19404	0.834482	0.946692	1.0866	1.16952	1.08885	1.78538	0.896162	0.843493	0.846957	1.18825	0.875905	1.13385	0.844823	0.96954	1.73257
550	chr2	82849381	83522916	0.918867	0.913574	1.25174	0.807974	1.22588	1.77443	1.28422	1.16564	0.85518	1.06028	1.20974	1.13263	0.853501	0.947363	1.05814	0.900822	1.73449	1.07122	0.932184	0.864645	0.954148	0.844917	1.55892	0.841933	1.06989	0.880855	0.961196	0.933249	1.2405	1.46153	1.17319	1.08725	0.84477	1.15633	0.781339	0.963368	1.7591	0.882694	0.726026	0.88356	1.17564	0.889143	1.58853	1.11214	0.777733	1.15069
551	chr2	83522917	84187079	1.1329	0.888379	1.02171	0.910554	1.27517	1.61167	1.03696	1.38591	1.05925	1.12512	1.53045	1.24335	1.01375	1.29517	1.0587	0.9611	1.6085	1.10427	0.989436	0.982344	0.840215	0.592923	1.39239	0.767865	0.961723	0.958794	0.877735	1.21593	1.22707	1.91449	0.982819	1.22611	0.847589	1.10494	1.39109	0.890468	1.56436	0.997669	0.852629	1.09645	1.0596	1.03277	1.17888	0.494268	1.08774	1.53984
552	chr2	84187080	84773604	1.05582	0.819172	1.15551	0.834952	1.00461	1.49457	1.08113	1.1895	1.56102	1.00611	1.43108	0.889273	1.04367	1.12097	1.0823	0.998098	1.37136	1.21868	0.941496	0.89636	0.873482	1.12305	1.54564	0.682432	0.843519	1.20926	1.05391	1.05977	1.0552	1.64452	1.0549	1.02759	1.09653	1.06815	1.05658	0.962344	1.18719	0.903724	1.06508	1.00783	0.702887	1.05476	1.05581	0.658402	1.40715	1.04059
553	chr2	84773605	85341617	1.09736	0.912471	0.683916	0.957023	1.17093	1.7454	1.03284	0.825807	0.937141	1.09589	0.869101	0.608596	1.22586	0.845565	0.69564	1.0092	0.77903	1.32396	0.881097	0.882817	0.841356	0.999693	1.19818	0.830298	1.30832	1.03494	1.03132	1.10248	0.902556	1.54448	0.861786	0.839121	1.24187	1.05035	1.09416	0.84074	1.06505	0.673163	0.875865	1.23958	1.20757	0.944962	1.57001	1.24624	0.981415	1.34736
554	chr2	85341618	85881287	1.1588	0.926174	1.20564	1.08004	0.877517	1.22348	0.98623	1.29404	1.10192	1.23044	1.26625	0.93766	0.883976	0.962954	0.81739	0.952555	0.989146	1.07472	1.10753	1.00623	0.849432	1.14039	1.43303	0.813775	1.01772	0.870564	0.922466	1.28742	0.991973	1.11907	1.03215	1.01879	0.737054	1.09075	0.824905	0.890519	0.939244	0.652827	0.768998	1.00035	1.73769	0.973892	1.32426	1.16792	1.10039	1.35556
555	chr2	85881288	86385617	1.19753	0.742678	1.14857	0.840365	1.26165	2.07277	1.07424	0.859806	1.06822	0.978147	1.23808	1.1105	0.957281	0.975676	0.660888	0.991984	1.14328	1.07592	1.03335	1.00546	0.766162	0.937458	0.703434	0.796949	1.0712	0.872003	0.886805	0.817333	1.26426	1.30254	1.09654	0.879709	1.1338	0.963402	0.863754	0.954635	1.46704	0.833786	0.925593	1.06464	1.72631	0.970874	1.03476	1.06573	1.34938	1.06676
556	chr2	86385618	86952224	0.901149	0.874821	1.20643	1.10305	0.941091	1.82667	0.972726	0.689927	0.628916	1.17818	1.1522	1.20774	0.916147	1.08757	0.837026	0.993865	1.16105	1.05232	1.28056	0.817686	0.936569	0.988146	1.35477	0.676673	1.22728	0.945517	1.20038	1.14816	1.09472	1.47657	0.973015	0.913152	0.923668	1.102	1.04069	1.02398	1.58073	1.03067	0.638084	1.17511	1.41836	1.09959	0.75178	1.14314	0.978563	1.07059
557	chr2	86952225	87406383	1.14711	0.927815	1.46364	1.17585	1.32803	1.47514	1.21853	1.38401	1.09507	1.26062	1.20301	1.07649	1.05658	1.09199	1.14431	1.04547	1.2072	1.16948	0.866398	1.20081	0.862581	0.906085	1.0332	0.729225	1.15638	1.2395	1.18596	0.8427	0.975467	1.46257	0.875897	1.15835	1.06945	1.28235	1.13933	1.14148	1.57432	0.867749	1.33383	0.9989	0.991357	1.20456	1.01443	0.662262	1.43347	1.32872
558	chr2	87406384	87856190	1.0354	0.826107	1.27895	0.745776	1.18561	1.5943	1.22	1.12274	1.36128	1.19495	0.928953	0.837284	1.30927	1.15399	0.88015	1.04246	1.03807	1.41798	1.2328	1.15425	0.883961	1.1558	1.01824	0.905706	0.996227	1.12816	0.994889	0.927121	1.22655	1.24147	0.97468	0.778294	1.06342	0.984016	1.16708	0.74464	1.24564	0.674353	1.01982	1.19609	1.46417	0.995467	1.25409	1.27618	0.985121	1.28958
559	chr2	87856191	88313313	1.04869	0.961376	1.09583	0.937597	1.19817	1.47147	1.23647	1.33353	1.20571	1.17823	1.16843	1.22038	1.13188	1.14853	1.31896	1.03067	1.22069	1.2231	1.04792	0.910741	0.95932	1.03102	1.65069	0.94719	1.14398	0.917261	1.1503	1.00284	1.18893	1.64402	0.924837	1.34626	1.1363	1.18774	1.14138	1.08831	0.822493	0.888543	1.25499	1.1745	1.07818	1.02125	1.212	1.05488	1.34872	1.24764
560	chr2	88313314	88882051	1.00486	0.989376	1.06601	1.04017	0.95174	1.53237	0.874519	0.617662	1.44865	1.001	1.23056	0.957003	0.755335	0.729173	0.927741	1.05915	0.769521	1.23761	1.26612	1.09958	0.811418	1.14338	1.4429	0.726935	0.962655	0.676055	1.23289	1.25258	1.14594	1.1454	0.84579	0.789224	1.05256	1.08146	1.3479	0.759592	1.22506	0.852852	1.01469	0.924741	1.27135	1.00197	1.32527	0.98052	1.0304	0.967365
561	chr2	88882052	89438130	0.961993	0.798445	1.52651	1.0652	0.803125	1.13462	1.15164	0.784532	1.10824	1.02976	1.09179	0.851991	0.915626	1.04425	1.06075	1.0232	1.12578	1.2415	0.827915	1.14922	0.862314	1.1468	1.63368	0.713566	0.939233	1.1652	1.11416	1.04211	0.740061	1.77038	0.979026	1.00261	1.07306	1.08469	1.06238	0.906283	0.978022	1.2741	1.06824	0.96097	1.14249	1.18719	0.851994	0.837353	1.11818	0.501869
562	chr2	89438131	90043760	0.850167	0.759334	1.03842	0.846901	1.13151	1.11627	1.14667	0.585685	0.698688	0.790991	1.12609	0.9574	1.0004	0.691155	1.14765	0.969718	0.631938	1.23372	1.07466	0.767181	0.837091	0.779586	1.06042	0.835896	0.957817	1.11174	1.25785	0.721047	1.02346	1.44097	0.844936	0.666107	0.952179	1.19857	1.20071	1.0671	1.52873	0.602222	0.741526	0.692683	0.82931	0.933922	0.67002	1.24105	1.20068	0.628229
563	chr2	90043761	90396700	0.852847	0.925214	1.08697	0.70459	0.765628	1.57546	0.843627	0.507239	0.856743	0.81963	0.867413	0.442869	0.872892	1.01384	0.751369	0.909549	0.981131	1.22042	0.764218	0.881038	0.822415	0.703208	1.22667	0.72341	1.10764	0.694818	1.14899	0.986563	0.901691	1.16445	0.889376	0.714315	1.00437	1.06885	0.863693	0.90607	0.9314	0.939605	0.793459	0.695107	1.18174	0.919848	0.581415	0.754742	0.905096	0.792557
564	chr2	90396701	91623196	0.935452	0.986023	0.881967	0.934293	1.0643	1.05426	0.919119	0.842424	0.861823	1.04377	0.927076	0.970147	0.830194	0.970025	1.11317	1.04749	1.00927	1.10784	1.23864	1.1291	0.783224	0.986117	0.924794	0.622548	1.05391	0.797263	0.860308	0.955748	1.05303	1.195	0.970525	0.957328	1.39425	1.09212	0.894137	0.936409	1.00474	0.763835	0.826234	0.80097	0.803262	0.895656	1.11552	1.19446	0.829796	0.507085
565	chr2	91623197	91788929	0.849561	0.93354	1.12262	0.909962	1.03651	0.840246	1.10448	1.09601	0.96204	1.041	0.860393	0.899642	1.06792	0.904512	0.887937	0.938994	0.978887	0.913519	0.971683	1.23118	0.936618	1.007	0.90962	1.11149	1.18962	0.805839	0.944438	1.23246	1.05572	1.07889	0.830706	0.781376	1.02368	0.926254	0.827209	0.885467	0.614834	0.744636	0.816014	1.32959	0.956114	0.760784	1.06704	0.992173	0.800585	0.734983
566	chr2	91788930	91950622	0.953076	0.737316	1.02457	1.01797	0.88241	1.26153	1.07192	1.0066	1.44557	1.06574	1.0709	0.693107	0.850223	0.90284	0.929911	0.988361	0.588323	0.969023	1.06659	0.864754	0.789468	1.10205	1.12872	1.00289	0.865078	0.842197	1.03648	0.869399	0.872104	1.18779	1.04095	0.815144	1.11158	1.00315	1.05046	0.877467	0.708044	0.740375	0.887773	1.14846	1.29712	0.854561	1.07188	0.943678	1.04864	0.749344
567	chr2	91950623	92266805	1.0761	1.1941	1.60631	0.94045	1.1183	1.40354	1.26671	1.11127	0.696952	1.17054	1.29664	0.976187	1.15256	1.09142	1.01963	1.05339	1.2361	1.37423	1.14808	0.935552	1.05548	0.887717	0.899554	0.711966	0.987649	1.40503	1.51025	1.09477	1.12583	1.15341	0.821287	0.95205	1.11095	1.16704	1.33239	1.33034	1.3172	0.971592	0.910006	0.73123	1.07428	0.867678	0.937785	1.38687	0.961882	0.713008
568	chr2	92266806	92313616	1.6118	1.49443	0.906873	1.3606	0.952023	2.9124	0.396207	1.36822	1.34119	0.810646	2.04283	0.872392	1.40907	1.09561	2.26032	1.84679	0.663659	1.73259	1.8251	1.02429	1.08231	1.74889	2.39507	1.36082	1.65932	1.66883	1.21211	1.14464	1.15246	2.23339	1.84878	1.03001	2.24158	1.78861	1.11103	1.75224	1.75846	1.20544	1.70773	1.33293	1.23144	2.22355	1.28925	1.40241	1.73029	0.179036
569	chr2	92313617	95480405	1.38677	1.23823	1.13465	1.37724	1.27957	3.40239	0.783984	1.2192	1.32418	1.08582	1.62593	1.31514	1.20353	1.38542	1.7283	1.68905	0.725341	1.66913	1.60676	1.1164	1.04393	1.58351	2.51743	1.42486	1.54476	1.80043	1.25723	1.73709	1.25677	1.90854	1.46928	1.49406	2.00636	1.58201	1.15539	1.55052	1.33281	1.21585	1.34093	1.20049	1.42903	1.49483	1.44871	1.357	1.70142	0.360433
570	chr2	95480406	96029491	0.86575	0.788599	1.07219	1.042	1.06812	1.54407	1.22184	1.13654	1.17331	0.897502	1.04447	1.17075	1.17514	0.977191	0.888025	0.940789	0.880286	1.07323	1.13216	1.00141	0.793843	1.16589	1.13046	0.888883	1.12309	1.08744	1.03738	1.11464	0.865069	1.33515	0.993491	1.09428	1.12798	1.16124	1.22285	0.887668	2.1751	0.768158	0.834768	0.782119	1.17944	0.962697	1.32752	1.17915	0.785462	1.10384
571	chr2	96029492	96477519	0.936632	1.10747	0.915104	1.44557	0.992724	1.52185	1.37981	0.975397	1.01936	0.992889	0.920492	0.743831	1.06649	1.07243	0.897337	1.09032	0.660887	1.02201	0.808873	1.05544	0.784392	0.748419	1.09062	0.761062	0.960101	1.57277	1.06769	1.33789	1.06271	1.25927	1.17874	0.832908	0.726839	0.976312	1.19734	0.969974	1.51481	0.76959	0.901519	0.930804	1.76157	0.744319	1.21856	1.41939	0.838013	1.45634
572	chr2	96477520	97000036	1.01235	0.673421	1.13158	0.868326	1.34913	0.756922	1.18628	0.862017	1.13646	1.00588	1.14743	1.18459	0.689419	1.15111	0.954733	1.0256	0.861724	1.3035	0.999743	1.35721	0.917838	1.36664	0.906203	0.839582	0.747853	1.04438	0.949518	1.10781	1.23959	1.2445	0.940005	0.797511	0.643619	1.01188	1.13313	0.745204	1.57039	0.910537	1.08509	0.937332	1.89901	1.28266	1.32239	0.807263	1.3577	1.29985
573	chr2	97000037	97577219	0.996059	0.734498	0.930473	0.688588	1.10747	1.01927	0.993482	1.0635	1.22973	0.959902	1.07101	1.12391	1.17125	0.949401	1.32445	1.00602	0.921731	1.28163	1.39864	1.07803	0.771582	0.570809	1.37817	0.713466	0.988688	1.04947	1.03747	1.44551	1.02584	1.49606	1.24305	0.888108	0.727813	1.0672	1.21723	0.853888	1.11031	0.950937	0.974307	1.02257	1.98967	0.987135	1.23303	1.29419	1.03603	1.12481
574	chr2	97577220	98061464	1.01258	0.669842	0.917967	1.11051	0.648988	1.03533	1.4294	1.05452	1.08796	0.989824	0.801846	0.866488	1.2005	0.902747	1.69626	1.00475	1.08652	0.959306	0.736499	1.18172	0.812577	0.775133	1.24415	0.989981	1.09133	1.15477	1.04403	1.29456	0.921951	1.39397	0.992404	0.890792	1.00568	1.19305	0.964134	1.07188	1.32081	0.962867	0.744597	0.876252	0.888495	1.36299	1.20596	0.82017	0.963049	1.01844
575	chr2	98061465	98574590	0.984075	0.921104	0.988415	0.737928	1.05992	1.15869	1.02254	1.04006	0.982737	1.06994	1.03667	0.863949	1.23147	0.842314	1.25706	1.01088	0.945641	0.911658	1.16568	1.11136	0.799313	0.795785	1.05702	0.937085	0.995509	1.27809	1.2914	1.24181	0.863132	1.07554	1.17235	0.833965	0.776281	1.20533	1.17614	0.944751	0.81843	0.845909	0.750646	0.991291	0.535174	1.24747	1.0496	0.851532	1.1977	1.09119
576	chr2	98574591	99123023	1.0059	0.832066	1.1431	1.22226	1.02367	1.34817	1.10882	1.28298	1.29949	1.1294	1.33624	1.14875	0.911015	0.995454	1.00237	1.1079	1.00511	1.36116	1.15636	1.2204	0.862882	0.873332	0.868053	0.611342	1.04643	1.50649	0.797598	0.915758	0.863691	1.2579	1.30327	0.799506	1.38184	1.02949	1.01651	0.914702	0.574815	0.888261	0.783732	0.995811	1.08732	1.08871	1.19453	0.714356	1.10618	1.28378
577	chr2	99123024	99669347	1.08586	0.857225	0.970327	0.967051	1.05712	1.15232	1.18882	0.785067	1.16077	0.884806	1.14089	0.846947	0.709257	1.18948	0.966051	1.05046	1.18948	1.06603	0.84822	0.907103	1.07948	0.650596	0.763297	0.745858	1.14521	1.1435	0.982665	0.944078	1.00735	1.38831	1.08698	1.00567	0.981112	1.12344	0.78919	0.850106	0.611866	0.64903	0.986761	1.04202	0.515209	1.00353	0.904534	0.95092	1.40205	1.15351
578	chr2	99669348	100247789	0.951768	0.91122	1.08452	1.17353	0.922225	0.999766	1.00604	1.15154	1.17595	1.02301	1.47076	1.31593	0.891691	0.837405	0.896677	1.02098	1.34151	0.845913	1.14522	0.968058	1.16945	1.25886	0.844095	0.720428	0.91477	1.44001	1.17786	1.15232	0.902342	1.26449	1.07113	0.9738	0.898744	0.99994	0.783117	0.853807	0.867003	0.688999	0.987442	0.69482	0.430029	1.11278	1.31232	1.06767	1.05579	1.12339
579	chr2	100247790	100790488	0.788556	0.912794	1.0454	0.789318	1.02181	1.08791	1.22861	1.0153	1.53354	0.984623	1.37215	0.97685	0.954572	1.08445	0.962881	1.01491	1.25104	0.87912	1.15968	0.995394	0.810192	0.964705	0.930799	0.949249	1.16837	1.6013	0.891244	1.1498	1.10173	1.37653	1.2257	1.04411	0.95912	1.07474	1.05155	0.882334	0.956472	0.856487	1.00366	1.07803	0.77389	1.0517	1.72302	1.33829	1.11948	1.37919
580	chr2	100790489	101323799	1.04615	0.942397	1.06427	0.740436	0.920449	1.2608	1.15692	0.873502	0.879347	1.02491	1.32703	1.05608	1.3405	0.963818	0.962384	0.931398	1.11178	1.11081	0.80841	1.1388	0.84184	0.814618	0.958776	0.626265	0.920283	1.09909	0.978248	0.95287	1.02771	1.22513	1.02992	0.82863	0.976883	1.1276	1.1435	0.858349	0.679819	0.610664	0.966308	1.17023	0.856375	1.09873	1.32349	1.51257	1.29895	1.20056
581	chr2	101323800	101861752	1.18124	0.808086	1.26307	1.02069	0.765468	1.03719	1.17263	1.41854	1.1713	0.862649	1.09733	1.07211	1.09521	0.909118	1.09622	0.886979	1.00531	0.801059	1.09146	1.20369	1.03288	1.33587	1.18871	0.870583	0.9135	1.46185	1.18559	1.28578	0.938288	1.20489	0.962999	0.846615	0.694244	1.07956	1.07844	0.869815	0.771974	0.888895	0.733184	0.850525	1.43102	0.959029	0.974238	1.46232	0.967654	1.4567
582	chr2	101861753	102414623	0.73186	0.704061	0.998165	1.1036	0.909412	1.05979	1.13932	1.15156	1.54444	1.13771	0.992536	1.08345	1.20918	0.989085	1.01385	0.927891	1.36559	0.938108	0.926507	0.830444	0.8904	1.30501	1.2717	0.793135	1.32728	1.29858	0.910283	1.18145	1.09591	1.21638	1.17072	1.01559	1.06311	1.0583	1.1588	0.938748	1.15706	0.888617	0.828959	0.947657	1.1651	1.0724	1.46336	1.17001	1.0486	1.17313
583	chr2	102414624	102934720	0.953441	0.909096	0.979774	0.773057	0.948823	0.995156	1.12187	0.933994	1.32766	1.25398	1.10476	1.08126	0.848106	0.929936	0.899009	0.976082	1.4419	0.916339	1.15158	0.995116	0.732104	1.45936	1.31882	0.791482	0.89219	0.909224	1.0599	1.10046	1.01499	1.42588	0.99422	0.886105	0.922308	1.03956	0.907818	0.984785	0.388701	0.991114	0.746652	0.804756	0.897578	1.11243	1.42948	1.32479	1.02223	1.25104
584	chr2	102934721	103521338	0.943294	0.899477	1.01889	1.12035	0.9921	1.02534	1.22868	0.987662	1.42675	1.00144	1.53011	1.00313	1.19345	1.06987	0.93907	0.915971	1.3258	1.1313	0.857857	0.651797	0.918213	1.12268	1.19202	0.777349	1.03185	1.40671	1.06895	1.15878	1.21338	1.39989	1.21814	0.998294	0.98477	1.09438	1.14989	0.996942	0.568385	0.810076	0.73189	1.01259	1.30545	1.29357	1.21675	0.877365	1.12036	1.12559
585	chr2	103521339	104118937	1.07387	0.850988	1.09252	1.02532	0.947856	1.58538	1.03311	1.24423	1.01279	1.29926	1.53954	0.835641	1.21245	0.960059	0.752888	0.890039	1.37551	1.02985	1.26201	1.20412	0.933399	1.46067	1.59974	0.717243	1.33627	1.23239	1.12373	0.978018	1.02781	1.39105	1.26935	1.00429	1.02081	1.13036	1.38138	1.06678	0.391476	0.671316	0.843676	0.914676	1.61155	0.960259	0.796215	1.22599	1.26649	0.950308
586	chr2	104118938	104756436	0.898856	0.866574	0.929806	1.13519	0.963231	1.16582	1.12823	1.06835	1.2421	1.20678	1.40113	0.896218	0.913363	0.939912	1.10184	1.06121	1.0274	0.951143	0.96253	0.860379	0.925658	1.00919	1.62432	0.761994	1.14804	1.29741	1.27367	1.05078	0.920563	1.7462	1.11649	1.2066	1.07176	1.15366	1.29707	0.851043	0.412601	0.834042	1.09674	0.996385	1.52349	1.2492	1.13247	1.11648	1.38011	0.710954
587	chr2	104756437	105343470	1.07268	0.947308	1.00688	0.967319	1.02757	1.65628	0.928454	1.18185	1.08044	1.32555	1.02182	1.27175	1.24028	1.32933	1.63828	1.03055	1.37807	1.01532	0.916859	1.17462	0.940326	0.734095	1.37426	0.986493	1.24844	1.27553	1.1068	1.10518	0.958129	1.73275	1.12849	1.10554	1.03475	1.19288	1.35923	0.942673	0.465814	1.00233	0.813366	1.35483	1.41481	1.09603	1.171	1.41671	1.15765	0.75851
588	chr2	105343471	105904978	1.07664	0.833585	1.21347	1.30862	1.10542	1.44682	1.06298	0.855158	1.20747	1.39248	1.15887	0.994254	1.09193	1.22469	1.24438	0.998714	0.968667	1.0592	1.04077	1.24617	0.78856	0.986255	1.44724	0.801067	1.1652	0.856789	0.949052	0.91385	1.10521	1.55904	1.19561	1.06071	1.40365	0.964247	1.04251	1.07396	0.568714	0.723662	1.01467	1.00934	1.05051	1.09987	1.11374	1.34496	1.14282	1.19926
589	chr2	105904979	106425772	0.992506	0.87912	0.962211	1.2835	0.905093	1.35498	0.989985	1.12003	1.09843	0.981041	1.12572	0.885807	0.881612	1.09993	0.908691	0.890666	1.04366	1.03299	0.828992	1.00863	0.885174	1.17345	1.03642	0.684794	0.980172	1.23933	1.0385	1.33521	1.07169	1.38757	0.984899	0.900886	0.78925	1.03897	0.982049	0.861682	0.643201	0.881876	0.867239	1.00095	0.98023	0.925942	1.5577	1.20169	1.16457	1.0147
590	chr2	106425773	106988521	1.1989	0.969205	1.00132	0.752545	0.860838	1.3887	1.09507	0.807769	1.10557	0.978904	1.07812	1.18828	0.918717	1.03857	1.12501	0.9666	0.798548	0.789447	1.32888	0.920156	0.934705	1.15083	1.378	1.05439	0.709196	0.888284	1.01118	1.23373	1.19742	1.26664	0.963423	1.26516	1.08251	1.13557	1.07946	0.94237	0.872823	0.93768	1.00986	1.01467	0.854646	1.0353	1.65294	1.21792	0.934909	0.938129
591	chr2	106988522	107521543	1.02562	1.15575	0.880729	1.00335	1.01569	0.930157	1.13085	1.04393	1.12739	1.06411	1.35147	1.1448	0.697188	1.32352	1.13596	1.01748	0.999093	0.912583	1.30317	0.800682	1.07695	0.773898	1.38627	1.13748	1.11783	0.974804	1.19411	0.992315	0.964921	1.73763	1.05728	0.882684	1.03543	1.12514	0.979238	1.02928	1.01986	0.864125	1.03199	1.12137	1.10692	1.40916	1.28539	0.967552	1.26456	1.00295
592	chr2	107521544	108131095	1.26783	1.11948	1.10993	1.30577	1.2212	1.12066	1.1181	1.01779	0.773002	1.20057	1.30081	0.78564	1.07466	1.44283	0.954758	1.06539	0.252785	1.07129	1.03631	1.21887	1.00152	0.846073	1.29518	1.16306	0.955552	1.03549	1.12581	1.54297	0.819954	1.61624	0.866467	1.0381	1.11174	1.08056	0.991877	1.02644	0.563761	0.665214	1.20435	1.12045	0.940524	1.43582	1.20795	1.36459	1.13127	0.924484
593	chr2	108131096	108701676	1.133	1.02431	1.25303	0.90575	0.996213	0.833933	1.26779	1.21184	1.22491	1.13428	1.50116	1.05101	0.887403	1.25899	1.16879	1.02457	0.78962	1.07986	1.05684	1.14844	0.868727	0.704719	1.27314	1.39372	1.02894	1.03477	1.1929	0.608979	1.06816	1.7229	0.808247	0.869642	0.909704	1.1662	1.00208	1.12827	0.594997	1.01471	1.18308	1.08424	0.25427	1.33654	1.16058	0.861026	1.06096	1.03903
594	chr2	108701677	109295413	1.02918	1.10589	1.11823	0.85458	0.891545	0.534695	1.24601	1.06713	1.18637	1.04426	1.19726	0.94528	0.847753	1.0859	1.48159	0.857316	1.0354	1.05698	0.772535	1.15833	1.01249	0.459705	1.70915	1.13369	1.12042	1.04864	1.21769	1.04508	1.03115	1.70587	1.19017	1.07862	1.07504	1.18319	1.08599	0.980089	1.22157	0.949333	1.20978	0.889615	0.796864	1.59746	1.35781	1.58261	1.05723	1.15122
595	chr2	109295414	109834054	1.06665	1.0617	0.955431	0.964802	1.04861	0.81053	1.10896	1.07367	0.940684	1.00222	1.11217	1.10735	0.784691	0.987915	1.50963	1.01764	1.12416	0.863964	1.02532	0.86327	0.963494	0.757767	1.0694	1.02887	1.16247	0.98428	0.938024	1.14343	0.939309	1.35434	0.750732	0.947005	1.15448	0.958063	1.17814	0.821821	0.453217	0.810072	0.987788	0.928749	1.34987	1.40306	1.32346	1.47891	0.984054	1.08973
596	chr2	109834055	110478999	1.24619	0.919955	1.14753	0.748243	0.906928	0.811339	1.05614	0.771191	0.935808	1.17485	1.30628	1.10966	0.931792	1.33247	1.87915	0.953479	0.571247	1.11499	0.996891	1.24433	0.877599	1.01827	1.25879	1.22769	0.974861	1.27132	0.919922	1.12835	0.964921	1.19839	1.06825	1.14124	1.09539	1.06988	1.20252	0.870322	0.614076	1.15042	1.53805	1.05034	1.20298	1.58637	1.43875	1.12334	1.21768	1.13862
597	chr2	110479000	110854524	1.05815	1.08931	1.16109	0.664018	0.964241	0.932913	1.21822	1.21903	1.0855	1.12317	1.43161	1.36013	1.09636	0.941306	1.19168	1.12804	0.991963	1.00896	0.932463	1.15482	1.09636	0.947327	0.96766	0.963442	1.39579	1.4143	1.18321	1.02124	1.09818	1.75381	0.906974	0.986355	0.953427	1.14727	1.04464	0.931952	0.776075	0.886551	1.41736	0.829956	1.70664	1.18166	1.27119	1.38358	0.974061	1.30441
598	chr2	110854525	111276346	1.12925	1.22128	1.13708	0.686321	0.930132	0.818751	1.23009	0.824149	0.880844	1.10437	1.22791	1.12375	1.38728	1.01323	0.987991	1.00464	0.943908	0.952246	0.694476	1.01083	0.850027	0.817935	1.00425	1.17354	1.0656	1.51274	0.983376	1.04253	1.04319	1.7194	0.812967	1.00164	1.21463	1.29697	1.07893	0.995016	0.711576	0.961957	1.2881	0.922123	1.39287	1.36473	1.14383	1.35174	1.32515	1.17495
599	chr2	111276347	111741156	1.19473	1.06448	0.878269	1.4083	0.925498	0.921238	1.17107	1.23601	1.20323	1.18733	1.63486	1.20187	0.877286	0.883314	1.27751	1.09656	1.10876	0.97669	0.981618	1.15629	1.04633	1.0635	1.03971	1.02278	1.10444	1.09522	1.01271	1.0529	1.30802	1.84147	0.856261	0.98532	0.805998	0.992763	0.859567	1.0541	0.513484	0.720971	1.65776	0.958524	1.28855	1.22448	1.33335	1.09789	0.964318	1.02418
600	chr2	111741157	112186360	1.06809	1.12419	0.838849	1.02564	0.937948	1.10969	1.15334	0.794766	1.18549	1.09273	1.03661	1.05439	1.00892	0.699256	1.11805	0.900714	1.06137	1.17843	0.85175	0.983258	0.918523	0.994169	0.703057	0.7786	1.08013	0.625141	1.02613	0.847973	1.03654	1.42367	0.816345	0.989402	0.768253	1.06388	0.920766	0.848941	0.647765	1.16747	1.05276	0.981104	1.49529	1.09475	0.862998	1.13103	1.37194	0.90182
601	chr2	112186361	112604089	0.936018	1.2665	1.04694	0.863178	1.11294	0.980661	1.27347	1.02789	1.00188	1.06	1.22259	1.02013	0.982089	1.07741	0.962458	0.920807	1.20461	0.986625	1.06998	1.17234	0.867733	0.907261	0.671998	0.830174	0.825233	1.36658	0.947267	0.935241	1.06683	1.37593	0.857551	0.953826	0.949736	1.00978	0.977312	0.744623	0.645856	0.837772	1.01171	1.03411	1.40353	1.11373	1.01806	1.18178	1.0121	1.33016
602	chr2	112604090	113146234	1.01086	0.969865	0.801046	0.974621	1.03056	0.839796	1.12836	0.867234	1.11369	1.0033	1.03777	1.03454	0.978854	0.875376	1.09703	0.875352	1.05054	0.714549	0.880056	1.13098	1.02925	1.17474	1.07382	0.722876	1.086	0.801754	1.14637	0.872885	1.02077	1.34294	0.919543	0.95754	0.880607	1.01895	0.884948	0.785332	0.793699	0.850631	1.08258	0.870284	1.06129	1.08061	0.879301	1.17151	0.995701	1.31436
603	chr2	113146235	113659427	1.00385	0.99983	0.640046	1.15078	0.92846	0.595717	0.929001	1.05854	1.10033	1.09402	0.875206	0.920836	1.17186	0.828414	0.969119	0.962024	0.563853	0.961129	0.889358	1.11721	0.887588	0.974954	1.12706	1.12304	0.866455	0.940752	0.940678	1.10315	0.970773	1.55165	0.852535	1.09338	1.11362	1.05424	0.842043	0.772545	0.579679	0.726837	0.908414	1.03671	1.36547	1.07286	0.89277	1.23859	1.04909	0.653952
604	chr2	113659428	114189445	1.04011	0.999127	0.934722	1.07654	1.03783	1.03901	0.960248	1.06255	0.973965	1.09611	1.35058	0.898649	1.00767	0.976737	1.0562	0.921088	0.67147	1.13792	1.18539	1.25657	0.993802	0.890148	1.48932	0.90263	1.11318	1.14487	1.2424	1.04492	0.871933	1.62071	0.863224	0.994315	1.06858	1.11269	0.980797	0.808373	0.297989	0.738062	1.13849	1.0505	0.951933	0.926142	1.50185	1.26024	1.19132	1.03386
605	chr2	114189446	114666637	0.992548	0.861217	0.881873	0.830974	1.06847	0.967669	1.13247	0.888193	0.927377	1.00555	0.980879	1.20303	1.02455	1.04168	1.06968	1.00447	1.18304	0.922145	0.91662	0.910845	0.893201	0.793276	1.38477	0.695128	1.06585	1.23617	1.09574	0.701157	1.06073	1.11218	0.892482	1.03911	0.942643	0.938695	1.0988	0.98615	0.674966	0.899114	1.04124	0.875558	0.789452	1.14767	1.13145	0.883288	1.22052	1.08594
606	chr2	114666638	115234424	1.08903	1.09838	0.861563	0.939887	0.859525	0.859625	0.922836	0.932566	0.821122	1.20825	1.46035	0.993105	1.20592	1.18339	0.977677	1.0547	0.548864	0.796905	0.818781	1.20703	0.975997	1.08558	0.921711	1.30754	1.29979	1.05432	0.968213	1.17389	1.16528	1.75991	0.958561	1.00846	0.966392	1.05877	0.830294	0.88403	1.24079	1.00624	1.34433	1.23861	0.943582	1.29097	1.17526	0.944393	1.07153	0.958053
607	chr2	115234425	115839906	1.11275	1.08005	1.31949	1.08552	0.945692	0.911333	0.991298	1.25527	0.855382	1.22863	1.14861	1.04214	1.00155	1.32513	0.922058	0.992276	0.746755	0.885335	0.989846	0.98012	0.943969	1.14388	1.48491	0.937371	1.06479	1.09598	0.997461	1.07454	1.17758	1.37737	0.846165	1.05705	0.89504	1.09057	0.922384	1.00927	0.730389	0.971658	1.20125	0.953703	1.08526	1.3011	1.20426	1.35891	1.34399	0.873795
608	chr2	115839907	116509997	1.19474	1.35661	1.01134	1.28347	0.96586	0.9455	0.950858	1.16494	1.15494	1.12036	1.24775	1.20467	1.01942	1.06534	0.921863	1.06229	0.751898	0.829461	1.21679	0.937987	0.964789	1.0651	1.44691	1.46101	1.19388	1.33329	1.21622	1.8617	1.21764	1.50788	0.855836	0.981776	0.997661	1.18948	1.05058	1.05441	0.423922	1.12973	1.37656	0.883855	1.35318	1.39611	1.06502	1.10903	1.09585	0.935513
609	chr2	116509998	117203011	1.02668	1.36312	1.26136	0.833773	0.9835	1.22438	0.886439	0.984967	0.849875	1.26097	1.15182	0.882292	0.903392	0.967312	1.0669	1.0317	0.646226	1.21254	1.15354	0.995528	1.08742	1.2803	1.32043	1.39107	1.33563	1.1783	1.04528	1.12261	0.978535	1.28365	0.974995	1.02147	1.07257	1.21352	1.15685	1.07268	0.843374	0.740529	1.37389	0.928164	1.5403	1.36723	1.10743	0.919958	0.984989	1.04211
610	chr2	117203012	117858169	1.0052	1.2134	1.03967	0.921912	1.0311	1.02029	0.857345	0.990789	1.01844	1.24434	1.17964	0.845963	1.07312	0.842986	0.974787	1.12664	0.633957	0.954599	0.939739	1.21088	0.98796	0.988867	1.0606	1.51522	0.780859	1.21852	0.933586	1.36013	0.976474	1.27261	0.860859	0.971989	1.23505	1.1565	1.20646	1.0258	0.398851	0.963497	1.28683	0.856265	1.42531	1.12811	0.943028	1.1981	1.0851	0.950227
611	chr2	117858170	118475096	0.902502	1.34196	1.14191	1.07429	1.1527	0.811771	1.11146	0.879304	1.16826	0.993594	1.23295	1.02674	0.918462	1.17334	0.970957	0.950832	0.671119	0.921793	1.15851	1.16568	0.920132	0.792729	1.29222	1.26947	0.955427	1.30944	1.00527	1.13673	1.13019	1.09348	0.917189	0.78546	1.51621	1.10376	1.07738	0.848408	0.688924	0.991259	1.02245	1.13742	1.13157	1.25933	1.49218	0.890876	0.92169	0.961867
612	chr2	118475097	119034876	1.05494	1.43306	0.987763	1.08917	1.1531	1.09588	1.0718	0.970967	1.35374	1.04562	1.30014	1.13536	0.89224	0.875044	0.971643	0.886972	1.04187	0.867361	1.10282	0.977324	0.810903	1.45629	1.42872	1.09134	1.04957	1.38856	1.08837	1.01298	1.19802	1.21134	0.924743	0.912042	1.28954	1.07071	1.02339	0.905154	0.185166	0.826766	1.31238	1.01358	1.37585	1.29318	0.987916	1.09763	1.24653	0.493307
613	chr2	119034877	119557976	1.18577	1.29736	0.848336	1.14927	0.910145	0.706191	1.0608	0.938773	0.958655	1.13189	0.996437	0.909574	1.06564	0.905377	0.676389	0.946862	0.274023	1.1526	0.90133	0.880676	0.857274	0.979636	1.00118	1.50675	1.0358	1.11323	0.860014	1.14396	0.849234	1.28501	0.889095	1.08924	1.0743	1.16059	1.05997	0.830789	0.562373	0.751605	1.13363	1.02216	1.00851	1.07111	1.44313	1.3125	0.908099	0.778963
614	chr2	119557977	120108122	0.98599	1.24448	0.80444	0.822583	1.01541	0.633058	0.942741	0.983861	1.04965	1.06754	1.20334	0.844777	1.1984	0.774083	1.03104	1.16987	0.78983	0.948724	1.00297	0.963314	0.890198	1.10584	1.31085	1.33684	0.855675	1.074	0.973915	0.911089	0.834896	1.23501	0.718057	0.826337	1.19706	1.00663	1.23183	0.925681	0.564561	0.894769	1.128	1.09512	1.41269	1.20352	1.36677	0.804096	0.972089	1.04557
615	chr2	120108123	120666063	1.05684	1.26641	1.13292	0.888611	1.01407	0.87966	0.767224	1.00852	1.38373	0.935625	1.2663	1.0721	1.12394	1.05928	1.18019	1.00476	0.641517	1.01811	1.04218	1.12892	0.986069	1.06282	1.14024	1.26643	1.05009	1.73294	1.30337	1.14728	1.11824	1.25861	0.83357	1.20971	1.43938	1.20908	1.06677	1.03022	0.481325	0.93999	1.20356	1.35272	2.3182	1.56287	1.10397	1.13938	1.1376	1.009
616	chr2	120666064	121234086	1.08609	1.25563	1.119	0.970256	0.968519	1.0458	0.825569	0.769903	0.865966	0.927842	1.06459	0.985068	0.893782	0.926389	1.02307	0.974964	0.830447	1.24573	0.855748	0.891213	0.924141	1.24967	1.01463	0.966052	0.870266	1.23081	1.01976	0.936767	0.947485	1.27507	0.757134	1.0369	0.809462	1.03289	1.16275	0.950965	0.579355	0.965954	1.5609	0.745554	1.57712	1.23059	1.00759	0.820398	0.807658	0.893128
617	chr2	121234087	121725967	0.917222	1.33644	1.23761	0.967512	1.06123	1.46336	1.1207	0.954584	1.20321	0.975182	1.20077	0.78683	0.802197	1.03857	1.19214	1.15095	0.703507	1.02076	1.12913	0.908434	0.95718	0.994776	1.04735	1.24912	1.23288	1.24399	1.18524	1.33636	1.01417	1.00172	0.957559	1.0401	1.09974	1.23868	1.21277	0.940903	0.619556	0.711356	1.1137	1.16465	1.61353	1.30242	1.20438	1.17786	1.58588	1.02616
618	chr2	121725968	122244604	1.03787	1.08904	1.10229	1.06873	0.907437	0.9158	0.877629	1.04774	1.36128	1.13888	1.32921	0.954406	0.805356	0.983597	0.963654	1.17135	0.729779	0.763858	1.29276	0.876865	1.00231	1.41063	1.30193	1.24466	1.06027	1.05019	1.15452	0.836125	0.848363	0.808706	0.978651	1.11961	1.13311	1.02862	1.1338	1.01534	0.758618	0.892212	1.22648	0.952727	1.65198	1.00811	1.16458	1.51295	0.897289	1.51227
619	chr2	122244605	122803166	0.868448	0.993582	1.18481	0.886674	0.862497	0.727237	0.707517	0.753559	1.76101	1.07647	1.25293	0.95042	0.985511	1.03727	1.34406	1.06564	0.715716	1.0471	0.833121	1.01238	1.01608	0.744754	1.37495	1.35295	1.18681	1.1511	1.06363	1.08439	1.01099	1.04152	0.699971	1.29681	0.95635	0.957865	0.941648	0.940241	0.711745	0.94793	1.35268	0.959635	1.53811	1.11792	0.96566	1.35386	1.17042	1.01016
620	chr2	122803167	123377687	1.00047	1.3852	0.933003	0.877892	1.05578	1.01942	0.717571	1.24124	1.22911	1.01703	1.27652	1.08169	1.119	0.833117	1.20227	0.975132	0.937025	1.18081	1.10443	0.80191	0.991641	0.69237	1.18528	1.07272	0.978952	1.62598	1.12747	1.11683	0.726248	1.36205	0.850876	0.932738	0.976445	1.09998	0.820383	0.883856	0.528895	0.729865	1.10672	1.11945	1.42382	1.36729	0.898951	1.14966	1.18585	1.30096
621	chr2	123377688	123998569	1.18884	1.49024	1.06537	1.03998	0.879677	0.822664	0.788505	1.2274	1.30394	1.16502	1.29607	1.124	1.00083	1.08987	1.58095	0.977735	1.19147	0.860689	1.13745	1.1066	1.10081	0.618022	1.33659	1.30891	1.19201	1.39615	1.13752	1.10756	0.947062	1.55396	0.834965	0.925619	1.17544	1.05439	1.06009	0.926073	0.883932	0.580622	1.37696	0.875548	1.53235	1.14064	1.29064	1.5043	0.973306	1.16603
622	chr2	123998570	124645714	1.0572	1.63483	1.10012	0.738633	0.959124	1.28153	0.867741	1.38924	1.0817	1.09578	1.427	1.11449	0.963827	1.3155	1.41613	0.972825	1.26405	1.0026	0.941275	0.872338	0.919127	0.910381	1.49445	1.19023	1.08075	1.2236	1.00309	1.12616	1.3772	1.3245	0.712508	1.20085	1.22994	1.02273	1.03791	1.10649	0.633776	0.895828	1.27791	1.05592	1.83311	1.30479	1.12054	1.24082	1.22734	1.27684
623	chr2	124645715	125282154	0.81366	1.10923	1.02185	0.864941	0.931937	1.21374	0.783568	1.09932	1.16314	1.44487	1.58668	1.1422	1.16325	1.04788	1.73068	1.05893	1.03839	1.07779	1.16066	1.03729	0.89963	0.473531	0.903976	1.13072	1.24823	1.36528	0.992494	1.15551	1.13146	1.28569	0.765585	0.91058	0.890512	1.13725	1.15736	1.05579	0.813279	0.811726	1.37002	1.06024	1.17296	1.20053	0.923645	1.04793	0.79502	0.724362
624	chr2	125282155	125898381	0.940396	1.03581	1.10243	0.804286	0.822941	1.58203	0.75556	1.12599	1.26382	1.1918	1.22845	1.04073	0.890612	0.797301	1.31892	0.964807	0.684109	1.4799	0.834631	0.987103	0.965608	0.794285	1.12714	1.186	0.908448	1.06878	0.991219	1.32082	0.985857	1.37438	0.984189	0.78658	1.07481	1.14681	1.04446	0.784556	0.599029	0.850025	0.993152	0.845229	1.19699	1.5761	1.32295	1.31782	1.08994	0.556147
625	chr2	125898382	126549317	1.29878	1.43697	1.11645	0.553184	0.985931	1.23772	0.953263	1.01259	1.2014	1.20273	1.46709	0.852894	1.15759	1.13892	1.82878	1.06037	0.381561	1.39234	0.99649	0.889415	0.910194	0.682971	1.14232	1.51868	0.903926	1.44874	0.909878	0.835471	1.02169	1.46398	0.849	0.920993	0.891557	1.1004	1.26305	0.933737	0.595114	0.825845	1.50541	1.23145	2.03252	1.28794	0.884997	1.42428	0.981554	0.669043
626	chr2	126549318	127182281	0.882155	1.13183	0.956233	0.913606	0.766683	0.985355	0.858895	1.12066	0.829927	1.13958	1.22521	0.687727	1.18845	1.25713	1.56651	0.953763	0.402302	1.34784	0.955237	1.06713	0.906847	0.679422	0.70473	1.20242	1.07309	1.19077	1.06613	1.46858	1.0201	1.38348	0.820459	1.13519	0.951044	1.01958	1.11734	1.02582	0.676105	0.644097	1.1523	1.23212	1.91841	1.35586	1.08309	1.13099	0.900604	0.296811
627	chr2	127182282	127719097	0.99115	1.13915	0.994067	1.10587	0.916892	1.01356	0.921668	1.12951	1.09626	1.29059	1.34247	0.885163	1.11878	0.970784	1.41656	0.952663	0.341228	1.20689	1.12328	1.15266	0.988673	1.04201	1.53346	1.11453	1.02275	0.91125	0.745612	1.16349	0.985218	1.48211	0.866907	0.738297	0.891675	1.03945	1.03057	0.699225	0.610092	0.923728	1.4797	1.0213	2.1552	1.28684	1.22837	1.16501	0.96962	0.624588
628	chr2	127719098	128248568	0.973419	1.10821	1.17974	1.17763	0.877356	0.559084	0.724211	1.02119	0.796461	1.02629	0.863366	1.05368	0.789394	0.833024	1.32187	0.816598	0.424375	0.991284	1.0317	1.03154	0.84437	1.06226	1.25422	1.00925	1.04675	1.00509	0.963675	1.23877	1.07741	1.18939	0.816506	1.05326	0.702314	1.07477	1.09542	0.914193	0.230532	0.577983	1.14421	0.78005	1.62094	1.13067	1.13147	1.02921	1.26696	0.587512
629	chr2	128248569	128804307	1.00252	0.937517	1.00486	0.830244	0.853232	1.01568	0.638443	1.07457	0.87891	1.0624	0.966177	1.21625	1.07592	1.2212	1.39237	1.04044	0.8151	1.48064	0.772747	1.19891	0.840791	1.00071	1.01756	1.15983	0.672649	0.629476	0.977594	1.0843	1.04032	1.13581	0.860418	0.965558	0.933003	1.0287	1.02097	0.867757	0.659141	0.670355	1.49841	0.872121	1.44588	1.06639	0.799791	0.779875	0.736964	0.788413
630	chr2	128804308	129334972	1.00851	0.801965	0.94412	1.01004	0.524688	0.953571	0.813472	0.876591	0.888281	1.17285	1.06585	0.801295	0.710512	0.988667	1.2263	1.13451	0.743537	1.05795	1.23162	1.17982	1.00046	1.20108	0.917444	1.26794	0.969469	1.25053	0.994757	1.13684	0.897938	1.23033	0.789661	0.883341	1.33782	1.12293	1.27249	0.87128	0.870932	0.837474	1.4109	0.888312	0.913398	1.04226	1.0708	1.05593	0.994282	0.879446
631	chr2	129334973	129893529	0.942437	1.1458	0.902074	0.99318	0.932565	1.33627	0.960465	1.00307	1.32095	1.1341	1.16239	0.911986	0.938571	1.02638	0.986792	1.03962	0.35855	1.18212	0.887091	0.920779	0.990501	1.19494	1.063	0.945631	1.11778	1.09897	1.10057	1.16025	0.940935	1.36881	0.937891	0.798019	1.16948	1.10961	1.14724	0.938853	0.578546	0.875844	1.74532	1.26357	1.37154	1.35001	1.10405	1.49522	0.835035	1.02175
632	chr2	129893530	130489798	1.19466	1.14224	0.910368	1.06548	0.945491	1.47041	0.707565	0.999212	0.899302	0.96681	1.19986	0.859342	0.744003	0.954386	1.40425	1.00712	0.32902	1.37651	0.941763	0.894912	1.10137	1.41038	0.917533	1.276	1.04082	1.2374	0.953731	1.10005	0.83823	1.42192	0.829474	1.17729	1.11789	1.15823	1.20369	0.935065	0.839769	0.947522	1.52188	1.05477	1.36392	1.30082	1.36478	1.09178	0.890834	0.972492
633	chr2	130489799	131034968	1.12745	1.0752	1.06237	1.01378	1.01951	1.1198	0.706441	1.05581	0.825135	0.935692	1.04858	1.05699	0.980116	0.924091	1.27013	0.988641	0.640055	0.95057	1.03939	0.630771	1.02067	0.995252	1.39171	1.17798	1.17476	1.61227	1.06675	0.891997	0.98173	1.00093	0.800366	0.870569	1.23198	1.11034	0.828523	0.88632	0.825757	0.813672	1.30313	0.988536	0.945242	1.08906	1.12386	1.36415	1.26697	0.95724
634	chr2	131034969	131489969	1.20367	0.962874	0.921965	0.905348	1.0382	0.945768	0.827639	1.06272	0.766424	0.995942	1.31019	1.18458	1.19262	1.05044	1.30367	0.809891	1.11585	1.37283	0.762948	0.729179	0.924031	1.19886	1.11594	1.00745	1.11279	1.26281	1.35413	1.3646	1.14292	1.22238	0.914087	0.707953	1.11262	1.18699	1.11193	0.781186	0.928276	0.684174	1.29327	0.976394	1.53554	1.16721	1.02002	1.40079	0.7551	0.82979
635	chr2	131489970	132045389	0.946164	1.19309	1.12504	0.803826	1.1538	0.879304	0.563788	1.15873	1.04076	1.14937	1.04246	0.974239	0.826327	0.761434	1.19319	1.06687	0.957738	1.21696	0.828462	0.932899	0.901345	0.992205	1.28362	1.04589	1.17157	1.15171	1.18475	0.947269	0.917935	0.94539	0.943585	0.910295	0.921564	1.19309	0.906199	1.04375	0.627719	0.704461	1.32757	0.906453	1.94248	1.01461	0.82556	1.30647	1.41814	1.1134
636	chr2	132045390	132624565	1.23437	1.05441	1.04938	0.815459	1.06242	1.05991	0.544055	0.986581	1.15918	1.18464	1.24245	0.915682	0.761194	1.27907	1.0979	0.889906	0.605461	1.02454	0.94644	0.849951	0.891552	1.12561	1.14096	1.2041	0.885992	1.15276	1.03419	1.0107	0.974142	1.07108	0.844608	0.784705	0.68113	1.02608	0.927534	1.07423	0.546761	0.568215	1.3331	1.22698	1.37067	0.609479	1.23516	1.33664	1.22456	1.02154
637	chr2	132624566	133106652	1.06434	1.34892	1.04918	0.906316	1.14842	1.11315	0.779538	1.18525	1.22242	1.3469	1.23026	0.940249	0.901406	0.878784	1.22449	1.11135	0.575395	1.16668	1.32215	0.711393	0.9433	1.14281	1.72919	1.09297	0.83257	1.22513	0.858074	0.912905	1.07471	1.18941	0.991892	1.2196	0.991039	1.16154	1.06412	1.07832	0.625939	0.907397	1.23788	1.08151	1.32386	0.8992	0.828981	1.31118	0.971292	0.747292
638	chr2	133106653	133646729	1.20061	1.14827	0.867622	0.806511	0.87274	1.16237	0.871093	0.829533	1.29168	1.38344	1.15749	0.937091	1.15285	1.02703	0.982628	0.911973	0.618205	1.04686	0.918277	0.98708	0.816939	1.01398	1.15176	1.26373	0.970879	1.00392	0.935654	1.08577	0.818093	1.15528	0.99655	1.02832	0.837626	1.01488	0.818659	1.07306	0.672346	0.847192	1.18766	0.929027	1.51349	1.02386	1.35949	1.16726	1.08833	1.07707
639	chr2	133646730	134222441	1.12094	1.20829	0.740518	1.20304	0.692757	1.0581	0.775744	1.02527	1.04167	1.32907	1.32163	1.14341	1.23969	1.02174	1.02224	0.969467	0.677181	1.37132	1.23	0.999679	0.91901	1.22422	1.79463	1.1362	1.10503	0.87796	1.0802	1.16712	1.29548	1.50916	0.936585	0.915734	0.895717	1.10299	1.08766	1.01895	0.398733	0.989924	0.962496	0.950839	1.21713	0.828925	1.12447	1.23452	1.19335	1.33157
640	chr2	134222442	134764646	1.18237	1.12653	0.989402	1.13093	1.02209	1.11391	0.71255	0.83922	0.876952	1.15317	1.24192	1.06172	1.20976	0.850024	1.24367	0.966921	0.730296	1.17152	1.28598	1.1442	0.886191	1.03667	1.45785	1.26527	1.05923	1.12547	1.06938	1.06871	1.1923	1.29593	1.07154	0.94501	1.04517	1.16488	0.976184	0.983152	0.35323	0.81931	1.5806	0.997731	0.860247	1.05849	0.883435	1.16204	1.30091	1.82032
641	chr2	134764647	135304965	1.10217	1.19056	1.02049	0.640632	1.14908	0.806313	0.798276	1.4469	0.975031	1.16548	1.12221	0.599279	1.06798	0.826281	1.0396	0.961841	0.626654	1.53678	0.847544	0.847669	0.884745	0.715236	1.38411	0.97656	1.09363	1.12984	1.11307	1.22501	1.29517	1.11605	1.06915	1.23209	1.23245	1.13373	0.961511	1.00367	0.48192	0.720066	0.937067	1.20746	0.855715	0.828558	1.28196	1.23283	0.892758	1.26789
642	chr2	135304966	135899815	0.948743	1.11051	0.744694	1.11029	1.01607	0.684591	0.742946	1.10552	1.32497	0.921812	1.2942	1.04347	1.15718	1.12602	0.933638	1.08379	0.59527	1.29965	1.36918	1.21019	0.897155	0.878919	1.19225	1.16983	1.06382	1.12517	1.10632	1.38404	0.803895	1.35031	1.1297	0.873979	1.19117	1.00722	1.03897	1.05771	0.313327	0.837626	1.11333	1.13509	1.08622	1.0269	0.846566	0.98404	1.23055	1.03629
643	chr2	135899816	136522587	0.979335	0.793868	0.993516	0.984247	1.00462	0.942664	0.794045	1.25012	1.29101	0.869784	1.39027	1.28181	1.25183	0.985575	0.982593	0.953305	0.717668	1.4675	1.00112	1.10766	0.994472	1.10612	1.60765	1.43052	0.940433	1.12643	0.960586	0.976167	1.09775	1.50519	1.03607	0.925615	1.05694	1.09952	0.969675	1.21019	0.526973	1.07208	1.36236	1.22085	1.01436	1.15736	1.10302	0.956699	1.19021	0.917555
644	chr2	136522588	137080316	0.926443	1.36429	1.1839	1.05779	1.16848	1.08087	0.598334	1.16164	0.642193	1.18155	1.17121	0.763495	0.876258	0.866631	1.2612	1.13263	0.326993	0.863619	1.31292	1.05919	0.764036	0.936223	1.23137	0.986321	1.32157	1.37569	0.896314	1.29006	1.00434	1.4721	1.02031	1.14153	1.19395	1.02657	0.95855	0.981936	0.507041	0.726561	1.3267	0.914674	0.805984	0.911835	1.10552	0.969855	1.00548	1.12358
645	chr2	137080317	137659284	0.96977	1.41573	1.01098	1.0265	0.850459	0.925534	0.863711	0.842471	1.11086	1.15804	1.37681	0.975053	0.930149	0.756288	1.31656	1.00808	0.781116	1.11134	1.25715	1.00991	1.10011	0.957661	0.902539	1.29157	0.980046	1.18439	0.928131	0.959286	1.11539	1.6146	1.10202	0.809598	1.10218	1.12313	1.03533	0.992025	0.41081	0.987212	1.25935	1.03038	0.694304	1.1459	1.4606	1.46258	1.55024	1.02912
646	chr2	137659285	138290205	1.2179	1.29108	0.998711	1.08816	0.913774	0.858332	1.04401	1.11062	0.794188	1.26094	1.33781	0.882678	1.04372	1.02453	1.10354	1.05415	0.327976	1.47316	0.869074	1.01731	1.04367	1.1508	1.45541	1.31219	1.16226	1.50576	1.1609	0.995386	0.997634	1.4961	1.06458	0.934672	0.892113	1.08681	1.20672	0.881595	0.90543	0.80599	1.25864	1.13906	1.29904	1.30479	1.06127	1.33057	1.53151	0.88396
647	chr2	138290206	138899521	1.01246	1.01085	1.09187	0.718558	1.12162	0.863326	0.984096	1.00622	0.878347	1.0819	1.3115	1.23799	1.4118	0.907265	1.18522	1.11365	0.920741	1.35387	1.08987	0.877332	1.03337	1.00568	1.51184	1.37908	0.697209	1.08337	1.18581	1.01545	1.26432	1.35681	1.03809	0.990471	1.01631	1.00032	1.15656	0.901012	1.01787	0.751837	1.42758	0.972753	1.80431	1.3795	1.16052	0.842133	1.04987	1.45421
648	chr2	138899522	139500158	1.22064	1.21303	0.927621	1.19653	1.10037	0.794001	0.839797	1.05184	0.749759	1.02005	1.16444	1.25474	1.02172	1.24424	0.992821	1.02081	0.628391	1.26467	1.15083	0.946699	1.01314	1.19811	1.6236	1.18159	1.1914	0.913973	0.967803	0.995203	1.18537	1.29321	0.983255	0.842127	1.15729	0.981645	1.12835	1.15819	0.543003	0.774076	1.06825	1.06109	1.24772	1.08302	1.02966	1.60447	1.27356	1.55715
649	chr2	139500159	140135867	1.08133	1.19439	0.890478	0.655636	1.0352	0.86128	0.870209	1.28234	1.00185	1.19856	1.54939	1.00404	1.0495	1.18906	0.99876	0.970498	0.602872	1.37695	0.995438	1.27549	0.96626	0.930168	0.946627	1.26046	1.09967	1.12437	0.806351	1.14214	1.09434	1.62116	1.0079	0.794547	1.00856	1.09474	0.892171	0.87909	0.85855	0.782601	1.3139	1.22142	1.82684	1.20181	1.06917	1.42252	1.20978	1.39981
650	chr2	140135868	140785949	1.10546	1.39656	1.05567	1.12858	0.833581	0.663805	1.0024	1.17129	1.15379	1.08905	1.58569	1.38683	0.837691	1.18288	1.29465	1.05488	0.678046	1.29516	0.982324	0.939461	0.754326	0.682968	1.05616	1.23922	0.908918	1.22338	1.09439	0.884895	1.3355	1.57943	0.919696	0.861874	0.789499	1.08338	1.09083	0.975275	0.667345	0.728073	1.19853	0.804565	0.916541	1.48761	0.941388	1.35347	0.978536	1.21454
651	chr2	140785950	141440323	0.917653	1.12464	1.05344	0.874081	1.03491	1.00421	0.786811	1.16867	0.744301	1.05893	1.07412	0.927591	0.741371	0.966597	1.14047	1.16617	0.294001	1.05114	0.873586	1.17897	0.855821	0.611765	1.0144	1.26501	1.04518	1.04433	1.1889	0.895659	1.12298	1.31738	0.771518	0.899868	0.945837	1.13499	1.04472	1.04366	0.606521	0.713171	0.841959	1.2879	0.907134	1.13552	1.03898	1.02425	1.13672	0.887331
652	chr2	141440324	142108722	0.955533	1.01349	0.921715	0.962855	0.981091	0.857552	0.728251	1.14322	1.05328	1.02167	1.26325	0.935698	0.889936	1.0285	1.05233	0.979238	0.348715	1.09693	0.84312	1.1098	0.956484	0.774976	1.57656	1.12796	1.09517	1.00487	0.986506	0.955239	1.1181	1.49091	0.978639	0.953317	1.35181	1.13427	1.0511	0.823637	0.696521	0.83955	1.24802	1.18575	0.718558	1.09803	1.17154	1.14631	1.42477	1.12137
653	chr2	142108723	142764688	0.984941	1.00465	1.04294	1.13631	0.91526	0.866637	0.535676	1.06344	1.20779	1.01992	1.33848	1.17957	0.882531	1.0252	1.00484	1.04136	0.670424	1.07354	1.01245	0.962477	0.952534	0.908252	1.1739	1.31916	0.964084	1.1514	1.08856	1.11588	1.06324	1.37863	1.09012	0.836	0.860125	1.13594	0.964353	0.893032	0.667277	0.786772	1.17847	1.13188	0.728898	1.03982	0.879003	1.1589	1.51901	1.47822
654	chr2	142764689	143423926	1.45827	1.20243	0.965216	0.930221	0.991267	0.632297	0.846551	1.30516	0.876684	1.29822	1.11792	0.664484	0.917319	1.26889	0.99124	1.03514	0.406752	1.07662	1.02786	1.04836	1.00537	1.3512	0.953123	1.32351	1.03159	1.08195	0.928084	0.829886	0.895805	1.33137	0.945903	1.00369	1.20459	1.12749	0.943515	0.999301	0.605099	0.709027	1.38083	0.863729	1.21025	1.13258	1.00321	0.903	1.21801	0.855411
655	chr2	143423927	144043797	1.19879	0.938358	1.56793	1.16782	1.28514	1.03923	0.870972	1.27262	1.21758	1.28437	1.49206	1.05742	0.953582	1.00492	1.18053	0.881665	0.573607	1.28123	1.07841	1.04538	0.962333	0.979601	1.17788	1.34413	0.903802	1.40196	0.753683	1.07952	1.10285	1.09522	0.995541	1.09028	1.00377	1.04939	0.84882	0.922874	0.82706	0.880854	1.62029	0.958829	0.994837	1.0059	1.04255	1.27974	1.35793	0.972836
656	chr2	144043798	144599655	1.22837	0.932045	1.2637	1.12242	1.08333	0.868791	1.01071	1.03761	0.934865	1.30217	1.43435	1.0208	0.975344	1.02158	1.32073	0.995359	1.21351	1.28723	0.906919	1.42124	0.95074	1.02295	1.65962	1.25262	0.982816	1.15753	0.991406	1.06829	1.13057	1.12924	0.811219	0.954185	1.16876	1.03671	0.967006	0.891782	0.429624	0.81037	1.35762	0.896468	1.39787	1.01993	1.11443	1.51288	1.06841	1.02098
657	chr2	144599656	145185520	0.940128	1.14994	1.1413	1.3088	1.04427	0.910744	1.15866	1.07846	1.02368	1.22885	1.05709	0.844105	1.31465	0.962059	1.02575	0.935356	0.86779	1.04565	1.06992	1.32388	1.0613	0.952684	1.2845	1.45087	0.578188	0.642114	1.03922	0.852261	0.90149	0.984323	0.790495	1.13834	1.03153	1.00337	1.05313	0.85154	0.697558	0.833381	1.92366	0.936166	1.19104	1.16918	0.979956	1.21393	0.964358	0.913883
658	chr2	145185521	145739007	1.06435	1.10811	1.18994	1.03776	1.08194	0.847714	1.13927	1.14024	0.86703	1.29995	1.06848	0.849772	1.0321	0.946283	1.30373	1.03487	1.06374	1.10357	1.05666	1.11873	0.902686	1.30638	1.26787	1.1387	0.979548	0.877053	0.906522	1.0866	1.02022	1.07552	0.907709	0.747372	1.20345	1.12568	0.91755	1.06563	0.450549	1.03534	1.33142	1.02662	0.832225	1.10659	1.15038	1.07289	1.43728	1.06864
659	chr2	145739008	146313042	0.986487	1.31621	1.24177	0.866471	0.98337	0.716434	1.10891	1.32382	0.956628	1.14417	1.22075	1.06178	0.71953	0.82134	1.00018	0.881038	0.990377	1.14606	1.00963	0.992488	0.966131	0.881587	1.23952	1.43623	1.00944	0.830537	1.03227	1.25181	0.953921	1.10562	1.01413	0.664879	0.890305	1.04922	0.978589	1.01304	0.268854	0.825989	1.46255	1.1248	0.646706	0.991186	0.965926	1.0922	1.19298	0.804714
660	chr2	146313043	146935779	0.979069	1.35608	1.06104	1.02752	0.957994	0.878656	1.03365	1.05978	0.694316	1.26466	1.52615	0.991234	1.23869	1.03489	0.806141	0.962463	0.792144	1.13887	1.21565	0.988886	0.962342	1.31321	1.2788	1.41079	0.877353	1.17147	1.24118	1.12625	1.01371	1.06555	0.981026	0.938719	1.23747	0.948957	1.17153	0.728266	0.220028	0.626482	1.15138	0.796598	0.653947	1.17119	0.911035	1.26241	1.37308	0.715769
661	chr2	146935780	147576202	1.11618	1.28483	1.06017	1.23252	0.902121	0.65772	1.25488	1.02047	1.0415	1.15866	1.53728	1.28445	0.809565	0.99953	0.831691	0.887469	0.618786	1.22508	0.931051	0.670018	0.947255	1.04608	1.39594	1.17426	1.11357	1.00172	0.908023	1.16595	1.01202	1.13856	1.02783	0.815674	0.787271	0.987067	0.858179	0.964476	0.502461	0.720689	1.30238	0.979092	1.03744	1.50332	0.867324	0.885221	0.963958	0.791601
662	chr2	147576203	148177701	1.05506	1.08661	1.24076	0.918302	1.11498	1.16954	1.17983	1.01128	1.05587	1.15048	1.22816	1.31438	0.863794	1.13883	1.03609	1.08497	1.08481	1.1609	1.15575	1.21915	0.915654	1.22516	1.05581	1.30433	0.843357	1.30206	1.0047	1.07409	1.08924	1.23417	1.00655	0.894784	1.0314	1.25063	1.26241	0.960223	0.524606	0.540931	1.35971	0.956005	0.674837	1.47907	1.36481	1.38058	1.09013	0.934544
663	chr2	148177702	148767873	1.13363	1.23953	1.47455	0.986338	1.12258	0.758175	1.51415	1.13578	0.809544	1.18217	1.83984	1.53972	0.997415	1.00753	0.918663	1.04812	1.29696	1.29267	1.07772	1.34248	0.945507	1.28537	0.74909	1.43078	0.721014	0.852958	0.97286	1.27179	1.0918	1.23483	1.08098	0.865838	1.04247	0.988982	0.943685	0.965779	0.748159	1.12448	1.07426	0.850973	0.88706	1.45141	0.725133	1.40947	1.18119	1.02134
664	chr2	148767874	149395999	1.19312	1.34789	1.16556	0.874993	1.13573	0.836876	1.13442	1.10462	0.980589	0.903984	1.43482	0.879769	1.73626	0.771241	1.11186	0.99306	0.593932	1.23841	1.13145	1.20633	1.01109	1.1493	1.34348	0.9714	0.991491	1.37058	1.17693	1.13752	0.98473	1.11737	1.08178	0.945533	0.889156	1.07487	1.31189	0.93343	0.515405	0.79532	1.25583	0.843453	1.80225	1.48564	0.74312	1.08943	1.20461	1.02257
665	chr2	149396000	150051142	1.13073	1.01082	1.39412	0.733347	1.0275	0.332444	1.4169	0.634418	1.15015	0.479445	1.36515	1.02611	1.02855	0.541135	1.29553	1.03562	0.819429	1.37742	1.1261	1.09733	0.880956	1.01815	0.991233	1.16285	0.943539	1.18466	1.11895	0.88032	0.998175	0.867021	0.630382	0.66426	1.21839	0.934386	1.18635	0.506203	0.555454	0.66524	0.938214	1.1562	1.53636	1.63044	1.39378	0.992518	0.976808	0.891438
666	chr2	150051143	150624089	1.02917	1.37584	1.42691	0.966473	0.863827	0.507773	0.989715	0.606801	0.852818	0.463643	1.40913	1.18399	1.07957	0.420017	1.29706	0.828846	0.835804	1.10176	0.954184	0.910346	0.956048	0.948274	1.27431	0.951159	0.840075	1.04175	1.13641	1.47606	1.05123	1.33515	0.583579	0.85681	1.15788	0.949448	0.979643	0.485261	0.795725	0.831617	0.916072	1.15647	1.91251	1.48564	1.05459	1.57602	0.924406	1.10647
667	chr2	150624090	151226361	1.00831	1.14992	1.27762	1.10392	0.976498	0.363976	1.08681	0.510323	0.876046	0.528169	1.49629	0.940836	1.06477	0.390679	0.896625	0.805666	1.16147	1.05485	0.827235	1.1004	0.914019	1.03907	1.24487	0.998302	0.994791	1.06657	0.864299	0.974778	0.922861	1.08752	0.439697	0.82282	0.720847	1.05722	0.969594	0.421469	0.316916	0.903122	1.60509	1.07246	1.60741	1.11868	0.934901	1.09905	1.1704	0.974271
668	chr2	151226362	151773493	1.08888	1.12951	1.6362	0.988386	0.814218	0.534252	1.16573	0.635239	0.852535	0.671664	1.2675	1.0084	0.907086	0.576696	0.772198	0.842821	1.08685	1.0822	0.648945	1.08694	1.05776	1.02738	0.940273	0.975187	1.00566	1.04287	0.897323	0.711627	1.04675	0.965637	0.606777	0.89906	0.666284	0.843905	0.856708	0.470003	0.470471	0.63409	1.03429	0.805127	1.48261	1.10983	0.900062	0.941024	0.788388	0.953156
669	chr2	151773494	152351712	1.14313	1.26912	0.795229	1.27312	0.774517	0.44503	1.21671	0.577504	0.869446	0.770482	1.13632	0.94248	1.0424	0.478245	0.778116	1.09853	0.770934	1.00964	0.897991	1.0486	0.937403	0.940769	1.2924	1.09779	1.03864	1.26262	0.826192	1.20104	0.964188	1.27923	0.484385	0.770324	1.01722	1.00411	0.987702	0.531682	0.993329	0.772803	0.743127	0.728727	1.70408	1.28614	1.17957	1.13435	0.910296	1.0127
670	chr2	152351713	152904898	1.10029	1.17021	1.00563	1.1123	1.03669	0.582065	1.11281	0.582695	1.1118	0.784243	1.67332	1.41447	1.17764	0.566706	1.24355	1.22244	0.62325	1.12152	0.987951	1.09008	1.05212	1.2406	1.01139	1.1378	1.27214	1.23063	1.24895	1.23162	0.752715	1.28924	0.487219	0.801628	1.18553	0.927947	1.09365	0.574612	0.808405	0.879064	0.896224	1.11222	1.41372	1.39872	1.15056	1.12797	0.846744	0.931928
671	chr2	152904899	153459618	1.14218	1.23713	1.45654	1.07152	0.887107	0.596437	1.11318	0.810712	0.874054	0.76546	1.0557	1.44531	1.35624	0.517018	0.996864	1.01502	0.939192	1.19226	0.910532	0.975666	1.03394	1.01887	0.841247	1.13136	1.18409	1.38517	0.838935	1.08684	0.948671	1.06693	0.656758	0.820323	0.991846	1.04012	1.09757	0.408483	0.622313	1.17596	1.02178	0.853472	1.13466	1.7485	0.760964	1.1477	0.981379	1.06949
672	chr2	153459619	154054749	1.14061	1.1011	0.982469	0.938396	0.953092	0.329118	1.04783	0.863701	1.01833	0.660498	1.59938	0.635655	1.31663	0.529574	1.0556	1.06019	1.02377	1.36329	1.1365	1.18242	0.934058	0.771608	0.838092	1.24794	1.27682	1.04421	0.998913	0.941659	1.04659	1.10155	0.576936	0.806097	1.23683	0.931097	1.25419	0.449162	0.52161	0.658131	1.24202	0.952408	0.875421	1.53874	0.878655	1.76324	0.866325	0.734023
673	chr2	154054750	154696884	0.978332	1.11023	1.03209	0.96002	0.880736	0.687953	1.06607	0.674213	0.889203	0.550841	1.32065	0.695095	1.06424	0.616871	1.10569	0.898044	1.16814	1.31348	1.05433	0.995909	1.13187	1.24233	0.662526	1.39974	1.07762	1.23766	1.16334	1.23318	1.09943	1.20708	0.576901	0.992672	0.993122	0.906462	1.23133	0.432097	0.622999	0.878936	1.0294	1.25158	0.698903	1.49325	0.750645	1.29254	0.934373	0.437464
674	chr2	154696885	155350732	1.11096	0.946888	1.17784	0.838482	0.834731	0.408954	1.06021	0.458787	1.04005	0.574104	1.59497	1.19429	0.984062	0.672039	0.870078	0.91387	1.19367	1.2343	1.12514	1.11377	0.948016	0.969033	1.14941	1.14894	0.985505	1.1093	1.08168	1.05864	0.880325	1.11545	0.529015	0.98425	0.820819	1.02713	1.23976	0.462452	0.869867	0.727501	1.31827	0.912637	0.816077	1.34359	0.647833	1.1136	1.12191	0.892635
675	chr2	155350733	156010048	1.01039	1.11313	1.38514	1.19641	0.945483	0.274376	1.10675	0.645308	0.684332	0.506077	1.29883	1.28772	1.00468	0.450226	0.977165	0.886465	0.908225	1.14908	0.851001	0.863253	0.955869	0.324038	1.17114	1.49331	0.985248	0.949899	0.822387	1.01631	1.02399	1.50129	0.535947	1.0867	1.11456	1.16585	1.11727	0.437582	0.756768	0.603716	1.60781	1.08222	1.44701	0.979189	1.07132	1.4215	0.856024	0.928458
676	chr2	156010049	156677526	1.19044	1.10705	1.17312	0.952507	0.885541	0.532046	1.2487	0.61827	1.09584	0.546125	1.15903	1.28836	1.06877	0.410958	0.67932	0.894993	1.14247	1.40118	0.715828	0.954819	0.931248	0.813998	1.83832	1.27324	1.08678	1.5624	0.942163	0.826331	0.954619	1.15642	0.618621	1.04282	1.04556	1.02563	1.04264	0.578285	0.375705	0.781527	1.25355	0.890208	0.879646	1.78693	0.968073	0.865742	0.986491	0.930438
677	chr2	156677527	157291932	1.04593	1.12104	1.10191	1.06087	1.03222	0.686275	1.10002	0.677641	0.951907	0.802743	1.06136	1.16004	0.672062	0.558165	0.977003	0.922267	1.02829	0.962214	1.00883	0.976538	0.88327	1.19613	1.42463	1.34855	1.24048	0.953825	0.859231	1.2476	1.00824	1.18694	0.696139	0.743197	0.944861	0.95826	1.23582	0.585082	0.428991	0.75699	1.30408	0.929677	0.969309	1.22862	1.04623	1.21401	0.655336	0.999694
678	chr2	157291933	157906405	1.11086	1.16472	1.1738	1.56219	0.945014	0.889825	1.20059	1.07797	0.838769	0.841037	1.1546	1.34297	0.919143	1.12412	0.812655	1.05476	1.52828	1.16633	0.729383	0.975255	1.03387	0.942791	1.0615	1.14547	1.37942	1.51874	1.27983	0.911924	1.15549	0.951944	1.13577	0.9067	0.951432	1.1156	0.991521	0.948705	0.792034	0.882743	1.13796	1.04771	1.7508	1.59993	0.683639	0.87458	0.883096	1.03209
679	chr2	157906406	158508422	1.18932	1.01106	1.21653	1.48147	0.949934	1.0729	1.13416	0.942212	1.11263	0.889588	1.17834	1.34527	0.829201	1.149	0.906505	0.992973	1.44631	1.05364	0.95139	0.860034	1.06153	1.05906	1.59291	1.42773	1.1372	1.03862	0.684811	1.25373	0.971542	1.52636	1.03754	0.826006	0.69988	1.0947	1.01298	0.961966	0.765678	0.831257	1.47771	1.10878	1.26911	1.62417	0.917962	0.810379	0.966582	0.833064
680	chr2	158508423	159062860	0.915389	1.15587	1.26168	0.862193	0.858292	0.609056	0.942812	1.01489	0.839024	0.718946	1.0903	0.824882	0.887073	0.729046	1.06524	1.13304	0.865719	1.19526	1.18603	1.17101	0.965341	1.06945	1.19083	1.3547	1.32049	0.803291	0.73758	0.953701	0.731861	1.14443	1.19141	0.986585	1.27267	0.985807	1.18205	0.714719	0.449869	0.699069	1.23096	0.984106	1.65593	1.30308	0.708806	0.940066	1.05898	1.18149
681	chr2	159062861	159642040	1.12767	1.14471	1.15901	0.995534	1.05701	1.03199	1.09476	0.941763	0.871669	0.852853	1.22482	1.15083	1.29828	1.02199	1.10774	0.97223	1.01618	1.37186	1.62151	0.751167	0.864055	0.745179	0.707874	1.25856	1.23279	1.42473	1.04445	1.0561	0.806597	1.35489	1.22148	0.967489	0.959254	1.02213	0.989065	1.07204	0.605424	0.866623	1.27446	1.07469	1.18695	1.24096	0.874309	1.07538	1.01944	1.09062
682	chr2	159642041	160199310	1.15526	1.39142	1.08313	0.864949	0.948651	0.832336	1.01448	1.49857	1.04321	0.998937	1.07223	1.03002	1.05208	1.02153	1.0396	0.928439	1.46873	1.04607	0.980631	1.20304	0.930137	0.972076	0.8608	1.20514	1.31897	1.34328	1.04294	0.924943	1.04556	0.930891	1.20771	1.05629	1.4038	1.14881	1.16	1.09738	0.414373	0.939957	1.39672	1.09824	0.571815	0.939791	0.78798	1.12765	1.02288	1.11073
683	chr2	160199311	160824850	0.757491	1.15559	0.933803	1.2049	0.947537	0.687601	1.03182	1.3567	1.17999	0.804976	0.925758	0.900942	1.00078	1.22054	0.831573	0.97413	1.45947	1.02769	0.589532	1.01553	0.943764	0.92349	1.43047	1.13966	1.1434	1.40478	0.972439	0.905033	0.907764	1.00241	1.10604	0.983208	0.834514	1.11817	0.948091	1.07379	0.515385	0.908449	1.25129	0.907139	0.458683	1.26804	1.1287	1.04411	1.12596	1.24644
684	chr2	160824851	161369693	1.16219	1.27009	1.07087	0.83869	0.949401	1.28644	1.05778	0.867596	1.02315	0.705208	1.27005	0.968365	0.86009	0.996771	1.13883	0.92111	1.43432	1.23411	1.09195	1.01353	0.884234	0.930853	1.14869	1.07456	1.01715	1.16652	0.92741	1.136	0.923082	0.900839	1.04838	0.791351	0.961328	1.09134	0.825346	0.850583	0.415399	0.840836	0.871087	1.01739	0.717163	1.02386	0.903144	1.06154	0.942782	1.31979
685	chr2	161369694	161948721	1.16191	1.107	0.964973	1.24272	0.95168	0.922039	0.979506	1.01677	1.20622	0.850097	1.0322	0.882009	1.02763	0.880153	0.790841	1.0901	1.12929	0.9131	1.23969	0.870195	0.897225	1.19818	1.2934	1.08442	0.979977	1.24519	0.844397	0.812005	1.1099	1.08815	1.04575	0.995917	1.13204	1.06483	1.08845	0.671502	0.751605	0.874897	1.40405	0.853307	0.699187	0.972911	1.06584	0.771772	1.18292	1.09705
686	chr2	161948722	162533747	1.17157	1.10072	0.928748	1.13569	0.89301	0.765003	1.20496	0.928298	0.672055	0.862117	1.12858	1.02388	1.18818	0.864004	0.790945	0.929561	1.42776	1.12457	1.03084	1.14122	0.894	0.985007	0.794311	1.04845	0.930602	0.923728	1.1157	1.10325	0.857544	1.12489	0.933665	0.81849	0.738951	0.976168	1.01234	0.82432	0.330279	0.813137	1.28705	0.763311	0.789519	1.05576	0.660307	0.969324	0.846663	1.3097
687	chr2	162533748	163121885	1.0864	1.32289	1.25035	0.758155	1.08429	0.993229	1.02941	0.858866	0.96821	0.838861	1.0879	0.913656	1.0977	0.91109	0.894588	0.859675	1.14316	1.15724	1.09587	0.875068	0.937321	0.931906	1.16214	1.06702	0.904164	0.737316	1.17125	0.83674	0.706364	1.25487	0.916347	0.823917	1.20235	1.08121	0.956318	0.948552	0.329832	0.783876	1.08311	1.1258	1.41465	1.284	0.638425	0.812037	1.23121	1.27877
688	chr2	163121886	163720133	1.03099	0.793571	1.12742	0.774651	0.977707	0.512768	1.20751	1.10574	0.653635	0.873353	0.961924	1.29529	0.758532	1.22466	0.797309	0.85353	1.20333	1.07708	1.10857	0.692835	0.942571	0.849686	0.693222	1.29469	1.23251	0.974547	1.09202	1.01037	0.947729	1.08001	0.861144	0.884104	0.943984	1.07074	0.889553	0.926769	0.399935	0.862417	1.52124	0.98026	1.11792	1.15276	1.16267	0.951929	1.13531	0.986731
689	chr2	163720134	164318683	1.13933	1.22626	0.823729	0.745737	1.01042	0.829669	1.08263	1.08706	0.945951	0.887761	1.19638	0.900903	0.758905	0.853084	0.734248	0.888753	1.45373	1.22829	0.973473	1.20347	0.887752	0.552116	1.15921	1.03645	1.07025	1.18977	0.961351	1.07512	1.03248	0.845147	0.950976	0.739069	0.957093	1.09868	1.03901	0.806168	0.652067	0.603566	1.65405	0.867053	1.24633	1.13739	0.706358	0.973314	0.860501	1.00768
690	chr2	164318684	164918451	1.04	0.993538	1.25172	0.797885	0.955919	0.732654	0.974813	0.885905	0.889032	0.662167	1.04759	1.0026	0.837009	1.05758	0.616359	0.904272	1.45642	1.07746	0.91803	0.877562	0.95126	0.691337	0.999281	1.29124	1.04824	0.923288	0.997335	1.01234	1.00703	0.968564	0.736756	0.942198	0.892417	1.21081	1.15389	0.957384	0.430313	0.750262	1.18889	0.970835	0.947006	1.43115	0.984589	1.36984	1.06375	0.887919
691	chr2	164918452	165555633	1.03625	1.15599	1.03942	1.16776	0.972506	0.642967	1.09064	1.50977	1.03856	0.962694	0.997093	1.16548	0.902649	1.19306	0.722831	0.932925	1.79654	0.97205	0.816738	0.969611	0.99242	1.23308	0.848233	1.06286	1.17145	0.973777	1.10246	0.893606	0.865029	1.20086	1.09292	1.1418	1.21824	0.985647	0.952785	1.06495	0.763999	0.908926	1.46051	0.990745	1.65968	1.37161	0.989139	0.934529	1.00211	1.07188
692	chr2	165555634	166160355	1.08659	1.35166	0.900599	0.735767	0.900472	0.710773	1.01535	0.726074	0.961063	0.767547	1.11298	1.46764	0.989978	1.17651	0.74546	0.906568	1.59084	1.13382	1.16127	1.16625	0.943771	1.24182	1.41212	0.984924	1.0232	0.678366	0.841385	0.990437	0.946324	1.16772	1.02094	0.702545	0.722364	1.10287	0.889618	1.09703	0.626788	0.715594	1.24539	1.02144	1.13224	1.47457	0.848866	0.959593	0.893202	1.51174
693	chr2	166160356	166760960	1.06451	1.26718	0.830437	0.861947	0.868195	0.930617	1.26765	0.938153	0.894204	0.786368	0.915574	1.31869	1.14103	1.1512	0.805415	0.94097	1.19196	0.961765	1.05443	1.0999	0.835586	0.946171	1.37166	1.16198	0.997105	1.29664	1.02988	0.833829	1.04361	1.16286	1.09938	1.33353	0.933795	1.18142	0.85757	0.929463	0.692837	1.00676	1.12025	0.941372	0.604929	1.5725	0.797808	1.3375	1.19566	1.23634
694	chr2	166760961	167384385	0.966248	1.23025	0.977251	0.777499	0.889161	1.16357	1.03672	0.860571	1.07734	0.797626	1.02201	1.24631	0.832413	0.820663	0.685963	0.817037	1.07499	0.99165	0.803294	0.9819	0.989492	0.723221	0.936734	0.992994	0.963324	1.12403	0.852896	0.939937	1.01743	1.17014	1.07032	0.931217	0.989865	1.01598	0.8866	0.879302	0.560014	0.645528	1.05505	0.812923	1.24086	1.33199	0.799344	1.1671	1.23619	0.892751
695	chr2	167384386	168043138	1.07532	1.31686	1.13355	0.898079	1.01261	1.24356	1.02724	0.937396	0.793812	1.03825	1.6707	0.959831	0.839111	1.07966	0.656236	0.945219	1.15278	1.12193	1.01641	1.20648	0.926984	0.86328	1.25046	1.1214	1.04994	1.21939	1.10177	0.661404	0.974792	1.19144	1.07576	0.997723	1.1464	0.971268	1.11367	0.831547	0.393673	1.12493	1.48506	1.06872	0.871325	1.49941	1.00111	1.41869	0.796748	1.47552
696	chr2	168043139	168676549	1.24759	1.3803	1.18702	1.05987	1.03868	0.617215	1.19745	1.01794	0.804319	1.1242	1.42142	1.08367	0.974817	1.02164	0.552248	0.857219	1.12244	1.14262	1.02756	0.924544	1.06926	0.937202	0.988015	1.42683	1.16996	1.39452	1.08393	1.0087	0.75373	1.39998	1.10978	0.954342	1.03619	1.09875	1.11074	0.997201	0.562015	0.765449	1.12737	1.02003	1.30179	1.51092	1.09168	1.30581	1.1199	1.02129
697	chr2	168676550	169245870	1.23909	1.01192	1.13936	1.21614	1.01634	0.56666	0.903693	0.636418	1.25884	0.850912	1.44017	1.39082	1.10326	0.608099	0.501299	0.763704	1.30142	0.936412	0.869419	1.06798	0.947319	1.28838	1.05284	1.35492	1.01772	1.10074	0.981141	0.757606	0.964916	1.39873	0.722809	1.30907	1.43079	1.091	0.758148	0.621262	0.543462	0.81659	1.24464	1.24967	1.29477	1.43554	1.39149	0.718196	0.9063	1.1119
698	chr2	169245871	169827795	0.983605	1.13806	0.969111	0.826921	0.819963	0.50556	1.24114	0.53041	1.10108	0.842972	1.14603	1.10853	0.868771	0.464196	0.605728	0.961797	0.869809	0.963858	1.00584	1.21723	0.949762	1.16853	1.01767	1.41464	1.20299	0.980924	1.08698	0.973631	0.900267	1.13053	0.403443	1.11012	0.989369	1.01977	0.959999	0.638081	0.408854	0.938071	1.30989	0.912097	1.40707	1.67634	0.936445	1.55472	1.23339	0.923684
699	chr2	169827796	170444091	1.18794	1.11401	0.901032	0.762673	0.986766	0.373922	0.979354	0.636695	0.8903	0.763138	1.0426	1.1516	1.21895	0.529394	0.633659	0.881532	0.529849	1.23105	0.880599	0.85529	0.990582	1.00043	1.00885	1.22724	1.06271	0.785824	1.00186	1.56929	0.775079	1.19088	0.522646	0.725657	1.10404	1.1606	0.879799	0.615469	0.413285	0.868604	1.17403	1.00745	1.59945	1.56144	0.829383	0.862117	1.28837	1.2864
700	chr2	170444092	171083939	1.2484	0.882048	0.881204	0.70931	0.945143	0.299758	1.11795	0.431105	0.638803	0.73661	1.22146	1.38395	0.789779	0.567564	0.794201	0.840466	1.43295	1.09999	1.09032	1.15557	0.978669	0.841263	0.795707	1.25303	1.36755	0.943057	1.30909	0.999282	1.06196	1.22426	0.538439	0.785118	0.837427	1.07782	0.902963	0.523396	0.365525	1.09775	0.917972	1.01695	2.02255	1.16912	1.07756	0.908555	1.1597	1.31238
701	chr2	171083940	171664143	1.23011	0.770673	0.820123	1.25787	1.02388	0.451809	0.935137	0.624881	1.27616	0.669134	1.23481	1.06005	0.911183	0.499085	0.646693	0.944626	0.985907	1.08476	1.14389	0.896457	1.15045	1.05571	1.17148	0.955849	0.986684	1.01029	0.827387	1.19154	1.07514	1.16522	0.585799	0.868954	1.21065	0.973959	1.06519	0.573834	0.770498	0.504679	0.567516	1.19308	1.30051	0.59794	1.36008	1.03447	1.14987	1.12604
702	chr2	171664144	172256578	1.20147	0.490296	0.936723	1.07188	0.843126	0.375385	0.919484	0.656613	0.894109	0.624242	1.31108	1.23148	0.975474	0.492454	0.950878	0.833473	1.38976	1.11871	1.22753	0.958275	0.969166	1.1857	1.30058	1.06931	1.25574	1.17112	1.16421	1.14858	1.04509	1.02491	0.338	1.17402	1.32256	1.12169	1.03046	0.340364	0.996706	0.644059	0.595916	1.06679	1.05391	0.653985	0.933234	1.17873	1.27837	1.34228
703	chr2	172256579	172837899	1.17927	0.729873	0.592687	1.04852	0.781611	0.304706	1.07769	0.675592	0.962788	0.690903	1.25664	1.37092	0.826852	0.584721	1.01306	0.880871	1.228	0.935059	0.909536	1.10469	0.966512	1.00086	1.60734	1.21488	1.06694	1.06772	0.967604	1.43265	1.0484	1.17156	0.397356	0.805084	1.0402	1.17559	0.935452	0.439772	0.608272	0.632181	0.643448	1.42906	0.727056	0.464209	0.85472	1.62444	0.85127	1.0539
704	chr2	172837900	173373055	1.19739	0.429011	0.77213	0.986832	0.872702	0.513404	1.02732	0.50194	0.724438	0.756651	0.60575	0.994245	1.14014	0.537333	0.896598	0.717014	1.22383	0.771115	1.06042	0.921023	0.915862	0.874613	0.676613	1.20947	1.0487	0.840011	1.11411	0.706147	0.784692	1.00879	0.534193	0.828226	0.755814	0.964256	0.819896	0.527188	0.4423	0.529783	0.496511	1.046	1.22091	0.538698	1.01246	0.638801	1.12377	0.780433
705	chr2	173373056	173922524	1.07411	0.481851	0.860668	0.832884	1.03147	0.594615	0.939088	0.663218	0.816797	0.724691	1.05873	1.1187	0.998762	0.450813	1.12671	0.776346	1.51963	1.08147	1.18693	1.04001	0.929885	1.44324	1.43707	1.14295	1.01141	1.32323	0.743079	0.903167	1.03026	1.12237	0.551581	0.919322	1.40245	0.96343	0.898178	0.418591	0.546027	0.57494	0.728412	0.802157	1.69739	0.475792	1.23935	1.16412	0.716569	1.56475
706	chr2	173922525	174488297	0.968507	0.696254	0.874465	0.782934	0.917951	0.459959	1.17103	0.604696	0.638567	0.935863	0.995351	1.09092	0.787697	0.629323	0.952974	0.845919	1.10703	1.06951	0.994656	0.993791	0.980994	1.29912	1.38731	1.09915	1.05273	1.19415	1.03829	0.741392	0.85041	0.988649	0.729507	1.09111	1.09693	0.971275	0.852714	0.49484	0.445104	0.789622	0.6994	0.941415	1.58988	0.550882	1.01661	1.0859	1.08706	1.27518
707	chr2	174488298	175042378	1.18572	0.684669	0.948037	0.853722	0.987198	0.491064	0.980344	0.723582	0.967967	0.665484	0.712516	1.0175	1.08436	0.698068	0.856092	0.750622	1.4804	1.04012	0.729359	0.820392	0.812173	1.30985	1.34513	1.17982	1.14435	0.933148	0.882193	0.857823	0.873222	0.879661	0.545301	0.989556	0.825505	0.820214	0.849728	0.496669	0.455065	0.681703	0.768522	1.10364	2.43151	0.820179	0.751099	0.930511	1.02046	1.17161
708	chr2	175042379	175633749	1.16679	1.23956	0.933479	1.06696	0.935324	0.228049	0.759632	0.657177	0.769514	0.619683	1.04601	0.673747	0.990485	0.612054	0.887217	0.917955	1.06613	1.01628	0.591921	1.10359	0.729873	1.05269	1.00318	1.21031	1.35489	1.08027	1.10358	0.858602	0.893536	1.03694	0.547609	0.974283	0.940918	0.93909	0.886622	0.409287	0.740007	0.775677	1.21923	0.796013	1.90389	1.36392	1.20636	0.735041	0.850597	1.47295
709	chr2	175633750	176213231	1.18243	1.14346	0.894041	0.858037	1.21274	0.47656	0.751254	0.458672	1.02226	0.516419	1.00739	1.04389	0.789006	0.642838	0.892878	0.961837	1.34872	0.803488	0.71168	1.27301	0.89364	1.17769	0.952779	1.0662	1.11926	0.703153	0.892755	0.902832	0.775325	1.02847	0.682196	0.851926	1.1654	1.11086	1.02111	0.53174	0.944262	0.746092	1.17379	1.02419	2.20464	1.69847	1.12244	1.16961	0.972865	0.6683
710	chr2	176213232	176781369	1.06358	1.24847	1.18226	1.01526	0.758013	0.312933	0.9426	0.751654	0.879666	0.448007	1.41242	0.455115	0.903146	0.659849	1.17567	0.803174	1.237	0.898526	0.936846	1.14212	0.97668	1.3968	1.03773	1.36467	0.935811	0.964823	0.828089	1.24222	0.836857	1.10708	0.627591	1.02651	1.21258	0.934689	1.00625	0.488333	0.661794	0.808513	1.35958	1.18926	1.88623	1.38557	1.24047	0.940031	1.04812	0.669029
711	chr2	176781370	177396277	1.17346	1.23228	1.29919	1.2221	0.879374	0.374247	0.900611	0.38769	1.03486	0.475518	1.79234	0.845818	0.80788	0.566808	1.38599	0.837624	1.26758	0.696087	1.03137	1.16765	0.863781	0.945467	0.882241	1.34773	1.04631	0.595026	1.01878	1.17088	0.770516	1.11974	0.523611	0.792641	1.13723	0.899471	0.806966	0.52469	0.251096	0.74645	0.82873	0.995308	1.59777	1.37194	1.03517	0.930649	1.04201	1.28797
712	chr2	177396278	177924744	1.26238	0.873555	1.21789	1.05797	1.02555	0.246326	0.931152	0.376166	1.03618	0.539439	1.42712	0.945519	1.06442	0.685096	1.1298	0.95269	1.26878	1.01583	1.11561	0.929708	0.918474	1.21684	0.725392	1.33494	1.31968	0.866561	0.734395	0.925989	0.86827	0.850903	0.42875	0.855262	1.27572	1.01797	1.16114	0.328362	0.503565	0.721846	1.33889	1.09992	1.22119	1.40126	0.875337	1.0967	1.02964	1.22494
713	chr2	177924745	178500109	1.16781	1.11217	0.877779	0.614336	0.96481	0.304209	0.838325	0.693605	0.791759	0.651662	1.60888	0.930357	0.657432	0.529586	1.20179	0.968316	1.12455	0.928619	1.29076	0.890461	0.941921	1.1638	1.27225	1.3576	1.06303	0.720415	0.921263	0.83454	0.743689	1.05973	0.581058	0.768327	1.22593	1.05334	1.06648	0.464295	0.413631	0.630107	1.379	0.919907	1.01567	1.37632	1.04159	0.953758	0.726688	0.644322
714	chr2	178500110	179081684	1.09692	1.21637	1.0886	0.868757	0.819026	0.375397	0.868287	0.518756	0.752554	0.574908	1.5678	0.918421	0.913611	0.630617	1.20239	0.946971	0.897939	0.948046	0.722503	0.926083	0.786945	1.05292	1.05178	1.14454	1.01522	1.14673	1.01733	1.0966	0.859084	0.880045	0.614054	0.982284	1.01944	0.838247	1.0106	0.541042	0.638347	0.854687	1.31633	0.883882	1.39831	1.5447	1.18047	1.07445	0.98362	0.930437
715	chr2	179081685	179614332	0.747509	1.31104	0.916825	1.15284	0.970601	0.71109	0.909954	0.533107	0.843014	0.758886	1.63868	0.983336	0.884345	0.766881	1.15981	1.04774	0.873234	1.03418	1.00909	0.712309	0.82558	1.14644	1.08733	1.41426	1.10642	1.19265	1.06965	1.12225	0.9713	1.00897	0.627846	0.972613	1.30883	1.05865	1.23099	0.841339	0.346281	0.643228	1.12172	0.961287	0.717523	1.34345	1.06583	0.893662	0.960767	1.25417
716	chr2	179614333	180228551	1.0525	1.22444	0.987777	0.820068	0.992981	0.71969	0.938304	1.2752	1.27136	0.890213	1.59911	1.08393	0.856456	0.840131	0.971297	1.01901	0.556538	1.0999	1.03147	1.29492	1.00013	1.19073	1.2549	0.946699	0.764289	1.06521	0.786086	0.711684	0.924768	1.07042	1.04804	0.853956	1.39416	1.01309	1.03356	0.938071	0.421705	0.922899	1.17699	1.02016	0.927974	1.25852	0.816507	1.03869	0.981656	1.54625
717	chr2	180228552	180821137	1.17976	0.732265	1.0649	0.813878	0.780172	0.733782	0.820571	0.733774	0.963442	0.850684	1.46605	1.18793	1.07946	1.04396	0.992377	1.04026	0.992646	1.1102	0.87177	1.01304	0.832713	0.655552	1.28393	1.25652	1.03074	1.25347	1.21622	0.775645	1.05872	1.0333	1.19665	1.28635	1.0693	1.05193	0.993249	0.892981	0.721455	0.619618	1.00973	0.799759	1.92775	0.667445	0.84163	1.23397	1.05543	1.27276
718	chr2	180821138	181430318	1.11307	0.681581	0.907734	1.14147	0.744606	0.934006	1.01648	1.16742	0.760456	0.955227	1.7804	1.26693	1.13845	1.20912	1.10513	0.945485	0.942696	0.751367	0.954126	0.850094	0.885187	1.02916	1.27813	1.35759	0.899852	1.31437	0.749542	0.905574	1.13052	1.15993	1.00963	1.0655	0.916902	1.00838	0.964853	0.953729	0.621166	0.415924	0.879431	0.975149	1.5651	0.2836	0.933948	1.15607	1.20731	1.0851
719	chr2	181430319	182040107	0.860906	0.628007	0.922358	0.818669	0.991699	0.819126	0.820563	1.16198	1.046	0.915657	1.19987	1.09081	0.830799	0.974771	1.08282	0.933635	0.944974	0.916723	0.713944	0.720966	0.824926	1.04351	0.914897	1.33493	0.83277	1.29125	1.0137	0.762958	1.00269	1.00975	1.27423	0.915966	1.02372	1.04432	1.04923	1.01098	0.661866	0.422446	0.671935	1.03733	1.23775	0.26706	1.07197	1.18788	1.11166	1.53342
720	chr2	182040108	182629546	0.88336	0.742914	1.07889	0.934771	0.841409	0.913531	0.740869	0.778993	0.897895	1.0027	1.56767	1.13422	0.777205	0.903379	1.10477	0.974986	0.884637	0.776001	0.805988	0.9764	0.909918	0.886588	0.798777	0.967128	0.936977	1.03008	0.753167	0.969811	0.916825	1.0191	0.865813	1.10914	0.791342	1.16064	0.833651	0.958804	0.76044	0.421534	0.515923	0.703068	0.942644	0.217793	0.727829	1.0383	1.01661	1.06184
721	chr2	182629547	183214345	0.793577	0.556138	0.992547	1.0449	0.822904	0.729551	0.778982	0.909964	1.38469	1.03785	1.49266	1.13349	0.844389	0.787219	1.04963	1.00305	0.606311	0.857184	0.650973	0.923775	0.966942	1.15505	0.976571	1.23163	0.854996	1.24027	0.818752	1.0186	0.725179	1.34155	0.952807	1.30303	0.814914	1.01903	1.13546	0.866302	0.297666	0.513091	0.733161	0.943099	1.25132	0.27266	1.0204	0.98864	0.946097	1.66215
722	chr2	183214346	183814390	1.13113	0.579432	1.0189	1.02722	0.955933	0.943326	0.905854	0.846828	1.15523	0.950344	1.46998	1.05223	0.843988	0.959473	0.940381	1.0649	0.935669	0.926039	1.1226	1.11952	0.86205	1.17143	1.22243	0.909817	1.1493	1.48479	1.00478	1.22052	0.895305	1.20596	1.07519	0.905153	1.55003	1.13025	0.99973	1.00974	0.422585	0.561347	0.592815	1.09893	1.62999	0.27902	0.887272	1.33679	1.12981	1.30267
723	chr2	183814391	184443300	1.15118	0.7275	0.951107	1.32918	0.944232	0.81965	0.764481	1.1961	1.02372	0.967025	1.72737	1.08868	1.03294	0.779438	0.930102	1.07707	0.892273	1.02035	0.888214	0.997203	0.821253	1.07391	1.48201	1.2948	0.948197	1.23363	0.998781	0.852288	1.02444	1.18736	1.16069	0.754296	1.08993	1.01851	0.924244	0.851619	0.538992	0.358825	0.541047	0.817002	0.452575	0.343444	0.801744	0.780377	1.20542	1.19204
724	chr2	184443301	185119413	1.13503	0.475033	1.08823	1.15958	1.08754	0.865016	0.930525	1.15295	1.33314	1.08136	1.46698	1.16692	1.20293	1.02809	1.067	1.12391	0.570295	1.02477	0.908326	1.05103	1.05831	0.967187	0.935771	1.15381	1.17951	1.05187	0.930062	1.09505	0.943052	1.21878	1.20402	0.924024	0.810235	0.990071	1.10729	1.11159	0.639369	0.494708	0.576646	0.847332	0.917513	0.450231	1.11401	1.15548	0.956568	0.982693
725	chr2	185119414	185776336	1.01752	0.672317	1.18286	0.94856	1.02192	0.855805	1.0167	1.08838	1.00078	1.12922	1.50568	1.05543	1.27464	1.14758	0.949885	1.06881	0.414003	1.13895	0.97282	0.893093	0.869492	0.915838	1.2896	1.40525	0.934761	1.39346	1.10394	1.22897	0.832482	0.890555	1.31004	1.07754	0.985644	0.97736	0.955434	0.996836	0.628121	0.549804	0.554983	0.868942	0.805993	0.495548	0.742642	1.10498	1.06655	1.02128
726	chr2	185776337	186457007	0.980323	0.613835	0.854996	0.881303	0.743099	0.894546	0.894302	1.19965	1.03537	1.05189	0.911675	1.04125	1.05351	0.784291	0.804129	0.970422	0.788749	1.07819	1.14716	0.993843	0.933717	1.00949	1.2659	1.12118	1.05217	1.42767	0.951836	1.14657	1.11517	0.917692	1.08838	0.80597	0.969963	0.913988	0.883457	0.95133	0.676624	0.472597	0.610263	0.758346	1.50841	0.374915	0.824805	0.867851	0.737658	0.974356
727	chr2	186457008	187101844	0.911269	0.797586	1.11095	1.02838	0.84672	0.914644	0.754622	1.08391	0.87838	1.10311	1.23079	1.12553	0.947678	0.908432	0.91957	0.993942	0.955146	1.09977	1.02087	1.16495	0.975945	0.937897	0.927903	1.18549	0.914299	1.34501	0.973971	1.15135	0.890011	0.859517	1.03682	0.874096	1.08844	0.973256	1.06914	1.07489	0.78699	0.605132	0.31965	0.910667	1.27535	0.353714	0.918491	0.927228	1.27745	1.11034
728	chr2	187101845	187690034	0.961471	0.541831	0.939403	1.03763	0.862791	0.478451	0.778937	1.24045	1.0285	0.983519	1.03615	1.48781	1.12999	0.869051	0.803595	0.987047	0.532572	1.13398	0.887032	0.977878	0.966807	1.0423	0.798055	1.18947	1.08074	1.03091	0.725961	0.872735	0.896762	1.06634	1.07936	1.13816	1.03722	1.01422	0.794268	0.901232	0.66114	0.632722	0.535488	1.05238	1.00028	0.365437	0.97819	1.15511	1.06879	0.58154
729	chr2	187690035	188318857	0.858839	0.639368	1.27238	0.578171	0.879068	0.970054	1.34704	1.01963	1.19333	0.965364	1.36726	0.90806	1.32383	0.926101	1.01342	1.00828	0.562298	1.19238	1.09331	0.775105	0.918029	1.22832	0.839618	1.31972	1.0313	1.21629	1.05705	1.11163	0.813221	1.15732	1.04124	0.831991	1.04138	1.04703	1.02606	0.898057	0.400588	0.473942	0.365071	0.905192	1.3739	0.324428	1.0517	1.25828	1.09326	0.946796
730	chr2	188318858	188967314	0.849993	0.567221	1.26243	1.1559	1.00532	0.762385	1.08943	1.12114	0.794973	1.18488	1.18122	0.895154	1.1975	0.95187	0.841645	0.909457	0.951106	0.985279	0.845354	0.875582	0.932519	0.931907	1.55933	1.20655	0.811227	1.16959	1.20125	1.03033	0.888496	1.05763	1.07928	1.0308	0.817331	0.962637	0.860363	0.927181	0.50216	0.519676	0.629146	1.0735	0.939833	0.28795	1.07584	1.62285	1.07682	1.13928
731	chr2	188967315	189597653	0.617774	0.690623	1.3512	0.949342	0.962864	0.873965	1.05024	1.20411	1.07771	0.946845	1.32219	1.29092	0.928587	0.835306	0.728927	0.879657	0.974284	1.09593	0.921348	0.759046	0.943945	1.17708	0.930871	1.30137	1.17173	1.37457	0.939055	0.787998	0.980867	1.19437	1.11043	0.808826	1.1469	0.900666	0.91193	0.713694	0.253853	0.627957	0.548118	0.946552	1.2611	0.392789	0.93638	0.952797	0.870683	1.46072
732	chr2	189597654	190194874	1.1103	0.523859	1.10994	0.861309	1.07979	0.891785	0.897355	1.11325	1.11472	0.908649	1.15708	0.840032	0.957754	1.36235	1.06981	0.866415	0.417917	0.728457	1.22952	0.801994	0.90993	0.975193	1.17654	1.57359	1.01539	1.4629	1.19964	1.10361	0.847419	0.883475	0.93744	0.582796	1.06726	0.833499	1.08897	0.590226	0.750863	0.557392	0.418038	1.12816	1.48105	0.223376	0.736082	0.933879	0.815295	1.03427
733	chr2	190194875	190809906	1.08335	0.649457	0.887679	0.918192	1.06499	0.803728	0.792938	1.06261	0.919369	0.926462	1.19041	0.93199	0.984897	0.916759	0.894628	0.832641	1.03045	1.0779	0.936995	1.11916	0.98434	0.628342	1.0535	0.985462	1.02935	1.11669	1.07497	1.00302	0.927002	1.00233	1.02863	1.01371	1.1247	0.93273	1.21502	0.978629	0.582439	0.539458	0.673587	1.1143	0.460443	0.308117	0.657184	0.841916	1.00641	0.79045
734	chr2	190809907	191405676	1.2283	0.645708	0.693426	1.04951	1.05078	1.10373	0.89178	0.950928	1.00226	0.836022	1.15845	1.26774	0.931596	0.923793	1.12783	1.0266	1.10814	1.04091	1.33299	1.14211	1.06719	0.947163	1.10309	1.46546	0.915438	1.0933	0.827082	0.83151	0.917807	1.08238	0.951652	0.912312	1.17604	0.989858	1.0346	0.943221	0.462135	0.650838	0.404942	0.989622	0.859686	0.405854	1.14943	1.10818	1.15492	0.673672
735	chr2	191405677	191967137	1.0757	0.446266	0.958632	0.898114	0.81988	0.850639	0.891769	0.933533	0.982543	0.854491	1.44487	0.962353	0.75395	1.25676	0.810883	0.937028	0.733717	0.782525	0.667958	1.17844	0.876945	0.948666	1.30775	1.14696	1.20638	1.14299	1.01402	1.01717	0.79191	1.14021	1.02369	0.852654	0.997402	0.872625	0.882742	0.914878	0.723621	0.469633	0.616875	0.885324	0.870469	0.257854	0.868571	1.07513	0.865264	0.631646
736	chr2	191967138	192506509	1.20159	0.711659	0.901701	1.36365	0.691655	0.584617	0.945961	0.890921	1.09597	0.936054	1.00721	0.90976	0.840786	1.21337	0.889734	1.05552	0.933601	0.813728	1.04962	0.979629	0.946202	0.782817	1.1273	1.21534	1.05019	1.4775	0.940369	0.952127	0.785094	0.781135	0.800558	0.989669	1.41622	1.08596	1.09769	0.861232	0.643766	0.574237	0.707301	0.841502	0.930272	0.248389	0.806942	0.876112	1.13777	0.599082
737	chr2	192506510	193081809	1.24674	0.600242	0.980728	1.07372	1.04289	1.12021	1.0443	0.766018	0.90673	0.927588	1.25923	1.25284	0.938538	1.1686	0.602366	0.952954	1.32122	0.94384	0.952876	0.774223	0.985155	0.764922	0.799905	0.991637	0.93018	1.36686	0.937193	0.928333	0.807126	0.842658	0.904339	0.772604	1.06858	0.939628	0.881098	0.818371	0.736367	0.553363	0.597888	0.802725	0.624444	0.322128	0.875819	0.782039	0.898724	0.792659
738	chr2	193081810	193742340	1.26456	0.686218	1.11581	1.0128	0.915981	1.02749	0.923083	0.766802	1.00995	1.08881	1.03651	1.20851	1.20485	1.17738	0.418443	0.927398	1.44347	0.85526	0.727946	1.06749	0.851213	0.853178	1.45563	1.42501	1.09028	1.48792	0.860103	0.759449	1.22142	0.702784	0.813133	0.860138	1.30295	1.02038	0.706732	0.781225	0.818938	0.540325	0.478731	1.12445	1.31927	0.285826	0.826942	0.808801	0.763417	1.00661
739	chr2	193742341	194427483	1.16536	1.01461	0.903034	1.16856	0.905223	1.3215	0.85982	1.11846	0.941785	1.12847	1.26037	1.24049	1.24921	1.15298	0.747164	0.925305	1.02731	0.979938	0.919709	0.828856	0.978576	1.04724	1.25961	1.23529	0.994981	1.22138	1.30971	1.25314	1.10518	0.730336	0.84612	0.868652	0.599805	1.01097	0.891438	1.0153	0.840939	0.736792	0.97521	1.15775	0.636254	1.12519	1.08236	0.971936	0.779	0.886802
740	chr2	194427484	195109836	1.03871	1.30663	1.07853	1.10081	0.960559	1.14317	0.783881	1.20823	0.86348	1.02726	1.30251	1.02368	0.773332	1.10381	0.855248	0.790448	0.666636	0.903125	1.14529	0.882769	0.876953	1.09817	1.2746	1.11677	1.00971	1.24591	0.858817	1.12086	0.852142	0.685816	1.15073	0.83063	0.940717	0.921829	1.12196	0.942579	1.08037	0.893989	1.21337	0.974213	0.646231	0.779452	0.879702	0.756579	1.10526	0.847831
741	chr2	195109837	195769820	1.15607	1.17886	1.27659	1.52608	1.02125	1.01827	0.911163	0.714843	0.784426	1.23715	1.48575	1.25703	1.06223	1.39109	1.24367	0.81584	0.792637	1.07898	1.20329	0.818086	0.81238	1.09259	1.29385	1.17296	0.944338	1.40463	0.952161	0.927339	1.03011	0.665964	1.02877	0.973256	0.892309	1.00244	1.13861	1.11998	1.2081	0.824185	1.09243	0.81723	1.20831	1.07251	0.933085	0.998209	0.830689	1.16595
742	chr2	195769821	196384189	1.04821	1.32854	0.865532	1.47024	0.991273	1.28878	0.862881	0.861014	0.978712	0.986108	1.46642	1.36653	1.08085	1.15143	1.10807	0.845822	1.23615	0.787917	0.834318	1.2313	0.983495	0.809163	1.27592	0.969084	0.949579	1.35333	0.879742	1.00918	1.00768	0.995541	0.812933	0.856477	0.738449	0.953551	0.900547	0.871197	0.920946	0.824104	1.58912	0.973047	1.49306	0.800314	0.691454	1.16081	1.02632	0.785305
743	chr2	196384190	196993055	1.24108	1.27895	0.771529	1.37359	0.842508	0.823135	0.769745	1.03811	1.5058	1.03379	1.55847	1.24404	1.09626	1.08518	1.03905	0.896113	0.792354	1.03045	1.07764	1.36058	1.0667	1.28774	0.994998	1.14726	1.16961	1.19024	1.17233	1.17003	1.18308	0.98515	0.972079	0.710245	0.899904	0.950158	1.10981	0.977814	1.72794	0.900655	1.4524	0.919513	1.78616	0.993096	1.02848	0.989721	1.09465	0.964086
744	chr2	196993056	197578321	1.23734	1.20708	0.788139	1.39795	0.864927	1.15209	0.861342	1.15708	0.657546	1.24079	1.2773	1.0794	1.12851	0.801271	1.06649	0.970487	0.835951	0.741396	0.992849	1.10314	1.00588	0.927555	0.894559	1.20397	1.17526	1.43999	0.974528	1.08366	1.07263	1.08538	0.865052	0.931316	1.27491	0.986937	1.01135	1.01835	0.965252	0.772555	0.876614	1.47352	1.59541	0.888674	0.983541	0.908049	0.978289	1.10794
745	chr2	197578322	198147555	1.12295	1.35094	0.918433	0.941958	1.27468	1.0427	0.714943	1.28618	0.818244	1.4036	1.45358	1.25184	1.12649	1.05525	0.938309	0.892795	0.954813	0.95566	0.87687	1.11992	0.906759	0.902716	1.43898	1.01297	1.05787	1.22092	1.00618	1.01301	1.13441	0.866797	0.98303	0.823846	1.0032	1.09519	1.14541	0.960454	0.952816	0.70852	1.37319	0.78644	0.797055	1.25819	0.915594	0.760018	0.961787	0.694523
746	chr2	198147556	198762589	1.11787	1.36117	0.950284	0.979645	1.10814	0.825176	0.806672	1.18279	1.18585	0.992747	1.06174	0.844662	1.05118	1.39955	1.07199	0.948912	0.878819	0.89289	0.708623	0.88785	0.868121	0.887376	1.57317	1.11724	1.10035	1.58926	0.883513	0.9796	0.875017	0.861409	1.00342	0.67745	1.17569	1.02861	1.19596	0.877647	0.759355	0.781252	1.11237	0.72984	1.74434	1.01895	1.21361	0.86831	0.949886	0.924169
747	chr2	198762590	199332897	1.10189	1.22087	0.931501	1.0691	1.08127	1.01591	0.830049	0.849906	1.04112	1.19535	1.59633	0.647304	0.997017	1.13895	0.997558	0.948837	0.808999	1.19184	1.21282	0.77608	0.976294	1.22117	1.0483	1.1704	0.855496	1.72562	1.03987	1.09698	1.16507	0.99505	0.995531	1.04761	0.873423	1.1272	1.1754	0.999494	0.680095	1.12792	1.3207	1.07112	1.11855	1.30669	0.971989	1.392	1.18733	0.884643
748	chr2	199332898	199954409	1.03182	1.16515	1.20857	0.911337	1.03253	1.00283	0.955629	1.13396	0.785259	1.07142	1.32259	0.899929	1.06311	1.05203	0.982243	0.96586	1.05272	1.23713	0.681683	1.22103	1.11576	0.747129	1.01583	1.25091	0.987449	1.26859	0.736539	0.649106	1.14929	0.81506	1.12687	1.00724	1.13075	1.11682	1.02623	0.964906	0.575767	0.825498	1.41352	0.697829	1.25698	0.873153	1.04873	0.798488	1.18783	0.702794
749	chr2	199954410	200535472	1.20761	1.24403	0.952666	1.35009	1.29886	0.995123	1.04485	0.878171	1.34208	1.20388	0.809254	0.98337	0.72446	0.954436	1.16463	1.1006	0.660498	1.12465	1.1884	1.4001	0.82863	0.847488	1.45724	1.03116	0.961189	1.20527	0.897871	1.07693	0.956092	0.956066	0.931076	0.95536	1.1819	1.07016	1.38445	0.970141	0.527203	0.949785	1.37684	1.17189	1.27754	1.25999	0.821229	0.66817	1.21539	0.552071
750	chr2	200535473	201105347	1.26139	1.20802	0.861243	0.699573	1.00327	1.31031	0.934981	0.815255	0.743364	1.04761	1.12554	0.911806	0.951506	1.22369	1.11648	1.09664	1.04651	1.34263	0.854286	1.30503	1.03081	0.803679	1.38093	1.2168	0.98358	1.30696	1.0268	0.924021	0.993974	0.88033	1.25616	0.882945	1.15871	1.09289	0.95132	0.849703	0.531677	0.924177	1.19342	1.0086	1.05084	1.1365	1.0439	0.814681	0.831587	0.96291
751	chr2	201105348	201640817	0.929898	1.17342	1.12191	1.25086	0.931522	1.09263	0.868687	0.89983	1.01896	0.954288	1.28532	1.05314	1.17905	1.21007	0.92991	1.0275	0.895487	1.20555	0.995992	1.13349	0.960325	0.965535	1.29367	1.03691	1.1756	0.980061	1.01358	0.762865	0.992981	1.06243	1.04407	0.80812	1.24235	1.08431	0.819452	0.901778	0.799453	0.880307	1.31247	1.08322	0.871075	1.02703	0.820468	0.682608	1.18463	1.35688
752	chr2	201640818	202243835	1.01298	1.19617	1.02537	1.15889	0.845565	1.12736	0.652885	0.951549	1.04622	0.921147	1.03921	1.16566	1.04016	0.917758	0.926617	0.980201	1.1753	0.970509	0.953297	0.814616	1.00778	1.36686	1.03336	1.19455	1.00589	1.35526	0.860935	0.846766	0.80374	0.972685	0.987808	0.843015	1.13186	1.05883	0.986302	1.06139	0.388468	0.852805	1.25826	0.74973	0.689674	1.18123	1.22909	1.104	0.984673	0.992216
753	chr2	202243836	202819225	0.984775	1.25566	0.97586	0.988885	0.94747	1.1775	0.871285	0.742548	0.800133	0.960596	1.23639	0.848457	1.08061	0.927383	0.85337	0.87345	1.03894	0.847944	0.964165	0.862796	0.839343	1.17827	1.0967	1.35848	1.17638	1.36037	0.884772	1.03786	0.920098	1.12949	0.827983	1.11498	0.971167	1.0024	1.14901	0.932664	0.481156	0.847425	1.25211	1.21583	1.49763	1.12175	0.537478	1.09674	0.78901	1.01446
754	chr2	202819226	203379382	1.0244	1.10771	0.749809	0.708187	0.791047	1.12177	0.821956	0.801309	0.693227	0.934909	0.937784	0.991354	1.06004	0.90049	1.07202	1.11536	0.818263	0.773608	0.90954	1.17146	0.931262	1.30759	0.994453	1.19775	1.10198	1.18781	1.06025	0.933758	0.9923	1.06376	0.858579	0.773561	1.13663	0.96325	1.07212	0.817266	0.676624	0.726244	1.36146	0.814194	1.40548	0.812499	0.815924	0.75063	1.26321	0.801805
755	chr2	203379383	203988825	1.17615	1.21851	0.906339	1.19882	0.757973	1.21889	0.65291	1.05425	0.780521	0.643793	1.06438	1.06897	1.53222	0.88984	0.713505	0.953151	0.836194	0.909979	1.02501	0.810224	0.8441	0.927239	1.07607	1.02464	1.15242	0.852422	0.898422	1.0595	1.01416	1.09699	1.15226	0.986518	1.03068	0.95114	1.0937	0.847841	0.54602	0.798583	1.1893	1.0197	1.06319	1.06835	1.14862	1.03407	1.00489	0.938112
756	chr2	203988826	204595178	1.06839	1.01013	0.93792	1.12464	1.04119	1.11618	0.734078	1.00989	1.02721	0.680466	1.29669	1.10928	1.08552	1.19052	0.849844	1.03554	1.05759	0.874806	1.02299	1.00963	0.923347	0.998091	1.19304	1.17946	1.42645	1.03152	0.855808	1.20351	0.916163	0.787824	0.914137	0.663194	0.70116	1.02191	0.826942	0.887638	0.363601	1.08489	1.13433	0.872348	0.938623	0.9277	1.06676	1.08536	1.38639	1.03865
757	chr2	204595179	205122691	1.03918	1.21307	1.02949	0.91243	0.977539	0.98235	0.7418	0.881391	0.559737	0.701744	1.18378	0.941534	1.09613	1.12397	0.893686	0.891339	1.1373	0.830769	1.23578	0.854548	0.885719	0.928605	1.31422	1.1451	0.816734	1.24671	0.836496	0.866404	0.821269	0.815289	0.916365	0.992657	1.11833	1.07138	0.988048	0.833663	0.70536	0.881638	1.2483	1.10084	1.37566	0.989474	1.0704	0.930855	0.790914	0.610269
758	chr2	205122692	205664049	1.10534	0.900477	0.906177	1.11348	1.01675	1.12427	0.916077	1.06231	0.977752	0.845917	1.41989	0.795837	0.727741	1.00144	0.949237	0.962053	0.856765	0.999512	0.824894	1.24476	0.858129	0.732795	1.35314	1.36901	1.10401	1.52394	1.09612	1.20626	0.820845	0.980473	0.881314	0.692684	0.703992	1.14856	1.109	0.917485	0.506235	0.954126	1.31226	1.12141	0.934918	1.24517	1.49063	0.549964	1.06913	1.01801
759	chr2	205664050	206248399	1.15103	0.932981	1.03144	1.10575	0.723577	1.19217	0.9646	0.813428	0.871323	1.09832	1.24197	1.36461	1.10945	1.18642	1.06143	1.1012	0.899876	1.0852	0.97276	1.13302	1.10368	0.879142	1.45096	1.5266	1.00725	1.10787	1.12367	1.09348	0.926409	0.985177	1.1471	0.853107	1.12564	1.26293	1.00322	1.02732	0.59058	0.810354	1.14451	0.869928	1.45706	1.23279	0.750636	0.97016	0.882174	1.41258
760	chr2	206248400	206775185	1.51202	1.03774	1.66593	1.24173	1.07584	1.36616	1.57027	0.991855	1.08172	1.50634	1.36591	1.73081	1.37417	1.29467	1.2028	1.3086	1.17044	1.28522	0.885933	0.745753	1.46068	0.965032	1.82153	1.28131	1.00397	1.13042	1.35207	1.12858	1.40881	0.927005	1.36581	1.01504	1.03128	1.54947	1.71195	1.40633	0.457896	0.819433	0.983139	0.805807	1.09127	1.22609	1.24398	1.03927	1.0912	1.24932
761	chr2	206775186	207360490	1.26121	1.13636	1.38199	1.02964	0.788162	1.28167	1.09202	1.07897	0.885377	1.18898	1.23354	1.25009	1.07219	1.28207	1.22563	0.963391	1.50315	1.45999	1.27134	0.760621	1.23116	1.31134	0.944058	1.34931	1.07391	0.97495	1.04614	0.804621	0.87794	1.13872	1.04977	0.872477	1.11086	1.36331	1.30016	1.31011	0.517714	0.814953	1.40721	1.04214	0.92336	0.950963	1.10385	1.10401	0.891509	0.972882
762	chr2	207360491	207937130	1.23884	0.996177	1.15385	1.04502	0.881148	1.11736	0.990165	1.00806	0.882018	0.812053	1.32198	0.957112	1.22123	1.04894	1.06237	0.813794	1.41562	1.0266	1.09207	1.1368	1.03121	1.12559	0.80298	1.41997	1.05997	1.08607	1.01028	1.17064	1.05987	1.2484	0.849988	0.977343	1.02936	1.05698	0.94056	1.03582	0.747633	0.956606	1.0459	1.41123	0.8873	1.16365	1.10571	1.12889	1.14484	0.712352
763	chr2	207937131	208478443	0.806321	1.13297	1.41742	1.00588	0.806695	1.37385	0.805296	0.980682	1.03127	1.05179	1.08744	0.766492	1.11132	1.08233	1.0817	0.895334	1.3751	1.17532	0.968156	1.02767	0.860988	0.851578	0.9342	1.11631	1.1089	1.10252	0.997817	0.798502	0.807203	0.646332	0.827837	0.961095	1.01191	1.04408	1.06328	0.934481	0.524835	0.739351	1.44983	0.853789	0.593058	1.07699	1.07613	1.08557	0.921754	0.85284
764	chr2	208478444	209044578	1.00618	1.00632	0.93263	1.15841	0.89595	0.979778	0.801955	0.817991	0.644475	0.811919	1.22519	1.37682	0.963082	1.02547	0.916102	0.94768	1.06778	1.16242	0.824625	0.777161	1.07325	0.930314	0.752071	1.25636	0.698994	1.29318	0.880265	1.10097	1.08328	0.992672	0.928867	1.00263	1.29566	0.99157	1.26604	0.840169	0.7906	0.879542	1.59871	1.15663	1.1068	0.950511	1.24073	1.04337	1.0858	0.761859
765	chr2	209044579	209665572	1.08719	1.07389	1.12012	0.815963	0.719342	1.1058	0.848746	1.28077	1.08244	0.910736	1.23659	1.14688	1.06601	0.973473	1.03396	0.842473	1.27255	1.33525	0.914767	1.37838	0.910539	0.944137	0.917041	1.08643	1.11972	1.27759	1.29171	1.109	0.938292	1.21806	0.894989	0.909513	0.797579	1.17809	1.12248	0.8935	0.392144	0.794458	0.99544	0.953086	0.948798	1.0213	0.81682	1.19945	0.78196	1.12421
766	chr2	209665573	210327104	1.1204	1.29733	1.13939	0.840011	1.13246	1.43745	0.84562	0.988899	1.03238	0.763494	1.31994	1.21066	1.03149	1.01677	1.04912	0.869118	1.21469	1.50152	1.18037	1.35852	0.934123	1.06664	1.09488	1.36062	1.12359	1.27355	1.10442	0.896062	1.02097	1.1655	0.842836	1.1891	1.09783	1.03366	1.0715	0.884352	0.661797	0.914005	1.33068	1.14269	1.00726	1.17268	1.1327	1.07639	1.28832	0.97272
767	chr2	210327105	210935925	1.03633	1.08565	1.23289	0.707262	0.878581	1.02943	0.89562	1.11607	0.765216	0.691052	1.28685	1.10962	1.03872	0.985687	1.27968	0.893828	1.23408	1.19208	0.807092	0.839494	1.0801	1.28166	0.921738	1.063	1.00643	1.14468	1.00464	1.28725	1.161	1.13739	0.806086	0.869381	1.02053	1.07366	1.22557	0.939976	0.494966	0.779324	1.45764	0.876996	1.50789	1.32764	1.04623	1.0659	1.0865	0.859702
768	chr2	210935926	211557616	0.982562	1.28186	1.28222	1.01551	0.720259	1.08991	0.866484	0.982642	0.953262	0.694783	1.18212	1.19863	0.903489	1.0976	0.640435	1.02748	1.33606	1.03145	1.29114	1.15188	0.836382	0.839812	0.755092	1.36453	1.46277	0.968557	0.803945	0.935074	1.08072	1.30416	0.829499	1.22389	0.585358	1.16864	1.23139	0.968277	0.76013	0.911084	1.168	1.17167	1.54368	1.2655	1.27423	0.945662	1.19021	0.903556
769	chr2	211557617	212201685	1.09295	1.3404	1.11989	0.742669	0.937678	1.20178	1.02271	0.862572	1.22731	0.838168	1.52592	0.868793	1.18332	1.08721	0.626278	0.830085	1.46261	1.07088	1.33926	1.19429	0.885239	1.04043	1.07958	1.48527	1.20651	1.26115	0.980039	1.07006	0.975227	1.51973	1.13032	0.947899	1.18698	1.19742	1.30499	0.919317	0.941182	1.15422	1.48293	0.839442	1.20072	1.34637	1.14577	0.728171	1.06044	1.03786
770	chr2	212201686	212847733	0.962945	0.96656	0.910317	1.18482	0.92878	1.05195	0.805871	0.687532	0.892538	0.886514	1.2342	1.0651	1.25748	0.89844	0.772569	1.01697	1.21102	0.972393	0.82468	1.19367	1.02721	1.04927	1.22236	0.93309	1.02921	1.21886	1.02999	0.896273	0.928867	1.22495	0.851298	0.914757	1.11624	1.05692	0.887878	0.880184	0.619215	0.869291	1.33582	0.946245	1.65669	1.09951	1.07861	0.529785	0.942229	0.892362
771	chr2	212847734	213494318	1.10197	1.1941	1.08386	1.05669	0.891032	1.35456	0.877729	1.06364	0.736321	0.896086	1.17851	0.66942	1.11546	0.994775	0.601926	0.846334	1.0222	0.840744	1.0022	1.15536	0.880646	0.704732	1.09043	1.21813	0.9169	1.33203	1.19339	1.2616	0.898816	0.96529	0.884061	0.858731	0.826594	1.08864	1.05867	0.972719	0.708778	0.863012	1.16285	0.920015	1.52247	1.1418	1.12028	1.32854	0.803493	0.629023
772	chr2	213494319	214086631	1.07293	1.17003	0.868578	1.12685	1.08761	1.08348	0.901737	1.09064	1.29122	0.810108	1.45236	1.05747	1.20365	1.02909	0.629592	0.945989	1.27209	0.958764	1.09879	0.993047	0.943481	0.559733	0.812105	1.05617	1.07478	1.22479	0.922595	0.855445	1.0007	0.859057	0.873386	0.976961	0.927923	0.987831	1.02917	0.80863	1.35643	1.04804	1.25375	1.19412	2.01333	1.06863	0.906494	0.785328	0.945283	1.05388
773	chr2	214086632	214727215	1.07371	1.13208	0.892849	1.17937	0.893139	1.02407	0.826399	1.17773	0.795584	0.87569	1.12563	1.0122	0.7042	1.15827	0.602193	0.988369	0.88237	1.09603	1.13315	1.01208	0.989965	0.512015	1.08404	1.31024	1.04415	1.09837	0.851658	0.942036	0.733926	0.968533	0.782256	1.06336	0.763249	1.07351	0.912784	0.960655	0.778243	0.59883	1.37378	1.06088	1.27348	1.06895	1.06296	0.833527	1.2018	1.24237
774	chr2	214727216	215339671	1.08129	1.02475	1.21418	0.930042	1.09069	1.51163	0.725948	0.973649	0.858431	0.876682	1.07788	0.916031	0.901282	1.03565	0.652389	0.880887	0.97182	1.17313	0.883536	0.963534	1.04676	0.709011	0.83373	1.06778	1.07916	1.39095	1.00518	1.05232	0.935788	0.782014	0.880272	0.838412	0.903329	1.08906	0.994094	1.09989	0.477504	0.817386	1.34017	0.963363	0.945833	1.12428	0.76318	0.929797	1.05317	1.272
775	chr2	215339672	215951543	1.12147	1.1101	1.0481	1.18399	0.790135	0.769711	1.0581	1.02062	0.959986	0.89931	1.6266	0.964395	1.26116	1.15349	0.700948	0.984774	0.691885	1.08264	1.313	1.18867	0.896628	1.25271	1.13465	1.52383	0.964836	1.16763	0.87064	1.13748	1.04516	1.1204	0.751984	0.985116	0.906916	0.987559	1.12346	0.845444	0.996058	0.830483	1.07194	1.01383	0.989409	1.15594	1.03399	0.939583	1.03255	1.12135
776	chr2	215951544	216518299	1.02327	1.2843	0.969158	1.03893	1.0336	1.03448	0.835549	0.86403	1.23889	0.831584	1.25237	1.07345	0.933061	1.00377	0.504309	0.899578	0.637077	0.93679	0.749323	0.782568	0.886481	0.821554	0.878205	0.986846	1.05872	1.20984	0.993233	0.704077	0.795594	0.907967	0.986357	0.797001	0.762503	0.952421	0.970962	1.00424	1.06956	0.877733	1.41355	1.01712	1.15548	1.08453	0.720134	1.11916	1.34108	1.19941
777	chr2	216518300	217059858	1.22549	1.39571	0.741861	0.939939	0.997601	1.53553	0.741422	0.604586	1.17521	1.04064	1.50958	1.10821	1.06065	0.927255	0.490937	0.910385	0.671629	1.00785	1.22769	1.09343	1.01241	0.998996	0.995978	1.24178	1.01153	1.22371	0.769578	0.819826	1.06212	0.818072	0.951894	0.847466	0.628271	1.04304	0.944196	1.00789	0.931534	0.850771	1.30483	1.01625	1.53192	1.05379	0.860587	1.00745	0.980629	1.23528
778	chr2	217059859	217563699	0.944243	0.758003	1.02087	1.14561	1.09616	1.08177	0.985429	1.00814	0.951931	0.902495	1.13772	1.07225	1.07548	0.635787	0.341497	1.03329	0.766341	0.927343	0.781763	1.0781	1.01789	0.926497	1.03924	1.12645	0.930343	1.01042	0.907491	1.17232	0.836022	0.818164	0.920636	0.767896	0.911408	1.24584	0.824209	0.826757	0.432302	0.79092	1.22308	1.12274	1.08235	1.18232	1.23736	1.01646	1.17458	1.19522
779	chr2	217563700	218084158	1.08614	1.16028	0.922514	1.12047	1.04636	1.19845	0.92518	0.953839	0.855465	0.916696	1.3512	0.956568	0.834645	1.17829	0.592749	0.95163	0.637738	1.00049	1.06527	1.17975	0.868895	1.0234	0.97367	1.12619	1.05207	0.942551	1.1196	0.985544	0.974137	1.09591	1.10002	1.02067	0.917382	1.02868	0.928586	0.965357	0.418718	0.766396	1.29435	0.688562	1.47178	0.930754	1.2671	0.984492	1.01285	1.36145
780	chr2	218084159	218587933	0.99122	0.790097	0.903151	0.953161	1.00762	0.904346	0.857045	0.703791	1.17389	0.959539	1.05077	0.896524	1.10679	0.699971	0.507304	0.971388	0.675844	1.06653	0.839978	1.24161	1.01427	1.28584	0.767837	1.12279	0.858803	0.982621	0.948476	0.851865	1.32926	1.09757	0.906263	0.913393	0.796503	0.9681	1.05324	0.804636	0.476707	0.824655	1.37909	1.23377	1.22347	0.857667	0.904981	1.45545	1.25344	1.09623
781	chr2	218587934	219104607	0.919405	0.863561	0.850351	0.665011	1.09523	1.06925	0.869737	0.793371	0.888024	0.965851	1.15703	0.833829	1.00171	1.03681	0.405455	1.011	0.667272	0.942631	0.924272	0.962577	0.797376	0.958774	1.03158	1.10066	1.1533	0.817557	1.18391	0.949683	1.01547	1.18328	0.931725	1.18362	1.35419	1.09486	1.08862	0.951739	0.235225	0.877649	1.04584	1.1002	1.24806	1.12089	1.09108	0.941858	1.15045	1.25261
782	chr2	219104608	219675654	1.12358	1.17814	0.815506	0.976914	0.908689	1.11757	0.817539	0.993022	0.984167	1.0818	1.23922	0.87266	0.855526	0.844971	0.743987	0.817951	0.909149	1.20694	1.35304	1.03248	0.919665	0.995247	1.12902	0.984327	1.08643	0.7445	1.08706	0.771892	0.885506	1.09731	0.98714	1.08873	1.22944	1.13891	0.977625	0.961224	0.428906	0.98789	1.13823	0.916358	1.66448	1.36809	0.749323	0.577963	0.77078	1.16284
783	chr2	219675655	220216779	1.10666	0.879664	0.76211	0.796435	0.98404	0.896814	0.909764	1.15126	0.988656	1.16845	1.06413	0.915062	0.986017	1.04898	0.91736	0.862504	0.993634	1.03367	0.924364	0.795837	0.631031	1.12128	1.18092	1.4166	0.98151	0.700801	0.957368	1.15055	0.84962	1.05031	0.8366	0.847127	0.702832	1.09289	0.925995	0.857466	0.269438	0.750752	0.90948	0.952218	1.81718	1.13114	1.16152	1.09465	0.885075	1.02605
784	chr2	220216780	220747118	1.09469	1.03353	0.973021	0.722609	0.894594	1.26722	0.864878	0.721538	0.96753	0.750816	0.903747	1.02235	0.947584	0.711302	0.662505	0.829791	0.723397	0.987197	1.005	1.12279	0.593052	1.24006	0.807536	1.01717	1.07636	1.05151	0.969616	1.12532	0.834555	0.871445	0.860739	0.935225	1.00128	1.06045	1.32076	0.742724	0.704014	0.837398	1.05344	1.16542	1.90286	1.46253	1.24174	1.16894	0.69567	0.937078
785	chr2	220747119	221294784	0.970318	1.20185	0.878818	1.06277	1.15478	1.13673	0.934162	0.66684	0.869814	0.639252	1.3082	0.706742	1.14792	1.09906	0.818428	0.931643	0.636157	1.04815	1.24653	0.858883	0.72032	1.39857	1.0439	1.14912	0.933793	1.27777	1.27089	1.0238	0.862777	1.00523	1.03862	0.992552	0.991937	1.12418	1.13041	0.932346	0.304923	0.754632	1.40269	1.19221	1.74222	1.50862	1.1394	1.05496	0.874885	0.806047
786	chr2	221294785	221885611	1.3355	0.886453	0.971801	0.805642	1.13571	1.06185	1.01472	0.857087	1.15387	0.743	1.41644	0.910651	1.19198	0.935423	0.537508	0.952632	0.896047	1.04171	1.0177	1.28262	0.711201	1.5938	1.09407	1.02075	1.42637	0.894382	0.910249	0.528975	0.872169	0.93192	1.01704	0.815779	1.01501	1.00718	0.820346	0.909915	0.569805	1.00353	1.31122	1.14253	1.15806	1.60525	0.707813	1.28809	1.22898	0.961848
787	chr2	221885612	222461365	1.21958	1.10555	0.976514	0.834979	1.27477	1.45965	0.727161	0.916006	0.915547	0.812341	1.17112	1.1817	1.06215	1.09237	0.500522	0.925494	1.79029	1.18088	0.954799	1.13743	0.780988	1.09722	1.39889	1.56115	1.37037	1.12198	0.979269	0.93043	1.17645	1.13909	0.905891	1.1564	0.922842	1.13054	1.09081	0.8939	0.5258	1.04485	1.47911	0.996217	2.07034	1.62624	0.821654	1.21594	0.925468	0.980572
788	chr2	222461366	223056810	1.17355	1.19184	1.25003	1.28085	0.94744	1.65189	0.958823	1.24726	0.881761	0.76683	1.24247	1.37256	1.24928	0.964457	0.514293	0.962071	1.02504	0.875535	1.08725	0.800476	0.655369	1.44849	1.22953	1.4659	1.03094	1.70615	0.962502	0.817418	1.11967	0.94216	0.816382	1.04538	0.945603	1.0271	0.834691	0.984471	0.821644	1.01346	1.1657	1.30314	1.62838	1.72927	0.993994	1.47479	1.01531	1.05726
789	chr2	223056811	223645923	1.11808	1.12439	0.853511	1.3998	0.830936	1.20134	0.838422	1.23307	0.879317	0.917128	1.3774	0.942593	1.09671	0.913846	0.659511	0.792296	0.851921	0.922268	1.01618	0.924262	0.702794	0.872781	0.79198	1.53207	0.768158	1.16314	0.89077	0.76304	1.0259	1.16766	0.999428	1.0776	0.559106	1.19169	1.10019	0.95014	0.512242	0.80539	1.46031	1.42054	1.23896	1.51807	1.06967	1.5514	1.29829	1.00339
790	chr2	223645924	224244990	1.23373	1.28353	0.897481	0.837986	1.15252	1.34369	0.699492	1.09167	0.773399	0.701643	1.3374	1.30087	0.929955	1.2971	0.748741	1.07014	0.678034	0.874131	1.1151	1.20845	0.59382	0.957326	0.864035	1.4161	1.09728	1.56267	1.23747	1.08477	0.936396	1.00521	1.02073	1.22863	1.08072	1.0757	0.956235	0.992097	0.695506	0.792637	1.21827	1.27932	1.25901	1.2499	0.925142	1.08929	0.838766	0.838202
791	chr2	224244991	224837838	1.38032	1.28073	0.997218	0.926821	1.24619	1.1672	0.894655	1.00753	0.775994	0.687289	1.15141	1.06918	1.31944	1.14582	0.606939	0.916019	0.666755	0.897716	1.18978	1.01077	0.690131	1.01954	1.20788	1.30132	1.21223	1.20628	0.719633	0.944742	0.898549	1.15126	0.893831	0.934107	0.599588	1.11803	1.1207	0.981467	0.721222	0.907687	1.27521	1.13755	1.84102	1.50871	0.76372	1.27187	1.46919	1.17043
792	chr2	224837839	225390734	1.0194	1.08341	0.948008	0.554699	1.04563	1.1354	0.795221	0.901831	0.909187	0.673746	1.13623	0.886571	1.11528	0.830038	0.778519	0.791086	0.743145	0.792909	1.16092	0.978848	0.632724	1.05458	1.18591	1.32104	0.840942	1.24394	0.768866	0.962136	0.745316	1.16894	0.955092	0.957887	0.918234	1.14534	0.844287	0.792385	0.647586	0.883211	1.42367	1.00758	1.53901	1.32682	0.959806	1.08453	0.947558	0.612672
793	chr2	225390735	225979313	1.0639	1.17971	1.03415	0.884102	1.01435	1.07085	0.817676	1.11504	0.878326	0.840641	1.17198	0.767376	1.35479	0.692871	0.612963	0.919071	0.606252	0.76807	1.26459	1.09424	0.650216	1.10844	1.638	1.4886	0.840231	1.17984	0.978288	1.07964	0.961963	1.20466	0.801386	0.986095	0.830706	1.05393	1.06071	0.969572	0.57647	0.945666	1.3776	0.947016	1.25187	1.39516	0.928003	0.877389	1.02127	1.0913
794	chr2	225979314	226574258	0.949069	1.16977	0.875842	0.940983	0.964943	1.14917	0.840484	0.629919	1.10189	0.783478	1.25768	0.821052	0.844104	0.819636	0.517949	0.780083	0.838827	1.20406	0.999012	0.998779	0.581434	0.908304	1.54361	1.13064	0.936864	0.900603	0.569692	1.10205	0.926476	0.988672	0.835493	0.681289	0.969211	1.03904	0.971592	0.80151	0.648485	0.963319	1.34562	1.02933	1.22594	1.38708	0.998859	1.01656	0.694607	0.967778
795	chr2	226574259	227179963	1.15813	1.1003	0.879988	0.983425	0.957324	1.15011	1.02396	0.8873	1.06864	0.95004	1.00285	1.04524	1.06253	0.738207	0.673058	0.900899	0.974076	1.06869	0.956665	1.00989	0.736037	0.786601	1.05291	1.18489	0.928144	1.25785	0.909443	0.97739	0.816644	1.25187	0.989401	0.863333	0.832433	0.971904	1.11382	0.807922	0.761211	0.913754	1.0605	1.07454	1.12505	1.25566	1.08698	1.0475	1.04725	0.992886
796	chr2	227179964	227734047	1.14236	1.05127	0.82909	0.742077	0.629321	1.44897	0.866174	1.13837	0.865406	1.06936	1.41186	1.16669	0.836464	1.01645	0.613609	0.824919	0.917242	0.973454	1.10402	0.92179	0.633235	1.04052	1.63717	1.44716	1.05884	1.20989	0.845803	1.17982	0.806075	0.919213	0.960944	0.996244	1.05078	1.06766	0.959837	0.948169	0.629348	0.853426	1.20536	0.876585	1.24293	1.21828	1.10379	1.27424	0.769217	1.10181
797	chr2	227734048	228284248	1.08014	1.18712	0.918896	0.815073	0.990978	1.28939	0.878708	0.651186	1.24727	1.01113	1.33212	0.975527	1.16454	0.712698	0.75791	0.965445	0.683533	0.946949	1.22269	1.00998	0.657761	1.05448	1.53974	1.1478	1.01058	1.05085	1.07479	0.940293	0.888841	1.20833	0.992052	0.889786	1.15576	1.09946	1.29743	0.954809	1.3167	0.809445	1.11054	0.907502	1.19688	1.28622	1.14512	0.83737	0.770716	1.04315
798	chr2	228284249	228888784	0.973361	1.00137	0.9438	1.17438	0.732262	1.48469	0.741863	0.877885	0.896567	1.12633	1.00329	1.06299	1.1424	0.826187	0.616465	0.93467	0.882866	1.02495	0.965401	1.02209	0.502696	0.925246	1.18825	1.41512	0.890946	0.794046	0.837986	0.902733	0.976777	0.933636	1.11537	0.772807	0.8789	1.10833	0.988802	0.866439	1.15624	0.652699	0.837829	0.909015	1.72424	1.31759	0.935441	0.912083	1.22567	0.889074
799	chr2	228888785	229517674	0.949758	1.16122	1.09711	0.776132	1.3204	1.41091	0.824291	0.607725	0.782308	1.10682	1.1463	0.854803	0.970399	0.902425	0.929613	0.8785	0.51477	0.885501	1.0088	1.10027	0.697573	0.96955	1.835	1.6362	0.970668	0.964869	0.797115	1.05593	0.707095	0.904893	0.78482	0.849676	0.856558	0.93135	1.01175	0.943643	1.14003	0.845394	1.12292	1.05485	1.22548	1.49035	1.0234	1.01134	0.79178	0.854564
800	chr2	229517675	230092662	0.972743	1.00076	1.04149	0.978416	0.948642	1.0834	0.824633	0.901887	0.950902	0.985383	0.990252	0.940958	1.0585	0.966381	0.797595	0.796825	0.420629	1.02355	1.09881	0.98963	0.63536	1.14055	1.04609	1.23148	0.838769	0.967182	1.04278	0.958476	1.04493	1.40115	0.903433	1.01534	0.894976	0.953971	0.965209	0.841869	1.59518	0.960774	1.37135	1.01597	1.25834	1.33669	1.01203	0.928916	0.779716	0.909541
801	chr2	230092663	230641378	1.09831	1.12343	1.15261	1.28223	1.11025	1.10288	0.713145	0.946914	1.11846	0.991224	1.39342	1.05458	1.12137	1.0071	0.684466	0.969163	0.477715	0.78813	0.841416	0.792703	0.65776	1.21578	1.40801	1.68642	0.908886	1.03576	0.970528	1.09386	0.831765	1.14887	0.932274	0.921804	0.879704	1.07793	0.832537	1.08649	1.30469	0.648886	1.16207	1.03237	1.09163	1.1411	1.05791	0.664064	0.868879	0.730587
802	chr2	230641379	231237245	1.10016	0.835869	0.972913	1.17433	1.23948	1.32342	0.766447	0.91474	0.843225	0.97075	1.07619	1.04347	0.998713	0.929985	0.690719	0.95037	0.882497	1.13961	1.11107	0.91197	0.612927	1.17179	1.36841	1.34343	0.898188	1.02721	1.06585	1.27913	1.11052	0.942256	1.00407	1.01958	1.17023	1.13757	0.890563	0.938983	1.09641	0.875429	1.28418	0.886743	0.475104	1.13399	1.39412	0.539664	1.17379	1.09383
803	chr2	231237246	231801013	1.06646	1.07474	0.814695	0.995959	0.780094	1.3921	0.861225	0.776766	0.653967	0.870559	1.33925	1.00174	1.11042	0.78759	0.526578	0.870023	0.466211	0.824546	0.831899	1.04595	0.680943	1.0359	1.00891	1.26889	1.10708	0.889409	1.28214	1.08373	0.924253	0.965615	1.0706	0.864963	1.05646	1.1914	1.20783	0.911727	1.22664	0.838323	1.24936	0.868231	1.50686	1.15671	1.04384	0.65587	1.38154	1.11028
804	chr2	231801014	232338955	1.13035	0.846444	0.978487	0.950428	0.874646	1.54134	0.756876	1.02399	0.720404	1.00438	1.17066	0.93777	0.725089	0.761987	0.468838	0.945744	0.595246	0.731877	1.14585	0.981523	0.744508	0.839863	1.09579	1.17596	0.924534	0.874356	1.11502	0.870326	0.792433	0.816334	0.889773	0.886421	0.996283	1.13213	0.794764	0.767951	0.703008	0.953582	0.958762	0.840837	0.276666	0.982438	1.20031	0.631356	0.868157	0.776701
805	chr2	232338956	232932775	1.03111	1.14078	0.839272	1.11679	0.898826	1.36378	0.803516	1.29803	1.00465	1.07826	1.26139	1.32352	1.17263	0.819102	0.523145	0.865845	0.838472	0.981619	0.982017	0.975209	0.762475	1.05847	1.30479	0.79732	1.55186	0.792941	1.07746	1.02998	0.949249	0.833292	0.770285	0.93035	1.26124	1.00795	0.99412	0.9862	1.44328	0.840245	1.64553	1.02654	0.552739	1.28796	0.736504	1.04264	0.998683	0.717609
806	chr2	232932776	233477646	1.00076	0.885441	0.777334	1.28479	0.845704	1.4509	0.813096	0.979008	1.11117	1.20991	0.984905	0.913047	0.822365	0.620098	0.552598	0.873325	0.769745	0.931624	1.27633	0.772051	0.660456	1.03011	1.06863	1.1178	0.91943	0.983441	0.930632	0.991687	0.9173	0.897086	0.84348	1.00435	0.908113	0.89351	0.746054	0.85511	1.06801	0.644105	1.12875	0.972149	0.882579	1.08424	1.09614	1.06782	1.18409	0.878579
807	chr2	233477647	234100936	0.96008	1.07944	1.04104	1.24387	0.852522	1.32337	0.856597	1.01684	1.0865	1.07141	1.08181	1.29781	0.959103	0.904219	0.771528	0.915898	0.875964	0.81966	0.989416	0.898142	0.71695	1.23313	0.955271	0.898635	0.902076	1.6821	0.977742	0.822338	1.01489	0.772274	0.778738	1.26432	1.30155	1.11221	1.12668	1.03812	1.02239	0.708803	1.11476	0.889889	1.07014	1.14326	0.992215	0.920625	1.13388	0.677516
808	chr2	234100937	234655752	1.13516	1.0756	0.957129	0.85089	1.29183	1.0165	0.96895	1.14356	0.591959	1.10676	1.1747	0.768702	0.801585	0.74725	0.896859	0.9005	1.2311	0.816317	0.989383	0.60404	0.720635	1.22591	1.03287	1.06001	0.871178	1.61269	1.13466	0.994201	0.773835	0.901418	0.808399	0.976119	0.840117	1.09115	0.956877	0.885443	0.875197	0.936852	1.09623	1.00186	0.883157	0.981168	0.836898	1.03681	0.924328	0.976909
809	chr2	234655753	235196495	1.02424	1.26119	1.03918	1.51937	1.02974	1.0139	1.01177	0.931978	0.915546	1.32597	1.1519	1.12322	1.06041	1.08324	0.990423	0.868808	1.23085	0.969282	0.512726	0.778416	0.781968	1.38722	0.818605	1.15788	1.30668	0.954284	0.994316	1.11467	0.808094	0.967641	0.864248	1.23637	0.979763	1.00992	1.21778	0.733116	0.933092	0.633833	1.40018	1.02278	0.766094	0.995229	1.39148	1.89438	1.01134	1.11599
810	chr2	235196496	235733012	1.11669	1.01908	0.963836	0.821073	0.86443	0.924626	1.08578	1.05812	0.898052	1.24958	1.29553	1.12124	1.1268	1.14367	0.98252	0.843914	1.17959	0.763499	0.936097	0.847872	0.758819	1.07516	0.819167	1.00951	1.32867	1.10418	1.02961	1.00658	0.878039	0.925781	1.01424	0.988671	0.739134	1.08743	1.10556	0.92417	1.23673	0.913044	1.06471	0.963882	1.28041	0.972386	0.85713	0.932252	0.90824	1.08013
811	chr2	235733013	236251506	1.0439	1.12892	0.818374	0.965116	0.802867	1.18279	1.19563	0.973468	0.8441	1.10353	1.33351	1.01099	1.24625	1.00796	0.960033	1.01915	1.09582	0.870876	0.894312	0.980804	0.762537	0.898623	0.917011	0.985243	1.17479	0.876503	0.810176	0.872385	0.6384	0.880185	1.04884	1.24705	1.1717	1.1066	0.784463	0.927609	1.11537	0.654326	1.05221	1.13554	1.85343	1.08672	1.00649	1.02123	0.82439	0.833278
812	chr2	236251507	236771372	1.29285	1.35094	0.986413	1.35147	1.10648	1.33252	0.907703	0.857132	0.695395	0.753464	1.1048	1.22138	0.941563	1.24912	0.987357	1.07619	0.675644	0.904365	1.37249	1.05366	0.865256	1.31769	0.642671	0.97325	0.881594	1.05978	0.921853	1.41451	0.845046	0.951638	0.997258	0.936569	1.06891	1.11184	1.14223	0.873334	0.868019	0.829413	1.05316	1.27222	0.65568	1.17209	1.10285	1.45491	0.999358	0.792384
813	chr2	236771373	237286131	1.00189	1.16493	1.08968	0.839845	0.775607	1.04741	1.03174	0.988234	1.04698	0.765995	1.03379	0.997451	0.909802	0.923823	1.12399	1.02595	0.552082	1.01445	0.995667	1.02817	0.95195	1.11755	0.885101	0.868993	0.929757	0.901154	0.762224	0.992143	0.808263	0.944274	1.06415	1.11603	1.0126	1.19508	1.04833	1.0105	0.554426	0.911896	1.00735	0.97092	0.831256	1.11041	1.23564	1.4404	0.919033	0.588435
814	chr2	237286132	237813589	0.950028	1.05808	1.0442	0.891088	0.834933	1.39782	1.10795	0.752096	1.03272	1.00119	1.02924	0.857807	1.07636	1.06585	0.832097	0.987218	0.997121	0.833986	1.03901	1.21172	0.773787	1.05786	1.38573	1.06395	0.86086	1.33085	0.963521	1.17156	0.833319	0.78991	0.946445	0.872598	0.820804	1.01198	1.12075	0.881593	0.702584	0.776391	0.906881	0.93696	1.12879	1.20472	1.40462	0.772457	0.859233	0.877707
815	chr2	237813590	238314369	1.04891	0.98177	1.00239	1.10724	0.907433	1.11424	1.05978	0.573486	0.839809	0.985719	0.911396	0.756032	0.935896	0.940843	0.699247	0.885678	0.829349	0.714135	0.932526	1.04725	0.761434	1.00415	1.00406	0.947702	1.0898	1.01947	0.863862	1.08494	1.0104	1.2532	0.900406	0.986994	0.911356	1.09196	0.987202	0.766801	1.03507	0.695951	0.987567	0.959134	1.05219	0.94897	0.940435	1.4511	0.701693	0.862927
816	chr2	238314370	238823385	0.788941	1.13683	0.916462	1.00891	0.705586	0.955485	0.897799	0.892472	0.688434	1.24676	0.961257	1.17203	0.849564	0.924396	1.05836	0.960935	1.25423	0.750023	0.757864	0.890802	0.777977	0.999463	1.11454	0.977035	1.06665	1.1543	0.807231	0.84846	0.873211	0.983622	0.706626	0.985903	0.707955	1.11467	1.16336	0.743017	1.3536	0.840815	1.42438	0.979372	1.82695	1.08371	0.873283	1.24135	0.882147	1.09878
817	chr2	238823386	239387602	1.24765	0.760879	0.822922	0.865224	1.08289	1.34092	0.887429	0.852911	0.796703	1.17009	0.528902	1.11689	0.968245	1.04652	0.72373	0.970746	0.744986	1.08672	1.14633	0.808665	0.59009	0.878562	0.905882	0.929012	0.941137	0.709512	0.789779	0.92958	0.63978	1.09264	0.842731	1.03457	0.951187	1.12989	0.806004	1.05676	0.670047	0.950425	0.945204	0.850114	0.961889	0.88256	1.23854	0.746838	0.815161	1.24955
818	chr2	239387603	239938038	1.076	0.892604	0.944672	0.977814	0.840184	1.16299	0.83407	0.464547	0.566762	0.945292	0.84939	1.12582	0.835356	0.996526	0.75351	0.970569	0.811113	0.952873	1.22624	0.975381	0.646137	0.579087	1.40545	1.06595	1.02573	0.909509	0.86494	0.873947	0.949862	1.03774	0.950378	1.33288	1.02542	1.04218	0.89211	0.906626	1.15679	0.854692	1.25061	0.99023	1.60825	0.801214	0.905795	0.745329	0.892699	0.718066
819	chr2	239938039	240435760	1.03773	0.910988	0.936006	0.879955	0.961997	1.20255	0.911958	0.879582	0.282909	1.1401	0.746913	0.883497	0.80022	1.09239	0.391852	0.921514	1.1555	0.724005	0.82069	1.15244	0.624118	0.91167	0.624277	0.792467	0.672632	0.800346	0.953792	1.08615	0.809249	0.725102	0.86934	0.991775	0.957664	1.15337	0.869309	0.840305	0.537944	0.574022	1.07222	0.779685	0.930201	0.998899	0.722589	0.817234	0.646127	0.966719
820	chr2	240435761	240977634	1.1207	0.831715	1.17086	0.84458	0.980422	1.12744	1.13049	0.918122	0.921324	1.11628	0.840093	0.93511	1.01194	1.07479	0.491269	0.996824	0.792582	0.791947	0.964346	1.11536	0.644794	0.7355	1.26199	0.829922	1.16481	1.26213	1.18501	1.3867	0.990516	1.07944	0.856882	0.863785	1.21255	1.19234	1.14096	1.00794	1.19025	0.868387	1.03052	1.26461	1.71446	1.07711	1.06081	1.35292	1.41038	0.538527
821	chr2	240977635	241524375	0.904138	1.2324	1.02103	1.24441	0.989534	1.37949	1.01472	0.881684	0.520386	1.02519	0.686395	0.95246	0.782397	1.10787	0.741909	0.903652	0.855063	0.538646	1.07546	1.13363	0.669203	1.46221	0.962238	1.00549	0.986062	0.857983	0.93932	0.969866	0.707922	0.654722	0.915424	0.917058	1.24477	1.12126	1.02284	1.002	1.38541	0.855963	1.15355	1.00044	0.766654	0.957908	0.889504	1.42275	0.846742	0.967484
822	chr2	241524376	242067515	1.342	0.882842	1.08205	0.638666	1.10611	1.433	1.04893	0.480239	0.550272	1.37482	0.93979	1.19571	1.16109	0.896218	0.650464	0.956451	0.985486	0.930097	0.654776	0.825357	0.720652	0.573247	0.903786	0.972699	0.792544	0.909018	0.862851	1.23276	1.14251	0.69956	0.822716	1.01608	0.808598	1.02625	1.07281	0.741104	1.4808	0.646359	1.18971	1.43864	0.697182	1.2165	1.35542	1.25028	1.17324	0.932349
823	chr2	242067516	242612476	1.18243	0.994967	1.10681	0.89688	0.993173	1.56597	0.871286	0.78011	0.607396	1.05421	0.731865	1.13915	1.17225	1.16067	1.00348	0.968162	0.925605	0.82106	0.743675	1.06513	0.640104	0.806592	0.748371	0.924579	1.14634	0.858696	0.925888	0.918891	1.10121	1.02705	0.88831	0.861145	0.801346	1.06509	0.910823	0.96374	1.2077	0.649703	1.2928	0.874124	1.32513	0.905892	0.828712	0.968221	0.951361	0.954945
824	chr2	242612477	243199373	0.934456	0.773671	0.879207	1.03621	1.07103	1.40071	1.01028	0.700191	0.686626	0.882893	0.800538	1.00561	1.00496	1.14739	0.619944	0.783674	0.921104	0.835881	0.838046	0.970837	0.680583	0.774387	1.03056	0.687509	1.01162	0.918612	0.985788	1.2266	1.09176	0.955769	0.99239	0.987916	0.839519	0.958175	0.837283	0.976607	1.129	0.776949	1.17659	1.00448	1.60744	1.28953	0.700066	1.38199	0.941761	1.12765
825	chr3	1	664580	1.04555	1.21634	1.73295	0.771766	1.10093	0.825208	1.03675	0.774016	0.964511	1.08445	1.25557	1.09909	1.04712	1.34075	1.11311	1.10932	1.10711	1.12796	0.668549	1.02986	1.31014	0.826879	0.954261	1.16065	0.960339	1.65253	1.11045	1.19253	1.02824	0.974993	1.10991	0.867267	0.838852	1.11032	1.23036	0.844833	1.24732	1.12456	0.988463	1.04456	0.722168	1.55357	0.9326	0.823612	0.778212	1.13446
826	chr3	664581	1304247	0.890495	1.41159	1.8742	1.33169	1.40905	0.708661	0.925443	0.880343	1.19062	1.10667	1.43397	0.843389	1.0447	0.953937	0.942204	1.02089	1.13163	1.07523	0.713581	1.07636	1.30332	0.43552	1.03859	1.33299	1.12307	1.34297	1.0644	1.13873	1.25357	1.08377	1.4045	1.11573	0.903651	1.06868	1.32458	1.11659	1.19375	1.03346	1.48209	1.19835	0.459816	1.33789	1.0377	0.845441	0.631657	0.809703
827	chr3	1304248	1944856	1.11562	1.20268	1.77329	1.16777	1.05863	0.7313	1.08108	0.876679	1.16868	1.16449	1.19525	1.33073	1.2616	1.43527	1.08068	0.978472	0.950643	0.896585	0.530551	0.93602	1.22832	0.782528	0.773312	0.981229	1.09841	1.02117	1.01201	1.11758	1.03866	0.999379	1.25173	0.888769	0.957629	0.998199	1.04848	0.934584	1.52689	0.932071	1.05765	1.01058	1.12365	1.22979	1.01308	0.933851	1.0553	1.13298
828	chr3	1944857	2583251	1.1218	1.3238	1.52327	1.0673	0.959684	0.919144	0.991176	0.928061	0.938866	1.12505	1.11828	0.759739	1.33729	1.03113	1.19092	0.902237	1.11451	0.945265	0.916141	1.01499	1.09997	0.626231	0.984016	1.27522	0.797099	1.42757	1.04441	0.878364	0.946388	0.975505	1.38669	1.1297	1.02122	1.01975	1.05959	0.92266	1.27199	1.03589	1.39371	1.01788	1.3332	1.54319	1.13746	1.25481	0.815516	1.24702
829	chr3	2583252	3163485	1.05526	1.21196	1.9708	1.00153	0.891908	0.838864	0.977994	1.08435	1.11871	1.23072	1.27971	1.03828	0.963819	1.10029	1.25457	0.978964	0.970154	0.910016	0.916712	1.08421	1.21754	1.16371	0.884134	1.13785	0.69892	1.13478	0.997702	1.10742	1.238	0.865283	1.43022	1.00486	1.253	1.16114	1.10523	0.997665	1.03775	1.01544	1.54458	1.16652	0.240096	1.42545	1.20036	1.74047	0.981593	1.28121
830	chr3	3163486	3744260	1.04734	1.16381	2.05895	0.705851	0.986793	1.0902	1.20386	1.08998	1.40466	1.29044	1.19568	0.935451	1.09393	1.11883	1.07004	0.93042	0.994486	0.794778	0.721111	0.927316	1.49734	0.886924	0.920288	1.35991	0.914033	1.12125	1.08769	0.949539	1.16567	0.994265	1.33709	1.18365	0.884027	1.07275	1.40805	0.960304	1.08157	1.25968	1.39114	1.06531	0.717585	1.55059	1.08045	1.21704	0.889484	1.10214
831	chr3	3744261	4364846	0.923912	1.33316	1.71647	1.16615	1.06733	0.919573	0.829398	1.19781	1.51421	1.16117	1.41221	1.09678	0.981316	1.06652	1.32942	0.957612	0.567177	1.18238	0.709872	1.21734	1.38331	0.931087	1.35726	1.24999	1.0106	1.2262	1.04694	1.1182	1.10965	0.859062	1.38989	1.06741	0.94796	1.06752	0.816485	0.80716	1.22688	1.09413	1.24723	1.03464	0.514926	1.83986	1.10417	1.24348	1.00138	1.59274
832	chr3	4364847	4902871	1.00504	1.2364	1.68387	1.21732	1.02959	1.12124	1.25623	1.23548	0.761539	1.11294	1.11104	1.33314	1.16564	1.23117	1.06676	0.813004	0.661786	0.808723	0.943954	0.989101	1.13341	1.04146	1.06882	0.841038	0.819256	1.14624	1.07459	0.977553	1.07378	0.810781	1.19502	0.828813	1.18221	1.01767	0.972568	0.965579	1.10376	1.15341	1.31557	0.78361	1.04389	1.31537	1.61235	0.754654	1.01795	1.0344
833	chr3	4902872	5474860	0.986414	1.08783	1.29232	0.772675	1.1174	0.913992	0.993496	1.09661	0.976623	1.0083	1.3889	0.883716	0.919961	1.05274	1.20727	0.962219	0.731398	1.16688	0.649382	0.679976	1.25452	0.726882	0.935694	1.27508	0.910981	1.70349	0.839195	1.18118	1.40076	0.840863	1.37959	1.17642	1.36069	1.00884	0.997535	0.95886	0.530935	1.22613	1.49753	1.0588	1.91327	1.46839	1.08363	1.29489	0.6657	0.926152
834	chr3	5474861	6095681	1.18441	1.0679	1.62699	1.2365	1.07443	1.10078	0.946518	1.20978	0.957846	0.856336	1.36546	0.99583	1.40519	0.927654	1.34533	0.982545	0.696961	0.945706	0.807489	1.1753	1.0462	0.806161	1.4219	1.02368	0.860668	1.15938	0.976081	0.958849	1.30211	1.0087	1.37346	1.14149	0.845787	1.1449	0.96718	0.879496	0.912557	1.23856	1.4743	1.16092	1.32146	1.15528	1.2554	0.893525	1.17401	0.995008
835	chr3	6095682	6747718	0.844341	1.09765	1.52947	0.999164	0.96945	0.892621	1.1292	1.15473	0.689495	0.868852	1.20612	0.958762	1.08672	0.985466	1.12565	1.04013	0.41256	0.935704	0.8483	1.09699	1.01715	0.90752	1.08668	1.12706	1.03003	0.764855	1.00465	0.812687	1.04888	1.06365	1.33875	0.994979	1.00381	1.07999	1.1546	1.0841	1.05454	1.37281	1.15377	1.31305	1.72576	1.26839	1.02351	1.09372	0.949185	0.718941
836	chr3	6747719	7374319	0.939443	1.51351	1.66037	1.27843	1.12522	1.05815	1.15054	1.41854	1.1376	0.522215	1.45741	1.15343	1.28057	1.33865	1.3878	0.902306	0.798629	0.968521	0.918116	1.05043	1.20911	0.943372	1.59072	1.11708	0.89123	0.766164	1.18987	0.880056	0.874988	0.852962	1.43299	0.919304	1.20021	1.10047	1.03057	0.903879	0.748047	1.01856	1.57917	1.01384	1.34943	1.16587	0.841762	1.10504	0.973102	1.48098
837	chr3	7374320	7969009	0.957592	1.05143	1.49378	0.970759	1.20144	0.780504	1.12987	1.05476	1.53563	0.850895	1.4739	0.765488	1.01608	1.21057	0.979691	1.03527	0.255969	1.07172	0.859922	0.83345	1.26639	0.765192	1.23829	1.22847	0.952768	1.06014	1.36282	0.697821	0.989007	0.938826	1.33359	0.881376	0.943375	1.03834	1.11785	0.649416	1.43787	1.1597	1.21457	1.11538	0.81433	1.33797	0.968152	0.583518	0.965047	1.12366
838	chr3	7969010	8546789	0.960966	1.04706	1.91373	0.876888	1.22877	0.599643	1.15151	0.858585	1.10899	0.709297	1.1753	0.769536	1.30535	1.17618	0.887863	0.769957	0.576052	0.953558	0.758847	0.974057	1.23275	1.11559	0.724498	0.792535	1.09614	0.886039	1.34055	0.989018	0.862965	0.65787	1.27545	0.928565	0.995236	1.24378	0.953775	0.964631	1.20423	1.13154	1.32426	0.924483	0.644395	1.00694	0.898209	0.96272	0.91187	0.804474
839	chr3	8546790	9067456	0.932754	1.09804	2.15353	0.829845	1.06015	0.788677	1.10854	0.800284	1.00145	0.779009	1.07404	0.748442	1.09576	1.06031	1.28367	0.948614	0.56872	1.13916	0.947379	1.19297	1.13871	1.07868	0.774366	1.07385	1.1384	1.1658	1.09769	1.03716	1.07215	0.883258	1.05534	1.37601	0.998162	0.957807	0.831236	0.940437	1.03635	1.13461	0.923648	1.05851	0.507795	1.48229	1.01696	1.30928	0.649433	1.31068
840	chr3	9067457	9612225	0.898204	0.949134	1.75871	0.788753	1.07318	0.736212	1.18574	0.805256	1.4818	0.806411	1.06393	0.851527	0.911241	1.01092	1.09944	0.979178	1.1203	1.09319	0.72181	1.14838	1.10422	1.18808	1.43876	1.04112	0.991538	0.990722	0.786066	1.29713	1.03632	0.860155	1.01129	1.08108	0.919286	1.0083	0.917212	0.767853	1.06352	1.25255	1.7122	0.838107	0.495832	1.60218	0.952735	0.851379	1.04383	1.18888
841	chr3	9612226	10156806	0.999053	0.953519	1.75823	0.846001	0.916284	1.24596	1.07555	0.610688	0.760471	0.803388	1.20706	1.0798	0.745022	1.0905	1.10671	0.93075	0.811833	0.9371	1.15052	0.811921	1.0667	1.08161	1.27722	1.11891	1.15748	0.962897	0.953466	0.876242	0.721083	0.823335	1.02512	0.930587	1.15246	0.934518	0.855518	0.963173	1.29094	1.09431	1.23447	0.776021	0.483377	1.18525	1.18367	0.490761	0.909528	1.2278
842	chr3	10156807	10660631	1.06392	1.2178	1.95881	0.9694	1.54396	0.799458	1.25887	0.820093	1.25634	1.09541	1.09585	1.11924	1.32061	1.27477	0.912999	1.07529	0.761159	0.946906	0.703117	1.22655	0.852418	1.0645	1.19965	1.10754	0.933448	0.858201	1.01918	0.876346	0.962601	0.927499	1.10623	0.892851	1.33445	1.04881	0.812926	0.742353	0.778631	0.938415	1.24408	1.16661	0.780868	1.28212	0.870771	1.42817	1.28733	1.36639
843	chr3	10660632	11160883	1.02521	1.27664	1.86803	0.698931	1.13014	0.88877	1.27832	0.670477	1.09504	1.07909	1.07728	1.35863	0.940881	0.867089	1.23542	1.03978	0.962555	0.883989	1.02865	1.17068	0.957861	0.978316	1.68693	1.04861	0.857938	0.976753	0.865091	1.06706	1.22044	0.956287	1.06442	1.02509	1.16244	0.982973	0.912256	0.900314	0.533232	1.08326	1.27257	1.06617	0.872799	1.43106	1.15961	0.895167	1.12686	1.38186
844	chr3	11160884	11701272	1.16708	1.12099	1.74738	1.13824	1.03997	0.716942	1.0374	1.15136	1.3556	0.833627	1.19943	1.0901	1.08995	0.853469	1.47484	1.03655	1.12792	0.940909	1.04884	0.776478	0.98314	1.11084	1.3516	1.05074	1.03191	1.29152	0.889801	0.898869	1.19428	0.864473	1.05193	0.821193	0.850707	1.01313	1.05516	0.815664	0.949773	1.26163	1.18752	1.07569	0.404859	1.58889	1.0363	1.34368	0.908559	1.15245
845	chr3	11701273	12267874	0.81511	1.001	1.72071	1.18007	1.62919	0.72433	0.913386	0.687802	1.18395	0.836219	1.02564	0.917379	1.20616	1.27128	1.07474	0.916957	1.32425	1.18534	0.92352	1.11667	0.874833	1.06119	1.16381	1.05307	0.909489	1.12691	1.00413	0.933991	0.850499	1.17034	1.06686	1.22038	1.07979	1.15681	0.934358	0.798686	1.03906	1.00446	0.904279	1.0444	1.29406	1.16589	0.960606	0.971444	1.08522	0.873801
846	chr3	12267875	12824690	0.986549	1.09215	1.8748	0.987207	1.00299	0.852835	0.788778	0.524825	1.48796	0.78843	1.20862	1.20072	1.16158	0.767974	1.38022	1.0256	1.06283	0.870033	0.986587	0.927221	0.880064	1.02737	1.31975	1.03416	0.983178	1.23293	1.01195	0.962716	0.996274	0.936323	0.987595	0.686387	1.23873	1.03593	0.987143	0.871967	0.612386	1.06806	1.25271	0.87508	1.39728	1.44641	1.06265	1.18501	0.896844	1.36117
847	chr3	12824691	13329740	0.769636	1.27517	1.83556	1.35076	1.20257	0.860489	0.927075	1.21313	1.64386	0.93129	0.909969	0.890833	0.818111	1.09783	1.16221	1.06591	0.832324	1.273	0.915675	1.07684	0.885643	1.08522	0.901231	1.25745	1.15278	1.07914	1.24641	1.32959	0.969429	0.672749	1.31064	0.971601	0.91117	0.954797	1.00644	0.937727	0.859534	1.11042	1.14241	1.17985	0.856332	1.40492	1.23415	0.926978	1.38503	0.838167
848	chr3	13329741	13841545	1.06027	1.28651	2.1672	0.906898	0.883684	0.702029	1.17401	0.881022	1.13417	0.76398	1.38728	0.952362	1.2917	0.869953	1.22108	0.98376	0.625132	1.24018	0.948326	1.17559	1.11675	1.18711	0.871783	1.42596	0.961703	1.06246	1.25724	1.08754	1.35063	0.644112	1.06708	1.36784	1.11444	1.20475	1.18808	0.680375	0.884777	1.16608	1.36232	1.08023	0.946132	1.46625	1.2836	1.29246	1.29415	0.651077
849	chr3	13841546	14388560	0.853025	1.05717	1.74945	0.984783	0.92838	0.865954	1.21916	0.89971	0.865387	0.747018	1.10221	0.888448	1.26265	1.12994	1.13067	1.01868	1.10049	1.16525	0.835818	0.978856	1.08486	0.785074	1.52506	0.986187	0.926911	1.38198	0.893915	0.574655	0.908436	0.760294	1.10585	1.12723	0.774433	1.0712	1.28467	0.927465	0.775396	1.02885	1.09852	1.17308	1.01869	1.29672	0.950413	1.19642	0.963635	0.835239
850	chr3	14388561	14888348	1.21581	0.918017	1.74948	0.995979	1.13006	0.647072	1.2493	0.897386	1.7985	0.833578	1.04879	0.778834	0.89816	1.12361	1.79638	0.87156	0.91794	1.57709	0.864164	0.678685	1.09416	1.20223	1.53561	1.47869	0.654653	1.2791	0.912305	0.988742	0.860624	0.719982	1.28379	1.14387	1.32898	1.15597	1.06628	0.733774	0.73967	0.866261	1.12503	1.20463	1.15502	1.00605	0.594015	0.889998	1.37192	1.20656
851	chr3	14888349	15420259	0.910009	1.00709	1.49223	1.12801	1.00348	0.667773	0.945936	0.494826	1.21617	0.666504	1.25459	1.13896	1.1215	0.938461	1.22037	0.918869	1.32552	1.14107	1.0896	0.946599	1.0263	1.03771	1.60493	0.951286	1.08789	1.03688	1.00572	0.851464	0.980628	0.720902	1.3915	1.06649	0.988955	1.05651	0.802132	0.777198	0.515074	1.01569	1.39002	0.782748	0.627811	0.933674	0.723066	1.12746	0.945524	1.37659
852	chr3	15420260	15973454	1.00541	1.24455	1.7254	0.897582	0.886021	0.666612	0.866529	1.20886	1.05546	0.977361	1.22731	1.09794	1.02692	1.0284	1.08716	0.990451	1.3135	1.10264	0.946482	1.05888	1.30461	1.09124	1.32086	0.776051	1.20439	1.22333	1.01164	0.904952	0.868622	0.770733	1.15427	0.980759	0.943049	1.12714	0.762792	0.919703	0.899515	1.40379	0.975731	1.24834	0.529929	1.07836	0.912137	1.35496	0.867555	1.46513
853	chr3	15973455	16482719	1.02624	0.977832	1.82112	1.05475	1.15246	0.951534	0.961738	0.633202	0.812966	1.04499	0.991286	0.940884	0.971498	1.14717	1.08365	0.873862	1.12689	1.21305	0.902599	0.94722	1.0987	0.967414	0.775722	0.997847	1.11754	1.25763	1.03051	0.874878	1.01871	0.778211	0.957001	1.14948	0.969857	1.11672	0.942964	0.930525	0.927896	1.08422	1.02528	0.960694	1.46452	0.893791	0.918365	1.42138	0.899932	1.2045
854	chr3	16482720	17033660	1.06928	1.13272	1.6375	0.857481	1.14694	0.59771	1.25342	0.897893	1.13058	0.953704	0.984527	0.865713	0.722578	0.879538	1.02936	0.978896	1.03982	0.960326	0.805457	0.965284	1.14617	1.3276	0.861447	1.18181	1.04857	0.870895	0.92671	0.766676	0.999972	1.05324	1.03273	1.00675	0.811051	1.16219	0.899742	0.920406	0.968106	1.0217	1.41524	1.19021	1.23677	1.11254	1.23961	0.963486	0.967089	0.8413
855	chr3	17033661	17612527	0.954235	0.962714	1.49344	1.17734	0.959455	0.989854	0.831276	0.769233	1.11939	0.89386	0.873464	0.834749	1.03077	0.664539	1.23713	0.811886	1.01194	0.842009	0.788742	0.863212	1.01926	0.945312	1.04926	1.23556	1.02669	1.1498	0.945972	1.07761	0.956078	0.825086	0.851045	1.24579	0.915975	0.93149	0.802654	0.888813	0.486555	0.922703	1.0351	0.916401	0.744617	0.86881	0.702948	1.09796	1.18824	1.02428
856	chr3	17612528	18199498	0.583747	0.611749	0.903262	0.645871	0.600349	0.32211	0.488666	0.550182	1.23531	0.78814	0.844588	0.293618	1.03213	0.406063	1.38671	0.537648	0.286667	0.525717	1.1291	1.06841	0.80426	0.994782	0.575878	0.61971	1.19868	0.695745	0.359985	1.044	0.536527	0.879599	0.384249	1.15138	0.9147	0.617855	0.304268	0.390303	0.801237	0.519714	0.686191	1.05376	0.538412	0.54885	1.07659	1.17877	1.24935	0.821478
857	chr3	18199499	18769694	0.626296	0.540858	0.942885	0.808118	0.51286	0.385841	0.551648	0.661979	0.990586	0.895092	0.531279	0.504732	1.11829	0.608624	1.15129	0.552309	0.50822	0.707503	0.88774	1.10061	0.606838	0.85729	0.62914	0.682303	1.2039	0.794015	0.592958	1.05486	0.530196	1.15575	0.51235	1.23814	1.03871	0.52069	0.414082	0.354712	0.760106	0.655615	0.746871	1.20618	1.55498	0.485133	1.00122	1.89077	1.00055	0.984038
858	chr3	18769695	19404742	0.684673	0.61536	0.776374	1.35301	0.466366	0.441945	0.56706	0.34736	1.02423	0.906184	0.676655	0.570902	1.09664	0.582669	1.64796	0.474472	0.444043	0.6127	0.750692	1.11928	0.908149	0.702593	0.622844	0.605085	0.829665	0.849189	0.572907	1.08052	0.378712	0.743026	0.494795	1.05079	0.858446	0.621668	0.573172	0.469496	0.626732	0.425397	0.618667	1.0928	1.46244	0.606638	1.23115	1.5963	1.21361	0.750691
859	chr3	19404743	20054714	0.582438	0.81757	0.873742	1.30977	0.4833	0.433681	0.569846	0.660413	1.12105	0.74915	0.483883	0.723035	1.55049	0.543618	1.3333	0.624646	0.745125	0.584697	0.813117	1.06429	0.632583	1.16192	0.590995	0.623106	1.11962	1.09269	0.359549	0.924144	0.55076	0.885232	0.412068	1.17948	0.981576	0.557614	0.495212	0.475904	0.784275	0.592842	0.796386	1.17836	0.910773	0.698746	1.3535	1.49927	0.95571	0.769226
860	chr3	20054715	20656821	0.472022	0.522697	0.660599	0.988526	0.519734	0.51136	0.579582	0.654211	1.07938	0.885989	0.700807	0.437162	1.00053	0.367982	1.49111	0.576967	0.72163	0.747724	0.953318	0.928561	0.675731	1.45183	0.439322	0.675429	1.20176	1.30271	0.468783	1.15877	0.470659	0.816244	0.554835	0.94108	1.11059	0.722683	0.541919	0.394527	0.752651	0.539835	0.688852	0.983484	1.74922	0.593274	0.852689	1.14783	1.08554	1.01056
861	chr3	20656822	21281199	0.538863	0.508321	0.541157	1.14552	0.43865	0.333045	0.69007	0.472277	1.05224	0.89989	0.471412	0.257132	1.34814	0.636862	1.24115	0.570977	0.613581	0.53015	0.897465	0.980367	0.630782	1.17494	0.489909	0.758639	0.755639	0.874352	0.466247	0.890653	0.640866	0.947158	0.46872	1.11082	0.836213	0.567235	0.635205	0.610011	0.794059	0.419139	0.575205	0.987452	1.78658	0.743244	1.05147	1.31114	0.810266	1.02902
862	chr3	21281200	21873979	0.510678	0.740733	0.613984	1.11892	0.371004	0.499314	0.497099	0.601808	1.06534	0.947759	0.743791	0.668772	0.995752	0.465424	1.23786	0.523881	0.934472	0.639309	0.928096	1.16941	0.744769	0.891598	0.71302	0.825112	1.03868	1.19103	0.553423	0.816039	0.428237	0.969499	0.585544	0.984891	1.00095	0.68654	0.652192	0.469754	1.52021	0.622282	0.766026	1.1712	1.70926	0.618722	1.18326	1.27035	1.20756	1.06438
863	chr3	21873980	22486457	0.648283	0.519342	0.543508	1.03132	0.571912	0.346705	0.480684	0.441565	0.866074	0.831427	0.477647	0.703583	1.13584	0.519828	1.12288	0.547986	0.889307	0.569227	0.947596	0.891251	0.656853	1.04129	0.519803	0.718367	1.18244	1.39932	0.601224	0.968941	0.381847	0.879606	0.531858	0.948421	0.945449	0.505441	0.505594	0.431718	1.17785	0.554738	0.426711	1.25949	1.11832	0.481113	0.921728	1.28865	0.828508	0.4453
864	chr3	22486458	23112838	0.578065	0.769124	0.812911	1.10627	0.534646	0.406893	0.599553	0.402613	0.962861	0.758267	0.439726	0.359851	1.0268	0.461127	1.08888	0.555369	0.603665	0.521616	0.969948	0.930811	0.771189	0.906018	0.775842	0.574483	0.898894	1.15055	0.654693	0.995353	0.43583	0.749397	0.531783	1.1418	0.949783	0.574996	0.591224	0.525738	0.419456	0.656705	0.669064	1.12012	1.74454	0.461284	1.03707	1.0619	1.04971	0.702357
865	chr3	23112839	23689971	0.465903	0.327865	0.733548	1.23706	0.473741	0.57348	0.537424	0.409882	0.728119	0.680059	0.600833	0.589694	1.15308	0.643152	0.797029	0.485136	0.712958	0.495037	0.927983	0.836803	0.742393	0.608867	0.626935	0.552889	0.909455	0.960744	0.628396	1.16337	0.40553	0.913318	0.549233	1.1845	1.14757	0.513624	0.604425	0.497131	0.787533	0.297841	0.748089	0.797754	0.743059	0.245651	0.828864	1.61523	1.03214	0.55761
866	chr3	23689972	24242283	0.594005	0.275711	0.759402	0.827625	0.487758	0.402095	0.441825	0.527425	1.01506	0.577964	0.563147	0.403082	1.12573	0.339365	0.808798	0.377582	0.473397	0.517627	0.860485	0.925448	0.736597	0.932244	0.670524	0.415218	0.819479	0.797767	0.527837	0.743835	0.552592	0.941217	0.493414	1.1929	0.945065	0.486963	0.592868	0.39226	0.915476	0.440657	0.468255	1.19199	0.641248	0.354127	1.05156	0.890007	0.997491	0.891559
867	chr3	24242284	24803087	0.475304	0.378128	0.648911	1.39586	0.59562	0.21661	0.67913	0.47968	0.90821	0.840327	0.497223	0.286455	1.01697	0.656921	0.787591	0.411082	0.952683	0.37546	1.03692	0.924772	0.541088	1.14392	0.732343	0.590391	1.09556	1.29267	0.599351	0.903559	0.479215	0.891047	0.476526	0.980592	0.961597	0.612663	0.472887	0.475087	0.652955	0.213468	0.338254	0.832257	1.39316	0.321876	1.00467	1.40968	0.868928	0.78784
868	chr3	24803088	25384262	0.637364	0.406704	0.719309	0.887553	0.324123	0.289846	0.543069	0.524851	1.39129	0.912719	0.712251	0.610574	1.35396	0.703567	1.09691	0.586307	0.732369	0.439855	0.749228	0.848127	0.765917	1.30698	0.821044	0.544999	1.1094	1.14817	0.532874	0.978329	0.496551	0.858331	0.605368	1.23634	1.08227	0.63055	0.439903	0.54096	0.877381	0.452856	0.787845	1.07259	0.923497	0.406907	1.07324	0.892501	1.34618	0.779827
869	chr3	25384263	25919453	0.565103	0.483323	0.654711	0.762933	0.564869	0.32495	0.484303	0.447023	1.06567	0.922812	0.582979	0.838592	0.947475	0.503227	0.832552	0.530113	0.761462	0.448282	0.726353	0.784262	0.575367	0.910877	0.662845	0.836308	0.964591	0.932642	0.418193	1.16941	0.450282	0.838659	0.508177	0.683043	1.08718	0.545266	0.506576	0.490568	1.04452	0.215109	0.537578	0.994023	1.05956	0.383344	1.21503	0.865574	1.04605	0.796677
870	chr3	25919454	26522699	0.380248	0.375014	0.361447	0.916902	0.515758	0.373119	0.614134	0.582554	0.9029	0.796251	0.698886	0.511014	1.0114	0.592577	1.0557	0.597572	0.746897	0.573025	1.07557	0.869347	0.680177	1.04045	0.0408859	0.831991	1.15364	1.09479	0.599351	0.88017	0.420756	0.935017	0.570458	1.00395	1.01356	0.469413	0.473069	0.351568	0.945358	0.352486	0.540972	1.03897	0.63761	0.190397	1.08649	1.16543	1.14346	0.75398
871	chr3	26522700	27126398	0.547569	0.365481	0.366466	1.0319	0.493209	0.329835	0.414885	0.470107	1.22581	0.844204	0.912177	0.338524	1.26184	0.440269	0.894965	0.569528	0.308152	0.62352	0.507943	0.958031	0.729323	1.04024	0.510753	0.713886	0.980112	1.00351	0.603087	1.38066	0.321901	0.869472	0.481519	1.05221	0.74785	0.460347	0.711787	0.401405	1.06496	0.198463	0.943932	0.836157	0.39394	0.322343	1.1369	0.978486	0.870515	0.886436
872	chr3	27126399	27702608	0.597231	0.235063	0.618134	1.0394	0.558828	0.273392	0.461717	0.436196	0.881993	0.706736	0.549079	0.666188	0.966828	0.425538	1.16274	0.526959	0.346247	0.434173	0.871266	1.11074	0.535249	1.07932	0.773807	0.692731	0.864447	1.25796	0.520994	1.00269	0.450005	0.820139	0.561363	0.839814	0.869308	0.506571	0.596887	0.317566	1.31364	0.217667	0.835693	1.32212	0.948611	0.348746	1.16036	0.812539	1.13524	0.660541
873	chr3	27702609	28309106	0.664734	0.30893	0.907124	0.925397	0.361631	0.422554	0.477	0.317296	0.890115	0.84977	0.579586	0.400779	1.09443	0.380278	1.23127	0.507385	0.237923	0.457452	0.932992	0.928706	0.642616	0.849946	0.359604	0.848488	0.981057	1.10748	0.401807	0.711551	0.638128	1.08299	0.458121	1.09562	1.41344	0.558634	0.574511	0.375803	0.752676	0.446013	0.871401	0.947851	1.14072	0.374407	0.947432	0.823915	0.928102	0.641462
874	chr3	28309107	28896702	0.517666	0.330897	0.6318	0.983318	0.522469	0.505748	0.464927	0.649663	1.06482	0.717274	0.773242	0.530924	1.14107	0.486746	1.15907	0.625742	0.585108	0.52202	0.978851	0.947153	0.655367	0.943424	0.711329	0.573561	0.96057	0.932665	0.384044	1.00156	0.519158	0.812806	0.513509	1.04312	0.600854	0.534709	0.448934	0.385937	0.973237	0.28664	0.593483	1.01236	1.05648	0.337629	0.953883	1.19097	0.833692	0.928149
875	chr3	28896703	29459724	0.534221	0.362039	0.62256	0.762289	0.456809	0.425097	0.664438	0.344402	0.876732	0.663539	0.584072	0.506196	0.961252	0.566033	1.31593	0.58841	0.566558	0.349173	1.23442	0.694105	0.572552	1.12899	0.6049	0.683586	0.961161	0.909508	0.484438	0.967724	0.326949	0.85421	0.610432	1.1877	1.00635	0.493988	0.472127	0.38336	1.05647	0.200813	0.481206	1.08752	0.93826	0.169038	1.11615	0.819385	1.27998	0.646169
876	chr3	29459725	30048496	0.480594	0.438976	0.670583	0.834387	0.451897	0.37832	0.539766	0.658186	0.994945	0.76792	0.484315	0.22032	1.27278	0.549763	1.16281	0.471369	0.365656	0.366027	1.2357	0.744209	0.616757	0.974501	0.945306	0.533643	1.19048	0.749947	0.477689	1.12397	0.41781	0.806166	0.476138	0.756066	1.07552	0.590262	0.55172	0.420067	1.20316	0.196336	0.362771	1.01014	0.592225	0.124793	1.06447	0.863909	1.15353	0.822358
877	chr3	30048497	30618875	0.613873	0.305527	0.815249	0.924529	0.502172	0.36501	0.441784	0.470982	0.835227	0.519888	0.620865	0.357142	0.938795	0.581523	0.932034	0.478139	0.313329	0.28662	1.15304	0.945937	0.624932	1.07581	0.91423	0.579702	1.22899	1.05761	0.564667	0.850023	0.532013	1.06816	0.53176	1.07282	1.16679	0.424201	0.459382	0.338021	0.860089	0.323469	0.599578	0.767208	0.920724	0.146279	0.872059	0.723315	1.17304	0.793709
878	chr3	30618876	31160569	0.52731	0.351772	0.489687	1.04447	0.571894	0.232933	0.690694	0.426173	1.00047	0.712887	0.466852	0.151688	1.22098	0.399922	1.29086	0.460558	0.501001	0.454732	1.15069	0.699519	0.572005	1.25229	0.803476	0.775407	1.03617	0.855374	0.512168	1.00541	0.566587	1.12611	0.502421	0.718073	0.707006	0.471406	0.503271	0.513112	1.42812	0.298761	0.772896	0.818508	0.746397	0.0950704	1.05896	1.19051	1.03601	0.528907
879	chr3	31160570	31715065	0.502394	0.395318	0.900367	0.806464	0.683517	0.398093	0.611407	0.442868	1.22476	0.812686	0.515508	0.442203	0.753794	0.691995	1.17209	0.652396	0.524566	0.422052	0.76131	0.908813	0.653109	0.922248	0.666249	0.573637	0.86947	1.16438	0.649987	1.01816	0.513559	0.747654	0.529536	0.713462	1.03726	0.517867	0.449896	0.351302	0.609139	0.214052	0.640231	0.919725	0.609917	0.109024	0.849203	0.858274	1.1651	0.688758
880	chr3	31715066	32283210	0.533234	0.246278	0.812794	1.24407	0.488663	0.419474	0.469765	0.334649	0.868028	0.62991	0.633124	0.24048	1.28254	0.614103	1.15859	0.529646	0.453216	0.503517	1.00083	1.17739	0.687295	1.24615	0.7905	0.706329	1.02462	0.922825	0.467617	0.997648	0.497671	0.987473	0.458614	0.813817	1.05808	0.568092	0.528762	0.587293	0.951366	0.207534	0.7578	0.80883	1.03441	0.12735	1.36879	1.21534	1.23862	0.610529
881	chr3	32283211	32860997	0.443087	0.29264	0.745571	0.743223	0.618763	0.369205	0.481559	0.768437	0.876341	0.608029	0.63156	0.240656	1.0055	0.517239	1.44861	0.555554	0.454422	0.453902	1.06469	0.545979	0.74283	0.953618	0.85992	0.732614	1.00628	0.963028	0.45191	0.898535	0.309966	0.911949	0.539082	0.963954	1.02707	0.468223	0.430789	0.452385	1.03051	0.208737	0.351496	1.1718	0.921479	0.202973	0.905773	1.19169	0.875235	0.492353
882	chr3	32860998	33436127	0.471399	0.212345	0.689244	0.989395	0.557573	0.417251	0.420771	0.708362	0.891345	0.626747	0.569265	0.441704	1.01639	0.5286	0.980752	0.514504	0.298094	0.423645	0.944611	0.788234	0.683541	1.23473	0.926582	0.469021	0.964138	1.05921	0.616681	0.863545	0.574313	1.03491	0.56171	1.03813	0.752915	0.530162	0.464065	0.331713	0.992405	0.398174	0.648617	0.847029	0.468284	0.266317	1.1425	1.12244	0.892333	0.909608
883	chr3	33436128	34031680	0.596292	0.302796	1.00304	1.34218	0.640212	0.582704	0.57458	0.600082	0.844238	0.743988	0.719501	0.851509	0.979797	0.787982	0.927161	0.571869	0.588438	0.418797	0.897248	0.647007	0.640652	0.985218	1.14565	0.774793	0.795416	1.1346	0.782171	0.983992	0.639949	0.992773	0.715204	1.14803	0.828887	0.630285	0.525339	0.427553	0.77782	0.501621	0.792699	0.835566	0.454541	0.19	0.753258	1.06894	1.05439	0.670967
884	chr3	34031681	34615225	1.07149	0.958611	1.72955	0.847844	1.3418	0.532068	0.736205	0.819224	1.1432	1.2021	1.19475	0.710915	0.915918	1.03066	0.812417	0.969438	0.922994	1.12299	1.19936	1.02748	1.14056	1.09387	1.58332	1.32963	0.987952	0.98146	1.00998	1.02912	1.0994	1.23531	1.33598	1.33769	0.904015	1.08943	1.19014	0.960547	1.13705	0.802382	0.994303	1.18815	0.412433	0.681637	1.14655	0.898237	1.11487	0.971589
885	chr3	34615226	35261961	0.831721	0.970426	1.9153	0.797456	1.20389	0.421932	0.907332	1.00231	1.19711	1.23336	1.27015	0.913388	1.25414	1.44134	1.06693	1.03018	1.04995	0.933237	0.896986	0.841674	1.025	1.36388	1.21544	1.21077	1.31594	0.79249	1.21712	0.869836	1.09878	1.28063	1.35033	1.30724	0.834965	1.1111	1.13298	0.797375	0.958195	0.859592	1.1117	0.922066	0.827011	0.688585	0.938975	1.16439	0.944598	1.45206
886	chr3	35261962	35898526	0.97188	0.695024	1.7781	1.26633	1.34318	1.06433	1.02872	0.958911	1.02825	1.20408	1.40839	0.534569	0.996639	1.24858	1.11476	0.968688	0.929649	0.989641	0.671397	0.904992	0.998372	1.12427	1.09222	1.31698	1.17292	1.1867	1.14139	0.982509	1.14273	1.28253	1.22806	1.11091	0.692264	1.04338	0.986208	1.02823	0.887663	0.696172	1.13649	1.03582	1.0776	0.751703	1.1134	1.02065	0.763471	1.08911
887	chr3	35898527	36503142	1.06467	1.15178	1.67483	1.62385	1.00482	0.821441	0.710407	0.96167	1.03909	1.04321	1.3198	0.640838	0.954416	1.06555	1.19361	0.822621	0.726145	1.23074	0.910493	0.894371	1.02017	0.971877	0.676138	1.00318	0.950986	0.939457	1.12888	1.13305	1.13549	1.12639	1.32588	1.40333	1.12779	0.924184	0.864818	0.983452	0.764895	0.854709	1.39863	1.05722	0.885216	0.782668	1.23034	1.76507	0.776421	1.38881
888	chr3	36503143	37064668	1.07889	0.919092	1.6898	0.747614	0.888424	0.814286	0.623287	0.95482	1.12577	1.33824	1.00456	0.782837	1.08398	1.05629	1.29962	0.960922	0.623963	0.95516	0.859412	0.849391	1.03704	1.02586	1.07697	1.24746	0.724267	1.13432	1.22503	1.17944	1.08993	0.991257	1.30853	1.05653	1.24487	0.989969	1.32929	1.0719	0.677946	0.758207	1.15688	1.13582	1.52577	0.506967	1.06049	1.12852	1.19514	1.1621
889	chr3	37064669	37616422	0.84116	0.773821	1.72496	0.811706	0.899941	0.581787	1.06013	1.08583	1.16687	1.09305	1.20998	0.989214	0.954705	1.1392	1.36312	0.872531	1.28138	0.91789	1.05946	1.07958	1.09538	0.935767	1.21123	1.01635	1.02799	1.15016	1.07841	0.821461	1.06886	1.15438	1.27619	0.997956	0.90739	0.88385	0.837595	0.736754	0.986095	0.74562	0.985736	0.780907	1.62477	0.889415	1.38113	1.32214	0.896208	1.20014
890	chr3	37616423	38137754	0.976572	0.877188	1.83731	1.33225	0.973629	0.47933	1.09726	0.972883	1.23714	1.00509	1.11671	1.05184	1.04348	0.760921	1.58972	1.02256	1.04063	1.21235	1.03604	1.10622	1.15465	0.86279	0.993814	1.2562	0.904848	1.06163	1.06145	1.27732	1.01057	1.0412	1.15651	1.05239	1.19574	1.13357	1.07129	0.954615	1.31187	0.78876	1.36485	0.843719	1.51902	0.629128	1.27431	1.26599	0.902176	1.45558
891	chr3	38137755	38666093	1.12504	0.830079	1.72131	1.01039	1.09428	0.647532	1.27319	1.20814	0.954573	1.18927	1.024	0.73525	1.14071	1.09742	1.24892	0.954962	0.769681	0.882078	0.663275	1.01805	1.17311	1.0475	1.26928	1.05384	0.932367	0.857738	1.11661	0.896178	0.963627	0.7902	1.11044	1.26619	0.8247	1.07387	1.02952	1.00788	1.28565	0.884563	1.05104	1.12527	1.0924	0.662189	1.01615	1.25891	0.753129	1.46283
892	chr3	38666094	39209937	1.27798	1.09858	1.49531	1.20883	1.24625	0.834615	1.10067	0.894974	1.32173	1.16901	1.32062	0.973679	1.11206	1.04647	1.8397	1.11055	0.578324	0.931903	0.746284	0.801361	1.04696	1.32212	1.59219	1.24245	0.932162	0.889952	0.974951	1.18802	0.985447	1.07942	1.05793	1.09203	0.731812	1.10973	1.05845	0.771328	1.28137	0.77053	1.74741	1.09137	0.757505	0.570917	1.27887	1.31452	0.960127	1.52684
893	chr3	39209938	39808083	1.0825	0.813399	1.27878	0.815474	0.799831	1.14943	1.10396	0.933193	0.945631	1.22688	0.922261	0.826534	1.07217	0.717709	1.58174	0.733052	0.9169	0.943278	1.25123	1.04999	1.14564	1.10825	1.30058	1.45824	1.0287	0.975107	1.00661	0.931465	1.09988	0.905032	0.913242	0.988406	1.17378	0.875177	1.00872	0.94665	1.29483	0.877863	1.0663	1.04229	1.32406	0.705657	0.777602	0.883203	1.04038	0.918628
894	chr3	39808084	40389384	0.862232	1.28477	1.63422	0.811656	0.985445	0.469201	1.09833	1.29433	1.14521	0.98543	0.970925	1.42044	1.40393	1.11661	1.27632	0.920016	1.40699	1.05933	0.747192	1.20103	1.17329	1.2751	0.889347	1.05542	1.23809	0.769101	1.14888	1.16221	1.27294	0.98735	1.37071	1.2697	1.01033	0.987306	1.00556	0.790285	0.725619	0.766992	1.11342	1.13951	2.21113	0.738664	0.944577	0.961298	1.00208	0.787896
895	chr3	40389385	40927082	0.903711	0.944976	1.84277	0.793744	0.891019	1.08285	1.03269	0.804746	1.02621	0.890892	1.23363	1.12302	1.20021	1.57621	1.37542	0.875438	1.21305	0.915927	0.814421	0.833001	1.25494	1.32983	1.03316	0.899585	1.30252	1.18981	0.675384	0.783414	0.962528	1.0452	1.41008	1.00327	1.04799	0.890674	0.997531	1.0519	1.10023	0.651994	1.44992	0.877616	1.37836	0.759258	0.978384	1.3879	1.11445	1.08321
896	chr3	40927083	41473589	0.976053	1.11893	1.47248	1.0249	0.975511	0.946545	1.20725	0.843435	0.998816	0.9377	0.928799	0.951688	1.1592	1.29922	1.66726	0.898433	1.10275	1.28698	0.994362	1.09285	1.13221	1.33616	1.10579	1.25108	1.02794	0.833714	0.641783	0.882634	0.918274	1.1572	1.45875	0.950479	1.03027	1.22776	1.1021	1.05049	0.801388	0.877582	1.29731	0.957135	0.828336	0.657012	0.911899	1.12466	1.06942	1.22119
897	chr3	41473590	42083973	1.02351	1.01705	1.36628	0.925792	1.20384	0.937771	1.14969	1.05527	0.858687	0.900363	1.15755	1.05769	1.0161	1.06344	1.28943	1.02805	1.26328	0.892606	1.02438	1.1143	1.21293	1.55331	1.25075	1.21651	1.03233	1.39313	1.13946	1.31316	0.888734	0.99167	1.12547	1.21502	0.91055	1.09571	0.939098	0.951626	0.513181	0.747655	0.980832	1.12639	1.84436	0.689742	1.02607	1.37876	1.0938	1.07092
898	chr3	42083974	42606346	0.839794	0.90148	1.11344	0.891761	1.15432	0.967549	1.19607	0.94476	0.795765	0.717562	1.14872	0.806624	1.01058	1.04152	1.29849	1.01133	1.28938	1.00837	0.713034	0.967071	1.25615	1.18097	0.888264	1.14025	0.708418	1.06118	0.934424	1.22229	0.983085	1.02432	1.03245	0.877242	1.03091	1.03721	0.826924	1.04163	0.865245	0.88554	1.0876	0.998792	0.934941	0.637601	0.971959	0.974233	1.12503	1.29029
899	chr3	42606347	43163349	0.84701	0.888074	1.67227	0.797014	1.18601	0.716434	1.24218	0.968922	1.14312	0.844064	0.98365	1.12327	1.00435	1.04742	1.20879	1.00647	1.14209	0.84059	0.761849	0.927738	1.20766	0.913996	1.14105	1.14349	1.25179	1.05697	0.948992	1.02508	0.985748	0.940497	1.053	1.05577	1.00395	0.875629	0.945898	0.971148	1.37783	0.840195	1.3847	0.922776	0.794267	0.717999	1.06637	1.153	1.02986	1.22418
900	chr3	43163350	43694244	0.980198	0.841419	1.48983	0.874859	0.863281	0.726622	0.926357	0.736013	0.806001	0.849604	1.08767	0.832546	0.921838	0.955977	1.41916	0.886488	1.03118	0.746021	0.650319	0.786768	1.06002	0.78396	1.36159	1.35968	0.937666	0.940217	0.98553	1.12985	0.988483	0.86942	1.26118	1.17605	1.0223	0.991669	1.08552	0.805722	1.11542	0.736805	0.883889	1.13215	0.442418	0.736481	0.864215	1.30508	0.929164	1.1499
901	chr3	43694245	44214139	0.88284	0.682073	1.63884	1.0143	0.749857	0.829466	1.17692	0.744056	0.975922	1.0567	1.11115	0.753061	1.12713	1.02924	1.16053	0.967051	1.04522	0.939351	0.847789	1.21096	1.24164	1.08733	1.23529	1.02143	0.885625	1.1014	1.02006	0.905988	1.09591	0.758407	1.14033	1.11836	1.00006	0.899973	0.811452	0.76939	1.2219	0.670931	0.961021	1.00373	0.619146	0.79871	1.05424	0.977053	1.16588	1.39999
902	chr3	44214140	44782404	0.932345	0.669908	1.51537	0.698296	0.893502	0.657328	1.11315	0.970502	0.808286	0.927158	1.03862	1.06211	0.961128	0.885196	1.29374	0.928547	1.59365	0.613091	0.97967	0.714422	1.04515	1.21548	0.992255	0.99982	1.28335	1.08423	0.868652	0.895433	0.904228	1.16396	1.05801	1.13458	1.25635	1.09914	0.908369	1.12146	0.861096	0.659584	1.29206	0.963934	0.670561	1.09202	1.18401	1.01005	0.82856	1.10698
903	chr3	44782405	45298111	1.03181	0.829635	1.70306	0.825833	0.995038	0.93957	0.738621	1.11896	1.32191	0.838158	0.703566	1.06205	1.09316	0.894309	1.53971	1.043	1.29622	0.902612	0.979106	1.02807	1.16069	1.09637	1.03473	1.15389	1.22335	1.38138	0.963519	1.25677	0.844613	1.09144	1.11794	1.27882	1.24233	0.879126	0.882314	0.745261	0.635625	0.615769	1.30511	0.992097	0.771545	1.23582	1.0264	0.667108	0.579457	0.804618
904	chr3	45298112	45822942	0.827863	0.993612	1.85688	0.842184	0.862308	0.954605	0.795747	0.914841	1.18772	0.897449	1.21501	0.991245	0.920676	0.940789	1.23179	0.831035	1.18232	0.894845	1.01169	0.903701	1.09478	1.07964	1.24505	1.18774	0.877931	1.00309	1.03697	0.552881	0.857051	1.37648	1.07505	1.42934	0.912595	1.06037	0.803788	0.894599	1.13228	0.796433	0.966183	1.03335	0.669159	0.825506	0.813218	0.891356	1.07273	1.10192
905	chr3	45822943	46339854	0.775021	0.824638	1.72789	0.943556	1.0491	1.10636	0.842659	0.730745	1.54892	1.01689	1.20834	1.28717	0.958027	1.39647	1.4071	0.861746	1.3955	1.05884	0.887895	0.799734	1.05586	1.23206	1.03254	1.15595	1.17021	0.928398	0.915994	0.921149	1.02948	1.13803	1.15193	1.22642	1.1958	1.01239	0.917383	0.871609	0.805683	0.768142	1.07658	1.13565	0.588389	0.95078	0.803168	0.658012	1.07214	1.3045
906	chr3	46339855	46889781	1.18029	0.74597	1.89233	0.670082	0.993403	0.598421	0.882658	0.751524	0.910539	1.07765	0.954635	0.919075	1.1595	0.78251	1.43242	0.818918	1.18169	0.849261	0.922073	1.05984	1.16685	0.907187	1.07635	1.30667	1.0211	1.02727	1.07503	0.703392	1.03937	1.14855	0.952383	1.09914	0.511276	0.984177	0.9556	0.999377	0.897871	1.01881	1.00069	0.773029	0.868737	0.777838	0.941481	1.15667	0.935692	1.06649
907	chr3	46889782	47446010	0.949986	0.7561	1.37439	0.815302	1.00956	0.740987	0.728772	0.707396	0.862831	1.01622	0.892382	1.14396	1.07698	0.982239	1.51288	1.11141	1.21392	0.873675	0.806231	1.07309	1.45672	1.23791	1.58644	0.944173	1.04879	1.00963	1.14869	0.871657	1.00906	1.058	1.15192	1.00958	0.814111	1.01585	0.876607	1.08335	0.931573	1.00273	1.36033	1.12202	1.36935	0.938057	0.876922	0.969594	1.10553	0.663199
908	chr3	47446011	48027036	0.96089	0.814043	1.20211	1.03457	0.999384	1.49871	0.897379	0.623301	1.23505	1.08771	0.903633	0.836716	0.994208	0.934214	1.38178	1.20202	1.16682	0.672907	1.07028	0.648028	1.17964	1.33722	1.06161	1.19266	0.857743	1.33021	0.935006	1.06277	1.07344	0.975634	0.972508	0.721149	0.973265	1.04254	0.854976	1.13356	1.07734	0.745096	1.02739	1.11619	0.997271	1.08507	1.08962	0.984387	1.24904	1.10338
909	chr3	48027037	48600397	1.13264	0.6073	1.06434	0.978662	0.82989	0.987002	0.944743	0.447221	1.34873	1.11058	0.657692	1.06501	0.804666	0.904939	1.54602	1.12126	1.15516	0.964686	0.948701	0.878053	1.49246	1.27776	1.04434	1.15287	1.02453	1.63938	1.09204	0.979208	1.00938	1.3498	1.08617	0.981231	0.627369	0.917726	0.935567	1.17678	1.06852	0.709036	1.09704	1.12257	0.858769	1.14782	1.07456	0.858039	0.956839	1.43737
910	chr3	48600398	49149706	1.19494	0.699079	1.15187	0.945145	1.06008	0.623696	1.09655	0.663664	1.12259	0.823296	0.734396	1.0415	0.901582	0.974446	1.28531	1.00578	1.24327	0.823444	1.28588	0.835933	1.2325	1.06178	1.31816	1.26198	1.02751	1.31378	0.958753	0.737178	0.948596	1.15164	1.08364	0.877419	1.35758	0.997916	1.04349	0.963416	0.945503	0.692992	1.22038	0.95248	1.25646	1.09011	1.25607	1.22027	1.14413	1.15134
911	chr3	49149707	49700510	1.2693	0.864796	1.04734	1.04475	0.912882	1.15368	0.991098	0.952821	0.97697	1.1178	1.15925	0.905628	1.03848	0.739959	1.51162	1.00039	0.977391	0.726825	0.873981	1.09815	1.20608	0.942889	1.23637	1.25142	1.19862	1.18328	0.863948	1.34472	0.775578	1.11792	1.19136	0.900693	0.823704	0.920784	0.677081	1.22048	1.20064	0.802366	1.32439	1.04544	2.53577	0.994939	0.783231	1.18519	0.82168	1.0595
912	chr3	49700511	50233179	0.965449	0.809744	1.45065	0.929206	0.78216	0.929551	0.905266	0.796903	0.819917	0.840622	1.09354	1.04589	1.03472	1.03897	1.17618	1.03111	1.02382	0.97725	0.792345	1.36803	1.20211	1.11658	1.53211	1.14946	1.07642	1.07033	0.924665	1.01827	1.26143	0.894704	1.15771	1.04637	1.60236	1.12616	0.872036	1.30273	1.10796	0.756024	1.21186	1.06079	1.53856	0.765147	0.948163	1.00043	0.982357	1.01162
913	chr3	50233180	50727889	1.28151	0.700233	1.50486	1.27226	1.04529	1.2546	1.03721	0.725025	1.19118	1.00766	1.34425	0.776759	1.00923	1.20918	1.28231	1.1729	1.2863	1.26128	1.11959	1.0027	1.25607	1.42445	1.52018	1.61388	1.22285	0.830164	1.2437	1.5335	1.25537	1.37135	1.26772	1.32304	1.33052	1.22142	1.19361	1.10921	1.41103	0.829518	1.90155	0.971714	1.40966	0.693954	1.29494	1.64565	1.26453	0.893197
914	chr3	50727890	51379533	1.04775	0.877733	1.43843	1.11656	1.03666	0.702003	1.08004	1.15633	1.26902	0.811462	1.20072	0.65151	0.983826	1.22619	1.30301	0.893423	0.930266	0.849319	0.862114	0.929534	1.1794	1.00364	0.830869	1.336	1.10421	1.11391	0.89737	0.867147	0.972491	1.20093	1.29056	0.857128	0.832714	1.0284	1.00559	0.986557	1.05398	0.8563	1.52425	0.78532	2.06255	0.462842	1.31784	1.22207	0.805101	1.05649
915	chr3	51379534	51962425	1.06588	0.962344	1.10751	0.887707	0.891087	0.965391	1.08264	1.22838	1.17888	0.962216	1.47605	1.10289	0.790001	1.01543	1.36942	0.99075	1.15922	0.889685	0.921178	1.17115	1.46431	1.09903	0.81545	1.45586	1.08864	1.14527	0.907544	1.32126	1.00449	1.05123	1.08586	1.00856	1.15521	1.07025	1.06251	1.34477	0.966152	0.897768	0.976867	1.25088	2.06709	0.513253	1.29281	1.22742	0.717505	0.917836
916	chr3	51962426	52462523	1.01823	1.03757	1.18854	0.78948	1.18768	1.21624	1.27369	1.00514	1.26481	0.953444	1.49541	0.895172	1.10321	1.11566	1.29861	0.97652	0.860502	1.05346	1.18729	1.08126	1.42887	1.76098	0.883499	1.11813	0.99045	1.11861	1.01717	1.05857	1.04129	1.03822	1.05917	1.22138	1.14722	1.20854	1.13592	1.14008	1.00875	1.00142	0.951871	0.698225	1.98283	0.864726	0.746253	1.23754	0.695622	1.30358
917	chr3	52462524	52995515	0.994837	1.0038	1.02656	0.885744	0.962935	0.665525	1.14827	0.802115	1.09747	0.808561	1.05491	0.820142	0.891686	1.22249	0.99968	1.014	0.910586	0.76424	1.13211	0.91716	1.2904	1.19782	1.06454	1.00212	0.976456	1.29231	1.14887	1.0429	0.892298	0.898676	0.931246	0.893323	0.881982	1.00956	0.957788	1.01277	0.770948	0.963853	1.27257	1.14188	1.11261	0.775634	1.21549	1.53016	0.723051	0.995423
918	chr3	52995516	53575891	1.14339	1.0662	1.21462	1.14382	0.953131	0.590583	0.770231	1.13711	1.00863	0.880788	1.17542	1.12263	0.741356	1.09405	1.20584	1.21015	1.4143	1.01935	0.793242	1.22195	1.16449	1.03171	1.19018	0.969287	0.925618	0.99369	0.977083	1.08427	0.939556	0.987215	0.940745	0.871387	0.884649	1.14385	1.09267	1.15244	1.14579	1.05195	1.26854	1.2079	1.54451	0.821824	1.08935	1.1958	0.82567	1.39313
919	chr3	53575892	54093014	1.02771	1.09564	0.966338	1.05598	1.30541	0.830698	0.828268	1.02086	0.942535	0.824736	1.11292	1.19985	0.816221	1.18029	1.10254	0.871124	1.42906	1.18722	1.06126	1.08649	1.13855	1.1977	0.995778	1.16216	0.919885	1.30834	1.06232	0.763282	1.47972	1.03136	1.00321	1.21366	1.33614	1.09309	1.02962	1.31535	1.00217	0.970615	1.07259	1.09682	1.87512	0.955466	0.84291	0.944934	1.4764	1.27668
920	chr3	54093015	54649019	0.888195	1.04576	1.08295	0.818728	1.11172	0.680697	0.760301	0.804783	1.02051	0.792469	1.50413	1.0635	0.846648	1.23517	1.18316	1.04249	1.27195	0.907618	1.29393	0.885077	1.23286	1.27434	0.885905	1.20426	0.802711	1.28017	1.09065	1.14508	1.05354	0.949459	0.965831	1.35866	1.06994	1.01884	1.02875	1.0956	0.690995	0.984893	1.24207	0.859746	1.69994	0.929958	1.13137	1.22645	0.75974	1.17724
921	chr3	54649020	55169569	1.13368	1.3159	0.957932	0.829364	0.948577	1.23041	0.999563	0.991616	1.16141	0.757489	1.34523	0.706235	1.19913	1.1674	1.1682	1.16685	0.936781	1.00537	1.02473	1.48053	1.209	1.24113	1.11383	0.940211	0.885279	1.16438	1.08114	0.944439	0.98714	0.948427	0.830919	0.972528	1.00755	1.03507	0.88465	1.34422	0.526718	1.19075	1.46249	1.02999	2.0064	1.11102	1.02272	0.946075	1.20202	0.837568
922	chr3	55169570	55699552	0.952993	1.19165	0.981768	0.8818	0.964239	0.649537	0.73068	0.894649	1.04944	0.796127	1.25525	0.959248	1.12971	1.27437	0.988829	0.995519	1.19147	1.03669	0.767597	0.841052	1.06864	1.27207	1.14912	1.00101	0.940494	1.00916	1.00057	1.15161	0.824058	0.997955	1.04257	0.80766	0.796084	0.997565	1.14366	1.41274	0.805976	1.08293	1.3605	1.04549	1.37734	1.02836	0.919282	1.4762	1.12015	1.44841
923	chr3	55699553	56231169	1.09711	1.48306	0.951428	0.798843	0.992049	1.10764	0.887779	0.799591	1.30718	0.767503	1.16817	1.03375	1.08062	1.06222	0.869965	0.894959	0.835072	0.998607	0.965366	0.920097	1.20777	0.97935	1.17034	1.10073	1.24851	1.09853	1.14016	1.25088	0.899117	0.974368	1.03018	0.972446	0.988889	0.981267	1.20408	1.07774	0.997242	1.26217	1.14734	1.28887	0.851834	1.03006	1.58914	1.50411	0.790208	1.25515
924	chr3	56231170	56819544	0.969865	1.20038	1.05279	0.954799	0.966209	0.960603	0.850375	0.959634	1.17939	0.764868	1.50874	1.08404	1.03077	1.12394	1.29165	0.953236	1.62391	0.967742	0.996544	1.0987	1.39543	0.965731	1.10154	1.28438	1.10488	0.747983	1.01467	1.05202	0.994067	0.920483	0.986818	0.935915	0.973349	1.05993	0.819616	1.15358	0.993698	1.15858	1.16372	0.834516	1.17128	0.966399	1.14496	1.58245	0.7155	1.08264
925	chr3	56819545	57384562	1.00611	1.04618	1.37859	0.922342	1.03551	0.745841	0.743192	1.04112	1.47314	0.793973	1.58254	0.85257	1.18656	1.0399	1.17636	0.986596	1.48388	1.03461	0.922396	0.92351	1.10922	0.781209	0.940931	1.24009	0.8151	1.47672	0.990255	1.26775	0.884686	1.13313	0.796072	1.08992	0.539841	0.9325	0.728273	1.04705	0.760792	1.10209	1.4502	0.827063	1.43146	1.09357	0.861703	1.21482	0.91463	0.877423
926	chr3	57384563	57983851	1.04674	1.34756	1.16414	0.79111	1.01793	1.08416	0.728628	1.13052	1.15473	0.752156	1.54589	0.832505	1.3082	1.21779	0.730709	1.02895	1.6253	1.03887	0.886687	0.724151	1.36339	0.887537	0.975654	1.24862	0.987782	0.908889	0.889247	1.09585	0.932479	0.912098	0.970104	1.05622	1.11159	0.967027	0.957238	1.08191	0.867507	1.40769	1.35704	0.998968	1.2571	1.00148	1.16691	1.10403	1.28261	1.61706
927	chr3	57983852	58497711	1.14825	0.926414	0.891328	0.621197	0.86459	0.746785	0.786168	0.784461	0.905605	0.62039	1.30805	1.14055	1.13049	0.847882	1.10749	1.02133	1.28489	1.08738	1.02431	1.07434	1.26229	1.06814	1.43991	0.981102	1.05887	1.30987	1.00238	0.890493	1.10309	0.750158	0.946874	1.00662	1.06357	0.938103	0.829557	1.08951	0.965846	1.35848	0.934275	0.766994	0.820962	0.880349	1.28382	1.36507	1.19354	1.11847
928	chr3	58497712	59041179	0.81618	1.17401	1.05425	1.12855	1.17999	0.606055	0.940331	0.842548	1.06249	0.740799	1.40661	0.628402	1.11716	0.932876	0.960577	0.97583	1.42328	0.852167	1.02177	1.14352	1.09688	0.912718	1.39958	1.14971	0.750459	1.14564	1.02347	1.11908	1.05377	0.72631	0.919767	1.41422	0.888695	1.09161	0.983071	1.02893	1.12988	1.1611	1.26625	0.925955	0.337379	1.2623	0.965243	1.22488	0.96282	1.27272
929	chr3	59041180	59607994	0.968091	1.09157	0.977137	1.11593	1.15927	0.809548	0.76358	1.09611	0.878396	0.716507	1.19906	1.06988	0.99996	0.915876	0.78994	0.952301	1.63281	0.964857	1.08354	1.30809	1.3442	0.96615	1.44649	1.14171	1.08027	1.14694	1.03171	1.07933	1.05609	0.764495	1.11107	1.40037	1.21657	1.06224	0.895007	1.30145	1.24797	1.23086	1.27338	1.01814	1.51329	1.22861	1.19638	1.15941	1.07454	1.18635
930	chr3	59607995	60132560	0.932436	0.931082	1.00975	0.793501	1.13284	0.823374	1.04867	1.0712	1.04872	0.814159	1.20412	0.670583	0.98246	1.21615	1.05076	1.01082	1.65622	0.892137	0.670112	0.818363	1.25123	0.887792	0.94958	0.899745	0.845038	1.49316	0.899111	0.919384	0.908937	0.982359	1.0107	0.988428	0.536502	1.1245	1.28597	1.0233	0.61085	1.22461	1.38891	1.04998	1.27666	1.26255	1.0464	1.17849	1.08111	1.23503
931	chr3	60132561	60705843	1.06183	1.4044	1.45594	0.810724	1.34221	0.931629	0.832598	0.94687	1.4336	0.769235	1.23278	0.8606	1.20894	1.05965	1.00066	1.01068	2.11688	1.01419	0.976468	1.00859	1.2446	1.05772	1.4946	1.31918	1.21238	0.858912	1.00148	0.899284	0.920611	1.10512	1.07815	1.27231	1.01891	1.03364	0.849674	1.27753	0.771322	1.25853	1.23268	0.820616	1.39657	1.14533	1.4793	1.16899	1.0406	1.51794
932	chr3	60705844	61292345	1.14393	1.16327	1.20042	1.21689	0.9585	1.03437	0.879542	0.916032	1.13616	0.816259	1.36328	0.941185	1.00933	1.36808	1.02566	0.933006	1.81103	0.906576	1.18133	0.809889	1.43599	1.09093	0.908205	1.29422	1.06324	1.06017	1.12095	0.953564	1.05681	1.0549	1.05078	1.13938	0.638823	1.13499	0.992406	1.41081	1.1799	1.3475	1.5923	0.780608	0.816404	1.16216	1.33904	1.2805	0.990395	0.915177
933	chr3	61292346	61857481	1.14908	1.17118	0.984599	0.85467	1.21156	1.23902	0.901886	1.17554	1.03965	0.748159	1.51552	0.921371	0.885111	1.51206	1.24082	1.06896	1.75436	1.11736	0.939771	1.07361	1.22578	1.14072	0.870277	1.42487	1.07378	1.03405	1.15945	1.00908	1.01139	1.17568	1.2898	0.81864	0.8793	1.01878	1.22057	0.905549	0.793061	1.11107	1.44017	1.15613	0.991384	1.33171	1.00519	1.55068	1.09604	1.03782
934	chr3	61857482	62411970	1.06235	1.20776	1.22251	0.922679	0.829537	0.642093	0.932249	1.05864	0.972187	0.828754	1.29172	0.967872	0.928176	1.46393	1.12145	1.07689	1.97251	1.16578	0.869773	1.11483	1.31347	1.12946	1.25923	1.36424	1.0155	0.971407	1.03921	1.18799	0.967416	1.07728	1.05744	1.04608	1.09469	0.984238	1.06346	1.32355	0.98993	1.07332	1.49186	1.08492	0.80917	1.15353	1.05267	1.48881	0.941263	1.08634
935	chr3	62411971	62937024	1.17998	1.26057	1.12821	1.0275	1.2172	0.566197	0.76762	0.849009	1.02217	0.80272	1.47928	0.821849	1.13522	0.998244	0.875687	1.0217	1.54583	1.01657	0.869237	0.850996	1.20948	1.41262	1.24397	1.07466	0.971407	1.33062	1.0214	0.800233	0.975168	0.776249	0.922167	1.20793	0.918619	1.10595	1.19215	1.32874	0.767898	1.10239	1.34884	1.07153	1.24242	1.37687	0.830182	1.15565	1.17765	1.07332
936	chr3	62937025	63524511	0.923888	1.33353	1.36088	1.17169	1.18954	0.96518	0.879528	0.619427	1.13549	0.762832	1.52717	0.633726	1.1196	0.92476	1.23029	1.05124	1.6363	0.977053	0.967532	0.969628	1.19437	1.199	1.15514	1.22493	0.484265	1.27551	0.840901	0.869046	1.16383	0.914481	0.929854	1.12196	0.819312	1.13523	0.949645	1.07754	0.750297	1.06954	1.16473	1.08499	0.878229	1.5267	1.26977	1.39434	1.63636	1.05491
937	chr3	63524512	64072054	1.05947	1.12768	0.990214	0.964227	1.20701	0.875099	0.971088	1.11579	1.20334	0.812059	1.13964	1.08802	0.87786	1.16233	1.06248	1.01799	1.37374	0.967286	0.910748	1.46433	1.32229	0.951568	0.977326	1.08986	0.730136	1.08479	0.685646	1.13286	1.0395	0.845531	0.922523	1.2969	0.90471	1.01971	1.01784	1.05064	1.24182	1.1324	1.40828	1.33668	0.975476	1.37785	1.31697	1.02924	1.30784	0.756736
938	chr3	64072055	64571001	0.911004	1.1625	1.17229	1.12435	0.782417	0.869253	0.860593	0.671994	0.973932	0.739071	1.30576	0.943111	0.964472	1.22806	1.17718	1.03589	1.06594	0.943654	0.720331	1.07179	1.19961	0.731806	1.06642	1.04576	0.727498	0.912684	1.09493	0.680328	1.03092	0.756869	0.817299	0.986779	1.11269	0.950217	1.09657	1.09091	0.79014	1.16931	1.59543	1.06643	0.616826	1.33058	1.35297	0.889283	1.12637	0.907761
939	chr3	64571002	65098863	1.13408	1.03319	1.21133	0.848328	1.28197	0.882831	0.806556	0.875768	1.33041	0.747129	0.73773	1.01734	0.903121	1.38678	0.909336	1.07135	0.956017	1.04583	1.07216	1.14632	1.06497	0.841294	1.28411	0.807546	1.0555	1.29039	1.09315	0.818623	1.0254	0.966881	0.726324	1.11057	1.26376	0.880598	1.02882	1.21256	0.999375	1.16577	1.44494	1.07874	1.07754	0.801177	0.94645	1.19068	0.883998	1.0414
940	chr3	65098864	65654069	1.01583	1.09176	1.26794	1.11216	0.91431	0.842035	0.792717	1.04782	0.956871	0.959881	0.719153	1.17982	1.37231	1.13139	1.03937	1.1039	1.26074	1.06982	0.887486	0.944256	1.00876	0.834086	0.687281	0.919489	0.766588	0.968261	1.00733	0.827124	1.02499	1.04825	1.00476	1.16029	0.866079	1.0528	0.785338	1.04359	0.807122	1.19056	1.27055	0.788789	1.01117	0.671858	1.49271	0.970846	1.00974	1.17603
941	chr3	65654070	66283623	0.920695	0.919249	1.04003	1.13209	0.740262	0.976917	0.664087	0.898684	0.798173	0.859398	0.876186	0.946101	0.922053	0.866505	0.772558	1.03245	1.1071	1.09445	0.939217	0.778517	1.0712	0.989961	0.981066	0.831714	1.35508	1.00661	0.745764	0.842404	0.931127	0.828036	0.975167	0.983059	0.991575	0.997877	0.904994	1.22528	0.862846	1.23331	1.26372	1.10028	0.513048	0.569208	1.10979	0.773765	0.989861	1.18121
942	chr3	66283624	66822907	1.0425	0.956925	1.29834	0.834214	1.31089	0.683653	0.88394	1.0203	0.946499	0.884028	0.854805	1.03651	0.896295	1.03292	0.83997	1.04681	1.89821	1.01434	0.815519	0.944058	1.2309	1.01533	1.10283	0.712226	1.02495	1.20499	1.07124	0.975427	0.878978	0.788635	1.13566	0.845687	0.942955	1.08853	0.885584	1.22466	0.838917	0.951264	1.29876	0.858469	0.438705	1.15689	0.954216	0.820153	1.18651	1.0766
943	chr3	66822908	67412137	1.04306	1.07373	1.51704	0.925791	1.13143	0.966334	1.05063	1.02169	1.27393	0.943508	1.21239	0.98648	1.12893	1.13204	0.924509	1.01013	1.58461	1.22075	0.973304	1.13844	1.38322	1.04709	0.754531	0.937988	1.03082	1.02705	0.973287	0.939641	0.936269	0.97431	1.22315	1.04942	0.835143	0.981525	1.01058	1.07571	0.801318	1.2691	1.30812	1.01858	0.315191	1.17192	1.49783	1.20909	1.23128	1.70466
944	chr3	67412138	68009767	0.960397	1.25215	1.35137	1.11206	1.30488	0.873638	0.934526	1.05255	1.40642	1.0171	1.28129	1.33044	1.04277	1.14584	0.783919	1.06332	1.31588	1.29832	0.962522	1.33665	1.33843	0.913445	0.965545	0.881095	0.940888	1.17613	0.867243	0.975736	0.960801	0.85942	1.16525	1.15628	1.19683	1.00175	0.904501	1.30559	0.986963	0.91523	2.14867	1.41636	0.415809	1.23782	1.15022	1.19479	1.29798	1.18192
945	chr3	68009768	68606505	1.08812	1.29134	1.24536	0.986399	1.10096	0.760688	0.938422	1.26169	1.00391	0.910593	1.18281	1.03465	1.50032	1.14985	0.907591	1.06355	1.44067	0.880552	0.99575	0.976413	1.13567	1.23173	0.285477	0.671218	0.818946	0.891289	0.945511	1.23142	1.01091	0.882056	1.45387	0.937019	1.00036	0.961378	0.979367	1.20558	1.24119	1.15997	1.23588	1.05691	0.492239	1.17299	1.00166	1.01884	1.02464	1.71791
946	chr3	68606506	69201479	1.01601	0.931743	1.15413	1.06078	1.03746	0.817497	0.825543	1.25349	1.11584	0.824222	0.898968	0.947266	1.45111	1.33798	1.0021	0.929746	1.80182	1.08326	0.991581	1.07523	1.11875	1.0618	0.554356	0.842032	0.935784	0.947302	0.880166	1.23639	1.2243	0.640304	1.08286	1.08185	0.953604	1.10702	0.796369	1.1748	1.31089	1.2966	1.52793	1.27165	1.3061	1.06664	1.30876	0.970653	0.795884	1.45072
947	chr3	69201480	69772206	1.11775	1.15377	1.36851	0.983378	1.09677	0.944516	0.840468	0.85478	0.956797	0.999992	1.23079	1.23221	1.08825	1.17579	0.899806	1.02013	1.65523	0.777631	0.844499	1.32338	1.1908	1.18165	0.921133	0.581718	0.912958	1.25341	0.956719	0.905618	1.09107	1.09118	1.229	0.820789	0.880471	0.963299	1.02598	1.17996	1.08837	1.04712	1.37184	0.712954	1.27983	1.18573	1.36621	1.23146	1.00023	1.07742
948	chr3	69772207	70329331	1.03001	1.2013	1.384	1.12654	1.10435	0.845072	0.806156	0.861504	0.835852	0.785945	0.936445	0.915288	1.19886	1.0764	0.848243	0.887133	1.50917	1.04118	0.956427	1.02399	1.22216	1.12125	0.965073	0.871513	1.03545	0.965556	0.895963	0.79494	1.11701	0.879331	1.22337	1.00069	0.813279	0.992753	0.996761	1.1048	0.637032	1.12385	1.23213	0.964117	0.826394	1.28098	0.871267	1.07867	1.02208	1.21765
949	chr3	70329332	70939063	1.10263	1.47456	1.31107	0.915251	0.96003	0.802641	0.828942	0.668673	0.976413	0.745624	1.2007	1.07814	0.797437	1.29046	0.875844	0.986502	1.48761	0.909679	0.89498	0.774627	1.27475	0.923942	0.726472	0.824075	1.2143	0.923804	0.971387	0.783783	1.07057	1.01986	1.14862	1.06715	0.834317	0.924943	1.06222	1.28578	0.903103	0.942438	1.29007	0.924679	1.38965	1.45165	1.06217	0.986381	0.797226	1.04823
950	chr3	70939064	71470803	1.156	1.31662	1.3634	0.782568	1.3425	0.613622	0.863308	0.916165	1.05731	0.880189	1.12342	1.18036	1.10006	1.12273	0.845791	1.02748	2.04324	1.1246	1.09376	1.27269	1.06545	0.92783	0.885886	0.913442	1.17157	0.878696	1.16051	0.741184	1.0435	1.27783	1.30513	1.02014	1.01404	0.999048	0.841394	1.09658	0.984193	1.15216	1.3144	0.959242	1.29042	1.32309	0.892044	0.93076	0.955098	1.21562
951	chr3	71470804	71999770	1.15586	1.09142	1.15859	0.582036	1.11067	1.01431	0.909256	1.10561	1.10401	0.868698	1.07776	1.22874	0.987394	1.30896	0.80159	0.96914	1.33402	1.26588	1.17492	0.969062	1.19876	1.03126	0.976956	0.722834	0.638231	0.695862	0.925568	1.12272	1.18523	1.00923	1.21046	1.01286	0.68365	1.01424	0.913487	1.18482	1.2613	0.993924	1.40304	0.965375	1.74579	1.18006	1.02986	1.00024	0.854815	1.13723
952	chr3	71999771	72492845	1.06738	0.985986	1.17562	1.10789	1.03974	0.9449	0.913962	0.745499	1.38079	0.854892	0.979615	1.13337	1.3437	1.17559	0.919422	1.02411	1.53976	1.35352	1.03154	0.930213	1.31589	0.746794	0.86822	0.585341	1.05066	0.830296	0.934502	0.900158	1.13037	0.846339	1.10233	0.907166	1.45588	0.899121	1.09045	1.06002	1.31784	1.12337	1.79929	1.20191	1.40263	1.30525	0.973796	1.28807	0.868822	1.64387
953	chr3	72492846	73062120	0.99755	1.125	1.25833	0.973887	1.0675	0.864864	0.753444	1.09424	1.16722	0.926416	1.11551	1.04396	1.27352	1.36415	1.1723	1.09842	1.48202	1.05617	1.19022	0.974333	1.40161	1.02127	0.744603	0.692673	1.1588	1.13488	1.23686	1.1275	1.03246	0.891919	1.06343	0.927145	1.19129	0.989623	0.907041	1.12457	1.03462	1.10212	1.03107	1.16209	1.90718	1.35642	1.37304	1.18548	1.18824	0.900765
954	chr3	73062121	73610569	1.20036	1.1961	1.27591	0.825625	0.995559	0.897566	0.793765	1.06039	0.747292	0.968343	0.731395	1.19855	0.848739	1.12995	1.01745	1.1668	1.81328	1.21692	0.959333	0.677845	1.24416	1.06882	0.884853	0.707846	1.35085	1.43043	1.18466	1.08719	1.05295	1.01919	1.17506	1.31063	1.13055	0.89724	1.07674	1.12148	0.830315	1.31862	1.48268	0.91001	0.672486	1.54206	0.8315	1.13575	1.21545	1.1606
955	chr3	73610570	74161855	0.973396	1.35957	1.3466	1.09425	1.18524	1.03988	0.782048	0.918727	1.37832	1.18323	0.960018	0.9841	1.33685	1.17537	0.907519	0.98901	2.02159	0.978313	0.954378	1.08526	1.52116	1.17945	1.515	0.749788	0.88854	1.42109	1.11085	0.726379	1.10352	1.1567	1.14859	1.36309	0.619831	0.934944	0.925842	1.17013	0.991871	1.33632	1.27493	0.892912	0.557379	1.4688	1.14896	1.06178	1.17859	1.43295
956	chr3	74161856	74730480	1.17989	1.29889	1.49063	1.10511	0.721652	0.916656	0.911263	0.893584	1.15093	1.03576	0.925614	1.1746	1.30752	1.40024	0.860277	1.11742	1.58748	0.823075	1.2149	0.73789	1.12102	0.980891	1.28782	0.842431	0.74946	1.0897	0.83283	1.15224	1.01811	0.981557	1.15221	1.00747	0.875981	0.9693	0.950717	1.11351	0.886866	1.16801	1.52905	0.923593	1.02231	1.30066	0.773366	0.735997	1.00267	1.51351
957	chr3	74730481	75336686	1.30562	1.20728	1.34621	1.13663	1.06776	0.676395	0.860608	0.90683	1.00837	1.24178	0.663923	1.04872	1.12452	1.19843	0.94648	0.978379	1.46023	0.996905	0.929378	1.22609	1.28543	1.03492	1.10871	0.873472	1.14243	0.891263	1.0379	0.94103	0.989965	1.09979	1.43389	1.09995	1.02237	1.00309	0.885397	0.910624	1.02401	1.13552	1.17094	1.19918	0.590212	1.03438	1.04723	1.11772	1.12269	1.28854
[truncated: 4,043 more rows]
[truncated: 18 more columns]
