# Supplementary material for: Copolymerization of single-cell nucleic acids into balls of acrylamide gel
Source: Genome Res. 2020 Jan;30(1):49–61. doi: 10.1101/gr.253047.119 (PMC6961581; doi:10.1101/gr.253047.119)
Supplement: Supplemental Material [file supp_gr.253047.119_Supplemental_Data_S2.xlsx]

## Sheet: README
Supplemental Data S2 - Segmented normalized bin count data for DNA BAGs from sample cor003_5
Column name	Description
bin.number	sequence number of bin in genome order
chrom	chromosome location of the bin
bin.start	chromosome position bin start coordinate in hg19
bin.end	chromosome position bin end coordinate in hg19
11-character string consisting of ACGT indicating the BAG barcode	the segmented normalized bin count value

## Sheet: cor003_5.5k.bins.seg
bin.number	chrom	bin.start	bin.end	AAAGGGATTGG	AACTATATAAC	AACTATCGTTC	AACTATTATAG	AGAAGGGTACA	AGCTAGTGACG	AGTATTACACA	AGTGTGCGTGA	ATAGTTAATCA	ATGAATTCAGA	ATGACAGAAGA	ATGAGGAGTTA	ATGAGGATAGT	ATGAGGGTTGA	ATTCAGCTACT	ATTGACAATTG	CAACACACTTC	CAAGCAATATA	CACATAACTAG	CAGAAGGCACG	CATAGAAGTGT	CCTAGTCGAAT	CCTAGTGATCG	CTAATCTGAGT	CTCTCTACAAT	CTCTCTGAACT	CTCTCTGCAGT	GAAGGTCTAAG	GAGTTCAATAT	GGTCTAACACA	GGTCTACTATC	GGTCTAGATTA	GGTTTCACTCT	GGTTTCATTCC	GTACTAACTAG	GTCAGTAATGC	GTTTCGTCTCG	AAAGGGTCAAG	AAGCATCTAAG	AAGCATTGTGG	AAGTCAACTCT	ATCAGCGTACA	ATGACAACAAT	ATTAGTAATTG	CAAAGTTCTTA	CAGAAGTCTCG
1	chr1	1	428275	0.964158	1.07885	0.957624	1.02973	0.985703	1.17551	1.04833	1.06673	1.10329	1.0026	1.11874	1.0945	0.975505	0.979905	1.08383	1.03015	1.14031	1.16707	1.02521	1.00461	1.2203	1.15581	1.05665	1.0933	1.01319	0.997503	0.977556	0.972291	1.05317	1.12738	1.22691	1.04404	1.03355	1.06226	1.0455	1.11472	1.11394	1.07595	1.14786	1.00451	1.16451	1.06801	1.03448	0.970737	1.01939	1.14134
2	chr1	428276	620697	0.964158	1.07885	0.957624	1.02973	0.985703	1.17551	1.04833	1.06673	1.10329	1.0026	1.11874	1.0945	0.975505	0.979905	1.08383	1.03015	1.14031	1.16707	1.02521	1.00461	1.2203	1.15581	1.05665	1.0933	1.01319	0.997503	0.977556	0.972291	1.05317	1.12738	1.22691	1.04404	1.03355	1.06226	1.0455	1.11472	1.11394	1.07595	1.14786	1.00451	1.16451	1.06801	1.03448	0.970737	1.01939	1.14134
3	chr1	620698	1122128	0.964158	1.07885	0.957624	1.02973	0.985703	1.17551	1.04833	1.06673	1.10329	1.0026	1.11874	1.0945	0.975505	0.979905	1.08383	1.03015	1.14031	1.16707	1.02521	1.00461	1.2203	1.15581	1.05665	1.0933	1.01319	0.997503	0.977556	0.972291	1.05317	1.12738	1.22691	1.04404	1.03355	1.06226	1.0455	1.11472	1.11394	1.07595	1.14786	1.00451	1.16451	1.06801	1.03448	0.970737	1.01939	1.14134
4	chr1	1122129	1779256	0.964158	1.07885	0.957624	1.02973	0.985703	1.17551	1.04833	1.06673	1.10329	1.0026	1.11874	1.0945	0.975505	0.979905	1.08383	1.03015	1.14031	1.16707	1.02521	1.00461	1.2203	1.15581	1.05665	1.0933	1.01319	0.997503	0.977556	0.972291	1.05317	1.12738	1.22691	1.04404	1.03355	1.06226	1.0455	1.11472	1.11394	1.07595	1.14786	1.00451	1.16451	1.06801	1.03448	0.970737	1.01939	1.14134
5	chr1	1779257	2357606	0.964158	1.07885	0.957624	1.02973	0.985703	1.17551	1.04833	1.06673	1.10329	1.0026	1.11874	1.0945	0.975505	0.979905	1.08383	1.03015	1.14031	1.16707	1.02521	1.00461	1.2203	1.15581	1.05665	1.0933	1.01319	0.997503	0.977556	0.972291	1.05317	1.12738	1.22691	1.04404	1.03355	1.06226	1.0455	1.11472	1.11394	1.07595	1.14786	1.00451	1.16451	1.06801	1.03448	0.970737	1.01939	1.14134
6	chr1	2357607	2964887	0.964158	1.07885	0.957624	1.02973	0.985703	1.17551	1.04833	1.06673	1.10329	1.0026	1.11874	1.0945	0.975505	0.979905	1.08383	1.03015	1.14031	1.16707	1.02521	1.00461	1.2203	1.15581	1.05665	1.0933	1.01319	0.997503	0.977556	0.972291	1.05317	1.12738	1.22691	1.04404	1.03355	1.06226	1.0455	1.11472	1.11394	1.07595	1.14786	1.00451	1.16451	1.06801	1.03448	0.970737	1.01939	1.14134
7	chr1	2964888	3470030	0.964158	1.07885	0.957624	1.02973	0.985703	1.17551	1.04833	1.06673	1.10329	1.0026	1.11874	1.0945	0.975505	0.979905	1.08383	1.03015	1.14031	1.16707	1.02521	1.00461	1.2203	1.15581	1.05665	1.0933	1.01319	0.997503	0.977556	0.972291	1.05317	1.12738	1.22691	1.04404	1.03355	1.06226	1.0455	1.11472	1.11394	1.07595	1.14786	1.00451	1.16451	1.06801	1.03448	0.970737	1.01939	1.14134
8	chr1	3470031	4193611	0.964158	1.07885	0.957624	1.02973	0.985703	1.17551	0.819632	1.06673	1.10329	1.0026	1.11874	1.0945	0.975505	0.979905	1.08383	1.03015	1.14031	1.16707	1.02521	1.00461	1.2203	1.15581	1.05665	1.0933	1.01319	0.997503	0.977556	0.972291	1.05317	1.12738	1.22691	1.04404	1.03355	1.06226	1.0455	1.11472	1.11394	1.07595	1.14786	1.00451	1.16451	1.06801	1.03448	0.970737	1.01939	1.14134
9	chr1	4193612	4734431	0.964158	1.07885	0.957624	1.02973	0.985703	1.17551	0.819632	1.06673	1.10329	1.0026	1.11874	1.0945	0.975505	0.979905	1.08383	1.03015	1.14031	0.88763	1.02521	1.00461	1.2203	1.15581	1.05665	1.0933	1.01319	0.997503	0.977556	0.972291	1.05317	1.12738	1.22691	1.04404	1.03355	1.06226	1.0455	1.11472	1.11394	1.07595	1.14786	1.00451	1.16451	1.06801	1.03448	0.970737	1.01939	1.14134
10	chr1	4734432	5296313	0.964158	1.07885	0.957624	1.02973	0.985703	1.17551	0.819632	1.06673	1.10329	1.0026	1.11874	1.0945	0.975505	0.979905	1.08383	1.03015	1.14031	0.88763	1.02521	1.00461	1.2203	1.15581	1.05665	1.0933	1.01319	0.997503	0.977556	0.972291	1.05317	1.12738	1.22691	1.04404	1.03355	1.06226	1.0455	1.11472	1.11394	1.07595	1.14786	1.00451	1.16451	1.06801	1.03448	0.970737	1.01939	1.14134
11	chr1	5296314	5845062	0.964158	1.07885	0.957624	1.02973	0.985703	1.17551	0.819632	1.06673	1.10329	1.0026	1.11874	1.0945	0.975505	0.979905	1.08383	1.03015	1.14031	0.88763	1.02521	1.00461	1.2203	1.15581	1.05665	1.0933	1.01319	0.997503	0.977556	0.972291	1.05317	1.12738	1.22691	1.04404	1.03355	1.06226	1.0455	1.11472	1.11394	1.07595	1.14786	1.00451	1.16451	1.06801	1.03448	0.970737	1.01939	1.14134
12	chr1	5845063	6382868	0.964158	1.07885	0.957624	1.02973	0.985703	1.17551	0.819632	1.06673	1.10329	1.0026	1.11874	1.0945	0.975505	0.979905	0.672536	1.03015	1.14031	0.88763	1.02521	1.00461	1.2203	1.15581	1.05665	1.0933	1.01319	0.997503	0.977556	0.972291	1.05317	1.12738	0.883203	1.04404	1.03355	1.06226	1.0455	1.11472	1.11394	1.07595	1.14786	1.00451	1.16451	1.06801	1.03448	0.970737	1.01939	1.14134
13	chr1	6382869	6962366	0.964158	1.07885	0.957624	1.02973	0.985703	1.17551	0.819632	1.06673	1.10329	1.0026	1.11874	1.0945	0.975505	0.979905	0.672536	1.03015	1.14031	0.88763	1.02521	1.00461	1.2203	1.15581	1.05665	1.0933	1.01319	0.997503	0.977556	0.972291	1.05317	1.12738	0.883203	1.04404	1.03355	1.06226	1.0455	1.11472	1.11394	1.07595	1.14786	1.00451	1.16451	1.06801	1.03448	0.970737	1.01939	1.14134
14	chr1	6962367	7468721	0.964158	1.07885	0.957624	1.02973	0.985703	1.17551	0.819632	1.06673	1.10329	1.0026	1.11874	1.0945	0.975505	0.979905	0.672536	1.03015	1.14031	0.88763	1.02521	1.00461	1.2203	1.15581	1.05665	1.0933	1.01319	0.997503	0.977556	0.972291	1.05317	1.12738	0.883203	1.04404	1.03355	1.06226	1.0455	1.11472	1.11394	1.07595	1.14786	1.00451	1.16451	1.06801	1.03448	0.970737	1.01939	1.14134
15	chr1	7468722	7999687	0.964158	1.07885	0.957624	1.02973	0.985703	1.17551	0.819632	1.06673	1.10329	1.0026	1.11874	1.0945	0.975505	0.979905	0.672536	1.03015	1.14031	0.88763	1.02521	1.00461	1.2203	1.15581	1.05665	1.0933	1.01319	0.997503	0.977556	0.972291	1.05317	1.12738	0.883203	1.04404	1.03355	1.06226	1.0455	1.11472	1.11394	1.07595	1.14786	1.00451	1.16451	1.06801	1.03448	0.970737	1.01939	1.14134
16	chr1	7999688	8554982	0.964158	1.07885	0.957624	1.02973	0.985703	1.17551	0.819632	1.06673	1.10329	1.0026	1.11874	1.0945	0.975505	0.979905	0.672536	1.03015	1.14031	0.88763	1.02521	1.00461	1.2203	1.15581	1.05665	1.0933	1.01319	0.997503	0.977556	0.972291	1.05317	1.12738	0.883203	1.04404	1.03355	1.06226	1.0455	1.11472	1.11394	1.07595	1.14786	1.00451	1.16451	1.06801	1.03448	0.970737	1.01939	1.14134
17	chr1	8554983	9133954	0.964158	1.07885	0.957624	1.02973	0.985703	1.17551	0.819632	1.06673	1.10329	1.0026	1.11874	1.0945	0.975505	0.979905	0.672536	1.03015	1.14031	0.88763	1.02521	1.00461	1.2203	1.15581	1.05665	1.0933	1.01319	0.997503	0.977556	0.972291	1.05317	1.12738	0.883203	1.04404	1.03355	1.06226	1.0455	1.11472	1.11394	1.07595	1.14786	1.00451	1.16451	1.06801	1.03448	0.970737	1.01939	1.14134
18	chr1	9133955	9673433	0.964158	1.07885	0.957624	1.02973	0.985703	1.17551	0.819632	1.06673	1.10329	1.0026	1.11874	1.0945	0.975505	0.979905	0.672536	1.03015	1.14031	0.88763	1.02521	1.00461	1.2203	1.15581	1.05665	1.0933	1.01319	0.997503	0.977556	0.972291	1.05317	1.12738	1.14866	1.04404	1.03355	1.06226	1.0455	1.11472	1.11394	1.07595	1.14786	1.00451	1.16451	1.06801	1.03448	0.970737	1.01939	1.14134
19	chr1	9673434	10246190	0.964158	1.07885	0.957624	1.02973	0.985703	1.17551	0.819632	1.06673	1.10329	1.0026	1.11874	1.0945	0.975505	0.979905	0.672536	1.03015	1.14031	0.88763	1.02521	1.00461	1.2203	1.15581	1.05665	1.0933	1.01319	0.997503	0.977556	0.972291	1.05317	1.12738	1.14866	1.04404	1.03355	1.06226	1.0455	1.11472	1.11394	1.07595	1.14786	1.00451	1.16451	1.06801	1.03448	0.970737	1.01939	1.14134
20	chr1	10246191	10793949	0.964158	1.07885	0.957624	1.02973	0.985703	1.17551	0.819632	1.06673	1.10329	1.0026	1.11874	1.0945	0.975505	0.979905	0.672536	1.03015	1.14031	0.88763	1.02521	1.00461	1.2203	1.15581	1.05665	1.0933	1.01319	0.997503	0.977556	0.972291	1.05317	1.12738	1.14866	1.04404	1.03355	1.06226	1.0455	1.11472	1.11394	1.07595	1.14786	1.00451	1.16451	1.06801	1.03448	0.970737	1.01939	1.14134
21	chr1	10793950	11339541	0.964158	1.07885	0.957624	1.02973	0.985703	1.17551	0.819632	1.06673	1.10329	1.0026	1.11874	1.0945	0.975505	0.979905	0.672536	1.03015	1.14031	0.88763	1.02521	1.00461	1.2203	1.15581	1.05665	1.0933	1.01319	0.997503	0.977556	0.972291	1.05317	1.12738	1.14866	1.04404	1.03355	1.06226	1.0455	1.11472	1.11394	1.07595	1.14786	1.00451	1.16451	1.06801	1.03448	0.970737	1.01939	1.14134
22	chr1	11339542	11889564	0.964158	1.07885	0.957624	1.02973	0.985703	1.17551	0.819632	1.06673	1.10329	1.0026	1.11874	1.0945	0.975505	0.979905	0.672536	1.03015	1.14031	0.88763	1.02521	1.00461	1.2203	1.15581	1.05665	1.0933	1.01319	0.997503	0.977556	0.972291	1.05317	1.12738	1.14866	1.04404	1.03355	1.06226	1.0455	1.11472	1.11394	1.07595	1.14786	1.00451	1.16451	1.06801	1.03448	0.970737	1.01939	1.14134
23	chr1	11889565	12416188	0.964158	1.07885	0.957624	1.02973	0.985703	1.17551	0.819632	1.06673	1.10329	1.0026	1.11874	1.0945	0.975505	0.979905	0.672536	1.03015	1.14031	0.88763	1.02521	1.00461	1.2203	1.15581	1.05665	1.0933	1.01319	0.997503	0.977556	0.972291	1.05317	1.12738	1.14866	1.04404	1.03355	1.06226	1.0455	1.11472	1.11394	1.07595	1.14786	1.00451	1.16451	1.06801	1.03448	0.970737	1.01939	1.14134
24	chr1	12416189	12936486	0.964158	1.07885	0.957624	1.02973	0.985703	1.17551	0.819632	1.06673	1.10329	1.0026	1.11874	1.0945	0.975505	0.979905	0.672536	1.03015	1.14031	0.88763	1.02521	1.00461	1.2203	1.15581	1.05665	1.0933	1.01319	0.997503	0.977556	0.972291	1.05317	1.12738	1.14866	1.04404	1.03355	1.06226	1.0455	1.11472	1.11394	1.07595	1.14786	1.00451	1.16451	1.06801	1.03448	0.970737	1.01939	1.14134
25	chr1	12936487	13636282	0.964158	1.07885	0.957624	1.02973	0.985703	1.17551	0.819632	1.06673	1.10329	1.0026	1.11874	1.0945	0.975505	0.979905	0.672536	1.03015	1.14031	0.88763	1.02521	1.00461	1.2203	1.15581	1.05665	1.0933	1.01319	0.997503	0.977556	0.972291	1.05317	1.12738	1.14866	1.04404	1.03355	1.06226	1.0455	1.11472	1.11394	1.07595	1.14786	1.00451	1.16451	1.06801	1.03448	0.970737	1.01939	1.14134
26	chr1	13636283	14233689	0.964158	1.07885	0.957624	1.02973	0.985703	1.17551	0.819632	1.06673	1.10329	1.0026	1.11874	1.0945	0.975505	0.979905	0.672536	1.03015	1.14031	0.88763	1.02521	1.00461	1.2203	1.15581	1.05665	1.0933	1.01319	0.997503	0.977556	0.972291	1.05317	1.12738	1.14866	1.04404	1.03355	1.06226	1.0455	1.11472	1.11394	1.07595	1.14786	1.00451	1.16451	0.787021	1.03448	0.970737	1.01939	1.14134
27	chr1	14233690	14779206	0.964158	1.07885	0.957624	1.02973	0.985703	1.17551	0.819632	1.06673	1.10329	1.0026	1.11874	1.0945	0.975505	0.979905	0.672536	1.03015	1.14031	0.88763	1.02521	1.00461	1.2203	1.15581	1.05665	1.0933	1.01319	0.997503	0.977556	0.972291	1.05317	1.12738	1.14866	1.04404	1.03355	1.06226	1.0455	1.11472	1.11394	1.07595	1.14786	1.00451	1.16451	0.787021	1.03448	0.970737	1.01939	1.14134
28	chr1	14779207	15303889	0.964158	1.07885	0.957624	1.02973	0.985703	1.17551	0.819632	1.06673	1.10329	1.0026	1.11874	1.0945	0.975505	0.979905	0.672536	1.03015	1.14031	0.88763	1.02521	1.00461	1.2203	1.15581	1.05665	1.0933	1.01319	0.997503	0.977556	0.972291	1.05317	1.12738	1.14866	1.04404	1.03355	1.06226	1.0455	1.11472	1.11394	1.07595	1.14786	1.00451	0.877832	0.787021	1.03448	0.970737	1.01939	1.14134
29	chr1	15303890	15826550	0.964158	1.07885	0.957624	1.02973	0.985703	1.17551	0.819632	1.06673	1.10329	1.0026	1.11874	1.0945	0.975505	0.979905	0.672536	1.03015	1.14031	0.88763	1.02521	1.00461	1.2203	1.15581	1.05665	1.0933	1.01319	0.997503	0.977556	0.972291	1.05317	1.12738	1.14866	1.04404	1.03355	1.06226	1.0455	1.11472	1.11394	1.07595	1.14786	1.00451	0.877832	0.787021	1.03448	0.970737	1.01939	1.14134
30	chr1	15826551	16392039	0.964158	1.07885	0.957624	1.02973	0.985703	1.17551	0.819632	1.06673	1.10329	1.0026	1.11874	1.0945	0.975505	0.979905	0.672536	1.03015	1.14031	0.88763	1.02521	1.00461	1.2203	1.15581	1.05665	1.0933	1.01319	0.997503	0.977556	0.972291	1.05317	1.12738	1.14866	1.04404	1.03355	1.06226	1.0455	1.11472	1.11394	1.07595	1.14786	1.00451	0.877832	0.787021	1.03448	0.970737	1.01939	1.14134
31	chr1	16392040	16891016	0.964158	1.07885	0.957624	1.02973	0.985703	1.17551	1.05274	1.06673	1.10329	1.0026	1.11874	1.0945	0.975505	0.979905	0.672536	1.03015	1.14031	0.88763	1.02521	1.00461	1.2203	1.15581	1.05665	1.0933	1.01319	0.997503	0.977556	0.972291	1.05317	1.12738	1.14866	1.04404	1.03355	1.06226	1.0455	1.11472	1.11394	1.07595	1.14786	1.00451	0.877832	0.787021	1.03448	0.970737	1.01939	1.14134
32	chr1	16891017	17095187	0.964158	1.07885	0.957624	1.02973	0.985703	1.17551	1.05274	1.06673	1.10329	1.0026	1.11874	1.0945	0.975505	0.979905	1.18673	1.03015	1.14031	0.88763	1.02521	1.00461	1.2203	1.15581	1.05665	1.0933	1.01319	0.997503	0.977556	0.972291	1.05317	1.12738	1.14866	1.04404	1.03355	1.06226	1.0455	1.11472	1.11394	1.07595	1.14786	1.00451	0.877832	0.787021	1.03448	0.970737	1.01939	1.14134
33	chr1	17095188	17565229	0.964158	1.07885	0.957624	1.02973	0.985703	1.17551	1.05274	1.06673	1.10329	1.0026	1.11874	1.0945	0.975505	0.979905	1.18673	1.03015	1.14031	0.88763	1.02521	1.00461	1.2203	1.15581	1.05665	1.0933	1.01319	0.997503	0.977556	0.972291	1.05317	1.12738	1.14866	1.04404	1.03355	1.06226	1.0455	1.11472	1.11394	1.07595	1.14786	1.00451	0.877832	0.787021	1.03448	0.970737	1.01939	1.14134
34	chr1	17565230	18083485	0.964158	1.07885	0.957624	1.02973	0.985703	1.17551	1.05274	1.06673	1.10329	1.0026	1.11874	1.0945	0.975505	0.979905	1.18673	1.03015	1.14031	0.88763	1.02521	1.00461	1.2203	1.15581	1.05665	1.0933	1.01319	0.997503	0.977556	0.972291	1.05317	1.12738	1.14866	1.04404	1.03355	1.06226	1.0455	1.11472	1.11394	1.07595	1.14786	1.00451	0.877832	0.787021	1.03448	0.970737	1.01939	1.14134
35	chr1	18083486	18587701	0.964158	1.07885	0.957624	1.02973	0.985703	1.17551	1.05274	1.06673	1.10329	1.0026	1.11874	1.0945	0.975505	0.979905	1.18673	1.03015	1.14031	0.88763	1.02521	1.00461	1.2203	1.15581	1.05665	1.0933	1.01319	0.997503	0.977556	0.972291	1.05317	1.12738	1.14866	1.04404	1.03355	1.06226	1.0455	1.11472	1.11394	1.07595	1.14786	1.00451	0.877832	0.787021	1.03448	0.970737	1.01939	1.14134
36	chr1	18587702	19113519	0.964158	1.07885	0.957624	1.02973	0.985703	1.17551	1.05274	1.06673	1.10329	1.0026	1.11874	1.0945	0.975505	0.979905	1.18673	1.03015	1.14031	0.88763	1.02521	1.00461	1.2203	1.15581	1.05665	1.0933	1.01319	0.997503	0.977556	0.972291	1.05317	1.12738	1.14866	1.04404	1.03355	1.06226	1.0455	1.11472	1.11394	1.07595	1.14786	1.00451	0.877832	0.787021	1.03448	0.970737	1.01939	1.14134
37	chr1	19113520	19594848	0.964158	1.07885	0.957624	1.02973	0.985703	1.17551	1.05274	1.06673	1.10329	1.0026	1.11874	1.0945	0.975505	0.979905	0.562761	1.03015	1.14031	0.88763	1.02521	1.00461	1.2203	1.15581	1.05665	1.0933	1.01319	0.997503	0.977556	0.972291	1.05317	1.12738	1.14866	1.04404	1.03355	1.06226	1.0455	1.11472	1.11394	1.07595	1.14786	1.00451	0.877832	0.787021	1.03448	0.970737	1.01939	1.14134
38	chr1	19594849	20112230	0.964158	1.07885	0.957624	1.02973	0.985703	1.17551	0.527767	1.06673	1.10329	1.0026	1.11874	1.0945	0.975505	0.979905	0.562761	1.03015	1.14031	0.88763	1.02521	1.00461	1.2203	1.15581	1.05665	1.0933	1.01319	0.997503	0.977556	0.972291	1.05317	1.12738	1.14866	1.04404	1.03355	1.06226	1.0455	1.11472	1.11394	1.07595	1.14786	1.00451	0.877832	0.787021	1.03448	0.970737	1.01939	1.14134
39	chr1	20112231	20626778	0.964158	1.07885	0.957624	1.02973	0.985703	1.17551	0.527767	1.06673	1.10329	1.0026	1.11874	1.0945	0.975505	0.979905	0.562761	1.03015	1.14031	0.88763	1.02521	1.00461	1.2203	1.15581	1.05665	1.0933	1.01319	0.997503	0.977556	0.972291	1.05317	1.12738	1.14866	1.04404	1.03355	1.06226	1.0455	1.11472	1.11394	1.07595	1.14786	1.00451	0.877832	0.787021	1.03448	0.970737	1.01939	1.14134
40	chr1	20626779	21153878	0.964158	1.07885	0.957624	1.02973	0.985703	1.17551	0.527767	1.06673	1.10329	1.0026	1.11874	1.0945	0.975505	0.979905	0.562761	1.03015	1.14031	0.88763	1.02521	1.00461	1.2203	1.15581	1.05665	1.0933	1.01319	0.997503	0.977556	0.972291	1.05317	1.12738	1.14866	1.04404	1.03355	1.06226	1.0455	1.11472	1.11394	1.07595	1.14786	1.00451	0.877832	1.04362	1.03448	0.970737	1.01939	1.14134
41	chr1	21153879	21724878	0.964158	1.07885	0.957624	1.02973	0.985703	1.17551	0.527767	1.06673	1.10329	1.0026	1.11874	1.0945	0.975505	0.979905	0.562761	1.03015	1.14031	0.88763	1.02521	1.00461	1.2203	1.15581	1.05665	1.0933	1.01319	0.997503	0.977556	0.972291	1.05317	1.12738	1.14866	1.04404	1.03355	1.06226	1.0455	1.11472	1.11394	1.07595	1.14786	1.00451	0.877832	1.04362	1.03448	0.970737	1.01939	0.616005
42	chr1	21724879	22253016	0.964158	1.07885	0.957624	1.02973	0.985703	1.17551	0.954755	1.06673	1.10329	1.0026	1.11874	1.0945	0.975505	0.979905	0.562761	1.03015	1.14031	0.88763	1.02521	1.00461	1.2203	1.15581	1.05665	1.0933	1.01319	0.997503	0.977556	0.972291	1.05317	1.12738	1.14866	1.04404	1.03355	1.06226	1.0455	1.11472	1.11394	1.07595	1.14786	1.00451	0.877832	1.04362	1.03448	0.970737	1.01939	0.616005
43	chr1	22253017	22782741	0.964158	1.07885	0.957624	1.02973	0.985703	1.17551	0.954755	1.06673	1.10329	1.0026	1.11874	1.0945	0.975505	0.979905	0.562761	1.03015	1.14031	0.88763	1.02521	1.00461	1.2203	1.15581	1.05665	1.0933	1.01319	0.997503	0.977556	0.972291	1.05317	1.12738	1.14866	1.04404	1.03355	1.06226	1.0455	1.11472	1.11394	1.07595	1.14786	1.00451	0.877832	1.04362	1.03448	0.970737	1.01939	0.616005
44	chr1	22782742	23305764	0.964158	1.07885	0.957624	1.02973	0.985703	1.17551	0.954755	1.06673	1.10329	1.0026	1.11874	1.0945	0.975505	0.979905	0.562761	1.03015	1.14031	0.88763	1.02521	1.00461	1.2203	1.15581	1.05665	1.0933	1.01319	0.997503	0.977556	0.972291	1.05317	1.12738	1.14866	1.04404	1.03355	1.06226	1.0455	1.11472	1.11394	1.07595	1.14786	1.00451	0.877832	1.04362	1.03448	0.970737	1.01939	1.0406
45	chr1	23305765	23866999	0.964158	1.07885	0.957624	1.02973	0.985703	1.17551	0.954755	1.06673	1.10329	1.0026	1.11874	1.0945	0.975505	0.979905	0.562761	1.03015	1.14031	0.88763	1.02521	1.00461	1.2203	1.15581	1.05665	1.0933	1.01319	0.997503	0.977556	0.972291	1.05317	1.12738	1.14866	1.04404	1.03355	1.06226	1.0455	1.11472	1.11394	1.07595	1.14786	1.00451	0.877832	1.04362	1.03448	0.970737	1.01939	1.0406
46	chr1	23867000	24468012	0.964158	1.07885	0.957624	1.02973	0.985703	1.17551	0.954755	1.06673	1.10329	1.0026	1.11874	1.0945	0.975505	0.979905	0.562761	1.03015	1.14031	0.88763	1.02521	1.00461	1.2203	1.15581	1.05665	1.0933	1.01319	0.997503	0.977556	0.972291	1.05317	1.12738	1.14866	1.04404	1.03355	1.06226	1.0455	1.11472	1.11394	1.07595	1.14786	1.00451	0.877832	1.04362	1.03448	0.970737	1.01939	1.0406
47	chr1	24468013	24984290	0.964158	1.07885	0.957624	1.02973	0.985703	1.17551	0.954755	1.06673	1.10329	1.0026	1.11874	1.0945	0.975505	0.979905	0.562761	1.03015	1.14031	0.88763	1.02521	1.00461	1.2203	1.15581	1.05665	1.0933	1.01319	0.997503	0.977556	0.972291	1.05317	1.12738	1.14866	1.04404	1.03355	1.06226	1.0455	1.11472	1.11394	1.07595	1.14786	1.00451	0.877832	1.04362	1.03448	0.970737	1.01939	1.0406
48	chr1	24984291	25535135	0.964158	1.07885	0.957624	1.02973	0.985703	1.17551	0.954755	1.06673	1.10329	1.0026	1.11874	1.0945	0.975505	0.979905	0.562761	1.03015	1.14031	0.88763	1.02521	1.00461	1.2203	1.15581	1.05665	1.0933	1.01319	0.997503	0.977556	0.972291	1.05317	1.12738	1.14866	1.04404	1.03355	1.06226	1.0455	1.11472	1.11394	1.07595	1.14786	1.00451	0.877832	0.788834	1.03448	0.970737	1.01939	1.0406
49	chr1	25535136	26072297	0.964158	1.07885	0.957624	1.02973	0.985703	1.17551	0.954755	1.06673	1.10329	1.0026	1.11874	1.0945	0.975505	0.979905	0.562761	1.03015	1.14031	0.88763	1.02521	1.00461	1.2203	1.15581	1.05665	1.0933	1.01319	0.997503	0.977556	0.972291	1.05317	1.12738	1.14866	1.04404	1.03355	1.06226	1.0455	1.11472	1.11394	1.07595	1.14786	1.00451	0.877832	0.788834	1.03448	0.970737	1.01939	1.0406
50	chr1	26072298	26616722	0.964158	1.07885	0.957624	1.02973	0.985703	1.17551	0.954755	0.605077	1.10329	1.0026	1.11874	1.0945	0.975505	0.979905	0.562761	1.03015	1.14031	0.88763	1.02521	1.00461	1.2203	1.15581	1.05665	1.0933	1.01319	0.997503	0.977556	0.972291	1.05317	1.12738	1.14866	1.04404	1.03355	1.06226	1.0455	1.11472	1.11394	1.07595	1.14786	1.00451	0.877832	0.788834	1.03448	0.970737	1.01939	1.0406
51	chr1	26616723	27190656	0.964158	1.07885	0.957624	1.02973	0.985703	1.17551	0.954755	0.605077	1.10329	1.0026	1.11874	1.0945	0.975505	0.979905	0.562761	1.03015	1.14031	0.88763	1.02521	1.00461	1.2203	1.15581	1.05665	1.0933	1.01319	0.997503	0.977556	0.972291	1.05317	1.12738	1.14866	1.04404	1.03355	1.06226	1.0455	1.11472	1.11394	1.07595	1.14786	1.00451	0.877832	0.788834	1.03448	0.970737	1.01939	1.0406
52	chr1	27190657	27754800	0.964158	1.07885	0.957624	1.02973	0.985703	1.17551	0.954755	0.605077	1.10329	1.0026	1.11874	1.0945	0.975505	0.979905	0.562761	1.03015	1.14031	0.88763	1.02521	1.00461	1.2203	1.15581	1.05665	1.0933	1.01319	0.997503	0.977556	0.972291	1.05317	1.12738	1.14866	1.04404	1.03355	1.06226	1.0455	1.11472	1.11394	1.07595	1.14786	1.00451	0.877832	0.788834	1.03448	0.970737	1.01939	1.0406
53	chr1	27754801	28337819	0.964158	1.07885	0.957624	1.02973	0.985703	1.17551	0.954755	0.605077	1.10329	1.0026	1.11874	1.0945	0.975505	0.979905	0.562761	1.03015	1.14031	0.88763	1.02521	1.00461	1.2203	1.15581	1.05665	1.0933	1.01319	0.997503	0.977556	0.972291	1.05317	1.12738	1.14866	1.04404	1.03355	1.06226	1.0455	1.11472	1.11394	1.07595	1.14786	1.00451	0.877832	0.788834	1.03448	0.970737	1.01939	1.0406
54	chr1	28337820	28925275	0.964158	1.07885	0.957624	1.02973	0.985703	1.17551	0.954755	0.605077	1.10329	1.0026	1.11874	1.0945	0.975505	0.979905	0.562761	1.03015	1.14031	0.88763	1.02521	1.00461	1.2203	1.15581	1.05665	1.0933	1.01319	0.997503	0.977556	0.972291	1.05317	1.12738	1.14866	1.04404	1.03355	1.06226	1.0455	1.11472	1.11394	1.07595	1.14786	1.00451	0.877832	0.788834	1.03448	0.970737	1.01939	1.0406
55	chr1	28925276	29525195	0.964158	1.07885	0.957624	1.02973	0.985703	1.17551	0.954755	1.10572	1.10329	1.0026	1.11874	1.0945	0.975505	0.979905	0.562761	1.03015	1.14031	0.88763	1.02521	1.00461	1.2203	1.15581	1.05665	1.0933	1.01319	0.997503	0.977556	0.972291	1.05317	1.12738	1.14866	1.04404	1.03355	1.06226	1.0455	1.11472	1.11394	1.07595	1.14786	1.00451	0.877832	0.788834	1.03448	0.970737	1.01939	1.0406
56	chr1	29525196	30186066	0.964158	1.07885	0.957624	1.02973	0.985703	1.17551	0.954755	1.10572	1.10329	1.0026	1.11874	1.0945	0.975505	0.979905	0.562761	1.03015	1.14031	0.88763	1.02521	1.00461	1.2203	1.15581	1.05665	1.0933	1.01319	0.997503	0.977556	0.972291	1.05317	1.12738	1.14866	1.04404	1.03355	1.06226	1.0455	1.11472	1.11394	1.07595	1.14786	1.00451	0.877832	0.788834	1.03448	0.970737	1.01939	1.0406
57	chr1	30186067	30712617	0.964158	1.07885	0.957624	1.02973	0.985703	1.17551	0.954755	1.10572	1.10329	1.0026	1.11874	1.0945	0.975505	0.979905	0.562761	1.03015	1.14031	0.88763	1.02521	1.00461	1.2203	1.15581	1.05665	1.0933	1.01319	0.997503	0.977556	0.972291	1.05317	1.12738	1.14866	1.04404	1.03355	1.06226	1.0455	1.11472	1.11394	1.07595	1.14786	1.00451	0.877832	0.788834	1.03448	0.970737	1.01939	1.0406
58	chr1	30712618	31230675	0.964158	1.07885	0.957624	1.02973	0.985703	1.17551	0.954755	1.10572	1.10329	1.0026	1.11874	1.0945	0.975505	0.979905	0.562761	1.03015	1.14031	0.88763	1.02521	1.00461	1.2203	1.15581	1.05665	1.0933	1.01319	0.997503	0.977556	0.972291	1.05317	1.12738	1.14866	1.04404	1.03355	1.06226	1.0455	1.11472	1.11394	1.07595	1.14786	1.00451	0.877832	0.788834	1.03448	0.970737	1.01939	1.0406
59	chr1	31230676	31776539	0.964158	1.07885	0.957624	1.02973	0.985703	1.17551	0.954755	1.10572	1.10329	1.0026	1.11874	1.0945	0.975505	0.979905	0.562761	1.03015	1.14031	0.88763	1.02521	1.00461	1.2203	1.15581	1.05665	1.0933	1.01319	0.997503	0.977556	0.972291	1.05317	1.12738	1.14866	1.04404	1.03355	1.06226	0.832685	1.11472	1.11394	1.07595	1.14786	1.00451	0.877832	0.788834	1.03448	0.970737	1.01939	1.0406
60	chr1	31776540	32278682	0.964158	1.07885	0.957624	1.02973	0.985703	1.17551	0.954755	1.10572	1.10329	1.0026	1.11874	1.0945	0.975505	0.979905	0.562761	1.03015	1.14031	0.88763	1.02521	1.00461	1.2203	1.15581	1.05665	1.0933	1.01319	0.997503	0.977556	0.972291	1.05317	1.12738	1.14866	1.04404	1.03355	1.06226	0.832685	1.11472	1.11394	1.07595	1.14786	1.00451	0.877832	0.788834	1.03448	0.970737	1.01939	1.0406
61	chr1	32278683	32824485	0.964158	1.07885	0.957624	1.02973	0.985703	1.17551	0.954755	1.10572	1.10329	1.0026	1.11874	1.0945	0.975505	0.979905	0.562761	1.03015	1.14031	0.88763	1.02521	1.00461	1.2203	1.15581	1.05665	1.0933	1.01319	0.997503	0.977556	0.972291	1.05317	1.12738	1.14866	1.04404	1.03355	1.06226	0.832685	1.11472	1.11394	1.07595	1.14786	1.00451	0.877832	0.788834	1.03448	0.970737	1.01939	1.0406
62	chr1	32824486	33411502	0.964158	1.07885	0.957624	1.02973	0.985703	1.17551	0.954755	1.10572	1.10329	1.0026	1.11874	1.0945	0.975505	0.979905	0.562761	1.03015	1.14031	0.88763	1.02521	1.00461	1.2203	1.15581	1.05665	1.0933	1.01319	0.997503	0.977556	0.972291	1.05317	1.12738	1.14866	1.04404	1.03355	1.06226	0.832685	1.11472	1.11394	1.07595	1.14786	1.00451	0.877832	0.788834	1.03448	0.970737	1.01939	1.0406
63	chr1	33411503	33958687	0.964158	1.07885	0.957624	1.02973	0.985703	1.17551	0.954755	1.10572	1.10329	1.0026	1.11874	1.0945	0.975505	0.979905	0.562761	1.03015	1.14031	0.88763	1.02521	1.00461	1.2203	1.15581	1.05665	1.0933	1.01319	0.997503	0.977556	0.972291	1.05317	1.12738	1.14866	1.04404	1.03355	1.06226	0.832685	1.11472	1.11394	1.07595	1.14786	1.00451	0.877832	0.788834	1.03448	0.970737	1.01939	1.0406
64	chr1	33958688	34452171	0.964158	1.07885	0.957624	1.02973	0.985703	1.17551	0.954755	1.10572	1.10329	1.0026	1.11874	1.0945	0.975505	0.979905	0.562761	1.03015	1.14031	0.88763	1.02521	1.00461	1.2203	1.15581	1.05665	1.0933	1.01319	0.997503	0.977556	0.972291	1.05317	1.12738	1.14866	1.04404	1.03355	1.06226	0.832685	1.11472	1.11394	1.07595	1.14786	1.00451	0.877832	0.788834	1.03448	0.970737	1.01939	1.0406
65	chr1	34452172	34989422	0.964158	1.07885	0.957624	1.02973	0.985703	1.17551	0.954755	1.10572	1.10329	1.0026	1.11874	1.0945	0.975505	0.979905	0.562761	1.03015	1.14031	0.88763	1.02521	1.00461	1.2203	1.15581	1.05665	1.0933	1.01319	0.997503	0.977556	0.972291	1.05317	1.12738	1.14866	1.04404	1.03355	1.06226	0.832685	1.11472	1.11394	1.07595	1.14786	1.00451	0.877832	0.788834	1.03448	0.970737	1.01939	1.0406
66	chr1	34989423	35549642	0.964158	1.07885	0.957624	1.02973	0.985703	1.17551	0.954755	1.10572	1.10329	1.0026	1.11874	1.0945	0.975505	0.979905	0.562761	1.03015	1.14031	0.88763	1.02521	1.00461	1.2203	1.15581	1.05665	1.0933	1.01319	0.997503	0.977556	0.972291	1.05317	1.12738	1.14866	1.04404	1.03355	1.06226	0.832685	1.11472	1.11394	1.07595	1.14786	1.00451	0.877832	0.788834	1.03448	0.970737	1.01939	1.0406
67	chr1	35549643	36138499	0.964158	1.07885	0.957624	1.02973	0.985703	1.17551	0.700403	1.10572	1.10329	1.0026	1.11874	1.0945	0.975505	0.979905	0.562761	1.03015	1.14031	0.88763	1.02521	1.00461	1.2203	1.15581	1.05665	1.0933	1.01319	0.997503	0.977556	0.972291	1.05317	1.12738	1.14866	1.04404	1.03355	1.06226	0.832685	1.11472	1.11394	1.07595	1.14786	1.00451	0.877832	0.788834	1.03448	0.970737	1.01939	1.0406
68	chr1	36138500	36727231	0.964158	1.07885	0.957624	1.02973	0.985703	1.17551	0.700403	1.10572	1.10329	1.0026	1.11874	1.0945	0.975505	0.979905	0.562761	1.03015	1.14031	0.88763	1.02521	1.00461	1.2203	1.15581	1.05665	1.0933	1.01319	0.997503	0.977556	0.972291	1.05317	1.12738	1.14866	1.04404	1.03355	1.06226	0.832685	1.11472	1.11394	1.07595	1.14786	1.00451	0.877832	0.788834	1.03448	0.970737	1.01939	1.0406
69	chr1	36727232	37235739	0.964158	1.07885	0.957624	1.02973	0.985703	1.17551	0.700403	1.10572	1.10329	1.0026	1.11874	1.0945	0.975505	0.979905	0.562761	1.03015	1.14031	0.88763	1.02521	1.00461	1.2203	1.15581	1.05665	1.0933	1.01319	0.997503	0.977556	0.972291	1.05317	1.12738	1.14866	1.04404	1.03355	1.06226	0.994515	1.11472	1.11394	1.07595	1.14786	1.00451	0.877832	0.788834	1.03448	0.970737	1.01939	1.0406
70	chr1	37235740	37748931	0.964158	1.07885	0.957624	1.02973	0.985703	1.17551	0.700403	1.10572	1.10329	1.0026	1.11874	1.0945	0.975505	0.979905	0.695308	1.03015	1.14031	0.88763	1.02521	1.00461	1.2203	1.15581	1.05665	1.0933	1.01319	0.997503	0.977556	0.972291	1.05317	1.12738	1.14866	1.04404	1.03355	1.06226	0.994515	1.11472	1.11394	1.07595	1.14786	1.00451	0.877832	0.788834	1.03448	0.970737	1.01939	1.0406
71	chr1	37748932	38289538	0.964158	1.07885	0.957624	1.02973	0.985703	1.17551	0.700403	1.10572	1.10329	1.0026	1.11874	1.0945	0.975505	0.979905	0.695308	1.03015	1.14031	0.88763	1.02521	1.00461	1.2203	1.15581	1.05665	1.0933	1.01319	0.997503	0.977556	0.972291	1.05317	1.12738	1.14866	1.04404	1.03355	1.06226	0.994515	1.11472	1.11394	1.07595	1.14786	1.00451	0.877832	0.788834	1.03448	0.970737	1.01939	1.0406
72	chr1	38289539	38829953	0.964158	1.07885	0.957624	1.02973	0.985703	1.17551	0.700403	1.10572	1.10329	1.0026	1.11874	1.0945	0.975505	0.979905	0.695308	1.03015	1.14031	0.88763	1.02521	1.00461	1.2203	1.15581	1.05665	1.0933	1.01319	0.997503	0.977556	0.972291	1.05317	1.12738	1.14866	1.04404	1.03355	1.06226	0.994515	1.11472	1.11394	1.07595	1.14786	1.00451	0.877832	0.788834	1.03448	0.970737	1.01939	1.0406
73	chr1	38829954	39368644	0.964158	1.07885	0.957624	1.02973	0.985703	1.17551	0.700403	1.10572	0.842063	1.0026	1.11874	1.0945	0.975505	0.979905	0.695308	1.03015	1.14031	0.88763	1.02521	1.00461	1.2203	1.15581	1.05665	1.0933	1.01319	0.997503	0.977556	0.972291	1.05317	1.12738	1.14866	1.04404	1.03355	1.06226	0.994515	1.11472	1.11394	1.07595	1.14786	1.00451	0.877832	0.788834	1.03448	0.970737	1.01939	1.0406
74	chr1	39368645	39955961	0.964158	1.07885	0.957624	1.02973	0.985703	1.17551	0.700403	1.10572	0.842063	1.0026	1.11874	1.0945	0.975505	0.979905	0.695308	1.03015	1.14031	0.88763	1.02521	1.00461	1.2203	1.15581	1.05665	1.0933	1.01319	0.997503	0.977556	0.972291	1.05317	1.12738	1.14866	1.04404	1.03355	1.06226	0.994515	1.11472	1.11394	1.07595	1.14786	1.00451	0.877832	0.788834	1.03448	0.970737	1.01939	1.0406
75	chr1	39955962	40517524	0.964158	1.07885	0.957624	1.02973	0.985703	1.17551	0.700403	1.10572	0.842063	1.0026	1.11874	1.0945	0.975505	0.979905	0.695308	1.03015	1.14031	0.88763	1.02521	1.00461	1.2203	1.15581	1.05665	1.0933	1.01319	0.997503	0.977556	0.972291	1.05317	1.12738	1.14866	1.04404	1.03355	1.06226	0.994515	1.11472	1.11394	1.07595	1.14786	1.00451	0.877832	0.788834	1.03448	0.970737	1.01939	1.0406
76	chr1	40517525	41094253	0.964158	1.07885	0.957624	1.02973	0.985703	1.17551	0.700403	1.10572	0.842063	1.0026	1.11874	1.0945	0.975505	0.979905	0.695308	1.03015	1.14031	0.88763	1.02521	1.00461	1.2203	1.15581	1.05665	1.0933	1.01319	0.997503	0.977556	0.972291	1.05317	1.12738	1.14866	1.04404	1.03355	1.06226	0.994515	1.11472	1.11394	1.07595	1.14786	1.00451	0.877832	0.788834	1.03448	0.970737	1.01939	1.0406
77	chr1	41094254	41646374	0.964158	1.07885	0.957624	1.02973	0.985703	1.17551	0.700403	1.10572	0.842063	1.0026	1.11874	1.0945	0.975505	0.979905	0.695308	1.03015	1.14031	0.88763	1.02521	1.00461	1.2203	1.15581	1.05665	1.0933	1.01319	0.997503	0.977556	0.972291	1.05317	1.12738	1.14866	1.04404	1.03355	1.06226	0.994515	1.11472	1.11394	1.07595	1.14786	1.00451	0.877832	0.788834	1.03448	0.970737	1.01939	1.0406
78	chr1	41646375	42165436	0.964158	1.07885	0.957624	1.02973	0.985703	1.17551	0.700403	1.10572	0.842063	1.0026	1.11874	1.0945	0.975505	0.979905	0.695308	1.03015	1.14031	0.88763	1.02521	1.00461	1.2203	1.15581	1.05665	1.0933	1.01319	0.997503	0.977556	0.972291	1.05317	1.12738	1.14866	1.04404	1.03355	1.06226	0.994515	1.11472	1.11394	1.07595	1.14786	1.00451	0.877832	0.788834	1.03448	0.970737	1.01939	1.0406
79	chr1	42165437	42694462	0.964158	0.442949	0.957624	1.02973	0.519546	1.17551	0.700403	1.10572	0.842063	1.0026	1.11874	1.0945	0.975505	0.979905	0.695308	1.03015	1.14031	0.88763	1.02521	1.00461	1.2203	1.15581	1.05665	1.0933	1.01319	0.997503	0.977556	0.972291	1.05317	1.12738	1.14866	1.04404	1.03355	1.06226	0.994515	1.11472	1.11394	1.07595	1.14786	1.00451	0.877832	0.348158	1.03448	0.970737	1.01939	1.0406
80	chr1	42694463	43249010	0.48612	0.442949	0.456485	1.02973	0.519546	0.778178	0.360235	0.574934	0.842063	0.566204	0.550405	0.591023	0.975505	0.493023	0.695308	0.578278	0.649859	0.460934	1.02521	1.00461	0.558333	1.15581	0.620394	0.680995	1.01319	0.997503	0.510125	0.972291	0.524925	1.12738	0.595234	1.04404	1.03355	0.519079	0.505453	0.457856	1.11394	0.559507	0.597023	1.00451	0.877832	0.348158	1.03448	0.970737	1.01939	0.565695
81	chr1	43249011	43794406	0.48612	0.442949	0.456485	1.02973	0.519546	0.778178	0.360235	0.574934	0.842063	0.566204	0.550405	0.591023	0.975505	0.493023	0.695308	0.578278	0.649859	0.460934	1.02521	1.00461	0.558333	1.15581	0.620394	0.680995	1.01319	0.997503	0.510125	0.972291	0.524925	1.12738	0.595234	1.04404	1.03355	0.519079	0.505453	0.457856	1.11394	0.559507	0.597023	1.00451	0.877832	0.348158	1.03448	0.970737	1.01939	0.565695
82	chr1	43794407	44316124	0.48612	0.442949	0.456485	1.02973	0.519546	0.778178	0.360235	0.574934	0.842063	0.566204	0.550405	0.591023	0.975505	0.493023	0.695308	0.578278	0.649859	0.460934	1.02521	1.00461	0.558333	1.15581	0.620394	0.680995	1.01319	0.997503	0.510125	0.972291	0.524925	1.12738	0.595234	1.04404	1.03355	0.519079	0.505453	0.457856	1.11394	0.559507	0.597023	1.00451	0.877832	0.348158	1.03448	0.970737	1.01939	0.565695
83	chr1	44316125	44825171	0.48612	0.442949	0.456485	1.02973	0.519546	0.778178	0.360235	0.574934	0.842063	0.566204	0.550405	0.591023	0.975505	0.493023	0.695308	0.578278	0.649859	0.460934	1.02521	1.00461	0.558333	1.15581	0.620394	0.680995	1.01319	0.997503	0.510125	0.972291	0.524925	1.12738	0.595234	1.04404	1.03355	0.519079	0.505453	0.457856	1.11394	0.559507	0.597023	1.00451	0.877832	0.348158	1.03448	0.970737	1.01939	0.565695
84	chr1	44825172	45381782	0.48612	0.589194	0.456485	1.02973	0.519546	0.778178	0.360235	0.574934	0.842063	0.566204	0.550405	0.591023	0.975505	0.493023	0.695308	0.578278	0.649859	0.460934	1.02521	1.00461	0.558333	1.15581	0.620394	0.680995	1.01319	0.997503	0.510125	0.972291	0.524925	1.12738	0.595234	1.04404	1.03355	0.519079	0.505453	0.457856	1.11394	0.559507	0.597023	1.00451	0.877832	0.348158	1.03448	0.970737	1.01939	0.565695
85	chr1	45381783	45982407	0.48612	0.589194	0.456485	1.02973	0.519546	0.778178	0.360235	0.574934	0.842063	0.566204	0.550405	0.591023	0.975505	0.493023	0.695308	0.578278	0.649859	0.460934	1.02521	1.00461	0.558333	1.15581	0.620394	0.680995	1.01319	0.997503	0.510125	0.972291	0.524925	1.12738	0.595234	1.04404	1.03355	0.519079	0.505453	0.457856	1.11394	0.559507	0.597023	1.00451	0.877832	0.348158	1.03448	0.970737	1.01939	0.565695
86	chr1	45982408	46555657	0.48612	0.589194	0.456485	1.02973	0.519546	0.778178	0.360235	0.574934	0.842063	0.566204	0.550405	0.591023	0.975505	0.493023	0.695308	0.578278	0.649859	0.460934	1.02521	1.00461	0.558333	1.15581	0.620394	0.680995	1.01319	0.997503	0.510125	0.972291	0.524925	1.12738	0.595234	1.04404	1.03355	0.519079	0.505453	0.457856	1.11394	0.559507	0.597023	1.00451	0.877832	0.348158	1.03448	0.970737	1.01939	0.565695
87	chr1	46555658	47105707	0.48612	0.589194	0.456485	1.02973	0.519546	0.778178	0.360235	0.574934	0.842063	0.566204	0.550405	0.591023	0.975505	0.493023	0.695308	0.578278	0.649859	0.460934	1.02521	1.00461	0.558333	1.15581	0.620394	0.680995	1.01319	0.997503	0.510125	0.972291	0.524925	1.12738	0.595234	1.04404	1.03355	0.519079	0.505453	0.457856	1.11394	0.559507	0.597023	1.00451	0.877832	0.348158	1.03448	0.970737	1.01939	0.565695
88	chr1	47105708	47670062	0.48612	0.589194	0.456485	1.02973	0.519546	0.778178	0.360235	0.574934	0.842063	0.566204	0.550405	0.591023	0.975505	0.493023	0.695308	0.578278	0.649859	0.460934	1.02521	1.00461	0.558333	1.15581	0.620394	0.680995	1.01319	0.997503	0.510125	0.972291	0.524925	1.55053	0.595234	1.04404	1.03355	0.519079	0.505453	0.457856	1.11394	0.559507	0.597023	1.00451	0.877832	0.348158	1.03448	0.970737	1.01939	0.565695
89	chr1	47670063	48225609	0.48612	0.589194	0.456485	1.02973	0.519546	0.778178	0.360235	0.574934	0.842063	0.566204	0.550405	0.591023	0.975505	0.493023	0.695308	0.578278	0.649859	0.460934	1.02521	1.00461	0.558333	1.15581	0.620394	0.680995	1.01319	0.997503	0.510125	0.972291	0.524925	1.55053	0.595234	1.04404	1.03355	0.519079	0.505453	0.457856	1.11394	0.559507	0.597023	1.00451	0.877832	0.520378	1.03448	0.970737	1.01939	0.565695
90	chr1	48225610	48777902	0.48612	0.589194	0.456485	1.02973	0.519546	0.778178	0.360235	0.574934	0.842063	0.566204	0.550405	0.591023	0.975505	0.493023	0.695308	0.578278	0.649859	0.460934	1.02521	1.00461	0.558333	1.15581	0.620394	0.680995	1.01319	0.997503	0.510125	0.972291	0.524925	1.55053	0.595234	1.04404	1.03355	0.519079	0.505453	0.457856	1.11394	0.559507	0.597023	1.00451	0.877832	0.520378	1.03448	0.970737	1.01939	0.565695
91	chr1	48777903	49334779	0.48612	0.589194	0.456485	1.02973	0.519546	0.778178	0.360235	0.574934	0.842063	0.566204	0.550405	0.591023	0.975505	0.493023	0.695308	0.578278	0.649859	0.460934	1.02521	1.00461	0.558333	1.15581	0.620394	0.680995	1.01319	0.997503	0.510125	0.972291	0.524925	1.55053	0.595234	1.04404	1.03355	0.519079	0.505453	0.457856	1.11394	0.559507	0.597023	1.00451	0.877832	0.520378	1.03448	0.970737	1.01939	0.565695
92	chr1	49334780	49945727	0.48612	0.589194	0.456485	1.02973	0.519546	0.778178	0.360235	0.574934	0.842063	0.434917	0.550405	0.591023	0.975505	0.493023	0.695308	0.578278	0.649859	0.460934	1.02521	1.00461	0.558333	1.15581	0.620394	0.680995	1.01319	0.997503	0.510125	0.972291	0.524925	1.55053	0.595234	1.04404	1.03355	0.519079	0.505453	0.457856	1.11394	0.559507	0.597023	1.00451	0.877832	0.520378	1.03448	0.970737	1.01939	0.565695
93	chr1	49945728	50600828	0.48612	0.589194	0.456485	1.02973	0.519546	0.778178	0.360235	0.574934	0.842063	0.434917	0.550405	0.591023	0.975505	0.493023	0.695308	0.578278	0.649859	0.460934	1.02521	1.00461	0.558333	1.15581	0.620394	0.680995	1.01319	0.997503	0.510125	0.972291	0.524925	1.55053	0.595234	1.04404	1.03355	0.519079	0.505453	0.457856	1.11394	0.559507	0.597023	1.00451	0.877832	0.520378	1.03448	0.970737	1.01939	0.565695
94	chr1	50600829	51151005	0.48612	0.589194	0.456485	1.02973	0.519546	0.778178	0.228139	0.574934	0.842063	0.434917	0.550405	0.591023	0.975505	0.493023	0.695308	0.578278	0.649859	0.460934	1.02521	1.00461	0.558333	1.15581	0.620394	0.680995	1.01319	0.997503	0.510125	0.972291	0.524925	1.55053	0.595234	1.04404	1.03355	0.519079	0.505453	0.457856	1.11394	0.559507	0.597023	1.00451	0.877832	0.520378	1.03448	0.970737	1.01939	0.565695
95	chr1	51151006	51757726	0.48612	0.589194	0.456485	1.02973	0.519546	0.778178	0.228139	0.574934	0.842063	0.434917	0.550405	0.591023	0.975505	0.493023	0.695308	0.578278	0.649859	0.460934	1.02521	1.00461	0.558333	1.15581	0.620394	0.680995	1.01319	0.997503	0.510125	0.972291	0.524925	1.29201	0.595234	1.04404	1.03355	0.519079	0.505453	0.457856	1.11394	0.559507	0.597023	1.00451	0.877832	0.520378	1.03448	0.970737	1.01939	0.565695
96	chr1	51757727	52332791	0.48612	0.589194	0.456485	1.02973	0.519546	0.778178	0.228139	0.574934	0.842063	0.434917	0.550405	0.591023	0.975505	0.493023	0.695308	0.578278	0.649859	0.460934	1.02521	1.00461	0.558333	0.939413	0.620394	0.680995	1.01319	0.997503	0.510125	0.972291	0.524925	1.29201	0.595234	1.04404	1.03355	0.519079	0.505453	0.457856	1.11394	0.559507	0.597023	1.00451	0.877832	0.520378	1.03448	0.970737	1.01939	0.565695
97	chr1	52332792	52882385	0.48612	0.589194	0.456485	1.02973	0.519546	0.778178	0.228139	0.574934	0.842063	0.434917	0.550405	0.591023	0.975505	0.493023	0.695308	0.578278	0.649859	0.460934	1.02521	1.00461	0.558333	0.939413	0.620394	0.680995	1.01319	0.997503	0.510125	0.972291	0.524925	1.29201	0.595234	1.04404	1.03355	0.519079	0.505453	0.457856	1.11394	0.559507	0.597023	1.00451	0.877832	0.520378	1.03448	0.970737	1.01939	0.565695
98	chr1	52882386	53464136	0.48612	0.589194	0.456485	1.02973	0.519546	0.778178	0.228139	0.574934	0.842063	0.434917	0.550405	0.591023	0.975505	0.493023	0.695308	0.578278	0.649859	0.460934	1.02521	1.00461	0.558333	0.939413	0.620394	0.813833	1.01319	0.997503	0.510125	0.972291	0.524925	1.29201	0.595234	1.04404	1.03355	0.519079	0.505453	0.457856	1.11394	0.559507	0.597023	1.00451	0.877832	0.291825	1.03448	0.970737	1.01939	0.565695
99	chr1	53464137	53974370	0.48612	0.589194	0.456485	1.02973	0.519546	0.778178	0.228139	0.574934	0.842063	0.633624	0.550405	0.591023	0.975505	0.493023	0.695308	0.578278	0.649859	0.460934	1.02521	1.00461	0.558333	0.939413	0.620394	0.813833	1.01319	0.997503	0.510125	0.972291	0.524925	1.29201	0.595234	1.04404	1.03355	0.519079	0.505453	0.457856	1.11394	0.559507	0.597023	1.00451	0.877832	0.291825	1.03448	0.970737	1.01939	0.565695
100	chr1	53974371	54490830	0.48612	0.589194	0.456485	1.02973	0.519546	0.778178	0.228139	0.574934	0.842063	0.633624	0.550405	0.591023	0.975505	0.493023	0.695308	0.578278	0.649859	0.460934	1.02521	1.00461	0.558333	0.939413	0.620394	0.813833	1.01319	0.997503	0.510125	0.972291	0.524925	1.29201	0.595234	1.04404	1.03355	0.519079	0.505453	0.457856	1.11394	0.559507	0.597023	1.00451	0.877832	0.291825	1.03448	0.970737	1.01939	0.565695
101	chr1	54490831	55017871	0.48612	0.589194	0.456485	1.02973	0.519546	0.778178	0.228139	0.574934	0.842063	0.633624	0.550405	0.591023	0.975505	0.493023	0.695308	0.578278	0.649859	0.460934	1.02521	1.00461	0.558333	0.939413	0.620394	0.813833	1.01319	0.997503	0.510125	0.972291	0.524925	1.29201	0.595234	1.04404	1.03355	0.519079	0.505453	0.457856	1.11394	0.559507	0.597023	1.00451	0.877832	0.291825	1.03448	0.970737	1.01939	0.565695
102	chr1	55017872	55545268	0.48612	0.589194	0.456485	1.02973	0.519546	0.778178	0.228139	0.574934	0.842063	0.633624	0.550405	0.591023	0.975505	0.493023	0.695308	0.578278	0.649859	0.460934	1.02521	1.00461	0.558333	0.939413	0.620394	0.813833	1.01319	0.997503	0.510125	0.972291	0.524925	1.29201	0.595234	1.04404	1.03355	0.519079	0.505453	0.457856	1.11394	0.559507	0.597023	1.00451	0.877832	0.38868	1.03448	0.970737	1.01939	0.565695
103	chr1	55545269	56071292	0.48612	0.589194	0.456485	1.02973	0.519546	0.778178	0.228139	0.574934	0.842063	0.633624	0.550405	0.591023	0.975505	0.493023	0.695308	0.578278	0.649859	0.460934	1.02521	1.00461	0.558333	0.939413	0.620394	0.813833	1.01319	0.997503	0.510125	0.972291	0.524925	1.29201	0.595234	1.04404	1.03355	0.519079	0.505453	0.457856	1.11394	0.559507	0.597023	1.00451	0.877832	0.38868	1.03448	0.970737	1.01939	0.565695
104	chr1	56071293	56612909	0.48612	0.589194	0.456485	1.02973	0.519546	0.778178	0.228139	0.574934	0.842063	0.633624	0.550405	0.591023	0.975505	0.493023	0.695308	0.578278	0.649859	0.460934	1.02521	1.00461	0.558333	0.939413	0.620394	0.813833	1.01319	0.997503	0.510125	0.972291	0.524925	1.29201	0.595234	1.04404	1.03355	0.519079	0.505453	0.457856	1.11394	0.559507	0.597023	1.00451	0.877832	0.38868	1.03448	0.970737	1.01939	0.565695
105	chr1	56612910	57165721	0.48612	0.589194	0.456485	1.02973	0.519546	0.778178	0.228139	0.574934	0.842063	0.633624	0.550405	0.591023	0.975505	0.493023	0.695308	0.578278	0.649859	0.460934	1.02521	1.00461	0.558333	0.939413	0.620394	0.813833	1.01319	0.997503	0.510125	0.972291	0.524925	1.29201	0.595234	1.04404	1.03355	0.519079	0.505453	0.457856	1.11394	0.559507	0.597023	1.00451	0.877832	0.38868	1.03448	0.970737	1.01939	0.565695
106	chr1	57165722	57675614	0.48612	0.589194	0.456485	1.02973	0.519546	0.778178	0.228139	0.574934	0.842063	0.633624	0.550405	0.591023	0.975505	0.493023	0.695308	0.578278	0.649859	0.460934	1.02521	1.00461	0.558333	0.939413	0.620394	0.813833	1.01319	0.997503	0.510125	0.972291	0.524925	1.29201	0.595234	1.18436	1.03355	0.519079	0.505453	0.457856	1.11394	0.559507	0.691011	1.00451	0.877832	0.38868	1.03448	0.970737	1.01939	0.565695
107	chr1	57675615	58207672	0.48612	0.589194	0.456485	1.02973	0.519546	0.778178	0.313612	0.574934	0.842063	0.633624	0.550405	0.591023	0.975505	0.493023	0.695308	0.578278	0.649859	0.460934	1.02521	1.00461	0.558333	0.939413	0.620394	0.813833	1.01319	0.997503	0.510125	0.972291	0.524925	1.29201	0.595234	1.18436	1.03355	0.519079	0.505453	0.457856	1.11394	0.559507	0.691011	1.00451	0.877832	0.38868	1.03448	0.970737	1.01939	0.565695
108	chr1	58207673	58753761	0.48612	0.589194	0.456485	1.02973	0.519546	0.778178	0.313612	0.574934	0.842063	0.633624	0.550405	0.591023	0.975505	0.493023	0.695308	0.578278	0.649859	0.460934	1.02521	1.00461	0.558333	0.939413	0.620394	0.813833	1.01319	0.997503	0.510125	0.972291	0.524925	1.29201	0.595234	1.18436	1.03355	0.519079	0.505453	0.457856	1.11394	0.559507	0.691011	1.00451	0.877832	0.38868	1.03448	0.970737	1.01939	0.565695
109	chr1	58753762	59296770	0.48612	0.589194	0.456485	1.02973	0.519546	0.778178	0.313612	0.574934	0.842063	0.633624	0.550405	0.591023	0.975505	0.493023	0.695308	0.578278	0.649859	0.460934	1.02521	1.00461	0.558333	0.939413	0.620394	0.813833	1.01319	0.997503	0.510125	0.972291	0.524925	1.29201	0.595234	1.18436	1.03355	0.519079	0.505453	0.457856	1.11394	0.559507	0.691011	1.00451	0.877832	0.38868	1.03448	0.970737	1.01939	0.565695
110	chr1	59296771	59806590	0.48612	0.589194	0.456485	1.02973	0.519546	0.778178	0.313612	0.574934	0.842063	0.633624	0.550405	0.591023	0.975505	0.493023	0.695308	0.578278	0.649859	0.460934	1.02521	1.00461	0.558333	0.939413	0.620394	0.813833	1.01319	0.997503	0.510125	0.972291	0.524925	1.29201	0.595234	1.18436	1.03355	0.519079	0.505453	0.457856	1.11394	0.559507	0.691011	1.00451	0.877832	0.38868	1.03448	0.970737	1.01939	0.565695
111	chr1	59806591	60380718	0.48612	0.589194	0.456485	1.02973	0.519546	0.778178	0.313612	0.574934	0.842063	0.509717	0.550405	0.591023	0.975505	0.493023	0.695308	0.578278	0.649859	0.460934	1.02521	1.00461	0.558333	0.939413	0.620394	0.813833	1.01319	0.997503	0.510125	0.972291	0.524925	1.29201	0.595234	1.18436	1.03355	0.519079	0.505453	0.457856	1.11394	0.559507	0.691011	1.00451	0.877832	0.38868	1.03448	0.970737	1.01939	0.565695
112	chr1	60380719	60939726	0.48612	0.589194	0.456485	1.02973	0.519546	0.778178	0.313612	0.574934	0.842063	0.509717	0.550405	0.591023	0.975505	0.493023	0.695308	0.578278	0.649859	0.460934	1.02521	1.00461	0.558333	0.939413	0.620394	0.813833	1.01319	0.997503	0.510125	0.972291	0.524925	1.29201	0.595234	1.18436	1.03355	0.519079	0.505453	0.457856	1.11394	0.559507	0.691011	1.00451	0.877832	0.282211	1.03448	0.970737	1.01939	0.565695
113	chr1	60939727	61522369	0.48612	0.589194	0.456485	1.02973	0.519546	0.778178	0.313612	0.574934	0.842063	0.509717	0.550405	0.591023	0.975505	0.493023	0.695308	0.578278	0.649859	0.460934	1.02521	1.00461	0.558333	0.939413	0.620394	0.813833	1.01319	0.997503	0.510125	0.972291	0.524925	1.29201	0.595234	1.18436	1.03355	0.519079	0.505453	0.457856	1.11394	0.559507	0.691011	1.00451	0.877832	0.282211	1.03448	0.970737	1.01939	0.565695
114	chr1	61522370	62069927	0.48612	0.589194	0.456485	1.02973	0.519546	0.778178	0.313612	0.574934	0.842063	0.509717	0.550405	0.591023	0.975505	0.493023	0.695308	0.578278	0.649859	0.460934	1.02521	1.00461	0.558333	0.939413	0.620394	0.813833	1.01319	0.997503	0.510125	0.972291	0.524925	1.29201	0.595234	1.18436	1.03355	0.519079	0.505453	0.457856	1.11394	0.559507	0.691011	1.00451	0.877832	0.282211	1.03448	0.970737	1.01939	0.565695
115	chr1	62069928	62645996	0.48612	0.589194	0.456485	1.02973	0.519546	0.778178	0.313612	0.574934	0.842063	0.509717	0.550405	0.591023	0.975505	0.493023	0.695308	0.578278	0.649859	0.460934	1.02521	1.00461	0.558333	0.939413	0.620394	0.813833	1.01319	0.997503	0.510125	0.972291	0.524925	1.29201	0.595234	1.18436	1.03355	0.519079	0.505453	0.457856	1.11394	0.559507	0.691011	1.00451	0.877832	0.282211	1.03448	0.970737	1.01939	0.565695
116	chr1	62645997	63216789	0.48612	0.589194	0.456485	1.02973	0.519546	0.778178	0.313612	0.574934	0.842063	0.509717	0.550405	0.591023	0.975505	0.493023	0.695308	0.578278	0.649859	0.460934	1.02521	1.00461	0.558333	0.939413	0.620394	0.813833	1.01319	0.997503	0.510125	0.972291	0.524925	1.29201	0.595234	1.18436	1.03355	0.519079	0.505453	0.457856	1.11394	0.559507	0.691011	1.00451	0.877832	0.282211	1.03448	0.970737	1.01939	0.565695
117	chr1	63216790	63778331	0.48612	0.589194	0.456485	1.02973	0.519546	0.778178	0.313612	0.574934	0.842063	0.509717	0.550405	0.591023	0.975505	0.493023	0.695308	0.578278	0.649859	0.460934	1.02521	1.00461	0.558333	0.939413	0.620394	0.813833	1.01319	0.997503	0.510125	0.972291	0.524925	1.29201	0.595234	1.18436	1.03355	0.519079	0.505453	0.457856	1.11394	0.559507	0.691011	1.00451	0.877832	0.605622	1.03448	0.970737	1.01939	0.565695
118	chr1	63778332	64357321	0.48612	0.589194	0.456485	1.02973	0.519546	0.778178	0.497231	0.574934	0.842063	0.509717	0.550405	0.591023	0.975505	0.493023	0.695308	0.578278	0.649859	0.460934	1.02521	1.00461	0.558333	0.939413	0.620394	0.813833	1.01319	0.997503	0.510125	0.972291	0.524925	1.29201	0.595234	1.18436	1.03355	0.519079	0.505453	0.457856	1.11394	0.559507	0.691011	1.00451	0.877832	0.605622	1.03448	0.970737	1.01939	0.565695
119	chr1	64357322	64893475	0.48612	0.589194	0.456485	1.02973	0.519546	0.778178	0.497231	0.574934	0.842063	0.509717	0.550405	0.591023	0.975505	0.493023	0.695308	0.578278	0.649859	0.460934	1.02521	1.00461	0.558333	0.939413	0.620394	0.813833	1.01319	0.997503	0.510125	0.972291	0.524925	1.29201	0.595234	1.18436	1.03355	0.519079	0.505453	0.457856	1.11394	0.559507	0.691011	1.00451	0.877832	0.605622	1.03448	0.970737	1.01939	0.565695
120	chr1	64893476	65443747	0.48612	0.589194	0.456485	1.02973	0.519546	0.778178	0.497231	0.574934	0.842063	0.641465	0.550405	0.591023	0.975505	0.493023	0.695308	0.578278	0.649859	0.460934	1.02521	1.00461	0.558333	0.939413	0.620394	0.813833	1.01319	0.997503	0.510125	0.972291	0.524925	1.29201	0.595234	1.18436	1.03355	0.519079	0.505453	0.457856	1.11394	0.559507	0.691011	1.00451	0.877832	0.605622	1.03448	0.970737	1.01939	0.565695
121	chr1	65443748	66034896	0.48612	0.589194	0.456485	1.02973	0.519546	0.778178	0.497231	0.574934	0.842063	0.641465	0.550405	0.591023	0.975505	0.493023	0.695308	0.578278	0.649859	0.460934	1.02521	1.00461	0.558333	0.939413	0.620394	0.813833	1.01319	0.997503	0.510125	0.972291	0.524925	1.29201	0.595234	1.18436	1.03355	0.519079	0.505453	0.457856	1.11394	0.559507	0.691011	1.00451	0.877832	0.605622	1.03448	0.970737	1.01939	0.565695
122	chr1	66034897	66634161	0.48612	0.589194	0.456485	1.02973	0.519546	0.778178	0.497231	0.574934	0.842063	0.641465	0.550405	0.591023	0.975505	0.493023	0.695308	0.578278	0.649859	0.460934	1.02521	1.00461	0.558333	0.939413	0.620394	0.813833	1.01319	0.997503	0.510125	0.972291	0.524925	1.29201	0.595234	1.18436	1.03355	0.519079	0.505453	0.457856	1.11394	0.559507	0.691011	1.00451	0.877832	0.605622	1.03448	0.970737	1.01939	0.565695
123	chr1	66634162	67152832	0.48612	0.589194	0.456485	1.02973	0.519546	0.778178	0.497231	0.574934	0.842063	0.641465	0.550405	0.591023	0.975505	0.493023	0.695308	0.578278	0.649859	0.460934	1.02521	1.00461	0.558333	0.939413	0.827869	0.813833	1.01319	0.997503	0.510125	0.972291	0.524925	1.29201	0.595234	1.18436	1.03355	0.519079	0.505453	0.457856	1.11394	0.559507	0.691011	1.00451	0.877832	0.605622	1.03448	0.970737	1.01939	0.565695
124	chr1	67152833	67732351	0.48612	0.589194	0.456485	1.02973	0.519546	0.778178	0.497231	0.574934	0.842063	0.641465	0.550405	0.591023	0.975505	0.493023	0.695308	0.578278	0.649859	0.460934	1.02521	1.00461	0.558333	0.939413	0.827869	0.813833	1.01319	0.997503	0.510125	0.972291	0.524925	1.29201	0.595234	1.18436	1.03355	0.519079	0.505453	0.457856	1.11394	0.559507	0.691011	1.00451	0.877832	0.605622	1.03448	0.970737	1.01939	0.565695
125	chr1	67732352	68276604	0.48612	0.589194	0.456485	1.02973	0.519546	0.778178	0.497231	0.574934	0.842063	0.641465	0.550405	0.591023	0.975505	0.493023	0.695308	0.578278	0.649859	0.460934	1.02521	1.00461	0.558333	0.939413	0.827869	0.813833	1.01319	0.997503	0.510125	0.972291	0.524925	1.29201	0.595234	1.18436	1.03355	0.519079	0.505453	0.457856	1.11394	0.559507	0.691011	1.00451	0.877832	0.605622	1.03448	0.970737	1.01939	0.565695
126	chr1	68276605	68817623	0.48612	0.589194	0.456485	1.02973	0.519546	0.778178	0.497231	0.574934	0.842063	0.641465	0.550405	0.591023	0.975505	0.493023	0.695308	0.578278	0.649859	0.460934	1.02521	1.00461	0.558333	0.939413	0.827869	0.813833	1.01319	0.997503	0.510125	0.972291	0.524925	1.29201	0.595234	1.18436	1.03355	0.519079	0.505453	0.457856	1.11394	0.559507	0.691011	1.00451	0.877832	0.470246	1.03448	0.970737	1.01939	0.721517
127	chr1	68817624	69418625	0.48612	0.589194	0.456485	1.02973	0.519546	0.778178	0.274831	0.574934	1.16474	0.641465	0.550405	0.591023	0.975505	0.493023	0.791441	0.578278	0.649859	0.460934	1.02521	1.00461	0.558333	0.939413	0.827869	0.813833	1.01319	0.997503	0.510125	0.972291	0.524925	1.29201	0.595234	1.18436	1.03355	0.519079	0.505453	0.457856	1.11394	0.559507	0.691011	1.00451	0.877832	0.470246	1.03448	0.970737	1.01939	0.721517
128	chr1	69418626	70050103	0.48612	0.589194	0.456485	1.02973	0.519546	0.778178	0.274831	0.574934	1.16474	0.641465	0.550405	0.591023	0.975505	0.493023	0.791441	0.578278	0.649859	0.460934	1.02521	1.00461	0.558333	0.939413	0.827869	0.813833	1.01319	0.997503	0.510125	0.972291	0.524925	1.29201	0.595234	1.18436	1.03355	0.519079	0.505453	0.457856	1.11394	0.559507	0.691011	1.00451	0.877832	0.470246	1.03448	0.970737	1.01939	0.721517
129	chr1	70050104	70656974	0.48612	0.589194	0.456485	1.02973	0.519546	0.778178	0.274831	0.574934	1.16474	0.641465	0.550405	0.591023	0.975505	0.493023	0.791441	0.578278	0.649859	0.460934	1.02521	1.00461	0.558333	0.939413	0.827869	0.813833	1.01319	0.997503	0.510125	0.972291	0.524925	1.29201	0.595234	1.18436	1.03355	0.519079	0.505453	0.457856	1.11394	0.559507	0.691011	1.00451	0.877832	0.470246	1.03448	0.970737	1.01939	0.721517
130	chr1	70656975	71257566	0.48612	0.589194	0.456485	1.02973	0.519546	0.778178	0.274831	0.574934	1.16474	0.641465	0.550405	0.591023	0.975505	0.493023	0.791441	0.578278	0.649859	0.460934	1.02521	1.00461	0.558333	0.939413	0.827869	0.813833	1.01319	0.997503	0.510125	0.972291	0.524925	1.29201	0.595234	1.18436	1.03355	0.519079	0.505453	0.457856	1.11394	0.559507	0.691011	1.00451	0.877832	0.470246	1.03448	0.970737	1.01939	0.721517
131	chr1	71257567	71845356	0.48612	0.589194	0.456485	1.02973	0.519546	0.778178	0.274831	0.574934	1.16474	0.641465	0.550405	0.591023	0.975505	0.493023	0.791441	0.578278	0.649859	0.460934	1.02521	1.00461	0.558333	0.939413	0.827869	0.697328	1.01319	0.997503	0.510125	0.972291	0.524925	1.29201	0.595234	1.18436	1.03355	0.519079	0.505453	0.457856	1.11394	0.559507	0.691011	1.00451	0.877832	0.470246	1.03448	0.970737	1.01939	0.721517
132	chr1	71845357	72472429	0.48612	0.589194	0.456485	1.02973	0.519546	0.778178	0.546129	0.574934	1.16474	0.641465	0.550405	0.591023	0.975505	0.493023	1.07433	0.578278	0.649859	0.460934	1.02521	1.00461	0.558333	0.939413	0.827869	0.697328	1.01319	0.997503	0.510125	0.972291	0.524925	1.29201	0.595234	1.18436	1.03355	0.519079	0.505453	0.457856	1.11394	0.559507	0.691011	1.00451	0.877832	0.470246	1.03448	0.970737	1.01939	0.721517
133	chr1	72472430	73144554	0.48612	0.589194	0.456485	1.02973	0.519546	0.778178	0.546129	0.574934	1.16474	0.641465	0.550405	0.591023	0.975505	0.493023	1.07433	0.578278	0.649859	0.460934	1.02521	1.00461	0.558333	0.939413	0.827869	0.697328	1.01319	0.997503	0.510125	0.972291	0.524925	1.29201	0.595234	1.18436	1.03355	0.519079	0.505453	0.457856	1.11394	0.559507	0.691011	1.00451	0.877832	0.470246	1.03448	0.970737	1.01939	0.721517
134	chr1	73144555	73774849	0.48612	0.589194	0.456485	1.02973	0.519546	0.778178	0.546129	0.574934	1.16474	0.641465	0.550405	0.591023	0.975505	0.493023	1.07433	0.578278	0.649859	0.460934	1.02521	1.00461	0.558333	0.939413	0.827869	0.697328	1.01319	0.997503	0.510125	0.488996	0.524925	1.29201	0.595234	1.18436	1.03355	0.519079	0.505453	0.457856	1.11394	0.559507	0.691011	1.00451	0.877832	0.470246	1.03448	0.970737	1.01939	0.721517
135	chr1	73774850	74407237	0.48612	0.589194	0.456485	1.02973	0.519546	0.778178	0.546129	0.574934	1.16474	0.641465	0.550405	0.591023	0.975505	0.493023	1.07433	0.578278	0.649859	0.460934	1.02521	1.00461	0.558333	0.939413	0.827869	0.697328	1.01319	0.997503	0.510125	0.488996	0.524925	1.29201	0.595234	1.18436	1.03355	0.519079	0.505453	0.457856	1.11394	0.559507	0.691011	1.00451	0.877832	0.470246	1.03448	0.970737	1.01939	0.721517
136	chr1	74407238	75045278	0.48612	0.589194	0.456485	1.02973	0.519546	0.778178	0.546129	0.574934	1.16474	0.641465	0.550405	0.591023	0.975505	0.493023	1.07433	0.578278	0.649859	0.460934	1.02521	1.00461	0.558333	0.939413	0.827869	0.697328	1.01319	0.997503	0.510125	0.967345	0.524925	1.29201	0.595234	1.18436	1.03355	0.519079	0.505453	0.457856	1.11394	0.559507	0.691011	1.00451	0.877832	0.470246	1.03448	0.970737	1.01939	0.721517
137	chr1	75045279	75662881	0.48612	0.589194	0.456485	1.02973	0.519546	0.778178	0.546129	0.574934	1.16474	0.641465	0.550405	0.591023	0.975505	0.493023	1.07433	0.578278	0.649859	0.460934	1.02521	1.00461	0.558333	1.17527	0.827869	0.697328	1.01319	0.997503	0.510125	0.967345	0.524925	1.29201	0.595234	1.18436	1.03355	0.519079	0.505453	0.457856	1.11394	0.559507	0.691011	1.00451	0.877832	0.470246	1.03448	0.970737	1.01939	0.721517
138	chr1	75662882	76288206	0.48612	0.589194	0.456485	1.02973	0.519546	0.778178	0.546129	0.574934	1.16474	0.641465	0.550405	0.591023	0.975505	0.493023	1.07433	0.578278	0.649859	0.460934	1.02521	1.00461	0.558333	1.17527	0.827869	0.697328	1.01319	0.997503	0.510125	0.967345	0.524925	1.29201	0.595234	1.18436	1.03355	0.519079	0.505453	0.457856	1.11394	0.559507	0.691011	1.00451	0.877832	0.470246	1.03448	0.970737	1.01939	0.721517
139	chr1	76288207	76875077	0.48612	0.589194	0.456485	1.02973	0.519546	0.778178	0.546129	0.574934	1.16474	0.535958	0.550405	0.591023	0.975505	0.493023	1.07433	0.578278	0.649859	0.460934	1.02521	1.00461	0.558333	1.17527	0.827869	0.697328	1.01319	0.997503	0.510125	0.967345	0.524925	1.29201	0.595234	1.18436	1.03355	0.519079	0.505453	0.457856	1.11394	0.559507	0.691011	1.00451	0.877832	0.470246	1.03448	0.970737	1.01939	0.721517
140	chr1	76875078	77433567	0.48612	0.589194	0.456485	1.02973	0.519546	0.778178	0.546129	0.574934	1.16474	0.535958	0.550405	0.591023	0.975505	0.493023	1.07433	0.578278	0.649859	0.460934	1.02521	1.00461	0.558333	1.17527	0.827869	0.697328	1.01319	0.997503	0.510125	0.967345	0.524925	1.29201	0.595234	1.18436	1.03355	0.519079	0.505453	0.457856	1.11394	0.559507	0.545092	1.00451	0.877832	0.470246	1.03448	0.970737	1.01939	0.721517
141	chr1	77433568	78014083	0.48612	0.589194	0.456485	1.02973	0.519546	0.778178	0.546129	0.574934	1.16474	0.535958	0.550405	0.591023	0.975505	0.493023	1.07433	0.578278	0.649859	0.460934	1.02521	1.00461	0.558333	1.17527	0.827869	0.697328	1.01319	0.997503	0.510125	0.967345	0.524925	1.29201	0.595234	1.18436	1.03355	0.519079	0.505453	0.457856	1.11394	0.559507	0.545092	1.00451	0.877832	0.470246	1.03448	0.970737	1.01939	0.721517
142	chr1	78014084	78608752	0.48612	0.589194	0.456485	1.02973	0.519546	0.778178	0.546129	0.574934	1.16474	0.535958	0.550405	0.591023	0.975505	0.493023	1.07433	0.578278	0.649859	0.460934	1.02521	1.00461	0.558333	1.17527	0.827869	0.697328	1.01319	0.997503	0.510125	0.967345	0.524925	1.29201	0.595234	1.18436	1.03355	0.519079	0.505453	0.457856	1.11394	0.559507	0.545092	1.00451	0.877832	0.470246	1.03448	0.970737	1.01939	0.721517
143	chr1	78608753	79191996	0.48612	0.589194	0.456485	1.02973	0.519546	0.778178	0.546129	0.574934	1.16474	0.535958	0.550405	0.591023	0.975505	0.493023	1.07433	0.578278	0.649859	0.460934	1.02521	1.00461	0.558333	1.17527	0.827869	0.697328	1.01319	0.997503	0.510125	0.967345	0.524925	1.29201	0.595234	1.18436	1.03355	0.519079	0.505453	0.457856	1.11394	0.559507	0.545092	1.00451	0.877832	0.593036	1.03448	0.970737	1.01939	0.721517
144	chr1	79191997	79812996	0.48612	0.589194	0.456485	1.02973	0.519546	0.778178	0.546129	0.574934	1.16474	0.535958	0.550405	0.591023	0.975505	0.493023	1.07433	0.578278	0.649859	0.460934	1.02521	1.00461	0.558333	1.17527	0.827869	0.697328	1.01319	0.997503	0.510125	0.967345	0.524925	1.29201	0.595234	1.18436	1.03355	0.519079	0.505453	0.457856	1.11394	0.559507	0.545092	1.00451	0.877832	0.593036	1.03448	0.970737	1.01939	0.721517
145	chr1	79812997	80447542	0.48612	0.589194	0.456485	1.02973	0.519546	0.778178	0.546129	0.574934	1.16474	0.535958	0.550405	0.591023	0.975505	0.493023	1.07433	0.578278	0.649859	0.460934	1.02521	1.00461	0.474212	1.17527	0.827869	0.697328	1.01319	0.997503	0.510125	0.967345	0.524925	1.29201	0.595234	1.18436	1.03355	0.519079	0.505453	0.457856	1.11394	0.559507	0.545092	1.00451	0.877832	0.593036	1.03448	0.970737	1.01939	0.721517
146	chr1	80447543	81097252	0.48612	0.589194	0.456485	1.02973	0.519546	0.778178	0.546129	0.574934	1.16474	0.535958	0.550405	0.591023	0.975505	0.493023	1.07433	0.578278	0.649859	0.460934	1.02521	1.00461	0.474212	1.17527	0.827869	0.697328	1.01319	0.997503	0.510125	0.967345	0.524925	1.29201	0.595234	1.18436	1.03355	0.519079	0.505453	0.457856	1.11394	0.559507	0.545092	1.00451	0.877832	0.593036	1.03448	0.970737	1.01939	0.721517
147	chr1	81097253	81720993	0.48612	0.589194	0.456485	1.02973	0.519546	0.778178	0.546129	0.574934	1.16474	0.60951	0.550405	0.591023	0.975505	0.493023	1.07433	0.578278	0.649859	0.460934	1.02521	1.00461	0.474212	1.17527	0.827869	0.697328	1.01319	0.997503	0.510125	0.967345	0.524925	1.29201	0.595234	1.18436	1.03355	0.519079	0.505453	0.457856	1.11394	0.559507	0.545092	1.00451	0.877832	0.593036	1.03448	0.970737	1.01939	0.721517
148	chr1	81720994	82290104	0.48612	0.589194	0.456485	1.02973	0.519546	0.778178	0.546129	0.574934	1.16474	0.60951	0.550405	0.591023	0.975505	0.493023	1.07433	0.578278	0.649859	0.460934	1.02521	1.00461	0.474212	1.17527	0.827869	0.697328	1.01319	0.997503	0.510125	0.967345	0.524925	1.29201	0.595234	1.18436	1.03355	0.519079	0.505453	0.457856	1.11394	0.559507	0.545092	1.00451	0.877832	0.593036	1.03448	0.970737	1.01939	0.721517
149	chr1	82290105	82880592	0.48612	0.589194	0.456485	1.02973	0.519546	0.778178	0.546129	0.574934	1.16474	0.60951	0.550405	0.591023	0.975505	0.493023	1.07433	0.578278	0.649859	0.460934	1.02521	1.00461	0.474212	1.17527	0.827869	0.697328	1.01319	0.997503	0.510125	0.967345	0.524925	1.29201	0.595234	1.18436	1.03355	0.519079	0.505453	0.457856	1.11394	0.559507	0.545092	1.00451	0.877832	0.593036	1.03448	0.970737	1.01939	0.721517
150	chr1	82880593	83494495	0.48612	0.589194	0.456485	1.02973	0.519546	0.778178	0.546129	0.574934	1.16474	0.60951	0.550405	0.591023	0.975505	0.493023	1.07433	0.578278	0.649859	0.460934	1.02521	1.00461	0.474212	1.17527	0.827869	0.697328	1.01319	0.997503	0.510125	0.967345	0.524925	1.29201	0.595234	1.18436	1.03355	0.519079	0.505453	0.457856	1.11394	0.559507	0.545092	1.00451	0.877832	0.593036	1.03448	0.970737	1.01939	0.721517
151	chr1	83494496	84076510	0.48612	0.589194	0.456485	1.02973	0.519546	0.778178	0.546129	0.574934	1.16474	0.60951	0.550405	0.591023	0.975505	0.493023	1.07433	0.578278	0.649859	0.460934	1.02521	1.00461	0.474212	1.17527	0.827869	0.697328	1.01319	0.997503	0.510125	0.967345	0.524925	1.29201	0.595234	1.18436	1.03355	0.519079	0.505453	0.457856	1.11394	0.559507	0.545092	1.00451	0.877832	0.593036	1.03448	0.970737	1.01939	0.721517
152	chr1	84076511	84674563	0.48612	0.589194	0.456485	1.02973	0.519546	0.778178	0.546129	0.574934	1.16474	0.60951	0.550405	0.591023	0.975505	0.493023	1.07433	0.578278	0.649859	0.460934	1.02521	1.00461	0.474212	1.17527	0.827869	0.697328	1.01319	0.997503	0.510125	0.967345	0.524925	1.29201	0.595234	1.18436	1.03355	0.519079	0.505453	0.457856	1.11394	0.559507	0.545092	1.00451	0.877832	0.593036	1.03448	0.970737	1.01939	0.721517
153	chr1	84674564	85228907	0.48612	0.589194	0.456485	1.02973	0.519546	0.778178	0.546129	0.574934	1.16474	0.60951	0.550405	0.591023	0.975505	0.493023	0.755708	0.578278	0.649859	0.460934	1.02521	1.00461	0.474212	1.17527	0.827869	0.697328	1.01319	0.997503	0.510125	0.967345	0.524925	1.29201	0.595234	1.18436	1.03355	0.519079	0.505453	0.457856	1.11394	0.559507	0.545092	1.00451	0.877832	0.593036	1.03448	0.970737	1.01939	0.721517
154	chr1	85228908	85760592	0.48612	0.589194	0.456485	1.02973	0.519546	0.778178	0.546129	0.574934	1.16474	0.60951	0.550405	0.591023	0.975505	0.493023	0.755708	0.578278	0.649859	0.460934	1.02521	1.00461	0.474212	1.17527	0.827869	0.697328	1.01319	0.997503	0.510125	0.967345	0.524925	1.29201	0.595234	1.18436	1.03355	0.519079	0.505453	0.457856	1.11394	0.559507	0.545092	1.00451	0.877832	0.593036	1.03448	0.970737	1.01939	0.721517
155	chr1	85760593	86335646	0.48612	0.589194	0.456485	1.02973	0.519546	0.778178	0.310057	0.574934	1.16474	0.517679	0.550405	0.591023	0.975505	0.493023	0.755708	0.578278	0.649859	0.460934	1.02521	1.00461	0.474212	1.17527	0.827869	0.697328	1.01319	0.997503	0.510125	0.967345	0.524925	1.29201	0.595234	1.18436	1.03355	0.519079	0.505453	0.457856	1.11394	0.559507	0.545092	1.00451	0.877832	0.593036	1.03448	0.970737	1.01939	0.721517
156	chr1	86335647	86956300	0.48612	0.589194	0.456485	1.02973	0.519546	0.778178	0.310057	0.574934	1.16474	0.517679	0.550405	0.591023	0.975505	0.493023	0.755708	0.578278	0.649859	0.460934	1.02521	1.00461	0.474212	1.17527	0.827869	0.697328	1.01319	0.997503	0.510125	0.967345	0.524925	1.59887	0.595234	1.18436	1.03355	0.519079	0.505453	0.457856	1.11394	0.559507	0.545092	1.00451	0.877832	0.593036	1.03448	0.970737	1.01939	0.721517
157	chr1	86956301	87555322	0.48612	0.589194	0.456485	1.02973	0.519546	0.778178	0.310057	0.574934	1.16474	0.517679	0.550405	0.591023	0.975505	0.493023	0.755708	0.578278	0.649859	0.460934	1.02521	1.00461	0.474212	1.17527	0.827869	0.697328	1.01319	0.997503	0.510125	0.967345	0.524925	1.59887	0.595234	1.18436	1.03355	0.519079	0.505453	0.457856	1.11394	0.559507	0.545092	1.00451	0.877832	0.593036	1.03448	0.970737	1.01939	0.721517
158	chr1	87555323	88076806	0.48612	0.589194	0.456485	1.02973	0.519546	0.778178	0.310057	0.574934	1.16474	0.517679	0.550405	0.591023	0.975505	0.493023	0.755708	0.578278	0.649859	0.460934	1.02521	1.00461	0.474212	1.17527	0.827869	0.697328	1.01319	0.997503	0.510125	0.967345	0.524925	1.59887	0.595234	1.18436	1.03355	0.519079	0.505453	0.457856	1.11394	0.559507	0.545092	1.00451	0.877832	0.593036	1.03448	0.970737	1.01939	1.16009
159	chr1	88076807	88632427	0.48612	0.589194	0.456485	1.02973	0.519546	0.778178	0.310057	0.574934	1.16474	0.517679	0.550405	0.591023	0.975505	0.493023	0.755708	0.578278	0.649859	0.460934	1.02521	1.00461	0.474212	1.17527	0.827869	0.697328	1.01319	0.997503	0.510125	0.967345	0.524925	1.59887	0.595234	1.18436	1.03355	0.519079	0.505453	0.457856	1.11394	0.559507	0.545092	1.00451	0.877832	0.593036	1.03448	0.970737	1.01939	1.16009
160	chr1	88632428	89234116	0.48612	0.589194	0.456485	1.02973	0.519546	0.778178	0.310057	0.574934	1.16474	0.517679	0.550405	0.591023	0.975505	0.493023	0.755708	0.578278	0.649859	0.460934	1.02521	1.00461	0.474212	1.17527	0.827869	1.2457	1.01319	0.997503	0.510125	0.967345	0.524925	1.59887	0.595234	1.18436	1.03355	0.519079	0.505453	0.457856	1.11394	0.559507	0.545092	1.00451	0.877832	0.593036	1.03448	0.970737	1.01939	1.16009
161	chr1	89234117	89835964	1.00451	1.10153	1.02041	1.02973	1.01238	1.20141	0.798277	0.574934	1.16474	0.517679	0.9687	0.89003	0.975505	0.924317	0.755708	0.978827	0.649859	0.907738	1.02521	1.00461	0.474212	1.17527	1.11851	1.2457	1.01319	0.997503	1.00652	0.967345	1.05749	1.59887	1.20274	1.18436	1.03355	1.02562	0.991834	0.92367	1.11394	1.10131	1.24533	1.00451	0.877832	1.14499	1.03448	0.970737	1.01939	1.16009
162	chr1	89835965	90417012	1.00451	1.10153	1.02041	1.02973	1.01238	1.20141	0.798277	1.01755	1.16474	0.973361	0.9687	0.89003	0.975505	0.924317	0.755708	0.978827	0.649859	0.907738	1.02521	1.00461	0.984521	1.17527	1.11851	1.2457	1.01319	0.997503	1.00652	0.967345	1.05749	1.59887	1.20274	1.18436	1.03355	1.02562	0.991834	0.92367	1.11394	1.10131	1.24533	1.00451	0.877832	1.14499	1.03448	0.970737	1.01939	1.16009
163	chr1	90417013	90984240	1.00451	1.10153	1.02041	1.02973	1.01238	1.20141	0.798277	1.01755	1.16474	0.973361	0.9687	0.89003	0.975505	0.924317	0.755708	0.978827	0.649859	0.907738	1.02521	1.00461	0.984521	1.17527	1.11851	1.2457	1.01319	0.997503	1.00652	0.967345	1.05749	1.59887	1.20274	1.18436	1.03355	1.02562	0.991834	0.92367	1.11394	1.10131	1.24533	1.00451	0.877832	1.14499	1.03448	0.970737	1.01939	1.16009
164	chr1	90984241	91590270	1.00451	1.10153	1.02041	1.02973	1.01238	1.20141	0.798277	1.01755	1.16474	0.973361	0.9687	1.12524	0.529035	0.924317	0.755708	0.978827	1.16556	0.907738	1.02521	1.00461	0.984521	1.17527	1.11851	1.2457	1.01319	0.997503	1.00652	0.967345	1.05749	1.59887	1.20274	1.18436	1.03355	1.02562	0.991834	0.92367	1.11394	1.10131	1.24533	1.00451	0.877832	1.14499	1.03448	0.970737	1.01939	1.16009
165	chr1	91590271	92184429	1.00451	1.10153	1.02041	1.02973	1.01238	1.20141	0.798277	1.01755	1.16474	0.821766	0.9687	1.12524	0.529035	0.924317	0.755708	0.978827	1.16556	0.907738	1.02521	1.00461	0.984521	1.17527	1.11851	1.2457	1.01319	0.997503	1.00652	0.967345	1.05749	1.59887	1.20274	1.18436	1.03355	1.02562	0.991834	0.92367	1.11394	1.10131	1.24533	1.00451	0.877832	1.14499	1.03448	0.970737	1.01939	1.16009
166	chr1	92184430	92781375	1.00451	1.10153	1.02041	1.02973	1.01238	1.20141	0.798277	1.01755	1.16474	0.821766	0.9687	1.12524	0.529035	0.924317	0.755708	0.978827	1.16556	0.907738	1.02521	1.00461	0.984521	1.17527	1.11851	1.2457	1.01319	0.997503	1.00652	0.967345	1.05749	1.59887	1.20274	1.18436	1.03355	1.02562	0.991834	0.92367	1.11394	1.10131	1.24533	1.00451	0.877832	1.14499	1.03448	0.970737	1.01939	1.16009
167	chr1	92781376	93411980	1.00451	1.10153	1.02041	1.02973	1.01238	1.20141	0.798277	1.01755	1.16474	0.821766	0.9687	1.12524	0.529035	0.924317	0.755708	0.978827	1.16556	0.907738	1.02521	1.00461	0.984521	0.956571	1.11851	1.2457	1.01319	0.997503	1.00652	0.967345	1.05749	1.59887	1.20274	1.18436	1.03355	1.02562	0.991834	0.92367	1.11394	1.10131	1.24533	1.00451	0.877832	1.14499	1.03448	0.970737	1.01939	1.16009
168	chr1	93411981	94022121	1.00451	1.10153	1.02041	1.02973	1.01238	1.20141	1.10065	1.01755	1.16474	0.821766	0.9687	1.12524	0.982652	0.924317	0.755708	0.978827	1.16556	0.907738	1.02521	1.00461	0.984521	0.956571	1.11851	1.2457	1.01319	0.997503	1.00652	0.967345	1.05749	1.59887	1.20274	1.18436	1.03355	1.02562	0.991834	0.92367	1.11394	1.10131	1.24533	1.00451	0.877832	1.14499	1.03448	0.970737	1.01939	1.16009
169	chr1	94022122	94532104	1.00451	1.10153	1.02041	1.02973	1.01238	1.20141	1.10065	1.01755	1.16474	0.821766	0.9687	1.12524	0.982652	0.924317	0.755708	0.978827	1.16556	0.907738	1.02521	1.00461	0.984521	0.956571	1.11851	1.2457	1.01319	0.997503	1.00652	0.967345	1.05749	1.59887	1.20274	1.18436	1.03355	1.02562	0.991834	0.92367	1.11394	1.10131	1.24533	1.00451	0.877832	1.14499	1.03448	0.970737	1.01939	1.16009
170	chr1	94532105	95085962	1.00451	1.10153	1.02041	1.02973	1.01238	1.20141	1.10065	1.01755	1.16474	0.821766	0.9687	1.12524	0.982652	0.924317	0.755708	0.978827	1.16556	0.907738	1.02521	1.00461	0.984521	0.956571	1.11851	1.2457	1.01319	0.997503	1.00652	0.967345	1.05749	1.59887	1.20274	1.18436	1.03355	1.02562	0.991834	0.92367	1.11394	1.10131	1.24533	1.00451	0.877832	1.14499	1.03448	0.970737	1.01939	1.16009
171	chr1	95085963	95614269	1.00451	1.10153	1.02041	1.02973	1.01238	1.20141	1.10065	1.01755	1.16474	1.01786	0.9687	1.12524	0.982652	0.924317	0.755708	0.978827	1.16556	0.907738	1.02521	1.00461	0.984521	0.956571	1.11851	1.2457	1.01319	0.997503	1.00652	0.967345	1.05749	1.59887	1.20274	1.18436	1.03355	1.02562	0.991834	0.92367	1.11394	1.10131	1.24533	1.00451	0.877832	1.14499	1.03448	0.970737	1.01939	1.16009
172	chr1	95614270	96185750	1.00451	1.10153	1.02041	1.02973	1.01238	1.20141	1.10065	1.01755	1.16474	1.01786	0.9687	1.12524	0.982652	0.924317	0.755708	0.978827	1.16556	0.907738	1.02521	1.00461	0.984521	0.956571	1.11851	1.2457	1.01319	0.997503	1.00652	0.967345	1.05749	1.59887	1.20274	1.18436	1.03355	1.02562	0.991834	0.92367	1.11394	1.10131	1.24533	1.00451	0.877832	1.14499	1.03448	0.970737	1.01939	1.16009
173	chr1	96185751	96773407	1.00451	1.10153	1.02041	1.02973	1.01238	1.20141	1.10065	1.01755	1.16474	1.01786	0.9687	1.12524	0.982652	0.924317	0.755708	0.978827	1.16556	0.907738	1.02521	1.00461	0.984521	0.956571	1.11851	1.2457	1.01319	0.997503	1.00652	0.967345	1.05749	1.59887	1.20274	1.18436	1.03355	1.02562	0.991834	0.92367	1.11394	1.10131	1.24533	1.00451	0.877832	1.14499	1.03448	0.970737	1.01939	1.16009
174	chr1	96773408	97369806	1.00451	1.10153	1.02041	1.02973	1.01238	1.20141	1.10065	1.01755	1.16474	1.01786	0.9687	1.12524	0.982652	0.924317	0.755708	0.978827	1.16556	0.907738	1.02521	1.00461	0.984521	0.956571	1.11851	1.2457	1.01319	0.997503	1.00652	0.967345	1.05749	1.59887	1.20274	1.18436	1.03355	1.02562	0.991834	0.92367	1.11394	1.10131	1.24533	1.00451	0.877832	1.14499	1.03448	0.970737	1.01939	1.16009
175	chr1	97369807	97970896	1.00451	1.10153	1.02041	1.02973	1.01238	1.20141	1.10065	1.01755	1.16474	1.01786	0.9687	1.12524	0.982652	0.924317	0.755708	0.978827	1.16556	0.907738	1.02521	1.00461	0.984521	0.956571	1.11851	0.93763	1.01319	0.997503	1.00652	0.967345	1.05749	1.59887	1.20274	1.18436	1.03355	1.02562	0.991834	0.92367	1.11394	1.10131	1.24533	1.00451	0.877832	1.14499	1.03448	0.970737	1.01939	1.16009
176	chr1	97970897	98578727	1.00451	1.10153	1.02041	1.02973	1.01238	1.20141	1.10065	1.01755	1.16474	1.01786	0.9687	1.12524	0.982652	0.924317	0.755708	0.978827	1.16556	0.907738	1.02521	1.00461	0.984521	0.956571	1.11851	0.93763	1.01319	0.997503	1.00652	0.967345	1.05749	1.59887	1.20274	1.18436	1.03355	1.02562	0.991834	0.92367	1.11394	1.10131	1.24533	1.00451	0.877832	1.14499	1.03448	0.970737	1.01939	1.16009
177	chr1	98578728	99172535	1.00451	1.10153	1.02041	1.02973	1.01238	1.65914	1.10065	1.01755	1.16474	1.01786	0.9687	1.12524	0.982652	0.924317	0.755708	0.978827	1.16556	0.907738	1.02521	1.00461	1.13883	0.956571	1.11851	0.93763	1.01319	0.997503	1.00652	0.967345	1.05749	1.59887	1.20274	1.18436	1.03355	1.02562	0.991834	0.92367	1.11394	1.10131	0.802037	1.00451	0.877832	1.14499	1.03448	0.970737	1.01939	1.16009
178	chr1	99172536	99790172	1.00451	1.10153	1.02041	1.02973	1.01238	1.65914	1.10065	1.01755	1.16474	1.01786	0.9687	1.12524	0.982652	0.924317	0.755708	0.978827	1.16556	0.907738	1.02521	1.00461	1.13883	0.956571	1.11851	0.93763	1.01319	0.997503	1.00652	0.967345	1.05749	1.59887	1.20274	1.18436	1.03355	1.02562	0.991834	0.92367	1.11394	1.10131	0.802037	1.00451	0.877832	1.14499	1.03448	0.970737	1.01939	1.16009
179	chr1	99790173	100382303	1.00451	1.10153	1.02041	1.02973	1.01238	1.65914	1.10065	1.01755	1.16474	1.01786	0.9687	1.12524	0.982652	0.924317	0.755708	0.978827	1.16556	0.907738	1.02521	1.00461	1.13883	0.956571	1.11851	0.93763	1.01319	0.997503	1.00652	0.967345	1.05749	1.59887	1.20274	1.18436	1.03355	1.02562	0.991834	0.92367	1.11394	1.10131	0.802037	1.00451	0.877832	1.14499	1.03448	0.970737	1.01939	1.16009
180	chr1	100382304	100970376	1.00451	1.10153	1.02041	1.02973	1.01238	1.65914	1.10065	0.589017	1.16474	1.01786	0.9687	1.12524	0.982652	0.564396	0.755708	0.978827	1.16556	0.907738	1.02521	1.00461	1.13883	0.956571	1.11851	0.93763	1.01319	0.997503	1.00652	0.967345	1.05749	1.59887	0.545692	1.18436	1.03355	1.02562	0.991834	0.92367	1.11394	1.10131	0.802037	1.00451	0.877832	1.14499	1.03448	0.970737	1.01939	1.16009
181	chr1	100970377	101575036	1.00451	1.10153	1.36574	1.02973	1.01238	1.65914	1.10065	0.589017	1.16474	1.01786	0.9687	1.12524	0.982652	0.564396	0.755708	0.978827	1.16556	0.907738	1.02521	1.00461	1.13883	0.956571	1.11851	0.93763	1.01319	0.997503	1.00652	0.967345	1.05749	1.59887	0.545692	1.18436	1.03355	0.874415	0.991834	0.92367	1.11394	1.10131	0.802037	1.00451	0.877832	1.14499	1.03448	0.970737	1.01939	1.16009
182	chr1	101575037	102162511	1.00451	1.10153	1.36574	1.02973	1.01238	1.65914	1.10065	0.589017	1.16474	1.01786	0.9687	1.12524	0.982652	0.564396	0.755708	0.978827	1.16556	0.907738	1.02521	1.00461	1.13883	0.956571	1.11851	0.93763	1.01319	0.997503	1.00652	0.967345	1.05749	1.59887	0.545692	1.18436	1.03355	0.874415	0.991834	0.92367	1.11394	1.10131	0.802037	1.00451	0.877832	1.14499	1.03448	0.970737	1.01939	1.16009
183	chr1	102162512	102821319	1.00451	1.10153	1.36574	1.02973	1.01238	1.65914	1.10065	0.589017	1.16474	1.01786	0.9687	1.12524	0.982652	0.564396	1.0285	0.978827	1.16556	0.907738	1.02521	1.00461	1.13883	0.956571	1.11851	0.93763	1.01319	0.997503	1.00652	0.967345	1.05749	1.59887	0.545692	1.18436	1.03355	0.874415	0.991834	0.92367	1.11394	1.10131	0.802037	1.00451	0.877832	1.14499	1.03448	0.970737	1.01939	1.16009
184	chr1	102821320	103522641	1.00451	1.10153	1.36574	1.02973	1.01238	1.65914	1.10065	0.589017	1.16474	1.01786	0.9687	1.12524	0.982652	0.564396	1.0285	0.978827	1.16556	0.907738	1.02521	1.00461	1.13883	0.956571	1.11851	0.93763	1.01319	0.997503	1.00652	0.967345	1.05749	1.59887	0.545692	1.18436	1.03355	0.874415	0.991834	0.92367	1.11394	1.10131	0.802037	1.00451	0.877832	1.14499	1.03448	0.970737	1.01939	1.16009
185	chr1	103522642	104275074	1.00451	1.10153	1.36574	1.02973	1.01238	1.65914	1.10065	0.589017	1.16474	1.01786	0.9687	1.12524	0.982652	0.564396	1.0285	0.978827	1.16556	0.907738	1.02521	1.00461	1.13883	0.956571	1.11851	0.93763	1.01319	0.997503	1.00652	0.967345	1.05749	1.59887	0.545692	1.18436	1.03355	0.874415	0.991834	0.92367	1.11394	1.10131	0.802037	1.00451	0.877832	1.14499	1.03448	0.970737	1.01939	1.16009
186	chr1	104275075	104935505	1.00451	1.10153	1.36574	1.02973	1.01238	1.65914	1.10065	0.589017	1.16474	1.01786	0.9687	1.12524	0.982652	0.564396	1.0285	0.978827	1.16556	0.907738	1.02521	1.00461	1.13883	0.956571	1.11851	0.93763	1.01319	0.997503	1.00652	0.967345	1.05749	1.59887	0.545692	1.18436	1.03355	0.874415	0.991834	0.92367	1.11394	1.10131	0.802037	1.00451	0.877832	1.14499	1.03448	0.970737	1.01939	1.16009
187	chr1	104935506	105624180	1.00451	1.10153	1.36574	1.02973	1.01238	1.65914	1.10065	0.589017	1.16474	0.848318	0.9687	1.12524	0.982652	0.564396	1.0285	0.978827	1.16556	0.907738	1.02521	1.00461	1.13883	0.956571	1.11851	0.93763	1.01319	0.997503	1.00652	0.967345	1.05749	1.37493	0.545692	1.18436	1.03355	0.874415	0.991834	0.92367	1.11394	1.10131	0.802037	1.00451	0.877832	1.14499	1.03448	0.970737	1.01939	1.16009
188	chr1	105624181	106333559	1.00451	1.10153	1.36574	1.02973	1.01238	1.65914	1.10065	0.589017	1.16474	0.848318	0.9687	1.12524	0.982652	0.564396	1.0285	0.978827	1.16556	0.907738	1.02521	1.00461	1.13883	0.956571	1.11851	0.93763	1.01319	0.997503	1.00652	0.967345	1.05749	1.37493	0.545692	1.18436	1.03355	0.874415	0.991834	0.92367	1.11394	1.10131	0.802037	1.00451	0.877832	1.14499	1.03448	0.970737	1.01939	1.16009
189	chr1	106333560	107010452	1.00451	1.10153	1.36574	1.02973	1.01238	1.65914	1.10065	0.589017	1.16474	0.848318	0.9687	1.12524	0.982652	0.564396	1.0285	0.978827	1.16556	0.907738	1.02521	1.00461	1.13883	0.956571	1.11851	0.93763	1.01319	0.997503	1.00652	0.967345	1.05749	1.37493	0.545692	1.18436	1.03355	0.874415	0.991834	0.92367	1.11394	1.10131	0.802037	1.00451	0.877832	1.14499	1.03448	0.970737	1.01939	1.16009
190	chr1	107010453	107647138	1.00451	1.10153	1.36574	1.02973	1.01238	1.65914	1.10065	0.589017	1.16474	0.848318	0.9687	1.12524	0.982652	0.564396	1.0285	0.978827	1.16556	0.907738	1.02521	1.00461	1.13883	0.956571	1.11851	0.93763	1.01319	0.997503	1.00652	0.967345	1.05749	1.37493	0.545692	1.18436	1.03355	0.874415	0.991834	0.92367	1.11394	1.10131	0.802037	1.00451	0.877832	1.14499	1.03448	0.970737	1.01939	1.16009
191	chr1	107647139	108209610	1.00451	1.10153	1.36574	1.02973	1.01238	1.65914	1.10065	0.589017	1.16474	0.848318	0.9687	1.12524	0.982652	0.564396	0.688115	0.978827	1.16556	0.907738	1.02521	1.00461	1.13883	0.956571	1.11851	0.93763	1.01319	0.997503	1.00652	0.967345	1.05749	1.37493	0.545692	1.18436	1.03355	0.874415	0.991834	0.92367	1.11394	1.10131	0.802037	1.00451	0.877832	1.14499	1.03448	0.970737	1.01939	1.16009
192	chr1	108209611	108790410	1.00451	1.10153	1.36574	1.02973	1.01238	1.65914	1.10065	0.589017	1.16474	0.848318	0.9687	1.12524	0.982652	0.564396	0.688115	0.978827	1.16556	0.907738	1.02521	1.00461	1.13883	0.956571	1.11851	0.93763	1.01319	0.997503	1.00652	0.967345	1.05749	1.37493	0.545692	1.18436	1.03355	0.874415	0.991834	0.92367	1.11394	1.10131	0.802037	1.00451	0.877832	1.14499	1.03448	0.970737	1.01939	1.16009
193	chr1	108790411	109312955	1.00451	1.10153	1.36574	1.02973	1.01238	1.65914	1.10065	0.589017	1.16474	0.848318	0.9687	1.12524	0.982652	0.564396	0.688115	0.978827	1.16556	0.907738	1.02521	1.00461	1.13883	0.956571	1.11851	0.93763	1.01319	0.997503	1.00652	0.967345	1.05749	1.37493	0.545692	1.18436	1.03355	0.874415	0.991834	0.92367	1.11394	1.10131	0.802037	1.00451	0.877832	1.14499	1.03448	0.970737	1.01939	1.16009
194	chr1	109312956	109881076	1.00451	1.10153	1.36574	1.02973	1.01238	1.65914	1.10065	0.589017	1.16474	0.748862	0.9687	0.962809	0.982652	0.564396	0.688115	0.978827	1.16556	0.907738	1.02521	1.00461	1.13883	0.956571	1.11851	0.93763	1.01319	0.997503	1.00652	0.967345	1.05749	1.37493	0.545692	1.18436	1.03355	0.874415	0.991834	0.92367	1.11394	1.10131	0.802037	1.00451	0.877832	1.14499	1.03448	0.970737	1.01939	1.16009
195	chr1	109881077	110383595	1.00451	1.10153	1.36574	1.02973	1.01238	1.65914	1.10065	0.589017	1.16474	0.748862	0.9687	0.962809	0.982652	0.564396	0.688115	0.978827	1.16556	0.907738	1.02521	1.00461	1.13883	0.956571	1.11851	0.93763	1.01319	0.997503	1.00652	0.967345	1.05749	1.37493	0.545692	1.18436	1.03355	0.874415	0.991834	0.92367	1.11394	1.10131	0.802037	1.00451	0.877832	1.14499	1.03448	0.970737	1.01939	1.16009
196	chr1	110383596	110886689	1.00451	1.10153	1.36574	1.02973	1.01238	1.65914	1.10065	0.589017	1.16474	0.748862	0.9687	0.962809	0.982652	0.564396	0.688115	0.978827	1.16556	0.907738	1.02521	1.00461	1.13883	0.956571	1.11851	0.93763	1.01319	0.997503	1.00652	0.967345	1.05749	1.37493	0.545692	1.18436	1.03355	0.874415	0.991834	0.92367	1.11394	1.10131	0.802037	1.00451	0.877832	1.14499	1.03448	0.970737	1.01939	1.16009
197	chr1	110886690	111420648	1.00451	1.10153	1.36574	1.02973	1.01238	1.65914	1.10065	0.589017	1.16474	0.748862	0.9687	0.962809	0.982652	0.564396	0.688115	0.978827	1.16556	0.907738	1.02521	1.00461	1.13883	0.956571	1.11851	0.93763	1.01319	0.997503	1.00652	0.967345	1.05749	1.37493	0.545692	1.18436	1.03355	0.874415	0.991834	0.92367	1.11394	1.10131	0.802037	1.00451	0.877832	1.14499	1.03448	0.970737	1.01939	1.16009
198	chr1	111420649	111996937	1.00451	1.10153	1.36574	1.02973	1.01238	1.65914	1.10065	0.589017	1.16474	0.748862	0.9687	0.962809	0.982652	0.564396	0.688115	0.978827	1.16556	0.907738	1.02521	1.00461	1.13883	0.956571	1.11851	0.93763	1.01319	0.997503	1.00652	0.967345	1.05749	1.37493	0.545692	1.18436	1.03355	0.874415	0.991834	0.92367	1.11394	1.10131	1.18958	1.00451	0.877832	1.14499	1.03448	0.970737	1.01939	1.16009
199	chr1	111996938	112507588	1.00451	1.10153	1.36574	1.02973	1.01238	1.65914	1.10065	0.589017	1.16474	0.748862	0.9687	0.962809	0.982652	0.564396	0.688115	0.978827	1.16556	0.907738	1.02521	1.00461	1.13883	0.956571	1.11851	0.93763	1.01319	0.997503	1.00652	0.967345	1.05749	1.37493	0.545692	1.18436	1.03355	1.06769	0.991834	0.92367	1.11394	1.10131	1.18958	1.00451	0.877832	1.14499	1.03448	0.970737	1.01939	1.16009
200	chr1	112507589	113064713	1.00451	1.10153	1.36574	1.02973	1.01238	1.65914	1.10065	0.589017	1.16474	0.748862	0.9687	0.962809	0.982652	0.564396	0.688115	0.978827	1.16556	0.907738	1.02521	1.00461	1.13883	0.956571	1.11851	0.93763	1.01319	0.997503	1.00652	0.967345	1.05749	1.37493	0.545692	1.0287	1.03355	1.06769	0.991834	0.92367	1.11394	1.10131	1.18958	1.00451	0.877832	1.14499	1.03448	0.970737	1.01939	1.16009
201	chr1	113064714	113646617	1.00451	1.10153	1.36574	1.02973	1.01238	1.65914	1.10065	0.589017	1.16474	0.748862	0.9687	0.962809	0.982652	0.564396	0.688115	0.978827	1.16556	0.907738	1.02521	1.00461	1.13883	0.956571	1.11851	0.93763	1.01319	0.997503	1.00652	0.656784	1.05749	1.37493	0.545692	1.0287	1.03355	1.06769	0.991834	0.92367	1.11394	1.10131	1.18958	1.00451	0.877832	1.14499	1.03448	0.970737	1.01939	1.16009
202	chr1	113646618	114246719	1.00451	1.10153	1.08069	1.02973	1.01238	1.16824	1.10065	1.08665	1.16474	0.748862	1.20202	0.962809	0.982652	1.01654	0.688115	0.978827	1.16556	0.907738	1.02521	1.00461	1.13883	0.956571	1.11851	1.22471	1.01319	0.997503	1.00652	0.656784	1.05749	1.37493	1.00763	1.0287	1.03355	1.06769	0.991834	0.92367	1.11394	1.10131	1.18958	1.00451	0.877832	1.14499	1.03448	0.970737	1.01939	1.16009
203	chr1	114246720	114775197	1.00451	1.10153	1.08069	1.02973	1.01238	1.16824	1.10065	1.08665	1.16474	0.748862	1.20202	0.962809	0.982652	1.01654	0.688115	0.978827	1.16556	0.907738	1.02521	1.00461	1.13883	0.956571	1.11851	1.22471	1.01319	0.997503	1.00652	0.656784	1.05749	1.37493	1.00763	1.0287	1.03355	1.06769	0.991834	0.92367	1.11394	1.10131	1.18958	1.00451	0.877832	1.14499	1.03448	0.970737	1.01939	1.16009
204	chr1	114775198	115369574	1.00451	1.10153	1.08069	1.02973	1.01238	1.16824	1.10065	1.08665	1.16474	0.748862	1.20202	0.962809	0.982652	1.01654	0.688115	0.978827	1.16556	0.907738	1.02521	1.00461	1.13883	0.956571	1.11851	1.22471	1.01319	0.997503	1.00652	1.03241	1.05749	1.37493	1.00763	1.0287	1.03355	1.06769	0.991834	0.92367	1.11394	1.10131	1.18958	1.00451	0.877832	1.14499	1.03448	0.970737	1.01939	1.16009
205	chr1	115369575	115913808	1.00451	1.10153	1.08069	1.02973	1.01238	1.16824	1.10065	1.08665	0.98906	0.748862	1.20202	0.962809	0.982652	1.01654	0.688115	0.978827	1.16556	0.907738	1.02521	1.00461	1.13883	0.956571	1.11851	1.22471	1.01319	0.997503	1.00652	1.03241	1.05749	1.37493	1.00763	1.0287	1.03355	1.06769	0.991834	0.92367	1.11394	1.10131	1.18958	1.00451	0.877832	1.14499	1.03448	0.970737	1.01939	1.16009
206	chr1	115913809	116452002	1.00451	1.10153	1.08069	1.02973	1.01238	1.16824	1.10065	1.08665	0.98906	1.02994	1.20202	0.962809	0.982652	1.01654	0.688115	0.978827	1.16556	0.907738	1.02521	1.00461	1.13883	0.956571	1.11851	1.22471	1.01319	0.997503	1.00652	1.03241	1.05749	1.37493	1.00763	1.0287	1.03355	1.06769	0.991834	0.92367	1.11394	1.10131	1.18958	1.00451	0.877832	1.14499	1.03448	0.970737	1.01939	1.16009
207	chr1	116452003	117008723	1.00451	1.10153	1.08069	1.02973	1.01238	1.16824	1.10065	1.08665	0.98906	1.02994	1.20202	0.962809	0.982652	1.01654	0.688115	0.978827	1.16556	0.907738	1.02521	1.00461	1.13883	0.956571	1.11851	1.22471	1.01319	0.997503	1.00652	1.03241	1.05749	1.37493	1.00763	1.0287	1.03355	1.06769	0.991834	0.92367	1.11394	1.10131	1.18958	1.00451	0.877832	1.14499	1.03448	0.970737	1.01939	1.16009
208	chr1	117008724	117543074	1.00451	1.10153	1.08069	1.02973	1.01238	1.16824	1.10065	1.08665	0.98906	1.02994	1.20202	0.962809	0.982652	1.01654	0.688115	0.978827	1.16556	0.907738	1.02521	1.00461	1.13883	0.956571	1.11851	1.22471	1.01319	0.997503	1.00652	1.03241	1.05749	1.37493	1.00763	1.0287	1.03355	1.06769	0.991834	0.92367	1.11394	1.10131	1.18958	1.00451	0.877832	1.14499	1.03448	0.970737	1.01939	1.16009
209	chr1	117543075	118119076	1.00451	1.10153	1.08069	1.02973	1.01238	1.16824	1.10065	1.08665	0.98906	1.02994	1.20202	0.962809	0.982652	1.01654	0.688115	0.978827	1.16556	0.907738	1.02521	1.00461	1.13883	0.956571	1.11851	1.22471	1.01319	0.997503	1.00652	1.03241	1.05749	1.37493	1.00763	1.0287	1.03355	1.06769	0.991834	0.92367	1.11394	1.10131	1.18958	1.00451	0.877832	1.14499	1.03448	0.970737	1.01939	1.16009
210	chr1	118119077	118650750	1.00451	1.10153	1.08069	1.02973	1.01238	1.16824	1.10065	1.08665	0.98906	1.02994	1.20202	0.962809	0.982652	1.01654	0.688115	0.978827	1.16556	0.907738	1.02521	1.00461	1.13883	0.956571	1.11851	1.22471	1.01319	0.997503	1.00652	1.03241	1.05749	1.37493	1.00763	1.0287	1.03355	1.06769	0.991834	0.92367	1.11394	1.10131	1.18958	1.00451	0.877832	1.14499	1.03448	0.970737	1.01939	1.16009
211	chr1	118650751	119235421	1.00451	1.10153	1.08069	1.02973	1.01238	1.16824	1.10065	1.08665	0.98906	1.02994	1.20202	0.962809	0.982652	1.01654	0.688115	0.978827	1.16556	0.907738	1.02521	1.00461	1.13883	0.956571	1.11851	1.22471	1.01319	0.997503	1.00652	1.03241	1.05749	1.37493	1.00763	1.0287	1.03355	1.06769	0.991834	0.92367	1.11394	1.10131	1.18958	1.00451	0.877832	1.14499	1.03448	0.970737	1.01939	1.16009
212	chr1	119235422	119819469	1.00451	1.10153	1.08069	1.02973	1.01238	1.16824	1.10065	1.08665	0.98906	1.02994	1.20202	0.962809	0.982652	1.01654	0.688115	0.978827	1.16556	0.907738	1.02521	1.00461	1.13883	0.956571	1.11851	1.22471	1.01319	0.997503	1.00652	1.03241	1.05749	1.37493	1.00763	1.0287	1.03355	1.06769	0.991834	0.92367	1.11394	1.10131	1.18958	1.00451	0.877832	1.14499	1.03448	0.970737	1.01939	1.16009
213	chr1	119819470	120368499	1.00451	1.10153	1.08069	1.02973	1.01238	1.16824	1.10065	1.08665	0.98906	1.02994	1.20202	0.962809	0.982652	1.01654	0.688115	0.978827	1.16556	0.907738	1.02521	1.00461	1.13883	0.956571	1.11851	1.22471	1.01319	0.997503	1.00652	1.03241	1.05749	1.37493	1.00763	1.0287	1.03355	1.06769	0.991834	0.92367	1.11394	1.10131	1.18958	1.00451	0.877832	1.14499	1.03448	0.970737	1.01939	1.16009
214	chr1	120368500	120677830	1.00451	1.10153	1.08069	1.02973	1.01238	1.16824	1.10065	1.08665	0.98906	1.02994	1.20202	0.962809	0.982652	1.01654	0.688115	0.978827	1.16556	0.907738	1.02521	1.00461	1.13883	0.956571	1.11851	1.22471	1.01319	0.997503	1.00652	1.03241	1.05749	1.37493	1.00763	1.0287	1.03355	1.06769	0.991834	0.92367	1.11394	1.10131	1.18958	1.00451	0.877832	1.14499	1.03448	0.970737	1.01939	1.16009
215	chr1	120677831	121247629	1.00451	1.10153	1.08069	1.02973	1.01238	1.16824	1.10065	1.08665	0.98906	1.15062	1.20202	0.962809	0.982652	1.01654	0.688115	0.978827	1.16556	0.907738	1.02521	1.00461	1.13883	0.956571	1.11851	1.22471	1.01319	0.997503	1.00652	1.03241	1.05749	1.37493	1.00763	1.0287	1.03355	1.38625	0.991834	0.92367	1.11394	1.10131	1.18958	1.00451	0.877832	1.14499	1.03448	0.970737	1.01939	1.16009
216	chr1	121247630	121484735	1.00451	1.10153	1.08069	1.02973	1.01238	1.16824	0.713552	1.08665	0.98906	1.15062	1.20202	0.962809	0.982652	1.01654	1.40537	1.47418	1.16556	1.33256	1.02521	1.00461	1.13883	0.956571	1.11851	1.22471	1.01319	0.997503	1.00652	1.03241	1.05749	1.37493	1.00763	1.0287	1.03355	1.38625	0.991834	0.92367	1.11394	1.10131	1.18958	1.00451	0.877832	1.14499	1.03448	0.970737	1.01939	1.16009
217	chr1	121484736	142551914	1.00451	1.10153	1.08069	1.02973	1.01238	1.16824	0.713552	1.08665	0.98906	1.15062	1.20202	0.962809	0.982652	1.01654	1.40537	1.47418	1.16556	1.33256	1.02521	1.00461	1.13883	0.956571	1.11851	1.22471	1.01319	0.997503	1.00652	1.03241	1.05749	1.37493	1.00763	1.0287	1.03355	1.38625	0.991834	0.92367	1.11394	1.10131	1.18958	1.00451	0.877832	1.14499	1.03448	0.970737	1.01939	1.16009
218	chr1	142551915	142803208	1.00451	1.10153	1.08069	1.02973	1.01238	1.16824	1.0753	1.08665	0.98906	1.15062	1.20202	0.962809	0.982652	1.01654	1.40537	1.01857	1.16556	1.33256	1.02521	1.00461	1.13883	0.956571	1.11851	1.22471	1.01319	0.997503	1.00652	1.03241	1.05749	1.37493	1.00763	1.0287	1.03355	1.06332	0.991834	0.92367	1.11394	1.10131	1.18958	1.00451	0.877832	1.14499	1.03448	0.970737	1.01939	1.16009
219	chr1	142803209	142955990	1.00451	1.10153	1.08069	1.02973	1.01238	1.16824	1.0753	1.08665	0.98906	1.15062	1.20202	0.962809	0.982652	1.01654	1.40537	1.01857	1.16556	1.33256	1.02521	1.00461	1.13883	0.956571	1.11851	1.22471	1.01319	0.997503	1.00652	1.03241	1.05749	1.37493	1.00763	1.0287	1.03355	1.06332	0.991834	0.92367	1.11394	1.10131	1.18958	1.00451	0.877832	0.936131	1.03448	0.970737	1.01939	1.16009
220	chr1	142955991	143394308	1.00451	1.10153	1.08069	1.02973	1.01238	1.16824	1.0753	1.08665	0.98906	1.15062	1.20202	0.962809	0.982652	1.01654	1.40537	1.01857	1.16556	0.949424	1.02521	1.00461	1.13883	0.956571	1.11851	1.22471	1.01319	0.997503	1.00652	1.03241	1.05749	1.37493	1.00763	1.0287	1.03355	1.06332	0.991834	0.92367	1.11394	1.10131	1.18958	1.00451	0.877832	0.936131	1.03448	0.970737	1.01939	1.16009
221	chr1	143394309	143919182	1.00451	1.10153	1.08069	1.02973	1.01238	1.16824	1.0753	1.08665	0.98906	1.15062	1.20202	0.962809	0.982652	1.01654	1.40537	1.01857	1.16556	0.949424	1.02521	1.00461	1.13883	0.956571	1.11851	1.22471	1.01319	0.997503	1.00652	1.03241	1.05749	1.37493	1.00763	1.0287	1.03355	1.06332	0.991834	0.92367	1.11394	1.10131	1.18958	1.00451	0.877832	0.936131	1.03448	0.970737	1.01939	1.16009
222	chr1	143919183	144381013	1.00451	1.10153	1.08069	1.02973	1.01238	1.16824	0.915486	1.08665	0.98906	1.15062	1.20202	0.962809	0.982652	1.01654	0.768204	1.01857	1.16556	0.949424	1.02521	1.00461	1.13883	0.956571	1.11851	1.22471	1.01319	0.997503	1.00652	1.03241	1.05749	1.37493	1.00763	1.0287	1.03355	1.06332	0.991834	0.92367	1.11394	1.10131	1.18958	1.00451	0.877832	0.936131	1.03448	0.970737	1.01939	1.16009
223	chr1	144381014	144891764	1.00451	1.10153	1.08069	1.02973	1.01238	1.16824	0.915486	1.08665	0.98906	1.15062	1.20202	0.962809	0.982652	1.01654	0.768204	1.01857	1.16556	0.949424	1.02521	1.00461	1.13883	0.956571	1.11851	1.22471	1.01319	0.997503	1.00652	1.03241	1.05749	1.37493	1.00763	1.0287	1.03355	1.06332	0.991834	0.92367	1.11394	1.10131	1.18958	1.00451	0.877832	0.936131	1.03448	0.970737	1.01939	1.16009
224	chr1	144891765	145075864	1.00451	1.10153	1.08069	1.02973	1.01238	1.16824	0.915486	1.08665	0.98906	1.15062	1.20202	0.962809	0.982652	1.01654	0.768204	1.01857	1.16556	0.949424	1.02521	1.00461	1.13883	0.956571	1.11851	1.22471	1.01319	0.997503	1.00652	1.03241	1.05749	1.37493	1.00763	1.0287	1.03355	1.06332	0.991834	0.92367	1.11394	1.10131	1.18958	1.00451	0.877832	0.936131	1.03448	0.970737	1.01939	1.16009
225	chr1	145075865	145270683	1.00451	1.10153	1.08069	1.02973	1.01238	1.16824	0.915486	1.08665	0.98906	1.15062	1.20202	0.962809	0.982652	1.01654	0.768204	1.01857	1.16556	0.949424	1.02521	1.00461	1.13883	0.956571	1.11851	1.22471	1.01319	0.997503	1.00652	1.03241	1.05749	1.37493	1.00763	1.0287	1.03355	1.06332	0.991834	0.92367	1.11394	1.10131	1.18958	1.00451	0.877832	0.936131	1.03448	0.970737	1.01939	1.16009
226	chr1	145270684	145701590	1.00451	1.10153	1.08069	1.02973	1.01238	1.16824	0.915486	1.08665	0.98906	1.15062	1.20202	0.962809	0.982652	1.01654	0.768204	1.01857	1.16556	0.949424	1.02521	1.00461	1.13883	0.956571	1.11851	1.22471	1.01319	0.997503	1.00652	1.03241	1.05749	1.37493	1.00763	1.0287	1.03355	1.06332	0.991834	0.92367	1.11394	1.10131	1.18958	1.00451	0.877832	0.936131	1.03448	0.970737	1.01939	1.16009
227	chr1	145701591	146228446	1.00451	1.10153	1.08069	1.02973	1.01238	1.16824	0.915486	1.08665	0.98906	1.15062	1.20202	0.962809	0.982652	1.01654	0.768204	1.01857	1.16556	0.949424	1.02521	1.00461	1.13883	0.956571	1.11851	1.22471	1.01319	0.997503	1.00652	1.03241	1.05749	1.37493	1.00763	1.0287	1.03355	1.06332	0.991834	0.92367	1.11394	1.10131	1.18958	1.00451	0.877832	0.936131	1.03448	0.970737	1.01939	1.16009
228	chr1	146228447	146872036	1.00451	1.10153	1.08069	1.02973	1.01238	1.16824	1.05485	1.08665	0.98906	1.15062	1.20202	0.962809	0.982652	1.01654	0.768204	1.01857	1.16556	0.949424	1.02521	1.00461	1.13883	0.956571	1.11851	1.22471	1.01319	0.997503	1.00652	1.03241	1.05749	1.37493	1.00763	1.0287	1.03355	1.06332	0.991834	0.92367	1.11394	1.10131	1.18958	1.00451	0.877832	0.936131	1.03448	0.970737	1.01939	1.16009
229	chr1	146872037	147416456	1.00451	1.10153	1.08069	1.02973	1.01238	1.16824	1.05485	1.08665	0.98906	1.15062	1.20202	0.962809	0.982652	1.01654	0.768204	1.01857	1.16556	0.949424	1.02521	1.00461	1.13883	0.956571	1.11851	1.22471	1.01319	0.997503	1.00652	1.03241	1.05749	1.37493	1.00763	1.0287	1.03355	1.06332	0.991834	0.92367	1.11394	1.10131	1.18958	1.00451	0.877832	0.936131	1.03448	0.970737	1.01939	1.16009
230	chr1	147416457	147894833	1.00451	1.10153	1.08069	1.02973	1.01238	1.16824	1.05485	1.08665	0.98906	1.15062	1.20202	0.962809	0.982652	1.01654	0.768204	1.01857	1.16556	0.949424	1.02521	1.00461	1.13883	0.956571	1.11851	1.22471	1.01319	0.997503	1.00652	1.03241	1.05749	1.37493	1.00763	1.0287	1.03355	1.06332	0.991834	0.92367	1.11394	1.10131	1.18958	1.00451	0.877832	0.936131	1.03448	0.970737	1.01939	1.16009
231	chr1	147894834	148584795	1.00451	1.10153	1.08069	1.02973	1.01238	1.16824	1.05485	1.08665	0.98906	1.15062	1.20202	0.962809	0.982652	1.01654	0.768204	1.01857	1.16556	0.949424	1.02521	1.00461	1.13883	0.956571	1.11851	1.22471	1.01319	0.997503	1.00652	1.03241	1.05749	1.37493	1.00763	1.0287	1.03355	1.06332	0.991834	0.92367	1.11394	1.10131	1.18958	1.00451	0.877832	0.936131	1.03448	0.970737	1.01939	1.16009
232	chr1	148584796	148897381	1.00451	1.10153	1.08069	1.02973	1.01238	1.16824	1.05485	1.08665	0.98906	1.15062	1.20202	0.962809	0.982652	1.01654	0.768204	1.01857	1.16556	0.949424	1.02521	1.00461	1.13883	0.956571	1.11851	1.22471	1.01319	0.997503	1.00652	1.03241	1.05749	1.37493	1.00763	1.0287	1.03355	1.06332	0.991834	0.92367	1.11394	1.10131	1.18958	1.00451	0.877832	0.936131	1.03448	0.970737	1.01939	1.16009
233	chr1	148897382	149285620	1.00451	1.10153	1.08069	1.02973	1.01238	1.16824	1.05485	1.08665	0.98906	1.15062	1.20202	0.962809	0.982652	1.01654	0.768204	1.01857	1.16556	0.949424	1.02521	1.00461	1.13883	0.956571	1.11851	1.22471	1.01319	0.997503	1.00652	1.03241	1.05749	1.37493	1.00763	1.0287	1.03355	1.06332	0.991834	0.92367	1.11394	1.10131	1.18958	1.00451	0.877832	0.936131	1.03448	0.970737	1.01939	1.16009
234	chr1	149285621	149695848	1.00451	1.10153	1.08069	1.02973	1.01238	1.16824	1.05485	1.08665	0.98906	1.15062	1.20202	0.962809	0.982652	1.01654	0.768204	1.01857	1.16556	0.949424	1.02521	1.00461	1.13883	0.956571	1.11851	1.22471	1.01319	0.997503	1.00652	1.03241	1.05749	1.37493	1.00763	1.0287	1.03355	1.06332	0.991834	0.92367	1.11394	1.10131	1.18958	1.00451	0.877832	0.936131	1.03448	0.970737	1.01939	1.16009
235	chr1	149695849	150167229	1.00451	1.10153	1.08069	1.02973	1.01238	1.16824	0.843243	1.08665	0.98906	1.15062	1.20202	0.962809	0.982652	1.01654	0.768204	1.01857	1.16556	0.949424	1.02521	1.00461	1.13883	0.956571	1.11851	1.22471	1.01319	0.997503	1.00652	1.03241	1.05749	1.37493	1.00763	1.0287	1.03355	1.06332	0.991834	0.92367	1.11394	1.10131	1.18958	1.00451	0.877832	0.936131	1.03448	0.970737	1.01939	1.16009
236	chr1	150167230	150733233	1.00451	1.10153	1.08069	1.02973	1.01238	1.16824	0.843243	1.08665	0.98906	1.15062	1.20202	0.962809	0.982652	1.01654	0.768204	1.01857	1.16556	0.949424	1.02521	1.00461	1.13883	0.956571	1.11851	1.22471	1.01319	0.997503	1.00652	1.03241	1.05749	1.37493	1.00763	1.0287	1.03355	1.06332	0.991834	0.92367	1.11394	1.10131	1.18958	1.00451	0.877832	0.936131	1.03448	0.970737	1.01939	1.16009
237	chr1	150733234	151288955	1.00451	1.10153	1.08069	1.02973	1.01238	1.16824	0.843243	1.08665	0.98906	1.15062	1.20202	0.962809	0.982652	1.01654	0.768204	1.01857	1.16556	0.949424	1.02521	1.00461	1.13883	0.956571	1.11851	1.22471	1.01319	0.997503	1.00652	1.03241	1.05749	1.37493	1.00763	1.0287	1.03355	1.06332	0.991834	0.757524	1.11394	1.10131	1.18958	1.00451	0.877832	0.936131	1.03448	0.970737	1.01939	1.16009
238	chr1	151288956	151831754	1.00451	1.10153	1.08069	1.02973	1.01238	1.16824	0.843243	1.08665	0.98906	1.15062	1.20202	0.962809	0.982652	1.01654	0.768204	1.01857	1.16556	0.949424	1.02521	1.00461	1.13883	0.956571	1.11851	1.22471	1.01319	0.997503	1.00652	1.03241	1.05749	1.37493	1.00763	1.0287	1.03355	1.06332	0.991834	0.757524	1.11394	1.10131	1.18958	1.00451	0.877832	0.936131	1.03448	0.970737	1.01939	1.16009
239	chr1	151831755	152420834	1.00451	1.10153	1.08069	1.02973	1.01238	1.16824	0.843243	1.08665	0.98906	1.15062	1.20202	0.962809	0.982652	1.01654	0.768204	1.01857	1.16556	0.949424	1.02521	1.00461	1.13883	0.956571	1.11851	1.22471	1.01319	0.997503	1.00652	1.03241	1.05749	1.37493	1.00763	1.0287	1.03355	1.06332	0.991834	0.757524	1.11394	1.10131	1.18958	1.00451	0.877832	0.936131	1.03448	0.970737	1.01939	1.16009
240	chr1	152420835	153003251	1.00451	1.10153	1.08069	1.02973	1.01238	1.16824	0.843243	1.08665	0.98906	1.4229	1.00602	0.962809	0.982652	1.01654	0.768204	1.01857	0.855474	0.949424	1.02521	1.00461	1.13883	0.956571	1.11851	1.22471	1.01319	0.997503	1.00652	1.03241	1.05749	1.37493	1.00763	1.0287	1.03355	1.06332	0.991834	0.757524	1.11394	1.10131	1.18958	1.00451	0.877832	0.936131	1.03448	0.970737	1.01939	1.16009
241	chr1	153003252	153558846	1.00451	1.10153	1.08069	1.02973	1.01238	1.16824	0.843243	1.08665	0.98906	1.4229	1.00602	0.962809	0.982652	1.01654	0.768204	1.01857	0.855474	0.949424	1.02521	1.00461	1.13883	0.956571	1.11851	1.22471	1.01319	0.997503	1.00652	1.03241	1.05749	1.37493	1.00763	1.0287	1.03355	1.06332	0.991834	0.757524	1.11394	1.10131	1.18958	1.00451	0.877832	0.936131	1.03448	0.970737	1.01939	1.16009
242	chr1	153558847	154128572	1.00451	1.10153	1.08069	1.02973	1.01238	1.16824	0.843243	1.08665	0.98906	1.4229	1.00602	0.962809	0.982652	1.01654	0.768204	1.01857	0.855474	0.949424	1.02521	1.00461	1.13883	0.956571	1.11851	1.22471	1.01319	0.997503	1.00652	1.03241	1.05749	1.37493	1.00763	1.0287	1.03355	1.06332	0.991834	0.757524	1.11394	1.10131	1.18958	1.00451	0.877832	0.936131	1.03448	0.970737	1.01939	1.16009
243	chr1	154128573	154672094	1.00451	1.10153	1.08069	1.02973	1.01238	1.16824	0.843243	1.08665	0.98906	1.4229	1.00602	0.962809	0.982652	1.01654	0.768204	1.01857	0.855474	0.949424	1.02521	1.00461	1.13883	0.956571	1.11851	1.22471	1.01319	0.997503	1.00652	1.03241	1.05749	1.37493	1.00763	1.0287	1.03355	1.06332	0.991834	0.757524	1.11394	1.10131	1.18958	1.00451	0.877832	0.936131	1.03448	0.970737	1.01939	1.16009
244	chr1	154672095	155179058	1.00451	1.10153	1.08069	1.02973	1.01238	1.16824	0.843243	1.08665	0.98906	1.4229	1.00602	0.962809	0.982652	1.01654	0.768204	1.01857	0.855474	0.949424	1.02521	1.00461	1.13883	0.956571	1.11851	1.22471	1.01319	0.997503	1.00652	1.03241	1.05749	1.37493	1.00763	1.0287	1.03355	1.06332	0.991834	0.757524	1.11394	1.10131	1.18958	1.00451	0.877832	0.936131	1.03448	0.970737	1.01939	1.16009
245	chr1	155179059	155732175	1.00451	1.10153	1.08069	1.02973	1.01238	1.16824	0.843243	1.08665	0.98906	1.4229	1.00602	0.962809	0.982652	1.01654	0.768204	1.01857	0.855474	0.949424	1.02521	1.00461	1.13883	0.956571	1.11851	1.22471	1.01319	0.997503	1.00652	1.03241	1.05749	1.37493	1.00763	1.0287	1.03355	1.06332	0.991834	0.757524	1.11394	1.10131	1.18958	1.00451	0.877832	0.936131	1.03448	0.970737	1.01939	1.16009
246	chr1	155732176	156290015	1.00451	1.10153	1.08069	1.02973	1.01238	1.16824	0.843243	1.08665	0.98906	1.4229	1.00602	0.962809	0.982652	1.01654	0.768204	1.01857	0.855474	0.949424	1.02521	1.00461	1.13883	0.956571	1.11851	1.22471	1.01319	0.997503	1.00652	1.03241	1.05749	1.37493	1.00763	1.0287	1.03355	1.06332	0.991834	0.757524	1.11394	1.10131	1.18958	1.00451	0.877832	0.936131	1.03448	0.970737	1.01939	1.16009
247	chr1	156290016	156834759	1.00451	1.10153	1.08069	1.02973	1.01238	1.16824	1.09889	1.08665	0.98906	1.4229	1.00602	0.962809	0.982652	1.01654	0.768204	1.01857	0.855474	0.949424	1.02521	1.00461	1.13883	0.956571	1.11851	1.22471	1.01319	0.997503	1.00652	1.03241	1.05749	1.37493	1.00763	1.0287	1.03355	1.06332	0.991834	0.757524	1.11394	1.10131	1.18958	1.00451	0.877832	0.936131	1.03448	0.970737	1.01939	1.16009
248	chr1	156834760	157371633	1.00451	1.10153	1.08069	1.02973	1.01238	1.16824	1.09889	1.08665	0.98906	1.4229	1.00602	0.962809	0.982652	1.01654	0.768204	1.01857	0.855474	0.949424	1.02521	1.00461	1.13883	0.956571	1.11851	1.22471	1.01319	0.997503	1.00652	1.03241	1.05749	1.37493	1.00763	1.0287	1.03355	1.06332	0.991834	0.757524	1.11394	1.10131	1.18958	1.00451	0.877832	0.936131	1.03448	0.970737	1.01939	1.16009
249	chr1	157371634	157952229	1.00451	1.10153	1.08069	1.02973	1.01238	1.16824	1.09889	1.08665	0.98906	1.4229	1.00602	0.962809	0.982652	1.01654	0.768204	1.01857	0.855474	0.949424	1.02521	1.00461	1.13883	0.956571	1.11851	1.22471	1.01319	0.997503	1.00652	1.03241	1.05749	1.71738	1.00763	1.0287	1.03355	1.06332	0.991834	0.757524	1.11394	1.10131	1.18958	1.00451	0.877832	0.936131	1.03448	0.970737	1.01939	1.16009
250	chr1	157952230	158546027	1.00451	1.10153	1.08069	1.02973	1.01238	1.16824	1.09889	1.08665	0.98906	1.4229	1.00602	0.498277	0.982652	1.01654	0.768204	1.01857	0.855474	0.949424	1.02521	1.00461	1.13883	0.956571	1.11851	1.22471	1.01319	0.997503	1.00652	1.03241	1.05749	1.71738	1.00763	1.0287	1.03355	1.06332	0.991834	0.757524	1.11394	1.10131	1.18958	1.00451	0.877832	0.936131	1.03448	0.970737	1.01939	1.16009
251	chr1	158546028	159163913	1.00451	1.10153	1.08069	1.02973	1.01238	1.16824	1.09889	1.08665	0.98906	1.4229	1.00602	0.498277	0.982652	1.01654	0.768204	1.01857	0.855474	0.949424	1.02521	1.00461	1.13883	0.956571	1.11851	1.22471	1.01319	0.997503	1.00652	1.03241	1.05749	1.71738	1.00763	1.0287	1.03355	1.06332	0.991834	0.757524	1.11394	1.10131	1.18958	1.00451	0.877832	0.936131	1.03448	0.970737	1.01939	1.16009
252	chr1	159163914	159772952	1.00451	1.10153	1.08069	1.02973	1.01238	1.16824	1.09889	1.08665	0.98906	1.4229	1.00602	0.498277	0.982652	1.01654	0.768204	1.01857	0.855474	0.949424	1.02521	1.00461	1.13883	0.956571	1.11851	1.35283	1.01319	0.997503	1.00652	1.03241	1.05749	1.71738	1.00763	1.0287	1.03355	1.06332	0.991834	0.757524	1.11394	1.10131	1.18958	1.00451	0.877832	0.936131	1.03448	0.970737	1.01939	1.16009
253	chr1	159772953	160280508	1.00451	1.10153	1.08069	1.02973	1.01238	1.16824	1.09889	1.08665	0.98906	1.4229	1.00602	0.998901	0.982652	1.01654	0.768204	1.01857	0.855474	0.949424	1.02521	1.00461	1.13883	0.956571	1.11851	1.35283	1.01319	0.997503	1.00652	1.03241	1.05749	1.71738	1.00763	1.0287	1.03355	1.06332	0.991834	0.757524	1.11394	1.10131	1.18958	1.00451	0.877832	0.936131	1.03448	0.970737	1.01939	1.16009
254	chr1	160280509	160833078	1.00451	1.10153	1.08069	1.02973	1.01238	1.16824	1.09889	1.08665	0.98906	1.4229	1.00602	0.998901	0.982652	1.01654	0.768204	1.01857	0.855474	0.949424	1.02521	1.00461	1.13883	0.956571	1.11851	1.35283	1.01319	0.997503	1.00652	1.03241	1.05749	1.71738	1.00763	1.0287	1.03355	1.06332	0.991834	0.757524	1.11394	1.10131	1.18958	1.00451	0.877832	0.936131	1.03448	0.970737	1.01939	1.16009
255	chr1	160833079	161414670	1.00451	1.10153	1.08069	1.02973	1.01238	1.16824	1.09889	1.08665	0.98906	1.1827	1.00602	0.998901	0.982652	1.01654	0.768204	1.01857	0.855474	0.949424	1.02521	1.00461	1.13883	0.956571	1.11851	1.35283	1.01319	0.997503	1.00652	1.03241	1.05749	1.32339	1.00763	1.0287	1.03355	1.06332	0.991834	0.757524	1.11394	1.10131	1.18958	1.00451	0.877832	0.936131	1.03448	0.970737	1.01939	1.16009
256	chr1	161414671	161885696	1.00451	1.10153	1.08069	1.02973	1.01238	1.16824	1.09889	1.08665	0.98906	1.1827	1.00602	0.998901	0.982652	1.01654	0.768204	1.01857	0.855474	0.949424	1.02521	1.00461	1.13883	0.956571	1.11851	1.35283	1.01319	0.997503	1.00652	1.03241	1.05749	1.32339	1.00763	1.0287	1.03355	1.06332	0.991834	0.757524	1.11394	1.10131	1.18958	1.00451	0.877832	0.936131	1.03448	0.970737	1.01939	1.16009
257	chr1	161885697	162431275	1.00451	1.10153	1.08069	1.02973	1.01238	1.16824	1.09889	1.08665	0.98906	1.1827	1.00602	0.998901	0.982652	1.01654	0.768204	1.01857	0.855474	0.949424	1.02521	1.00461	1.13883	0.956571	1.11851	1.35283	1.01319	0.997503	1.00652	1.03241	1.05749	1.32339	1.00763	1.0287	1.03355	1.06332	0.991834	0.757524	1.11394	1.10131	1.18958	1.00451	0.877832	1.25307	1.03448	0.970737	1.01939	1.16009
258	chr1	162431276	163004459	1.00451	1.10153	1.08069	1.02973	1.01238	1.16824	1.09889	1.08665	0.98906	1.1827	0.638011	0.998901	0.982652	1.01654	0.768204	1.01857	0.855474	0.949424	1.02521	1.00461	1.13883	0.956571	1.11851	1.35283	1.01319	0.997503	1.00652	1.03241	1.42775	1.32339	1.00763	1.0287	1.03355	1.06332	0.991834	1.02235	1.11394	1.10131	1.18958	1.00451	0.877832	1.25307	1.03448	0.970737	1.01939	1.16009
259	chr1	163004460	163588000	1.00451	1.10153	1.08069	1.02973	1.01238	1.16824	1.09889	1.08665	0.98906	1.1827	0.638011	0.998901	0.982652	1.01654	0.768204	1.01857	0.855474	0.949424	1.02521	1.00461	1.13883	0.956571	1.11851	1.35283	1.01319	0.997503	1.00652	1.03241	1.42775	1.32339	1.00763	1.0287	1.03355	1.06332	0.991834	1.02235	1.11394	1.10131	1.18958	1.00451	0.877832	1.25307	1.03448	0.970737	1.01939	1.16009
260	chr1	163588001	164196895	1.00451	1.10153	1.08069	1.02973	1.01238	1.16824	1.09889	1.08665	0.98906	1.1827	0.638011	0.998901	0.982652	1.01654	0.919707	1.01857	0.855474	0.949424	1.02521	1.00461	1.13883	0.956571	1.11851	1.35283	1.01319	0.997503	1.00652	1.03241	1.42775	1.32339	1.00763	1.16056	1.03355	1.06332	0.991834	1.02235	1.11394	1.10131	1.18958	1.00451	0.877832	1.25307	1.03448	0.970737	1.01939	1.16009
261	chr1	164196896	164775077	1.00451	1.10153	1.08069	1.02973	1.01238	1.16824	1.09889	1.08665	0.98906	1.1827	0.638011	0.998901	0.982652	1.01654	0.919707	1.01857	0.855474	0.949424	1.02521	1.00461	1.13883	0.956571	1.11851	1.35283	1.01319	0.997503	1.00652	1.03241	1.42775	1.32339	1.00763	1.16056	1.03355	1.06332	0.991834	1.02235	1.11394	1.10131	1.18958	1.00451	0.877832	1.25307	1.03448	0.970737	1.01939	1.16009
262	chr1	164775078	165315421	1.00451	1.10153	1.08069	1.02973	1.01238	1.16824	1.09889	1.08665	0.98906	1.1827	0.638011	0.998901	0.982652	1.01654	0.919707	1.01857	0.855474	0.949424	1.02521	1.00461	1.13883	0.956571	1.11851	1.35283	1.01319	0.997503	1.00652	1.03241	1.0612	1.32339	1.00763	1.16056	1.03355	1.06332	0.991834	1.02235	1.11394	1.10131	1.18958	1.00451	0.877832	1.25307	1.03448	0.970737	1.01939	1.16009
263	chr1	165315422	165875418	1.00451	1.10153	1.08069	1.02973	1.01238	1.16824	1.09889	1.08665	0.98906	1.1827	0.892169	0.998901	0.982652	1.01654	0.919707	1.01857	0.855474	0.949424	1.02521	1.00461	1.13883	0.956571	1.11851	1.35283	1.01319	0.997503	1.00652	1.03241	1.0612	1.32339	1.00763	1.16056	1.03355	1.06332	0.991834	1.02235	1.11394	1.10131	0.852996	1.00451	0.877832	0.980689	1.03448	0.970737	1.01939	1.16009
264	chr1	165875419	166483608	1.00451	1.10153	1.08069	1.02973	1.01238	1.16824	1.09889	1.08665	0.98906	1.1827	0.892169	0.998901	0.982652	1.01654	0.919707	1.01857	0.855474	0.949424	1.02521	1.00461	1.13883	0.956571	1.11851	1.35283	1.01319	0.997503	1.00652	1.03241	1.0612	1.32339	1.00763	1.16056	1.03355	1.06332	0.991834	0.850696	1.11394	1.10131	0.852996	1.00451	0.877832	0.980689	1.03448	0.970737	1.01939	1.16009
265	chr1	166483609	167078826	1.00451	1.10153	1.08069	1.02973	1.01238	1.16824	1.09889	1.08665	0.98906	1.1827	0.892169	0.998901	0.982652	1.01654	0.919707	1.01857	0.855474	0.949424	1.02521	1.00461	1.13883	0.956571	1.11851	1.35283	1.01319	0.997503	1.00652	1.03241	1.0612	1.32339	1.00763	1.16056	1.03355	1.06332	0.991834	0.850696	1.11394	1.10131	0.852996	1.00451	0.877832	0.980689	1.03448	0.970737	1.01939	1.16009
266	chr1	167078827	167647336	1.00451	1.10153	1.08069	1.02973	1.01238	1.16824	1.09889	1.08665	0.98906	1.1827	0.892169	0.998901	0.982652	1.01654	0.919707	1.01857	0.855474	0.949424	1.02521	1.00461	1.13883	0.956571	1.11851	1.35283	1.01319	0.997503	1.00652	1.03241	1.0612	1.32339	1.00763	1.16056	1.03355	1.06332	0.991834	0.850696	1.11394	1.10131	0.852996	1.00451	0.877832	0.980689	1.03448	0.970737	1.01939	1.16009
267	chr1	167647337	168224832	1.00451	1.10153	1.08069	1.02973	1.01238	1.16824	1.09889	1.08665	0.98906	1.1827	0.892169	0.998901	0.982652	1.01654	0.919707	1.01857	0.855474	0.949424	1.02521	1.00461	1.13883	0.956571	1.11851	1.35283	1.01319	0.997503	1.00652	1.03241	1.0612	1.32339	1.00763	1.16056	1.03355	1.06332	0.991834	0.850696	1.11394	1.10131	0.852996	1.00451	0.877832	0.980689	1.03448	0.970737	1.01939	1.16009
268	chr1	168224833	168776108	1.00451	1.10153	1.08069	1.02973	1.01238	1.16824	1.09889	1.08665	0.98906	1.1827	0.892169	0.998901	0.982652	1.01654	0.919707	1.01857	0.855474	0.949424	1.02521	1.00461	1.13883	0.956571	1.11851	1.35283	1.01319	0.997503	1.00652	1.03241	1.0612	1.32339	1.00763	1.16056	1.03355	1.06332	0.991834	0.850696	1.11394	1.10131	0.852996	1.00451	0.877832	0.980689	1.03448	0.970737	1.01939	1.16009
269	chr1	168776109	169361735	1.00451	1.10153	0.970154	1.02973	1.01238	1.16824	1.09889	1.08665	0.98906	1.1827	0.892169	0.998901	0.982652	1.01654	0.919707	1.01857	0.855474	0.949424	1.02521	1.00461	1.13883	0.956571	1.11851	1.35283	1.01319	0.997503	1.00652	1.03241	1.0612	1.32339	1.00763	1.16056	1.03355	1.06332	0.991834	0.850696	1.11394	1.10131	0.852996	1.00451	0.877832	0.980689	1.03448	0.970737	1.01939	1.16009
270	chr1	169361736	169953516	1.00451	1.10153	0.970154	1.02973	1.01238	1.16824	1.09889	1.08665	0.98906	1.1827	0.892169	0.998901	0.982652	1.01654	0.919707	1.01857	0.855474	0.949424	1.02521	1.00461	1.13883	0.956571	1.11851	1.35283	1.01319	0.997503	1.00652	1.03241	1.0612	1.32339	1.00763	1.16056	1.03355	1.06332	0.991834	0.850696	1.11394	1.10131	0.852996	1.00451	0.877832	0.980689	1.03448	0.970737	1.01939	1.16009
271	chr1	169953517	170550450	1.00451	1.10153	0.970154	1.02973	1.01238	1.16824	1.09889	1.08665	0.98906	1.1827	0.892169	0.998901	0.982652	1.01654	0.919707	1.01857	0.855474	0.949424	1.02521	1.00461	1.13883	0.956571	1.11851	1.35283	1.01319	0.997503	1.00652	1.03241	1.0612	1.32339	1.00763	1.16056	1.03355	1.06332	0.991834	0.850696	1.11394	1.10131	0.852996	1.00451	0.877832	0.980689	1.03448	0.970737	1.01939	1.16009
272	chr1	170550451	171130283	1.00451	1.10153	0.970154	1.02973	1.01238	1.16824	1.09889	1.08665	0.98906	1.1827	0.892169	0.998901	0.982652	1.01654	0.919707	1.01857	0.855474	0.949424	1.02521	1.00461	1.13883	0.956571	1.11851	1.35283	1.01319	0.997503	1.00652	1.03241	1.0612	1.32339	1.00763	1.16056	1.03355	1.06332	0.991834	0.850696	1.11394	1.10131	0.852996	1.00451	0.877832	0.980689	1.03448	0.970737	1.01939	1.16009
273	chr1	171130284	171709197	1.00451	1.10153	0.970154	1.02973	1.01238	1.16824	1.09889	1.08665	0.98906	1.1827	0.892169	0.998901	0.982652	1.01654	0.919707	1.01857	0.855474	0.949424	1.02521	1.00461	1.13883	0.956571	1.11851	1.35283	1.01319	0.997503	1.00652	1.03241	1.0612	1.32339	1.00763	1.16056	1.03355	1.06332	0.991834	0.850696	1.11394	1.10131	0.852996	1.00451	0.877832	0.980689	1.03448	0.970737	1.01939	1.16009
274	chr1	171709198	172294041	1.00451	1.10153	0.970154	1.02973	1.01238	1.16824	1.09889	1.08665	0.98906	1.1827	0.892169	0.998901	0.982652	1.01654	0.919707	1.01857	0.855474	0.949424	1.02521	1.00461	1.13883	0.956571	1.11851	1.35283	1.01319	0.997503	1.00652	1.03241	1.0612	1.32339	0.868142	1.16056	1.03355	1.06332	0.991834	0.850696	1.11394	1.10131	0.852996	1.00451	0.877832	0.980689	1.03448	0.970737	1.01939	1.16009
275	chr1	172294042	172861202	1.00451	1.10153	0.970154	1.02973	1.01238	1.16824	1.09889	1.08665	0.98906	1.1827	0.892169	0.998901	0.982652	1.01654	0.919707	1.01857	0.855474	0.949424	1.02521	1.00461	1.13883	0.956571	1.11851	1.35283	1.01319	0.997503	1.00652	1.03241	1.0612	1.32339	0.868142	1.16056	1.03355	1.06332	0.991834	0.850696	1.11394	1.10131	0.852996	1.00451	0.877832	0.980689	1.03448	0.970737	1.01939	1.16009
276	chr1	172861203	173429987	1.00451	1.10153	0.970154	1.02973	1.01238	1.16824	1.09889	1.08665	0.98906	1.1827	0.892169	0.998901	0.982652	1.01654	0.919707	1.01857	0.855474	0.949424	1.02521	1.00461	1.13883	0.956571	1.11851	1.35283	1.01319	0.997503	1.00652	1.03241	1.0612	1.32339	0.868142	1.16056	1.03355	1.06332	0.991834	0.850696	1.11394	1.10131	0.852996	1.00451	0.877832	0.980689	1.03448	0.970737	1.01939	1.16009
277	chr1	173429988	174048820	1.00451	1.10153	0.970154	1.02973	1.01238	1.16824	1.09889	1.08665	0.98906	1.1827	0.892169	0.998901	0.982652	1.01654	0.919707	1.01857	0.855474	0.949424	1.02521	1.00461	1.13883	0.956571	1.11851	1.35283	1.01319	0.997503	1.00652	1.03241	1.0612	1.32339	0.868142	1.16056	1.03355	1.06332	0.991834	0.850696	1.11394	1.10131	0.852996	1.00451	0.877832	0.980689	1.03448	0.970737	1.01939	1.16009
278	chr1	174048821	174718058	1.00451	1.10153	0.970154	1.02973	1.01238	1.16824	1.09889	1.08665	0.98906	1.1827	0.892169	0.998901	0.982652	1.01654	0.919707	1.01857	0.855474	0.949424	1.02521	1.00461	1.13883	0.956571	1.11851	1.35283	1.01319	0.997503	1.00652	1.03241	1.0612	1.32339	0.868142	1.16056	1.03355	1.06332	0.991834	0.850696	1.11394	1.10131	0.852996	1.00451	0.877832	0.980689	1.03448	0.970737	1.01939	1.16009
279	chr1	174718059	175291788	1.00451	1.10153	0.970154	1.02973	1.01238	1.16824	1.09889	1.08665	0.98906	1.1827	0.892169	0.998901	0.982652	1.01654	0.919707	1.01857	0.855474	0.949424	1.02521	1.00461	1.13883	0.956571	1.11851	1.35283	1.01319	0.997503	1.00652	1.03241	1.0612	1.32339	0.868142	1.16056	1.03355	1.06332	0.991834	0.850696	1.11394	1.10131	0.852996	1.00451	0.877832	0.980689	1.03448	0.970737	1.01939	1.16009
280	chr1	175291789	175811133	1.00451	1.10153	0.970154	1.02973	1.01238	1.16824	1.09889	1.08665	0.98906	1.1827	0.892169	0.998901	0.982652	1.01654	0.919707	1.01857	0.855474	0.949424	1.02521	1.00461	1.13883	0.956571	1.11851	1.35283	1.01319	0.997503	1.00652	1.03241	1.0612	1.32339	0.868142	1.16056	1.03355	1.06332	0.991834	0.850696	1.11394	1.10131	0.852996	1.00451	0.877832	0.980689	1.03448	0.970737	1.01939	1.16009
281	chr1	175811134	176430506	1.00451	1.10153	0.970154	1.02973	1.01238	1.16824	1.09889	1.08665	0.98906	1.1827	0.892169	0.998901	0.982652	1.01654	0.919707	1.01857	0.855474	0.949424	1.02521	1.00461	1.13883	0.956571	1.11851	1.35283	1.01319	0.997503	1.00652	1.03241	1.0612	1.32339	0.868142	1.16056	1.03355	1.06332	0.991834	0.850696	1.11394	1.10131	0.852996	1.00451	0.877832	0.980689	1.03448	0.970737	1.01939	1.16009
282	chr1	176430507	176987176	1.00451	1.10153	0.970154	1.02973	1.01238	1.16824	1.09889	1.08665	0.98906	1.1827	0.892169	0.998901	0.982652	1.01654	0.919707	1.01857	0.855474	0.949424	1.02521	1.00461	1.13883	0.956571	1.11851	1.35283	1.01319	0.997503	1.00652	1.03241	1.0612	1.32339	0.868142	1.16056	1.03355	1.06332	0.991834	0.850696	1.11394	1.10131	0.852996	1.00451	0.877832	0.980689	1.03448	0.970737	1.01939	1.16009
283	chr1	176987177	177519882	1.00451	1.10153	0.970154	0.876253	1.01238	1.16824	1.09889	1.08665	0.98906	1.1827	0.892169	0.998901	0.982652	1.01654	0.919707	1.01857	0.855474	0.949424	1.02521	1.00461	1.13883	0.956571	1.11851	1.35283	1.01319	0.997503	1.00652	1.03241	1.0612	1.32339	0.868142	1.16056	1.03355	1.06332	0.991834	0.850696	1.11394	1.10131	0.852996	1.00451	0.877832	0.980689	1.03448	0.970737	1.01939	1.16009
284	chr1	177519883	178071529	1.00451	1.10153	0.970154	0.876253	1.01238	1.16824	1.09889	1.08665	0.98906	1.1827	0.892169	0.998901	0.982652	1.01654	0.919707	1.01857	0.855474	0.949424	1.02521	1.00461	1.13883	0.956571	1.11851	1.35283	1.01319	0.997503	1.00652	1.03241	1.0612	1.32339	0.868142	1.16056	1.03355	1.06332	0.991834	0.850696	1.11394	1.10131	0.852996	1.00451	0.877832	0.980689	1.03448	0.970737	1.01939	1.16009
285	chr1	178071530	178617151	1.00451	1.10153	0.970154	0.876253	1.01238	1.16824	1.09889	1.08665	0.98906	1.1827	0.892169	0.998901	0.982652	1.01654	0.919707	1.01857	0.855474	0.949424	1.02521	1.00461	1.13883	0.956571	1.11851	1.35283	1.01319	0.997503	1.00652	1.03241	1.0612	1.32339	0.868142	1.16056	1.03355	1.06332	0.991834	0.850696	1.11394	1.10131	0.852996	1.00451	0.877832	0.980689	1.03448	0.970737	1.01939	1.16009
286	chr1	178617152	179183920	1.00451	1.10153	0.970154	0.876253	1.01238	1.16824	1.09889	1.08665	0.98906	1.1827	0.892169	0.998901	0.982652	1.01654	0.919707	1.01857	0.855474	0.949424	1.02521	1.00461	1.13883	0.956571	1.11851	1.35283	1.01319	0.997503	1.00652	1.03241	1.0612	1.10362	0.868142	1.16056	1.03355	1.06332	0.991834	0.850696	1.11394	1.10131	0.852996	1.00451	0.877832	0.980689	1.03448	0.970737	1.01939	1.16009
287	chr1	179183921	179801512	1.00451	1.10153	0.970154	0.876253	1.01238	1.16824	1.09889	1.08665	0.98906	1.1827	0.892169	0.998901	0.982652	1.01654	0.919707	1.01857	0.855474	0.949424	1.02521	1.00461	1.13883	0.956571	1.11851	1.35283	1.01319	0.997503	1.00652	1.03241	1.0612	1.10362	0.868142	1.16056	1.03355	1.06332	0.991834	0.850696	1.11394	1.10131	0.852996	1.00451	0.877832	0.980689	1.03448	0.970737	1.01939	1.16009
288	chr1	179801513	180363739	1.00451	1.10153	0.970154	0.876253	1.01238	1.16824	1.09889	1.08665	0.98906	1.1827	0.892169	0.998901	0.982652	1.01654	0.919707	1.01857	0.855474	0.949424	1.02521	1.00461	1.13883	0.956571	1.11851	1.35283	1.01319	0.997503	1.00652	1.03241	1.0612	1.10362	0.868142	1.16056	1.03355	1.06332	0.991834	0.850696	1.11394	1.10131	0.852996	1.00451	0.877832	0.980689	1.03448	0.970737	1.01939	1.16009
289	chr1	180363740	180944217	1.00451	1.10153	0.970154	0.876253	1.01238	1.16824	1.09889	1.08665	0.98906	1.1827	0.892169	0.998901	0.982652	1.01654	0.919707	1.01857	0.855474	0.949424	1.02521	1.00461	1.13883	0.956571	1.11851	1.35283	1.01319	0.997503	1.00652	1.03241	1.0612	1.10362	0.868142	1.16056	1.03355	1.06332	0.991834	0.850696	1.11394	1.10131	0.852996	1.00451	0.877832	0.980689	1.03448	0.970737	1.01939	1.16009
290	chr1	180944218	181474886	1.00451	1.10153	0.970154	0.876253	1.01238	1.16824	1.09889	1.08665	0.98906	1.1827	0.892169	0.998901	0.982652	1.01654	0.919707	1.01857	0.855474	0.949424	1.02521	1.00461	1.13883	0.956571	1.11851	1.35283	1.01319	0.997503	1.00652	1.03241	1.0612	1.10362	0.868142	1.16056	1.03355	1.06332	0.991834	0.850696	1.11394	1.10131	0.852996	1.00451	0.877832	0.980689	1.03448	0.970737	1.01939	1.16009
291	chr1	181474887	182029950	1.00451	1.10153	0.970154	0.876253	1.01238	1.16824	1.09889	1.08665	0.98906	1.1827	0.892169	0.998901	0.982652	1.01654	0.919707	1.01857	0.855474	0.949424	1.02521	1.00461	1.13883	0.956571	1.11851	1.35283	1.01319	0.997503	1.00652	1.03241	1.0612	1.10362	0.868142	1.16056	1.03355	1.06332	0.991834	0.850696	0.697676	1.10131	0.852996	1.00451	0.877832	0.980689	1.03448	0.970737	1.01939	1.16009
292	chr1	182029951	182594508	1.00451	1.10153	0.970154	0.876253	1.01238	1.16824	1.09889	1.08665	0.98906	1.1827	0.892169	0.998901	0.982652	1.01654	0.919707	1.01857	0.855474	0.949424	1.02521	1.00461	1.13883	0.956571	1.11851	1.35283	1.01319	0.997503	1.00652	1.03241	1.0612	1.10362	0.868142	1.16056	1.03355	1.06332	0.991834	0.850696	0.697676	1.10131	0.852996	1.00451	0.877832	0.980689	1.03448	0.970737	1.01939	1.16009
293	chr1	182594509	183145444	1.00451	1.10153	0.970154	0.876253	1.01238	1.16824	1.09889	1.08665	0.98906	1.1827	0.892169	0.998901	0.982652	1.01654	0.919707	1.01857	0.855474	0.949424	1.02521	1.00461	1.13883	0.956571	1.11851	1.35283	1.01319	0.997503	1.00652	1.03241	1.0612	1.10362	0.868142	1.00914	1.03355	1.06332	0.991834	0.850696	0.697676	1.10131	0.852996	1.00451	0.877832	0.980689	1.03448	0.970737	1.01939	1.16009
294	chr1	183145445	183703833	1.00451	1.10153	0.970154	0.876253	1.01238	1.16824	1.09889	1.08665	0.98906	1.1827	0.892169	0.998901	0.982652	1.01654	0.919707	1.01857	0.855474	0.949424	1.02521	1.00461	1.13883	0.956571	1.11851	1.35283	1.01319	0.997503	1.00652	1.03241	1.0612	1.10362	0.868142	1.00914	1.03355	1.06332	0.991834	0.850696	0.697676	1.10131	0.852996	1.00451	0.877832	0.980689	1.03448	0.970737	1.01939	1.16009
295	chr1	183703834	184230504	1.00451	1.10153	0.970154	0.876253	1.01238	1.16824	1.09889	1.08665	0.98906	1.1827	0.892169	1.25571	0.982652	1.01654	0.919707	1.01857	0.855474	0.949424	1.02521	1.00461	1.13883	0.956571	1.11851	1.35283	1.01319	0.997503	1.00652	1.03241	1.0612	1.10362	0.868142	1.00914	1.03355	1.06332	0.991834	0.850696	0.697676	1.10131	0.852996	1.00451	0.877832	0.980689	1.03448	0.970737	1.01939	1.16009
296	chr1	184230505	184775642	1.00451	1.10153	0.970154	0.876253	1.01238	1.16824	1.09889	1.08665	0.98906	1.1827	0.892169	1.25571	0.982652	1.01654	0.919707	1.01857	1.26617	0.949424	1.02521	1.00461	1.13883	0.956571	1.11851	1.35283	1.01319	0.997503	1.00652	1.03241	1.0612	1.10362	0.868142	1.00914	1.03355	1.06332	0.991834	0.850696	0.697676	1.10131	0.852996	1.00451	0.877832	0.980689	1.03448	0.970737	1.01939	1.16009
297	chr1	184775643	185364729	1.00451	1.10153	0.970154	0.876253	1.01238	1.16824	1.09889	1.08665	0.98906	1.1827	0.892169	1.25571	0.982652	1.01654	0.919707	1.01857	1.26617	0.949424	1.02521	1.00461	1.13883	0.956571	1.11851	1.35283	1.01319	0.997503	1.00652	1.03241	1.0612	1.10362	0.868142	1.00914	1.03355	1.06332	0.991834	1.03056	0.697676	1.10131	0.852996	1.00451	0.877832	0.980689	1.03448	0.970737	1.01939	1.16009
298	chr1	185364730	185958867	1.00451	1.10153	0.970154	0.876253	1.01238	1.16824	1.09889	1.08665	0.98906	1.1827	0.892169	1.25571	0.982652	1.01654	0.919707	1.01857	1.26617	0.949424	1.02521	1.00461	1.13883	0.956571	1.11851	1.35283	1.01319	0.997503	1.00652	1.03241	1.0612	1.10362	0.868142	1.00914	1.03355	1.06332	0.991834	1.03056	0.697676	1.10131	0.852996	1.00451	0.877832	0.980689	1.03448	0.970737	1.01939	1.16009
299	chr1	185958868	186547492	1.00451	1.10153	0.970154	0.876253	1.01238	1.16824	1.09889	1.08665	0.98906	1.1827	0.892169	1.25571	0.982652	1.01654	0.919707	1.01857	1.26617	0.949424	1.02521	1.00461	1.13883	0.956571	1.11851	1.35283	1.01319	0.997503	1.00652	1.03241	1.0612	1.10362	0.868142	1.00914	1.03355	1.06332	0.991834	1.03056	0.697676	1.10131	0.852996	1.00451	0.877832	0.980689	1.03448	0.970737	1.01939	1.16009
300	chr1	186547493	187181921	1.00451	1.10153	0.970154	0.876253	1.01238	1.16824	1.09889	1.08665	0.98906	1.1827	0.892169	1.25571	0.982652	1.01654	0.919707	1.01857	1.69367	0.949424	1.02521	1.00461	1.13883	0.956571	1.11851	1.35283	1.01319	0.997503	1.00652	1.03241	1.0612	1.10362	0.868142	1.00914	1.03355	1.06332	0.991834	1.03056	0.697676	1.10131	0.852996	1.00451	0.877832	0.980689	1.03448	0.970737	1.01939	1.16009
301	chr1	187181922	187838777	1.00451	1.10153	0.970154	0.876253	1.01238	1.16824	1.09889	1.08665	0.98906	1.1827	0.892169	1.25571	0.982652	1.01654	0.919707	1.01857	1.69367	0.949424	1.02521	1.00461	1.13883	0.956571	1.11851	1.35283	1.01319	0.997503	1.00652	1.03241	1.0612	1.10362	0.868142	1.00914	1.03355	1.06332	0.991834	1.03056	0.97492	1.10131	0.852996	1.00451	0.877832	0.980689	1.03448	0.970737	1.01939	1.16009
302	chr1	187838778	188522302	1.00451	1.10153	0.970154	0.876253	1.01238	1.16824	1.09889	1.08665	0.98906	1.1827	1.1361	1.25571	0.982652	1.01654	0.919707	1.01857	1.69367	0.949424	1.02521	1.00461	1.13883	0.956571	1.11851	1.35283	1.01319	0.997503	1.00652	1.03241	1.0612	1.10362	0.868142	1.00914	1.03355	1.06332	0.991834	1.03056	0.97492	1.10131	0.852996	1.00451	0.877832	0.980689	1.03448	0.970737	1.01939	1.16009
303	chr1	188522303	189249333	1.00451	1.10153	0.970154	0.876253	1.01238	1.16824	1.09889	1.08665	0.98906	1.1827	1.1361	1.25571	0.982652	1.01654	0.919707	1.01857	1.69367	0.949424	1.02521	1.00461	1.13883	0.956571	1.11851	1.35283	1.01319	0.997503	1.00652	1.03241	1.0612	1.10362	0.868142	1.00914	1.03355	1.06332	0.991834	1.03056	0.97492	1.10131	0.852996	1.00451	0.877832	0.980689	1.03448	0.970737	1.01939	1.16009
304	chr1	189249334	190011952	1.00451	1.10153	0.970154	0.876253	1.01238	1.16824	1.09889	1.08665	0.98906	1.1827	1.1361	1.25571	0.982652	1.01654	0.919707	1.01857	1.69367	0.949424	1.02521	1.00461	1.13883	0.956571	1.11851	1.35283	1.01319	0.997503	1.00652	1.03241	1.0612	1.10362	0.868142	1.00914	1.03355	1.06332	0.991834	1.03056	1.28364	1.10131	0.852996	1.00451	0.877832	0.980689	1.03448	0.970737	1.01939	1.16009
305	chr1	190011953	190714328	1.00451	1.10153	0.970154	0.876253	1.01238	1.16824	1.09889	1.08665	0.98906	1.1827	1.1361	1.25571	0.982652	1.01654	0.919707	1.01857	1.69367	0.949424	1.02521	1.00461	1.13883	0.956571	1.11851	1.35283	1.01319	0.997503	1.00652	1.03241	1.0612	1.10362	0.868142	1.00914	1.03355	1.06332	0.991834	1.03056	1.28364	1.10131	0.852996	1.00451	0.877832	0.980689	1.03448	0.970737	1.01939	1.16009
306	chr1	190714329	191409719	1.00451	1.10153	0.970154	0.876253	1.01238	1.16824	1.09889	1.08665	0.98906	1.1827	1.1361	1.25571	0.982652	1.01654	0.919707	1.01857	1.69367	0.949424	1.02521	1.00461	1.13883	0.956571	1.11851	1.35283	1.01319	0.997503	1.00652	1.03241	1.0612	1.10362	0.868142	1.00914	1.03355	1.06332	0.991834	1.03056	1.28364	1.10131	0.852996	1.00451	0.877832	0.980689	1.03448	0.970737	1.01939	1.16009
307	chr1	191409720	192076189	1.00451	1.10153	0.970154	0.876253	1.01238	1.16824	1.09889	1.08665	0.98906	1.1827	1.1361	1.25571	0.982652	1.01654	0.919707	1.01857	1.69367	0.949424	1.02521	1.00461	1.13883	0.956571	1.11851	1.35283	1.01319	0.997503	1.00652	1.03241	1.0612	1.10362	0.868142	1.00914	1.03355	1.06332	0.991834	1.03056	1.28364	1.10131	0.852996	1.00451	0.877832	0.980689	1.03448	0.970737	1.01939	1.16009
308	chr1	192076190	192699909	1.00451	1.10153	0.970154	0.876253	1.01238	1.16824	1.09889	1.08665	0.98906	1.1827	1.1361	1.25571	0.982652	1.01654	0.919707	1.01857	1.69367	0.949424	1.02521	1.00461	1.13883	0.956571	1.11851	1.35283	1.01319	0.997503	1.00652	1.03241	1.0612	1.10362	0.868142	1.00914	1.03355	1.06332	0.991834	0.863639	1.28364	1.10131	0.852996	1.00451	0.877832	0.980689	1.03448	0.970737	1.01939	1.16009
309	chr1	192699910	193302245	1.00451	1.10153	0.970154	0.876253	1.01238	1.16824	1.09889	1.08665	0.98906	1.1827	1.1361	1.25571	0.982652	1.01654	0.919707	1.01857	1.69367	0.949424	1.02521	1.00461	1.13883	0.956571	1.11851	1.35283	1.01319	0.997503	1.00652	1.03241	1.0612	1.10362	0.868142	1.00914	1.03355	1.06332	0.991834	0.863639	1.28364	1.10131	0.852996	1.00451	0.877832	0.980689	1.03448	0.970737	1.01939	1.16009
310	chr1	193302246	193902297	1.00451	1.10153	0.970154	0.876253	1.01238	1.16824	1.09889	1.08665	0.98906	1.1827	1.1361	1.25571	0.982652	1.01654	0.919707	1.01857	1.69367	0.949424	1.02521	1.00461	1.13883	0.956571	1.11851	1.35283	1.01319	0.997503	1.00652	1.03241	1.0612	1.10362	0.868142	1.00914	1.03355	1.06332	0.991834	0.863639	1.28364	1.10131	0.852996	1.00451	0.877832	0.980689	1.03448	0.970737	1.01939	1.16009
311	chr1	193902298	194588139	1.00451	1.10153	0.970154	0.876253	1.01238	1.16824	1.09889	1.08665	0.98906	1.1827	1.1361	0.952181	0.982652	1.01654	0.919707	1.01857	1.69367	0.949424	1.02521	1.00461	1.13883	0.956571	1.11851	1.35283	1.01319	0.997503	1.00652	1.03241	1.0612	1.10362	0.868142	1.00914	1.03355	1.06332	0.991834	0.863639	1.28364	1.10131	0.852996	1.00451	0.877832	0.980689	1.03448	0.970737	1.01939	1.16009
312	chr1	194588140	195294570	1.00451	1.10153	0.970154	0.876253	1.01238	1.16824	1.09889	1.08665	0.98906	1.1827	1.1361	0.952181	0.982652	1.01654	0.919707	1.01857	1.69367	0.949424	1.02521	1.00461	1.13883	0.956571	1.11851	1.35283	1.01319	0.997503	1.00652	1.03241	1.0612	1.10362	0.868142	1.00914	1.03355	1.06332	0.991834	0.863639	1.28364	1.10131	0.852996	1.00451	0.877832	0.980689	1.03448	0.970737	1.01939	1.16009
313	chr1	195294571	195971410	1.00451	1.10153	0.970154	0.876253	1.01238	1.16824	1.09889	1.08665	0.98906	1.1827	1.1361	0.952181	0.982652	1.01654	0.919707	1.01857	1.69367	0.949424	1.02521	1.00461	1.13883	0.956571	1.11851	1.35283	1.01319	0.997503	1.00652	1.03241	1.0612	1.10362	0.868142	1.00914	1.03355	1.06332	0.991834	0.863639	1.28364	1.10131	0.852996	1.00451	0.877832	0.980689	1.03448	0.970737	1.01939	1.16009
314	chr1	195971411	196608520	1.00451	1.10153	0.970154	0.876253	1.01238	1.16824	1.09889	1.08665	0.98906	1.1827	1.1361	0.952181	0.982652	1.01654	0.919707	1.01857	1.69367	0.949424	1.02521	1.00461	1.13883	0.956571	1.11851	1.35283	1.01319	0.997503	1.00652	1.03241	1.0612	1.10362	0.868142	1.00914	1.03355	1.06332	0.991834	0.863639	1.28364	1.10131	0.852996	1.00451	0.877832	0.980689	1.03448	0.970737	1.01939	1.16009
315	chr1	196608521	197238353	1.00451	1.10153	0.970154	1.02757	1.01238	1.16824	1.09889	1.08665	0.98906	1.1827	1.1361	0.952181	0.982652	1.01654	0.919707	1.01857	1.69367	0.949424	1.02521	1.00461	1.13883	0.956571	1.11851	1.35283	1.01319	0.997503	1.00652	1.03241	1.0612	1.10362	0.868142	1.00914	1.03355	1.06332	0.991834	0.863639	1.28364	1.10131	0.852996	1.00451	0.877832	0.980689	1.03448	0.970737	1.01939	1.16009
316	chr1	197238354	197896658	1.00451	1.10153	1.09046	1.02757	1.01238	1.16824	1.09889	1.08665	0.98906	1.1827	1.1361	0.952181	0.982652	1.01654	0.919707	1.01857	1.69367	0.949424	1.02521	1.00461	1.13883	0.956571	1.11851	1.35283	1.01319	0.997503	1.00652	1.03241	1.0612	1.10362	0.868142	1.00914	1.03355	1.06332	0.991834	0.863639	1.28364	1.10131	0.852996	1.00451	0.877832	0.980689	1.03448	0.970737	1.01939	1.16009
317	chr1	197896659	198484139	1.00451	1.10153	1.09046	1.02757	1.01238	1.16824	1.09889	1.08665	0.98906	1.1827	1.1361	0.952181	0.982652	1.01654	0.919707	1.01857	1.30656	0.949424	1.02521	1.00461	1.13883	0.956571	1.11851	1.35283	1.01319	0.997503	1.00652	1.03241	1.0612	1.10362	1.0662	1.00914	1.03355	1.06332	0.991834	0.863639	1.28364	1.10131	0.852996	1.00451	0.877832	0.980689	1.03448	0.970737	1.01939	1.16009
318	chr1	198484140	199063095	1.00451	1.10153	1.09046	1.02757	1.01238	1.16824	0.872843	1.08665	0.98906	1.1827	1.1361	0.952181	0.982652	1.01654	0.919707	1.01857	1.30656	0.949424	1.02521	1.00461	1.13883	0.956571	1.11851	1.35283	1.01319	0.997503	1.00652	1.03241	1.0612	1.10362	1.0662	1.00914	1.03355	1.06332	0.991834	0.863639	1.28364	1.10131	0.852996	1.00451	0.877832	0.980689	1.03448	0.970737	1.01939	1.16009
319	chr1	199063096	199678538	1.00451	1.10153	1.09046	1.02757	1.01238	1.16824	0.872843	1.08665	0.98906	1.1827	1.1361	0.952181	0.982652	1.01654	0.919707	1.01857	1.30656	0.949424	1.02521	1.00461	1.13883	0.956571	1.11851	1.35283	1.01319	0.997503	1.00652	1.03241	1.0612	1.10362	1.0662	1.00914	1.03355	1.06332	0.991834	0.863639	1.28364	1.10131	0.852996	1.00451	0.877832	0.980689	1.03448	0.970737	1.01939	1.16009
320	chr1	199678539	200252753	1.00451	1.10153	1.09046	1.02757	1.01238	1.16824	0.872843	1.08665	0.98906	1.1827	1.1361	0.952181	0.982652	1.01654	0.919707	1.01857	1.01755	0.949424	1.02521	1.00461	1.13883	0.956571	1.11851	1.35283	1.01319	0.997503	1.00652	1.03241	1.0612	1.10362	1.0662	1.00914	1.03355	1.06332	0.991834	0.863639	1.28364	1.10131	0.852996	1.00451	0.877832	0.980689	1.03448	0.970737	1.01939	1.16009
321	chr1	200252754	200829650	1.00451	1.10153	1.09046	1.02757	1.01238	1.16824	0.872843	1.08665	0.98906	1.1827	1.1361	0.952181	0.982652	1.01654	0.919707	1.01857	1.01755	0.949424	1.02521	1.00461	1.13883	0.956571	1.11851	1.35283	1.01319	0.997503	1.00652	1.03241	1.0612	1.10362	1.0662	1.00914	1.03355	1.06332	0.991834	0.863639	1.28364	1.10131	0.852996	1.00451	1.19674	0.980689	1.03448	0.970737	1.01939	1.16009
322	chr1	200829651	201330821	1.00451	1.10153	1.09046	1.02757	1.01238	1.16824	0.872843	1.08665	0.98906	1.1827	1.1361	0.952181	0.982652	1.01654	0.654489	1.01857	1.01755	0.949424	1.02521	1.00461	1.13883	0.956571	1.11851	1.35283	1.01319	0.997503	1.00652	1.03241	1.0612	1.10362	1.0662	1.00914	1.03355	1.06332	0.991834	0.863639	1.28364	1.10131	1.27341	1.00451	1.19674	0.980689	1.03448	0.970737	1.01939	1.16009
323	chr1	201330822	201843451	1.00451	1.10153	1.09046	1.02757	1.01238	1.16824	0.872843	1.08665	0.98906	1.1827	1.1361	0.952181	0.982652	1.01654	0.654489	1.01857	1.01755	0.949424	1.02521	1.00461	1.13883	0.956571	1.11851	1.35283	1.01319	0.997503	1.00652	1.03241	1.0612	1.10362	1.0662	1.00914	1.03355	1.06332	0.991834	0.863639	1.28364	1.10131	1.27341	1.00451	1.19674	0.980689	1.03448	0.970737	1.01939	1.16009
324	chr1	201843452	202398637	1.00451	1.10153	1.09046	1.02757	1.01238	1.16824	0.872843	1.08665	0.98906	1.1827	1.1361	0.952181	0.982652	1.01654	0.654489	1.01857	1.01755	0.949424	1.02521	1.00461	1.13883	0.956571	1.11851	1.35283	1.01319	0.997503	1.00652	1.03241	1.0612	1.10362	1.0662	1.00914	1.03355	1.06332	0.991834	0.863639	1.28364	1.10131	1.27341	1.00451	1.19674	0.980689	1.03448	0.970737	1.01939	1.16009
325	chr1	202398638	202930496	1.00451	1.10153	1.09046	1.02757	1.01238	1.16824	0.872843	1.08665	0.98906	1.1827	1.1361	0.952181	0.982652	1.01654	0.654489	1.01857	1.01755	0.949424	1.02521	1.00461	1.13883	0.956571	1.11851	1.35283	1.01319	0.997503	1.00652	1.03241	1.0612	0.818485	1.0662	1.00914	1.03355	1.06332	0.991834	0.863639	1.28364	1.10131	1.27341	1.00451	1.19674	0.980689	1.03448	0.970737	1.01939	1.16009
326	chr1	202930497	203442514	1.00451	1.10153	1.09046	1.02757	1.01238	1.16824	0.872843	1.08665	0.98906	1.1827	1.1361	0.952181	0.982652	1.01654	0.654489	1.01857	1.01755	0.949424	1.02521	1.00461	1.13883	0.956571	1.11851	1.35283	1.01319	0.997503	1.00652	1.03241	1.0612	0.818485	0.863294	1.00914	1.03355	1.06332	0.991834	0.863639	1.28364	1.10131	1.27341	1.00451	1.19674	0.980689	1.03448	0.970737	1.01939	1.16009
327	chr1	203442515	203995279	1.00451	1.10153	1.09046	1.02757	1.01238	1.16824	0.872843	1.08665	0.98906	1.1827	1.1361	0.952181	0.982652	1.01654	0.654489	1.01857	1.01755	0.949424	1.02521	1.00461	1.13883	0.956571	1.11851	1.35283	1.01319	0.997503	1.00652	1.03241	1.0612	0.818485	0.863294	1.00914	1.03355	1.06332	0.991834	0.863639	1.28364	1.10131	1.27341	1.00451	1.19674	0.980689	1.03448	0.970737	1.01939	1.16009
328	chr1	203995280	204509755	1.00451	1.10153	1.09046	1.02757	1.01238	1.16824	0.872843	1.08665	0.98906	1.1827	1.1361	0.952181	0.982652	1.01654	0.654489	1.01857	1.01755	0.949424	1.02521	1.00461	1.13883	0.956571	1.11851	1.35283	1.01319	0.997503	1.00652	1.03241	1.0612	0.818485	0.863294	1.00914	1.03355	1.06332	0.991834	0.863639	1.28364	1.10131	1.27341	1.00451	1.19674	0.980689	1.03448	0.970737	1.01939	1.16009
329	chr1	204509756	205005865	1.00451	1.10153	1.09046	1.02757	1.01238	1.16824	0.872843	1.08665	0.98906	1.1827	1.1361	0.952181	0.982652	1.01654	0.654489	1.01857	1.01755	0.949424	1.02521	1.00461	1.13883	0.956571	1.11851	1.35283	1.01319	0.997503	1.00652	1.03241	1.0612	0.818485	0.863294	1.00914	1.03355	1.06332	0.991834	0.863639	1.28364	1.10131	1.27341	1.00451	1.19674	0.980689	1.03448	0.970737	1.01939	1.16009
330	chr1	205005866	205530310	1.00451	1.10153	1.09046	1.02757	1.01238	1.16824	0.872843	1.08665	0.98906	1.1827	1.1361	0.952181	0.982652	1.01654	0.654489	1.01857	1.01755	0.949424	1.02521	1.00461	1.13883	0.956571	1.11851	1.35283	1.01319	0.997503	1.00652	1.03241	1.0612	0.818485	0.686946	1.00914	1.03355	1.06332	0.991834	0.863639	1.28364	1.10131	1.27341	1.00451	1.19674	0.980689	1.03448	0.970737	1.01939	1.16009
331	chr1	205530311	206167745	1.00451	1.10153	1.09046	1.02757	1.01238	1.16824	0.872843	1.08665	0.98906	1.1827	1.1361	0.952181	0.982652	1.01654	0.654489	1.01857	1.01755	0.949424	1.02521	1.00461	1.13883	0.956571	1.11851	1.35283	1.01319	0.997503	1.00652	1.03241	1.0612	1.12592	0.686946	1.00914	1.03355	1.06332	0.991834	0.863639	1.28364	1.10131	1.27341	1.00451	1.19674	0.980689	1.03448	0.970737	1.01939	1.16009
332	chr1	206167746	206732803	1.00451	1.10153	1.09046	1.02757	1.01238	1.16824	0.872843	1.08665	0.98906	1.1827	1.1361	0.952181	0.982652	1.01654	0.654489	1.01857	0.655537	0.949424	1.02521	1.00461	1.13883	0.956571	1.11851	1.35283	1.01319	1.19184	1.00652	1.03241	1.0612	1.12592	0.686946	1.00914	1.03355	1.06332	0.991834	0.863639	1.28364	1.10131	1.27341	1.00451	1.19674	0.980689	1.03448	0.970737	1.01939	1.16009
333	chr1	206732804	207232712	1.00451	1.10153	1.09046	1.02757	1.01238	1.16824	0.872843	1.08665	0.98906	1.1827	1.1361	0.952181	0.982652	1.01654	0.654489	1.01857	0.655537	0.949424	1.02521	1.00461	1.13883	0.956571	1.11851	1.35283	1.01319	1.19184	1.00652	1.03241	1.0612	1.12592	0.686946	1.00914	1.03355	1.06332	0.991834	0.863639	1.28364	1.10131	1.27341	1.00451	1.19674	0.980689	1.03448	0.970737	1.01939	1.16009
334	chr1	207232713	207811117	1.00451	1.10153	1.09046	1.02757	1.01238	1.16824	0.872843	1.08665	0.98906	1.1827	1.1361	0.952181	0.982652	1.01654	0.654489	1.01857	0.655537	0.949424	1.02521	1.00461	1.13883	0.956571	1.11851	1.35283	1.01319	1.19184	1.00652	1.03241	1.0612	1.12592	0.686946	1.00914	1.03355	1.06332	0.991834	0.863639	1.28364	1.10131	1.27341	1.00451	1.19674	0.980689	1.03448	0.970737	1.01939	1.16009
335	chr1	207811118	208345901	1.00451	1.10153	1.09046	1.02757	1.01238	1.16824	0.872843	1.08665	0.98906	1.1827	1.1361	0.952181	0.982652	1.01654	0.654489	1.01857	0.655537	0.949424	1.02521	1.00461	1.13883	0.956571	1.11851	1.35283	1.01319	1.19184	1.00652	1.03241	1.0612	1.12592	0.686946	1.00914	1.03355	1.06332	0.991834	0.863639	1.28364	1.10131	1.27341	1.00451	1.19674	0.980689	1.03448	0.970737	1.01939	1.16009
336	chr1	208345902	208887442	1.00451	1.10153	1.09046	1.02757	1.01238	1.16824	0.872843	1.08665	0.98906	1.55426	1.1361	0.952181	0.982652	1.01654	0.654489	1.01857	0.655537	0.949424	1.02521	1.00461	1.13883	0.956571	1.11851	1.35283	1.01319	1.19184	1.00652	1.03241	1.0612	1.12592	0.875115	1.00914	1.03355	1.06332	0.991834	0.863639	1.28364	1.10131	1.27341	1.00451	1.19674	0.980689	1.03448	0.970737	1.01939	1.16009
337	chr1	208887443	209469269	1.00451	1.10153	1.09046	1.02757	1.01238	1.16824	0.872843	1.08665	0.98906	1.55426	1.1361	0.952181	0.982652	1.01654	0.654489	1.01857	0.655537	0.949424	1.02521	1.00461	1.13883	0.956571	1.11851	1.35283	1.01319	1.19184	1.00652	1.03241	1.0612	1.12592	0.875115	1.00914	1.03355	1.06332	0.991834	0.863639	1.00541	1.10131	1.27341	1.00451	1.19674	0.980689	1.03448	0.970737	1.01939	1.16009
338	chr1	209469270	209972310	1.00451	1.10153	1.09046	1.02757	1.01238	1.16824	0.872843	1.08665	0.98906	1.55426	1.1361	0.952181	0.982652	1.01654	0.654489	1.01857	0.655537	0.949424	1.02521	1.00461	1.13883	0.956571	1.11851	1.35283	1.01319	1.19184	1.00652	1.03241	1.0612	1.12592	0.875115	1.00914	1.03355	1.06332	0.991834	0.863639	1.00541	1.10131	1.27341	1.00451	1.19674	0.980689	1.03448	0.970737	1.01939	1.16009
339	chr1	209972311	210569208	1.00451	1.10153	1.09046	1.02757	1.01238	1.16824	0.872843	1.08665	0.98906	1.55426	1.1361	0.952181	0.982652	1.01654	0.654489	1.01857	0.655537	0.949424	1.02521	1.00461	1.13883	0.956571	1.11851	1.35283	1.01319	1.19184	1.00652	1.03241	1.0612	1.12592	0.875115	1.00914	1.03355	1.06332	0.991834	0.863639	1.00541	1.10131	1.27341	1.00451	1.19674	0.980689	1.03448	0.970737	1.01939	1.16009
340	chr1	210569209	211113375	1.00451	1.10153	1.09046	1.02757	1.01238	1.16824	0.872843	1.08665	0.98906	1.55426	1.1361	0.952181	0.982652	1.01654	0.654489	1.01857	0.655537	0.949424	1.02521	1.00461	1.13883	0.956571	1.11851	1.35283	1.01319	1.19184	1.00652	1.03241	1.0612	1.12592	1.01857	1.00914	1.03355	1.06332	0.991834	0.863639	1.00541	1.10131	1.27341	1.00451	1.19674	0.980689	1.03448	0.970737	1.01939	1.16009
341	chr1	211113376	211737059	1.00451	1.10153	1.09046	1.02757	1.01238	1.16824	0.872843	1.08665	0.98906	1.20539	1.1361	0.952181	0.982652	1.01654	0.654489	1.01857	0.655537	0.949424	1.02521	1.00461	1.13883	0.956571	1.11851	1.35283	1.01319	1.19184	1.00652	1.03241	1.0612	1.12592	1.01857	1.00914	1.03355	1.06332	0.991834	0.863639	1.00541	1.10131	1.27341	1.00451	1.19674	0.980689	1.03448	0.970737	1.01939	1.16009
342	chr1	211737060	212295514	1.00451	1.10153	1.09046	1.02757	1.01238	1.16824	0.872843	1.08665	0.98906	1.20539	1.1361	0.952181	0.982652	1.01654	0.654489	1.01857	0.655537	0.949424	1.02521	1.00461	1.13883	0.956571	1.11851	1.35283	1.01319	1.19184	1.00652	1.03241	1.0612	1.12592	1.01857	1.00914	1.03355	1.06332	0.991834	0.863639	1.00541	1.10131	1.27341	1.00451	1.19674	0.980689	1.03448	0.970737	1.01939	1.16009
343	chr1	212295515	212843078	1.00451	1.10153	1.09046	1.02757	1.01238	1.16824	0.872843	1.08665	0.98906	1.20539	1.1361	0.952181	0.982652	1.01654	0.654489	1.01857	0.655537	0.949424	1.02521	1.00461	1.13883	0.956571	1.11851	1.35283	1.01319	1.19184	1.00652	1.03241	1.0612	1.12592	1.01857	1.00914	1.03355	1.06332	0.991834	0.863639	1.00541	1.10131	1.27341	1.00451	1.19674	0.980689	1.03448	0.970737	1.01939	1.16009
344	chr1	212843079	213453370	1.00451	1.10153	1.09046	1.02757	1.01238	1.16824	0.872843	1.08665	0.98906	1.20539	1.1361	0.952181	0.982652	1.01654	0.654489	1.01857	0.919983	0.949424	1.02521	1.00461	1.13883	0.956571	1.11851	1.35283	1.01319	1.19184	1.00652	1.03241	1.0612	1.12592	1.01857	1.00914	1.03355	1.06332	0.991834	0.863639	1.00541	1.10131	1.27341	1.00451	1.19674	1.16218	1.03448	0.970737	1.01939	1.16009
345	chr1	213453371	213977040	1.00451	1.10153	1.09046	1.02757	1.01238	1.16824	0.872843	1.08665	0.98906	1.20539	1.1361	0.952181	0.982652	1.01654	0.654489	1.01857	0.919983	0.949424	1.02521	1.00461	1.13883	0.956571	1.11851	1.35283	1.01319	1.19184	1.00652	1.03241	1.0612	1.12592	1.01857	1.00914	1.03355	1.06332	0.991834	0.863639	1.00541	1.10131	1.27341	1.00451	1.19674	1.16218	1.03448	0.970737	1.01939	1.16009
346	chr1	213977041	214535485	1.00451	1.10153	1.34555	1.02757	1.01238	1.16824	0.872843	1.08665	0.98906	1.20539	1.1361	0.952181	0.982652	1.01654	0.654489	1.01857	0.919983	0.949424	1.02521	1.00461	1.13883	0.956571	1.11851	1.35283	1.01319	1.19184	1.00652	1.03241	1.0612	1.12592	1.01857	1.00914	1.03355	1.06332	0.991834	0.863639	1.00541	1.10131	1.27341	1.00451	1.19674	1.16218	1.03448	0.970737	1.01939	1.16009
347	chr1	214535486	215089277	1.00451	1.10153	1.34555	1.02757	1.01238	1.16824	0.872843	1.08665	0.98906	1.20539	1.1361	0.952181	0.982652	1.01654	0.654489	1.01857	0.919983	0.949424	1.02521	1.00461	1.13883	0.956571	1.11851	1.35283	1.01319	1.19184	1.00652	1.03241	1.0612	1.12592	1.01857	1.00914	1.03355	0.963869	0.991834	0.863639	1.00541	1.10131	1.27341	1.00451	1.19674	1.16218	1.03448	0.970737	1.01939	1.16009
348	chr1	215089278	215681761	1.00451	1.10153	1.34555	1.02757	1.01238	1.16824	0.872843	1.08665	0.98906	1.20539	1.1361	0.952181	0.982652	1.01654	0.654489	1.01857	0.919983	0.949424	1.02521	1.00461	1.13883	0.956571	1.11851	1.35283	1.01319	1.19184	1.00652	1.03241	1.0612	1.12592	1.01857	1.00914	1.03355	0.963869	0.991834	0.863639	1.00541	1.10131	1.27341	1.00451	1.19674	1.16218	1.03448	0.970737	1.01939	1.16009
349	chr1	215681762	216280180	1.00451	1.10153	1.34555	1.02757	1.01238	1.16824	0.872843	1.08665	0.98906	1.20539	1.1361	0.952181	0.982652	1.01654	0.654489	1.01857	0.919983	0.949424	1.02521	1.00461	1.13883	0.956571	1.11851	1.35283	1.01319	1.19184	1.00652	1.03241	1.0612	1.12592	1.01857	1.00914	1.03355	0.963869	0.991834	0.863639	1.00541	1.10131	1.27341	1.00451	1.19674	1.16218	1.03448	0.970737	1.01939	1.16009
350	chr1	216280181	216880564	1.00451	1.10153	1.34555	1.02757	1.01238	1.16824	0.872843	1.08665	0.98906	1.20539	1.1361	0.952181	0.982652	1.01654	0.654489	1.01857	0.919983	0.843412	1.02521	1.00461	1.13883	0.956571	1.30161	1.35283	1.01319	1.19184	1.00652	1.03241	1.0612	1.12592	1.01857	1.00914	1.03355	0.963869	0.991834	0.863639	1.00541	1.10131	1.27341	1.00451	1.19674	1.16218	1.03448	0.970737	1.01939	1.16009
351	chr1	216880565	217451991	1.00451	1.10153	1.34555	1.02757	1.01238	1.16824	0.872843	1.08665	0.98906	1.20539	1.1361	0.952181	0.982652	1.01654	0.654489	1.01857	0.919983	0.843412	1.02521	1.00461	1.13883	0.956571	1.30161	1.35283	1.01319	1.19184	1.00652	1.03241	1.0612	1.12592	1.01857	1.00914	1.03355	0.963869	0.991834	0.863639	1.00541	1.10131	1.27341	1.00451	1.19674	1.16218	1.03448	0.970737	1.01939	1.16009
352	chr1	217451992	218084258	1.00451	1.10153	1.34555	1.02757	1.01238	1.16824	0.872843	1.08665	0.98906	1.20539	1.1361	0.952181	0.982652	1.01654	0.654489	1.01857	0.919983	0.843412	1.02521	1.00461	1.13883	0.956571	1.30161	1.35283	1.01319	1.19184	1.00652	1.03241	1.0612	1.12592	1.01857	1.00914	1.03355	0.963869	0.991834	0.863639	1.00541	1.10131	1.27341	1.00451	1.19674	1.16218	1.03448	0.970737	1.01939	1.16009
353	chr1	218084259	218682061	1.00451	1.10153	1.34555	1.02757	1.01238	1.16824	0.872843	1.08665	0.98906	1.20539	1.1361	0.952181	0.982652	1.01654	0.654489	1.01857	0.919983	0.843412	1.02521	1.00461	1.13883	0.956571	1.30161	1.35283	1.01319	1.19184	1.00652	1.03241	1.0612	1.12592	1.01857	1.00914	1.03355	0.963869	0.991834	0.863639	1.00541	1.10131	1.27341	1.00451	1.19674	1.16218	1.03448	0.970737	1.01939	1.16009
354	chr1	218682062	219258094	1.00451	1.10153	1.34555	1.02757	1.01238	1.16824	0.872843	1.08665	0.98906	1.20539	1.1361	0.952181	0.982652	1.01654	0.654489	1.01857	0.919983	0.843412	1.02521	1.00461	1.13883	0.956571	1.30161	1.35283	1.01319	1.19184	1.00652	1.03241	1.0612	1.12592	1.01857	1.00914	1.03355	0.963869	0.991834	0.863639	1.00541	1.10131	1.27341	1.00451	1.19674	1.16218	1.03448	0.970737	1.01939	1.16009
355	chr1	219258095	219833362	1.00451	1.10153	1.34555	1.02757	1.01238	1.16824	0.872843	1.08665	0.98906	1.20539	1.1361	0.952181	0.982652	1.01654	0.654489	1.01857	0.919983	0.843412	1.02521	1.00461	0.951515	0.956571	1.30161	1.35283	1.01319	1.19184	1.00652	1.03241	1.0612	1.12592	1.01857	1.00914	1.03355	0.963869	0.991834	0.863639	1.00541	1.10131	1.27341	1.00451	1.19674	1.16218	1.03448	0.970737	1.01939	1.16009
356	chr1	219833363	220447539	1.00451	1.10153	1.01654	1.02757	1.01238	1.16824	0.872843	1.08665	0.98906	1.20539	1.1361	0.952181	0.982652	1.01654	0.654489	1.01857	0.919983	0.843412	1.02521	1.00461	0.951515	0.956571	1.30161	1.35283	1.01319	1.19184	1.00652	1.03241	1.0612	1.12592	1.01857	1.00914	1.03355	0.963869	0.991834	0.863639	1.00541	1.10131	1.27341	1.00451	1.19674	1.16218	1.03448	0.970737	1.01939	1.16009
357	chr1	220447540	221025085	1.00451	1.10153	1.01654	1.02757	1.01238	1.16824	0.872843	1.08665	0.98906	1.20539	1.1361	0.952181	0.982652	1.01654	0.654489	1.01857	0.919983	0.843412	1.02521	1.00461	0.951515	0.956571	1.30161	1.35283	1.01319	1.19184	1.00652	1.03241	1.0612	1.12592	1.01857	1.00914	1.03355	0.963869	0.991834	0.863639	1.00541	1.10131	1.27341	1.00451	1.19674	1.16218	1.03448	0.970737	1.01939	1.16009
358	chr1	221025086	221585829	1.00451	1.10153	1.01654	1.02757	1.01238	1.16824	0.872843	1.08665	0.98906	0.862172	1.1361	0.952181	0.982652	1.01654	0.654489	1.01857	0.919983	0.843412	1.02521	1.00461	0.951515	0.956571	1.30161	1.35283	1.01319	1.19184	1.00652	1.03241	1.0612	1.12592	1.01857	1.00914	1.03355	0.963869	0.991834	0.863639	1.00541	1.10131	1.27341	1.00451	1.19674	1.16218	1.03448	0.970737	1.01939	1.16009
359	chr1	221585830	222133484	1.00451	1.10153	1.01654	1.02757	1.01238	1.16824	0.872843	1.08665	0.98906	0.862172	1.1361	0.952181	0.982652	1.01654	0.654489	1.01857	0.919983	0.843412	1.02521	1.00461	0.951515	0.956571	1.30161	1.35283	1.01319	1.19184	1.00652	1.03241	1.0612	1.12592	1.01857	1.00914	1.03355	0.963869	0.991834	0.863639	1.00541	1.10131	1.27341	1.00451	1.19674	1.16218	1.03448	0.970737	1.01939	1.16009
360	chr1	222133485	222667122	1.00451	1.10153	1.01654	1.02757	1.01238	1.16824	0.872843	1.08665	0.98906	0.862172	1.1361	0.952181	0.982652	1.01654	0.654489	1.01857	0.919983	0.843412	1.02521	1.00461	0.951515	0.956571	1.30161	1.35283	1.01319	1.19184	1.00652	1.03241	1.0612	1.12592	1.01857	1.00914	1.03355	0.963869	0.991834	0.863639	1.00541	1.10131	1.27341	1.00451	1.19674	1.16218	1.03448	0.970737	1.01939	1.16009
361	chr1	222667123	223250402	1.00451	1.10153	1.01654	1.02757	1.01238	1.16824	0.872843	1.08665	0.98906	0.862172	1.1361	0.952181	0.982652	1.01654	0.654489	1.01857	0.919983	0.843412	1.02521	1.00461	0.951515	0.956571	1.30161	1.23047	1.01319	1.19184	1.00652	1.03241	1.0612	1.12592	1.01857	1.00914	1.03355	0.963869	0.991834	0.863639	1.00541	1.10131	1.27341	1.00451	1.19674	1.16218	1.03448	0.970737	1.01939	1.16009
362	chr1	223250403	223833477	1.00451	1.10153	1.01654	1.02757	1.01238	1.16824	0.872843	1.08665	0.98906	0.862172	1.1361	0.952181	0.982652	1.01654	0.654489	1.01857	0.919983	0.843412	1.02521	1.00461	0.951515	0.956571	1.30161	1.23047	1.01319	1.19184	1.00652	1.03241	1.0612	1.12592	1.01857	1.00914	1.03355	0.963869	0.991834	0.863639	1.00541	1.10131	1.27341	1.00451	1.19674	1.16218	1.03448	0.970737	1.01939	1.16009
363	chr1	223833478	224337984	1.00451	1.10153	1.01654	1.02757	1.01238	1.16824	0.872843	1.08665	0.98906	0.862172	1.1361	0.952181	0.982652	1.01654	0.654489	1.01857	0.919983	0.843412	1.02521	1.00461	0.951515	1.36479	1.30161	1.23047	1.01319	1.19184	1.00652	1.03241	1.0612	1.12592	1.01857	1.00914	1.03355	1.06983	0.991834	0.863639	1.00541	1.10131	1.27341	1.00451	1.19674	1.16218	1.03448	0.970737	1.01939	1.16009
364	chr1	224337985	224889289	1.00451	1.10153	1.01654	1.02757	1.01238	1.16824	0.872843	1.08665	0.98906	0.862172	1.1361	0.952181	0.982652	1.01654	0.654489	1.01857	0.919983	0.843412	1.02521	1.00461	0.951515	1.36479	1.30161	1.23047	1.01319	1.19184	1.00652	1.03241	1.0612	1.12592	1.01857	1.00914	1.03355	1.06983	0.991834	0.863639	1.00541	1.10131	1.27341	1.00451	1.19674	1.16218	1.03448	0.970737	1.01939	1.16009
365	chr1	224889290	225487471	1.00451	1.10153	1.01654	1.02757	1.01238	1.16824	0.872843	1.08665	0.98906	0.862172	1.1361	0.952181	0.982652	1.01654	0.654489	1.01857	1.38555	0.843412	1.02521	1.00461	0.951515	1.36479	1.30161	1.23047	1.01319	1.19184	1.00652	1.03241	1.0612	1.12592	1.01857	1.00914	1.03355	1.06983	0.991834	0.863639	1.00541	1.10131	1.27341	1.00451	1.19674	1.16218	1.03448	0.970737	1.01939	1.16009
366	chr1	225487472	226048750	1.00451	1.10153	1.01654	1.02757	1.01238	1.16824	0.872843	1.08665	0.98906	0.862172	1.1361	0.952181	0.982652	1.01654	0.654489	1.01857	1.38555	0.843412	1.02521	1.00461	0.951515	1.36479	1.30161	1.23047	1.01319	1.19184	1.00652	1.03241	1.0612	1.12592	1.01857	1.00914	1.03355	1.06983	0.991834	0.863639	1.00541	1.10131	1.27341	1.00451	1.19674	1.16218	1.03448	0.970737	1.01939	1.16009
367	chr1	226048751	226609263	1.00451	1.10153	1.01654	1.02757	1.01238	1.16824	0.872843	1.08665	0.98906	0.862172	1.1361	0.952181	0.982652	1.01654	0.654489	1.01857	1.38555	0.843412	1.02521	1.00461	0.951515	1.36479	1.30161	1.23047	1.01319	1.19184	1.00652	1.03241	1.0612	1.12592	1.01857	1.00914	1.03355	1.06983	0.991834	0.863639	1.00541	1.10131	1.27341	1.00451	1.19674	1.16218	1.03448	0.970737	1.01939	1.16009
368	chr1	226609264	227114271	1.00451	1.10153	1.01654	1.02757	1.01238	1.16824	0.872843	1.08665	0.98906	0.862172	1.1361	0.952181	0.982652	1.01654	0.654489	1.01857	1.38555	0.843412	1.02521	1.00461	0.951515	1.36479	1.30161	1.23047	1.01319	1.19184	1.00652	1.03241	1.0612	1.12592	1.01857	1.00914	1.03355	1.06983	0.991834	0.863639	1.00541	1.10131	1.27341	1.00451	1.19674	1.16218	1.03448	0.970737	1.01939	1.16009
369	chr1	227114272	227724540	1.00451	1.10153	1.01654	1.02757	1.01238	1.16824	0.872843	1.08665	0.98906	0.862172	1.1361	0.952181	0.982652	1.01654	0.654489	1.01857	1.38555	0.843412	1.02521	1.00461	0.951515	1.36479	1.30161	1.23047	1.01319	1.19184	1.00652	1.03241	1.0612	1.12592	1.01857	1.00914	1.03355	1.06983	0.991834	0.863639	1.00541	1.10131	1.27341	1.00451	1.19674	1.16218	1.03448	0.970737	1.01939	1.16009
370	chr1	227724541	228300742	1.00451	1.10153	1.01654	1.02757	1.01238	1.16824	0.872843	1.08665	0.98906	0.862172	1.1361	0.952181	0.982652	1.01654	0.654489	1.01857	1.38555	0.843412	1.02521	1.00461	0.951515	1.36479	1.30161	1.23047	1.01319	1.19184	1.00652	1.03241	1.0612	1.12592	1.01857	1.00914	1.03355	1.06983	0.991834	0.863639	1.00541	1.10131	1.27341	1.00451	1.19674	1.16218	1.03448	0.970737	1.01939	1.16009
371	chr1	228300743	228900282	1.00451	1.10153	1.01654	1.02757	1.01238	1.16824	0.518404	1.08665	0.98906	0.862172	1.1361	0.952181	0.982652	1.01654	0.654489	1.01857	1.38555	0.843412	1.02521	1.00461	0.951515	1.36479	1.30161	1.23047	1.01319	1.19184	1.00652	1.03241	1.0612	1.12592	1.01857	1.00914	1.03355	1.06983	0.991834	0.863639	1.00541	1.10131	1.27341	1.00451	1.19674	1.16218	1.03448	0.970737	1.01939	1.16009
372	chr1	228900283	229413963	1.00451	1.10153	1.01654	1.02757	1.01238	1.16824	0.518404	1.08665	0.98906	0.862172	1.1361	0.952181	0.982652	1.01654	0.654489	1.01857	1.38555	0.843412	1.02521	1.00461	0.951515	1.36479	1.30161	1.23047	1.01319	1.19184	1.00652	1.03241	1.0612	1.12592	1.01857	1.00914	1.03355	1.06983	0.991834	0.863639	1.00541	1.10131	1.27341	1.00451	1.19674	1.16218	1.03448	0.970737	1.01939	1.16009
373	chr1	229413964	229979436	1.00451	1.10153	1.01654	1.02757	1.01238	1.16824	0.518404	1.08665	0.98906	0.862172	1.1361	0.952181	0.982652	1.01654	0.654489	1.01857	1.38555	0.843412	1.02521	1.00461	0.951515	1.36479	1.30161	1.23047	1.01319	1.19184	1.00652	1.03241	1.0612	1.12592	1.01857	1.00914	1.03355	1.06983	0.991834	0.863639	1.00541	1.10131	1.27341	1.00451	1.19674	1.16218	1.03448	0.970737	1.01939	1.16009
374	chr1	229979437	230498643	1.00451	1.10153	1.01654	1.02757	1.01238	1.16824	0.518404	1.08665	0.98906	0.862172	1.1361	0.952181	0.982652	1.01654	0.654489	1.01857	1.38555	0.843412	1.02521	1.00461	0.951515	1.36479	1.30161	1.23047	1.01319	1.19184	1.00652	1.03241	1.0612	1.12592	1.01857	1.00914	1.03355	1.06983	0.991834	0.863639	1.00541	1.10131	1.08752	1.00451	1.19674	1.16218	1.03448	0.970737	1.01939	1.16009
375	chr1	230498644	231022031	1.00451	1.10153	1.01654	1.02757	1.01238	1.16824	0.518404	1.08665	0.98906	0.862172	1.1361	0.952181	0.982652	1.01654	0.654489	1.01857	1.38555	0.843412	1.02521	1.00461	0.951515	0.959157	1.30161	1.23047	1.01319	1.19184	1.00652	1.03241	1.0612	1.12592	1.01857	1.00914	1.03355	1.06983	0.991834	0.863639	1.00541	1.10131	1.08752	1.00451	1.19674	1.16218	1.03448	0.970737	1.01939	1.16009
376	chr1	231022032	231580613	1.00451	1.10153	1.01654	1.02757	1.01238	1.16824	0.518404	1.08665	0.98906	0.862172	1.1361	0.952181	0.982652	1.01654	0.654489	1.01857	1.38555	0.843412	1.02521	1.00461	0.951515	0.959157	1.30161	1.23047	1.01319	1.19184	1.00652	1.03241	1.0612	1.12592	1.01857	1.00914	1.03355	1.06983	0.991834	0.863639	1.00541	1.10131	1.08752	1.00451	1.19674	1.16218	1.03448	0.970737	1.01939	1.16009
377	chr1	231580614	232134928	1.00451	1.10153	1.01654	1.02757	1.01238	1.16824	0.518404	1.08665	0.98906	0.862172	1.1361	0.952181	0.982652	1.01654	0.654489	1.01857	1.38555	0.843412	1.02521	1.00461	0.951515	0.959157	1.30161	1.23047	1.01319	1.19184	1.00652	1.03241	1.0612	1.12592	1.01857	1.00914	1.03355	1.06983	0.991834	0.863639	1.00541	1.10131	1.08752	1.00451	1.19674	1.16218	1.03448	0.970737	1.01939	1.16009
378	chr1	232134929	232692731	1.00451	1.10153	1.01654	1.02757	1.01238	1.16824	0.518404	1.08665	0.98906	0.862172	1.1361	0.952181	0.982652	1.01654	0.654489	1.01857	1.38555	0.843412	1.02521	1.00461	0.951515	0.959157	1.30161	1.23047	1.01319	1.19184	1.00652	1.03241	1.0612	1.12592	1.01857	1.00914	1.03355	1.06983	0.991834	0.863639	1.00541	1.10131	1.08752	1.00451	1.19674	1.16218	1.03448	0.970737	1.01939	1.16009
379	chr1	232692732	233240245	1.00451	1.10153	1.01654	1.02757	1.01238	1.16824	0.518404	1.08665	0.98906	0.862172	1.1361	0.952181	0.982652	1.01654	0.654489	1.01857	1.38555	0.843412	1.02521	1.00461	0.951515	0.959157	1.30161	1.23047	1.01319	1.19184	1.00652	1.03241	1.0612	1.12592	1.01857	1.00914	1.03355	1.06983	0.991834	0.863639	1.00541	1.10131	1.08752	1.00451	1.19674	1.16218	1.03448	0.970737	1.01939	1.16009
380	chr1	233240246	233825485	1.00451	1.10153	1.01654	1.02757	1.01238	1.16824	0.518404	1.08665	0.98906	0.862172	1.1361	0.952181	0.982652	1.01654	0.654489	1.01857	1.38555	0.843412	1.02521	1.00461	0.951515	0.959157	1.30161	1.23047	1.01319	1.19184	1.00652	1.03241	1.0612	1.12592	1.01857	1.00914	1.03355	1.06983	0.991834	0.863639	1.00541	1.10131	1.08752	1.00451	1.19674	1.16218	1.03448	0.970737	1.01939	1.16009
381	chr1	233825486	234420944	1.00451	1.10153	1.01654	1.02757	1.01238	1.16824	0.518404	1.08665	0.98906	0.862172	1.1361	0.952181	0.982652	1.01654	0.654489	1.01857	1.38555	0.843412	1.02521	1.00461	0.951515	0.959157	1.30161	1.23047	1.01319	1.19184	1.00652	1.03241	1.0612	1.12592	1.01857	1.00914	1.03355	1.06983	0.991834	0.863639	1.00541	1.10131	1.08752	1.00451	1.19674	1.16218	1.03448	0.970737	1.01939	1.16009
382	chr1	234420945	234928176	1.00451	1.10153	1.01654	1.02757	1.01238	1.16824	0.518404	1.08665	0.98906	0.862172	1.1361	0.952181	0.982652	1.01654	0.654489	1.01857	1.38555	0.843412	1.02521	1.00461	0.951515	0.959157	1.30161	1.23047	1.01319	1.19184	1.00652	1.03241	1.0612	1.12592	1.01857	1.00914	1.03355	1.06983	0.991834	0.863639	1.00541	1.10131	1.08752	1.00451	1.19674	1.16218	1.03448	0.970737	1.01939	1.16009
383	chr1	234928177	235499192	1.00451	1.10153	1.01654	1.02757	1.01238	1.16824	0.518404	1.08665	0.98906	0.862172	1.1361	0.952181	0.982652	1.01654	0.654489	1.01857	1.38555	0.843412	1.02521	1.00461	0.951515	0.959157	1.30161	1.23047	1.01319	1.19184	1.00652	1.03241	1.0612	1.12592	1.01857	1.00914	1.03355	1.06983	0.991834	0.863639	1.00541	1.10131	1.08752	1.00451	1.19674	1.16218	1.03448	0.970737	1.01939	1.16009
384	chr1	235499193	236083770	1.00451	1.10153	1.01654	1.02757	1.01238	1.16824	0.518404	1.08665	0.98906	0.862172	1.1361	0.952181	0.982652	1.01654	0.654489	1.01857	1.38555	0.843412	1.02521	1.00461	1.13088	0.959157	1.30161	1.23047	1.01319	1.19184	1.00652	1.03241	1.0612	1.12592	1.01857	1.00914	1.03355	1.06983	0.991834	0.863639	1.00541	1.10131	1.08752	1.00451	1.19674	1.16218	1.03448	0.970737	1.01939	1.16009
385	chr1	236083771	236652841	1.00451	1.10153	1.01654	1.02757	1.01238	1.16824	0.518404	1.08665	0.98906	0.862172	1.1361	0.952181	0.982652	1.01654	0.654489	1.01857	1.38555	0.843412	1.02521	1.00461	1.13088	0.959157	1.30161	1.23047	1.01319	1.19184	1.00652	1.03241	1.0612	1.12592	1.01857	1.00914	1.03355	1.06983	0.991834	0.863639	1.00541	1.10131	1.08752	1.00451	1.19674	1.16218	1.03448	0.970737	1.01939	1.16009
386	chr1	236652842	237249595	1.00451	1.10153	1.01654	1.02757	1.01238	1.16824	1.11941	1.08665	0.98906	1.19949	1.1361	0.952181	0.982652	1.01654	0.654489	1.01857	1.38555	0.843412	1.02521	1.00461	1.13088	0.959157	1.30161	1.23047	1.01319	1.19184	1.00652	1.03241	1.0612	1.12592	1.01857	1.00914	1.03355	1.06983	0.991834	0.863639	1.00541	1.10131	1.08752	1.00451	1.19674	1.16218	1.03448	0.970737	1.01939	1.16009
387	chr1	237249596	237888224	1.00451	1.10153	1.01654	1.02757	1.01238	1.16824	1.11941	1.08665	0.98906	1.19949	1.1361	0.952181	0.982652	1.01654	0.870402	1.01857	1.38555	0.843412	1.02521	1.00461	1.13088	0.959157	1.30161	1.23047	1.01319	1.19184	1.00652	1.03241	1.0612	1.12592	1.01857	1.00914	1.03355	1.06983	0.991834	0.863639	1.00541	1.10131	1.08752	1.00451	1.19674	1.16218	1.03448	0.970737	1.01939	1.16009
388	chr1	237888225	238479387	1.00451	1.10153	1.01654	1.02757	1.01238	1.16824	1.11941	1.08665	0.98906	1.19949	1.1361	0.952181	0.982652	1.01654	0.870402	1.01857	1.38555	0.843412	1.02521	1.00461	1.13088	0.959157	1.30161	1.23047	1.01319	1.19184	1.00652	1.03241	1.0612	1.12592	1.01857	1.00914	1.03355	1.06983	0.991834	0.863639	1.00541	1.10131	1.08752	1.00451	1.19674	1.16218	1.03448	0.970737	1.01939	1.16009
389	chr1	238479388	239131960	1.00451	1.10153	1.01654	1.02757	1.01238	1.16824	1.11941	1.08665	0.98906	1.19949	1.1361	0.952181	0.982652	1.01654	0.870402	1.01857	1.38555	0.843412	1.02521	1.00461	1.13088	0.959157	1.30161	1.23047	1.01319	1.19184	1.00652	1.03241	1.0612	1.12592	1.01857	1.00914	1.03355	1.06983	0.991834	0.863639	1.00541	1.10131	1.08752	1.00451	1.19674	1.16218	1.03448	0.970737	1.01939	1.16009
390	chr1	239131961	239729365	1.00451	1.10153	1.01654	1.02757	1.01238	1.16824	1.11941	1.08665	0.98906	1.19949	1.1361	0.952181	0.982652	1.01654	0.870402	1.01857	1.38555	0.843412	1.02521	1.00461	1.13088	0.959157	0.936599	1.23047	1.01319	1.19184	1.00652	1.03241	1.54543	1.12592	1.01857	1.00914	1.03355	1.06983	0.991834	0.863639	1.00541	1.10131	1.39598	1.00451	1.19674	1.16218	1.03448	0.970737	1.01939	1.16009
391	chr1	239729366	240310752	1.00451	1.10153	1.01654	1.02757	1.01238	1.16824	1.11941	1.08665	0.98906	1.19949	0.558277	0.952181	0.982652	1.01654	0.870402	1.01857	1.38555	0.843412	1.02521	1.00461	1.13088	0.959157	0.936599	1.23047	1.01319	1.19184	1.00652	1.03241	1.54543	1.12592	1.01857	1.00914	1.03355	1.06983	0.991834	0.863639	1.00541	1.10131	1.39598	1.00451	1.19674	1.16218	1.03448	0.970737	1.01939	1.16009
392	chr1	240310753	240866943	1.00451	1.10153	1.01654	1.02757	1.01238	1.16824	1.11941	1.08665	0.98906	1.19949	0.558277	0.952181	0.982652	1.01654	0.870402	1.01857	1.38555	0.948949	1.02521	1.00461	1.13088	0.959157	0.936599	1.23047	1.01319	1.19184	1.00652	1.03241	1.54543	1.12592	1.01857	1.00914	1.03355	1.06983	0.991834	0.863639	1.00541	1.10131	1.39598	1.00451	1.19674	1.16218	1.03448	0.970737	1.01939	1.16009
393	chr1	240866944	241452746	1.00451	1.10153	1.01654	1.02757	1.01238	1.16824	1.11941	1.08665	0.98906	1.19949	0.558277	0.952181	0.982652	1.01654	0.870402	1.01857	1.38555	0.948949	1.02521	1.00461	1.13088	0.959157	0.936599	1.23047	1.01319	1.19184	1.00652	1.03241	1.54543	1.12592	1.01857	1.00914	1.03355	1.06983	0.991834	0.863639	1.00541	1.10131	1.39598	1.00451	1.19674	1.16218	1.03448	0.970737	1.01939	1.16009
394	chr1	241452747	242061198	1.00451	1.10153	1.01654	1.02757	1.01238	1.16824	1.11941	1.08665	0.98906	1.19949	0.558277	0.952181	0.982652	1.01654	0.870402	1.01857	1.38555	0.948949	1.02521	1.00461	1.13088	0.959157	0.936599	1.23047	1.01319	1.19184	1.00652	1.03241	1.54543	1.12592	1.01857	1.00914	1.03355	1.06983	0.991834	0.863639	1.00541	1.10131	1.39598	1.00451	1.19674	1.16218	1.03448	0.970737	1.01939	1.16009
395	chr1	242061199	242635007	1.00451	1.10153	1.01654	1.02757	1.01238	1.16824	1.11941	1.08665	0.98906	1.19949	0.558277	0.952181	0.982652	1.01654	0.870402	1.01857	1.38555	0.948949	1.02521	1.00461	1.13088	0.959157	0.936599	1.23047	1.01319	1.19184	1.00652	1.03241	1.54543	1.12592	1.01857	1.00914	1.03355	1.06983	0.991834	0.863639	1.00541	1.10131	1.39598	1.00451	1.19674	1.16218	1.03448	0.970737	1.01939	1.16009
396	chr1	242635008	243217070	1.00451	1.10153	1.01654	1.02757	1.01238	1.16824	1.11941	1.08665	0.98906	1.19949	0.904837	0.952181	0.982652	1.01654	0.870402	1.01857	1.38555	0.948949	1.02521	1.00461	1.13088	0.959157	0.936599	1.23047	1.01319	1.19184	1.00652	1.03241	1.54543	1.12592	1.01857	1.00914	1.03355	1.06983	0.991834	1.01511	1.00541	1.10131	1.39598	1.00451	1.19674	1.16218	1.03448	0.970737	1.01939	1.16009
397	chr1	243217071	243791329	1.00451	1.10153	1.01654	1.02757	1.01238	1.16824	1.11941	1.08665	0.98906	1.19949	0.904837	0.952181	0.982652	1.01654	0.870402	1.01857	1.38555	0.948949	1.02521	1.00461	1.13088	0.959157	0.936599	1.23047	1.01319	1.19184	1.00652	1.03241	1.54543	1.12592	1.01857	1.00914	1.03355	1.06983	0.991834	1.01511	1.00541	1.10131	1.39598	1.00451	1.19674	1.16218	1.03448	0.970737	1.01939	1.16009
398	chr1	243791330	244337701	1.00451	1.10153	1.01654	1.02757	1.01238	1.16824	1.11941	1.08665	0.98906	1.19949	0.904837	0.952181	0.982652	1.01654	0.870402	1.01857	1.38555	0.948949	1.02521	1.00461	1.13088	0.959157	0.936599	1.23047	1.01319	1.19184	1.00652	1.03241	1.54543	1.12592	1.01857	1.00914	1.03355	1.06983	0.991834	1.01511	1.00541	1.10131	1.39598	1.00451	1.19674	1.16218	1.03448	0.970737	1.01939	1.16009
399	chr1	244337702	244909639	1.00451	1.10153	1.01654	1.02757	1.01238	1.16824	1.11941	1.08665	0.98906	1.19949	0.904837	0.952181	0.982652	1.01654	0.684477	1.01857	1.38555	0.948949	1.02521	1.00461	1.13088	0.959157	0.936599	1.23047	1.01319	1.19184	1.00652	1.03241	1.54543	1.12592	1.01857	1.00914	1.03355	1.06983	0.991834	1.01511	1.00541	1.10131	1.39598	1.00451	1.19674	1.16218	1.03448	0.970737	1.01939	1.16009
400	chr1	244909640	245477991	1.00451	1.10153	1.01654	1.02757	1.01238	1.16824	1.11941	1.08665	0.98906	1.19949	0.904837	0.952181	0.982652	1.01654	0.684477	1.01857	1.38555	0.948949	1.02521	1.00461	1.13088	0.959157	0.936599	1.23047	1.01319	1.19184	1.00652	1.03241	1.54543	1.12592	1.01857	1.00914	1.03355	1.06983	0.991834	1.01511	1.00541	1.10131	1.39598	1.00451	1.19674	1.16218	1.03448	0.970737	1.01939	1.16009
401	chr1	245477992	246008178	1.00451	1.10153	1.01654	1.02757	1.01238	1.16824	1.11941	1.08665	0.98906	1.19949	0.904837	0.952181	0.982652	1.01654	0.684477	1.01857	1.38555	0.948949	1.02521	1.00461	1.13088	0.959157	0.936599	1.23047	1.01319	1.19184	1.00652	1.03241	1.54543	1.12592	1.01857	1.00914	1.03355	1.06983	0.991834	1.01511	1.00541	1.10131	1.39598	1.00451	1.19674	1.16218	1.03448	0.970737	1.01939	1.16009
402	chr1	246008179	246605588	1.00451	1.10153	1.01654	1.02757	1.01238	1.16824	1.11941	1.08665	0.98906	1.19949	0.904837	0.952181	0.982652	1.01654	0.684477	1.01857	1.38555	0.948949	1.02521	1.00461	1.13088	0.959157	0.936599	1.23047	1.01319	1.19184	1.00652	1.03241	1.54543	1.12592	1.01857	1.00914	1.03355	1.06983	0.991834	1.01511	1.00541	1.10131	1.39598	1.00451	1.19674	1.16218	1.03448	0.970737	1.01939	1.16009
403	chr1	246605589	247217124	1.00451	1.10153	1.01654	1.02757	1.01238	1.16824	1.11941	1.08665	0.98906	1.19949	0.904837	0.952181	0.982652	1.01654	0.684477	1.01857	1.38555	0.948949	1.02521	1.00461	1.13088	0.959157	0.936599	1.23047	1.01319	1.19184	1.00652	1.03241	1.54543	1.12592	1.01857	1.00914	1.03355	1.06983	0.991834	1.01511	1.00541	1.10131	1.39598	1.00451	1.19674	1.16218	1.03448	0.970737	1.01939	1.16009
404	chr1	247217125	247822196	1.00451	1.10153	1.01654	1.02757	1.01238	1.16824	1.11941	1.08665	0.98906	1.19949	0.904837	0.952181	0.982652	1.01654	0.684477	1.01857	1.38555	0.948949	1.02521	1.00461	1.13088	0.959157	0.936599	1.23047	1.01319	1.19184	1.00652	1.03241	1.54543	1.12592	1.01857	1.00914	1.03355	1.06983	0.991834	1.01511	1.00541	1.10131	1.39598	1.00451	1.19674	1.16218	1.03448	0.970737	1.01939	1.16009
405	chr1	247822197	248521468	1.00451	1.10153	1.01654	1.02757	1.01238	1.16824	1.11941	1.08665	0.98906	1.19949	0.904837	0.952181	0.982652	1.01654	0.684477	1.01857	1.38555	0.948949	1.02521	1.00461	1.13088	0.959157	0.936599	1.23047	1.01319	1.19184	1.00652	1.03241	1.54543	1.12592	1.01857	1.00914	1.03355	1.06983	0.991834	1.01511	1.00541	1.10131	1.39598	1.00451	1.19674	1.16218	1.03448	0.970737	1.01939	1.16009
406	chr1	248521469	249250621	1.00451	1.10153	1.01654	1.02757	1.01238	1.16824	1.11941	1.08665	0.98906	1.19949	0.904837	0.952181	0.982652	1.01654	0.684477	1.01857	1.38555	0.948949	1.02521	1.00461	1.13088	0.959157	0.936599	1.23047	1.01319	1.19184	1.00652	1.03241	1.54543	1.12592	1.01857	1.00914	1.03355	1.06983	0.991834	1.01511	1.00541	1.10131	1.39598	1.00451	1.19674	1.16218	1.03448	0.970737	1.01939	1.16009
407	chr2	1	612530	0.992727	0.91174	0.92441	0.979709	0.981474	0.498725	0.806622	1.09669	1.00371	0.888074	1.26719	1.00924	1.04133	1.02501	1.03707	0.997104	1.10087	0.877656	0.9996	0.9993	0.779424	0.681813	1.1184	0.823164	1.04081	0.990644	1.00441	1.02768	1.02368	1.1587	1.12176	0.946107	1.0028	1.04248	1.0319	0.78836	1.34004	0.556772	0.986196	0.994913	0.776313	0.928857	1.01939	1.14077	1.12637	1.12042
408	chr2	612531	1250706	0.992727	0.91174	0.92441	0.979709	0.981474	0.498725	0.806622	1.09669	1.00371	0.888074	1.26719	1.00924	1.04133	1.02501	1.03707	0.997104	1.10087	0.877656	0.9996	0.9993	0.779424	0.681813	1.1184	0.823164	1.04081	0.990644	1.00441	1.02768	1.02368	1.1587	1.12176	0.946107	1.0028	1.04248	1.0319	0.78836	1.34004	0.556772	0.986196	0.994913	0.776313	0.928857	1.01939	1.14077	1.12637	1.12042
409	chr2	1250707	1830041	0.992727	0.91174	0.92441	0.979709	0.981474	0.498725	0.806622	1.09669	1.00371	0.643007	1.26719	1.00924	1.04133	1.02501	1.03707	0.997104	1.10087	0.877656	0.9996	0.9993	0.779424	0.681813	1.1184	0.823164	1.04081	0.990644	1.00441	1.02768	1.02368	1.1587	1.12176	0.946107	1.0028	1.04248	1.0319	0.78836	1.34004	0.556772	0.986196	0.994913	0.776313	0.928857	1.01939	1.14077	1.12637	1.12042
410	chr2	1830042	2387486	0.992727	0.91174	0.92441	0.979709	0.981474	0.498725	0.806622	1.09669	1.00371	0.643007	1.26719	1.00924	1.04133	1.02501	1.03707	0.997104	1.10087	0.877656	0.9996	0.9993	0.779424	0.681813	1.1184	0.823164	1.04081	0.990644	1.00441	1.02768	1.02368	1.1587	1.12176	0.946107	1.0028	1.04248	1.0319	0.78836	1.34004	0.556772	0.986196	0.994913	0.776313	1.24583	1.01939	1.14077	1.12637	1.12042
411	chr2	2387487	2961455	0.992727	0.91174	0.92441	0.979709	0.981474	0.830191	0.806622	1.09669	1.00371	0.643007	1.26719	1.00924	1.04133	1.02501	1.03707	0.997104	1.10087	1.07262	0.9996	0.9993	0.779424	0.681813	1.1184	0.823164	1.04081	0.990644	1.00441	1.02768	1.02368	1.1587	1.12176	0.946107	1.0028	1.04248	1.0319	0.78836	1.34004	0.556772	0.986196	0.994913	0.776313	1.24583	1.01939	1.14077	1.12637	1.12042
412	chr2	2961456	3587185	0.992727	0.91174	0.92441	0.979709	0.981474	0.830191	0.806622	1.09669	1.00371	0.643007	1.26719	1.00924	1.04133	1.02501	1.03707	0.997104	1.10087	1.07262	0.9996	0.9993	0.779424	1.02163	1.1184	0.823164	1.04081	0.990644	1.00441	1.02768	1.02368	1.1587	1.12176	0.946107	1.0028	1.04248	1.0319	0.78836	1.34004	0.556772	0.986196	0.994913	0.776313	1.24583	1.01939	1.14077	1.12637	1.12042
413	chr2	3587186	4161088	0.992727	0.91174	0.92441	0.979709	0.981474	0.830191	0.806622	1.09669	1.00371	0.643007	1.26719	1.00924	1.04133	1.02501	1.03707	0.997104	1.10087	1.07262	0.9996	0.9993	0.779424	1.02163	1.1184	0.823164	1.04081	0.990644	1.00441	1.02768	1.02368	1.1587	1.12176	0.946107	1.0028	1.04248	1.0319	0.78836	1.34004	0.556772	0.986196	0.994913	0.776313	1.24583	1.01939	1.14077	1.12637	1.12042
414	chr2	4161089	4792342	0.992727	0.91174	0.92441	0.979709	0.981474	0.830191	1.07562	1.09669	1.00371	0.643007	1.26719	1.00924	1.04133	1.02501	1.03707	0.997104	1.10087	1.07262	0.9996	0.9993	0.779424	1.02163	1.1184	0.823164	1.04081	0.990644	1.00441	1.02768	1.02368	1.1587	1.12176	0.946107	1.0028	1.04248	1.0319	0.78836	1.34004	0.556772	0.986196	0.994913	0.776313	1.24583	1.01939	1.14077	1.12637	1.12042
415	chr2	4792343	5530792	0.992727	0.91174	0.92441	0.979709	0.981474	0.830191	1.07562	1.09669	1.00371	0.643007	1.26719	1.00924	1.04133	1.02501	1.03707	0.997104	1.10087	1.07262	0.9996	0.9993	0.779424	1.02163	1.1184	0.823164	1.04081	0.990644	1.00441	1.02768	1.02368	1.1587	1.12176	0.946107	1.0028	1.04248	1.0319	0.78836	1.34004	0.556772	0.986196	0.994913	0.776313	1.24583	1.01939	1.14077	1.12637	1.12042
416	chr2	5530793	6119991	0.992727	0.91174	0.92441	0.979709	0.981474	0.830191	1.07562	1.09669	1.00371	0.643007	1.26719	1.00924	1.04133	1.02501	1.03707	0.997104	1.10087	1.07262	0.9996	0.9993	0.779424	1.02163	1.1184	0.823164	1.04081	0.990644	1.00441	1.02768	1.02368	1.1587	1.12176	0.946107	1.0028	1.04248	1.0319	0.78836	1.34004	0.556772	0.986196	0.994913	0.776313	1.24583	1.01939	1.14077	1.12637	1.12042
417	chr2	6119992	6723426	0.992727	0.91174	0.92441	0.979709	0.981474	0.830191	1.07562	1.09669	1.00371	0.643007	1.26719	1.00924	1.04133	1.02501	1.03707	0.997104	1.10087	1.07262	0.9996	0.9993	0.779424	1.02163	1.1184	0.823164	1.04081	0.990644	1.00441	1.02768	1.02368	1.1587	1.12176	0.946107	1.0028	1.04248	1.0319	0.78836	1.34004	0.556772	0.986196	0.994913	0.776313	1.24583	1.01939	1.14077	1.12637	1.12042
418	chr2	6723427	7275270	0.992727	0.91174	0.92441	0.979709	0.981474	0.830191	1.07562	1.09669	1.00371	0.643007	1.26719	1.00924	1.04133	1.02501	1.03707	0.997104	1.10087	1.07262	0.9996	0.9993	0.779424	1.02163	1.1184	0.823164	1.04081	0.990644	1.00441	1.02768	1.02368	1.1587	1.12176	0.946107	1.0028	1.04248	1.0319	0.78836	1.34004	0.556772	0.986196	0.994913	0.776313	1.24583	1.01939	1.14077	1.12637	1.12042
419	chr2	7275271	7842626	0.992727	0.91174	0.92441	0.979709	0.981474	0.830191	1.07562	1.09669	1.00371	0.643007	1.26719	1.00924	1.04133	1.02501	1.03707	0.997104	1.10087	1.07262	0.9996	0.9993	0.779424	1.02163	1.1184	0.823164	1.04081	0.990644	1.00441	1.02768	1.02368	1.1587	1.12176	0.946107	1.0028	1.04248	1.0319	0.78836	1.34004	0.556772	0.986196	0.994913	0.776313	1.24583	1.01939	1.14077	1.12637	1.12042
420	chr2	7842627	8386014	0.992727	0.91174	0.92441	0.979709	0.981474	0.830191	1.07562	1.09669	1.00371	0.643007	1.26719	1.00924	1.04133	1.02501	1.03707	0.997104	1.10087	1.07262	0.9996	0.9993	0.779424	1.02163	1.1184	0.823164	1.04081	0.990644	1.00441	1.02768	1.02368	1.1587	1.12176	0.946107	1.0028	1.04248	1.0319	0.78836	1.34004	0.556772	0.986196	0.994913	0.776313	1.24583	1.01939	1.14077	1.12637	1.12042
421	chr2	8386015	8903811	0.992727	0.91174	0.92441	0.979709	0.981474	0.830191	1.07562	1.09669	1.00371	0.643007	1.26719	1.00924	1.04133	1.02501	1.03707	0.997104	1.10087	1.07262	0.9996	0.9993	0.779424	1.02163	1.1184	0.823164	1.04081	0.990644	1.00441	1.02768	1.02368	1.1587	1.12176	0.946107	1.0028	1.04248	1.0319	0.78836	1.34004	0.556772	0.986196	0.994913	0.776313	1.24583	1.01939	1.14077	1.12637	1.12042
422	chr2	8903812	9430458	0.992727	0.91174	0.92441	0.979709	0.981474	0.830191	1.07562	1.09669	1.00371	0.922839	1.26719	1.00924	1.04133	1.02501	1.03707	0.997104	1.10087	1.07262	0.9996	0.9993	0.779424	1.02163	1.1184	0.823164	1.04081	0.990644	1.00441	1.02768	1.02368	1.1587	1.12176	0.946107	1.0028	1.04248	1.0319	0.78836	1.34004	0.556772	0.986196	0.994913	0.776313	1.24583	1.01939	1.14077	1.12637	1.12042
423	chr2	9430459	9945760	0.992727	0.91174	0.92441	0.979709	0.981474	0.830191	1.07562	1.09669	1.00371	0.922839	1.26719	1.00924	1.04133	1.02501	1.03707	0.997104	1.10087	1.07262	0.9996	0.9993	0.779424	1.02163	1.1184	0.823164	1.04081	0.990644	1.00441	1.02768	1.02368	1.1587	1.12176	0.946107	1.0028	1.04248	1.0319	1.17939	1.34004	0.556772	0.986196	0.994913	0.776313	0.949804	1.01939	1.14077	1.12637	1.12042
424	chr2	9945761	10475708	0.992727	0.91174	0.92441	0.979709	0.981474	0.830191	1.07562	1.09669	1.00371	0.922839	1.26719	1.00924	1.04133	1.02501	1.03707	0.997104	1.10087	1.07262	0.9996	0.9993	0.779424	1.02163	1.1184	0.823164	1.04081	0.990644	1.00441	1.02768	1.02368	1.1587	1.12176	0.946107	1.0028	1.04248	1.0319	1.17939	1.34004	0.556772	0.986196	0.994913	0.776313	0.949804	1.01939	1.14077	1.12637	1.12042
425	chr2	10475709	11003433	0.992727	0.91174	0.92441	0.979709	0.981474	0.830191	1.07562	1.09669	1.00371	0.922839	1.26719	1.00924	1.04133	1.02501	1.03707	0.997104	1.10087	1.07262	0.9996	0.9993	0.779424	1.02163	1.1184	0.823164	1.04081	0.990644	1.00441	1.02768	1.02368	1.1587	1.12176	0.946107	1.0028	1.04248	1.0319	1.17939	1.34004	0.556772	0.986196	0.994913	0.776313	0.456028	1.01939	1.14077	1.12637	1.12042
426	chr2	11003434	11557325	0.992727	0.91174	0.92441	0.979709	0.981474	0.830191	1.07562	1.09669	1.00371	0.922839	1.26719	1.00924	1.04133	1.02501	1.03707	0.997104	1.10087	1.07262	0.9996	0.9993	0.779424	1.02163	1.1184	0.823164	1.04081	0.990644	1.00441	1.02768	1.02368	1.1587	1.12176	0.946107	1.0028	1.04248	1.0319	1.17939	1.34004	0.556772	0.38678	0.994913	0.776313	0.456028	1.01939	1.14077	1.12637	1.12042
427	chr2	11557326	12103599	0.992727	0.280242	0.92441	0.979709	0.981474	0.830191	1.07562	1.09669	1.00371	0.922839	1.26719	1.00924	1.04133	1.02501	1.03707	0.997104	1.10087	1.07262	0.9996	0.9993	0.779424	1.02163	1.1184	0.823164	1.04081	0.990644	1.00441	1.02768	1.02368	1.1587	1.12176	0.946107	1.0028	1.04248	1.0319	1.17939	1.34004	0.318765	0.38678	0.994913	0.776313	0.456028	1.01939	1.14077	1.12637	1.12042
428	chr2	12103600	12658986	0.992727	0.280242	0.92441	0.979709	0.981474	0.830191	1.07562	1.09669	1.42604	0.922839	1.26719	1.00924	1.04133	1.02501	1.03707	0.997104	1.10087	1.07262	0.9996	0.9993	0.779424	1.02163	1.1184	0.823164	1.04081	0.990644	1.00441	1.02768	1.02368	1.1587	1.12176	0.946107	1.0028	1.04248	1.0319	1.17939	1.34004	0.318765	0.38678	0.994913	0.776313	0.456028	1.01939	1.14077	1.12637	1.12042
429	chr2	12658987	13221735	0.992727	0.280242	0.92441	0.979709	0.981474	0.830191	1.07562	1.09669	1.42604	0.922839	1.26719	1.00924	1.04133	1.02501	1.03707	0.997104	1.10087	1.07262	0.9996	0.9993	0.68619	1.02163	1.1184	0.823164	1.04081	0.990644	1.00441	1.02768	1.02368	1.1587	1.12176	0.946107	1.0028	1.04248	1.0319	1.17939	1.34004	0.318765	0.38678	0.994913	0.776313	0.456028	1.01939	1.14077	1.12637	1.12042
430	chr2	13221736	13883879	0.992727	0.280242	0.92441	0.979709	0.981474	0.830191	1.07562	1.09669	1.42604	0.922839	1.26719	1.00924	1.04133	1.02501	1.03707	0.997104	1.10087	1.07262	0.9996	0.9993	0.68619	1.02163	1.1184	0.823164	1.04081	0.990644	1.00441	1.02768	1.02368	1.1587	1.12176	0.946107	1.0028	1.04248	1.0319	1.17939	1.34004	0.318765	0.38678	0.994913	0.776313	0.714695	1.01939	1.14077	1.12637	1.12042
431	chr2	13883880	14533355	0.992727	0.280242	0.92441	0.979709	0.981474	0.830191	1.07562	1.09669	1.42604	0.922839	1.5121	1.00924	1.04133	1.02501	1.03707	0.997104	1.10087	1.07262	0.9996	0.9993	0.68619	1.02163	1.1184	0.823164	1.04081	0.990644	1.00441	1.02768	1.02368	1.1587	1.12176	0.946107	1.0028	1.04248	1.0319	1.17939	1.34004	0.318765	0.38678	0.994913	0.776313	0.714695	1.01939	1.14077	1.12637	1.12042
432	chr2	14533356	15114507	0.992727	0.280242	0.92441	0.979709	0.981474	0.830191	1.07562	1.09669	1.42604	0.922839	1.5121	1.00924	1.04133	1.02501	1.03707	0.997104	1.10087	1.07262	0.9996	0.9993	0.68619	0.68674	1.1184	0.823164	1.04081	0.990644	1.00441	1.02768	1.02368	1.1587	1.12176	0.946107	1.0028	1.04248	1.0319	1.17939	1.34004	0.318765	0.38678	0.994913	0.776313	0.714695	1.01939	1.14077	1.12637	1.12042
433	chr2	15114508	15718462	0.992727	0.867188	0.92441	0.979709	0.981474	0.830191	1.07562	1.09669	1.42604	0.922839	1.5121	1.00924	1.04133	1.02501	1.03707	0.997104	1.10087	1.07262	0.9996	0.9993	0.68619	0.68674	1.1184	0.823164	1.04081	0.990644	1.00441	1.02768	1.02368	1.1587	1.12176	0.946107	1.0028	1.04248	1.0319	1.17939	1.34004	0.581758	0.91512	0.994913	0.776313	0.714695	1.01939	1.14077	1.12637	1.12042
434	chr2	15718463	16266132	0.992727	0.867188	0.92441	0.979709	0.981474	0.830191	1.07562	1.09669	1.42604	1.06769	1.5121	1.00924	1.04133	1.02501	1.03707	0.997104	1.10087	1.07262	0.9996	0.9993	0.68619	0.68674	1.1184	0.823164	1.04081	0.990644	1.00441	1.02768	1.02368	1.1587	1.12176	0.946107	1.0028	1.04248	1.0319	1.17939	1.34004	0.581758	0.91512	0.994913	0.776313	0.714695	1.01939	1.14077	1.12637	1.12042
435	chr2	16266133	16886870	0.992727	0.867188	0.92441	0.979709	0.981474	0.830191	1.07562	1.09669	1.42604	1.06769	1.5121	1.00924	1.04133	1.02501	1.03707	0.997104	1.10087	1.07262	0.9996	0.9993	0.68619	0.68674	1.1184	0.823164	1.04081	0.990644	1.00441	1.02768	1.02368	1.1587	1.12176	0.946107	1.0028	1.04248	1.0319	1.17939	1.34004	0.581758	0.91512	0.994913	0.776313	0.714695	1.01939	1.14077	1.12637	1.12042
436	chr2	16886871	17478741	0.992727	0.867188	0.92441	0.979709	0.981474	0.830191	1.07562	1.09669	1.42604	1.06769	1.5121	1.00924	1.04133	1.02501	1.03707	0.997104	1.10087	1.07262	0.9996	0.9993	0.68619	0.68674	1.1184	0.823164	1.04081	0.990644	1.00441	1.02768	1.02368	1.1587	1.12176	0.946107	1.0028	1.04248	1.0319	1.17939	1.34004	0.581758	0.91512	0.994913	0.776313	0.714695	1.01939	1.14077	1.12637	1.12042
437	chr2	17478742	18071058	0.992727	0.867188	0.92441	0.979709	0.981474	0.830191	1.07562	1.09669	1.15039	1.06769	1.5121	1.00924	1.04133	1.02501	1.03707	0.997104	1.10087	1.07262	0.9996	0.9993	0.68619	0.68674	1.1184	0.823164	1.04081	0.990644	1.00441	1.02768	1.02368	1.1587	1.12176	0.946107	1.0028	1.04248	1.0319	1.17939	1.34004	0.581758	0.91512	0.994913	0.776313	0.714695	1.01939	1.14077	1.12637	1.12042
438	chr2	18071059	18637274	0.992727	0.867188	0.92441	0.979709	0.981474	1.15385	1.07562	1.09669	1.15039	1.06769	1.5121	1.00924	1.04133	1.02501	1.03707	0.997104	1.10087	1.07262	0.9996	0.9993	0.68619	0.68674	1.1184	0.823164	1.04081	0.990644	1.00441	1.02768	1.02368	1.1587	1.00431	0.946107	1.0028	1.04248	1.0319	1.17939	1.34004	0.581758	0.91512	0.994913	0.776313	0.714695	1.01939	1.14077	1.12637	1.12042
439	chr2	18637275	19207449	0.992727	0.867188	0.92441	0.979709	0.981474	1.15385	1.07562	1.09669	1.15039	1.06769	1.5121	1.00924	1.04133	1.02501	1.03707	0.997104	1.10087	1.07262	0.9996	0.9993	0.68619	0.68674	1.1184	0.823164	1.04081	0.990644	1.00441	1.02768	1.02368	1.1587	1.00431	0.946107	1.0028	1.04248	1.0319	1.17939	1.34004	0.581758	0.91512	0.994913	0.776313	0.714695	1.01939	1.14077	1.12637	1.12042
440	chr2	19207450	19763965	0.992727	0.867188	0.92441	0.979709	0.981474	1.15385	1.07562	1.09669	1.15039	1.06769	1.5121	1.00924	1.04133	1.02501	1.03707	0.997104	1.10087	1.07262	0.9996	0.9993	0.68619	0.68674	1.1184	0.823164	1.04081	0.990644	1.00441	1.02768	1.02368	1.1587	1.00431	0.946107	1.0028	1.04248	1.0319	1.17939	1.34004	0.581758	0.91512	0.994913	0.776313	0.714695	1.01939	1.14077	1.12637	1.12042
441	chr2	19763966	20303189	0.992727	0.867188	0.92441	0.979709	0.981474	1.15385	1.07562	1.09669	1.15039	1.06769	1.5121	1.00924	1.04133	1.02501	0.80501	0.997104	0.514634	1.07262	0.9996	0.9993	0.68619	0.68674	1.1184	0.823164	1.04081	0.990644	1.00441	1.02768	1.02368	1.1587	1.00431	0.946107	1.0028	1.04248	1.0319	1.17939	1.34004	0.581758	0.91512	0.994913	0.776313	0.714695	1.01939	1.14077	1.12637	1.12042
442	chr2	20303190	20818382	0.992727	0.867188	0.92441	0.979709	0.981474	1.15385	1.07562	1.09669	1.15039	1.06769	1.21641	1.00924	1.04133	1.02501	0.80501	0.997104	0.514634	1.07262	0.9996	0.9993	0.68619	0.68674	1.1184	0.823164	1.04081	0.990644	1.00441	1.02768	1.02368	1.1587	1.00431	0.946107	1.0028	1.04248	1.0319	1.17939	1.34004	0.581758	0.91512	0.994913	0.776313	0.714695	1.01939	1.14077	1.12637	1.12042
443	chr2	20818383	21397363	0.992727	0.867188	0.92441	0.979709	0.981474	1.15385	1.07562	1.09669	1.15039	1.4259	1.21641	1.00924	1.04133	1.02501	0.80501	0.997104	0.514634	1.07262	0.9996	0.9993	0.68619	0.68674	1.1184	0.823164	1.04081	0.990644	1.00441	1.02768	1.02368	1.1587	1.00431	0.946107	1.0028	1.04248	1.0319	1.17939	1.34004	0.581758	0.91512	0.994913	0.776313	0.714695	1.01939	1.14077	1.12637	1.12042
444	chr2	21397364	21992730	0.992727	0.867188	0.92441	0.979709	0.981474	1.15385	1.07562	1.09669	1.15039	1.4259	1.21641	1.00924	1.04133	1.02501	0.80501	0.997104	0.514634	1.07262	0.9996	0.9993	0.68619	0.68674	1.1184	0.823164	1.04081	0.990644	1.00441	1.02768	1.02368	1.1587	1.00431	0.946107	1.0028	1.04248	1.0319	1.17939	1.34004	0.581758	0.91512	0.994913	0.776313	0.714695	1.01939	1.14077	1.12637	1.12042
445	chr2	21992731	22606020	0.992727	0.867188	0.92441	0.979709	0.981474	1.15385	1.07562	1.09669	0.831021	1.4259	1.21641	1.00924	1.04133	1.02501	0.80501	0.997104	0.514634	1.07262	0.9996	0.9993	0.68619	0.68674	1.1184	0.823164	1.04081	0.990644	1.00441	1.02768	1.02368	1.1587	1.00431	0.946107	1.0028	1.04248	1.0319	1.17939	1.34004	0.581758	0.627319	0.994913	0.776313	0.714695	1.01939	1.14077	1.12637	1.12042
446	chr2	22606021	23204886	0.992727	0.867188	0.92441	0.979709	0.981474	1.15385	1.07562	1.09669	0.831021	1.4259	1.21641	1.00924	1.04133	1.02501	0.80501	0.997104	0.514634	1.07262	0.9996	0.9993	0.68619	0.68674	1.1184	0.823164	1.04081	0.990644	1.00441	1.02768	1.02368	1.1587	1.00431	0.946107	1.0028	1.04248	1.0319	1.17939	1.34004	0.581758	0.627319	0.994913	0.776313	0.714695	1.01939	1.14077	1.12637	1.12042
447	chr2	23204887	23739795	0.992727	0.867188	0.92441	0.979709	0.981474	1.15385	1.07562	1.09669	0.831021	1.4259	1.21641	1.00924	1.04133	1.02501	0.80501	0.997104	0.514634	1.07262	0.9996	0.9993	0.68619	0.68674	1.1184	0.823164	1.04081	0.990644	1.00441	1.02768	1.02368	1.1587	1.00431	0.946107	1.0028	1.04248	1.0319	1.17939	1.34004	0.581758	0.627319	0.994913	0.776313	0.714695	1.01939	1.14077	1.12637	1.12042
448	chr2	23739796	24307720	0.992727	0.867188	0.92441	0.979709	0.981474	1.15385	1.07562	1.09669	0.831021	1.14694	1.21641	1.00924	1.04133	1.02501	0.575739	0.997104	0.514634	1.07262	0.9996	0.9993	0.68619	0.68674	1.1184	0.823164	1.04081	0.990644	1.00441	1.02768	1.02368	1.1587	1.00431	0.946107	1.0028	1.04248	1.0319	1.17939	1.34004	0.581758	0.627319	0.994913	0.776313	0.714695	1.01939	1.14077	1.12637	1.12042
449	chr2	24307721	24887019	0.992727	0.867188	0.92441	0.979709	0.981474	1.15385	1.07562	1.09669	0.831021	1.14694	1.21641	1.00924	1.04133	1.02501	0.575739	0.848487	0.514634	1.07262	0.9996	0.9993	0.68619	0.68674	1.1184	0.823164	1.04081	0.990644	1.00441	1.02768	1.02368	1.1587	1.00431	0.946107	1.0028	1.04248	1.0319	1.17939	1.34004	0.581758	0.939131	0.994913	0.776313	0.714695	1.01939	1.14077	1.12637	1.12042
450	chr2	24887020	25449427	0.992727	0.867188	0.92441	0.979709	0.981474	1.15385	1.07562	1.09669	0.831021	1.14694	1.21641	1.00924	1.04133	1.02501	0.575739	0.848487	0.514634	1.07262	0.9996	0.9993	0.68619	0.68674	1.1184	0.823164	1.04081	0.990644	1.00441	1.02768	1.02368	1.1587	1.00431	0.946107	1.0028	1.04248	1.0319	1.17939	1.34004	0.581758	0.939131	0.994913	0.776313	0.714695	1.01939	1.14077	1.12637	1.12042
451	chr2	25449428	26000393	0.992727	0.867188	0.92441	0.979709	0.981474	1.15385	1.07562	1.09669	0.831021	0.923301	1.21641	1.00924	1.04133	1.02501	0.575739	0.848487	0.86988	1.07262	0.9996	0.9993	0.68619	0.68674	1.1184	0.823164	1.04081	0.990644	1.00441	1.02768	1.02368	1.1587	1.00431	0.946107	1.0028	1.04248	1.0319	1.17939	1.34004	0.581758	0.939131	0.994913	0.776313	0.714695	1.01939	1.14077	1.12637	1.12042
452	chr2	26000394	26577169	0.992727	0.867188	0.92441	0.979709	0.981474	1.15385	1.07562	1.09669	0.831021	0.923301	1.21641	1.00924	1.04133	1.02501	0.575739	0.848487	0.86988	1.07262	0.9996	0.9993	0.68619	0.68674	1.1184	0.823164	1.04081	0.990644	1.00441	1.02768	1.02368	1.1587	1.00431	0.946107	1.0028	1.04248	1.0319	1.17939	1.34004	0.581758	0.939131	0.994913	0.776313	0.714695	1.01939	1.14077	1.12637	1.12042
453	chr2	26577170	27100948	0.992727	0.867188	0.92441	0.979709	0.981474	1.15385	1.07562	1.09669	0.831021	0.923301	1.21641	1.00924	1.04133	1.02501	0.575739	0.848487	0.86988	1.07262	0.9996	0.9993	0.68619	0.68674	1.1184	0.823164	1.04081	0.990644	1.00441	1.02768	1.02368	1.1587	1.00431	0.946107	1.0028	1.04248	1.0319	1.17939	1.34004	0.581758	0.939131	0.994913	0.776313	0.714695	1.01939	1.14077	1.12637	1.12042
454	chr2	27100949	27663459	0.992727	0.867188	0.92441	0.979709	0.981474	0.854277	1.07562	1.09669	0.831021	0.923301	1.21641	1.00924	1.04133	1.02501	1.03935	0.848487	0.86988	1.07262	0.9996	0.9993	0.68619	0.68674	1.1184	0.823164	1.04081	0.990644	1.00441	1.02768	1.02368	1.1587	1.00431	0.946107	1.0028	1.04248	1.0319	1.17939	1.34004	0.581758	0.939131	0.994913	0.776313	1.04415	1.01939	1.14077	1.12637	1.12042
455	chr2	27663460	28239818	0.992727	0.867188	0.92441	0.979709	0.981474	0.854277	1.07562	1.09669	0.831021	0.923301	1.21641	1.00924	1.04133	1.02501	1.03935	0.848487	0.86988	1.07262	0.9996	0.9993	0.68619	0.68674	1.1184	0.823164	1.04081	0.990644	1.00441	1.02768	1.02368	1.1587	1.00431	0.946107	1.0028	1.04248	1.0319	1.17939	1.34004	0.581758	0.939131	0.994913	0.776313	1.04415	1.01939	1.14077	1.12637	1.12042
456	chr2	28239819	28771162	0.992727	0.867188	0.92441	0.979709	0.981474	0.854277	1.07562	1.09669	1.10054	0.923301	1.21641	1.00924	1.04133	1.02501	1.03935	0.848487	0.86988	1.07262	0.9996	0.9993	0.68619	0.68674	1.1184	0.823164	1.04081	0.990644	1.00441	1.02768	1.02368	1.1587	1.00431	0.946107	1.0028	1.04248	1.0319	1.17939	1.34004	0.581758	0.939131	0.994913	0.776313	1.04415	1.01939	1.14077	1.12637	1.12042
457	chr2	28771163	29307027	0.992727	0.867188	0.92441	0.979709	0.981474	0.854277	1.07562	1.09669	1.10054	0.923301	1.21641	1.00924	1.04133	1.02501	1.03935	0.848487	0.86988	1.07262	0.9996	0.9993	0.68619	0.68674	1.1184	0.823164	1.04081	0.990644	1.00441	1.02768	1.02368	1.1587	1.00431	0.946107	1.0028	1.04248	1.0319	1.17939	1.34004	0.581758	0.939131	0.994913	0.776313	1.04415	1.01939	1.14077	1.12637	1.12042
458	chr2	29307028	29816036	0.992727	0.867188	0.92441	0.979709	0.981474	0.854277	1.07562	1.09669	1.10054	0.923301	1.21641	1.00924	1.04133	1.02501	1.03935	0.848487	0.86988	1.07262	0.9996	0.9993	0.68619	0.68674	1.1184	0.823164	1.04081	0.990644	1.00441	1.02768	1.02368	1.1587	1.00431	0.946107	1.0028	1.04248	1.0319	1.17939	1.34004	0.581758	0.939131	0.994913	0.776313	1.04415	1.01939	1.14077	1.12637	1.12042
459	chr2	29816037	30341973	0.992727	0.867188	0.92441	0.979709	0.981474	0.854277	1.07562	1.09669	1.10054	0.923301	1.21641	1.00924	1.04133	1.02501	1.03935	0.848487	0.86988	1.07262	0.9996	0.9993	0.68619	0.68674	1.1184	0.823164	1.04081	0.990644	1.00441	1.02768	1.02368	1.1587	1.00431	0.946107	1.0028	1.04248	1.0319	1.17939	1.34004	0.581758	0.939131	0.994913	0.776313	1.04415	1.01939	1.14077	1.12637	1.12042
460	chr2	30341974	30864415	0.992727	0.867188	0.92441	0.979709	0.981474	0.854277	1.07562	1.09669	1.10054	0.923301	1.21641	1.00924	1.04133	1.02501	1.03935	0.848487	0.86988	1.07262	0.9996	0.9993	0.68619	0.68674	1.1184	0.823164	1.04081	0.990644	1.00441	1.02768	1.02368	1.1587	1.00431	0.946107	1.0028	1.04248	1.0319	1.17939	1.34004	0.581758	0.939131	0.994913	0.776313	1.04415	1.01939	1.14077	1.12637	1.12042
461	chr2	30864416	31383531	0.992727	0.867188	0.92441	0.979709	0.981474	0.854277	1.07562	1.09669	1.10054	1.14316	1.50005	1.00924	1.04133	1.02501	1.03935	0.848487	0.86988	1.07262	0.9996	0.9993	0.68619	0.68674	1.1184	0.823164	1.04081	0.990644	1.00441	1.02768	1.02368	1.1587	1.00431	0.946107	1.0028	1.04248	1.0319	1.17939	1.34004	0.581758	0.939131	0.994913	0.776313	1.04415	1.01939	1.14077	1.12637	1.12042
462	chr2	31383532	31935767	0.992727	0.867188	0.92441	0.979709	0.981474	0.854277	1.07562	1.09669	1.10054	1.14316	1.50005	1.00924	1.04133	1.02501	1.03935	0.848487	0.86988	1.07262	0.9996	0.9993	0.68619	0.68674	1.1184	0.823164	1.04081	0.990644	1.00441	1.02768	1.02368	1.1587	1.00431	0.946107	1.0028	1.04248	1.0319	1.17939	1.34004	0.581758	0.939131	0.994913	0.776313	1.04415	1.01939	1.14077	1.12637	1.12042
463	chr2	31935768	32597270	0.992727	0.867188	0.92441	0.979709	0.981474	1.54018	1.07562	1.09669	1.10054	1.14316	1.50005	1.00924	1.04133	1.02501	1.03935	0.848487	0.86988	1.07262	0.9996	0.9993	0.68619	0.68674	1.1184	0.823164	1.04081	0.990644	1.00441	1.02768	1.02368	1.1587	1.00431	0.946107	1.0028	1.04248	1.0319	1.17939	1.34004	0.581758	0.939131	0.994913	0.776313	1.04415	1.01939	1.14077	1.12637	1.12042
464	chr2	32597271	33198565	0.992727	0.867188	0.92441	0.979709	0.981474	1.54018	1.07562	1.09669	1.10054	1.14316	1.50005	1.00924	1.04133	1.02501	1.03935	0.848487	0.86988	1.07262	0.9996	0.9993	0.68619	0.68674	1.1184	0.823164	1.04081	0.990644	1.00441	1.02768	1.02368	1.1587	1.00431	0.946107	1.0028	1.04248	1.0319	1.17939	1.34004	0.581758	0.939131	0.994913	0.776313	0.608779	1.01939	1.14077	1.12637	1.12042
465	chr2	33198566	33738047	0.992727	0.867188	0.92441	0.979709	0.981474	1.17046	1.07562	1.09669	1.10054	1.14316	1.50005	1.00924	1.04133	1.02501	1.03935	0.848487	0.86988	1.07262	0.9996	0.9993	0.68619	0.68674	1.1184	0.823164	1.04081	0.990644	1.00441	1.02768	1.02368	1.1587	1.00431	0.946107	1.0028	1.04248	1.0319	1.17939	1.34004	0.581758	0.939131	0.994913	0.776313	0.608779	1.01939	1.14077	1.12637	1.12042
466	chr2	33738048	34329598	0.992727	0.867188	0.92441	0.979709	0.981474	1.17046	1.07562	1.09669	1.10054	1.14316	1.50005	1.00924	1.04133	1.02501	1.03935	0.848487	0.86988	1.07262	0.9996	0.9993	0.68619	0.68674	1.1184	0.823164	1.04081	0.990644	1.00441	1.02768	1.02368	1.1587	1.00431	0.946107	1.0028	1.04248	1.0319	1.17939	1.34004	0.581758	0.939131	0.994913	0.776313	0.608779	1.01939	1.14077	1.12637	1.12042
467	chr2	34329599	34969115	0.992727	0.867188	0.92441	0.979709	0.981474	1.17046	1.07562	1.09669	1.10054	1.14316	1.50005	1.00924	1.04133	1.02501	1.03935	0.848487	0.86988	1.07262	0.9996	0.9993	0.68619	0.68674	1.1184	0.823164	1.04081	0.990644	1.00441	1.02768	1.02368	1.1587	1.00431	0.946107	1.0028	1.04248	1.0319	1.17939	1.34004	0.581758	0.939131	0.994913	0.776313	0.608779	1.01939	1.14077	1.12637	1.12042
468	chr2	34969116	35642877	0.992727	0.867188	0.92441	0.979709	0.981474	1.17046	1.07562	1.09669	1.10054	1.14316	1.50005	1.00924	1.04133	1.02501	1.03935	0.848487	0.86988	1.07262	0.9996	0.9993	0.68619	0.68674	1.1184	0.823164	1.04081	0.990644	1.00441	1.02768	1.02368	1.1587	1.00431	0.946107	1.0028	1.04248	1.0319	1.17939	1.34004	0.581758	0.939131	0.994913	0.776313	0.608779	1.01939	1.14077	1.12637	1.12042
469	chr2	35642878	36301261	0.992727	0.867188	0.92441	0.979709	0.981474	1.17046	1.07562	1.09669	1.10054	1.14316	1.50005	1.00924	1.04133	1.02501	1.03935	0.848487	0.86988	1.07262	0.9996	0.9993	0.68619	0.68674	1.1184	0.823164	1.04081	0.990644	1.00441	1.02768	1.02368	1.1587	1.00431	0.946107	1.0028	1.04248	1.0319	1.17939	1.34004	0.581758	0.939131	0.994913	0.776313	0.608779	1.01939	1.14077	1.12637	1.12042
470	chr2	36301262	36879041	0.992727	0.867188	0.92441	0.979709	0.981474	1.17046	1.07562	1.09669	1.10054	1.14316	1.50005	1.00924	1.04133	1.02501	1.03935	0.848487	0.86988	1.07262	0.9996	0.9993	0.68619	0.68674	1.1184	0.823164	1.04081	0.990644	1.00441	1.02768	1.02368	1.1587	1.00431	0.946107	1.0028	1.04248	1.0319	1.17939	1.34004	0.581758	0.939131	0.994913	0.776313	0.608779	1.01939	1.14077	1.12637	1.12042
471	chr2	36879042	37431136	0.992727	0.867188	0.92441	0.979709	0.981474	1.17046	1.07562	1.09669	1.10054	1.14316	1.50005	1.00924	1.04133	1.02501	1.03935	0.848487	0.86988	1.07262	0.9996	0.9993	0.68619	0.68674	1.1184	0.823164	1.04081	0.990644	1.00441	1.02768	1.02368	1.1587	1.00431	0.946107	1.0028	1.04248	1.0319	1.17939	1.34004	0.581758	0.939131	0.994913	0.776313	0.608779	1.01939	1.14077	1.12637	1.12042
472	chr2	37431137	37979780	0.992727	0.867188	0.92441	0.979709	0.981474	1.17046	1.07562	1.09669	1.10054	1.14316	1.50005	1.00924	1.04133	1.02501	1.03935	0.848487	0.86988	1.07262	0.9996	0.9993	0.68619	0.68674	1.1184	0.823164	1.04081	0.990644	1.00441	1.02768	1.02368	1.1587	1.00431	0.946107	1.0028	1.04248	1.0319	1.17939	1.34004	0.581758	0.939131	0.994913	0.776313	0.853252	1.01939	1.14077	1.12637	1.12042
473	chr2	37979781	38517812	0.992727	0.867188	0.92441	0.979709	0.981474	1.17046	1.07562	1.09669	1.10054	1.14316	1.50005	1.00924	1.04133	1.02501	1.03935	0.848487	0.86988	1.07262	0.9996	0.9993	0.68619	0.68674	1.1184	0.823164	1.04081	0.990644	1.00441	1.02768	1.02368	1.1587	1.00431	0.946107	1.0028	1.04248	1.0319	1.17939	1.34004	0.581758	0.939131	0.994913	0.776313	0.853252	1.01939	1.14077	0.788755	1.12042
474	chr2	38517813	39087244	0.992727	0.867188	0.92441	0.979709	0.981474	1.17046	1.07562	1.09669	1.10054	1.14316	1.50005	1.00924	1.04133	1.02501	1.03935	0.848487	0.86988	1.07262	0.9996	0.9993	0.68619	0.68674	1.1184	0.823164	1.04081	0.990644	1.00441	1.02768	1.02368	1.1587	1.13519	0.946107	1.0028	1.04248	1.0319	1.17939	1.34004	0.581758	0.939131	0.994913	0.776313	0.853252	1.01939	1.14077	0.788755	1.12042
475	chr2	39087245	39678823	0.992727	0.867188	0.92441	0.979709	0.981474	1.61494	1.07562	1.09669	1.10054	1.14316	1.50005	1.00924	1.04133	1.02501	1.03935	0.848487	0.86988	1.07262	0.9996	0.9993	0.68619	0.68674	1.1184	0.823164	1.04081	0.990644	1.00441	1.02768	1.02368	1.1587	1.13519	0.946107	1.0028	1.04248	1.0319	0.983931	1.34004	0.581758	0.939131	0.994913	0.776313	0.853252	1.01939	1.14077	0.788755	1.12042
476	chr2	39678824	40223561	0.992727	0.867188	0.92441	0.979709	0.981474	1.61494	1.07562	1.09669	1.10054	1.14316	1.50005	1.00924	1.04133	1.02501	1.03935	0.848487	0.86988	1.07262	0.9996	0.9993	0.793739	0.68674	1.1184	0.823164	1.04081	0.990644	1.00441	1.02768	1.02368	1.1587	1.13519	0.946107	1.0028	1.04248	1.0319	0.983931	1.34004	0.581758	0.939131	0.994913	0.776313	0.853252	1.01939	1.14077	0.788755	1.12042
477	chr2	40223562	40783523	0.992727	0.867188	0.92441	0.979709	0.981474	1.61494	1.07562	1.09669	1.10054	1.14316	1.50005	1.00924	1.04133	1.02501	1.03935	0.848487	0.86988	1.07262	0.9996	0.9993	0.793739	0.68674	1.1184	0.823164	1.04081	0.990644	1.00441	1.02768	1.02368	1.1587	1.13519	0.946107	1.0028	1.04248	1.0319	0.983931	1.34004	0.581758	0.939131	0.994913	0.776313	0.853252	1.01939	1.14077	0.788755	1.12042
478	chr2	40783524	41400376	0.992727	0.867188	0.92441	0.979709	0.981474	1.61494	1.07562	1.09669	1.10054	1.14316	1.50005	1.00924	1.04133	1.02501	1.03935	0.848487	0.86988	1.07262	0.9996	0.9993	0.793739	0.68674	1.1184	0.823164	1.04081	0.990644	1.00441	1.02768	1.02368	1.1587	1.13519	0.946107	1.0028	1.04248	1.0319	0.983931	1.34004	0.581758	0.939131	0.994913	0.776313	0.853252	1.01939	1.14077	0.788755	1.12042
479	chr2	41400377	42006964	0.992727	0.867188	0.92441	0.979709	0.981474	1.61494	1.07562	1.09669	1.10054	1.14316	1.50005	1.00924	1.04133	1.02501	1.03935	0.848487	0.86988	1.07262	0.9996	0.9993	0.793739	0.68674	1.1184	0.823164	1.04081	0.990644	1.00441	1.02768	1.02368	1.1587	1.13519	0.946107	1.0028	1.04248	1.0319	0.983931	1.34004	0.581758	0.939131	0.994913	0.776313	0.853252	1.01939	1.14077	1.13066	1.12042
480	chr2	42006965	42563140	0.992727	0.867188	0.92441	0.979709	0.981474	1.61494	1.07562	1.09669	1.10054	1.14316	1.50005	1.00924	1.04133	1.02501	1.03935	0.848487	0.86988	1.07262	0.9996	0.9993	0.793739	0.68674	1.1184	0.823164	1.04081	0.990644	1.00441	1.02768	1.02368	1.1587	1.13519	0.946107	1.0028	1.04248	1.0319	0.983931	1.34004	0.581758	0.939131	0.994913	0.776313	0.853252	1.01939	1.14077	1.13066	1.12042
481	chr2	42563141	43142304	0.992727	0.867188	0.92441	0.979709	0.981474	1.61494	1.07562	1.09669	1.10054	1.14316	1.50005	1.00924	1.04133	1.02501	1.03935	0.848487	0.86988	1.07262	0.9996	0.9993	0.793739	0.68674	1.1184	0.823164	1.04081	0.990644	1.00441	1.02768	1.02368	1.1587	1.13519	0.946107	1.0028	1.04248	1.0319	0.983931	1.34004	0.581758	0.939131	0.994913	0.776313	0.853252	1.01939	1.14077	1.13066	1.12042
482	chr2	43142305	43662661	0.992727	0.867188	0.92441	0.979709	0.981474	1.61494	1.07562	1.09669	1.10054	1.14316	1.50005	1.00924	1.04133	1.02501	1.03935	0.848487	0.86988	1.07262	0.9996	0.9993	0.793739	0.68674	1.1184	0.823164	1.04081	0.990644	1.00441	1.02768	1.02368	1.1587	1.13519	0.946107	1.0028	1.04248	1.0319	0.983931	1.34004	0.581758	0.939131	0.994913	0.776313	0.853252	1.01939	1.14077	1.13066	1.12042
483	chr2	43662662	44246905	0.992727	0.867188	0.92441	0.979709	0.981474	1.61494	1.07562	1.09669	1.10054	1.14316	1.50005	1.00924	1.04133	1.02501	1.03935	0.848487	0.86988	1.07262	0.9996	0.9993	0.793739	0.68674	1.1184	0.823164	1.04081	0.990644	1.00441	1.02768	1.02368	1.1587	1.13519	0.946107	1.0028	1.04248	1.0319	0.983931	1.34004	0.581758	0.939131	0.994913	0.776313	0.853252	1.01939	1.14077	1.13066	1.12042
484	chr2	44246906	44840512	0.992727	0.867188	0.92441	0.979709	0.981474	1.61494	1.07562	1.09669	1.10054	1.14316	1.50005	1.00924	1.04133	1.02501	1.03935	0.848487	0.86988	1.07262	0.9996	0.9993	0.916036	0.68674	1.1184	0.823164	1.04081	0.990644	1.00441	1.02768	1.02368	1.1587	1.13519	0.946107	1.0028	1.04248	1.0319	0.983931	1.34004	0.581758	0.939131	0.994913	0.776313	0.853252	1.01939	1.14077	1.13066	1.12042
485	chr2	44840513	45394967	0.992727	0.867188	0.92441	0.979709	0.981474	1.61494	1.07562	1.09669	1.10054	1.14316	1.50005	1.00924	1.04133	1.02501	1.03935	0.848487	0.86988	1.07262	0.9996	0.9993	0.916036	0.68674	1.1184	0.823164	1.04081	0.990644	1.00441	1.02768	1.02368	1.1587	1.13519	0.946107	1.0028	1.04248	1.0319	0.983931	1.34004	0.581758	0.939131	0.994913	1.14191	0.853252	1.01939	1.14077	1.13066	1.12042
486	chr2	45394968	45955197	0.992727	0.867188	0.92441	0.979709	0.981474	1.61494	1.07562	1.09669	1.10054	1.14316	1.50005	1.00924	1.04133	1.02501	1.03935	0.848487	0.86988	1.07262	0.9996	0.9993	0.916036	0.68674	1.1184	0.823164	1.04081	0.990644	1.00441	1.02768	1.02368	1.1587	1.13519	0.946107	1.0028	1.04248	1.0319	0.983931	1.34004	0.581758	0.939131	0.994913	1.14191	0.853252	1.01939	1.14077	1.13066	1.12042
487	chr2	45955198	46454667	0.992727	0.867188	0.92441	0.979709	0.981474	1.61494	1.07562	1.09669	1.10054	1.14316	1.50005	1.00924	1.04133	1.02501	1.03935	0.848487	0.86988	1.07262	0.9996	0.9993	0.916036	0.68674	1.1184	0.823164	1.04081	0.990644	1.00441	1.02768	1.02368	1.1587	1.13519	0.946107	1.0028	1.04248	1.0319	0.983931	1.34004	0.581758	0.939131	0.994913	1.14191	0.853252	1.01939	1.14077	1.13066	1.12042
488	chr2	46454668	46973302	0.992727	0.867188	0.92441	0.979709	0.981474	1.61494	1.07562	1.09669	1.10054	1.14316	1.50005	1.00924	1.04133	1.02501	1.03935	0.848487	0.86988	1.07262	0.9996	0.9993	0.916036	0.68674	1.1184	0.823164	1.04081	0.990644	1.00441	1.02768	1.02368	1.1587	1.13519	0.946107	1.0028	1.04248	1.0319	0.983931	1.34004	0.581758	0.939131	0.994913	1.14191	0.853252	1.01939	1.14077	1.13066	1.12042
489	chr2	46973303	47483487	0.992727	0.867188	0.92441	0.979709	0.981474	1.61494	1.07562	1.09669	1.10054	1.14316	1.50005	1.00924	1.04133	1.02501	1.03935	0.848487	0.86988	1.07262	0.9996	0.9993	0.916036	0.68674	1.1184	0.823164	1.04081	0.990644	1.00441	1.02768	1.02368	1.1587	1.13519	0.946107	1.0028	1.04248	1.0319	0.983931	1.34004	0.581758	0.939131	0.994913	1.14191	0.853252	1.01939	1.14077	1.13066	1.12042
490	chr2	47483488	48046218	0.992727	0.867188	0.92441	0.979709	0.981474	1.61494	1.07562	1.09669	1.10054	1.14316	1.50005	1.00924	1.04133	1.02501	1.03935	0.848487	0.86988	1.07262	0.9996	0.9993	0.916036	0.68674	1.1184	0.823164	1.04081	0.990644	1.00441	1.02768	1.02368	1.1587	1.13519	0.946107	1.0028	1.04248	1.0319	0.983931	1.34004	0.581758	0.939131	0.994913	1.14191	0.853252	1.01939	1.14077	1.13066	1.12042
491	chr2	48046219	48650808	0.992727	0.867188	1.02901	0.979709	0.981474	1.61494	1.07562	1.09669	1.10054	1.14316	1.50005	1.00924	1.04133	1.02501	1.03935	0.848487	0.86988	1.07262	0.9996	0.9993	0.916036	0.68674	1.1184	0.823164	1.04081	0.990644	1.00441	1.02768	1.02368	1.1587	1.13519	0.946107	1.0028	1.04248	1.0319	0.983931	1.34004	0.581758	0.939131	0.994913	1.14191	0.853252	1.01939	1.14077	1.13066	1.12042
492	chr2	48650809	49243614	0.992727	0.867188	1.02901	0.979709	0.981474	1.61494	1.07562	1.09669	1.10054	1.14316	1.50005	1.00924	1.04133	1.02501	1.03935	0.848487	0.86988	1.07262	0.9996	0.9993	0.916036	0.68674	1.1184	0.823164	1.04081	0.990644	1.00441	1.02768	1.02368	1.1587	1.13519	0.946107	1.0028	1.04248	1.0319	0.983931	1.34004	0.581758	0.939131	0.994913	1.14191	0.853252	1.01939	1.14077	1.13066	1.12042
493	chr2	49243615	49876102	0.992727	0.867188	1.02901	0.979709	0.981474	1.61494	1.07562	1.09669	1.10054	1.14316	1.50005	1.00924	1.04133	1.02501	1.03935	0.947337	0.86988	1.07262	0.9996	0.9993	0.916036	0.68674	1.1184	0.823164	1.04081	0.990644	1.00441	1.02768	1.02368	1.28582	1.13519	0.946107	1.0028	1.04248	1.0319	0.983931	1.34004	0.581758	0.939131	0.994913	1.14191	0.853252	1.01939	1.14077	1.13066	1.12042
494	chr2	49876103	50503028	0.992727	0.867188	1.02901	0.979709	0.981474	1.61494	1.07562	1.09669	1.10054	1.14316	1.50005	1.00924	1.04133	1.02501	1.03935	0.947337	0.86988	1.07262	0.9996	0.9993	0.916036	0.68674	1.1184	0.823164	1.04081	0.990644	1.00441	1.02768	1.02368	1.28582	1.13519	0.946107	1.0028	1.04248	1.0319	0.983931	1.34004	0.581758	0.939131	0.994913	1.14191	0.853252	1.01939	1.14077	1.13066	1.12042
495	chr2	50503029	51097943	0.992727	0.867188	1.02901	0.979709	0.981474	1.61494	1.07562	1.09669	1.10054	1.14316	1.50005	1.00924	1.04133	1.02501	1.03935	0.947337	0.86988	1.07262	0.9996	0.9993	0.916036	0.68674	1.1184	0.823164	1.04081	0.990644	1.00441	1.02768	1.02368	1.28582	1.13519	0.946107	1.0028	1.04248	1.0319	0.983931	1.34004	0.581758	0.939131	0.994913	1.14191	0.853252	1.01939	1.14077	1.13066	1.12042
496	chr2	51097944	51727810	0.992727	0.867188	1.02901	0.979709	0.981474	1.61494	1.07562	1.09669	1.10054	1.14316	1.50005	1.00924	1.04133	1.02501	1.03935	0.947337	0.86988	1.07262	0.9996	0.9993	0.916036	0.68674	1.1184	0.823164	1.04081	0.990644	1.00441	1.02768	1.02368	1.28582	1.13519	0.946107	1.0028	1.04248	1.0319	0.983931	1.34004	0.581758	0.939131	0.994913	1.14191	0.853252	1.01939	1.14077	1.13066	1.12042
497	chr2	51727811	52410958	0.992727	0.867188	1.02901	0.979709	0.981474	1.61494	1.07562	1.09669	1.10054	1.14316	1.50005	1.00924	1.04133	1.02501	1.03935	0.947337	0.631915	1.07262	0.9996	0.9993	0.916036	0.68674	1.1184	0.823164	1.04081	0.990644	1.00441	1.02768	1.02368	1.28582	1.13519	0.946107	1.0028	1.04248	1.0319	0.983931	1.34004	0.581758	0.939131	0.994913	1.14191	0.853252	1.01939	1.14077	1.13066	1.12042
498	chr2	52410959	53047196	0.992727	0.867188	1.02901	0.979709	0.981474	1.61494	1.07562	1.09669	1.10054	1.14316	1.50005	1.00924	1.04133	1.02501	1.03935	0.947337	0.631915	1.07262	0.9996	0.9993	0.916036	0.68674	1.1184	0.823164	1.04081	0.990644	1.00441	1.02768	1.02368	1.28582	1.13519	0.946107	1.0028	1.04248	1.0319	0.983931	1.34004	0.581758	0.939131	0.994913	1.14191	0.853252	1.01939	1.14077	1.13066	1.12042
499	chr2	53047197	53670221	0.992727	0.867188	1.02901	0.979709	0.981474	1.61494	1.07562	1.09669	1.10054	1.14316	1.50005	1.00924	1.04133	1.02501	1.03935	0.947337	0.631915	1.07262	0.9996	0.9993	0.916036	0.68674	1.1184	0.823164	1.04081	0.990644	1.00441	1.02768	1.02368	1.28582	1.13519	0.946107	1.0028	1.04248	1.0319	0.983931	1.34004	0.581758	0.939131	0.994913	1.14191	0.853252	1.01939	1.14077	1.13066	1.12042
500	chr2	53670222	54257737	0.992727	0.867188	1.02901	0.979709	0.981474	1.61494	1.07562	1.09669	1.10054	1.14316	1.50005	1.00924	1.04133	1.02501	1.03935	0.947337	0.631915	1.07262	0.9996	0.9993	0.916036	0.68674	1.1184	0.823164	1.04081	0.990644	1.00441	1.02768	1.02368	1.28582	1.13519	0.946107	1.0028	1.04248	1.0319	0.983931	1.34004	0.581758	0.939131	0.994913	1.14191	0.853252	1.01939	1.14077	1.13066	1.12042
501	chr2	54257738	54820139	0.992727	0.867188	1.02901	0.979709	0.981474	1.61494	1.07562	1.09669	1.10054	1.14316	1.50005	1.00924	1.04133	1.02501	1.03935	0.947337	0.631915	1.07262	0.9996	0.9993	0.916036	0.68674	1.1184	0.823164	1.04081	0.990644	1.00441	1.02768	1.02368	1.28582	1.13519	0.946107	1.0028	1.04248	1.0319	0.983931	1.34004	0.581758	0.939131	0.994913	1.14191	0.853252	1.01939	1.14077	1.13066	1.12042
502	chr2	54820140	55348994	0.992727	0.867188	1.02901	0.979709	0.981474	1.61494	1.07562	1.09669	1.10054	1.14316	1.50005	1.00924	1.04133	1.02501	1.03935	0.947337	0.631915	1.07262	0.9996	0.9993	0.916036	0.68674	1.1184	0.823164	1.04081	0.990644	1.00441	1.02768	1.02368	1.28582	1.13519	0.946107	1.0028	1.04248	1.0319	0.983931	1.34004	0.581758	0.939131	0.994913	1.14191	0.853252	1.01939	1.14077	1.13066	1.12042
503	chr2	55348995	55949084	0.992727	0.867188	1.02901	0.979709	0.981474	1.61494	1.07562	1.09669	1.10054	1.14316	1.50005	1.00924	1.04133	1.02501	1.03935	0.947337	0.631915	1.19698	0.9996	0.9993	0.916036	0.68674	1.1184	0.823164	1.04081	0.990644	1.00441	1.02768	1.02368	1.28582	1.13519	0.946107	1.0028	1.04248	1.0319	0.983931	1.34004	0.581758	0.939131	0.994913	1.14191	0.853252	1.01939	1.14077	1.13066	1.12042
504	chr2	55949085	56527410	0.992727	0.867188	1.02901	0.979709	0.981474	1.61494	1.07562	1.09669	1.10054	1.14316	1.50005	1.00924	1.04133	1.02501	1.03935	0.947337	0.631915	1.19698	0.9996	0.9993	0.916036	0.68674	1.1184	0.823164	1.04081	0.990644	1.00441	1.02768	1.02368	1.28582	1.13519	0.946107	1.0028	1.04248	1.0319	0.983931	1.34004	0.581758	0.939131	0.994913	1.14191	0.853252	1.01939	1.14077	1.13066	1.12042
505	chr2	56527411	57144947	0.992727	0.867188	1.02901	0.979709	0.981474	1.61494	1.07562	1.09669	1.10054	1.14316	1.50005	1.00924	1.04133	1.02501	1.03935	0.947337	0.631915	1.19698	0.9996	0.9993	0.916036	0.68674	1.1184	0.823164	1.04081	0.990644	1.00441	1.02768	1.02368	1.28582	1.13519	0.946107	1.0028	1.04248	1.0319	0.983931	1.34004	0.581758	0.939131	0.994913	1.14191	0.853252	1.01939	1.14077	1.13066	1.12042
506	chr2	57144948	57821570	0.992727	0.867188	1.02901	0.979709	0.981474	1.61494	1.07562	1.09669	1.10054	1.14316	1.50005	1.00924	1.04133	1.02501	1.03935	0.947337	0.631915	1.19698	0.9996	0.9993	0.916036	0.68674	1.1184	0.823164	1.04081	0.990644	1.00441	1.02768	1.02368	1.28582	1.13519	0.946107	1.0028	1.04248	1.0319	0.983931	1.34004	0.581758	0.939131	0.994913	1.14191	0.853252	1.01939	1.14077	1.13066	1.12042
507	chr2	57821571	58467234	0.992727	0.867188	1.02901	0.979709	0.981474	1.61494	1.07562	1.09669	1.10054	1.14316	1.50005	1.00924	1.04133	1.02501	1.03935	0.947337	0.631915	1.19698	0.9996	0.9993	0.916036	0.68674	1.1184	0.823164	1.04081	0.990644	1.00441	1.02768	1.02368	1.28582	1.13519	0.946107	1.0028	1.04248	1.0319	0.983931	1.34004	0.581758	0.939131	0.994913	1.14191	0.853252	1.01939	1.14077	1.13066	1.12042
508	chr2	58467235	59063278	0.992727	0.867188	1.02901	0.979709	0.981474	1.61494	1.07562	1.09669	1.10054	1.14316	1.50005	1.00924	1.04133	1.02501	1.03935	0.947337	0.631915	1.19698	0.9996	0.9993	0.916036	0.68674	1.1184	0.823164	1.04081	0.990644	1.00441	1.02768	1.02368	1.28582	1.13519	0.946107	1.0028	1.04248	1.0319	0.983931	1.34004	0.581758	0.939131	0.994913	1.14191	0.853252	1.01939	1.14077	1.13066	1.12042
509	chr2	59063279	59627318	0.992727	0.867188	1.02901	0.979709	0.981474	1.61494	1.07562	1.09669	1.10054	1.14316	1.50005	1.00924	1.04133	1.02501	1.03935	0.947337	0.631915	1.19698	0.9996	0.9993	0.916036	0.68674	1.1184	0.823164	1.04081	0.990644	1.00441	1.02768	1.02368	1.28582	1.13519	0.946107	1.0028	1.04248	1.0319	0.983931	1.34004	0.581758	0.939131	0.994913	1.14191	0.853252	1.01939	1.14077	1.13066	1.12042
510	chr2	59627319	60229212	0.992727	0.867188	1.02901	0.979709	0.981474	1.61494	1.07562	1.09669	1.10054	1.14316	1.50005	1.00924	1.04133	1.02501	1.03935	0.947337	0.631915	1.19698	0.9996	0.9993	0.916036	0.68674	1.1184	0.823164	1.04081	0.990644	1.00441	1.02768	1.02368	1.28582	1.13519	0.946107	1.0028	1.04248	1.0319	0.983931	1.34004	0.581758	0.939131	0.994913	1.14191	0.853252	1.01939	1.14077	1.13066	1.12042
511	chr2	60229213	60766385	0.992727	0.867188	1.02901	0.979709	0.981474	1.61494	1.07562	1.09669	1.10054	1.14316	1.50005	1.00924	1.04133	1.02501	1.03935	0.947337	0.631915	1.19698	0.9996	0.9993	0.916036	0.68674	1.1184	0.823164	1.04081	0.990644	1.00441	1.02768	1.02368	1.28582	1.13519	0.946107	1.0028	1.04248	1.0319	1.12412	1.34004	0.581758	0.939131	0.994913	1.14191	0.853252	1.01939	1.14077	1.13066	1.12042
512	chr2	60766386	61358979	0.992727	0.867188	1.02901	0.979709	0.981474	1.61494	1.07562	1.09669	1.10054	1.14316	1.50005	1.00924	1.04133	1.02501	1.03935	0.947337	0.631915	1.19698	0.9996	0.9993	0.916036	0.68674	1.1184	0.823164	1.04081	0.990644	1.00441	1.02768	1.02368	1.28582	1.13519	0.946107	1.0028	1.04248	1.0319	1.12412	1.34004	0.581758	0.939131	0.994913	1.14191	0.853252	1.01939	1.14077	1.13066	1.12042
513	chr2	61358980	61947434	0.992727	0.867188	1.02901	0.979709	0.981474	1.61494	1.07562	1.09669	1.10054	1.14316	1.50005	1.00924	1.04133	1.02501	1.03935	0.947337	0.631915	1.19698	0.9996	0.9993	0.916036	0.68674	1.1184	0.823164	1.04081	0.990644	1.00441	1.02768	1.02368	1.28582	1.13519	0.946107	1.0028	1.04248	1.0319	1.12412	1.34004	0.581758	0.939131	0.994913	1.14191	0.853252	1.01939	1.14077	1.13066	1.12042
514	chr2	61947435	62515784	0.992727	0.867188	1.02901	0.979709	0.981474	1.61494	1.07562	1.09669	1.10054	1.14316	1.50005	1.00924	1.04133	1.02501	1.03935	0.947337	0.631915	1.19698	0.9996	0.9993	0.916036	0.68674	1.1184	0.823164	1.04081	0.990644	1.00441	1.02768	1.02368	1.28582	1.13519	0.946107	1.0028	1.04248	1.0319	1.12412	1.34004	0.581758	0.939131	0.994913	1.14191	0.853252	1.01939	1.14077	1.13066	1.12042
515	chr2	62515785	63091836	0.992727	0.867188	1.02901	0.979709	0.981474	1.61494	1.07562	1.09669	1.10054	1.14316	1.50005	1.00924	1.04133	1.02501	1.03935	0.947337	0.631915	1.19698	0.9996	0.9993	0.916036	0.68674	1.1184	0.823164	1.04081	0.990644	1.00441	1.02768	1.02368	1.28582	1.13519	0.946107	1.0028	1.04248	1.0319	1.12412	1.34004	0.581758	0.939131	0.994913	1.14191	1.07423	1.01939	1.14077	1.13066	1.12042
516	chr2	63091837	63702132	0.992727	0.867188	1.02901	0.979709	0.981474	1.61494	1.07562	1.09669	1.10054	1.14316	1.50005	1.00924	1.04133	1.02501	1.03935	0.947337	0.631915	1.19698	0.9996	0.9993	0.916036	0.68674	1.1184	0.823164	1.04081	0.990644	1.00441	1.02768	1.02368	1.28582	1.13519	0.946107	1.0028	1.04248	1.0319	1.12412	1.34004	0.581758	0.939131	0.994913	1.14191	1.07423	1.01939	1.14077	1.13066	1.12042
517	chr2	63702133	64314285	0.992727	0.867188	1.02901	0.979709	0.981474	1.61494	1.07562	1.09669	1.10054	1.14316	1.50005	1.00924	1.04133	1.02501	1.03935	0.947337	0.631915	1.19698	0.9996	0.9993	0.916036	0.68674	1.1184	0.823164	1.04081	0.990644	1.00441	1.02768	1.02368	1.28582	1.13519	0.946107	1.0028	1.04248	1.0319	1.12412	1.34004	0.581758	0.939131	0.994913	1.14191	1.07423	1.01939	1.14077	0.759192	1.12042
518	chr2	64314286	64864049	0.992727	0.867188	1.02901	0.979709	0.981474	1.61494	1.07562	1.09669	1.10054	1.14316	1.50005	1.00924	1.04133	1.02501	1.03935	0.947337	1.08285	1.19698	0.9996	0.9993	0.916036	0.68674	1.1184	0.823164	1.04081	0.990644	1.00441	1.02768	1.02368	1.28582	1.13519	0.946107	1.0028	1.27481	1.0319	1.12412	1.34004	0.829859	0.939131	0.994913	1.14191	1.07423	1.01939	1.14077	0.759192	1.12042
519	chr2	64864050	65392921	0.992727	0.867188	1.02901	0.979709	0.981474	1.61494	1.07562	1.09669	1.10054	1.14316	1.50005	1.00924	1.04133	1.02501	1.03935	0.947337	1.08285	1.19698	0.9996	0.9993	0.916036	0.68674	1.1184	0.823164	1.04081	0.990644	1.00441	1.02768	1.02368	1.28582	1.13519	0.946107	1.0028	1.27481	1.0319	1.12412	1.34004	0.829859	0.939131	0.994913	1.14191	1.07423	1.01939	1.14077	0.759192	1.12042
520	chr2	65392922	65965272	0.992727	0.867188	1.02901	0.979709	0.981474	1.61494	1.07562	1.09669	1.10054	0.985999	1.50005	1.00924	1.04133	1.02501	1.03935	0.947337	1.08285	1.19698	0.9996	0.9993	0.916036	0.68674	1.1184	0.823164	1.04081	0.990644	1.00441	1.02768	1.02368	1.28582	1.13519	0.946107	1.0028	1.27481	1.0319	1.12412	1.34004	0.829859	0.939131	0.994913	1.14191	1.07423	1.01939	1.14077	0.759192	1.12042
521	chr2	65965273	66529727	0.992727	0.867188	1.02901	0.979709	0.981474	1.15581	1.07562	1.09669	1.10054	0.985999	1.50005	1.00924	1.04133	1.02501	1.03935	0.947337	1.08285	1.19698	0.9996	0.9993	0.916036	0.68674	1.1184	0.823164	1.04081	0.990644	1.00441	1.02768	1.02368	1.28582	1.13519	0.946107	1.0028	1.27481	1.0319	1.12412	1.34004	0.829859	0.939131	0.994913	1.14191	1.07423	1.01939	1.14077	0.759192	1.12042
522	chr2	66529728	67114299	0.992727	0.867188	1.02901	0.979709	0.981474	1.15581	1.07562	1.09669	1.10054	0.985999	1.50005	1.00924	1.04133	1.02501	1.03935	0.947337	1.08285	1.19698	0.9996	0.9993	0.916036	0.68674	1.1184	0.823164	1.04081	0.990644	1.00441	1.02768	1.02368	1.28582	1.13519	0.946107	1.0028	1.27481	1.0319	0.939413	1.34004	0.829859	0.939131	0.994913	1.14191	1.07423	1.01939	1.14077	0.759192	1.12042
523	chr2	67114300	67686289	0.992727	0.867188	1.02901	0.979709	0.981474	1.15581	1.07562	1.09669	1.10054	0.985999	1.20105	1.00924	1.04133	1.02501	1.03935	0.947337	1.08285	1.19698	0.9996	0.9993	0.916036	0.68674	1.1184	0.823164	1.04081	0.990644	1.00441	1.02768	1.02368	1.28582	0.928115	0.946107	1.0028	1.27481	1.0319	0.939413	1.34004	0.829859	0.939131	0.994913	1.14191	1.07423	1.01939	1.14077	0.759192	1.12042
524	chr2	67686290	68214069	0.992727	0.867188	1.02901	0.979709	0.981474	1.15581	1.07562	1.09669	1.10054	0.985999	1.20105	1.00924	1.04133	1.02501	1.03935	0.947337	1.08285	1.19698	0.9996	0.9993	0.916036	1.01157	1.1184	0.823164	1.04081	0.990644	1.00441	1.02768	1.02368	1.28582	0.928115	0.946107	1.0028	1.07983	1.0319	0.939413	1.34004	0.829859	0.939131	0.994913	1.14191	1.07423	1.01939	1.14077	1.03738	1.12042
525	chr2	68214070	68818686	0.992727	0.867188	1.02901	0.979709	0.981474	1.15581	1.07562	1.09669	1.10054	0.985999	1.20105	1.00924	1.04133	1.02501	1.03935	0.947337	1.08285	1.19698	0.9996	0.9993	0.824647	1.01157	1.1184	0.823164	1.04081	0.990644	1.00441	1.02768	1.02368	1.28582	0.928115	0.946107	1.0028	1.07983	1.0319	0.939413	1.34004	0.829859	0.939131	0.994913	1.14191	1.07423	1.01939	1.14077	1.03738	1.12042
526	chr2	68818687	69360164	0.992727	0.867188	1.02901	0.979709	0.981474	1.15581	1.07562	1.09669	1.10054	0.985999	1.20105	1.00924	1.04133	1.02501	1.03935	0.947337	1.08285	1.19698	0.9996	0.9993	0.824647	1.01157	1.1184	0.823164	1.04081	0.990644	1.00441	1.02768	1.02368	1.28582	0.928115	0.946107	1.0028	1.07983	1.0319	0.939413	1.34004	0.829859	0.939131	0.994913	1.14191	1.07423	1.01939	1.14077	1.03738	1.12042
527	chr2	69360165	69874210	0.992727	0.867188	1.02901	0.979709	0.981474	1.15581	1.07562	1.09669	1.10054	0.985999	1.20105	1.00924	1.04133	1.02501	1.03935	0.947337	1.08285	1.19698	0.9996	0.9993	0.824647	1.01157	1.1184	0.823164	1.04081	0.990644	1.00441	1.02768	1.02368	1.28582	0.928115	0.946107	1.0028	1.07983	1.0319	0.939413	1.34004	0.829859	0.939131	0.994913	1.14191	1.07423	1.01939	1.14077	1.03738	1.12042
528	chr2	69874211	70410720	0.992727	0.867188	1.02901	0.979709	0.981474	1.15581	1.07562	1.09669	1.10054	0.985999	1.20105	1.00924	1.04133	1.02501	1.03935	0.947337	1.08285	1.19698	0.9996	0.9993	0.824647	1.01157	1.1184	0.823164	1.04081	0.990644	1.00441	1.02768	1.02368	0.963098	0.928115	0.946107	1.0028	1.07983	1.0319	0.939413	1.34004	0.829859	0.939131	0.994913	1.14191	1.07423	1.01939	1.14077	1.03738	1.12042
529	chr2	70410721	70934072	0.992727	0.867188	1.02901	0.979709	0.981474	1.15581	1.07562	1.09669	1.10054	0.985999	1.20105	1.00924	1.04133	1.02501	1.03935	0.947337	1.08285	1.19698	0.9996	0.9993	0.824647	1.01157	1.1184	0.823164	1.04081	0.990644	1.00441	1.02768	1.02368	0.963098	0.928115	0.946107	1.0028	1.07983	1.0319	0.939413	1.34004	0.829859	0.939131	0.994913	1.14191	1.07423	1.01939	1.14077	1.03738	1.12042
530	chr2	70934073	71469366	0.992727	0.867188	1.02901	0.979709	0.981474	1.15581	1.07562	1.09669	1.10054	0.985999	1.20105	1.00924	1.04133	1.02501	1.03935	0.947337	1.08285	1.19698	0.9996	0.9993	0.824647	1.01157	1.1184	0.823164	1.04081	0.990644	1.00441	1.02768	1.02368	0.963098	0.928115	0.946107	1.0028	1.07983	1.0319	0.939413	1.34004	0.829859	0.939131	0.994913	1.14191	1.07423	1.01939	1.14077	1.03738	1.12042
531	chr2	71469367	72010329	0.992727	0.867188	1.02901	0.979709	0.981474	1.15581	1.07562	1.09669	1.10054	0.985999	1.20105	1.00924	1.04133	1.02501	1.03935	0.947337	1.08285	1.19698	0.9996	0.9993	0.824647	1.01157	1.1184	0.823164	1.04081	0.990644	1.00441	1.02768	1.02368	0.963098	0.928115	0.946107	1.0028	1.07983	1.0319	0.939413	1.34004	0.829859	0.939131	0.994913	1.14191	1.07423	1.01939	1.14077	1.03738	1.12042
532	chr2	72010330	72551593	0.992727	0.867188	1.02901	0.979709	0.981474	1.15581	1.07562	1.09669	1.10054	0.985999	1.20105	1.00924	1.04133	1.02501	1.03935	0.947337	1.08285	1.19698	0.9996	0.9993	0.824647	1.01157	1.1184	0.823164	1.04081	0.990644	1.00441	1.02768	1.02368	0.963098	0.928115	0.946107	1.0028	1.07983	1.0319	0.939413	1.34004	0.829859	0.939131	0.994913	1.14191	1.07423	1.01939	1.14077	1.03738	1.12042
533	chr2	72551594	73132611	0.992727	0.867188	1.02901	0.979709	0.981474	1.15581	1.07562	1.09669	1.10054	0.985999	1.20105	1.00924	1.04133	1.02501	1.03935	0.947337	1.08285	1.19698	0.9996	0.9993	0.824647	1.01157	1.1184	0.823164	1.04081	0.990644	1.00441	1.02768	1.02368	0.963098	0.928115	0.946107	1.0028	1.07983	1.0319	0.939413	1.34004	0.829859	0.939131	0.994913	1.14191	1.07423	1.01939	1.14077	1.03738	1.12042
534	chr2	73132612	73679991	0.992727	0.867188	1.02901	0.979709	0.981474	1.15581	1.07562	1.09669	1.10054	0.985999	1.20105	1.00924	0.6472	1.02501	1.03935	0.947337	1.08285	1.19698	0.9996	0.9993	0.824647	1.01157	1.1184	0.823164	1.04081	0.990644	1.00441	1.02768	1.02368	0.963098	0.928115	0.946107	1.0028	1.07983	1.0319	0.939413	1.34004	0.829859	0.939131	0.994913	1.14191	1.07423	1.01939	1.14077	1.03738	1.12042
535	chr2	73679992	74208964	0.992727	0.867188	1.02901	0.979709	0.981474	1.15581	1.07562	1.09669	1.10054	0.985999	1.20105	1.00924	0.6472	1.02501	1.03935	0.947337	1.08285	1.19698	0.9996	0.9993	0.824647	1.01157	1.1184	0.823164	1.04081	0.990644	1.00441	1.02768	1.02368	1.20274	0.928115	0.946107	1.0028	1.07983	1.0319	0.939413	1.34004	0.829859	0.939131	0.994913	1.14191	1.07423	1.01939	1.14077	1.03738	1.12042
536	chr2	74208965	74746513	0.992727	0.867188	1.02901	0.979709	0.981474	1.15581	1.07562	1.09669	1.10054	0.985999	1.20105	1.00924	0.6472	1.02501	1.03935	0.947337	1.08285	1.19698	0.9996	0.9993	0.824647	1.01157	1.1184	0.823164	1.04081	0.990644	1.00441	1.02768	1.02368	1.20274	0.928115	0.946107	1.0028	1.07983	1.0319	0.939413	1.34004	0.829859	0.939131	0.994913	1.14191	1.07423	1.01939	1.14077	1.03738	1.12042
537	chr2	74746514	75276448	0.992727	0.867188	1.02901	0.979709	0.981474	1.60593	1.07562	1.09669	1.10054	0.985999	1.20105	1.00924	1.0023	1.02501	1.03935	0.947337	1.08285	1.19698	0.9996	0.9993	0.824647	1.01157	1.1184	0.823164	1.04081	0.990644	1.00441	1.02768	1.02368	1.20274	0.928115	0.946107	1.0028	1.07983	1.0319	0.939413	1.34004	0.829859	0.939131	0.994913	1.14191	1.07423	1.01939	1.14077	1.03738	1.12042
538	chr2	75276449	75824085	0.992727	0.867188	1.02901	0.979709	0.981474	1.60593	1.07562	1.09669	1.10054	1.14168	1.20105	1.00924	1.0023	1.02501	1.03935	0.947337	1.46272	1.19698	0.9996	0.9993	0.824647	1.01157	1.1184	0.823164	1.04081	0.990644	1.00441	1.02768	1.02368	1.20274	1.08687	0.946107	1.0028	1.07983	1.0319	0.939413	1.34004	0.829859	0.939131	0.994913	1.14191	1.07423	1.01939	1.14077	1.03738	1.12042
539	chr2	75824086	76420690	0.992727	0.867188	1.02901	0.979709	0.981474	1.60593	1.07562	1.09669	1.10054	1.14168	1.20105	1.00924	1.0023	1.02501	1.03935	0.947337	1.46272	1.19698	0.9996	0.9993	0.824647	1.01157	1.1184	0.823164	1.04081	0.990644	1.00441	1.02768	1.02368	1.44398	1.08687	0.946107	1.0028	1.07983	1.0319	0.939413	1.34004	0.829859	0.939131	0.994913	1.14191	1.07423	1.15963	1.14077	1.03738	1.12042
540	chr2	76420691	77054426	0.992727	0.867188	1.02901	0.979709	0.981474	1.60593	1.07562	1.09669	1.10054	1.14168	1.20105	1.00924	1.0023	1.02501	1.03935	0.947337	1.46272	1.19698	0.9996	0.9993	0.824647	1.01157	1.1184	0.823164	1.04081	0.990644	1.00441	1.02768	1.02368	1.44398	1.08687	0.946107	1.0028	1.07983	1.0319	0.939413	1.34004	0.829859	0.939131	0.994913	1.14191	1.07423	1.15963	1.14077	1.03738	1.12042
541	chr2	77054427	77721735	0.992727	0.867188	1.02901	0.979709	0.981474	1.60593	1.07562	1.09669	1.10054	1.14168	1.20105	1.00924	1.0023	1.02501	1.03935	0.947337	1.46272	1.19698	0.9996	0.9993	0.824647	1.01157	1.1184	0.823164	1.04081	0.990644	1.00441	1.02768	1.02368	1.44398	1.08687	0.946107	1.0028	1.07983	1.0319	0.939413	1.34004	0.829859	0.939131	0.994913	1.14191	1.07423	1.15963	1.14077	1.03738	1.12042
542	chr2	77721736	78396336	0.992727	0.867188	1.02901	0.979709	0.981474	1.60593	1.07562	1.09669	1.10054	1.14168	1.20105	1.00924	1.0023	1.02501	1.03935	0.947337	1.1916	1.19698	0.9996	0.9993	0.824647	1.01157	1.1184	0.823164	1.04081	0.990644	1.00441	1.02768	1.02368	1.44398	1.08687	0.946107	1.0028	1.07983	1.0319	0.939413	1.34004	0.829859	0.939131	0.994913	1.14191	1.07423	1.15963	1.14077	1.03738	1.12042
543	chr2	78396337	79077951	0.992727	0.867188	1.02901	0.979709	0.981474	1.60593	1.07562	1.09669	1.10054	1.14168	1.20105	1.00924	1.0023	1.02501	1.03935	0.947337	1.1916	1.19698	0.9996	0.9993	0.824647	1.01157	1.1184	0.823164	1.04081	0.990644	1.00441	1.02768	1.02368	1.44398	1.08687	0.946107	1.0028	1.07983	1.0319	0.939413	1.34004	0.829859	0.939131	0.994913	1.14191	1.07423	1.15963	1.14077	1.03738	1.12042
544	chr2	79077952	79686895	0.992727	0.867188	1.02901	0.979709	0.981474	1.60593	1.07562	1.09669	1.10054	1.14168	1.20105	1.00924	1.0023	1.02501	1.03935	0.947337	1.1916	1.19698	0.9996	0.9993	0.824647	1.01157	1.1184	0.823164	1.04081	0.990644	1.00441	1.02768	1.02368	1.44398	1.08687	0.946107	1.0028	1.07983	1.0319	0.939413	1.34004	0.829859	0.939131	0.994913	1.14191	1.07423	1.15963	1.14077	1.03738	1.12042
545	chr2	79686896	80309846	0.992727	0.867188	1.02901	0.979709	0.981474	1.60593	1.07562	1.09669	1.10054	1.14168	1.20105	1.00924	1.0023	1.02501	1.03935	0.947337	1.1916	1.19698	0.9996	0.9993	0.824647	1.01157	1.1184	0.823164	1.04081	0.990644	1.00441	1.02768	1.02368	1.44398	1.08687	0.946107	1.0028	1.07983	1.0319	0.939413	1.34004	0.829859	0.939131	0.994913	1.14191	1.07423	1.15963	1.14077	1.03738	1.12042
546	chr2	80309847	80881050	0.992727	0.867188	1.02901	0.979709	0.981474	1.60593	1.07562	1.09669	1.10054	1.14168	1.20105	1.00924	1.0023	1.02501	1.03935	0.947337	1.1916	1.19698	0.9996	0.9993	0.824647	1.01157	1.1184	0.823164	1.04081	0.990644	1.00441	1.02768	1.02368	1.44398	1.08687	0.946107	1.0028	1.07983	1.0319	0.939413	1.34004	0.829859	0.939131	0.994913	1.14191	1.07423	1.15963	1.14077	1.03738	1.12042
547	chr2	80881051	81525673	0.992727	0.867188	1.02901	0.979709	0.981474	1.60593	1.07562	1.09669	1.10054	1.14168	1.20105	1.00924	1.0023	1.02501	1.03935	0.947337	1.1916	1.19698	0.9996	0.9993	0.824647	1.01157	1.1184	0.823164	1.04081	0.990644	1.00441	1.02768	1.02368	1.44398	1.08687	0.946107	1.0028	1.07983	1.0319	0.939413	1.34004	0.829859	0.939131	0.994913	1.14191	1.07423	1.15963	1.14077	1.03738	1.12042
548	chr2	81525674	82188437	0.992727	0.867188	1.02901	0.979709	0.981474	1.60593	1.07562	1.09669	1.10054	1.14168	1.20105	1.00924	1.0023	1.02501	1.03935	0.947337	1.54018	1.19698	0.9996	0.9993	0.824647	1.01157	1.1184	0.823164	1.04081	0.990644	1.00441	1.02768	1.02368	1.44398	1.08687	0.946107	1.0028	1.07983	1.0319	0.939413	1.34004	0.829859	0.939131	0.994913	1.14191	1.07423	1.15963	1.14077	1.03738	1.12042
549	chr2	82188438	82849380	0.992727	0.867188	1.02901	0.979709	0.981474	1.60593	1.07562	1.09669	1.10054	1.14168	1.20105	1.00924	1.0023	1.02501	1.03935	0.947337	1.54018	1.19698	0.9996	0.9993	0.824647	1.01157	1.1184	0.823164	1.04081	0.990644	1.00441	1.02768	1.02368	1.44398	1.08687	0.946107	1.0028	1.07983	1.0319	0.939413	1.34004	0.829859	0.939131	0.994913	1.14191	1.07423	1.15963	1.14077	1.03738	1.12042
550	chr2	82849381	83522916	0.992727	0.867188	1.02901	0.979709	0.981474	1.60593	1.07562	1.09669	1.10054	1.14168	1.20105	1.00924	1.0023	1.02501	1.03935	0.947337	1.54018	1.19698	0.9996	0.9993	0.824647	1.01157	1.1184	0.823164	1.04081	0.990644	1.00441	1.02768	1.02368	1.44398	1.08687	0.946107	1.0028	1.07983	1.0319	0.939413	1.34004	0.829859	0.939131	0.994913	1.14191	1.07423	1.15963	1.14077	1.03738	1.12042
551	chr2	83522917	84187079	0.992727	0.867188	1.02901	0.979709	0.981474	1.60593	1.07562	1.09669	1.10054	1.14168	1.20105	1.00924	1.0023	1.02501	1.03935	0.947337	1.54018	1.19698	0.9996	0.9993	0.824647	1.01157	1.1184	0.823164	1.04081	0.990644	1.00441	1.02768	1.02368	1.44398	1.08687	0.946107	1.0028	1.07983	1.0319	0.939413	1.34004	0.829859	0.939131	0.994913	1.14191	1.07423	1.15963	1.14077	1.03738	1.12042
552	chr2	84187080	84773604	0.992727	0.867188	1.02901	0.979709	0.981474	1.60593	1.07562	1.09669	1.10054	1.14168	1.20105	1.00924	1.0023	1.02501	1.03935	0.947337	1.54018	1.19698	0.9996	0.9993	0.824647	1.01157	1.1184	0.823164	1.04081	0.990644	1.00441	1.02768	1.02368	1.44398	1.08687	0.946107	1.0028	1.07983	1.0319	0.939413	1.34004	0.829859	0.939131	0.994913	1.14191	1.07423	1.15963	1.14077	1.03738	1.12042
553	chr2	84773605	85341617	0.992727	0.867188	1.02901	0.979709	0.981474	1.60593	1.07562	1.09669	1.10054	1.14168	1.20105	1.00924	1.0023	1.02501	1.03935	0.947337	0.991239	1.19698	0.9996	0.9993	0.824647	1.01157	1.1184	0.823164	1.04081	0.990644	1.00441	1.02768	1.02368	1.44398	0.927094	0.946107	1.0028	1.07983	1.0319	0.939413	1.34004	0.829859	0.939131	0.994913	1.14191	1.07423	1.15963	1.14077	1.03738	1.12042
554	chr2	85341618	85881287	0.992727	0.867188	1.02901	0.979709	0.981474	1.60593	1.07562	1.09669	1.10054	1.14168	1.20105	1.00924	1.0023	1.02501	1.03935	0.947337	0.991239	1.19698	0.9996	0.9993	0.824647	1.01157	1.1184	0.823164	1.04081	0.990644	1.00441	1.02768	1.02368	1.44398	0.927094	0.946107	1.0028	1.07983	1.0319	0.939413	1.34004	0.829859	0.939131	0.994913	1.14191	1.07423	1.15963	1.14077	1.03738	1.12042
555	chr2	85881288	86385617	0.992727	0.867188	1.02901	0.979709	0.981474	1.60593	1.07562	1.09669	1.10054	1.14168	1.20105	1.00924	1.0023	1.02501	1.03935	0.947337	0.991239	1.19698	0.9996	0.9993	0.824647	1.01157	1.1184	0.823164	1.04081	0.990644	1.00441	1.02768	1.02368	1.44398	0.927094	0.946107	1.0028	1.07983	1.0319	0.939413	1.34004	0.829859	0.939131	0.994913	1.14191	1.07423	1.15963	1.14077	1.03738	1.12042
556	chr2	86385618	86952224	0.992727	0.867188	1.02901	0.979709	0.981474	1.60593	1.07562	1.09669	1.10054	1.14168	1.20105	1.00924	1.0023	1.02501	1.03935	0.947337	0.991239	1.19698	0.9996	0.9993	0.824647	1.01157	1.1184	0.823164	1.04081	0.990644	1.00441	1.02768	1.02368	1.44398	0.927094	0.946107	1.0028	1.07983	1.0319	0.939413	1.34004	0.829859	0.939131	0.994913	1.14191	1.07423	1.15963	1.14077	1.03738	1.12042
557	chr2	86952225	87406383	0.992727	0.867188	1.02901	0.979709	0.981474	1.60593	1.07562	1.09669	1.10054	1.14168	1.20105	1.00924	1.0023	1.02501	1.03935	0.947337	0.991239	1.19698	0.9996	0.9993	0.824647	1.01157	1.1184	0.823164	1.04081	0.990644	1.00441	1.02768	1.02368	1.44398	0.927094	0.946107	1.0028	1.07983	1.0319	0.939413	1.34004	0.829859	0.939131	0.994913	1.14191	1.07423	1.15963	1.14077	1.03738	1.12042
558	chr2	87406384	87856190	0.992727	0.867188	1.02901	0.979709	0.981474	1.60593	1.07562	1.09669	1.10054	1.14168	1.20105	1.00924	1.0023	1.02501	1.03935	0.947337	0.991239	1.19698	0.9996	0.9993	0.824647	1.01157	1.1184	0.823164	1.04081	0.990644	1.00441	1.02768	1.02368	1.44398	0.927094	0.946107	1.0028	1.07983	1.0319	0.939413	1.34004	0.829859	0.939131	0.994913	1.14191	1.07423	1.15963	1.14077	1.03738	1.12042
559	chr2	87856191	88313313	0.992727	0.867188	1.02901	0.979709	0.981474	1.60593	1.07562	1.09669	1.10054	1.14168	1.20105	1.00924	1.0023	1.02501	1.03935	0.947337	0.991239	1.19698	0.9996	0.9993	0.824647	1.01157	1.1184	0.823164	1.04081	0.990644	1.00441	1.02768	1.02368	1.44398	0.927094	0.946107	1.0028	1.07983	1.0319	0.939413	1.34004	0.829859	0.939131	0.994913	1.14191	1.07423	1.15963	1.14077	1.03738	1.12042
560	chr2	88313314	88882051	0.992727	0.867188	1.02901	0.979709	0.981474	1.60593	1.07562	0.615944	1.10054	0.980395	1.20105	1.00924	1.0023	1.02501	1.03935	0.947337	0.991239	1.19698	0.9996	0.9993	0.824647	1.01157	1.1184	0.823164	1.04081	0.990644	1.00441	1.02768	1.02368	1.44398	0.927094	0.946107	1.0028	1.07983	1.0319	0.939413	1.34004	0.829859	0.939131	0.994913	1.14191	1.07423	1.15963	1.14077	1.03738	1.12042
561	chr2	88882052	89438130	0.992727	0.867188	1.02901	0.979709	0.981474	1.17704	1.07562	0.615944	1.10054	0.980395	1.20105	1.00924	1.0023	1.02501	1.03935	0.947337	0.991239	1.19698	0.9996	0.9993	0.824647	1.01157	1.1184	0.823164	1.04081	0.990644	1.00441	1.02768	1.02368	1.44398	0.927094	0.946107	1.0028	1.07983	1.0319	0.939413	1.34004	0.829859	0.939131	0.994913	1.14191	1.07423	0.692394	1.14077	1.03738	0.528401
562	chr2	89438131	90043760	0.992727	0.867188	1.02901	0.979709	0.981474	1.17704	1.07562	0.615944	1.10054	0.980395	1.20105	1.00924	1.0023	1.02501	1.03935	0.947337	0.991239	1.19698	0.9996	0.9993	0.824647	1.01157	1.1184	0.823164	1.04081	0.990644	1.00441	1.02768	1.02368	1.44398	0.927094	0.946107	1.0028	1.07983	1.0319	0.939413	1.34004	0.829859	0.939131	0.994913	1.14191	1.07423	0.692394	1.14077	1.03738	0.528401
563	chr2	90043761	90396700	0.992727	0.867188	1.02901	0.979709	0.981474	1.17704	1.07562	0.615944	1.10054	0.980395	1.20105	1.00924	1.0023	1.02501	1.03935	0.947337	0.991239	1.19698	0.9996	0.9993	0.824647	1.01157	1.1184	0.823164	1.04081	0.990644	1.00441	1.02768	1.02368	1.44398	0.927094	0.946107	1.0028	1.07983	1.0319	0.939413	1.34004	0.829859	0.939131	0.994913	1.14191	1.07423	0.692394	1.14077	1.03738	0.528401
564	chr2	90396701	91623196	0.992727	0.867188	1.02901	0.979709	0.981474	1.17704	1.07562	1.05064	1.10054	0.980395	1.20105	1.00924	1.0023	1.02501	1.03935	0.947337	0.991239	1.19698	0.9996	0.9993	0.824647	1.01157	1.1184	0.823164	1.04081	0.990644	1.00441	1.02768	1.02368	1.44398	0.927094	0.946107	1.0028	1.07983	1.0319	0.939413	1.34004	0.829859	0.939131	0.994913	1.14191	1.07423	1.14855	1.14077	1.03738	0.528401
565	chr2	91623197	91788929	0.992727	0.867188	1.02901	0.979709	0.981474	1.17704	1.07562	1.05064	1.10054	0.980395	1.20105	1.00924	1.0023	1.02501	1.03935	0.947337	0.991239	1.19698	0.9996	0.9993	0.824647	1.01157	1.1184	0.823164	1.04081	0.990644	1.00441	1.02768	1.02368	1.44398	0.927094	0.946107	1.0028	1.07983	1.0319	0.939413	1.34004	0.829859	0.939131	0.994913	1.14191	1.07423	1.14855	1.14077	1.03738	0.528401
566	chr2	91788930	91950622	0.992727	0.867188	1.02901	0.979709	0.981474	1.17704	1.07562	1.05064	1.10054	0.980395	1.20105	1.00924	1.0023	1.02501	1.03935	0.947337	0.991239	1.19698	0.9996	0.9993	0.824647	1.01157	1.1184	0.823164	1.04081	0.990644	1.00441	1.02768	1.02368	1.44398	0.927094	0.946107	1.0028	1.07983	1.0319	0.939413	1.34004	0.829859	0.939131	0.994913	1.14191	1.07423	1.14855	1.14077	1.03738	0.528401
567	chr2	91950623	92266805	0.992727	0.867188	1.02901	0.979709	0.981474	1.17704	1.07562	1.05064	1.10054	0.980395	1.20105	1.00924	1.0023	1.02501	1.03935	0.947337	0.991239	1.19698	0.9996	0.9993	0.935008	1.01157	1.1184	0.823164	1.04081	1.16253	1.00441	1.02768	1.02368	1.44398	0.927094	0.946107	1.0028	1.07983	1.0319	1.53465	1.34004	0.829859	0.939131	0.994913	1.14191	1.07423	1.14855	1.14077	1.03738	0.528401
568	chr2	92266806	92313616	0.992727	0.867188	1.02901	0.979709	0.981474	2.1968	1.07562	1.05064	1.10054	0.980395	1.20105	1.00924	1.0023	1.02501	1.03935	1.76615	0.991239	1.19698	0.9996	0.9993	0.935008	1.01157	2.45543	0.823164	1.04081	1.16253	1.00441	1.02768	1.02368	1.44398	1.13678	0.946107	2.12081	1.6822	1.0319	1.53465	1.34004	0.829859	0.939131	0.994913	1.14191	1.07423	1.14855	1.14077	1.03738	0.528401
569	chr2	92313617	95480405	0.992727	0.867188	1.02901	0.979709	0.981474	2.1968	1.07562	1.05064	1.10054	0.980395	1.20105	1.00924	1.0023	1.02501	1.03935	1.76615	0.991239	1.19698	0.9996	0.9993	0.935008	1.01157	2.45543	0.823164	1.04081	1.16253	1.00441	1.02768	1.02368	1.44398	1.13678	0.946107	2.12081	1.6822	1.0319	1.53465	1.34004	0.829859	0.939131	0.994913	1.14191	1.07423	1.14855	1.14077	1.03738	0.528401
570	chr2	95480406	96029491	0.992727	0.867188	1.02901	0.979709	0.981474	2.1968	1.07562	1.05064	1.10054	0.980395	1.20105	1.00924	1.0023	1.02501	1.03935	0.99233	0.991239	1.19698	0.9996	0.9993	0.935008	1.01157	1.11997	0.823164	1.04081	1.16253	1.00441	1.02768	1.02368	1.44398	1.13678	0.946107	0.996506	1.08546	1.0319	0.937349	1.34004	0.829859	0.939131	0.994913	1.14191	1.07423	1.14855	1.14077	1.03738	1.05887
571	chr2	96029492	96477519	0.992727	0.867188	1.02901	0.979709	0.981474	2.1968	1.07562	1.05064	1.10054	0.980395	1.20105	1.00924	1.0023	1.02501	1.03935	0.99233	0.991239	1.19698	0.9996	0.9993	0.935008	1.01157	1.11997	0.823164	1.04081	1.16253	1.00441	1.02768	1.02368	1.44398	1.13678	0.946107	0.996506	1.08546	1.0319	0.937349	1.34004	0.829859	0.939131	0.994913	1.14191	1.07423	1.14855	1.14077	1.03738	1.05887
572	chr2	96477520	97000036	0.992727	0.867188	1.02901	0.979709	0.981474	1.06301	1.07562	1.05064	1.10054	0.980395	1.20105	1.00924	1.0023	1.02501	1.03935	0.99233	0.991239	1.19698	0.9996	0.9993	0.935008	1.01157	1.11997	0.823164	1.04081	1.16253	1.00441	1.02768	1.02368	1.44398	1.13678	0.946107	0.996506	1.08546	1.0319	0.937349	1.34004	0.829859	0.939131	0.994913	1.14191	1.07423	1.14855	1.14077	1.03738	1.05887
573	chr2	97000037	97577219	0.992727	0.867188	1.02901	0.979709	0.981474	1.06301	1.07562	1.05064	1.10054	0.980395	1.20105	1.00924	1.0023	1.02501	1.03935	0.99233	0.991239	1.19698	0.9996	0.9993	0.935008	1.01157	1.11997	0.823164	1.04081	1.16253	1.00441	1.02768	1.02368	1.44398	1.13678	0.946107	0.996506	1.08546	1.0319	0.937349	1.34004	0.829859	0.939131	0.994913	1.14191	1.07423	1.14855	1.14077	1.03738	1.05887
574	chr2	97577220	98061464	0.992727	0.867188	1.02901	0.979709	0.981474	1.06301	1.07562	1.05064	1.10054	0.980395	1.20105	1.00924	1.0023	1.02501	1.03935	0.99233	0.991239	1.19698	0.9996	0.9993	0.935008	1.01157	1.11997	0.823164	1.04081	1.16253	1.00441	1.02768	1.02368	1.44398	1.13678	0.946107	0.996506	1.08546	1.0319	0.937349	1.34004	0.829859	0.939131	0.994913	1.14191	1.07423	1.14855	1.14077	1.03738	1.05887
575	chr2	98061465	98574590	0.992727	0.867188	1.02901	0.979709	0.981474	1.06301	1.07562	1.05064	1.10054	0.980395	1.20105	1.00924	1.0023	1.02501	1.03935	0.99233	0.991239	1.19698	0.9996	0.9993	0.935008	1.01157	1.11997	0.823164	1.04081	1.16253	1.00441	1.02768	1.02368	1.44398	1.13678	0.946107	0.996506	1.08546	1.0319	0.937349	0.575509	0.829859	0.939131	0.994913	1.14191	1.07423	1.14855	1.14077	1.03738	1.05887
576	chr2	98574591	99123023	0.992727	0.867188	1.02901	0.979709	0.981474	1.06301	1.07562	1.05064	1.10054	0.980395	1.20105	1.00924	1.0023	1.02501	1.03935	0.99233	0.991239	1.19698	0.9996	0.9993	0.935008	1.01157	1.11997	0.823164	1.04081	1.16253	1.00441	1.02768	1.02368	1.44398	1.13678	0.946107	0.996506	1.08546	1.0319	0.937349	0.575509	0.829859	0.939131	0.994913	1.14191	1.07423	1.14855	1.14077	1.03738	1.05887
577	chr2	99123024	99669347	0.992727	0.867188	1.02901	0.979709	0.981474	1.06301	1.07562	1.05064	1.10054	0.980395	1.20105	1.00924	1.0023	1.02501	1.03935	0.99233	0.991239	1.19698	0.9996	0.9993	0.935008	1.01157	1.11997	0.823164	1.04081	1.16253	1.00441	1.02768	1.02368	1.44398	1.13678	0.946107	0.996506	1.08546	1.0319	0.937349	0.575509	0.829859	0.939131	0.994913	1.14191	1.07423	1.14855	1.14077	1.03738	1.05887
578	chr2	99669348	100247789	0.992727	0.867188	1.02901	0.979709	0.981474	1.06301	1.07562	1.05064	1.10054	0.980395	1.20105	1.00924	1.0023	1.02501	1.03935	0.99233	0.991239	0.972972	0.9996	0.9993	0.935008	1.01157	1.11997	0.823164	1.04081	1.16253	1.00441	1.02768	1.02368	1.44398	1.13678	0.946107	0.996506	1.08546	1.0319	0.937349	0.575509	0.829859	0.939131	0.994913	1.14191	1.07423	1.14855	1.14077	1.03738	1.05887
579	chr2	100247790	100790488	0.992727	0.867188	1.02901	0.979709	0.981474	1.06301	1.07562	1.05064	1.10054	0.980395	1.20105	1.00924	1.0023	1.02501	1.03935	0.99233	0.991239	0.972972	0.9996	0.9993	0.935008	1.01157	1.11997	0.823164	1.04081	1.16253	1.00441	1.02768	1.02368	1.44398	1.13678	0.946107	0.996506	1.08546	1.0319	0.937349	0.575509	0.829859	0.939131	0.994913	1.14191	1.07423	1.14855	1.14077	1.03738	1.05887
580	chr2	100790489	101323799	0.992727	0.867188	1.02901	0.979709	0.981474	1.06301	1.07562	1.05064	1.10054	0.980395	1.20105	1.00924	1.0023	1.02501	1.03935	0.99233	0.991239	0.972972	0.9996	0.9993	0.935008	1.01157	1.11997	0.823164	1.04081	1.16253	1.00441	1.02768	1.02368	1.44398	1.13678	0.946107	0.996506	1.08546	1.0319	0.937349	0.575509	0.829859	0.939131	0.994913	1.14191	1.07423	1.14855	1.14077	1.03738	1.05887
581	chr2	101323800	101861752	0.992727	0.867188	1.02901	0.979709	0.981474	1.06301	1.07562	1.05064	1.10054	0.980395	1.20105	1.00924	1.0023	1.02501	1.03935	0.99233	0.991239	0.972972	0.9996	0.9993	0.935008	1.01157	1.11997	0.823164	1.04081	1.16253	1.00441	1.02768	1.02368	1.44398	1.13678	0.946107	0.996506	1.08546	1.0319	0.937349	0.575509	0.829859	0.939131	0.994913	1.14191	1.07423	1.14855	1.14077	1.03738	1.05887
582	chr2	101861753	102414623	0.992727	0.867188	1.02901	0.979709	0.981474	1.06301	1.07562	1.05064	1.10054	1.12851	1.20105	1.00924	1.0023	1.02501	1.03935	0.99233	0.991239	0.972972	0.9996	0.9993	0.935008	1.01157	1.11997	0.823164	1.04081	1.16253	1.00441	1.02768	1.02368	1.44398	1.13678	0.946107	0.996506	1.08546	1.0319	0.937349	0.575509	0.829859	0.939131	0.994913	1.14191	1.07423	1.14855	1.14077	1.03738	1.05887
583	chr2	102414624	102934720	0.992727	0.867188	1.02901	0.979709	0.981474	1.06301	1.07562	1.05064	1.10054	1.12851	1.20105	1.00924	1.0023	1.02501	1.03935	0.99233	0.991239	0.972972	0.9996	0.9993	0.935008	1.01157	1.11997	0.823164	1.04081	1.16253	1.00441	1.02768	1.02368	1.44398	1.13678	0.946107	0.996506	1.08546	1.0319	0.937349	0.575509	0.829859	0.939131	0.994913	1.14191	1.07423	1.14855	1.14077	1.03738	1.05887
584	chr2	102934721	103521338	0.992727	0.867188	1.02901	0.979709	0.981474	1.06301	1.07562	1.05064	1.10054	1.12851	1.20105	1.00924	1.0023	1.02501	1.03935	0.99233	0.991239	0.972972	0.9996	0.9993	0.935008	1.01157	1.11997	0.823164	1.04081	1.16253	1.00441	1.02768	1.02368	1.44398	1.13678	0.946107	0.996506	1.08546	1.0319	0.937349	0.575509	0.829859	0.939131	0.994913	1.14191	1.07423	1.14855	1.14077	1.03738	1.05887
585	chr2	103521339	104118937	0.992727	0.867188	1.02901	0.979709	0.981474	1.31023	1.07562	1.05064	1.10054	1.12851	1.20105	1.00924	1.0023	1.02501	1.03935	0.99233	0.991239	0.972972	0.9996	0.9993	0.935008	1.01157	1.11997	0.823164	1.04081	1.16253	1.00441	1.02768	1.02368	1.44398	1.13678	0.946107	0.996506	1.08546	1.0319	0.937349	0.575509	0.829859	0.939131	0.994913	1.14191	1.07423	1.14855	1.14077	1.03738	1.05887
586	chr2	104118938	104756436	0.992727	0.867188	1.02901	0.979709	0.981474	1.31023	1.07562	1.05064	1.10054	1.12851	1.20105	1.00924	1.0023	1.02501	1.03935	0.99233	0.991239	0.972972	0.9996	0.9993	0.935008	1.01157	1.11997	0.823164	1.04081	1.16253	1.00441	1.02768	1.02368	1.44398	1.13678	0.946107	0.996506	1.08546	1.0319	0.937349	0.575509	0.829859	0.939131	0.994913	1.14191	1.07423	1.14855	1.14077	1.03738	1.05887
587	chr2	104756437	105343470	1.07176	0.867188	1.02901	0.979709	0.981474	1.31023	1.07562	1.05064	1.10054	1.12851	1.20105	1.00924	1.0023	1.02501	1.03935	0.99233	0.991239	0.972972	0.9996	0.9993	0.935008	1.01157	1.11997	0.823164	1.04081	1.16253	1.00441	1.02768	1.02368	1.44398	1.13678	0.946107	0.996506	1.08546	1.0319	0.937349	0.575509	0.829859	0.939131	0.994913	1.14191	1.07423	1.14855	1.14077	1.03738	1.05887
588	chr2	105343471	105904978	1.07176	0.867188	1.02901	0.979709	0.981474	1.31023	1.07562	1.05064	1.10054	1.12851	1.20105	1.00924	1.0023	1.02501	1.03935	0.99233	0.991239	0.972972	0.9996	0.9993	0.935008	1.01157	1.11997	0.823164	1.04081	1.16253	1.00441	1.02768	1.02368	1.44398	1.13678	0.946107	0.996506	1.08546	1.0319	0.937349	0.575509	0.829859	0.939131	0.994913	1.14191	1.07423	1.14855	1.14077	1.03738	1.05887
589	chr2	105904979	106425772	1.07176	0.867188	1.02901	0.979709	0.981474	1.31023	1.07562	1.05064	1.10054	1.12851	1.20105	1.00924	1.0023	1.02501	1.03935	0.99233	0.991239	0.972972	0.9996	0.9993	0.935008	1.01157	1.11997	0.823164	1.04081	1.16253	1.00441	1.02768	1.02368	1.44398	1.13678	0.946107	0.996506	1.08546	1.0319	0.937349	0.575509	0.829859	0.939131	0.994913	1.14191	1.07423	1.14855	1.14077	1.03738	1.05887
590	chr2	106425773	106988521	1.07176	0.867188	1.02901	0.979709	0.981474	1.31023	1.07562	1.05064	1.10054	1.12851	1.20105	1.00924	1.0023	1.02501	1.03935	0.99233	0.991239	0.972972	0.9996	0.9993	0.935008	1.01157	1.11997	1.12401	1.04081	1.16253	1.00441	1.02768	1.02368	1.44398	1.13678	0.946107	0.996506	1.08546	1.0319	0.937349	0.575509	0.829859	0.939131	0.994913	1.14191	1.07423	1.14855	1.14077	1.03738	1.05887
591	chr2	106988522	107521543	1.07176	1.15212	1.02901	0.979709	0.981474	1.31023	1.07562	1.05064	1.10054	1.12851	1.20105	1.00924	1.0023	1.02501	1.03935	0.99233	0.991239	0.972972	0.9996	0.9993	0.935008	1.01157	1.11997	1.12401	1.04081	1.16253	1.00441	1.02768	1.02368	1.44398	1.13678	0.946107	0.996506	1.08546	1.0319	0.937349	0.575509	0.829859	0.939131	0.994913	1.14191	1.24982	1.14855	1.14077	1.03738	1.05887
592	chr2	107521544	108131095	1.07176	1.15212	1.02901	0.979709	0.981474	1.31023	1.07562	1.05064	1.10054	1.12851	1.20105	1.00924	1.0023	1.02501	1.03935	0.99233	0.991239	0.972972	0.9996	0.9993	0.935008	1.01157	1.11997	1.12401	1.04081	1.16253	1.00441	1.02768	1.02368	1.44398	0.863467	0.946107	0.996506	1.08546	1.0319	0.937349	0.575509	0.829859	1.24061	0.994913	1.14191	1.24982	1.14855	1.14077	1.03738	1.05887
593	chr2	108131096	108701676	1.07176	1.15212	1.02901	0.979709	0.981474	0.887364	1.07562	1.05064	1.10054	1.12851	1.20105	1.00924	1.0023	1.02501	1.03935	0.99233	0.991239	0.972972	0.9996	0.9993	0.935008	1.01157	1.11997	1.12401	1.04081	1.16253	1.00441	1.02768	1.02368	1.44398	0.863467	0.946107	0.996506	1.08546	1.0319	0.937349	0.575509	0.829859	1.24061	0.994913	1.14191	1.24982	1.14855	1.14077	1.03738	1.05887
594	chr2	108701677	109295413	1.07176	1.15212	1.02901	0.979709	0.981474	0.887364	1.07562	1.05064	1.10054	1.12851	1.20105	1.00924	1.0023	1.02501	1.03935	0.99233	0.991239	0.972972	0.9996	0.9993	0.935008	1.01157	1.11997	1.12401	1.04081	1.16253	1.00441	1.02768	1.02368	1.44398	0.863467	0.946107	0.996506	1.08546	1.0319	0.937349	0.575509	0.829859	1.24061	0.994913	1.14191	1.24982	1.14855	1.14077	1.03738	1.05887
595	chr2	109295414	109834054	1.07176	1.15212	1.02901	0.979709	0.981474	0.887364	1.07562	1.05064	1.10054	1.12851	1.20105	1.00924	1.0023	1.02501	1.03935	0.99233	0.991239	0.972972	0.9996	0.9993	0.935008	1.01157	1.11997	1.12401	1.04081	1.16253	1.00441	1.02768	1.02368	1.44398	0.863467	0.946107	0.996506	1.08546	1.0319	0.937349	0.575509	0.829859	1.24061	0.994913	1.14191	1.24982	1.14855	1.14077	1.03738	1.05887
596	chr2	109834055	110478999	1.07176	1.15212	1.02901	0.979709	0.981474	0.887364	1.07562	1.05064	1.10054	1.12851	1.20105	1.00924	1.0023	1.02501	1.03935	0.99233	0.991239	0.972972	0.9996	0.9993	0.935008	1.01157	1.11997	1.12401	1.04081	1.16253	1.00441	1.02768	1.02368	1.44398	0.863467	0.946107	0.996506	1.08546	1.0319	0.937349	0.575509	0.829859	1.24061	0.994913	1.14191	1.24982	1.14855	1.14077	1.03738	1.05887
597	chr2	110479000	110854524	1.07176	1.15212	1.02901	0.979709	0.981474	0.887364	1.07562	1.05064	1.10054	1.12851	1.20105	1.00924	1.0023	1.02501	1.03935	0.99233	0.991239	0.972972	0.9996	0.9993	0.935008	1.01157	1.11997	1.12401	1.04081	1.16253	1.00441	1.02768	1.02368	1.44398	0.863467	0.946107	0.996506	1.08546	1.0319	0.937349	0.575509	0.829859	1.24061	0.994913	1.14191	1.24982	1.14855	1.14077	1.03738	1.05887
598	chr2	110854525	111276346	1.07176	1.15212	1.02901	0.979709	0.981474	0.887364	1.07562	1.05064	1.10054	1.12851	1.20105	1.00924	1.0023	1.02501	1.03935	0.99233	0.991239	0.972972	0.9996	0.9993	0.935008	1.01157	1.11997	1.12401	1.04081	1.16253	1.00441	1.02768	1.02368	1.44398	0.863467	0.946107	0.996506	1.08546	1.0319	0.937349	0.575509	0.829859	1.24061	0.994913	1.14191	1.24982	1.14855	1.14077	1.03738	1.05887
599	chr2	111276347	111741156	1.07176	1.15212	1.02901	0.979709	0.981474	0.887364	1.07562	1.05064	1.10054	1.12851	1.20105	1.00924	1.0023	1.02501	1.03935	0.99233	0.991239	0.972972	0.9996	0.9993	0.935008	1.01157	1.11997	1.12401	1.04081	1.16253	1.00441	1.02768	1.02368	1.44398	0.863467	0.946107	0.996506	1.08546	1.0319	0.937349	0.575509	0.829859	1.24061	0.994913	1.14191	1.24982	1.14855	1.14077	1.03738	1.05887
600	chr2	111741157	112186360	1.07176	1.15212	1.02901	0.979709	0.981474	0.887364	1.07562	1.05064	1.10054	1.12851	1.20105	1.00924	1.0023	1.02501	1.03935	0.99233	0.991239	0.972972	0.9996	0.9993	0.935008	1.01157	1.11997	0.830938	1.04081	1.16253	1.00441	1.02768	1.02368	1.44398	0.863467	0.946107	0.996506	1.08546	1.0319	0.937349	0.575509	0.829859	1.24061	0.994913	1.14191	1.24982	1.14855	1.14077	1.03738	1.05887
601	chr2	112186361	112604089	1.07176	1.15212	1.02901	0.979709	0.981474	0.887364	1.07562	1.05064	1.10054	1.12851	1.20105	1.00924	1.0023	1.02501	1.03935	0.99233	0.991239	0.972972	0.9996	0.9993	0.935008	1.01157	1.11997	0.830938	1.04081	1.16253	1.00441	1.02768	1.02368	1.44398	0.863467	0.946107	0.996506	1.08546	1.0319	0.937349	0.575509	0.829859	1.24061	0.994913	1.14191	1.24982	1.14855	1.14077	1.03738	1.05887
602	chr2	112604090	113146234	1.07176	1.15212	1.02901	0.979709	0.981474	0.887364	1.07562	1.05064	1.10054	1.12851	1.20105	1.00924	1.0023	1.02501	1.03935	0.99233	0.991239	0.972972	0.9996	0.9993	0.935008	1.01157	1.11997	0.830938	1.04081	1.16253	1.00441	1.02768	1.02368	1.44398	0.863467	0.946107	0.996506	1.08546	1.0319	0.937349	0.575509	0.829859	1.24061	0.994913	1.14191	1.24982	1.14855	1.14077	1.03738	1.05887
603	chr2	113146235	113659427	1.07176	1.15212	1.02901	0.979709	0.981474	0.887364	1.07562	1.05064	1.10054	1.12851	1.20105	1.00924	1.0023	1.02501	1.03935	0.99233	0.686602	0.972972	0.9996	0.9993	0.935008	1.01157	1.11997	0.830938	1.04081	1.16253	1.00441	1.02768	1.02368	1.44398	0.863467	0.946107	0.996506	1.08546	1.0319	0.937349	0.575509	0.829859	1.24061	0.994913	1.14191	1.24982	1.14855	1.14077	1.03738	1.05887
604	chr2	113659428	114189445	1.07176	1.15212	1.02901	0.979709	0.981474	0.887364	1.07562	1.05064	1.10054	1.12851	1.20105	1.00924	1.0023	1.02501	1.03935	0.99233	0.686602	0.972972	0.9996	0.9993	0.935008	1.01157	1.11997	0.830938	1.04081	1.16253	1.00441	1.02768	1.02368	1.44398	0.863467	0.946107	0.996506	1.08546	1.0319	0.937349	0.575509	0.829859	1.24061	0.994913	1.14191	1.24982	1.14855	1.14077	1.03738	1.05887
605	chr2	114189446	114666637	1.07176	1.15212	1.02901	0.979709	0.981474	0.887364	1.07562	1.05064	1.10054	1.12851	1.20105	1.00924	1.0023	1.02501	1.03935	0.99233	0.686602	0.972972	0.9996	0.9993	0.935008	1.01157	1.11997	0.830938	1.04081	1.16253	1.00441	1.02768	1.02368	1.44398	0.863467	0.946107	0.996506	1.08546	1.0319	0.937349	0.575509	0.829859	1.24061	0.994913	1.14191	1.24982	1.14855	1.14077	1.03738	1.05887
606	chr2	114666638	115234424	1.07176	1.15212	1.02901	0.979709	0.981474	0.887364	0.821683	1.05064	1.10054	1.12851	1.20105	1.00924	1.0023	1.02501	1.03935	0.99233	0.686602	0.972972	0.9996	0.9993	0.935008	1.01157	1.11997	1.1971	1.04081	1.16253	1.00441	1.02768	1.02368	1.44398	0.863467	0.946107	0.996506	1.08546	1.0319	0.937349	0.575509	0.829859	1.24061	0.994913	1.14191	1.24982	1.14855	1.14077	1.03738	1.05887
607	chr2	115234425	115839906	1.07176	1.15212	1.02901	0.979709	0.981474	0.887364	0.821683	1.05064	1.10054	1.12851	1.20105	1.00924	1.0023	1.02501	1.03935	0.99233	0.686602	0.972972	0.9996	0.9993	0.935008	1.01157	1.11997	1.1971	1.04081	1.16253	1.00441	1.02768	1.02368	1.44398	0.863467	0.946107	0.996506	1.08546	1.0319	0.937349	0.575509	0.829859	1.24061	0.994913	1.14191	1.24982	1.14855	1.14077	1.03738	1.05887
608	chr2	115839907	116509997	1.07176	1.15212	1.02901	0.979709	0.981474	0.887364	0.821683	1.05064	1.10054	1.12851	1.20105	1.00924	1.0023	1.02501	1.03935	0.99233	0.686602	0.972972	0.9996	0.9993	0.935008	1.01157	1.11997	1.1971	1.04081	1.16253	1.00441	1.02768	1.02368	1.44398	0.863467	0.946107	0.996506	1.08546	1.0319	0.937349	0.575509	0.829859	1.24061	0.994913	1.14191	1.24982	1.14855	1.14077	1.03738	1.05887
609	chr2	116509998	117203011	1.07176	1.15212	1.02901	0.979709	0.981474	0.887364	0.821683	1.05064	1.10054	1.12851	1.20105	1.00924	1.0023	1.02501	1.03935	0.99233	0.686602	0.972972	0.9996	0.9993	0.935008	1.01157	1.11997	1.1971	1.04081	1.16253	1.00441	1.02768	1.02368	1.28364	0.863467	0.946107	0.996506	1.08546	1.0319	0.937349	0.575509	0.829859	1.24061	0.994913	1.14191	1.24982	1.14855	1.14077	1.03738	1.05887
610	chr2	117203012	117858169	1.07176	1.15212	1.02901	0.979709	0.981474	0.887364	0.821683	1.05064	1.10054	1.12851	1.20105	1.00924	1.0023	1.02501	1.03935	0.99233	0.686602	0.972972	0.9996	0.9993	0.935008	1.01157	1.11997	1.1971	1.04081	1.16253	1.00441	1.02768	1.02368	1.28364	0.863467	0.946107	0.996506	1.08546	1.0319	0.937349	0.575509	0.829859	1.24061	0.994913	1.14191	1.24982	1.14855	1.14077	1.03738	1.05887
611	chr2	117858170	118475096	1.07176	1.15212	1.02901	0.979709	0.981474	0.887364	0.821683	1.05064	1.10054	1.12851	1.20105	1.00924	1.0023	1.02501	1.03935	0.99233	0.686602	0.972972	0.9996	0.9993	0.935008	1.01157	1.11997	1.1971	1.04081	1.16253	1.00441	1.02768	1.02368	1.28364	0.863467	0.946107	0.996506	1.08546	1.0319	0.937349	0.575509	0.829859	1.24061	0.994913	1.14191	1.24982	1.14855	1.14077	1.03738	1.05887
612	chr2	118475097	119034876	1.07176	1.15212	1.02901	0.979709	0.981474	0.887364	0.821683	1.05064	1.10054	1.12851	1.20105	1.00924	1.0023	1.02501	1.03935	0.99233	0.686602	0.972972	0.9996	0.9993	0.935008	1.01157	1.11997	1.1971	1.04081	1.16253	1.00441	1.02768	1.02368	1.28364	0.863467	0.946107	0.996506	1.08546	1.0319	0.937349	0.575509	0.829859	1.24061	0.994913	1.14191	1.24982	1.14855	1.14077	1.03738	1.05887
613	chr2	119034877	119557976	1.07176	1.15212	1.02901	0.979709	0.981474	0.887364	0.821683	1.05064	1.10054	1.12851	1.20105	1.00924	1.0023	1.02501	1.03935	0.99233	0.686602	0.972972	0.9996	0.9993	0.935008	1.01157	1.11997	1.1971	1.04081	1.16253	1.00441	1.02768	1.02368	1.28364	0.863467	0.946107	0.996506	1.08546	1.0319	0.937349	0.575509	0.829859	1.24061	0.994913	1.14191	1.24982	1.14855	1.14077	1.03738	1.05887
614	chr2	119557977	120108122	1.07176	1.15212	1.02901	0.979709	0.981474	0.887364	0.821683	1.05064	1.10054	1.12851	1.20105	1.00924	1.0023	1.02501	1.03935	0.99233	0.686602	0.972972	0.9996	0.9993	0.935008	1.01157	1.11997	1.1971	1.04081	1.16253	1.00441	1.02768	1.02368	1.28364	0.863467	0.946107	0.996506	1.08546	1.0319	0.937349	0.575509	0.829859	1.24061	0.994913	1.14191	1.24982	1.14855	1.14077	1.03738	1.05887
615	chr2	120108123	120666063	1.07176	1.15212	1.02901	0.979709	0.981474	0.887364	0.821683	1.05064	1.10054	1.12851	1.20105	1.00924	1.0023	1.02501	1.03935	0.99233	0.686602	0.972972	0.9996	0.9993	0.935008	1.01157	1.11997	1.1971	1.04081	1.16253	1.00441	1.02768	1.02368	1.28364	0.863467	0.946107	0.996506	1.08546	1.0319	0.937349	0.575509	0.829859	1.24061	0.994913	1.14191	1.24982	1.14855	1.14077	1.03738	1.05887
616	chr2	120666064	121234086	1.07176	1.15212	1.02901	0.979709	0.981474	0.887364	0.821683	1.05064	1.10054	1.12851	1.20105	1.00924	1.0023	1.02501	1.03935	0.99233	0.686602	0.972972	0.9996	0.9993	0.935008	1.01157	1.11997	1.1971	1.04081	1.16253	1.00441	1.02768	1.02368	1.28364	0.863467	0.946107	0.996506	1.08546	1.0319	0.937349	0.575509	0.829859	1.24061	0.994913	1.14191	1.24982	1.14855	1.14077	1.03738	1.05887
617	chr2	121234087	121725967	1.07176	1.15212	1.02901	0.979709	0.981474	0.887364	0.821683	1.05064	1.10054	1.12851	1.20105	1.00924	1.0023	1.02501	1.03935	0.99233	0.686602	0.972972	0.9996	0.9993	0.935008	1.01157	1.11997	1.1971	1.04081	1.16253	1.00441	1.02768	1.02368	1.28364	0.863467	0.946107	0.996506	1.08546	1.0319	0.937349	0.575509	0.829859	1.24061	0.994913	1.14191	1.24982	1.14855	1.14077	1.03738	1.05887
618	chr2	121725968	122244604	1.07176	1.15212	1.02901	0.979709	0.981474	0.887364	0.821683	1.05064	1.10054	1.12851	1.20105	1.00924	1.0023	1.02501	1.03935	0.99233	0.686602	0.972972	0.9996	0.9993	0.935008	1.01157	1.11997	1.1971	1.04081	1.16253	1.00441	1.02768	1.02368	1.28364	0.863467	0.946107	0.996506	1.08546	1.0319	0.937349	0.575509	0.829859	1.24061	0.994913	1.14191	1.24982	1.14855	1.14077	1.03738	1.05887
619	chr2	122244605	122803166	1.07176	1.15212	1.02901	0.979709	0.981474	0.887364	0.821683	1.05064	1.10054	1.12851	1.20105	1.00924	1.0023	1.02501	1.3803	0.99233	0.686602	0.972972	0.9996	0.9993	0.935008	0.688734	1.11997	1.1971	1.04081	1.16253	1.00441	1.02768	1.02368	1.28364	0.863467	0.946107	0.996506	1.08546	1.0319	0.937349	0.575509	0.829859	1.24061	0.994913	1.14191	1.24982	1.14855	1.14077	1.03738	1.05887
620	chr2	122803167	123377687	1.07176	1.15212	1.02901	0.979709	0.981474	0.887364	0.821683	1.05064	1.10054	1.12851	1.20105	1.00924	1.0023	1.02501	1.3803	0.99233	1.10021	0.972972	0.9996	0.9993	0.935008	0.688734	1.11997	1.1971	1.04081	1.16253	1.00441	1.02768	1.02368	1.28364	0.863467	0.946107	0.996506	1.08546	1.0319	0.937349	0.575509	0.829859	1.24061	0.994913	1.14191	1.24982	1.14855	1.14077	1.03738	1.05887
621	chr2	123377688	123998569	1.07176	1.15212	1.02901	0.979709	0.981474	0.887364	0.821683	1.05064	1.10054	1.12851	1.20105	1.00924	1.0023	1.02501	1.3803	0.99233	1.10021	0.972972	0.9996	0.9993	0.935008	0.688734	1.11997	1.1971	1.04081	1.16253	1.00441	1.02768	1.02368	1.28364	0.863467	0.946107	0.996506	1.08546	1.0319	0.937349	0.575509	0.829859	1.24061	0.994913	1.14191	1.24982	1.14855	1.14077	1.03738	1.05887
622	chr2	123998570	124645714	1.07176	1.15212	1.02901	0.979709	0.981474	1.08687	0.821683	1.05064	1.10054	1.12851	1.20105	1.00924	1.0023	1.02501	1.3803	0.99233	1.10021	0.972972	0.9996	0.9993	0.935008	0.688734	1.11997	1.1971	1.04081	1.16253	1.00441	1.02768	1.02368	1.28364	0.863467	0.946107	0.996506	1.08546	1.0319	0.937349	0.575509	0.829859	1.24061	0.994913	1.14191	1.24982	1.14855	1.14077	1.03738	1.05887
623	chr2	124645715	125282154	1.07176	1.15212	1.02901	0.979709	0.981474	1.08687	0.821683	1.05064	1.10054	1.12851	1.20105	1.00924	1.0023	1.02501	1.3803	0.99233	1.10021	1.16498	0.9996	0.9993	0.935008	0.688734	1.11997	1.1971	1.04081	1.16253	1.00441	1.02768	1.02368	1.28364	0.863467	0.946107	0.996506	1.08546	1.0319	0.937349	0.575509	0.829859	1.24061	0.994913	1.14191	1.24982	1.14855	1.14077	1.03738	0.555437
624	chr2	125282155	125898381	1.07176	1.15212	1.02901	0.979709	0.981474	1.08687	0.821683	1.05064	1.10054	1.12851	1.20105	1.00924	1.0023	1.02501	1.3803	0.99233	0.555437	1.16498	0.9996	0.9993	0.935008	0.688734	1.11997	1.1971	1.04081	1.16253	1.00441	1.02768	1.02368	1.28364	0.863467	0.946107	0.996506	1.08546	1.0319	0.937349	0.575509	0.829859	1.24061	0.994913	1.14191	1.24982	1.14855	1.14077	1.03738	0.555437
625	chr2	125898382	126549317	1.07176	1.15212	1.02901	0.979709	0.981474	1.08687	0.821683	1.05064	1.10054	1.12851	1.20105	1.00924	1.0023	1.02501	1.3803	0.99233	0.555437	1.16498	0.9996	0.9993	0.935008	0.688734	1.11997	1.1971	1.04081	1.16253	1.00441	1.02768	1.02368	1.28364	0.863467	0.946107	0.996506	1.08546	1.0319	0.937349	0.575509	0.829859	1.24061	0.994913	1.14191	1.24982	1.14855	1.14077	1.03738	0.555437
626	chr2	126549318	127182281	1.07176	1.15212	1.02901	0.979709	0.981474	1.08687	0.821683	1.05064	1.10054	1.12851	1.20105	1.00924	1.0023	1.02501	1.3803	0.99233	0.555437	1.16498	0.9996	0.9993	0.935008	0.688734	1.11997	1.1971	1.04081	1.16253	1.00441	1.02768	1.02368	1.28364	0.863467	0.946107	0.996506	1.08546	1.0319	0.937349	0.575509	0.829859	1.24061	0.994913	1.14191	1.24982	1.14855	1.14077	1.03738	0.555437
627	chr2	127182282	127719097	1.07176	1.15212	1.02901	0.979709	0.981474	1.08687	0.821683	1.05064	1.10054	1.12851	1.20105	1.00924	1.0023	1.02501	1.3803	0.99233	0.555437	1.16498	0.9996	0.9993	0.935008	1.00391	1.11997	1.1971	1.04081	1.16253	1.00441	1.02768	1.02368	1.28364	0.863467	0.946107	0.996506	1.08546	1.0319	0.937349	0.575509	0.829859	1.24061	0.994913	1.14191	1.24982	1.14855	1.14077	1.03738	0.555437
628	chr2	127719098	128248568	1.07176	1.15212	1.02901	0.979709	0.981474	1.08687	0.821683	1.05064	1.10054	1.12851	1.20105	1.00924	1.0023	1.02501	1.3803	0.99233	0.555437	1.16498	0.9996	0.9993	0.935008	1.00391	1.11997	1.1971	1.04081	1.16253	1.00441	1.02768	1.02368	1.28364	0.863467	0.946107	0.996506	1.08546	1.0319	0.937349	0.575509	0.829859	1.24061	0.994913	1.14191	1.24982	1.14855	1.14077	1.03738	0.555437
629	chr2	128248569	128804307	1.07176	1.15212	1.02901	0.979709	0.981474	1.08687	0.821683	1.05064	1.10054	1.12851	1.20105	1.00924	1.0023	1.02501	1.3803	0.99233	0.555437	1.16498	0.9996	0.9993	0.935008	1.00391	1.11997	1.1971	1.04081	1.16253	1.00441	1.02768	1.02368	1.28364	0.863467	0.946107	0.996506	1.08546	1.0319	0.937349	0.575509	0.829859	1.24061	0.994913	1.14191	1.24982	1.14855	1.14077	1.03738	0.918512
630	chr2	128804308	129334972	1.07176	1.15212	1.02901	0.979709	0.981474	1.08687	0.821683	1.05064	1.10054	1.12851	1.20105	1.00924	1.0023	1.02501	1.3803	0.99233	0.555437	1.16498	0.9996	0.9993	0.935008	1.00391	1.11997	1.1971	1.04081	1.16253	1.00441	1.02768	1.02368	1.28364	0.863467	0.946107	0.996506	1.08546	1.0319	0.937349	0.575509	0.829859	1.24061	0.994913	1.14191	1.24982	1.14855	1.14077	1.03738	0.918512
631	chr2	129334973	129893529	1.07176	1.15212	1.02901	0.979709	0.981474	1.08687	0.821683	1.05064	1.10054	1.12851	1.20105	1.00924	1.0023	1.02501	1.3803	0.99233	0.555437	1.16498	0.9996	0.9993	0.935008	1.00391	1.11997	1.1971	1.04081	1.16253	1.00441	1.02768	1.02368	1.28364	0.863467	0.946107	0.996506	1.08546	1.0319	0.937349	0.575509	0.829859	1.24061	0.994913	1.14191	1.24982	1.14855	1.14077	1.03738	0.918512
632	chr2	129893530	130489798	1.07176	1.15212	1.02901	0.979709	0.981474	1.08687	0.821683	1.05064	1.10054	1.12851	1.20105	1.00924	1.0023	1.02501	1.3803	0.99233	0.555437	1.16498	0.9996	0.9993	0.935008	1.00391	1.11997	1.1971	1.04081	1.16253	1.00441	1.02768	1.02368	1.28364	0.863467	0.946107	0.996506	1.08546	1.0319	0.937349	0.575509	0.829859	1.24061	0.994913	1.14191	1.24982	1.14855	1.14077	1.03738	0.918512
633	chr2	130489799	131034968	1.07176	1.15212	1.02901	0.979709	0.981474	1.08687	0.821683	1.05064	1.10054	1.12851	1.20105	1.00924	1.0023	1.02501	1.3803	0.99233	0.555437	1.16498	0.9996	0.9993	0.935008	1.00391	1.11997	1.1971	1.04081	1.16253	1.00441	1.02768	1.02368	1.28364	0.863467	0.946107	0.996506	1.08546	1.0319	0.937349	0.575509	0.829859	1.24061	0.994913	1.14191	1.06024	1.14855	1.14077	1.03738	0.918512
634	chr2	131034969	131489969	1.07176	1.15212	1.02901	0.979709	0.981474	1.08687	0.821683	1.05064	1.10054	1.12851	1.20105	1.00924	1.0023	1.02501	1.3803	0.99233	0.555437	1.16498	0.9996	0.9993	0.935008	1.00391	1.11997	1.1971	1.04081	1.16253	1.00441	1.02768	1.02368	1.28364	0.863467	0.946107	0.996506	1.08546	1.0319	0.937349	0.575509	0.829859	1.24061	0.994913	1.14191	1.06024	1.14855	1.14077	1.03738	0.918512
635	chr2	131489970	132045389	1.07176	1.15212	1.02901	0.979709	0.981474	1.08687	0.821683	1.05064	1.10054	1.12851	1.20105	1.00924	1.0023	1.02501	1.03634	0.99233	0.555437	1.16498	0.9996	0.9993	0.935008	1.00391	1.11997	1.1971	1.04081	1.16253	1.00441	1.02768	1.02368	1.28364	0.863467	0.946107	0.996506	1.08546	1.0319	0.937349	0.575509	0.829859	1.24061	0.994913	1.14191	1.06024	1.14855	1.14077	1.03738	0.918512
636	chr2	132045390	132624565	1.07176	1.15212	1.02901	0.979709	0.981474	1.08687	0.821683	1.05064	1.10054	1.12851	1.20105	1.00924	1.0023	1.02501	1.03634	0.99233	0.555437	1.16498	0.9996	0.9993	0.935008	1.00391	1.11997	1.1971	1.04081	1.16253	1.00441	1.02768	1.02368	1.28364	0.863467	0.946107	0.996506	1.08546	1.0319	0.937349	0.575509	0.829859	1.24061	0.994913	1.14191	1.06024	1.14855	1.14077	1.03738	0.918512
637	chr2	132624566	133106652	1.07176	1.15212	1.02901	0.979709	0.981474	1.08687	0.821683	1.05064	1.10054	1.12851	1.20105	1.00924	1.0023	1.02501	1.03634	0.99233	0.555437	1.16498	0.9996	0.9993	0.935008	1.00391	1.11997	1.1971	1.04081	1.16253	1.00441	1.02768	1.02368	1.28364	0.990446	0.946107	0.996506	1.08546	1.0319	0.937349	0.575509	0.829859	1.24061	0.994913	1.14191	1.06024	1.14855	1.14077	1.03738	0.918512
638	chr2	133106653	133646729	1.07176	1.15212	1.02901	0.979709	0.981474	1.08687	0.821683	1.05064	1.10054	1.12851	1.20105	1.00924	1.0023	1.02501	1.03634	0.99233	0.555437	1.16498	0.9996	0.9993	0.935008	1.00391	1.11997	1.1971	1.04081	1.16253	1.00441	1.02768	1.02368	1.28364	0.990446	0.946107	0.996506	1.08546	1.0319	0.937349	0.575509	0.829859	1.24061	0.994913	1.14191	1.06024	1.14855	1.14077	1.03738	1.19889
639	chr2	133646730	134222441	1.07176	1.15212	1.02901	0.979709	0.981474	1.08687	0.821683	1.05064	1.10054	1.12851	1.20105	1.00924	1.0023	1.02501	1.03634	0.99233	0.555437	1.16498	0.9996	0.9993	0.935008	1.00391	1.11997	1.1971	1.04081	1.16253	1.00441	1.02768	1.02368	1.28364	0.990446	0.946107	0.996506	1.08546	1.0319	0.937349	0.575509	0.829859	1.24061	0.994913	1.14191	1.06024	1.14855	1.14077	1.03738	1.19889
640	chr2	134222442	134764646	1.07176	1.15212	1.02901	0.979709	0.981474	1.08687	0.821683	1.05064	1.10054	1.12851	1.20105	1.00924	1.0023	1.02501	1.03634	0.99233	0.555437	1.16498	0.9996	0.9993	0.935008	1.00391	1.11997	1.1971	1.04081	1.16253	1.00441	1.02768	1.02368	1.28364	0.990446	0.946107	0.996506	1.08546	1.0319	0.937349	0.575509	0.829859	1.24061	0.994913	1.14191	1.06024	1.14855	1.14077	1.03738	1.19889
641	chr2	134764647	135304965	1.07176	1.15212	1.02901	0.979709	0.981474	0.845269	0.821683	1.05064	1.10054	1.12851	1.20105	1.00924	1.0023	1.02501	1.03634	0.99233	0.555437	1.16498	0.9996	0.9993	0.935008	1.00391	1.11997	1.1971	1.04081	1.16253	1.00441	1.02768	1.02368	1.28364	0.990446	0.946107	0.996506	1.08546	1.0319	0.937349	0.575509	0.829859	1.24061	0.994913	1.14191	1.06024	1.14855	1.14077	1.03738	1.19889
642	chr2	135304966	135899815	1.07176	1.15212	1.02901	0.979709	0.981474	0.845269	0.821683	1.05064	1.10054	1.12851	1.20105	1.00924	1.0023	1.02501	1.03634	0.99233	0.555437	1.16498	0.9996	0.9993	0.935008	1.00391	1.11997	1.1971	1.04081	1.16253	1.00441	1.02768	1.02368	1.28364	0.990446	0.946107	0.996506	1.08546	1.0319	0.937349	0.575509	0.829859	1.24061	0.994913	1.14191	1.06024	1.14855	1.14077	1.03738	1.19889
643	chr2	135899816	136522587	1.07176	1.15212	1.02901	0.979709	0.981474	0.845269	0.821683	1.05064	1.10054	1.12851	1.20105	1.00924	1.0023	1.02501	1.03634	0.99233	0.555437	1.16498	0.9996	0.9993	0.935008	1.00391	1.11997	1.1971	1.04081	1.16253	1.00441	1.02768	1.02368	1.28364	0.990446	0.946107	0.996506	1.08546	1.0319	0.937349	0.575509	0.829859	1.24061	0.994913	1.14191	1.06024	1.14855	1.14077	1.03738	1.19889
644	chr2	136522588	137080316	1.07176	1.15212	1.02901	0.979709	0.981474	0.845269	0.821683	1.05064	0.930903	1.12851	1.20105	1.00924	1.0023	1.02501	1.03634	0.99233	0.555437	1.16498	0.9996	0.9993	0.935008	1.00391	1.11997	1.1971	1.04081	1.16253	1.00441	1.02768	1.02368	1.28364	0.990446	0.946107	0.996506	1.08546	1.0319	0.937349	0.575509	0.829859	1.24061	0.994913	1.14191	1.06024	1.14855	1.14077	1.03738	1.19889
645	chr2	137080317	137659284	1.07176	1.15212	1.02901	0.979709	0.981474	0.845269	0.821683	1.05064	0.930903	1.12851	1.20105	1.00924	1.0023	1.02501	1.03634	0.99233	0.555437	1.16498	0.9996	0.9993	0.935008	1.00391	1.11997	1.1971	1.04081	1.16253	1.00441	1.02768	1.02368	1.28364	0.990446	0.946107	0.996506	1.08546	1.0319	0.937349	0.575509	0.829859	1.24061	0.994913	1.14191	1.06024	1.14855	1.14077	1.03738	1.19889
646	chr2	137659285	138290205	1.07176	1.15212	1.02901	0.979709	0.981474	0.845269	0.821683	1.05064	0.930903	1.12851	1.20105	1.00924	1.0023	1.02501	1.03634	0.99233	0.555437	1.16498	0.9996	0.9993	0.935008	1.00391	1.11997	1.1971	1.04081	1.16253	1.00441	1.02768	1.02368	1.28364	0.990446	0.946107	0.996506	1.08546	1.0319	0.937349	0.575509	0.829859	1.24061	0.994913	1.14191	1.06024	1.14855	1.14077	1.03738	1.19889
647	chr2	138290206	138899521	1.07176	1.15212	1.02901	0.979709	0.981474	0.845269	0.821683	1.05064	0.930903	1.12851	1.20105	1.00924	1.0023	1.02501	1.03634	0.99233	0.555437	1.16498	0.9996	0.9993	0.935008	1.00391	1.11997	1.1971	1.04081	1.16253	1.00441	1.02768	1.02368	1.28364	0.990446	0.946107	0.996506	1.08546	1.0319	0.937349	0.575509	0.829859	1.24061	0.994913	1.14191	1.06024	1.14855	1.14077	1.03738	1.19889
648	chr2	138899522	139500158	1.07176	1.15212	1.02901	0.979709	0.981474	0.845269	0.821683	1.05064	0.930903	1.12851	1.20105	1.00924	1.0023	1.02501	1.03634	0.99233	0.555437	1.16498	0.9996	0.9993	0.935008	1.00391	1.11997	1.1971	1.04081	1.16253	1.00441	1.02768	1.02368	1.28364	0.990446	0.946107	0.996506	1.08546	1.0319	0.937349	0.575509	0.829859	1.24061	0.994913	1.14191	1.06024	0.970057	1.14077	1.03738	1.19889
649	chr2	139500159	140135867	1.07176	1.15212	1.02901	0.979709	0.981474	0.845269	0.821683	1.05064	0.930903	1.12851	1.20105	1.00924	1.0023	1.02501	1.03634	0.99233	0.555437	1.16498	0.9996	0.9993	0.935008	1.00391	1.11997	1.1971	1.04081	1.16253	1.00441	1.02768	1.02368	1.28364	0.990446	0.946107	0.996506	1.08546	1.0319	0.937349	0.575509	0.829859	1.24061	0.994913	1.14191	1.06024	0.970057	1.14077	1.03738	1.19889
650	chr2	140135868	140785949	1.07176	1.15212	1.02901	0.979709	0.981474	0.845269	0.821683	1.05064	0.930903	1.12851	1.20105	1.00924	1.0023	1.02501	1.03634	0.99233	0.555437	1.16498	0.9996	0.9993	0.935008	1.00391	1.11997	1.1971	1.04081	1.16253	1.00441	1.02768	1.02368	1.28364	0.990446	0.946107	0.996506	1.08546	1.0319	0.937349	0.575509	0.829859	1.24061	0.994913	1.14191	1.06024	0.970057	1.14077	1.03738	1.19889
651	chr2	140785950	141440323	1.07176	1.15212	1.02901	0.979709	0.981474	0.845269	0.821683	1.05064	0.930903	1.12851	1.20105	1.00924	1.0023	1.02501	1.03634	0.99233	0.555437	1.16498	0.9996	0.9993	0.935008	1.00391	1.11997	1.1971	1.04081	1.16253	1.00441	1.02768	1.02368	1.28364	0.990446	0.946107	0.996506	1.08546	1.0319	0.937349	0.575509	0.829859	1.24061	0.994913	1.14191	1.06024	0.970057	1.14077	1.03738	1.19889
652	chr2	141440324	142108722	1.07176	1.15212	1.02901	0.979709	0.981474	0.845269	0.821683	1.05064	0.930903	1.12851	1.20105	1.00924	1.0023	1.02501	1.03634	0.99233	0.555437	1.16498	0.9996	0.9993	0.935008	1.00391	1.11997	1.1971	1.04081	1.16253	1.00441	1.02768	1.02368	1.28364	0.990446	0.946107	0.996506	1.08546	1.0319	0.937349	0.575509	0.829859	1.24061	0.994913	1.14191	1.06024	0.970057	1.14077	1.03738	1.19889
653	chr2	142108723	142764688	1.07176	1.15212	1.02901	0.979709	0.981474	0.845269	0.821683	1.05064	0.930903	1.12851	1.20105	1.00924	1.0023	1.02501	1.03634	0.99233	0.555437	1.16498	0.9996	0.9993	0.935008	1.00391	1.11997	1.1971	1.04081	1.16253	1.00441	1.02768	1.02368	1.28364	0.990446	0.946107	0.996506	1.08546	1.0319	0.937349	0.575509	0.829859	1.24061	0.994913	1.14191	1.06024	0.970057	1.14077	1.03738	1.19889
654	chr2	142764689	143423926	1.07176	1.15212	1.02901	0.979709	0.981474	0.845269	0.821683	1.05064	0.930903	1.12851	1.20105	1.00924	1.0023	1.02501	1.03634	0.99233	0.555437	1.16498	0.9996	0.9993	0.935008	1.00391	1.11997	1.1971	1.04081	1.16253	1.00441	1.02768	1.02368	1.28364	0.990446	0.946107	0.996506	1.08546	1.0319	0.937349	0.575509	0.829859	1.24061	0.994913	1.14191	1.06024	0.970057	1.14077	1.03738	0.904114
655	chr2	143423927	144043797	1.07176	1.15212	1.21034	0.979709	0.981474	0.845269	0.821683	1.05064	0.930903	1.12851	1.20105	1.00924	1.0023	1.02501	1.03634	0.99233	0.555437	1.16498	0.9996	0.9993	0.935008	1.00391	1.11997	1.1971	1.04081	1.16253	1.00441	1.02768	1.02368	1.09834	0.990446	0.946107	0.996506	1.08546	1.0319	0.937349	0.575509	0.829859	1.24061	0.994913	1.14191	1.06024	0.970057	1.14077	1.03738	0.904114
656	chr2	144043798	144599655	1.07176	1.15212	1.21034	0.979709	0.981474	0.845269	1.09297	1.05064	0.930903	1.12851	1.20105	1.00924	1.0023	1.02501	1.03634	0.99233	0.904476	1.16498	0.9996	0.9993	0.935008	1.00391	1.11997	1.1971	1.04081	1.16253	1.00441	1.02768	1.02368	1.09834	0.990446	0.946107	0.996506	1.08546	1.0319	0.937349	0.575509	0.829859	1.24061	0.994913	1.14191	1.06024	0.970057	1.14077	1.03738	0.904114
657	chr2	144599656	145185520	1.07176	1.15212	1.21034	0.979709	0.981474	0.845269	1.09297	1.05064	0.930903	1.12851	1.20105	1.00924	1.0023	1.02501	1.03634	0.99233	0.904476	1.16498	0.9996	0.9993	0.935008	1.00391	1.11997	1.1971	1.04081	1.16253	1.00441	1.02768	1.02368	1.09834	0.990446	0.946107	0.996506	1.08546	1.0319	0.937349	0.575509	0.829859	1.24061	0.994913	1.14191	1.06024	0.970057	1.14077	1.03738	0.904114
658	chr2	145185521	145739007	1.07176	1.15212	1.21034	0.979709	0.981474	0.845269	1.09297	1.05064	0.930903	1.12851	1.20105	1.00924	1.0023	1.02501	1.03634	0.99233	0.904476	1.16498	0.9996	0.9993	0.935008	1.00391	1.11997	1.1971	1.04081	1.16253	1.00441	1.02768	1.02368	1.09834	0.990446	0.946107	0.996506	1.08546	1.0319	0.937349	0.575509	0.829859	1.24061	0.994913	1.14191	1.06024	0.970057	1.14077	1.03738	0.904114
659	chr2	145739008	146313042	1.07176	1.15212	1.21034	0.979709	0.981474	0.845269	1.09297	1.05064	0.930903	1.12851	1.20105	1.00924	1.0023	1.02501	1.03634	0.99233	0.904476	1.16498	0.9996	0.9993	0.935008	1.00391	1.11997	1.1971	1.04081	1.16253	1.00441	1.02768	1.02368	1.09834	0.990446	0.946107	0.996506	1.08546	1.0319	0.937349	0.575509	0.829859	1.24061	0.994913	1.14191	1.06024	0.970057	1.14077	1.03738	0.904114
660	chr2	146313043	146935779	1.07176	1.15212	1.21034	0.979709	0.981474	0.845269	1.09297	1.05064	0.930903	1.12851	1.20105	1.00924	1.0023	1.02501	1.03634	0.99233	0.904476	1.16498	0.9996	0.9993	0.935008	1.00391	1.11997	1.1971	1.04081	1.16253	1.00441	1.02768	1.02368	1.09834	0.990446	0.946107	0.996506	1.08546	1.0319	0.937349	0.575509	0.829859	1.24061	0.994913	1.14191	1.06024	0.970057	1.14077	1.03738	0.904114
661	chr2	146935780	147576202	1.07176	1.15212	1.21034	0.979709	0.981474	0.845269	1.09297	1.05064	0.930903	1.12851	1.20105	1.00924	1.0023	1.02501	1.03634	0.99233	0.904476	1.16498	0.9996	0.9993	0.935008	1.00391	1.11997	1.1971	1.04081	1.16253	1.00441	1.02768	1.02368	1.09834	0.990446	0.946107	0.996506	1.08546	1.0319	0.937349	0.575509	0.829859	1.24061	0.994913	1.14191	1.41383	0.970057	1.14077	1.03738	0.904114
662	chr2	147576203	148177701	1.07176	1.15212	1.21034	0.979709	0.981474	0.845269	1.09297	1.05064	0.930903	1.12851	1.20105	1.00924	1.0023	1.02501	1.03634	0.99233	0.904476	1.16498	0.9996	0.9993	0.935008	1.00391	1.11997	1.1971	1.04081	1.16253	1.00441	1.02768	1.02368	1.09834	0.990446	0.946107	0.996506	1.08546	1.0319	0.937349	0.575509	0.829859	1.24061	0.994913	1.14191	1.41383	0.970057	1.14077	1.03738	0.904114
663	chr2	148177702	148767873	1.07176	1.15212	1.21034	0.979709	0.981474	0.845269	1.09297	1.05064	0.930903	1.12851	1.20105	1.00924	1.0023	1.02501	1.03634	0.99233	0.904476	1.16498	0.9996	0.9993	0.935008	1.00391	1.11997	1.1971	1.04081	1.16253	1.00441	1.02768	1.02368	1.09834	0.990446	0.946107	0.996506	1.08546	1.0319	0.937349	0.575509	0.829859	1.24061	0.994913	1.14191	1.41383	0.970057	1.14077	1.03738	0.904114
664	chr2	148767874	149395999	1.07176	1.15212	1.21034	0.979709	0.981474	0.845269	1.09297	1.05064	0.930903	0.617609	1.20105	1.00924	1.0023	0.526397	1.03634	0.99233	0.904476	1.16498	0.9996	0.9993	0.935008	1.00391	1.11997	1.1971	1.04081	1.16253	1.00441	1.02768	1.02368	1.09834	0.990446	0.946107	0.996506	1.08546	1.0319	0.937349	0.575509	0.829859	1.24061	0.994913	1.14191	1.41383	0.970057	1.14077	1.03738	0.904114
665	chr2	149396000	150051142	1.07176	1.15212	1.21034	0.979709	0.981474	0.449779	1.09297	0.629959	0.930903	0.617609	1.20105	1.00924	1.0023	0.526397	1.03634	0.99233	0.904476	1.16498	0.9996	0.9993	0.935008	1.00391	1.11997	1.1971	1.04081	1.16253	1.00441	1.02768	1.02368	1.09834	0.566431	0.946107	0.996506	0.952848	1.0319	0.484325	0.575509	0.829859	1.24061	0.994913	1.14191	1.41383	0.970057	1.14077	1.03738	0.904114
666	chr2	150051143	150624089	1.07176	1.15212	1.21034	0.979709	0.981474	0.449779	1.09297	0.629959	0.930903	0.617609	1.20105	1.00924	1.0023	0.526397	1.03634	0.99233	0.904476	1.16498	0.9996	0.9993	0.935008	1.00391	1.11997	1.1971	1.04081	1.16253	1.00441	1.02768	1.02368	1.09834	0.566431	0.946107	0.996506	0.952848	1.0319	0.484325	0.575509	0.829859	1.24061	0.994913	1.14191	1.41383	0.970057	1.14077	1.03738	0.904114
667	chr2	150624090	151226361	1.07176	1.15212	1.21034	0.979709	0.981474	0.449779	1.09297	0.629959	0.930903	0.617609	1.20105	1.00924	1.0023	0.526397	1.03634	0.99233	0.904476	1.16498	0.9996	0.9993	0.935008	1.00391	1.11997	1.1971	1.04081	1.16253	1.00441	1.02768	1.02368	1.09834	0.566431	0.946107	0.996506	0.952848	1.0319	0.484325	0.575509	0.829859	1.24061	0.994913	1.14191	1.41383	0.970057	1.14077	1.03738	0.904114
668	chr2	151226362	151773493	1.07176	1.15212	1.21034	0.979709	0.981474	0.449779	1.09297	0.629959	0.930903	0.617609	1.20105	1.00924	1.0023	0.526397	1.03634	0.99233	0.904476	1.16498	0.9996	0.9993	0.935008	1.00391	1.11997	1.1971	1.04081	1.16253	1.00441	1.02768	1.02368	1.09834	0.566431	0.946107	0.996506	0.952848	1.0319	0.484325	0.575509	0.829859	1.24061	0.994913	1.14191	1.41383	0.970057	1.14077	1.03738	0.904114
669	chr2	151773494	152351712	1.07176	1.15212	1.21034	0.979709	0.981474	0.449779	1.09297	0.629959	0.930903	0.617609	1.20105	1.00924	1.0023	0.526397	1.03634	0.99233	0.904476	1.16498	0.9996	0.9993	0.935008	1.00391	1.11997	1.1971	1.04081	1.16253	1.00441	1.02768	1.02368	1.09834	0.566431	0.946107	0.996506	0.952848	1.0319	0.484325	0.575509	0.829859	1.24061	0.994913	1.14191	1.41383	0.970057	1.14077	1.03738	0.904114
670	chr2	152351713	152904898	1.07176	1.15212	1.21034	0.979709	0.981474	0.449779	1.09297	0.629959	0.930903	0.617609	1.20105	1.00924	1.0023	0.526397	1.03634	0.99233	0.904476	1.16498	0.9996	0.9993	0.935008	1.00391	1.11997	1.1971	1.04081	1.16253	1.00441	1.02768	1.02368	1.09834	0.566431	0.946107	0.996506	0.952848	1.0319	0.484325	0.575509	0.829859	1.24061	0.994913	1.14191	1.41383	0.970057	1.14077	1.03738	0.904114
671	chr2	152904899	153459618	1.07176	1.15212	1.21034	0.979709	0.981474	0.449779	1.09297	0.629959	0.930903	0.617609	1.20105	1.00924	1.0023	0.526397	1.03634	0.99233	0.904476	1.16498	0.9996	0.9993	0.935008	1.00391	1.11997	1.1971	1.04081	1.16253	1.00441	1.02768	1.02368	1.09834	0.566431	0.946107	0.996506	0.952848	1.0319	0.484325	0.575509	0.829859	1.24061	0.994913	1.14191	1.41383	0.970057	1.14077	1.03738	0.904114
672	chr2	153459619	154054749	1.07176	1.15212	1.21034	0.979709	0.981474	0.449779	1.09297	0.629959	0.930903	0.617609	1.20105	1.00924	1.0023	0.526397	1.03634	0.99233	0.904476	1.16498	0.9996	0.9993	0.935008	1.00391	1.11997	1.1971	1.04081	1.16253	1.00441	1.02768	1.02368	1.09834	0.566431	0.946107	0.996506	0.952848	1.0319	0.484325	0.575509	0.829859	1.24061	0.994913	1.14191	1.41383	0.970057	1.14077	1.03738	0.904114
673	chr2	154054750	154696884	1.07176	1.15212	1.21034	0.979709	0.981474	0.449779	1.09297	0.629959	0.930903	0.617609	1.20105	1.00924	1.0023	0.526397	1.03634	0.99233	1.21361	1.16498	0.9996	0.9993	0.935008	1.00391	1.11997	1.1971	1.04081	1.16253	1.00441	1.02768	1.02368	1.09834	0.566431	0.946107	0.996506	0.952848	1.0319	0.484325	0.575509	0.829859	1.24061	0.994913	1.14191	1.41383	0.970057	1.14077	1.03738	0.904114
674	chr2	154696885	155350732	1.07176	1.15212	1.21034	0.979709	0.981474	0.449779	1.09297	0.629959	0.930903	0.617609	1.20105	1.00924	1.0023	0.526397	1.03634	0.99233	1.21361	1.16498	0.9996	0.9993	0.935008	1.00391	1.11997	1.1971	1.04081	1.16253	1.00441	1.02768	1.02368	1.09834	0.566431	0.946107	0.996506	1.07219	1.0319	0.484325	0.575509	0.829859	1.24061	0.994913	1.14191	1.41383	0.970057	1.14077	1.03738	0.904114
675	chr2	155350733	156010048	1.07176	1.15212	1.21034	0.979709	0.981474	0.449779	1.09297	0.629959	0.930903	0.617609	1.20105	1.00924	1.0023	0.526397	1.03634	0.99233	1.21361	1.16498	0.9996	0.9993	0.935008	1.00391	1.11997	1.1971	1.04081	1.16253	1.00441	1.02768	1.02368	1.09834	0.566431	0.946107	0.996506	1.07219	1.0319	0.484325	0.575509	0.829859	1.24061	0.994913	1.14191	1.41383	0.970057	1.14077	1.03738	0.904114
676	chr2	156010049	156677526	1.07176	1.15212	1.21034	0.979709	0.981474	0.449779	1.09297	0.629959	0.930903	0.617609	1.20105	1.00924	1.0023	0.526397	1.03634	0.99233	1.21361	1.16498	0.9996	0.9993	0.935008	1.00391	1.11997	1.1971	1.04081	1.16253	1.00441	1.02768	1.02368	1.09834	0.566431	0.946107	0.996506	1.07219	1.0319	0.484325	0.575509	0.829859	1.24061	0.994913	1.14191	1.41383	0.970057	1.00341	1.03738	0.904114
677	chr2	156677527	157291932	1.07176	1.15212	1.21034	0.979709	0.981474	0.816768	1.09297	0.629959	0.930903	0.814566	1.20105	1.00924	1.0023	0.526397	1.03634	0.99233	1.21361	1.16498	0.9996	0.9993	0.935008	1.00391	1.11997	1.1971	1.04081	1.16253	1.00441	1.02768	1.02368	1.09834	0.566431	0.946107	0.996506	1.07219	1.0319	0.484325	0.575509	0.829859	1.24061	0.994913	1.14191	1.41383	0.970057	1.00341	1.03738	0.904114
678	chr2	157291933	157906405	1.07176	1.15212	1.21034	0.979709	0.981474	0.816768	1.09297	1.01177	0.930903	0.814566	1.20105	1.00924	1.0023	1.01552	1.03634	0.99233	1.21361	1.16498	0.9996	0.9993	0.935008	1.00391	1.11997	1.1971	1.04081	1.16253	1.00441	1.02768	1.02368	1.09834	1.12199	0.946107	0.996506	1.07219	1.0319	0.920811	0.575509	0.829859	1.24061	0.994913	1.14191	1.41383	0.970057	1.00341	1.03738	0.904114
679	chr2	157906406	158508422	1.07176	1.15212	1.21034	0.979709	0.981474	0.816768	1.09297	1.01177	0.930903	0.814566	1.20105	1.00924	1.0023	1.01552	1.03634	0.99233	1.21361	1.16498	0.9996	0.9993	0.935008	1.00391	1.11997	1.1971	1.04081	1.16253	1.00441	1.02768	0.926446	1.09834	1.12199	0.946107	0.996506	1.07219	1.0319	0.920811	0.575509	0.829859	1.24061	0.994913	1.14191	1.41383	0.970057	1.00341	1.03738	0.904114
680	chr2	158508423	159062860	1.07176	1.15212	1.21034	0.979709	0.981474	0.816768	1.09297	1.01177	0.930903	0.814566	1.20105	1.00924	1.0023	1.01552	1.03634	0.99233	1.21361	1.16498	0.9996	0.9993	0.935008	1.00391	1.11997	1.1971	1.04081	1.16253	1.00441	1.02768	0.926446	1.09834	1.12199	0.946107	0.996506	1.07219	1.0319	0.920811	0.575509	0.829859	1.24061	0.994913	1.14191	1.41383	0.970057	1.00341	1.03738	1.14339
681	chr2	159062861	159642040	1.07176	1.15212	1.21034	0.979709	0.981474	0.816768	1.09297	1.01177	0.930903	0.814566	1.20105	1.00924	1.0023	1.01552	1.03634	0.99233	1.21361	1.16498	0.9996	0.9993	0.935008	1.00391	1.11997	1.1971	1.04081	1.16253	1.00441	1.02768	0.926446	1.09834	1.12199	0.946107	0.996506	1.07219	1.0319	0.920811	0.575509	0.829859	1.24061	0.994913	1.14191	1.11282	0.970057	1.00341	1.03738	1.14339
682	chr2	159642041	160199310	1.07176	1.15212	0.981474	0.979709	0.981474	0.816768	1.09297	1.01177	0.930903	0.814566	1.20105	1.00924	1.0023	1.01552	1.03634	0.99233	1.21361	1.16498	0.9996	0.9993	0.935008	1.00391	1.11997	1.1971	1.04081	1.16253	1.00441	1.02768	0.926446	1.09834	1.12199	0.946107	0.996506	1.07219	1.0319	0.920811	0.575509	0.829859	1.24061	0.994913	1.14191	1.11282	0.970057	1.00341	1.03738	1.14339
683	chr2	160199311	160824850	1.07176	1.15212	0.981474	0.979709	0.981474	0.816768	1.09297	1.01177	0.930903	0.814566	1.20105	1.00924	1.0023	1.01552	1.03634	0.99233	1.21361	1.16498	0.9996	0.9993	0.935008	1.00391	1.11997	1.1971	1.04081	1.16253	1.00441	1.02768	0.926446	1.09834	1.12199	0.946107	0.996506	1.07219	1.0319	0.920811	0.575509	0.829859	1.24061	0.994913	1.14191	1.11282	0.970057	1.00341	1.03738	1.14339
684	chr2	160824851	161369693	1.07176	1.15212	0.981474	0.979709	0.981474	0.816768	1.09297	1.01177	0.930903	0.814566	1.20105	1.00924	1.0023	1.01552	1.03634	0.99233	1.21361	1.16498	0.9996	0.9993	0.935008	1.00391	1.11997	1.1971	1.04081	1.16253	1.00441	1.02768	0.926446	1.09834	1.12199	0.946107	0.996506	1.07219	1.0319	0.920811	0.575509	0.829859	1.24061	0.994913	1.14191	1.11282	0.970057	1.00341	1.03738	1.14339
685	chr2	161369694	161948721	1.07176	1.15212	0.981474	0.979709	0.981474	0.816768	1.09297	1.01177	0.930903	0.814566	1.20105	1.00924	1.0023	1.01552	0.69684	0.99233	1.21361	1.16498	0.9996	0.9993	0.935008	1.00391	1.11997	1.1971	1.04081	1.16253	1.00441	1.02768	0.926446	1.09834	1.12199	0.946107	0.996506	1.07219	1.0319	0.920811	0.575509	0.829859	1.24061	0.994913	1.14191	1.11282	0.970057	1.00341	1.03738	1.14339
686	chr2	161948722	162533747	1.07176	1.15212	0.981474	0.979709	0.981474	0.816768	1.09297	1.01177	0.930903	0.814566	1.20105	1.00924	1.0023	1.01552	0.69684	0.864763	1.21361	1.16498	0.9996	0.9993	0.935008	1.00391	1.11997	1.1971	1.04081	0.96841	1.00441	1.02768	0.926446	1.09834	0.876078	0.946107	0.996506	1.07219	1.0319	0.920811	0.575509	0.829859	1.24061	0.994913	1.14191	1.11282	0.970057	1.00341	1.03738	1.14339
687	chr2	162533748	163121885	1.07176	1.15212	0.981474	0.979709	0.981474	0.816768	1.09297	1.01177	0.930903	0.814566	1.20105	1.00924	1.0023	1.01552	0.69684	0.864763	1.21361	1.16498	0.9996	0.9993	0.935008	1.00391	1.11997	1.1971	1.04081	0.96841	1.00441	1.02768	0.926446	1.09834	0.876078	0.946107	0.996506	1.07219	1.0319	0.920811	0.575509	0.829859	1.24061	0.994913	1.14191	1.11282	0.970057	1.00341	1.03738	1.14339
688	chr2	163121886	163720133	1.07176	1.15212	0.981474	0.979709	0.981474	0.816768	1.09297	1.01177	0.930903	0.814566	1.20105	1.00924	1.0023	1.01552	0.69684	0.864763	1.21361	1.16498	0.9996	0.9993	0.935008	1.00391	1.11997	1.1971	1.04081	0.96841	1.00441	1.02768	0.926446	1.09834	0.876078	0.946107	0.996506	1.07219	1.0319	0.920811	0.575509	0.829859	1.24061	0.994913	1.14191	1.11282	0.970057	1.00341	1.03738	1.14339
689	chr2	163720134	164318683	1.07176	1.15212	0.981474	0.979709	0.981474	0.816768	1.09297	1.01177	0.930903	0.814566	1.20105	1.00924	1.0023	1.01552	0.69684	0.864763	1.21361	1.16498	0.9996	0.9993	0.935008	1.00391	1.11997	1.1971	1.04081	0.96841	1.00441	1.02768	0.926446	1.09834	0.876078	0.946107	0.996506	1.07219	1.0319	0.920811	0.575509	0.829859	1.24061	0.994913	1.14191	1.11282	0.970057	1.00341	1.03738	1.14339
690	chr2	164318684	164918451	1.07176	1.15212	0.981474	0.979709	0.981474	0.816768	1.09297	1.01177	0.930903	0.814566	1.20105	1.00924	1.0023	1.01552	0.69684	0.864763	1.21361	1.16498	0.9996	0.9993	0.935008	1.00391	1.11997	1.1971	1.04081	0.96841	1.00441	1.02768	0.926446	1.09834	0.876078	0.946107	0.996506	1.07219	1.0319	0.920811	0.575509	0.829859	1.24061	0.994913	1.14191	1.45165	0.970057	1.00341	1.03738	1.14339
691	chr2	164918452	165555633	1.07176	1.15212	0.981474	0.979709	0.981474	0.816768	1.09297	1.01177	0.930903	0.814566	1.20105	1.00924	1.0023	1.01552	0.69684	0.864763	1.21361	1.16498	0.9996	0.9993	0.935008	1.00391	1.11997	1.1971	1.04081	0.96841	1.00441	1.02768	0.926446	1.09834	1.07778	0.946107	0.996506	1.07219	1.0319	0.920811	0.575509	0.829859	1.24061	0.994913	1.14191	1.45165	0.970057	1.00341	1.03738	1.14339
692	chr2	165555634	166160355	1.07176	1.15212	0.981474	0.979709	0.981474	0.816768	1.09297	1.01177	0.930903	0.814566	1.20105	1.00924	1.0023	1.01552	0.69684	0.864763	1.21361	1.16498	0.9996	0.9993	0.935008	1.00391	1.11997	1.1971	1.04081	0.96841	1.00441	1.02768	0.926446	1.09834	1.07778	0.946107	0.996506	1.07219	1.0319	0.920811	0.575509	0.829859	1.24061	0.994913	1.14191	1.45165	0.970057	1.00341	1.03738	1.14339
693	chr2	166160356	166760960	1.07176	1.15212	0.981474	0.979709	0.981474	0.816768	1.09297	1.01177	0.930903	0.814566	1.20105	1.00924	1.0023	1.01552	0.69684	0.864763	1.21361	1.16498	0.9996	0.9993	0.935008	1.00391	1.11997	1.1971	1.04081	0.96841	1.00441	1.02768	0.926446	1.09834	1.07778	0.946107	0.996506	1.07219	1.0319	0.920811	0.575509	0.829859	1.24061	0.994913	1.14191	1.45165	0.970057	1.00341	1.03738	1.14339
694	chr2	166760961	167384385	1.07176	1.15212	0.981474	0.979709	0.981474	0.816768	1.09297	1.01177	0.930903	0.814566	1.20105	1.00924	1.0023	1.01552	0.69684	0.864763	1.21361	1.16498	0.9996	0.9993	0.935008	1.00391	1.11997	1.1971	1.04081	0.96841	1.00441	1.02768	0.926446	1.09834	1.07778	0.946107	0.996506	1.07219	1.0319	0.920811	0.575509	0.829859	1.24061	0.994913	1.14191	1.45165	0.970057	1.00341	1.03738	1.14339
695	chr2	167384386	168043138	1.07176	1.15212	0.981474	0.979709	0.981474	0.816768	1.09297	1.01177	0.930903	0.814566	1.20105	1.00924	1.0023	1.01552	0.69684	0.864763	1.21361	1.16498	0.9996	0.9993	0.935008	1.00391	1.11997	1.1971	1.04081	0.96841	1.00441	1.02768	0.926446	1.09834	1.07778	0.946107	0.996506	1.07219	1.0319	0.920811	0.575509	0.829859	1.24061	0.994913	1.14191	1.45165	0.970057	1.00341	1.03738	1.14339
696	chr2	168043139	168676549	1.07176	1.15212	0.981474	0.979709	0.981474	0.816768	1.09297	1.01177	0.930903	0.814566	1.20105	1.00924	1.0023	1.01552	0.69684	0.864763	1.21361	1.16498	0.9996	0.9993	0.935008	1.00391	1.11997	1.1971	1.04081	0.96841	1.00441	1.02768	0.926446	1.09834	1.07778	0.946107	0.996506	1.07219	1.0319	0.920811	0.575509	0.829859	1.24061	0.994913	1.14191	1.45165	0.970057	1.00341	1.03738	1.14339
697	chr2	168676550	169245870	1.07176	1.15212	0.981474	0.979709	0.981474	0.816768	1.09297	0.570924	0.930903	0.814566	1.20105	1.00924	1.0023	0.52351	0.69684	0.864763	1.21361	1.16498	0.9996	0.9993	0.935008	1.00391	1.11997	1.1971	1.04081	0.96841	1.00441	1.02768	0.926446	1.09834	0.542319	0.946107	0.996506	1.07219	1.0319	0.490858	0.575509	0.829859	1.24061	0.994913	1.14191	1.45165	0.970057	1.00341	1.03738	1.14339
698	chr2	169245871	169827795	1.07176	1.15212	0.981474	0.979709	0.981474	0.380146	1.09297	0.570924	0.930903	0.814566	1.20105	1.00924	1.0023	0.52351	0.69684	0.864763	1.21361	1.16498	0.9996	0.9993	0.935008	1.00391	1.11997	1.1971	1.04081	0.96841	1.00441	1.02768	0.926446	1.09834	0.542319	0.946107	0.996506	1.07219	1.0319	0.490858	0.575509	0.829859	1.24061	0.994913	1.14191	1.45165	0.970057	1.00341	1.03738	1.14339
699	chr2	169827796	170444091	1.07176	1.15212	0.981474	0.979709	0.981474	0.380146	1.09297	0.570924	0.930903	0.814566	1.20105	1.00924	1.0023	0.52351	0.69684	0.864763	1.21361	1.16498	0.9996	0.9993	0.935008	1.00391	1.11997	1.1971	1.04081	0.96841	1.00441	1.02768	0.926446	1.09834	0.542319	0.946107	0.996506	1.07219	1.0319	0.490858	0.575509	0.829859	1.24061	0.994913	1.14191	1.45165	0.970057	1.00341	1.03738	1.14339
700	chr2	170444092	171083939	1.07176	0.627256	0.981474	0.979709	0.981474	0.380146	1.09297	0.570924	0.930903	0.814566	1.20105	1.00924	1.0023	0.52351	0.69684	0.864763	1.21361	1.16498	0.9996	0.9993	0.935008	1.00391	1.11997	1.1971	1.04081	0.96841	1.00441	1.02768	0.926446	1.09834	0.542319	0.946107	0.996506	1.07219	1.0319	0.490858	0.575509	0.829859	0.666244	0.994913	1.14191	1.45165	0.970057	1.00341	1.03738	1.14339
701	chr2	171083940	171664143	1.07176	0.627256	0.981474	0.979709	0.981474	0.380146	1.09297	0.570924	0.930903	0.814566	1.20105	1.00924	1.0023	0.52351	0.69684	0.864763	1.21361	1.16498	0.9996	0.9993	0.935008	1.00391	1.11997	1.1971	1.04081	0.96841	1.00441	1.02768	0.926446	1.09834	0.542319	0.946107	0.996506	1.07219	1.0319	0.490858	0.575509	0.574532	0.666244	0.994913	1.14191	0.542971	0.970057	1.00341	1.03738	1.14339
702	chr2	171664144	172256578	1.07176	0.627256	0.981474	0.979709	0.981474	0.380146	1.09297	0.570924	0.930903	0.814566	1.20105	1.00924	1.0023	0.52351	0.975407	0.864763	1.21361	1.16498	0.9996	0.9993	0.935008	1.00391	1.11997	1.1971	1.04081	0.96841	1.00441	1.02768	0.926446	1.09834	0.542319	0.946107	0.996506	1.07219	1.0319	0.490858	0.575509	0.574532	0.666244	0.994913	1.14191	0.542971	0.970057	1.00341	1.03738	1.14339
703	chr2	172256579	172837899	1.07176	0.627256	0.981474	0.979709	0.981474	0.380146	1.09297	0.570924	0.930903	0.814566	1.20105	1.00924	1.0023	0.52351	0.975407	0.864763	1.21361	0.946769	0.9996	0.9993	0.935008	1.00391	1.11997	1.1971	1.04081	0.96841	1.00441	1.02768	0.926446	1.09834	0.542319	0.946107	0.996506	1.07219	1.0319	0.490858	0.575509	0.574532	0.666244	0.994913	1.14191	0.542971	0.970057	1.00341	1.03738	1.14339
704	chr2	172837900	173373055	1.07176	0.627256	0.981474	0.979709	0.981474	0.380146	1.09297	0.570924	0.930903	0.814566	1.20105	1.00924	1.0023	0.52351	0.975407	0.864763	1.21361	0.946769	0.9996	0.9993	0.935008	1.00391	1.11997	1.1971	1.04081	0.96841	1.00441	1.02768	0.926446	1.09834	0.542319	0.946107	0.996506	0.980003	1.0319	0.490858	0.575509	0.574532	0.666244	0.994913	1.14191	0.542971	0.970057	1.00341	1.03738	1.14339
705	chr2	173373056	173922524	1.07176	0.627256	0.981474	0.979709	0.981474	0.380146	1.09297	0.570924	0.930903	0.814566	1.20105	1.00924	1.0023	0.52351	0.975407	0.864763	1.21361	0.946769	0.9996	0.9993	0.935008	1.00391	1.11997	1.1971	1.04081	0.96841	1.00441	1.02768	0.926446	1.09834	0.542319	0.946107	0.996506	0.980003	1.0319	0.490858	0.575509	0.574532	0.666244	0.994913	1.14191	0.542971	0.970057	1.00341	1.03738	1.14339
706	chr2	173922525	174488297	1.07176	0.627256	0.981474	0.979709	0.981474	0.380146	1.09297	0.570924	0.930903	0.814566	1.20105	1.00924	1.0023	0.638969	0.975407	0.864763	1.21361	0.946769	0.9996	0.9993	0.935008	1.00391	1.11997	1.1971	1.04081	0.96841	1.00441	1.02768	0.926446	1.09834	0.542319	0.946107	0.996506	0.980003	1.0319	0.490858	0.575509	0.751864	0.666244	0.994913	1.14191	0.542971	0.970057	1.00341	1.03738	1.14339
707	chr2	174488298	175042378	1.07176	0.627256	0.981474	0.979709	0.981474	0.380146	1.09297	0.570924	0.930903	0.575797	1.20105	1.00924	1.0023	0.638969	0.975407	0.864763	1.21361	0.946769	0.9996	0.9993	0.935008	1.00391	1.11997	1.1971	1.04081	0.96841	1.00441	1.02768	0.926446	1.09834	0.542319	0.946107	0.996506	0.980003	1.0319	0.490858	0.575509	0.751864	0.666244	0.994913	1.14191	1.25483	0.970057	1.00341	1.03738	1.14339
708	chr2	175042379	175633749	1.07176	1.17093	0.981474	0.979709	0.981474	0.380146	0.884175	0.570924	0.930903	0.575797	1.20105	1.00924	1.0023	0.638969	0.975407	0.864763	1.21361	0.946769	0.9996	0.9993	0.935008	1.00391	1.11997	1.1971	1.04081	0.96841	1.00441	1.02768	0.926446	1.09834	0.542319	0.946107	0.996506	0.980003	1.0319	0.490858	0.575509	0.751864	1.14866	0.994913	1.14191	1.25483	0.970057	1.00341	1.03738	1.14339
709	chr2	175633750	176213231	1.07176	1.17093	0.981474	0.979709	0.981474	0.380146	0.884175	0.570924	0.930903	0.575797	1.20105	1.00924	1.0023	0.638969	0.975407	0.864763	1.21361	0.946769	0.9996	0.9993	0.935008	1.00391	1.11997	1.1971	1.04081	0.96841	1.00441	1.02768	0.926446	1.09834	0.542319	0.946107	0.996506	0.980003	1.0319	0.490858	0.575509	0.751864	1.14866	0.994913	1.14191	1.25483	0.970057	1.00341	1.03738	1.14339
710	chr2	176213232	176781369	1.07176	1.17093	0.981474	0.979709	0.981474	0.380146	0.884175	0.570924	0.930903	0.575797	1.53818	1.00924	1.0023	0.638969	0.975407	0.864763	1.21361	0.946769	0.9996	0.9993	0.935008	1.00391	1.11997	1.1971	1.04081	0.96841	1.00441	1.02768	0.926446	1.09834	0.542319	0.946107	0.996506	0.980003	1.0319	0.490858	0.575509	0.751864	1.14866	0.994913	1.14191	1.25483	0.970057	1.00341	1.03738	1.14339
711	chr2	176781370	177396277	1.07176	1.17093	0.981474	0.979709	0.981474	0.380146	0.884175	0.570924	0.930903	0.575797	1.53818	1.00924	1.0023	0.638969	0.975407	0.864763	1.21361	0.946769	0.9996	0.9993	0.935008	1.00391	1.11997	1.1971	1.04081	0.96841	1.00441	1.02768	0.926446	1.09834	0.542319	0.946107	0.996506	0.980003	1.0319	0.490858	0.575509	0.751864	1.14866	0.994913	1.14191	1.25483	0.970057	1.00341	1.03738	1.14339
712	chr2	177396278	177924744	1.07176	1.17093	0.981474	0.979709	0.981474	0.380146	0.884175	0.570924	0.930903	0.575797	1.53818	1.00924	1.0023	0.638969	0.975407	0.982456	1.21361	0.946769	0.9996	0.9993	0.935008	1.00391	1.11997	1.1971	1.04081	0.96841	1.00441	1.02768	0.926446	1.09834	0.542319	0.946107	0.996506	0.980003	1.0319	0.490858	0.575509	0.751864	1.14866	0.994913	1.14191	1.25483	0.970057	1.00341	1.03738	1.14339
713	chr2	177924745	178500109	1.07176	1.17093	0.981474	0.979709	0.981474	0.380146	0.884175	0.570924	0.930903	0.575797	1.53818	1.00924	1.0023	0.638969	0.975407	0.982456	1.21361	0.946769	0.9996	0.9993	0.935008	1.00391	1.11997	1.1971	1.04081	0.96841	1.00441	1.02768	0.926446	1.09834	0.542319	0.946107	0.996506	0.980003	1.0319	0.490858	0.575509	0.751864	1.14866	0.994913	1.14191	1.25483	0.970057	1.00341	1.03738	1.14339
714	chr2	178500110	179081684	1.07176	1.17093	0.981474	0.979709	0.981474	0.380146	0.884175	0.570924	0.930903	0.575797	1.53818	1.00924	1.0023	0.638969	0.975407	0.982456	0.856586	0.946769	0.9996	0.9993	0.935008	1.00391	1.11997	1.1971	1.04081	1.23343	1.00441	1.02768	0.926446	1.09834	0.542319	0.946107	0.996506	0.980003	1.0319	0.490858	0.575509	0.751864	1.14866	0.994913	1.14191	1.25483	0.970057	1.00341	1.03738	1.14339
715	chr2	179081685	179614332	1.07176	1.17093	0.981474	0.979709	0.981474	0.814322	0.884175	0.570924	0.930903	0.575797	1.53818	1.00924	1.0023	0.638969	0.975407	0.982456	0.856586	0.946769	0.9996	0.9993	0.935008	1.00391	1.11997	1.1971	1.04081	1.23343	1.00441	1.02768	0.926446	1.09834	0.542319	0.946107	0.996506	0.980003	1.0319	0.919247	0.575509	0.751864	1.14866	0.994913	1.14191	1.25483	0.970057	1.00341	1.03738	1.14339
716	chr2	179614333	180228551	1.07176	1.17093	0.981474	0.979709	0.981474	0.814322	0.884175	0.9337	0.930903	0.902127	1.53818	1.00924	1.0023	1.0203	0.975407	0.982456	0.856586	0.946769	0.9996	0.9993	0.935008	1.00391	1.11997	1.1971	1.04081	1.23343	1.00441	1.02768	0.926446	1.09834	1.09024	0.946107	0.996506	0.980003	1.0319	0.919247	0.575509	0.751864	1.14866	0.994913	1.14191	1.25483	0.970057	1.00341	1.03738	1.14339
717	chr2	180228552	180821137	1.07176	0.625878	0.981474	0.979709	0.981474	0.814322	0.884175	0.9337	0.930903	0.902127	1.53818	1.00924	1.0023	1.0203	0.975407	0.982456	0.856586	0.946769	0.9996	0.9993	0.935008	1.00391	1.11997	1.1971	1.04081	1.23343	1.00441	1.02768	0.926446	1.09834	1.09024	0.946107	0.996506	0.980003	1.0319	0.919247	0.575509	0.52017	1.14866	0.994913	1.14191	1.25483	0.970057	1.00341	1.03738	1.14339
718	chr2	180821138	181430318	1.07176	0.625878	0.981474	0.979709	0.981474	0.814322	0.884175	0.9337	0.930903	0.902127	1.53818	1.00924	1.0023	1.0203	0.975407	0.982456	0.856586	0.946769	0.9996	0.9993	0.935008	1.00391	1.11997	1.1971	1.04081	1.23343	1.00441	1.02768	0.926446	1.09834	1.09024	0.946107	0.996506	0.980003	1.0319	0.919247	0.575509	0.52017	1.14866	0.994913	1.14191	0.314491	0.970057	1.00341	1.03738	1.14339
719	chr2	181430319	182040107	1.07176	0.625878	0.981474	0.979709	0.981474	0.814322	0.884175	0.9337	0.930903	0.902127	1.53818	1.00924	1.0023	1.0203	0.975407	0.982456	0.856586	0.946769	0.9996	0.9993	0.935008	1.00391	1.11997	1.1971	1.04081	1.23343	1.00441	1.02768	0.926446	1.09834	1.09024	0.946107	0.996506	0.980003	1.0319	0.919247	0.575509	0.52017	0.542536	0.994913	1.14191	0.314491	0.970057	1.00341	1.03738	1.14339
720	chr2	182040108	182629546	1.07176	0.625878	0.981474	0.979709	0.981474	0.814322	0.884175	0.9337	0.930903	1.03904	1.53818	1.00924	1.0023	1.0203	0.975407	0.982456	0.856586	0.946769	0.9996	0.9993	0.935008	1.00391	1.11997	1.1971	1.04081	1.23343	1.00441	1.02768	0.926446	1.09834	1.09024	0.946107	0.996506	0.980003	1.0319	0.919247	0.575509	0.52017	0.542536	0.994913	1.14191	0.314491	0.970057	1.00341	1.03738	1.14339
721	chr2	182629547	183214345	1.07176	0.625878	0.981474	0.979709	0.981474	0.814322	0.884175	0.9337	0.930903	1.03904	1.53818	1.00924	1.0023	1.0203	0.975407	0.982456	0.856586	0.946769	0.9996	0.9993	0.935008	1.00391	1.11997	1.1971	1.04081	1.23343	1.00441	1.02768	0.926446	1.09834	1.09024	0.946107	0.996506	0.980003	1.0319	0.919247	0.575509	0.52017	0.542536	0.994913	1.14191	0.314491	0.970057	1.00341	1.03738	1.14339
722	chr2	183214346	183814390	1.07176	0.625878	0.981474	0.979709	0.981474	0.814322	0.884175	0.9337	0.930903	1.03904	1.53818	1.00924	1.0023	1.0203	0.975407	1.0834	0.856586	0.946769	0.9996	0.9993	0.935008	1.00391	1.11997	1.1971	1.04081	1.23343	1.00441	1.02768	0.926446	1.09834	1.09024	0.946107	0.996506	0.980003	1.0319	0.919247	0.575509	0.52017	0.542536	0.994913	1.14191	0.314491	0.970057	1.00341	1.03738	1.14339
723	chr2	183814391	184443300	1.07176	0.625878	0.981474	0.979709	0.981474	0.814322	0.884175	0.9337	0.930903	1.03904	1.53818	1.00924	1.0023	1.0203	0.975407	1.0834	0.856586	0.946769	0.9996	0.9993	0.935008	1.00391	1.11997	1.1971	1.04081	1.23343	1.00441	1.02768	0.926446	1.09834	1.09024	0.946107	0.996506	0.980003	1.0319	0.919247	0.575509	0.52017	0.542536	0.994913	1.14191	0.314491	0.970057	1.00341	1.03738	1.14339
724	chr2	184443301	185119413	1.07176	0.625878	0.981474	0.979709	0.981474	0.814322	0.884175	0.9337	0.930903	1.03904	1.53818	1.00924	1.0023	1.0203	0.975407	1.0834	0.856586	0.946769	0.9996	0.9993	0.935008	1.00391	1.11997	1.1971	1.04081	1.23343	1.00441	1.02768	0.926446	1.09834	1.09024	0.946107	0.996506	0.980003	1.0319	0.919247	0.575509	0.52017	0.542536	0.994913	1.14191	0.314491	0.970057	1.00341	1.03738	0.93342
725	chr2	185119414	185776336	1.07176	0.625878	0.981474	0.979709	0.981474	0.814322	0.884175	0.9337	0.930903	1.03904	1.53818	1.00924	1.0023	1.0203	0.975407	1.0834	0.856586	0.946769	0.9996	0.9993	0.935008	1.00391	1.11997	1.1971	1.04081	1.23343	1.00441	1.02768	0.926446	1.09834	1.09024	0.946107	0.996506	0.980003	1.0319	0.919247	0.575509	0.52017	0.542536	0.994913	1.14191	0.314491	0.970057	1.00341	1.03738	0.93342
726	chr2	185776337	186457007	1.07176	0.625878	0.981474	0.979709	0.981474	0.814322	0.884175	0.9337	0.930903	1.03904	1.21094	1.00924	1.0023	1.0203	0.975407	0.989852	0.856586	0.946769	0.9996	0.9993	0.935008	1.00391	1.11997	1.1971	1.04081	1.23343	1.00441	1.02768	0.926446	1.09834	1.09024	0.946107	0.996506	0.980003	1.0319	0.919247	0.575509	0.52017	0.542536	0.994913	1.14191	0.314491	0.970057	1.00341	1.03738	0.93342
727	chr2	186457008	187101844	1.07176	0.625878	0.981474	0.979709	0.981474	0.814322	0.884175	0.9337	0.930903	1.03904	1.21094	1.00924	1.0023	1.0203	0.975407	0.989852	0.856586	0.946769	0.9996	0.9993	0.935008	1.00391	1.11997	1.1971	1.04081	1.23343	1.00441	1.02768	0.926446	1.09834	1.09024	0.946107	0.996506	0.980003	1.0319	0.919247	0.575509	0.52017	0.542536	0.994913	1.14191	0.314491	0.970057	1.00341	1.03738	0.93342
728	chr2	187101845	187690034	1.07176	0.625878	0.981474	0.979709	0.981474	0.814322	0.884175	0.9337	0.930903	1.03904	1.21094	1.00924	1.0023	1.0203	0.975407	0.989852	0.856586	0.946769	0.9996	0.9993	0.935008	1.00391	1.11997	1.1971	1.04081	1.23343	1.00441	1.02768	0.926446	1.09834	1.09024	0.946107	0.996506	0.980003	1.0319	0.919247	0.575509	0.52017	0.542536	0.994913	1.14191	0.314491	0.970057	1.00341	1.03738	0.93342
729	chr2	187690035	188318857	1.07176	0.625878	0.981474	0.979709	0.981474	0.814322	0.884175	0.9337	0.930903	1.03904	1.21094	1.00924	1.0023	1.0203	0.975407	0.989852	0.856586	0.946769	0.9996	0.9993	0.935008	1.00391	1.11997	1.1971	1.04081	1.23343	1.00441	1.02768	0.926446	1.09834	1.09024	0.946107	0.996506	0.980003	1.0319	0.919247	0.575509	0.52017	0.542536	0.994913	1.14191	0.314491	0.970057	1.00341	1.03738	0.93342
730	chr2	188318858	188967314	1.07176	0.625878	0.981474	0.979709	0.981474	0.814322	0.884175	0.9337	0.930903	1.03904	1.21094	1.00924	1.0023	1.0203	0.975407	0.909919	0.856586	0.946769	0.9996	0.9993	0.935008	1.00391	1.11997	1.1971	1.04081	1.23343	1.00441	1.02768	0.926446	1.09834	1.09024	0.946107	0.996506	0.980003	1.0319	0.919247	0.575509	0.52017	0.542536	0.994913	1.14191	0.314491	0.970057	1.00341	1.03738	0.93342
731	chr2	188967315	189597653	1.07176	0.625878	0.981474	0.979709	0.981474	0.814322	0.884175	0.9337	0.930903	0.904295	1.21094	1.00924	1.0023	1.0203	0.975407	0.909919	0.856586	0.946769	0.9996	0.9993	0.935008	1.00391	1.11997	1.1971	1.04081	1.23343	1.00441	1.02768	0.926446	1.09834	1.09024	0.946107	0.996506	0.980003	1.0319	0.919247	0.575509	0.52017	0.542536	0.994913	1.14191	0.314491	0.970057	1.00341	1.03738	0.93342
732	chr2	189597654	190194874	1.07176	0.625878	0.981474	0.979709	0.981474	0.814322	0.884175	0.9337	0.930903	0.904295	1.21094	1.00924	1.0023	1.0203	0.975407	0.909919	0.856586	0.946769	0.9996	0.9993	0.935008	1.00391	1.11997	1.1971	1.04081	1.23343	1.00441	1.02768	0.926446	1.09834	0.928857	0.946107	0.996506	0.980003	1.0319	0.919247	0.575509	0.52017	0.542536	0.994913	1.14191	0.314491	0.970057	1.00341	1.03738	0.93342
733	chr2	190194875	190809906	1.07176	0.625878	0.981474	0.979709	0.981474	0.814322	0.884175	0.9337	0.930903	0.904295	1.21094	1.00924	1.0023	1.0203	0.975407	0.909919	0.856586	0.946769	0.9996	0.9993	0.935008	1.00391	1.11997	1.1971	1.04081	1.23343	1.00441	1.02768	0.926446	1.09834	0.928857	0.946107	0.996506	0.980003	1.0319	0.919247	0.575509	0.52017	0.542536	0.994913	1.14191	0.314491	0.970057	1.00341	1.03738	0.93342
734	chr2	190809907	191405676	1.07176	0.625878	0.981474	0.979709	0.981474	0.814322	0.884175	0.9337	0.930903	0.904295	1.21094	1.00924	1.0023	1.0203	0.975407	0.909919	0.856586	0.946769	0.9996	0.9993	0.935008	1.00391	1.11997	1.1971	1.04081	1.23343	1.00441	1.02768	0.926446	1.09834	0.928857	0.946107	0.996506	0.980003	1.0319	0.919247	0.575509	0.52017	0.542536	0.994913	1.14191	0.314491	0.970057	1.00341	1.03738	0.93342
735	chr2	191405677	191967137	1.07176	0.625878	0.981474	0.979709	0.981474	0.814322	0.884175	0.9337	0.930903	0.904295	1.21094	1.00924	1.0023	1.0203	0.975407	0.909919	0.856586	0.946769	0.9996	0.9993	0.935008	1.00391	1.11997	1.1971	1.04081	1.23343	1.00441	1.02768	0.926446	1.09834	0.928857	0.946107	0.996506	0.980003	1.0319	0.919247	0.575509	0.52017	0.542536	0.994913	1.14191	0.314491	0.970057	1.00341	1.03738	0.93342
736	chr2	191967138	192506509	1.07176	0.625878	0.981474	0.979709	0.981474	0.814322	0.884175	0.9337	0.930903	0.904295	1.21094	1.00924	1.0023	1.0203	0.975407	0.909919	0.856586	0.946769	0.9996	0.9993	0.935008	1.00391	1.11997	1.1971	1.04081	1.23343	1.00441	1.02768	0.926446	0.732348	0.928857	0.946107	0.996506	0.980003	1.0319	0.919247	0.575509	0.52017	0.542536	0.994913	1.14191	0.314491	0.970057	1.00341	1.03738	0.93342
737	chr2	192506510	193081809	1.07176	0.625878	0.981474	0.979709	0.981474	1.17292	0.884175	0.9337	0.930903	0.904295	1.21094	1.00924	1.0023	1.0203	0.975407	0.909919	0.856586	0.946769	0.9996	0.9993	0.935008	1.00391	1.11997	1.1971	1.04081	1.23343	1.00441	1.02768	0.926446	0.732348	0.928857	0.946107	0.996506	0.980003	1.0319	0.919247	0.575509	0.52017	0.542536	0.994913	1.14191	0.314491	0.970057	1.00341	1.03738	0.93342
738	chr2	193081810	193742340	1.07176	0.625878	0.981474	0.979709	0.981474	1.17292	0.884175	0.9337	0.930903	1.12165	1.21094	1.00924	1.0023	1.0203	0.975407	0.909919	0.856586	0.946769	0.9996	0.9993	0.935008	1.00391	1.11997	1.1971	1.04081	1.23343	1.00441	1.02768	0.926446	0.732348	0.928857	0.946107	0.996506	0.980003	1.0319	0.919247	1.0349	0.52017	0.542536	0.994913	1.14191	0.314491	0.970057	1.00341	1.03738	0.93342
739	chr2	193742341	194427483	1.07176	1.08915	0.981474	0.979709	0.981474	1.17292	0.884175	0.9337	0.930903	1.12165	1.21094	1.00924	1.0023	1.0203	0.975407	0.909919	0.856586	0.946769	0.9996	0.9993	0.935008	1.00391	1.11997	1.1971	1.04081	1.23343	1.00441	1.02768	0.926446	0.732348	0.928857	0.946107	0.996506	0.980003	1.0319	0.919247	1.0349	0.835103	1.21094	0.994913	1.14191	1.07165	0.970057	1.00341	1.03738	0.93342
740	chr2	194427484	195109836	1.07176	1.08915	0.981474	0.979709	0.981474	1.17292	0.884175	0.9337	0.930903	1.12165	1.21094	1.00924	1.0023	1.0203	0.975407	0.909919	0.856586	0.946769	0.9996	0.9993	0.935008	1.00391	1.11997	1.1971	1.04081	1.23343	1.00441	1.02768	0.926446	0.732348	0.928857	0.946107	0.996506	0.980003	1.0319	0.919247	1.0349	0.835103	1.21094	0.994913	1.14191	1.07165	0.970057	1.00341	1.03738	0.93342
741	chr2	195109837	195769820	1.07176	1.08915	0.981474	0.979709	0.981474	1.17292	0.884175	0.9337	0.930903	1.12165	1.21094	1.00924	1.0023	1.0203	0.975407	0.909919	0.856586	0.946769	0.9996	0.9993	0.935008	1.00391	1.11997	1.1971	1.04081	1.23343	1.00441	1.02768	0.926446	0.732348	0.928857	0.946107	0.996506	0.980003	1.0319	0.919247	1.0349	0.835103	1.21094	0.994913	1.14191	1.07165	0.970057	1.00341	1.03738	0.93342
742	chr2	195769821	196384189	1.07176	1.08915	0.981474	0.979709	0.981474	1.17292	0.884175	0.9337	0.930903	1.12165	1.21094	1.00924	1.0023	1.0203	0.975407	0.909919	0.856586	0.946769	0.9996	0.9993	0.935008	1.00391	1.11997	1.1971	1.04081	1.23343	1.00441	1.02768	0.926446	0.987578	0.928857	0.946107	0.996506	0.980003	1.0319	0.919247	1.0349	0.835103	1.21094	0.994913	1.14191	1.07165	0.970057	1.00341	1.03738	0.93342
743	chr2	196384190	196993055	1.07176	1.08915	0.981474	0.979709	0.981474	1.17292	0.884175	0.9337	0.930903	1.12165	1.21094	1.00924	1.0023	1.0203	0.975407	0.909919	0.856586	0.946769	0.9996	0.9993	0.935008	1.00391	1.11997	1.1971	1.04081	1.23343	1.00441	1.02768	0.926446	0.987578	0.928857	0.946107	0.996506	0.980003	1.0319	0.919247	1.0349	0.835103	1.21094	0.994913	1.14191	1.07165	0.970057	1.00341	1.03738	0.93342
744	chr2	196993056	197578321	1.07176	1.08915	0.981474	0.979709	0.981474	1.17292	0.884175	0.9337	0.930903	1.12165	1.21094	1.00924	1.0023	1.0203	0.975407	0.909919	0.856586	0.946769	0.9996	0.9993	0.935008	1.00391	1.11997	1.1971	1.04081	1.23343	1.00441	1.02768	0.926446	0.987578	0.928857	0.946107	0.996506	0.980003	1.0319	0.919247	1.0349	0.835103	1.21094	0.994913	1.14191	1.07165	0.970057	1.00341	1.03738	0.93342
745	chr2	197578322	198147555	1.07176	1.08915	0.981474	0.979709	0.981474	1.17292	0.884175	0.9337	0.930903	1.12165	1.21094	1.00924	1.0023	1.0203	0.975407	0.909919	0.856586	0.946769	0.9996	0.9993	0.935008	1.00391	1.11997	1.1971	1.04081	1.23343	1.00441	1.02768	0.926446	0.987578	0.928857	0.946107	0.996506	1.08383	1.0319	0.919247	1.0349	0.835103	1.21094	0.994913	1.14191	1.07165	0.970057	1.00341	1.03738	0.93342
746	chr2	198147556	198762589	1.07176	1.08915	0.981474	0.979709	0.981474	1.17292	0.884175	0.9337	0.930903	1.12165	1.21094	1.00924	1.0023	1.0203	0.975407	0.909919	0.856586	0.946769	0.9996	0.9993	0.935008	1.00391	1.11997	1.1971	1.04081	1.23343	1.00441	1.02768	0.926446	0.987578	0.928857	0.946107	0.996506	1.08383	1.0319	0.919247	0.636354	0.835103	1.21094	0.994913	1.14191	1.07165	0.970057	1.00341	1.03738	0.93342
747	chr2	198762590	199332897	1.07176	1.08915	0.981474	0.979709	0.981474	1.17292	0.884175	0.9337	0.930903	1.12165	1.21094	1.00924	1.0023	1.0203	0.975407	0.909919	0.856586	1.21835	0.9996	0.9993	0.935008	1.00391	1.11997	1.1971	1.04081	1.23343	1.00441	1.02768	0.926446	0.987578	0.928857	0.946107	0.996506	1.08383	1.0319	0.919247	0.636354	0.835103	1.21094	0.994913	1.14191	1.07165	0.970057	1.00341	1.03738	0.93342
748	chr2	199332898	199954409	1.07176	1.08915	0.981474	0.979709	0.981474	1.17292	0.884175	0.9337	0.930903	1.12165	1.21094	1.00924	1.0023	1.0203	0.975407	1.02132	0.856586	1.21835	0.9996	0.9993	0.935008	1.00391	1.11997	1.1971	1.04081	1.23343	1.00441	1.02768	0.926446	0.987578	0.928857	0.946107	0.996506	1.08383	1.0319	0.919247	0.636354	0.835103	1.21094	0.994913	1.14191	1.07165	0.970057	1.00341	1.03738	0.93342
749	chr2	199954410	200535472	1.07176	1.08915	0.981474	0.979709	0.981474	1.17292	0.884175	0.9337	0.930903	1.12165	1.21094	1.00924	1.0023	1.0203	0.975407	1.02132	0.856586	1.21835	0.9996	0.9993	0.935008	1.00391	1.11997	1.1971	1.04081	1.23343	1.00441	1.02768	0.926446	0.987578	0.928857	0.946107	0.996506	1.08383	1.0319	0.919247	0.636354	0.835103	1.21094	0.994913	1.14191	1.07165	0.970057	1.00341	1.03738	0.93342
750	chr2	200535473	201105347	1.07176	1.08915	0.981474	0.979709	0.981474	1.17292	0.884175	0.9337	0.930903	1.12165	1.21094	1.00924	1.0023	1.0203	0.975407	1.02132	0.856586	1.21835	0.9996	0.9993	0.935008	1.00391	1.11997	1.1971	1.04081	1.23343	1.00441	1.02768	0.926446	0.987578	0.928857	0.946107	0.996506	1.08383	1.0319	0.919247	0.636354	0.835103	1.21094	0.994913	1.14191	1.07165	0.970057	1.00341	1.03738	0.93342
751	chr2	201105348	201640817	1.07176	1.08915	0.981474	0.979709	0.981474	1.17292	0.884175	0.9337	0.930903	0.945161	1.21094	1.00924	1.0023	1.0203	0.975407	1.02132	0.856586	1.21835	0.9996	0.9993	0.935008	1.00391	1.11997	1.1971	1.04081	1.23343	1.00441	1.02768	0.926446	0.987578	0.928857	0.946107	0.996506	1.08383	1.0319	0.919247	0.636354	0.835103	1.21094	0.994913	1.14191	1.07165	0.970057	1.00341	1.03738	0.93342
752	chr2	201640818	202243835	1.07176	1.08915	0.981474	0.979709	0.981474	1.17292	0.884175	0.9337	0.930903	0.945161	1.21094	1.00924	1.0023	1.0203	0.975407	1.02132	0.856586	0.865715	0.9996	0.9993	0.935008	1.00391	1.11997	1.1971	1.04081	1.23343	1.00441	1.02768	0.926446	0.987578	0.928857	0.946107	0.996506	1.08383	1.0319	0.919247	0.636354	0.835103	1.21094	0.994913	1.14191	1.07165	0.970057	1.00341	1.03738	0.93342
753	chr2	202243836	202819225	1.07176	1.08915	0.981474	0.979709	0.981474	1.17292	0.884175	0.9337	0.930903	0.945161	1.21094	1.00924	1.0023	1.0203	0.975407	1.02132	0.856586	0.865715	0.9996	0.9993	0.935008	1.00391	1.11997	1.1971	1.04081	1.23343	1.00441	1.02768	0.926446	0.987578	0.928857	0.946107	0.996506	1.02429	1.0319	0.919247	0.636354	0.835103	1.21094	0.994913	1.14191	1.07165	0.970057	1.00341	1.03738	0.93342
754	chr2	202819226	203379382	1.07176	1.08915	0.981474	0.979709	0.981474	1.17292	0.884175	0.9337	0.930903	0.753671	1.21094	1.00924	1.0023	1.0203	0.975407	1.02132	0.856586	0.865715	0.9996	0.9993	0.935008	1.00391	1.11997	1.1971	1.04081	1.23343	1.00441	1.02768	0.926446	0.987578	0.928857	0.946107	0.996506	1.02429	1.0319	0.919247	0.636354	0.835103	1.21094	0.994913	1.14191	1.07165	0.970057	1.00341	1.03738	0.93342
755	chr2	203379383	203988825	1.07176	1.08915	0.981474	0.979709	0.981474	1.17292	0.884175	0.9337	0.930903	0.753671	1.21094	1.00924	1.0023	1.0203	0.975407	1.02132	0.856586	0.865715	0.9996	0.9993	0.935008	1.00391	1.11997	1.1971	1.04081	1.23343	1.00441	1.02768	0.926446	0.987578	0.928857	0.946107	0.996506	1.02429	1.0319	0.919247	0.636354	0.835103	1.21094	0.994913	1.14191	1.07165	0.970057	1.00341	1.03738	0.93342
756	chr2	203988826	204595178	1.07176	1.08915	0.981474	0.979709	0.981474	1.17292	0.884175	0.9337	0.930903	0.753671	1.21094	1.00924	1.0023	1.0203	0.975407	1.02132	0.856586	0.865715	0.9996	0.9993	0.935008	1.00391	1.11997	1.1971	1.04081	1.23343	1.00441	1.02768	0.926446	0.987578	0.928857	0.946107	0.996506	1.02429	1.0319	0.919247	0.636354	0.835103	1.21094	0.994913	1.14191	1.07165	0.970057	1.00341	1.03738	0.93342
757	chr2	204595179	205122691	1.07176	1.08915	0.981474	0.979709	0.981474	1.17292	0.884175	0.9337	0.930903	0.753671	1.21094	1.00924	1.0023	1.0203	0.975407	1.02132	0.856586	0.865715	0.9996	0.9993	0.935008	1.00391	1.11997	1.1971	1.04081	1.23343	1.00441	1.02768	0.926446	0.987578	0.928857	0.946107	0.996506	1.02429	1.0319	0.919247	0.636354	0.835103	1.21094	0.994913	1.14191	1.07165	0.970057	1.00341	1.03738	0.93342
758	chr2	205122692	205664049	1.07176	1.08915	0.981474	0.979709	0.981474	1.17292	0.884175	0.9337	0.930903	0.753671	1.21094	1.00924	1.0023	1.0203	0.975407	1.02132	0.856586	1.21167	0.9996	0.9993	0.935008	1.00391	1.11997	1.1971	1.04081	1.23343	1.00441	1.02768	0.926446	0.987578	0.928857	0.946107	0.996506	1.02429	1.0319	0.919247	0.636354	0.835103	1.21094	0.994913	1.14191	1.07165	0.970057	1.00341	1.03738	0.93342
759	chr2	205664050	206248399	1.07176	1.08915	0.981474	0.979709	0.981474	1.17292	0.884175	0.9337	0.930903	1.25295	1.21094	1.00924	1.0023	1.0203	0.975407	1.02132	0.856586	1.21167	0.9996	0.9993	1.25671	1.00391	1.11997	1.1971	1.04081	1.23343	1.00441	1.02768	0.926446	0.987578	0.928857	0.946107	0.996506	1.38694	1.0319	0.919247	0.636354	0.835103	1.21094	0.994913	1.14191	1.07165	0.970057	1.00341	1.03738	0.93342
760	chr2	206248400	206775185	1.07176	1.08915	1.23011	0.979709	0.981474	1.17292	0.884175	0.9337	0.930903	1.25295	1.21094	1.00924	1.0023	1.0203	0.975407	1.02132	1.26605	1.21167	0.9996	0.9993	1.25671	1.00391	1.11997	1.1971	1.04081	1.23343	1.00441	1.02768	0.926446	0.987578	0.928857	0.946107	0.996506	1.38694	1.0319	0.919247	0.636354	0.835103	1.21094	0.994913	1.14191	1.07165	0.970057	1.00341	1.03738	0.93342
761	chr2	206775186	207360490	1.07176	1.08915	1.23011	0.979709	0.981474	1.17292	0.884175	0.9337	0.930903	1.25295	1.21094	1.00924	1.0023	1.0203	0.975407	1.02132	1.26605	1.21167	0.9996	0.9993	1.25671	1.00391	1.11997	1.1971	1.04081	1.23343	1.00441	1.02768	0.926446	0.987578	0.928857	0.946107	0.996506	1.38694	1.0319	0.919247	0.636354	0.835103	1.21094	0.994913	1.14191	1.07165	0.970057	1.00341	1.03738	0.93342
762	chr2	207360491	207937130	1.07176	1.08915	1.23011	0.979709	0.981474	1.17292	0.884175	0.9337	0.930903	0.83887	1.21094	1.00924	1.0023	1.0203	0.975407	0.915303	1.26605	1.21167	0.9996	0.9993	0.944783	1.00391	1.11997	1.1971	1.04081	1.23343	1.00441	1.02768	0.926446	0.987578	0.928857	0.946107	0.996506	1.07304	1.0319	0.919247	0.636354	0.835103	1.21094	0.994913	1.14191	1.07165	0.970057	1.00341	1.03738	0.93342
763	chr2	207937131	208478443	1.07176	1.08915	1.23011	0.979709	0.981474	1.17292	0.884175	0.9337	0.930903	0.83887	1.21094	1.00924	1.0023	1.0203	0.975407	0.915303	1.26605	1.21167	0.9996	0.9993	0.944783	1.00391	1.11997	1.1971	1.04081	1.23343	1.00441	1.02768	0.926446	0.987578	0.928857	0.946107	0.996506	1.07304	1.0319	0.919247	0.636354	0.835103	1.21094	0.994913	1.14191	1.07165	0.970057	1.00341	1.03738	0.93342
764	chr2	208478444	209044578	1.07176	1.08915	1.23011	0.979709	0.981474	1.17292	0.884175	0.9337	0.930903	0.83887	1.21094	1.00924	1.0023	1.0203	0.975407	0.915303	1.26605	1.21167	0.9996	0.9993	0.944783	1.00391	1.11997	1.1971	1.04081	1.23343	1.00441	1.02768	0.926446	0.987578	0.928857	0.946107	0.996506	1.07304	1.0319	0.919247	0.636354	0.835103	1.21094	0.994913	1.14191	1.07165	0.970057	1.00341	1.03738	0.93342
765	chr2	209044579	209665572	1.07176	1.08915	1.23011	0.979709	0.981474	1.17292	0.884175	0.9337	0.930903	0.83887	1.21094	1.00924	1.0023	1.0203	0.975407	0.915303	1.26605	1.21167	0.9996	0.9993	0.944783	1.00391	1.11997	1.1971	1.04081	1.23343	1.00441	1.02768	0.926446	0.987578	0.928857	0.946107	0.996506	1.07304	1.0319	0.919247	0.636354	0.835103	1.21094	0.994913	1.14191	1.07165	0.970057	1.00341	1.03738	0.93342
766	chr2	209665573	210327104	1.07176	1.08915	1.23011	0.979709	0.981474	1.17292	0.884175	0.9337	0.930903	0.83887	1.21094	1.00924	1.0023	1.0203	0.975407	0.915303	1.26605	1.21167	0.9996	0.9993	0.944783	1.00391	1.11997	1.1971	1.04081	1.23343	1.00441	1.02768	0.926446	0.987578	0.928857	0.946107	0.996506	1.07304	1.0319	0.919247	0.636354	0.835103	1.21094	0.994913	1.14191	1.07165	0.970057	1.00341	1.03738	0.93342
767	chr2	210327105	210935925	1.07176	1.08915	1.23011	0.979709	0.981474	1.17292	0.884175	0.9337	0.930903	0.83887	1.21094	1.00924	1.0023	1.0203	0.975407	0.915303	1.26605	1.21167	0.9996	0.9993	0.944783	1.00391	1.11997	1.1971	1.04081	1.23343	1.00441	1.02768	0.926446	0.987578	0.928857	0.946107	0.996506	1.07304	1.0319	0.919247	0.636354	0.835103	1.21094	0.994913	1.14191	1.07165	0.970057	1.00341	1.03738	0.93342
768	chr2	210935926	211557616	1.07176	1.08915	1.23011	0.979709	0.981474	1.17292	0.884175	0.9337	0.930903	0.83887	1.21094	1.00924	1.0023	1.0203	0.615697	0.915303	1.26605	1.02644	0.9996	0.9993	0.944783	1.00391	1.11997	1.1971	1.04081	1.23343	1.00441	1.02768	0.926446	0.987578	0.928857	0.946107	0.996506	1.07304	1.0319	0.919247	0.636354	0.835103	1.21094	0.994913	1.14191	1.07165	0.970057	1.00341	1.03738	0.93342
769	chr2	211557617	212201685	1.07176	1.08915	1.23011	0.979709	0.981474	1.17292	0.884175	0.9337	0.930903	0.83887	1.21094	1.00924	1.0023	1.0203	0.615697	0.915303	1.26605	1.02644	0.9996	0.9993	0.944783	1.00391	1.11997	1.1971	1.04081	1.23343	1.00441	1.02768	0.926446	0.987578	0.928857	0.946107	0.996506	1.07304	1.0319	0.919247	0.636354	0.835103	1.21094	0.994913	1.14191	1.07165	0.970057	1.00341	1.03738	0.93342
770	chr2	212201686	212847733	1.07176	1.08915	0.952276	0.979709	0.981474	1.17292	0.884175	0.9337	0.930903	0.83887	1.21094	1.00924	1.0023	1.0203	0.615697	0.915303	1.26605	1.02644	0.9996	0.9993	0.944783	1.00391	1.11997	1.1971	1.04081	1.23343	1.00441	1.02768	0.926446	0.987578	0.928857	0.946107	0.996506	1.07304	1.0319	0.919247	0.636354	0.835103	1.21094	0.994913	1.14191	1.07165	0.970057	1.00341	1.03738	0.93342
771	chr2	212847734	213494318	1.07176	1.08915	0.952276	0.979709	0.981474	1.17292	0.884175	0.9337	0.930903	0.83887	1.21094	1.00924	1.0023	1.0203	0.615697	0.915303	1.26605	1.02644	0.9996	0.9993	0.944783	0.615143	1.11997	1.1971	1.04081	1.23343	1.00441	1.02768	0.926446	0.987578	0.928857	0.946107	0.996506	1.07304	1.0319	0.919247	0.636354	0.835103	1.21094	0.994913	1.14191	1.07165	0.970057	1.00341	1.03738	0.93342
772	chr2	213494319	214086631	1.07176	1.08915	0.952276	0.979709	0.981474	1.17292	0.884175	0.9337	0.930903	0.83887	1.21094	1.00924	1.0023	1.0203	0.615697	0.915303	1.26605	1.02644	0.9996	0.9993	0.944783	0.615143	1.11997	1.1971	1.04081	1.23343	1.00441	1.02768	0.926446	0.987578	0.928857	0.946107	0.996506	1.07304	1.0319	0.919247	0.636354	0.835103	1.21094	0.994913	1.14191	1.07165	0.970057	1.00341	1.03738	0.93342
773	chr2	214086632	214727215	1.07176	1.08915	0.952276	0.979709	0.981474	1.17292	0.884175	0.9337	0.930903	0.83887	1.21094	1.00924	1.0023	1.0203	0.615697	0.915303	0.799795	1.02644	0.9996	0.9993	0.944783	0.615143	1.11997	1.1971	1.04081	1.23343	1.00441	1.02768	0.926446	0.987578	0.928857	0.946107	0.996506	1.07304	1.0319	0.919247	0.636354	0.835103	1.21094	0.994913	1.14191	1.07165	0.970057	1.00341	1.03738	0.93342
774	chr2	214727216	215339671	1.07176	1.08915	0.952276	0.979709	0.981474	1.17292	0.884175	0.9337	0.930903	0.83887	1.21094	1.00924	1.0023	1.0203	0.615697	0.915303	0.799795	1.02644	0.9996	0.9993	0.944783	0.615143	1.11997	1.1971	1.04081	1.23343	1.00441	1.02768	0.926446	0.987578	0.928857	0.946107	0.996506	1.07304	1.0319	0.919247	0.636354	0.835103	1.21094	0.994913	1.14191	1.07165	0.970057	1.00341	1.03738	0.93342
775	chr2	215339672	215951543	1.07176	1.08915	0.952276	0.979709	0.981474	1.17292	0.884175	0.9337	0.930903	0.83887	1.21094	1.00924	1.0023	1.0203	0.615697	0.915303	0.799795	1.02644	0.9996	0.9993	0.944783	1.02593	1.11997	1.1971	1.04081	1.23343	1.00441	1.02768	0.926446	0.987578	0.928857	0.946107	0.996506	1.07304	1.0319	0.919247	0.636354	0.835103	1.21094	0.994913	1.14191	1.07165	0.970057	1.00341	1.03738	0.93342
776	chr2	215951544	216518299	1.07176	1.08915	0.952276	0.979709	0.981474	1.17292	0.884175	0.9337	0.930903	0.83887	1.21094	1.00924	1.0023	1.0203	0.615697	0.915303	0.799795	1.02644	0.9996	0.9993	0.944783	1.02593	1.11997	1.1971	1.04081	1.23343	1.00441	1.02768	0.926446	0.987578	0.928857	0.946107	0.996506	1.07304	1.0319	0.919247	0.636354	0.835103	1.21094	0.994913	1.14191	1.07165	0.970057	1.00341	1.03738	0.93342
777	chr2	216518300	217059858	1.07176	1.08915	0.952276	0.979709	0.981474	1.17292	0.884175	0.9337	0.930903	1.0012	1.21094	1.00924	1.0023	1.0203	0.615697	0.915303	0.799795	1.02644	0.9996	0.9993	0.944783	1.02593	1.11997	1.1971	1.04081	1.23343	1.00441	1.02768	0.926446	0.987578	0.928857	0.946107	0.996506	1.07304	1.0319	0.919247	0.636354	0.835103	1.21094	0.994913	1.14191	1.07165	0.970057	1.00341	1.03738	0.93342
778	chr2	217059859	217563699	1.07176	1.08915	0.952276	0.979709	0.981474	1.17292	0.884175	0.9337	0.930903	1.0012	1.21094	1.00924	1.0023	1.0203	0.615697	0.915303	0.799795	1.02644	0.9996	0.9993	0.944783	1.02593	1.11997	1.1971	1.04081	0.858044	1.00441	1.02768	0.926446	0.987578	0.928857	0.946107	0.996506	1.07304	1.0319	0.919247	0.387051	0.835103	1.21094	0.994913	1.14191	1.07165	0.970057	1.00341	1.03738	0.93342
779	chr2	217563700	218084158	1.07176	1.08915	0.952276	0.979709	0.981474	1.17292	0.884175	0.9337	0.930903	1.0012	1.21094	1.00924	1.0023	1.0203	0.615697	0.915303	0.799795	1.02644	0.9996	0.9993	0.944783	1.02593	1.11997	1.1971	1.04081	0.858044	1.00441	1.02768	0.926446	0.987578	0.928857	0.946107	0.996506	1.07304	1.0319	0.919247	0.387051	0.835103	1.21094	0.994913	1.14191	1.07165	0.970057	1.00341	1.03738	0.93342
780	chr2	218084159	218587933	1.07176	1.08915	0.952276	0.979709	0.981474	1.17292	0.884175	0.9337	0.930903	1.0012	1.21094	1.00924	1.0023	1.0203	0.615697	0.915303	0.799795	1.02644	0.9996	0.9993	0.944783	1.02593	1.11997	1.1971	1.04081	0.858044	1.00441	1.02768	0.926446	0.987578	0.928857	0.946107	0.996506	1.07304	1.0319	0.919247	0.387051	0.835103	1.21094	0.994913	1.14191	1.07165	0.970057	1.00341	1.03738	0.93342
781	chr2	218587934	219104607	1.07176	1.08915	0.952276	0.979709	0.981474	1.17292	0.884175	0.9337	0.930903	1.0012	1.21094	1.00924	1.0023	1.0203	0.615697	0.915303	0.799795	1.02644	0.9996	0.9993	0.944783	1.02593	1.11997	1.1971	1.04081	0.858044	1.00441	1.02768	0.926446	0.987578	0.928857	0.946107	0.996506	1.07304	1.0319	0.919247	0.387051	0.835103	1.21094	0.994913	1.14191	1.07165	0.970057	1.00341	1.03738	0.93342
782	chr2	219104608	219675654	1.07176	1.08915	0.952276	0.979709	0.981474	1.17292	0.884175	0.9337	0.930903	1.0012	1.21094	1.00924	1.0023	1.0203	0.615697	0.915303	0.799795	1.02644	0.9996	0.9993	0.944783	1.02593	1.11997	1.1971	1.04081	0.858044	1.00441	1.02768	0.926446	0.987578	0.928857	0.946107	0.996506	1.07304	1.0319	0.919247	0.387051	0.835103	1.21094	0.994913	1.14191	1.48305	0.970057	1.00341	1.03738	0.93342
783	chr2	219675655	220216779	1.07176	1.08915	0.952276	0.979709	0.981474	1.17292	0.884175	0.9337	0.930903	1.0012	1.21094	1.00924	1.0023	1.0203	0.615697	0.915303	0.799795	1.02644	0.9996	0.9993	0.652268	1.02593	1.11997	1.1971	1.04081	0.858044	1.00441	1.02768	0.926446	0.987578	0.928857	0.946107	0.996506	1.07304	1.0319	0.919247	0.387051	0.835103	1.21094	0.994913	1.14191	1.48305	0.970057	1.00341	1.03738	0.93342
784	chr2	220216780	220747118	1.07176	1.08915	0.952276	0.979709	0.981474	1.17292	0.884175	0.9337	0.930903	0.752165	1.21094	1.00924	1.0023	1.0203	0.615697	0.915303	0.799795	1.02644	0.9996	0.9993	0.652268	1.02593	1.11997	1.1971	1.04081	1.19506	1.00441	1.02768	0.926446	0.987578	0.928857	0.946107	0.996506	1.07304	1.0319	0.919247	0.387051	0.835103	1.21094	0.994913	1.14191	1.48305	0.970057	1.00341	1.03738	0.93342
785	chr2	220747119	221294784	1.07176	1.08915	0.952276	0.979709	0.981474	1.17292	0.884175	0.9337	0.930903	0.752165	1.21094	1.00924	1.0023	1.0203	0.615697	0.915303	0.799795	1.02644	0.9996	0.9993	0.652268	1.02593	1.11997	1.1971	1.04081	1.19506	1.00441	1.02768	0.926446	0.987578	0.928857	0.946107	0.996506	1.07304	1.0319	0.919247	0.387051	0.835103	1.21094	0.994913	1.14191	1.48305	0.970057	1.00341	1.03738	0.93342
786	chr2	221294785	221885611	1.07176	1.08915	0.952276	0.979709	0.981474	1.17292	0.884175	0.9337	0.930903	0.752165	1.21094	1.00924	1.0023	1.0203	0.615697	0.915303	0.799795	1.02644	0.9996	0.9993	0.652268	1.02593	1.11997	1.1971	1.04081	1.19506	1.00441	1.02768	0.926446	0.987578	0.928857	0.946107	0.996506	1.07304	1.0319	0.919247	0.639672	0.835103	1.21094	0.994913	1.14191	1.48305	0.970057	1.00341	1.03738	0.93342
787	chr2	221885612	222461365	1.07176	1.08915	0.952276	0.979709	0.981474	1.17292	0.884175	0.9337	0.930903	0.752165	1.21094	1.00924	1.0023	1.0203	0.615697	0.915303	0.799795	1.02644	0.9996	0.9993	0.652268	1.02593	1.11997	1.36547	1.04081	1.19506	1.00441	1.02768	0.926446	0.987578	0.928857	0.946107	0.996506	1.07304	1.0319	0.919247	0.639672	0.835103	1.21094	0.994913	1.14191	1.48305	0.970057	1.00341	1.03738	0.93342
788	chr2	222461366	223056810	1.07176	1.08915	0.952276	0.979709	0.981474	1.17292	0.884175	0.9337	0.930903	0.752165	1.21094	1.00924	1.0023	1.0203	0.615697	0.915303	0.799795	0.876429	0.9996	0.9993	0.652268	1.02593	1.11997	1.36547	1.04081	1.19506	1.00441	1.02768	0.926446	0.987578	0.928857	0.946107	0.996506	1.07304	1.0319	0.919247	0.639672	0.835103	1.21094	0.994913	1.14191	1.48305	0.970057	1.00341	1.03738	0.93342
789	chr2	223056811	223645923	1.07176	1.08915	0.952276	0.979709	0.981474	1.17292	0.884175	0.9337	0.930903	0.752165	1.21094	1.00924	1.0023	1.0203	0.615697	0.915303	0.799795	0.876429	0.9996	0.9993	0.652268	1.02593	1.11997	1.36547	1.04081	1.19506	1.00441	1.02768	0.926446	0.987578	0.928857	0.946107	0.996506	1.07304	1.0319	0.919247	0.639672	0.835103	1.21094	0.994913	1.14191	1.48305	0.970057	1.00341	1.03738	0.93342
790	chr2	223645924	224244990	1.07176	1.08915	0.952276	0.979709	0.981474	1.17292	0.884175	0.9337	0.930903	0.752165	1.21094	1.00924	1.0023	1.0203	0.615697	0.915303	0.799795	0.876429	0.9996	0.9993	0.652268	1.02593	1.11997	1.36547	1.04081	1.19506	1.00441	1.02768	0.926446	0.987578	0.928857	0.946107	0.996506	1.07304	1.0319	0.919247	0.639672	0.835103	1.21094	0.994913	1.14191	1.33991	0.970057	1.00341	1.03738	0.93342
791	chr2	224244991	224837838	1.07176	1.08915	0.952276	0.979709	0.981474	1.17292	0.884175	0.9337	0.930903	0.752165	1.21094	1.00924	1.0023	1.0203	0.615697	0.915303	0.799795	0.876429	0.9996	0.9993	0.652268	1.02593	1.11997	1.36547	1.04081	1.19506	1.00441	1.02768	0.926446	0.987578	0.928857	0.946107	0.996506	1.07304	1.0319	0.919247	0.639672	0.835103	1.21094	0.994913	1.14191	1.33991	0.970057	1.00341	1.03738	0.93342
792	chr2	224837839	225390734	1.07176	1.08915	0.952276	0.979709	0.981474	1.17292	0.884175	0.9337	0.930903	0.752165	1.21094	1.00924	1.0023	0.821109	0.615697	0.915303	0.799795	0.876429	0.9996	0.9993	0.652268	1.02593	1.11997	1.36547	1.04081	1.19506	1.00441	1.02768	0.926446	0.987578	0.928857	0.946107	0.996506	1.07304	1.0319	0.919247	0.639672	0.835103	1.21094	0.994913	1.14191	1.33991	0.970057	1.00341	1.03738	0.93342
793	chr2	225390735	225979313	1.07176	1.08915	0.952276	0.979709	0.981474	1.17292	0.884175	0.9337	0.930903	0.752165	1.21094	1.00924	1.0023	0.821109	0.615697	0.915303	0.799795	0.876429	0.9996	0.9993	0.652268	1.02593	1.11997	1.36547	1.04081	1.19506	1.00441	1.02768	0.926446	0.987578	0.928857	0.946107	0.996506	1.07304	1.0319	0.919247	0.639672	0.835103	1.21094	0.994913	1.14191	1.33991	0.970057	1.00341	1.03738	0.93342
794	chr2	225979314	226574258	1.07176	1.08915	0.952276	0.979709	0.981474	1.17292	0.884175	0.9337	0.930903	0.752165	1.21094	1.00924	1.0023	0.821109	0.615697	0.915303	0.799795	0.876429	0.9996	0.9993	0.652268	1.02593	1.11997	1.36547	1.04081	1.19506	1.00441	1.02768	0.926446	0.987578	0.928857	0.946107	0.996506	1.07304	1.0319	0.919247	0.639672	0.835103	1.21094	0.994913	1.14191	1.33991	0.970057	1.00341	1.03738	0.93342
795	chr2	226574259	227179963	1.07176	1.08915	0.952276	0.979709	0.981474	1.17292	0.884175	0.9337	0.930903	1.04676	1.21094	1.00924	1.0023	0.821109	0.615697	0.915303	0.799795	0.876429	0.9996	0.9993	0.652268	1.02593	1.11997	1.36547	1.04081	1.19506	1.00441	1.02768	0.926446	0.987578	0.928857	0.946107	0.996506	1.07304	1.0319	0.919247	0.639672	0.835103	1.21094	0.994913	1.14191	1.33991	0.970057	1.00341	1.03738	0.93342
796	chr2	227179964	227734047	1.07176	1.08915	0.952276	0.979709	0.981474	1.17292	0.884175	0.9337	0.930903	1.04676	1.21094	1.00924	1.0023	0.821109	0.615697	0.915303	0.799795	0.876429	0.9996	0.9993	0.652268	1.02593	1.11997	1.36547	1.04081	1.19506	1.00441	1.02768	0.926446	0.987578	0.928857	0.946107	0.996506	1.07304	1.0319	0.919247	0.639672	0.835103	1.21094	0.994913	1.14191	1.33991	0.970057	1.00341	1.03738	0.93342
797	chr2	227734048	228284248	1.07176	1.08915	0.952276	0.979709	0.981474	1.17292	0.884175	0.9337	0.930903	1.04676	1.21094	1.00924	1.0023	0.821109	0.615697	0.915303	0.799795	0.876429	0.9996	0.9993	0.652268	1.02593	1.11997	1.36547	1.04081	0.99005	1.00441	1.02768	0.926446	0.987578	0.928857	0.946107	0.996506	1.07304	1.0319	0.919247	1.05064	0.835103	1.21094	0.994913	1.14191	1.33991	0.970057	1.00341	1.03738	0.93342
798	chr2	228284249	228888784	1.07176	1.08915	0.952276	0.979709	0.981474	1.17292	0.884175	0.9337	0.930903	1.04676	1.21094	1.00924	1.0023	0.821109	0.615697	0.915303	0.799795	0.876429	0.9996	0.9993	0.652268	1.02593	1.11997	1.36547	1.04081	0.99005	1.00441	1.02768	0.926446	0.987578	0.928857	0.946107	0.996506	1.07304	1.0319	0.919247	1.05064	0.835103	1.21094	0.994913	1.14191	1.33991	0.970057	1.00341	1.03738	0.93342
799	chr2	228888785	229517674	1.07176	1.08915	0.952276	0.979709	0.981474	1.17292	0.884175	0.9337	0.930903	1.04676	1.21094	1.00924	1.0023	0.821109	0.615697	0.915303	0.54194	0.876429	0.9996	0.9993	0.652268	1.02593	1.11997	1.36547	1.04081	0.99005	1.00441	1.02768	0.926446	0.987578	0.928857	0.946107	0.996506	1.07304	1.0319	0.919247	1.05064	0.835103	1.21094	0.994913	1.14191	1.33991	0.970057	1.00341	1.03738	0.93342
800	chr2	229517675	230092662	1.07176	1.08915	0.952276	0.979709	0.981474	1.17292	0.884175	0.9337	0.930903	1.04676	1.21094	1.00924	1.0023	0.821109	0.615697	0.915303	0.54194	0.876429	0.9996	0.9993	0.652268	1.02593	1.11997	1.36547	1.04081	0.99005	1.00441	1.02768	0.926446	0.987578	0.928857	0.946107	0.996506	1.07304	1.0319	0.919247	1.05064	0.835103	1.21094	0.994913	1.14191	1.33991	0.970057	1.00341	1.03738	0.93342
801	chr2	230092663	230641378	1.07176	1.08915	0.952276	0.979709	0.981474	1.17292	0.884175	0.9337	0.930903	1.04676	1.21094	1.00924	1.0023	0.821109	0.615697	0.915303	0.54194	0.876429	0.9996	0.9993	0.652268	1.02593	1.11997	1.36547	1.04081	0.99005	1.00441	1.02768	0.926446	0.987578	0.928857	0.946107	0.996506	1.07304	1.0319	0.919247	1.05064	0.835103	1.21094	0.994913	1.14191	1.05993	0.970057	1.00341	1.03738	0.93342
802	chr2	230641379	231237245	1.07176	1.08915	0.952276	0.979709	0.981474	1.17292	0.884175	0.9337	0.930903	1.04676	1.21094	1.00924	1.0023	0.821109	0.615697	0.915303	0.54194	0.876429	0.9996	0.9993	0.652268	1.02593	1.11997	1.36547	1.04081	0.99005	1.00441	1.02768	0.926446	0.987578	0.928857	0.946107	0.996506	1.07304	1.0319	0.919247	1.05064	0.835103	1.21094	0.994913	1.14191	1.05993	0.970057	1.00341	1.03738	0.93342
803	chr2	231237246	231801013	1.07176	1.08915	0.952276	0.979709	0.981474	1.17292	0.884175	0.9337	0.930903	1.04676	1.21094	1.00924	1.0023	0.821109	0.615697	0.915303	0.54194	0.876429	0.9996	0.9993	0.652268	1.02593	1.11997	1.36547	1.04081	0.99005	1.00441	1.02768	0.926446	0.987578	0.928857	0.946107	0.996506	1.07304	1.0319	0.919247	1.05064	0.835103	1.21094	0.994913	1.14191	1.05993	0.970057	1.00341	1.03738	0.93342
804	chr2	231801014	232338955	1.07176	1.08915	0.952276	0.979709	0.981474	1.17292	0.884175	0.9337	0.930903	1.04676	1.21094	1.00924	1.0023	0.821109	0.615697	0.915303	0.54194	0.876429	0.9996	0.9993	0.769357	1.02593	1.11997	1.36547	1.04081	0.99005	1.00441	1.02768	0.926446	0.987578	0.928857	0.946107	0.996506	1.07304	1.0319	0.919247	1.05064	0.835103	1.21094	0.994913	1.14191	1.05993	0.970057	1.00341	1.03738	0.93342
805	chr2	232338956	232932775	1.07176	1.08915	0.952276	0.979709	0.981474	1.17292	0.884175	0.9337	0.930903	1.04676	1.21094	1.00924	1.0023	0.821109	0.615697	0.915303	0.915303	0.876429	0.9996	0.9993	0.769357	1.02593	1.11997	0.946012	1.04081	0.99005	1.00441	1.02768	0.926446	0.987578	0.928857	0.946107	0.996506	1.07304	1.0319	0.919247	1.05064	0.835103	1.21094	0.994913	1.14191	1.05993	0.970057	1.00341	1.03738	0.93342
806	chr2	232932776	233477646	1.07176	1.08915	0.952276	0.979709	0.981474	1.17292	0.884175	0.9337	0.930903	1.04676	1.21094	1.00924	1.0023	0.821109	0.615697	0.915303	0.915303	0.876429	0.9996	0.9993	0.769357	1.02593	1.11997	0.946012	1.04081	0.99005	1.00441	1.02768	0.926446	0.987578	0.928857	0.946107	0.996506	1.07304	1.0319	0.919247	1.05064	0.835103	1.21094	0.994913	1.14191	1.05993	0.970057	1.00341	1.03738	0.93342
807	chr2	233477647	234100936	1.07176	1.08915	0.952276	0.979709	0.981474	1.17292	0.884175	0.9337	0.930903	1.04676	1.21094	1.00924	1.0023	0.821109	0.921548	0.915303	0.915303	0.876429	0.9996	0.9993	0.769357	1.02593	1.11997	0.946012	1.04081	0.99005	1.00441	1.02768	0.926446	0.987578	0.928857	0.946107	0.996506	1.07304	1.0319	0.919247	1.05064	0.835103	1.21094	0.994913	1.14191	1.05993	0.970057	1.00341	1.03738	0.93342
808	chr2	234100937	234655752	1.07176	1.08915	0.952276	0.979709	0.981474	1.17292	0.884175	0.9337	0.930903	1.04676	1.21094	1.00924	1.0023	0.821109	0.921548	0.915303	0.915303	0.876429	0.9996	0.9993	0.769357	1.02593	1.11997	0.946012	1.04081	0.99005	1.00441	1.02768	0.926446	0.987578	0.928857	0.946107	0.996506	1.07304	1.0319	0.919247	1.05064	0.835103	1.21094	0.994913	1.14191	1.05993	0.970057	1.00341	1.03738	0.93342
809	chr2	234655753	235196495	1.07176	1.08915	0.952276	0.979709	0.981474	1.17292	0.884175	0.9337	0.930903	1.04676	1.21094	1.00924	1.0023	1.04938	0.921548	0.915303	0.915303	0.876429	0.9996	0.9993	0.769357	1.02593	1.11997	0.946012	1.04081	0.99005	1.00441	1.02768	0.926446	0.987578	0.928857	0.946107	0.996506	1.07304	1.0319	0.919247	1.05064	0.835103	1.21094	0.994913	1.14191	1.05993	0.970057	1.00341	1.03738	0.93342
810	chr2	235196496	235733012	1.07176	1.08915	0.952276	0.979709	0.981474	1.17292	0.884175	0.9337	0.930903	1.04676	1.21094	1.00924	1.0023	1.04938	0.921548	0.915303	0.915303	0.876429	0.9996	0.9993	0.769357	1.02593	1.11997	0.946012	1.04081	0.99005	1.00441	1.02768	0.926446	0.987578	0.928857	0.946107	0.996506	1.07304	1.0319	0.919247	1.05064	0.835103	1.21094	0.994913	1.14191	1.05993	0.970057	1.00341	1.03738	0.93342
811	chr2	235733013	236251506	1.07176	1.08915	0.952276	0.979709	0.981474	1.17292	0.884175	0.9337	0.930903	1.04676	1.21094	1.00924	1.0023	1.04938	0.921548	0.915303	0.915303	0.876429	0.9996	0.9993	0.769357	1.02593	1.11997	0.946012	1.04081	0.99005	1.00441	1.02768	0.926446	0.987578	0.928857	0.946107	0.996506	1.07304	1.0319	0.919247	1.05064	0.835103	1.21094	0.994913	1.14191	1.05993	0.970057	1.00341	1.03738	0.93342
812	chr2	236251507	236771372	1.07176	1.08915	0.952276	0.979709	0.981474	1.17292	0.884175	0.9337	0.930903	1.04676	1.21094	1.00924	1.0023	1.04938	0.921548	0.915303	0.915303	0.876429	0.9996	0.9993	0.769357	1.02593	1.11997	0.946012	1.04081	0.99005	1.00441	1.02768	0.926446	0.987578	0.928857	0.946107	0.996506	1.07304	1.0319	0.919247	1.05064	0.835103	1.21094	0.994913	1.14191	1.05993	0.970057	1.00341	1.03738	0.93342
813	chr2	236771373	237286131	1.07176	1.08915	0.952276	0.979709	0.981474	1.17292	0.884175	0.9337	0.930903	1.04676	1.21094	1.00924	1.0023	1.04938	0.921548	0.915303	0.915303	0.876429	0.9996	0.9993	0.769357	1.02593	1.11997	0.946012	1.04081	0.99005	1.00441	1.02768	0.926446	0.987578	0.928857	0.946107	0.996506	1.07304	1.0319	0.919247	1.05064	0.835103	1.21094	0.994913	1.14191	1.05993	0.970057	1.00341	1.03738	0.93342
814	chr2	237286132	237813589	1.07176	1.08915	0.952276	0.979709	0.981474	1.17292	0.884175	0.9337	0.930903	1.04676	1.21094	1.00924	1.0023	1.04938	0.921548	0.915303	0.915303	0.876429	0.9996	0.9993	0.769357	1.02593	1.11997	0.946012	1.04081	0.99005	1.00441	1.02768	0.926446	0.987578	0.928857	0.946107	0.996506	1.07304	1.0319	0.919247	1.05064	0.835103	1.21094	0.994913	1.14191	1.05993	0.970057	1.00341	1.03738	0.93342
815	chr2	237813590	238314369	1.07176	1.08915	0.952276	0.979709	0.981474	1.17292	0.884175	0.9337	0.930903	1.04676	0.788834	1.00924	1.0023	1.04938	0.921548	0.915303	0.915303	0.876429	0.9996	0.9993	0.769357	1.02593	1.11997	0.946012	1.04081	0.99005	1.00441	1.02768	0.926446	0.987578	0.928857	0.946107	0.996506	1.07304	1.0319	0.919247	1.05064	0.835103	1.21094	0.994913	1.14191	1.05993	0.970057	1.00341	1.03738	0.93342
816	chr2	238314370	238823385	1.07176	1.08915	0.952276	0.979709	0.981474	1.17292	0.884175	0.9337	0.930903	1.04676	0.788834	1.00924	1.0023	1.04938	0.921548	0.915303	0.915303	0.876429	0.9996	0.9993	0.769357	1.02593	1.11997	0.946012	1.04081	0.99005	1.00441	1.02768	0.926446	0.987578	0.928857	0.946107	0.996506	1.07304	1.0319	0.919247	1.05064	0.835103	1.21094	0.994913	1.14191	1.05993	0.970057	1.00341	1.03738	0.93342
817	chr2	238823386	239387602	1.07176	1.08915	0.952276	0.979709	0.981474	1.17292	0.884175	0.9337	0.930903	1.04676	0.788834	1.00924	1.0023	1.04938	0.64908	0.915303	0.915303	0.876429	0.9996	0.9993	0.650965	1.02593	1.11997	0.946012	1.04081	0.99005	1.00441	1.02768	0.926446	0.987578	0.928857	0.946107	0.996506	1.07304	1.0319	0.919247	1.05064	0.835103	1.21094	0.994913	1.14191	1.05993	0.970057	1.00341	1.03738	0.93342
818	chr2	239387603	239938038	1.07176	1.08915	0.952276	0.979709	0.981474	1.17292	0.884175	0.9337	0.561693	1.04676	0.788834	1.00924	1.0023	1.04938	0.64908	0.915303	0.915303	0.876429	0.9996	0.9993	0.650965	1.02593	1.11997	0.946012	1.04081	0.99005	1.00441	1.02768	0.926446	0.987578	0.928857	0.946107	0.996506	1.07304	1.0319	0.919247	1.05064	0.835103	1.21094	0.994913	1.14191	1.05993	0.970057	1.00341	1.03738	0.93342
819	chr2	239938039	240435760	1.07176	1.08915	0.952276	0.979709	0.981474	1.17292	0.884175	0.9337	0.561693	1.04676	0.788834	1.00924	1.0023	1.04938	0.64908	0.915303	0.915303	0.876429	0.9996	0.9993	0.650965	1.02593	1.11997	0.946012	1.04081	0.99005	1.00441	1.02768	0.926446	0.987578	0.928857	0.946107	0.996506	1.07304	1.0319	0.919247	1.05064	0.835103	1.21094	0.994913	1.14191	1.05993	0.970057	1.00341	1.03738	0.93342
820	chr2	240435761	240977634	1.07176	1.08915	0.952276	0.979709	0.981474	1.17292	0.884175	0.9337	0.561693	1.04676	0.788834	1.00924	1.0023	1.04938	0.64908	0.915303	0.915303	0.876429	0.9996	0.9993	0.650965	1.02593	1.11997	0.946012	1.04081	0.99005	1.00441	1.02768	0.926446	0.987578	0.928857	0.946107	0.996506	1.07304	1.0319	0.919247	1.05064	0.835103	1.21094	0.994913	1.14191	1.05993	0.970057	1.00341	1.03738	0.93342
821	chr2	240977635	241524375	1.07176	1.08915	0.952276	0.979709	0.981474	1.17292	0.884175	0.9337	0.561693	1.04676	0.788834	1.00924	1.0023	1.04938	0.64908	0.915303	0.915303	0.876429	0.9996	0.9993	0.650965	1.02593	1.11997	0.946012	1.04081	0.99005	1.00441	1.02768	0.926446	0.987578	0.928857	0.946107	0.996506	1.07304	1.0319	0.919247	1.05064	0.835103	1.21094	0.994913	1.14191	1.05993	0.970057	1.00341	1.03738	0.93342
822	chr2	241524376	242067515	1.07176	1.08915	0.952276	0.979709	0.981474	1.17292	0.884175	0.9337	0.561693	1.04676	0.788834	1.00924	1.0023	1.04938	0.64908	0.915303	0.915303	0.876429	0.9996	0.9993	0.650965	1.02593	1.11997	0.946012	1.04081	0.99005	1.00441	1.02768	0.926446	0.987578	0.928857	0.946107	0.996506	1.07304	1.0319	0.919247	1.05064	0.835103	1.21094	0.994913	1.14191	1.05993	0.970057	1.00341	1.03738	0.93342
823	chr2	242067516	242612476	1.07176	1.08915	0.952276	0.979709	0.981474	1.17292	0.884175	0.9337	0.561693	1.04676	0.788834	1.00924	1.0023	1.04938	0.64908	0.915303	0.915303	0.876429	0.9996	0.9993	0.650965	1.02593	1.11997	0.946012	1.04081	0.99005	1.00441	1.02768	0.926446	0.987578	0.928857	0.946107	0.996506	1.07304	1.0319	0.919247	1.05064	0.835103	1.21094	0.994913	1.14191	1.05993	0.970057	1.00341	1.03738	0.93342
824	chr2	242612477	243199373	1.07176	1.08915	0.952276	0.979709	0.981474	1.17292	0.884175	0.9337	0.561693	1.04676	0.788834	1.00924	1.0023	1.04938	0.64908	0.915303	0.915303	0.876429	0.9996	0.9993	0.650965	1.02593	1.11997	0.946012	1.04081	0.99005	1.00441	1.02768	0.926446	0.987578	0.928857	0.946107	0.996506	1.07304	1.0319	0.919247	1.05064	0.835103	1.21094	0.994913	1.14191	1.05993	0.970057	1.00341	1.03738	0.93342
825	chr3	1	664580	0.988961	1.13758	1.67699	0.98334	1.08188	0.830689	1.05075	0.900415	1.0693	1.14008	1.16451	0.976481	1.03541	1.06769	1.1922	0.959541	1.04206	0.983144	0.88232	1.00511	1.20033	0.81302	1.11594	1.10727	1.00803	1.07778	1.02429	0.996207	1.03025	0.918512	1.32817	1.02829	0.973848	1.06332	0.995908	0.88091	0.935195	1.09801	1.24073	1.00965	0.897269	1.3704	1.03572	1.09812	1.0031	1.10418
826	chr3	664581	1304247	0.988961	1.13758	1.67699	0.98334	1.08188	0.830689	1.05075	0.900415	1.0693	1.14008	1.16451	0.976481	1.03541	1.06769	1.1922	0.959541	1.04206	0.983144	0.88232	1.00511	1.20033	0.81302	1.11594	1.10727	1.00803	1.07778	1.02429	0.996207	1.03025	0.918512	1.32817	1.02829	0.973848	1.06332	0.995908	0.88091	0.935195	1.09801	1.24073	1.00965	0.897269	1.3704	1.03572	1.09812	1.0031	1.10418
827	chr3	1304248	1944856	0.988961	1.13758	1.67699	0.98334	1.08188	0.830689	1.05075	0.900415	1.0693	1.14008	1.16451	0.976481	1.03541	1.06769	1.1922	0.959541	1.04206	0.983144	0.88232	1.00511	1.20033	0.81302	1.11594	1.10727	1.00803	1.07778	1.02429	0.996207	1.03025	0.918512	1.32817	1.02829	0.973848	1.06332	0.995908	0.88091	0.935195	1.09801	1.24073	1.00965	0.897269	1.3704	1.03572	1.09812	1.0031	1.10418
828	chr3	1944857	2583251	0.988961	1.13758	1.67699	0.98334	1.08188	0.830689	1.05075	0.900415	1.0693	1.14008	1.16451	0.976481	1.03541	1.06769	1.1922	0.959541	1.04206	0.983144	0.88232	1.00511	1.20033	0.81302	1.11594	1.10727	1.00803	1.07778	1.02429	0.996207	1.03025	0.918512	1.32817	1.02829	0.973848	1.06332	0.995908	0.88091	0.935195	1.09801	1.24073	1.00965	0.897269	1.3704	1.03572	1.09812	1.0031	1.10418
829	chr3	2583252	3163485	0.988961	1.13758	1.67699	0.98334	1.08188	0.830689	1.05075	0.900415	1.0693	1.14008	1.16451	0.976481	1.03541	1.06769	1.1922	0.959541	1.04206	0.983144	0.88232	1.00511	1.20033	0.81302	1.11594	1.10727	1.00803	1.07778	1.02429	0.996207	1.03025	0.918512	1.32817	1.02829	0.973848	1.06332	0.995908	0.88091	0.935195	1.09801	1.24073	1.00965	0.897269	1.3704	1.03572	1.09812	1.0031	1.10418
830	chr3	3163486	3744260	0.988961	1.13758	1.67699	0.98334	1.08188	0.830689	1.05075	0.900415	1.0693	1.14008	1.16451	0.976481	1.03541	1.06769	1.1922	0.959541	1.04206	0.983144	0.88232	1.00511	1.20033	0.81302	1.11594	1.10727	1.00803	1.07778	1.02429	0.996207	1.03025	0.918512	1.32817	1.02829	0.973848	1.06332	0.995908	0.88091	0.935195	1.09801	1.24073	1.00965	0.897269	1.3704	1.03572	1.09812	1.0031	1.10418
831	chr3	3744261	4364846	0.988961	1.13758	1.67699	0.98334	1.08188	0.830689	1.05075	0.900415	1.0693	1.14008	1.16451	0.976481	1.03541	1.06769	1.1922	0.959541	0.5585	0.983144	0.88232	1.00511	1.20033	0.81302	1.11594	1.10727	1.00803	1.07778	1.02429	0.996207	1.03025	0.918512	1.32817	1.02829	0.973848	1.06332	0.995908	0.88091	0.935195	1.09801	1.24073	1.00965	0.897269	1.3704	1.03572	1.09812	1.0031	1.10418
832	chr3	4364847	4902871	0.988961	1.13758	1.67699	0.98334	1.08188	0.830689	1.05075	0.900415	1.0693	1.14008	1.16451	0.976481	1.03541	1.06769	1.1922	0.959541	0.5585	0.983144	0.88232	1.00511	1.20033	0.81302	1.11594	1.10727	1.00803	1.07778	1.02429	0.996207	1.03025	0.918512	1.32817	1.02829	0.973848	1.06332	0.995908	0.88091	0.935195	1.09801	1.24073	1.00965	0.897269	1.3704	1.03572	1.09812	1.0031	1.10418
833	chr3	4902872	5474860	0.988961	1.13758	1.67699	0.98334	1.08188	0.830689	1.05075	0.900415	1.0693	1.14008	1.16451	0.976481	1.03541	1.06769	1.1922	0.959541	0.5585	0.983144	0.88232	1.00511	1.20033	0.81302	1.11594	1.10727	1.00803	1.07778	1.02429	0.996207	1.03025	0.918512	1.32817	1.02829	0.973848	1.06332	0.995908	0.88091	0.935195	1.09801	1.24073	1.00965	0.897269	1.3704	1.03572	1.09812	1.0031	1.10418
834	chr3	5474861	6095681	0.988961	1.13758	1.67699	0.98334	1.08188	0.830689	1.05075	0.900415	1.0693	0.794295	1.16451	0.976481	1.03541	1.06769	1.1922	0.959541	0.5585	0.983144	0.88232	1.00511	1.20033	0.81302	1.11594	1.10727	1.00803	1.07778	1.02429	0.996207	1.03025	0.918512	1.32817	1.02829	0.973848	1.06332	0.995908	0.88091	0.935195	1.09801	1.24073	1.00965	0.897269	1.3704	1.03572	1.09812	1.0031	1.10418
835	chr3	6095682	6747718	0.988961	1.13758	1.67699	0.98334	1.08188	0.830689	1.05075	0.900415	1.0693	0.794295	1.16451	0.976481	1.03541	1.06769	1.1922	0.959541	0.5585	0.983144	0.88232	1.00511	1.20033	0.81302	1.11594	1.10727	1.00803	1.07778	1.02429	0.996207	1.03025	0.918512	1.32817	1.02829	0.973848	1.06332	0.995908	0.88091	0.935195	1.09801	1.24073	1.00965	0.897269	1.3704	1.03572	1.09812	1.0031	1.10418
836	chr3	6747719	7374319	0.988961	1.13758	1.67699	0.98334	1.08188	0.830689	1.05075	0.900415	1.0693	0.794295	1.16451	0.976481	1.03541	1.06769	1.1922	0.959541	0.5585	0.983144	0.88232	1.00511	1.20033	0.81302	1.11594	1.10727	1.00803	1.07778	1.02429	0.996207	1.03025	0.918512	1.32817	1.02829	0.973848	1.06332	0.995908	0.88091	0.935195	1.09801	1.24073	1.00965	0.897269	1.3704	1.03572	1.09812	1.0031	1.10418
837	chr3	7374320	7969009	0.988961	1.13758	1.67699	0.98334	1.08188	0.830689	1.05075	0.900415	1.0693	0.794295	1.16451	0.976481	1.03541	1.06769	1.1922	0.959541	0.5585	0.983144	0.88232	1.00511	1.20033	0.81302	1.11594	1.10727	1.00803	1.07778	1.02429	0.996207	1.03025	0.918512	1.32817	1.02829	0.973848	1.06332	0.995908	0.88091	0.935195	1.09801	1.24073	1.00965	0.897269	1.3704	1.03572	1.09812	1.0031	1.10418
838	chr3	7969010	8546789	0.988961	1.13758	1.67699	0.98334	1.08188	0.830689	1.05075	0.900415	1.0693	0.794295	1.16451	0.976481	1.03541	1.06769	1.1922	0.959541	0.5585	0.983144	0.88232	1.00511	1.20033	1.05243	1.11594	1.10727	1.00803	1.07778	1.02429	0.996207	1.03025	0.918512	1.32817	1.02829	0.973848	1.06332	0.995908	0.88091	0.935195	1.09801	1.24073	1.00965	0.897269	1.3704	1.03572	1.09812	1.0031	1.10418
839	chr3	8546790	9067456	0.988961	1.13758	1.67699	0.98334	1.08188	0.830689	1.05075	0.900415	1.0693	0.794295	1.16451	0.976481	1.03541	1.06769	1.1922	0.959541	0.5585	0.983144	0.88232	1.00511	1.20033	1.05243	1.11594	1.10727	1.00803	1.07778	1.02429	0.996207	1.03025	0.918512	1.0822	1.02829	0.973848	1.06332	0.995908	0.88091	0.935195	1.09801	1.24073	1.00965	0.897269	1.3704	1.03572	1.09812	1.0031	1.10418
840	chr3	9067457	9612225	0.988961	1.13758	1.67699	0.98334	1.08188	0.830689	1.05075	0.900415	1.0693	0.794295	1.16451	0.976481	1.03541	1.06769	1.1922	0.959541	1.00864	0.983144	0.88232	1.00511	1.20033	1.05243	1.11594	1.10727	1.00803	1.07778	1.02429	0.996207	1.03025	0.918512	1.0822	1.02829	0.973848	1.06332	0.995908	0.88091	0.935195	1.09801	1.24073	1.00965	0.897269	1.3704	1.03572	1.09812	1.0031	1.10418
841	chr3	9612226	10156806	0.988961	1.13758	1.67699	0.98334	1.08188	0.830689	1.05075	0.900415	1.0693	0.794295	1.16451	0.976481	1.03541	1.06769	1.1922	0.959541	1.00864	0.983144	0.88232	1.00511	1.20033	1.05243	1.11594	1.10727	1.00803	1.07778	1.02429	0.996207	1.03025	0.918512	1.0822	1.02829	0.973848	1.06332	0.995908	0.88091	0.935195	1.09801	1.24073	1.00965	0.897269	1.3704	1.03572	1.09812	1.0031	1.10418
842	chr3	10156807	10660631	0.988961	1.13758	1.67699	0.98334	1.08188	0.830689	1.05075	0.900415	1.0693	0.794295	1.16451	0.976481	1.03541	1.06769	1.1922	0.959541	1.00864	0.983144	0.88232	1.00511	0.904476	1.05243	1.11594	1.10727	1.00803	1.07778	1.02429	0.996207	1.03025	0.918512	1.0822	1.02829	0.973848	1.06332	0.995908	0.88091	0.935195	1.09801	1.24073	1.00965	0.897269	1.3704	1.03572	1.09812	1.0031	1.10418
843	chr3	10660632	11160883	0.988961	1.13758	1.67699	0.98334	1.08188	0.830689	1.05075	0.900415	1.0693	0.794295	1.16451	0.976481	1.03541	1.06769	1.1922	0.959541	1.00864	0.983144	0.88232	1.00511	0.904476	1.05243	1.11594	1.10727	1.00803	1.07778	1.02429	0.996207	1.03025	0.918512	1.0822	1.02829	0.973848	1.06332	0.995908	0.88091	0.935195	1.09801	1.24073	1.00965	0.897269	1.3704	1.03572	1.09812	1.0031	1.10418
844	chr3	11160884	11701272	0.988961	1.13758	1.67699	0.98334	1.08188	0.830689	1.05075	0.900415	1.0693	0.794295	1.16451	0.976481	1.03541	1.06769	1.1922	0.959541	1.00864	0.983144	0.88232	1.00511	0.904476	1.05243	1.11594	1.10727	1.00803	1.07778	1.02429	0.996207	1.03025	0.918512	1.0822	1.02829	0.973848	1.06332	0.995908	0.88091	0.935195	1.09801	1.24073	1.00965	0.897269	1.3704	1.03572	1.09812	1.0031	1.10418
845	chr3	11701273	12267874	0.988961	1.13758	1.67699	0.98334	1.08188	0.830689	1.05075	0.900415	1.0693	0.794295	1.16451	0.976481	1.03541	1.06769	1.1922	0.959541	1.00864	0.983144	0.88232	1.00511	0.904476	1.05243	1.11594	1.10727	1.00803	1.07778	1.02429	0.996207	1.03025	0.918512	1.0822	1.02829	0.973848	1.06332	0.995908	0.88091	0.935195	1.09801	1.24073	1.00965	0.897269	1.3704	1.03572	1.09812	1.0031	1.10418
846	chr3	12267875	12824690	0.988961	1.13758	1.67699	0.98334	1.08188	0.830689	1.05075	0.900415	1.0693	0.794295	1.16451	0.976481	1.03541	1.06769	1.1922	0.959541	1.00864	0.983144	0.88232	1.00511	0.904476	1.05243	1.11594	1.10727	1.00803	1.07778	1.02429	0.996207	1.03025	0.918512	1.0822	1.02829	0.973848	1.06332	0.995908	0.88091	0.935195	1.09801	1.24073	1.00965	0.897269	1.3704	1.03572	1.09812	1.0031	1.10418
847	chr3	12824691	13329740	0.988961	1.13758	1.67699	0.98334	1.08188	0.830689	1.05075	0.900415	1.0693	0.794295	1.16451	0.976481	1.03541	1.06769	1.1922	0.959541	1.00864	1.23689	0.88232	1.00511	0.904476	1.05243	1.11594	1.10727	1.00803	1.07778	1.02429	0.996207	1.03025	0.722311	1.0822	1.02829	0.973848	1.06332	0.995908	0.88091	0.935195	1.09801	1.24073	1.00965	0.897269	1.3704	1.03572	1.09812	1.0031	1.10418
848	chr3	13329741	13841545	0.988961	1.13758	1.67699	0.98334	1.08188	0.830689	1.05075	0.900415	1.0693	0.794295	1.16451	0.976481	1.03541	1.06769	1.1922	0.959541	1.00864	1.23689	0.88232	1.00511	1.10838	1.05243	1.11594	1.10727	1.00803	1.07778	1.02429	0.996207	1.03025	0.722311	1.0822	1.02829	0.973848	1.06332	0.995908	0.88091	0.935195	1.09801	1.24073	1.00965	0.897269	1.3704	1.03572	1.09812	1.0031	1.10418
849	chr3	13841546	14388560	0.988961	1.13758	1.67699	0.98334	1.08188	0.830689	1.05075	0.900415	1.0693	0.794295	1.16451	0.976481	1.03541	1.06769	1.1922	0.959541	1.00864	1.23689	0.88232	1.00511	1.10838	1.05243	1.11594	1.10727	1.00803	1.07778	1.02429	0.996207	1.03025	0.722311	1.0822	1.02829	0.973848	1.06332	0.995908	0.88091	0.935195	1.09801	1.24073	1.00965	0.897269	1.3704	1.03572	1.09812	1.0031	1.10418
850	chr3	14388561	14888348	0.988961	1.13758	1.67699	0.98334	1.08188	0.830689	1.05075	0.900415	1.0693	0.794295	1.16451	0.976481	1.03541	1.06769	1.1922	0.959541	1.00864	1.23689	0.88232	1.00511	1.10838	1.05243	1.11594	1.10727	1.00803	1.07778	1.02429	0.996207	1.03025	0.722311	1.0822	1.02829	0.973848	1.06332	0.995908	0.88091	0.935195	1.09801	1.24073	1.00965	0.897269	1.0014	1.03572	1.09812	1.0031	1.10418
851	chr3	14888349	15420259	0.988961	1.13758	1.67699	0.98334	1.08188	0.830689	1.05075	0.900415	1.0693	0.794295	1.16451	0.976481	1.03541	1.06769	1.1922	0.959541	1.00864	1.23689	0.88232	1.00511	1.10838	1.05243	1.11594	1.10727	1.00803	1.07778	1.02429	0.996207	1.03025	0.722311	1.0822	1.02829	0.973848	1.06332	0.995908	0.88091	0.935195	1.09801	1.24073	1.00965	0.897269	1.0014	1.03572	1.09812	1.0031	1.10418
852	chr3	15420260	15973454	0.988961	1.13758	1.67699	0.98334	1.08188	0.830689	1.05075	0.900415	1.0693	0.794295	1.16451	0.976481	1.03541	1.06769	1.1922	0.959541	1.00864	1.23689	0.88232	1.00511	1.10838	1.05243	1.11594	1.10727	1.00803	1.07778	1.02429	0.996207	1.03025	0.722311	1.0822	1.02829	0.973848	1.06332	0.995908	0.88091	0.935195	1.09801	1.24073	1.00965	0.897269	1.0014	1.03572	1.09812	1.0031	1.10418
853	chr3	15973455	16482719	0.988961	1.13758	1.67699	0.98334	1.08188	0.830689	1.05075	0.900415	1.0693	0.794295	1.16451	0.976481	1.03541	1.06769	1.1922	0.959541	1.00864	1.23689	0.88232	1.00511	1.10838	1.05243	1.11594	1.10727	1.00803	1.07778	1.02429	0.996207	1.03025	0.722311	1.0822	1.02829	0.973848	1.06332	0.995908	0.88091	0.935195	1.09801	1.24073	1.00965	0.897269	1.0014	1.03572	1.09812	1.0031	1.10418
854	chr3	16482720	17033660	0.988961	1.13758	1.67699	0.98334	1.08188	0.830689	1.05075	0.900415	1.0693	0.794295	1.16451	0.976481	1.03541	1.06769	1.1922	0.959541	1.00864	0.899245	0.88232	1.00511	1.10838	1.05243	1.11594	1.10727	1.00803	1.07778	1.02429	0.996207	1.03025	0.899695	1.0822	1.02829	0.973848	1.06332	0.995908	0.88091	0.935195	1.09801	1.24073	1.00965	0.897269	1.0014	1.03572	1.09812	1.0031	0.758585
855	chr3	17033661	17612527	0.988961	1.13758	1.67699	0.98334	1.08188	0.830689	1.05075	0.900415	1.0693	0.794295	1.16451	0.976481	1.03541	0.521211	1.1922	0.959541	1.00864	0.899245	0.88232	1.00511	1.10838	1.05243	1.11594	1.10727	1.00803	1.07778	1.02429	0.996207	1.03025	0.899695	1.0822	1.02829	0.973848	1.06332	0.995908	0.88091	0.935195	1.09801	1.24073	1.00965	0.897269	0.635972	1.03572	1.09812	1.0031	0.758585
856	chr3	17612528	18199498	0.544167	0.617671	1.67699	0.98334	0.506364	0.387515	0.531103	0.480754	1.0693	0.794295	1.16451	0.420168	1.03541	0.521211	1.1922	0.532059	0.646294	0.599655	0.88232	1.00511	0.667444	1.05243	0.600255	0.651225	1.00803	1.07778	0.513503	0.996207	0.471989	0.899695	0.518249	1.02829	0.973848	0.545256	0.511555	0.427671	0.935195	0.547332	0.632611	1.00965	0.897269	0.635972	1.03572	1.09812	1.0031	0.758585
857	chr3	18199499	18769694	0.544167	0.617671	1.67699	0.98334	0.506364	0.387515	0.531103	0.480754	1.0693	0.794295	0.591023	0.420168	1.03541	0.521211	1.1922	0.532059	0.646294	0.599655	0.88232	1.00511	0.667444	1.05243	0.600255	0.651225	1.00803	1.07778	0.513503	0.996207	0.471989	0.899695	0.518249	1.02829	0.973848	0.545256	0.511555	0.427671	0.935195	0.547332	0.632611	1.00965	0.897269	0.635972	1.03572	1.09812	1.0031	0.758585
858	chr3	18769695	19404742	0.544167	0.617671	0.661795	0.98334	0.506364	0.387515	0.531103	0.480754	1.0693	0.794295	0.591023	0.420168	1.03541	0.521211	1.1922	0.532059	0.646294	0.599655	0.88232	1.00511	0.667444	1.05243	0.600255	0.651225	1.00803	1.07778	0.513503	0.996207	0.471989	0.899695	0.518249	1.02829	0.973848	0.545256	0.511555	0.427671	0.935195	0.547332	0.632611	1.00965	0.897269	0.635972	1.03572	1.09812	1.0031	0.758585
859	chr3	19404743	20054714	0.544167	0.617671	0.661795	0.98334	0.506364	0.387515	0.531103	0.480754	1.0693	0.794295	0.591023	0.420168	1.03541	0.521211	1.1922	0.532059	0.646294	0.599655	0.88232	1.00511	0.667444	1.05243	0.600255	0.651225	1.00803	1.07778	0.513503	0.996207	0.471989	0.899695	0.518249	1.02829	0.973848	0.545256	0.511555	0.427671	0.935195	0.547332	0.632611	1.00965	0.897269	0.635972	1.03572	1.09812	1.0031	0.758585
860	chr3	20054715	20656821	0.544167	0.617671	0.661795	0.98334	0.506364	0.387515	0.531103	0.480754	1.0693	0.794295	0.591023	0.420168	1.03541	0.521211	1.1922	0.532059	0.646294	0.599655	0.88232	1.00511	0.667444	1.05243	0.600255	0.651225	1.00803	1.07778	0.513503	0.996207	0.471989	0.899695	0.518249	1.02829	0.973848	0.545256	0.511555	0.427671	0.935195	0.547332	0.632611	1.00965	0.897269	0.635972	1.03572	1.09812	1.0031	0.758585
861	chr3	20656822	21281199	0.544167	0.617671	0.661795	0.98334	0.506364	0.387515	0.531103	0.480754	1.0693	0.794295	0.591023	0.420168	1.03541	0.521211	1.1922	0.532059	0.646294	0.599655	0.88232	1.00511	0.667444	1.05243	0.600255	0.651225	1.00803	1.07778	0.513503	0.996207	0.471989	0.899695	0.518249	1.02829	0.973848	0.545256	0.511555	0.427671	0.935195	0.547332	0.632611	1.00965	0.897269	0.635972	1.03572	1.09812	1.0031	0.758585
862	chr3	21281200	21873979	0.544167	0.617671	0.661795	0.98334	0.506364	0.387515	0.531103	0.480754	1.0693	0.794295	0.591023	0.420168	1.03541	0.521211	1.1922	0.532059	0.646294	0.599655	0.88232	1.00511	0.667444	1.05243	0.600255	0.651225	1.00803	1.07778	0.513503	0.996207	0.471989	0.899695	0.518249	1.02829	0.973848	0.545256	0.511555	0.427671	0.935195	0.547332	0.632611	1.00965	0.897269	0.635972	1.03572	1.09812	1.0031	0.758585
863	chr3	21873980	22486457	0.544167	0.617671	0.661795	0.98334	0.506364	0.387515	0.531103	0.480754	1.0693	0.794295	0.591023	0.420168	1.03541	0.521211	1.1922	0.532059	0.646294	0.599655	0.88232	0.859418	0.667444	1.05243	0.600255	0.651225	1.00803	1.07778	0.513503	0.996207	0.471989	0.899695	0.518249	1.02829	0.973848	0.545256	0.511555	0.427671	0.935195	0.547332	0.632611	1.00965	0.897269	0.3427	1.03572	1.09812	1.0031	0.758585
864	chr3	22486458	23112838	0.544167	0.617671	0.661795	0.98334	0.506364	0.387515	0.531103	0.480754	1.0693	0.794295	0.591023	0.420168	1.03541	0.521211	1.1922	0.532059	0.646294	0.599655	0.88232	0.859418	0.667444	1.05243	0.600255	0.651225	1.00803	1.07778	0.513503	0.996207	0.471989	0.899695	0.518249	1.02829	0.973848	0.545256	0.511555	0.427671	0.935195	0.547332	0.632611	1.00965	0.897269	0.3427	1.03572	1.09812	1.0031	0.758585
865	chr3	23112839	23689971	0.544167	0.329559	0.661795	0.98334	0.506364	0.387515	0.531103	0.480754	1.0693	0.794295	0.591023	0.420168	1.03541	0.521211	0.888785	0.532059	0.646294	0.444058	0.88232	0.859418	0.667444	1.05243	0.600255	0.651225	1.00803	1.07778	0.513503	0.996207	0.471989	0.899695	0.518249	1.02829	0.973848	0.545256	0.511555	0.427671	0.935195	0.282663	0.632611	1.00965	0.897269	0.3427	1.03572	1.09812	1.0031	0.758585
866	chr3	23689972	24242283	0.544167	0.329559	0.661795	0.98334	0.506364	0.387515	0.531103	0.480754	1.0693	0.794295	0.591023	0.420168	1.03541	0.521211	0.888785	0.532059	0.646294	0.444058	0.88232	0.859418	0.667444	1.05243	0.600255	0.651225	1.00803	1.07778	0.513503	0.996207	0.471989	0.899695	0.518249	1.02829	0.973848	0.545256	0.511555	0.427671	0.935195	0.282663	0.632611	1.00965	0.897269	0.3427	1.03572	1.09812	1.0031	0.758585
867	chr3	24242284	24803087	0.544167	0.329559	0.661795	0.98334	0.506364	0.387515	0.531103	0.480754	1.0693	0.794295	0.591023	0.420168	1.03541	0.521211	0.888785	0.532059	0.646294	0.444058	0.88232	0.859418	0.667444	1.05243	0.600255	0.651225	1.00803	1.07778	0.513503	0.996207	0.471989	0.899695	0.518249	1.02829	0.973848	0.545256	0.511555	0.427671	0.935195	0.282663	0.632611	1.00965	0.897269	0.3427	1.03572	1.09812	1.0031	0.758585
868	chr3	24803088	25384262	0.544167	0.329559	0.661795	0.98334	0.506364	0.387515	0.531103	0.480754	1.0693	0.794295	0.591023	0.420168	1.03541	0.521211	0.888785	0.532059	0.646294	0.444058	0.88232	0.859418	0.667444	1.05243	0.600255	0.651225	1.00803	1.07778	0.513503	0.996207	0.471989	0.899695	0.518249	1.02829	0.973848	0.545256	0.511555	0.427671	0.935195	0.282663	0.632611	1.00965	0.897269	0.3427	1.03572	1.09812	1.0031	0.758585
869	chr3	25384263	25919453	0.544167	0.329559	0.661795	0.98334	0.506364	0.387515	0.531103	0.480754	1.0693	0.794295	0.591023	0.420168	1.03541	0.521211	0.888785	0.532059	0.646294	0.444058	0.88232	0.859418	0.667444	1.05243	0.600255	0.651225	1.00803	1.07778	0.513503	0.996207	0.471989	0.899695	0.518249	1.02829	0.973848	0.545256	0.511555	0.427671	0.935195	0.282663	0.632611	1.00965	0.897269	0.3427	1.03572	1.09812	1.0031	0.758585
870	chr3	25919454	26522699	0.544167	0.329559	0.661795	0.98334	0.506364	0.387515	0.531103	0.480754	1.0693	0.794295	0.591023	0.420168	1.03541	0.521211	0.888785	0.532059	0.646294	0.444058	0.88232	0.859418	0.667444	1.05243	0.600255	0.651225	1.00803	1.07778	0.513503	0.996207	0.471989	0.899695	0.518249	1.02829	0.973848	0.545256	0.511555	0.427671	0.935195	0.282663	0.632611	1.00965	0.897269	0.3427	1.03572	1.09812	1.0031	0.758585
871	chr3	26522700	27126398	0.544167	0.329559	0.661795	0.98334	0.506364	0.387515	0.531103	0.480754	1.0693	0.794295	0.591023	0.420168	1.03541	0.521211	0.888785	0.532059	0.397484	0.444058	0.88232	0.859418	0.667444	1.05243	0.600255	0.651225	1.00803	1.07778	0.513503	0.996207	0.471989	0.899695	0.518249	1.02829	0.973848	0.545256	0.511555	0.427671	0.935195	0.282663	0.632611	1.00965	0.897269	0.3427	1.03572	1.09812	1.0031	0.758585
872	chr3	27126399	27702608	0.544167	0.329559	0.661795	0.98334	0.506364	0.387515	0.531103	0.480754	1.0693	0.794295	0.591023	0.420168	1.03541	0.521211	1.12199	0.532059	0.397484	0.444058	0.88232	0.859418	0.667444	1.05243	0.600255	0.651225	1.00803	1.07778	0.513503	0.996207	0.471989	0.899695	0.518249	1.02829	0.973848	0.545256	0.511555	0.427671	0.935195	0.282663	0.632611	1.00965	0.897269	0.3427	1.03572	1.09812	1.0031	0.758585
873	chr3	27702609	28309106	0.544167	0.329559	0.661795	0.98334	0.506364	0.387515	0.531103	0.480754	1.0693	0.794295	0.591023	0.420168	1.03541	0.521211	1.12199	0.532059	0.397484	0.444058	0.88232	0.859418	0.667444	1.05243	0.600255	0.651225	1.00803	1.07778	0.513503	0.996207	0.471989	0.899695	0.518249	1.02829	0.973848	0.545256	0.511555	0.427671	0.935195	0.282663	0.632611	1.00965	0.897269	0.3427	1.03572	1.09812	1.0031	0.758585
874	chr3	28309107	28896702	0.544167	0.329559	0.661795	0.98334	0.506364	0.387515	0.531103	0.480754	1.0693	0.794295	0.591023	0.420168	1.03541	0.521211	1.12199	0.532059	0.397484	0.444058	0.88232	0.859418	0.667444	1.05243	0.600255	0.651225	1.00803	1.07778	0.513503	0.996207	0.471989	0.899695	0.518249	1.02829	0.973848	0.545256	0.511555	0.427671	0.935195	0.282663	0.632611	1.00965	0.897269	0.3427	1.03572	1.09812	1.0031	0.758585
875	chr3	28896703	29459724	0.544167	0.329559	0.661795	0.98334	0.506364	0.387515	0.531103	0.480754	1.0693	0.794295	0.591023	0.420168	1.03541	0.521211	1.12199	0.532059	0.397484	0.444058	0.88232	0.859418	0.667444	1.05243	0.600255	0.651225	1.00803	1.07778	0.513503	0.996207	0.471989	0.899695	0.518249	1.02829	0.973848	0.545256	0.511555	0.427671	0.935195	0.282663	0.632611	1.00965	0.897269	0.15142	1.03572	1.09812	1.0031	0.758585
876	chr3	29459725	30048496	0.544167	0.329559	0.661795	0.98334	0.506364	0.387515	0.531103	0.480754	1.0693	0.794295	0.591023	0.420168	1.03541	0.521211	1.12199	0.532059	0.397484	0.444058	0.88232	0.859418	0.667444	1.05243	1.09122	0.651225	1.00803	1.07778	0.513503	0.996207	0.471989	0.899695	0.518249	1.02829	0.973848	0.545256	0.511555	0.427671	0.935195	0.282663	0.632611	1.00965	0.897269	0.15142	1.03572	1.09812	1.0031	0.758585
877	chr3	30048497	30618875	0.544167	0.329559	0.661795	0.98334	0.506364	0.387515	0.531103	0.480754	1.0693	0.794295	0.591023	0.420168	1.03541	0.521211	1.12199	0.532059	0.397484	0.444058	0.88232	0.859418	0.667444	1.05243	1.09122	0.651225	1.00803	1.07778	0.513503	0.996207	0.471989	0.899695	0.518249	1.02829	0.973848	0.545256	0.511555	0.427671	0.935195	0.282663	0.632611	1.00965	0.897269	0.15142	1.03572	1.09812	1.0031	0.758585
878	chr3	30618876	31160569	0.544167	0.329559	0.661795	0.98334	0.506364	0.387515	0.531103	0.480754	1.0693	0.794295	0.591023	0.420168	1.03541	0.521211	1.12199	0.532059	0.397484	0.444058	0.88232	0.859418	0.667444	1.05243	1.09122	0.651225	1.00803	1.07778	0.513503	0.996207	0.471989	0.899695	0.518249	1.02829	0.973848	0.545256	0.511555	0.427671	0.935195	0.282663	0.632611	1.00965	0.897269	0.15142	1.03572	1.09812	1.0031	0.758585
879	chr3	31160570	31715065	0.544167	0.329559	0.661795	0.98334	0.506364	0.387515	0.531103	0.480754	1.0693	0.794295	0.591023	0.420168	1.03541	0.521211	1.12199	0.532059	0.397484	0.444058	0.88232	0.859418	0.667444	1.05243	1.09122	0.651225	1.00803	1.07778	0.513503	0.996207	0.471989	0.899695	0.518249	1.02829	0.973848	0.545256	0.511555	0.427671	0.935195	0.282663	0.632611	1.00965	0.897269	0.15142	1.03572	1.09812	1.0031	0.758585
880	chr3	31715066	32283210	0.544167	0.329559	0.661795	0.98334	0.506364	0.387515	0.531103	0.480754	1.0693	0.794295	0.591023	0.420168	1.03541	0.521211	1.12199	0.532059	0.397484	0.444058	0.88232	0.859418	0.667444	1.05243	1.09122	0.651225	1.00803	1.07778	0.513503	0.996207	0.471989	0.899695	0.518249	1.02829	0.973848	0.545256	0.511555	0.427671	0.935195	0.282663	0.632611	1.00965	0.897269	0.15142	1.03572	1.09812	1.0031	0.758585
881	chr3	32283211	32860997	0.544167	0.329559	0.661795	0.98334	0.506364	0.387515	0.531103	0.914205	1.0693	0.794295	0.591023	0.420168	1.03541	0.521211	1.12199	0.532059	0.397484	0.444058	0.88232	0.859418	0.667444	1.05243	1.09122	0.651225	1.00803	1.07778	0.513503	0.996207	0.471989	0.899695	0.518249	1.02829	0.973848	0.545256	0.511555	0.427671	0.935195	0.282663	0.632611	1.00965	0.897269	0.15142	1.03572	1.09812	1.0031	0.758585
882	chr3	32860998	33436127	0.544167	0.329559	0.661795	0.98334	0.506364	0.387515	0.531103	0.914205	1.0693	0.794295	0.591023	0.420168	1.03541	0.521211	1.12199	0.532059	0.397484	0.444058	0.88232	0.859418	0.667444	1.05243	1.09122	0.651225	1.00803	1.07778	0.513503	0.996207	0.471989	1.05106	0.518249	1.02829	0.973848	0.545256	0.511555	0.427671	0.935195	0.282663	0.632611	1.00965	0.897269	0.15142	1.03572	1.09812	1.0031	0.758585
883	chr3	33436128	34031680	0.544167	0.329559	1.58709	0.98334	0.506364	0.387515	0.531103	0.914205	1.0693	0.794295	0.591023	0.951039	1.03541	1.01481	1.12199	0.532059	0.831104	0.444058	0.88232	0.859418	0.667444	1.05243	1.09122	0.651225	1.00803	1.07778	1.01227	0.996207	0.471989	1.05106	0.518249	1.02829	0.973848	0.545256	0.511555	0.427671	0.935195	0.282663	0.632611	1.00965	0.897269	0.15142	1.03572	1.09812	1.0031	0.758585
884	chr3	34031681	34615225	1.0248	0.860106	1.58709	0.98334	1.01613	0.387515	0.990842	0.914205	1.0693	1.16661	1.29602	0.951039	1.03541	1.01481	1.12199	0.931555	0.831104	1.01126	0.88232	0.859418	1.05159	1.05243	1.09122	1.16614	1.00803	1.07778	1.01227	0.996207	1.04019	1.05106	1.16591	1.02829	0.973848	1.02398	0.990149	0.919707	0.935195	0.787336	0.632611	1.00965	0.897269	0.694961	1.03572	1.09812	1.0031	1.1788
885	chr3	34615226	35261961	1.0248	0.860106	1.58709	0.98334	1.01613	0.387515	0.990842	0.914205	1.0693	1.16661	1.29602	0.951039	1.03541	1.01481	1.12199	0.931555	0.831104	1.01126	0.88232	0.859418	1.05159	1.05243	1.09122	1.16614	1.00803	1.07778	1.01227	0.996207	1.04019	1.05106	1.16591	1.02829	0.973848	1.02398	0.990149	0.919707	0.935195	0.787336	1.19806	1.00965	0.897269	0.694961	1.03572	1.09812	1.0031	1.1788
886	chr3	35261962	35898526	1.0248	0.860106	1.58709	0.98334	1.01613	0.844678	0.990842	0.914205	1.0693	1.16661	1.29602	0.951039	1.03541	1.01481	1.12199	0.931555	0.831104	1.01126	0.88232	0.859418	1.05159	1.05243	1.09122	1.16614	1.00803	1.07778	1.01227	0.996207	1.04019	1.05106	1.16591	1.02829	0.973848	1.02398	0.990149	0.919707	0.935195	0.787336	1.19806	1.00965	0.897269	0.694961	1.03572	1.09812	1.0031	1.1788
887	chr3	35898527	36503142	1.0248	0.860106	1.58709	0.98334	1.01613	0.844678	0.990842	0.914205	1.0693	1.16661	1.29602	0.951039	1.03541	1.01481	1.12199	0.931555	0.831104	1.01126	0.88232	0.859418	1.05159	1.05243	1.09122	1.16614	1.00803	1.07778	1.01227	0.996207	1.04019	1.05106	1.16591	1.02829	0.973848	1.02398	0.990149	0.919707	0.935195	0.787336	1.19806	1.00965	0.897269	0.694961	1.03572	1.09812	1.0031	1.1788
888	chr3	36503143	37064668	1.0248	0.860106	1.58709	0.98334	1.01613	0.844678	0.990842	0.914205	1.0693	1.16661	1.01654	0.951039	1.03541	1.01481	1.37768	0.931555	0.831104	1.01126	0.88232	0.859418	1.05159	1.05243	1.09122	1.16614	1.00803	1.07778	1.01227	0.996207	1.04019	1.05106	1.16591	1.02829	0.973848	1.02398	0.990149	0.919707	0.935195	0.787336	1.19806	1.00965	0.897269	0.694961	1.03572	1.09812	1.0031	1.1788
889	chr3	37064669	37616422	1.0248	0.860106	1.58709	0.98334	1.01613	0.844678	0.990842	0.914205	1.0693	1.16661	1.01654	0.951039	1.03541	1.01481	1.37768	0.931555	0.831104	1.01126	0.88232	1.00471	1.05159	1.05243	1.09122	1.16614	1.00803	1.07778	1.01227	0.996207	1.04019	1.05106	1.16591	1.02829	0.973848	1.02398	0.990149	0.919707	0.935195	0.787336	1.19806	1.00965	0.897269	0.694961	1.03572	1.09812	1.0031	1.1788
890	chr3	37616423	38137754	1.0248	0.860106	1.58709	0.98334	1.01613	0.844678	0.990842	0.914205	1.0693	1.16661	1.01654	0.951039	1.03541	1.01481	1.37768	0.931555	0.831104	1.01126	0.88232	1.00471	1.21604	1.05243	1.09122	1.16614	1.00803	1.07778	1.01227	0.996207	1.04019	1.05106	1.16591	1.02829	0.973848	1.02398	0.990149	0.919707	0.935195	0.787336	1.19806	1.00965	0.897269	0.694961	1.03572	1.09812	1.0031	1.1788
891	chr3	38137755	38666093	1.0248	0.860106	1.58709	0.98334	1.01613	0.844678	0.990842	0.914205	1.0693	1.16661	1.01654	0.951039	1.03541	1.01481	1.37768	0.931555	0.831104	1.01126	0.88232	1.00471	1.21604	1.05243	1.09122	1.16614	1.00803	1.07778	1.01227	0.996207	1.04019	1.05106	1.16591	1.02829	0.973848	1.02398	0.990149	0.919707	0.935195	0.787336	1.19806	1.00965	0.897269	0.694961	1.03572	1.09812	1.0031	1.1788
892	chr3	38666094	39209937	1.0248	0.860106	1.58709	0.98334	1.01613	0.844678	0.990842	0.914205	1.0693	1.16661	1.01654	0.951039	1.03541	1.01481	1.37768	0.931555	0.831104	1.01126	0.88232	1.00471	1.21604	1.05243	1.09122	1.16614	1.00803	1.07778	1.01227	0.996207	1.04019	1.05106	1.16591	1.02829	0.973848	1.02398	0.990149	0.919707	0.935195	0.787336	1.19806	1.00965	0.897269	0.694961	1.03572	1.09812	1.0031	1.1788
893	chr3	39209938	39808083	1.0248	0.860106	1.58709	0.98334	1.01613	0.844678	0.990842	0.914205	1.0693	1.16661	1.01654	0.951039	1.03541	1.01481	1.37768	0.931555	0.831104	1.01126	0.88232	1.00471	1.21604	1.05243	1.09122	1.16614	1.00803	1.07778	1.01227	0.996207	1.04019	1.05106	1.16591	1.02829	0.973848	1.02398	0.990149	0.919707	0.935195	0.787336	1.19806	1.00965	0.897269	0.694961	1.03572	1.09812	1.0031	1.1788
894	chr3	39808084	40389384	1.0248	0.860106	1.58709	0.98334	1.01613	0.844678	0.990842	0.914205	1.0693	0.936224	1.01654	0.951039	1.03541	1.01481	1.37768	0.931555	1.15754	1.01126	0.88232	1.00471	1.21604	1.05243	1.09122	1.16614	1.00803	1.07778	1.01227	0.996207	1.04019	1.05106	1.16591	1.02829	0.973848	1.02398	0.990149	0.919707	0.935195	0.787336	1.19806	1.00965	0.897269	0.694961	1.03572	1.09812	1.0031	1.1788
895	chr3	40389385	40927082	1.0248	0.860106	1.58709	0.98334	1.01613	0.844678	0.990842	0.914205	1.0693	0.936224	1.01654	0.951039	1.03541	1.01481	1.37768	0.931555	1.15754	1.01126	0.88232	1.00471	1.21604	1.05243	1.09122	1.16614	1.00803	1.07778	1.01227	0.996207	1.04019	1.05106	1.16591	1.02829	0.973848	1.02398	0.990149	0.919707	0.935195	0.787336	1.19806	1.00965	0.897269	0.694961	1.03572	1.09812	1.0031	1.1788
896	chr3	40927083	41473589	1.0248	0.860106	1.58709	0.98334	1.01613	0.844678	0.990842	0.914205	1.0693	0.936224	1.01654	0.951039	1.03541	1.01481	1.37768	0.931555	1.15754	1.01126	0.88232	1.00471	1.21604	1.05243	1.09122	1.16614	1.00803	1.07778	1.01227	0.996207	1.04019	1.05106	1.16591	1.02829	0.973848	1.02398	0.990149	0.919707	0.935195	0.787336	1.19806	1.00965	0.897269	0.694961	1.03572	1.09812	1.0031	1.1788
897	chr3	41473590	42083973	1.0248	0.860106	1.58709	0.98334	1.01613	0.844678	0.990842	0.914205	1.0693	0.936224	1.01654	0.951039	1.03541	1.01481	1.37768	0.931555	1.15754	1.01126	0.88232	1.00471	1.21604	1.05243	1.09122	1.16614	1.00803	1.07778	1.01227	0.996207	1.04019	1.05106	1.16591	1.02829	0.973848	1.02398	0.990149	0.919707	0.935195	0.787336	1.19806	1.00965	0.897269	0.694961	1.03572	1.09812	1.0031	1.1788
898	chr3	42083974	42606346	1.0248	0.860106	1.58709	0.98334	1.01613	0.844678	0.990842	0.914205	1.0693	0.936224	1.01654	0.951039	1.03541	1.01481	1.37768	0.931555	1.15754	1.01126	0.88232	1.00471	1.21604	1.05243	1.09122	1.16614	1.00803	1.07778	1.01227	0.996207	1.04019	1.05106	1.16591	1.02829	0.973848	1.02398	0.990149	0.919707	0.935195	0.787336	1.19806	1.00965	0.897269	0.694961	1.03572	1.09812	1.0031	1.1788
899	chr3	42606347	43163349	1.0248	0.860106	1.58709	0.98334	1.01613	0.844678	0.990842	0.914205	1.0693	0.936224	1.01654	0.951039	1.03541	1.01481	1.37768	0.931555	1.15754	0.830191	0.88232	1.00471	1.21604	1.05243	1.09122	1.16614	1.00803	1.07778	1.01227	0.996207	1.04019	1.05106	1.16591	1.02829	0.973848	1.02398	0.990149	0.919707	0.935195	0.787336	1.19806	1.00965	0.897269	0.694961	1.03572	1.09812	1.0031	1.1788
900	chr3	43163350	43694244	1.0248	0.860106	1.58709	0.98334	1.01613	0.844678	0.990842	0.914205	1.0693	0.936224	1.01654	0.951039	1.03541	1.01481	1.37768	0.931555	1.15754	0.830191	0.88232	1.00471	1.21604	1.05243	1.09122	1.16614	1.00803	1.07778	1.01227	0.996207	1.04019	1.05106	1.16591	1.02829	0.973848	1.02398	0.990149	0.919707	0.935195	0.787336	1.19806	1.00965	0.897269	0.694961	1.03572	1.09812	1.0031	1.1788
901	chr3	43694245	44214139	1.0248	0.860106	1.58709	0.98334	1.01613	0.844678	0.990842	0.914205	1.0693	0.936224	1.01654	0.951039	1.03541	1.01481	1.37768	0.931555	1.15754	0.830191	0.88232	1.00471	1.21604	1.05243	1.09122	1.16614	1.00803	1.07778	1.01227	0.996207	1.04019	1.05106	1.16591	1.02829	0.973848	1.02398	0.990149	0.919707	0.935195	0.787336	1.19806	1.00965	0.897269	0.694961	1.03572	1.09812	1.0031	1.1788
902	chr3	44214140	44782404	1.0248	0.860106	1.58709	0.98334	1.01613	0.844678	0.990842	0.914205	1.0693	0.936224	1.01654	0.951039	1.03541	1.01481	1.37768	0.931555	1.15754	0.830191	0.88232	1.00471	1.21604	1.05243	1.09122	1.16614	1.00803	1.07778	1.01227	0.996207	1.04019	1.05106	1.16591	1.02829	0.973848	1.02398	0.990149	0.919707	0.935195	0.787336	1.19806	1.00965	0.897269	1.00431	1.03572	1.09812	1.0031	1.1788
903	chr3	44782405	45298111	1.0248	0.860106	1.58709	0.98334	1.01613	0.844678	0.990842	0.914205	1.0693	0.936224	1.01654	0.951039	1.03541	1.01481	1.37768	0.931555	1.15754	0.830191	0.88232	1.00471	1.21604	1.05243	1.09122	1.16614	1.00803	1.07778	1.01227	0.996207	1.04019	1.05106	1.16591	1.02829	0.973848	1.02398	0.990149	0.919707	0.935195	0.787336	1.19806	1.00965	0.897269	1.00431	1.03572	1.09812	1.0031	1.1788
904	chr3	45298112	45822942	1.0248	0.860106	1.58709	0.98334	1.01613	0.844678	0.990842	0.914205	1.0693	0.936224	1.01654	0.951039	1.03541	1.01481	1.37768	0.931555	1.15754	0.830191	0.88232	1.00471	1.21604	1.05243	1.09122	1.16614	1.00803	1.07778	1.01227	0.996207	1.04019	1.05106	1.16591	1.02829	0.973848	1.02398	0.990149	0.919707	0.935195	0.787336	1.19806	1.00965	0.897269	1.00431	1.03572	1.09812	1.0031	1.1788
905	chr3	45822943	46339854	1.0248	0.860106	1.58709	0.98334	1.01613	0.844678	0.990842	0.64481	1.0693	0.936224	1.01654	0.951039	1.03541	1.01481	1.37768	0.931555	1.15754	0.830191	0.88232	1.00471	1.21604	1.05243	1.09122	1.16614	1.00803	1.07778	1.01227	0.996207	1.04019	1.05106	1.16591	1.02829	0.973848	1.02398	0.990149	0.919707	0.935195	0.787336	1.19806	1.00965	0.897269	1.00431	1.03572	1.09812	1.0031	1.1788
906	chr3	46339855	46889781	1.0248	0.860106	1.58709	0.98334	1.01613	0.844678	0.990842	0.64481	1.0693	0.936224	1.01654	0.951039	1.03541	1.01481	1.37768	0.931555	1.15754	0.830191	0.88232	1.00471	1.21604	1.05243	1.09122	1.16614	1.00803	1.07778	1.01227	0.996207	1.04019	1.05106	1.16591	1.02829	0.973848	1.02398	0.990149	0.919707	0.935195	0.787336	1.19806	1.00965	0.897269	1.00431	1.03572	1.09812	1.0031	1.1788
907	chr3	46889782	47446010	1.0248	0.860106	1.58709	0.98334	1.01613	0.844678	0.990842	0.64481	1.0693	0.936224	1.01654	0.951039	1.03541	1.01481	1.37768	1.04019	1.15754	0.830191	0.88232	1.00471	1.21604	1.05243	1.09122	1.16614	1.00803	1.07778	1.01227	0.996207	1.04019	1.05106	1.16591	1.02829	0.973848	1.02398	0.990149	1.18697	0.935195	0.787336	1.19806	1.00965	0.897269	1.00431	1.03572	1.09812	1.0031	1.1788
908	chr3	47446011	48027036	1.0248	0.860106	1.25295	0.98334	1.01613	0.844678	0.990842	0.64481	1.0693	0.936224	1.01654	0.951039	1.03541	1.01481	1.37768	1.04019	1.15754	0.830191	0.980787	1.00471	1.21604	1.05243	1.09122	1.16614	1.00803	1.07778	1.01227	0.996207	1.04019	1.05106	1.16591	1.02829	0.973848	1.02398	0.990149	1.18697	0.935195	0.787336	1.19806	1.00965	0.897269	1.00431	1.03572	1.09812	1.0031	1.1788
909	chr3	48027037	48600397	1.0248	0.860106	1.25295	0.98334	1.01613	0.844678	0.990842	0.64481	1.0693	0.936224	1.01654	0.951039	1.03541	1.01481	1.37768	1.04019	1.15754	0.830191	0.980787	1.00471	1.21604	1.05243	1.09122	1.16614	1.00803	1.07778	1.01227	0.996207	1.04019	1.05106	1.16591	1.02829	0.973848	1.02398	0.990149	1.18697	0.935195	0.787336	1.19806	1.00965	0.897269	1.00431	1.03572	1.09812	1.0031	1.1788
910	chr3	48600398	49149706	1.0248	0.860106	1.25295	0.98334	1.01613	0.844678	0.990842	0.64481	1.0693	0.936224	1.01654	0.951039	1.03541	1.01481	1.37768	1.04019	1.15754	0.830191	0.980787	1.00471	1.21604	1.05243	1.09122	1.16614	1.00803	1.07778	1.01227	0.996207	1.04019	1.05106	1.16591	1.02829	0.973848	1.02398	0.990149	1.18697	0.935195	0.787336	1.19806	1.00965	1.54265	1.00431	1.03572	1.09812	1.0031	1.1788
911	chr3	49149707	49700510	1.0248	0.860106	1.25295	0.98334	1.01613	0.844678	0.990842	0.9445	1.0693	0.936224	1.01654	0.951039	1.03541	1.01481	1.37768	1.04019	1.15754	0.830191	0.980787	1.00471	1.21604	1.05243	1.09122	1.16614	1.00803	1.07778	1.01227	0.996207	1.04019	1.05106	1.16591	1.02829	0.973848	1.02398	0.990149	1.18697	0.935195	0.787336	1.19806	1.00965	1.54265	1.00431	1.03572	1.09812	1.0031	1.1788
912	chr3	49700511	50233179	1.0248	0.860106	1.25295	0.98334	1.01613	0.844678	0.990842	0.9445	1.0693	0.936224	1.01654	0.951039	1.03541	1.01481	1.37768	1.04019	1.15754	1.0017	0.980787	1.00471	1.21604	1.05243	1.09122	1.16614	1.00803	1.07778	1.01227	0.996207	1.04019	1.05106	1.16591	1.02829	0.973848	1.02398	0.990149	1.18697	0.935195	0.787336	1.19806	1.00965	1.54265	0.733887	1.03572	1.09812	1.0031	1.1788
913	chr3	50233180	50727889	1.0248	0.860106	1.25295	0.98334	1.01613	0.844678	0.990842	0.9445	1.0693	0.936224	1.3275	0.951039	1.03541	1.15905	1.37768	1.04019	1.15754	1.0017	0.980787	1.00471	1.21604	1.05243	1.09122	1.16614	1.00803	1.07778	1.01227	0.996207	1.04019	1.05106	1.16591	1.02829	0.973848	1.02398	0.990149	1.18697	0.935195	0.787336	1.19806	1.00965	1.54265	0.733887	1.03572	1.09812	1.0031	1.1788
914	chr3	50727890	51379533	1.0248	0.860106	1.25295	0.98334	1.01613	0.844678	0.990842	0.9445	1.0693	0.936224	1.3275	0.951039	1.03541	1.15905	1.37768	1.04019	1.15754	1.0017	0.980787	1.00471	1.21604	1.05243	1.09122	1.16614	1.00803	1.07778	1.01227	0.996207	1.04019	1.05106	1.16591	1.02829	0.973848	1.02398	0.990149	1.18697	0.935195	0.787336	1.19806	1.00965	1.54265	0.733887	1.03572	1.09812	1.0031	1.1788
915	chr3	51379534	51962425	1.0248	0.860106	1.05643	0.98334	1.01613	0.844678	0.990842	0.9445	1.0693	0.936224	1.3275	0.951039	1.03541	1.15905	1.37768	1.04019	1.15754	1.0017	0.980787	1.00471	1.21604	1.05243	1.09122	1.16614	1.00803	1.07778	1.01227	0.996207	1.04019	1.05106	1.16591	1.02829	0.973848	1.02398	0.990149	1.18697	0.935195	0.787336	1.19806	1.00965	1.54265	0.733887	1.03572	1.09812	1.0031	1.1788
916	chr3	51962426	52462523	1.0248	1.1402	1.05643	0.98334	1.01613	0.844678	0.990842	0.9445	1.0693	0.936224	1.3275	0.951039	1.03541	1.15905	1.37768	1.04019	1.15754	1.0017	0.980787	1.00471	1.21604	1.05243	1.09122	1.16614	1.00803	1.07778	1.01227	0.996207	1.04019	1.05106	0.967635	1.02829	0.973848	1.02398	0.990149	1.18697	0.935195	1.12975	1.19806	1.00965	1.54265	0.733887	1.03572	1.09812	1.0031	1.1788
917	chr3	52462524	52995515	1.0248	1.1402	1.05643	0.98334	1.01613	0.844678	0.990842	0.9445	1.0693	0.774684	1.3275	0.951039	1.03541	1.15905	1.05096	1.04019	1.15754	1.0017	0.980787	1.00471	1.21604	1.05243	1.09122	1.16614	1.00803	1.07778	1.01227	0.996207	1.04019	1.05106	0.967635	1.02829	0.973848	1.02398	0.990149	1.18697	0.935195	1.12975	1.19806	1.00965	1.54265	0.733887	1.03572	1.09812	1.0031	1.1788
918	chr3	52995516	53575891	1.0248	1.1402	1.05643	0.98334	1.01613	0.844678	0.841054	0.9445	1.0693	0.774684	1.3275	0.951039	1.03541	1.15905	1.05096	1.04019	1.15754	1.0017	0.980787	1.00471	1.21604	1.05243	1.09122	1.16614	1.00803	1.07778	1.01227	0.996207	1.04019	1.05106	0.967635	1.02829	0.973848	1.02398	0.990149	1.18697	0.935195	1.12975	1.19806	1.00965	1.54265	0.733887	1.03572	1.09812	1.0031	1.1788
919	chr3	53575892	54093014	1.0248	1.1402	1.05643	0.98334	1.01613	0.844678	0.841054	0.9445	1.0693	0.774684	1.3275	0.951039	1.03541	1.15905	1.05096	1.04019	1.15754	1.0017	0.980787	1.00471	1.21604	1.05243	1.09122	1.16614	1.00803	1.07778	1.01227	0.996207	1.04019	1.05106	0.967635	1.02829	0.973848	1.02398	0.990149	1.18697	0.935195	1.12975	1.19806	1.00965	1.54265	0.733887	1.03572	1.09812	1.0031	1.1788
920	chr3	54093015	54649019	1.0248	1.1402	1.05643	0.98334	1.01613	0.844678	0.841054	0.9445	1.0693	0.774684	1.3275	0.951039	1.03541	1.15905	1.05096	1.04019	1.15754	1.0017	0.980787	1.00471	1.21604	1.05243	1.09122	1.16614	1.00803	1.07778	1.01227	0.996207	1.04019	1.05106	0.967635	1.02829	0.973848	1.02398	0.990149	1.18697	0.935195	1.12975	1.19806	1.00965	1.54265	0.733887	1.03572	1.09812	1.0031	1.1788
921	chr3	54649020	55169569	1.0248	1.1402	1.05643	0.98334	1.01613	0.844678	0.841054	0.9445	1.0693	0.774684	1.3275	0.951039	1.03541	1.15905	1.05096	1.04019	1.15754	1.0017	0.980787	1.00471	1.21604	1.05243	1.09122	1.16614	1.00803	1.07778	1.01227	0.996207	1.04019	1.05106	0.967635	1.02829	0.973848	1.02398	0.990149	1.18697	0.935195	1.12975	1.19806	1.00965	1.54265	1.01329	1.03572	1.09812	1.0031	1.1788
922	chr3	55169570	55699552	1.0248	1.1402	1.05643	0.98334	1.01613	0.844678	0.841054	0.9445	1.0693	0.774684	1.3275	0.951039	1.03541	1.15905	1.05096	1.04019	1.15754	1.0017	0.980787	1.00471	1.21604	1.05243	1.09122	1.16614	1.00803	1.07778	1.01227	0.996207	1.04019	1.05106	0.967635	1.02829	0.973848	1.02398	0.990149	1.18697	0.935195	1.12975	1.19806	1.00965	1.54265	1.01329	1.03572	1.09812	1.0031	1.1788
923	chr3	55699553	56231169	1.0248	1.1402	1.05643	0.98334	1.01613	0.844678	0.841054	0.9445	1.0693	0.774684	1.3275	0.951039	1.03541	1.15905	1.05096	1.04019	1.15754	1.0017	0.980787	1.00471	1.21604	1.05243	1.09122	1.16614	1.00803	1.07778	1.01227	0.996207	1.04019	1.05106	0.967635	1.02829	0.973848	1.02398	0.990149	1.18697	0.935195	1.12975	1.19806	1.00965	1.54265	1.01329	1.03572	1.09812	1.0031	1.1788
924	chr3	56231170	56819544	1.0248	1.1402	1.05643	0.98334	1.01613	0.844678	0.841054	0.9445	1.0693	0.774684	1.3275	0.951039	1.03541	1.15905	1.05096	1.04019	1.62466	1.0017	0.980787	1.00471	1.21604	1.05243	1.09122	1.16614	1.00803	1.07778	1.01227	0.996207	1.04019	1.05106	0.967635	1.02829	0.973848	1.02398	0.990149	1.18697	0.935195	1.12975	1.19806	1.00965	1.54265	1.01329	1.03572	1.09812	1.0031	1.1788
925	chr3	56819545	57384562	1.0248	1.1402	1.05643	0.98334	1.01613	0.844678	0.841054	0.9445	1.0693	0.774684	1.3275	0.951039	1.03541	1.15905	1.05096	1.04019	1.62466	1.0017	0.980787	1.00471	1.21604	1.05243	1.09122	1.16614	1.00803	1.07778	1.01227	0.996207	1.04019	1.05106	0.967635	1.02829	0.973848	1.02398	0.990149	1.18697	0.935195	1.12975	1.19806	1.00965	1.54265	1.01329	1.03572	1.09812	1.0031	1.1788
926	chr3	57384563	57983851	1.0248	1.1402	1.05643	0.98334	1.01613	0.844678	0.841054	0.9445	1.0693	0.774684	1.3275	0.951039	1.03541	1.15905	1.05096	1.04019	1.62466	1.0017	0.980787	1.00471	1.21604	1.05243	1.09122	1.16614	1.00803	1.07778	1.01227	0.996207	1.04019	0.915029	0.967635	1.02829	0.973848	1.02398	0.990149	1.18697	0.935195	1.12975	1.19806	1.00965	1.54265	1.01329	1.03572	1.09812	1.0031	1.1788
927	chr3	57983852	58497711	1.0248	1.1402	1.05643	0.98334	1.01613	0.844678	0.841054	0.9445	1.0693	0.774684	1.3275	0.951039	1.03541	1.15905	1.05096	1.04019	1.62466	1.0017	0.980787	1.00471	1.21604	1.05243	1.09122	1.16614	1.00803	1.07778	1.01227	0.996207	1.04019	0.915029	0.967635	1.02829	0.973848	1.02398	0.990149	1.18697	0.935195	1.12975	1.19806	1.00965	0.887009	1.01329	1.03572	1.09812	1.0031	1.1788
928	chr3	58497712	59041179	1.0248	1.1402	1.05643	0.98334	1.01613	0.844678	0.841054	0.9445	1.0693	0.774684	1.3275	0.951039	1.03541	1.15905	1.05096	1.04019	1.62466	1.0017	0.980787	1.00471	1.21604	1.05243	1.09122	1.16614	1.00803	1.07778	1.01227	0.996207	1.04019	0.915029	0.967635	1.02829	0.973848	1.02398	0.990149	1.18697	0.935195	1.12975	1.19806	1.00965	0.887009	1.28249	1.03572	1.09812	1.0031	1.1788
929	chr3	59041180	59607994	1.0248	1.1402	1.05643	0.98334	1.01613	0.844678	0.841054	0.9445	1.0693	0.774684	1.3275	0.951039	1.03541	1.15905	1.05096	1.04019	1.62466	1.0017	0.980787	1.00471	1.21604	1.05243	1.09122	1.16614	1.00803	1.07778	1.01227	0.996207	1.04019	0.915029	0.967635	1.02829	0.973848	1.02398	0.990149	1.18697	0.935195	1.12975	1.19806	1.00965	0.887009	1.28249	1.03572	1.09812	1.0031	1.1788
930	chr3	59607995	60132560	1.0248	1.1402	1.05643	0.98334	1.01613	0.844678	0.841054	0.9445	1.0693	0.774684	1.3275	0.951039	1.03541	1.15905	1.05096	1.04019	1.62466	1.0017	0.980787	1.00471	1.21604	1.05243	1.09122	1.16614	1.00803	1.07778	1.01227	0.996207	1.04019	0.915029	0.967635	1.02829	0.973848	1.02398	0.990149	1.18697	0.935195	1.12975	1.39027	1.00965	0.887009	1.28249	1.03572	1.09812	1.0031	1.1788
931	chr3	60132561	60705843	1.0248	1.1402	1.25684	0.98334	1.01613	0.844678	0.841054	0.9445	1.0693	0.774684	1.3275	0.951039	1.03541	1.15905	1.05096	1.04019	1.62466	1.0017	0.980787	1.00471	1.21604	1.05243	1.09122	1.16614	1.00803	1.07778	1.01227	0.996207	1.04019	0.915029	0.967635	1.02829	0.973848	1.02398	0.990149	1.18697	0.935195	1.12975	1.39027	1.00965	0.887009	1.28249	1.03572	1.09812	1.0031	1.1788
932	chr3	60705844	61292345	1.0248	1.1402	1.25684	0.98334	1.01613	0.844678	0.841054	0.9445	1.0693	0.774684	1.3275	0.951039	1.03541	1.15905	1.05096	1.04019	1.62466	1.0017	0.980787	1.00471	1.21604	1.05243	1.09122	1.16614	1.00803	1.07778	1.01227	0.996207	1.04019	0.915029	0.967635	1.02829	0.973848	1.02398	0.990149	1.18697	0.935195	1.12975	1.39027	1.00965	0.887009	1.28249	1.03572	1.09812	1.0031	1.1788
933	chr3	61292346	61857481	1.0248	1.1402	1.25684	0.98334	1.01613	0.844678	0.841054	0.9445	1.0693	0.774684	1.3275	0.951039	1.03541	1.15905	1.05096	1.04019	1.62466	1.0017	0.980787	1.00471	1.21604	1.05243	1.09122	1.16614	1.00803	1.07778	1.01227	0.996207	1.04019	0.915029	0.967635	1.02829	0.973848	1.02398	0.990149	1.18697	0.935195	1.12975	1.39027	1.00965	0.887009	1.28249	1.03572	1.09812	1.0031	1.1788
934	chr3	61857482	62411970	1.0248	1.1402	1.25684	0.98334	1.01613	0.844678	0.841054	0.9445	1.0693	0.774684	1.3275	0.951039	1.03541	1.15905	1.05096	1.04019	1.62466	1.0017	0.980787	1.00471	1.21604	1.05243	1.09122	1.16614	1.00803	1.07778	1.01227	0.996207	1.04019	0.915029	0.967635	1.02829	0.973848	1.02398	0.990149	1.18697	0.935195	1.12975	1.39027	1.00965	0.887009	1.28249	1.03572	1.09812	1.0031	1.1788
935	chr3	62411971	62937024	1.0248	1.1402	1.25684	0.98334	1.01613	0.844678	0.841054	0.9445	1.0693	0.774684	1.3275	0.951039	1.03541	1.15905	1.05096	1.04019	1.62466	1.0017	0.980787	1.00471	1.21604	1.05243	1.09122	1.16614	1.00803	1.07778	1.01227	0.996207	1.04019	0.915029	0.967635	1.02829	0.973848	1.02398	0.990149	1.18697	0.935195	1.12975	1.39027	1.00965	0.887009	1.28249	1.03572	1.09812	1.0031	1.1788
936	chr3	62937025	63524511	1.0248	1.1402	1.25684	0.98334	1.01613	0.844678	0.841054	0.9445	1.0693	0.774684	1.3275	0.951039	1.03541	1.15905	1.05096	1.04019	1.62466	1.0017	0.980787	1.00471	1.21604	1.05243	1.09122	1.16614	1.00803	1.07778	1.01227	0.996207	1.04019	0.915029	0.967635	1.02829	0.973848	1.02398	0.990149	1.18697	0.935195	1.12975	1.39027	1.00965	0.887009	1.28249	1.03572	1.09812	1.0031	1.1788
937	chr3	63524512	64072054	1.0248	1.1402	1.25684	0.98334	1.01613	0.844678	0.841054	0.9445	1.0693	0.774684	1.3275	0.951039	1.03541	1.15905	1.05096	1.04019	1.62466	1.0017	0.980787	1.00471	1.21604	1.05243	1.09122	1.16614	1.00803	1.07778	1.01227	0.996207	1.04019	0.915029	0.967635	1.02829	0.973848	1.02398	0.990149	1.18697	0.935195	1.12975	1.39027	1.00965	0.887009	1.28249	1.03572	1.09812	1.0031	1.1788
938	chr3	64072055	64571001	1.0248	1.1402	1.25684	0.98334	1.01613	0.844678	0.841054	0.9445	1.0693	0.774684	1.3275	0.951039	1.03541	1.15905	1.05096	1.04019	1.0921	1.0017	0.980787	1.00471	1.21604	1.05243	1.09122	1.16614	1.00803	1.07778	1.01227	0.996207	1.04019	0.915029	0.967635	1.02829	0.973848	1.02398	0.990149	1.18697	0.935195	1.12975	1.39027	1.00965	0.887009	1.28249	1.03572	1.09812	1.0031	1.1788
939	chr3	64571002	65098863	1.0248	1.1402	1.25684	0.98334	1.01613	0.844678	0.841054	0.9445	1.0693	0.774684	0.793978	0.951039	1.03541	1.15905	0.905018	1.04019	1.0921	1.0017	0.980787	1.00471	1.21604	1.05243	1.09122	0.788518	1.00803	1.07778	1.01227	0.996207	1.04019	0.915029	0.967635	1.02829	0.973848	1.02398	0.990149	1.18697	0.935195	1.12975	1.39027	1.00965	0.887009	0.674152	1.03572	1.09812	1.0031	1.1788
940	chr3	65098864	65654069	1.0248	1.1402	1.25684	0.98334	1.01613	0.844678	0.841054	0.9445	1.0693	0.88692	0.793978	0.951039	1.03541	1.15905	0.905018	1.04019	1.0921	1.0017	0.980787	1.00471	1.21604	1.05243	0.911558	0.788518	1.00803	1.07778	1.01227	0.996207	1.04019	0.915029	0.967635	1.02829	0.973848	1.02398	0.990149	1.18697	0.935195	1.12975	1.39027	1.00965	0.887009	0.674152	1.03572	1.09812	1.0031	1.1788
941	chr3	65654070	66283623	1.0248	1.1402	1.25684	0.98334	1.01613	0.844678	0.841054	0.9445	1.0693	0.88692	0.793978	0.951039	1.03541	1.15905	0.905018	1.04019	1.0921	1.0017	0.980787	1.00471	1.21604	1.05243	0.911558	0.788518	1.00803	1.07778	1.01227	0.996207	1.04019	0.915029	0.967635	1.02829	0.973848	1.02398	0.990149	1.18697	0.935195	1.12975	1.39027	1.00965	0.887009	0.674152	1.03572	1.09812	1.0031	1.1788
942	chr3	66283624	66822907	1.0248	1.1402	1.25684	0.98334	1.01613	0.844678	0.841054	0.9445	1.0693	0.88692	0.793978	0.951039	1.03541	1.15905	0.905018	1.04019	1.5658	1.0017	0.980787	1.00471	1.21604	1.05243	0.911558	0.788518	1.00803	1.07778	1.01227	0.996207	1.04019	0.915029	1.24359	1.02829	0.973848	1.02398	0.990149	1.18697	0.935195	1.12975	1.39027	1.00965	0.887009	1.27379	1.03572	1.09812	1.0031	1.1788
943	chr3	66822908	67412137	1.0248	1.1402	1.25684	0.98334	1.01613	0.844678	0.841054	0.9445	1.0693	0.88692	1.10583	0.951039	1.03541	1.15905	0.905018	1.04019	1.5658	1.0017	0.980787	1.00471	1.21604	1.05243	0.911558	0.788518	1.00803	1.07778	1.01227	0.996207	1.04019	0.915029	1.24359	1.02829	0.973848	1.02398	0.990149	1.18697	0.935195	1.12975	1.39027	1.00965	0.887009	1.27379	1.03572	1.09812	1.0031	1.1788
944	chr3	67412138	68009767	1.0248	1.1402	1.25684	0.98334	1.01613	0.844678	0.841054	0.9445	1.0693	0.88692	1.10583	0.951039	1.03541	1.15905	0.905018	1.04019	1.5658	1.0017	0.980787	1.00471	1.21604	1.05243	0.911558	0.788518	1.00803	1.07778	1.01227	0.996207	1.04019	0.915029	1.24359	1.02829	0.973848	1.02398	0.990149	1.18697	0.935195	1.12975	1.39027	1.00965	0.887009	1.27379	1.03572	1.09812	1.0031	1.1788
945	chr3	68009768	68606505	1.0248	1.1402	1.25684	0.98334	1.01613	0.844678	0.841054	0.9445	1.0693	0.88692	1.10583	0.951039	1.03541	1.15905	0.905018	1.04019	1.5658	1.0017	0.980787	1.00471	1.21604	1.05243	0.911558	0.788518	1.00803	1.07778	1.01227	0.996207	1.04019	0.915029	1.24359	1.02829	0.973848	1.02398	0.990149	1.18697	0.935195	1.12975	1.39027	1.00965	0.887009	1.27379	1.03572	1.09812	1.0031	1.1788
946	chr3	68606506	69201479	1.0248	1.1402	1.25684	0.98334	1.01613	0.844678	0.841054	0.9445	1.0693	0.88692	1.10583	0.951039	1.03541	1.15905	0.905018	1.04019	1.5658	1.0017	0.980787	1.00471	1.21604	1.05243	0.911558	0.788518	1.00803	1.07778	1.01227	0.996207	1.04019	0.915029	1.24359	1.02829	0.973848	1.02398	0.990149	1.18697	0.935195	1.12975	1.39027	1.00965	0.887009	1.27379	1.03572	1.09812	1.0031	1.1788
947	chr3	69201480	69772206	1.0248	1.1402	1.25684	0.98334	1.01613	0.844678	0.841054	0.9445	1.0693	0.88692	1.10583	0.951039	1.03541	1.15905	0.905018	1.04019	1.5658	1.0017	0.980787	1.00471	1.21604	1.05243	0.911558	0.788518	1.00803	1.07778	1.01227	0.996207	1.04019	0.915029	1.24359	1.02829	0.973848	0.944405	0.990149	1.18697	0.935195	1.12975	1.39027	1.00965	0.887009	1.27379	1.03572	1.09812	1.0031	1.1788
948	chr3	69772207	70329331	1.0248	1.1402	1.25684	0.98334	1.01613	0.844678	0.841054	0.9445	1.0693	0.88692	1.10583	0.951039	1.03541	1.15905	0.905018	1.04019	1.5658	1.0017	0.980787	1.00471	1.21604	1.05243	0.911558	0.788518	1.00803	1.07778	1.01227	0.996207	1.04019	0.915029	1.24359	1.02829	0.973848	0.944405	0.990149	1.18697	0.935195	1.12975	1.39027	1.00965	0.887009	1.27379	1.03572	1.09812	1.0031	1.1788
949	chr3	70329332	70939063	1.0248	1.1402	1.25684	0.98334	1.01613	0.844678	0.841054	0.9445	1.0693	0.88692	1.10583	0.951039	1.03541	1.15905	0.905018	1.04019	1.5658	1.0017	0.980787	1.00471	1.21604	1.05243	0.911558	0.788518	1.00803	1.07778	1.01227	0.996207	1.04019	0.915029	1.24359	1.02829	0.973848	0.944405	0.990149	1.18697	0.935195	1.12975	1.39027	1.00965	0.887009	1.27379	1.03572	1.09812	1.0031	1.1788
950	chr3	70939064	71470803	1.0248	1.1402	1.25684	0.98334	1.01613	0.844678	0.841054	0.9445	1.0693	0.88692	1.10583	0.951039	1.03541	1.15905	0.905018	1.04019	1.5658	1.19889	0.980787	1.00471	1.21604	1.05243	0.911558	0.788518	1.00803	1.07778	1.01227	0.996207	1.04019	0.915029	1.24359	1.02829	0.973848	0.944405	0.990149	1.18697	0.935195	1.12975	1.39027	1.00965	0.887009	1.27379	1.03572	1.09812	1.0031	1.1788
951	chr3	71470804	71999770	1.0248	1.1402	1.25684	0.98334	1.01613	0.844678	0.841054	0.9445	1.0693	0.88692	1.10583	0.951039	1.03541	1.15905	0.905018	1.04019	1.5658	1.19889	0.980787	1.00471	1.21604	1.05243	0.911558	0.788518	1.00803	1.07778	1.01227	0.996207	1.04019	0.915029	1.24359	1.02829	0.973848	0.944405	0.990149	1.18697	0.935195	1.12975	1.39027	1.00965	0.887009	1.27379	1.03572	1.09812	1.0031	1.1788
952	chr3	71999771	72492845	1.0248	1.1402	1.25684	0.98334	1.01613	0.844678	0.841054	0.9445	1.0693	0.88692	1.10583	0.951039	1.03541	1.15905	0.905018	1.04019	1.5658	1.19889	0.980787	1.00471	1.21604	1.05243	0.911558	0.788518	1.00803	1.07778	1.01227	0.996207	1.04019	0.915029	1.24359	1.02829	0.973848	0.944405	0.990149	1.18697	0.935195	1.12975	1.39027	1.00965	0.887009	1.27379	1.03572	1.09812	1.0031	1.1788
953	chr3	72492846	73062120	1.0248	1.1402	1.25684	0.98334	1.01613	0.844678	0.841054	0.9445	1.0693	0.88692	1.10583	0.951039	1.03541	1.15905	0.905018	1.04019	1.5658	1.19889	0.980787	1.00471	1.21604	1.05243	0.911558	0.788518	1.00803	1.07778	1.01227	0.996207	1.04019	0.915029	1.24359	1.02829	0.973848	0.944405	0.990149	1.18697	0.935195	1.12975	1.39027	1.00965	0.887009	1.27379	1.03572	1.09812	1.0031	1.1788
954	chr3	73062121	73610569	1.0248	1.1402	1.25684	0.98334	1.01613	0.844678	0.841054	0.9445	1.0693	1.12851	0.902398	0.951039	1.03541	1.15905	0.905018	1.04019	1.5658	1.19889	0.980787	1.00471	1.21604	1.05243	0.911558	0.788518	1.00803	1.07778	1.01227	0.996207	1.04019	0.915029	1.24359	1.02829	0.973848	0.944405	0.990149	1.18697	0.935195	1.12975	1.39027	1.00965	0.887009	1.27379	1.03572	1.09812	1.0031	1.1788
955	chr3	73610570	74161855	1.0248	1.1402	1.25684	0.98334	1.01613	0.844678	0.841054	0.9445	1.0693	1.12851	0.902398	0.951039	1.03541	1.15905	0.905018	1.04019	1.5658	1.01765	0.980787	1.00471	1.21604	1.05243	0.911558	0.788518	1.00803	1.07778	1.01227	0.996207	1.04019	1.18459	1.24359	1.02829	0.973848	0.944405	0.990149	1.18697	0.935195	1.12975	1.39027	1.00965	0.887009	1.27379	1.03572	1.09812	1.0031	1.1788
956	chr3	74161856	74730480	1.0248	1.1402	1.25684	0.98334	1.01613	0.844678	0.841054	0.9445	1.0693	1.12851	0.902398	0.951039	1.03541	1.15905	0.905018	1.04019	1.5658	1.01765	0.980787	1.00471	1.21604	1.05243	0.911558	0.788518	1.00803	1.07778	1.01227	0.996207	1.04019	1.18459	1.24359	1.02829	0.973848	0.944405	0.990149	1.18697	0.935195	1.12975	1.39027	1.00965	0.887009	1.27379	1.03572	1.09812	1.0031	1.1788
957	chr3	74730481	75336686	1.0248	1.1402	1.25684	0.98334	1.01613	0.844678	0.841054	0.9445	1.0693	1.12851	0.902398	0.951039	1.03541	1.15905	0.905018	1.04019	1.5658	1.01765	0.980787	1.00471	1.21604	1.05243	0.911558	0.788518	1.00803	1.07778	1.01227	0.996207	1.04019	1.18459	1.24359	1.02829	0.973848	0.944405	0.990149	1.18697	0.935195	1.12975	1.39027	1.00965	0.887009	1.0693	1.03572	1.09812	1.0031	1.1788
958	chr3	75336687	75940031	1.0248	1.1402	1.25684	0.98334	1.01613	0.844678	0.841054	0.9445	1.0693	1.12851	0.902398	0.951039	1.03541	1.15905	0.905018	1.04019	1.5658	1.01765	0.980787	1.00471	1.21604	1.05243	0.911558	0.788518	1.00803	1.07778	1.01227	0.996207	1.04019	1.18459	1.24359	1.02829	0.973848	0.944405	0.990149	1.18697	0.935195	1.12975	1.39027	1.00965	0.887009	1.0693	1.03572	1.09812	1.0031	1.1788
959	chr3	75940032	76555927	1.0248	1.1402	1.25684	0.98334	1.01613	0.844678	0.841054	0.9445	1.0693	1.12851	0.902398	0.951039	1.03541	1.15905	0.905018	1.04019	1.5658	1.01765	0.980787	1.00471	1.21604	1.05243	0.911558	0.788518	1.00803	1.07778	1.01227	0.996207	1.04019	1.18459	1.24359	1.02829	0.973848	0.944405	0.990149	1.18697	0.935195	1.12975	1.39027	1.00965	0.887009	1.0693	1.03572	1.09812	1.0031	1.1788
960	chr3	76555928	77183143	1.0248	1.1402	1.25684	0.98334	1.01613	0.844678	0.841054	0.9445	1.0693	1.12851	0.902398	0.951039	1.03541	1.15905	0.905018	1.04019	1.5658	1.01765	0.980787	1.00471	1.21604	1.05243	0.911558	0.788518	1.00803	1.07778	1.01227	0.996207	1.04019	1.18459	1.24359	1.02829	0.973848	0.944405	0.990149	1.18697	0.935195	1.12975	1.39027	1.00965	0.887009	1.0693	1.03572	1.09812	1.0031	1.1788
961	chr3	77183144	77810468	1.0248	1.1402	1.25684	0.98334	1.01613	1.2025	0.841054	0.9445	1.0693	1.12851	0.902398	0.951039	1.03541	1.15905	0.905018	1.04019	1.5658	1.01765	0.980787	1.00471	1.21604	1.05243	0.911558	0.788518	1.00803	1.07778	1.01227	0.996207	1.04019	1.18459	1.24359	1.02829	0.973848	0.944405	0.990149	1.18697	0.935195	1.12975	1.39027	1.00965	0.887009	1.0693	1.03572	1.09812	1.0031	1.1788
962	chr3	77810469	78437169	1.0248	1.1402	1.25684	0.98334	1.01613	1.2025	0.841054	0.9445	1.0693	1.12851	0.902398	0.951039	1.03541	1.15905	1.09669	1.04019	1.5658	1.01765	0.980787	1.00471	1.21604	1.05243	0.911558	0.788518	1.00803	1.07778	1.01227	0.996207	1.04019	1.18459	1.24359	1.02829	0.973848	0.944405	0.990149	1.18697	0.935195	1.12975	1.39027	1.00965	0.887009	1.0693	1.03572	1.09812	1.0031	1.1788
963	chr3	78437170	79070089	1.0248	1.1402	1.25684	0.98334	1.01613	1.2025	0.841054	0.9445	1.0693	1.12851	0.902398	0.951039	1.03541	1.01755	1.09669	1.04019	1.5658	1.01765	0.980787	1.00471	1.21604	1.05243	0.911558	0.788518	1.00803	1.07778	1.01227	0.996207	1.04019	1.18459	1.24359	1.02829	0.973848	0.944405	0.990149	1.18697	0.935195	1.12975	1.39027	1.00965	0.887009	1.0693	1.03572	1.09812	1.0031	1.1788
964	chr3	79070090	79728056	1.0248	1.1402	0.977751	0.98334	1.01613	1.2025	0.841054	1.12716	1.0693	1.12851	0.902398	0.951039	1.03541	1.01755	1.09669	1.04019	1.5658	1.01765	0.980787	1.00471	1.21604	1.05243	0.911558	0.788518	1.00803	1.07778	1.01227	0.996207	1.04019	1.18459	1.24359	1.02829	0.973848	0.944405	0.990149	1.18697	0.935195	1.12975	1.39027	1.00965	0.887009	1.0693	1.03572	1.09812	1.0031	1.1788
965	chr3	79728057	80392717	1.0248	1.1402	0.977751	0.98334	1.01613	1.2025	0.841054	1.12716	1.0693	1.12851	0.902398	0.951039	1.03541	1.01755	1.09669	1.04019	1.5658	1.01765	0.980787	1.00471	1.21604	1.05243	0.911558	0.788518	1.00803	1.07778	1.01227	0.996207	1.04019	1.18459	1.24359	1.02829	0.973848	0.944405	0.990149	1.18697	0.935195	1.12975	1.39027	1.00965	0.887009	1.0693	1.03572	1.09812	1.0031	1.1788
966	chr3	80392718	81061276	1.0248	1.1402	0.977751	0.98334	1.01613	1.2025	0.841054	1.12716	1.0693	1.12851	0.902398	0.951039	1.03541	1.01755	1.09669	1.04019	1.5658	1.01765	0.980787	1.00471	1.21604	1.05243	0.911558	0.788518	1.00803	1.07778	1.01227	0.996207	1.04019	1.18459	1.24359	1.02829	0.973848	0.944405	0.990149	1.18697	0.935195	1.12975	1.39027	1.00965	0.887009	1.0693	1.03572	1.09812	1.0031	1.1788
967	chr3	81061277	81675769	1.0248	1.1402	0.977751	0.98334	1.01613	1.2025	0.841054	1.12716	1.0693	1.12851	0.902398	0.951039	1.03541	1.01755	1.09669	1.04019	1.5658	1.01765	0.980787	1.00471	1.21604	1.05243	0.911558	0.788518	1.00803	1.07778	1.01227	0.996207	1.04019	1.18459	1.24359	1.02829	0.973848	0.944405	0.990149	1.18697	0.935195	1.12975	1.39027	1.00965	0.887009	1.0693	1.03572	1.09812	1.0031	1.1788
[truncated: 4,033 more rows]
[truncated: 18 more columns]
