# Supplementary material for: Copolymerization of single-cell nucleic acids into balls of acrylamide gel
Source: Genome Res. 2020 Jan;30(1):49–61. doi: 10.1101/gr.253047.119 (PMC6961581; doi:10.1101/gr.253047.119)
Supplement: Supplemental Material [file supp_gr.253047.119_Supplemental_Data_S3.xlsx]

## Sheet: README
Supplemental Data S3 - Normalized bin count data for DNA BAGs from sample nyu005_8
Column name	Description
bin.number	sequence number of bin in genome order
chrom	chromosome location of the bin
bin.start	chromosome position bin start coordinate in hg19
bin.end	chromosome position bin end coordinate in hg19
11-character string consisting of ACGT indicating the BAG barcode	the normalized bin count value

## Sheet: nyu005_8.5k.bins.norm
bin.number	chrom	bin.start	bin.end	AAAGGGTCATC	AACCTCTGAAC	AACTTGCTAGA	AACTTGGGTCA	AAGATGGTTGA	AAGCATATACG	AAGCATTCTTA	AAGGTTGAAGA	AAGGTTTTACC	AAGTCAACACA	AAGTCAAGATC	AATGTCGGTTG	AATTAGAGACT	AATTAGTCTAC	AATTAGTTATT	AGAGTCGATGT	AGAGTCGGTAT	AGAGTCTCACT	AGCAACTTATT	AGCAGTATATA	AGTATTGTAAT	AGTATTTGAAC	AGTATTTGAGT	AGTTCGTGATA	ATATAGTGTGG	ATGACATATAG	ATGAGGAATAT	ATGAGGTGATA	ATGTGAAATTG	ATGTGACGTGA	ATTAGTTATCT	ATTCAGAATTG	ATTCAGTGTCC	ATTGACAATTG	ATTGACACAAT	ATTGACAGATC	CAACTTTCTCG	CAGAAGAGTCG	CAGAAGGTTGA	CAGTAAAGTGT	CAGTAACGTGA	CAGTAAGCAGT	CAGTAAGCTAA	CAGTAATGATA	CATAATCAACG	CATAATCGACA
1	chr1	1	452222	0.989747	0.966729	1.06282	1.22626	1.05033	1.20486	0.962806	0.836421	0.913958	1.32031	1.04322	0.930882	1.18494	1.09066	1.09186	1.34122	0.825319	1.00975	1.19614	1.05276	0.991371	1.22452	0.952226	1.20557	1.304	1.13014	1.14172	0.949149	1.13871	1.45209	0.95439	1.00964	1.31328	0.426846	0.821052	0.881806	1.3585	1.10471	0.940787	1.27079	0.877616	0.962966	1.24314	1.21733	1.0581	1.13054
2	chr1	452223	745221	0.835286	0.579637	0.61621	0.986073	0.563036	0.952418	0.561613	0.37628	0.485427	0.676929	1.14886	0.698901	0.582904	0.775142	1.18969	0.685568	0.540948	0.522755	0.726082	0.876647	1.23256	0.556194	0.400269	0.631536	0.311251	0.982917	0.527644	0.265078	0.456467	0.501743	0.869566	0.776915	0.968212	0.560979	0.38245	0.361916	0.615643	0.450057	0.324378	0.524921	0.984165	0.444652	0.480129	0.639022	0.60851	0.724267
3	chr1	745222	1492396	1.18665	1.52016	0.762819	1.38241	0.993098	0.78541	0.880711	0.916573	0.882353	0.993763	0.858761	1.02998	1.00185	0.944257	0.930336	0.974518	1.06284	1.00241	0.996639	1.1065	1.08503	0.928692	0.954954	1.44766	1.0366	0.966155	0.987619	0.826301	0.835992	0.98669	1.01446	1.05228	1.20051	0.987471	1.24282	1.046	1.00498	1.14248	0.998685	1.35334	1.81119	1.20737	1.79597	1.25186	0.819779	1.18112
4	chr1	1492397	2103671	0.718106	0.800378	0.991678	0.925837	1.55396	0.872485	0.937652	0.988362	1.01609	1.18037	0.77409	0.926059	0.962592	1.08617	1.10494	0.772858	1.09561	0.907548	1.38326	1.05584	1.06726	0.964273	1.28698	0.867478	0.542326	0.785532	0.772105	1.37527	0.860722	1.18381	0.997934	0.813878	1.04379	1.62053	0.895872	0.604566	0.88379	0.823476	1.20651	0.549716	0.999875	1.09869	0.814809	1.60367	0.977231	0.605187
5	chr1	2103672	2787808	0.585705	0.658071	1.23537	1.32986	1.01029	1.05717	1.0089	1.01621	1.02231	1.09283	0.764361	0.961923	0.905968	0.656293	1.12333	1.6449	0.847915	1.11052	0.94173	0.595678	0.572823	1.015	1.1383	0.730127	1.04891	1.03518	0.876439	0.9972	1.01078	0.863816	0.82954	0.84825	1.02935	0.7561	0.836913	1.24067	0.733306	0.875528	1.23231	1.03802	0.880158	1.53387	0.95412	0.864491	0.358147	1.02636
6	chr1	2787809	3339607	1.36569	1.90517	1.91906	1.65136	1.08594	0.961921	1.78518	1.12594	1.38032	1.46388	1.2321	1.15632	1.26618	1.27361	1.15838	1.22574	1.68102	1.50595	1.42286	1.39551	2.27939	1.66751	1.85571	1.26251	0.93194	1.60775	1.3713	0.939764	1.40822	2.2977	0.90021	1.40035	0.958347	2.23503	1.20588	1.85982	1.32656	1.63058	1.43013	1.24631	1.23729	1.76187	1.7907	1.1073	1.91519	1.76027
7	chr1	3339608	4076332	1.06615	1.44462	1.47741	1.01535	0.747522	0.895524	1.28229	1.11922	0.965552	0.934865	1.04123	0.927984	1.20135	1.34996	0.832909	1.20113	0.531971	1.34025	0.794539	1.53667	1.07257	1.18457	1.5417	1.19408	0.925997	1.07589	0.949451	0.614527	0.961177	1.37007	0.707515	0.967369	0.883698	0.791862	0.680342	1.22741	0.952327	1.0174	1.06885	1.42714	1.0962	1.00865	0.757855	1.01717	1.02981	1.24821
8	chr1	4076333	4666304	1.35438	1.12637	1.16637	1.00315	1.20798	0.601703	1.39637	1.25912	0.989078	1.47317	1.12829	0.892718	1.02795	1.22962	1.00561	1.00025	1.60047	0.972563	0.902054	0.912245	0.90566	1.15468	1.39939	1.07762	1.1123	1.18357	1.12843	0.833919	1.01185	0.99951	0.65862	0.911573	1.02133	0.818134	0.898675	0.929141	0.744611	1.02267	0.856701	0.786535	1.20782	0.934228	1.07496	0.869016	1.07158	0.938973
9	chr1	4666305	5263403	1.0763	1.09236	0.96124	0.847773	1.21041	0.80959	1.22264	0.955228	0.987073	1.16399	1.08243	0.825885	1.26695	0.798946	1.12729	1.62697	0.969444	0.866453	0.894722	1.16302	1.66524	1.02875	1.2749	0.69376	0.862134	1.25341	0.822013	0.731983	0.725895	1.28684	1.09869	1.00559	1.31007	0.747452	1.11899	1.33453	0.775687	1.20338	0.967479	0.839324	1.83351	0.994887	1.31699	1.0183	0.929314	0.779927
10	chr1	5263404	5841897	1.18038	1.10594	1.05463	0.973344	1.00034	0.808744	0.936114	0.966788	0.981521	1.10451	1.19941	1.16236	1.3641	1.11905	1.21224	1.29308	1.09476	0.916699	1.24848	1.49181	1.09985	1.15607	1.20418	0.846487	1.02212	1.3666	1.11903	1.09545	1.19511	1.33429	0.820201	1.01269	0.976196	1.77143	1.33999	1.38319	1.06815	1.02146	0.877987	0.977104	1.27108	0.858043	0.984622	0.926308	1.17753	1.12456
11	chr1	5841898	6411067	1.14124	1.09956	0.654527	1.00951	1.22128	1.21152	1.05125	1.02362	1.0521	1.14748	0.881396	0.925533	0.93341	1.06968	0.838248	1.32238	1.4003	0.817563	1.27233	0.539848	1.51511	1.02636	1.22213	0.870849	0.964661	0.797219	1.06456	0.995808	1.68386	0.948727	1.32034	1.17443	0.978787	0.614508	1.12804	1.32908	1.19176	1.12711	0.868286	0.585081	0.980949	1.14776	1.26512	1.16268	1.1203	0.622696
12	chr1	6411068	7030623	0.990224	0.888504	1.29358	0.830907	1.02061	1.14096	1.18425	0.999533	1.09806	1.05006	0.689776	1.24269	1.34612	1.05255	1.16266	1.15543	0.697201	0.541103	1.39276	1.04857	1.25151	1.03027	1.38404	1.5256	0.559188	0.746649	1.00347	0.81197	1.07682	0.815458	0.867895	1.22782	1.1091	0.579526	0.955193	1.17615	0.941257	1.08223	1.02055	1.18714	0.800682	0.686528	0.939685	0.793599	1.26255	0.952156
13	chr1	7030624	7535701	1.2514	0.820574	1.62466	1.28669	0.81922	0.722858	1.07896	0.948717	1.11576	0.716083	1.42178	1.04398	0.827168	0.697972	0.938775	0.902193	1.00094	0.41789	1.1761	0.793822	1.24107	0.995317	0.840315	1.1103	0.68482	1.20834	0.767493	0.974011	0.948159	1.09444	0.985053	1.21621	0.96517	0.645322	1.32662	0.988799	0.903039	1.10305	1.0632	1.00118	0.996329	0.833671	0.593723	0.778175	1.25018	1.08639
14	chr1	7535702	8098868	1.19711	1.18424	0.631699	0.937336	1.62824	0.973188	1.15944	1.03703	0.979575	0.638773	0.724731	1.13951	1.05121	0.854812	1.1365	1.03377	1.41227	0.257392	0.982783	0.500265	1.30898	0.954833	0.79458	0.89355	0.684706	0.99798	0.992847	0.81928	1.0315	0.71089	0.816457	0.93004	0.834898	0.995258	1.06885	1.20691	0.771417	0.912452	1.01992	0.951261	0.715595	0.947064	0.617921	0.902281	0.958657	1.40537
15	chr1	8098869	8658301	1.33367	1.01139	0.857394	1.06184	1.16114	1.19248	1.06231	1.01763	1.04756	0.858972	0.984441	0.685205	0.97163	0.9023	0.674558	1.18623	1.01611	0.373244	0.801462	0.909007	0.815236	1.07036	0.977187	0.994416	0.749158	1.13428	1.00209	1.32486	0.852865	0.895257	1.3123	0.984188	1.04905	1.04104	0.776284	0.771598	1.06601	0.803377	0.877856	1.05914	1.12652	1.0437	0.872548	0.946371	0.843219	0.92569
16	chr1	8658302	9247052	0.815669	1.14816	1.1729	1.0946	1.19237	0.957607	0.886549	0.967367	0.913149	0.852469	0.783488	0.928045	1.06334	1.0847	0.770838	0.88146	1.37936	0.520845	1.10622	0.967367	0.834632	0.888173	1.04285	0.941564	1.02049	1.16136	1.02999	1.27506	1.05574	1.05022	0.939219	0.927308	0.703798	1.12743	0.94675	1.25707	0.889593	0.97394	1.38928	1.27247	0.947813	1.00244	1.308	0.837029	1.03967	1.08434
17	chr1	9247053	9827738	1.03271	1.47497	1.17657	1.33148	0.806484	0.784273	1.31065	0.853735	1.0416	1.13717	0.876115	1.04685	1.18739	0.871809	1.09763	0.806512	1.12439	0.487938	1.00623	0.969682	1.07043	0.957096	1.18987	0.717547	1.08425	1.32598	0.894856	0.635409	1.19142	0.768787	0.753608	1.10739	1.10527	0.881448	0.690879	0.798677	0.882995	0.732135	0.796616	1.12773	1.04138	0.8816	0.700088	1.14727	0.903007	1.12587
18	chr1	9827739	10401768	1.03428	0.85496	0.881342	1.13803	0.88452	0.950043	1.03127	0.873344	0.974443	0.997331	1.33587	1.19614	0.950304	1.26252	1.07912	1.14832	1.2764	0.41318	0.846307	0.660366	0.807084	0.87922	0.985766	1.0876	1.05621	1.31876	1.15517	0.812196	0.660817	1.46724	0.892371	0.847793	1.08868	1.97061	1.10204	1.12463	1.24373	1.097	0.74768	1.77649	1.3095	1.05155	0.513005	1.40371	0.766942	1.16178
19	chr1	10401769	10963706	0.916626	1.04218	0.962464	0.630293	1.44313	1.239	1.02672	1.09373	1.1179	0.932131	1.11534	1.28005	1.09153	0.845537	1.03569	1.20968	1.21661	0.439535	0.899152	1.46755	0.88712	1.09673	1.06303	1.40997	0.939015	0.825781	0.947947	0.766369	1.11035	1.20614	1.29171	1.07361	0.762048	0.61281	0.950117	1.56679	0.942845	1.03869	1.4976	1.3228	0.733521	1.0404	1.29346	1.00634	0.783374	0.810913
20	chr1	10963707	11549274	1.28612	1.02968	0.710965	0.979819	1.06957	0.608481	1.03767	0.919873	0.870865	0.880183	1.24674	0.909132	0.7037	0.693623	0.977437	1.63644	1.04924	0.484702	0.924984	0.681012	0.977655	0.956866	1.01183	0.731029	0.930246	0.910675	0.908266	0.631228	0.738423	0.790617	1.32738	0.931387	0.758173	0.909528	0.911872	0.923354	0.975173	0.749098	0.900389	1.0866	0.815358	1.12215	1.26727	0.734233	1.06967	0.614431
21	chr1	11549275	12115795	1.33064	1.05375	1.21295	1.06443	0.924258	1.0109	0.836424	0.988979	0.975445	1.12868	1.01666	0.962125	0.97408	1.02711	0.919061	1.111	0.727953	0.671541	0.976386	1.13584	1.40034	1.03663	0.94866	1.02557	1.82137	0.983578	1.18469	0.4428	0.756449	1.29456	0.644622	1.2208	1.13351	0.701354	1.11281	1.01281	0.831919	0.783919	0.963019	0.986853	1.47047	1.00128	0.933722	1.21528	1.22968	0.961902
22	chr1	12115796	12639080	1.26521	1.26335	1.63196	1.21053	1.08374	1.23211	1.33974	0.982162	1.1668	1.11945	1.21606	1.59964	1.08109	0.801794	1.11642	1.32704	1.22869	0.464353	1.25334	0.680139	1.10661	0.935207	0.994464	1.11608	1.17471	0.970805	0.898077	0.67711	1.1931	1.3446	0.849878	1.10673	1.40192	0.503038	0.81516	1.63388	1.18192	0.973727	1.00346	0.89996	0.992835	1.40169	1.13868	0.964986	0.785937	1.34033
23	chr1	12639081	13185377	1.26902	0.845374	1.3057	0.858953	1.21107	0.833377	0.780807	0.940697	0.906712	0.944694	0.740175	1.20581	0.673474	0.837814	0.956853	1.15438	0.941481	0.804824	0.839925	0.735973	0.587744	0.918186	0.921314	0.751647	1.14724	0.958281	1.23661	0.744248	1.22504	1.31145	0.877768	1.15135	1.2768	0.770088	0.971662	1.08182	0.809932	0.948947	0.664225	1.00265	0.836263	0.984271	0.964329	0.937654	0.618183	1.00501
24	chr1	13185378	13953813	1.08167	1.10849	1.42091	0.887508	1.15148	0.837055	0.936853	0.966213	0.935301	0.667927	0.818164	1.04844	0.997465	0.914145	1.01475	1.40088	1.01295	0.870389	1.1814	0.914753	1.09835	0.833876	0.711594	1.13829	1.1824	0.887079	0.977023	1.07648	0.513126	0.613859	1.124	1.08454	0.852006	0.756251	1.12648	1.18736	0.877164	0.960521	1.4062	0.698259	1.37198	0.75682	0.756355	1.0922	0.852469	0.820715
25	chr1	13953814	14525691	1.07346	0.979372	1.6558	0.527937	0.694371	1.30465	0.830762	0.913623	1.20116	1.25481	1.39928	1.03866	1.07066	1.19862	0.744981	0.856857	0.916521	1.03384	1.49068	0.896443	1.39241	0.917525	0.918989	1.63485	1.30777	1.33742	1.04146	0.557141	0.539213	0.863511	1.15894	1.02359	0.764542	0.588163	1.37518	0.979589	1.0581	0.778117	1.29325	1.27776	1.02831	0.902601	1.28446	0.978021	0.770589	0.694806
26	chr1	14525692	15070084	1.05487	1.08875	1.23655	1.17374	1.03143	1.08764	0.947558	1.07008	1.07128	1.08153	0.837145	0.822145	0.984943	1.08128	1.01327	0.826137	1.20425	1.35307	1.02313	1.29859	1.01932	0.984088	0.944185	1.12082	0.926861	1.11298	1.12923	1.04229	1.36593	1.37042	0.894928	1.14361	1.13054	0.930153	1.02127	1.22024	1.09846	0.872596	1.48009	1.32609	1.17075	1.22583	0.956341	0.966739	0.856238	1.35476
27	chr1	15070085	15637822	1.17002	0.870968	0.907048	1.15198	0.938524	1.03928	0.797863	1.01404	1.00256	1.22888	1.0957	1.28752	1.20844	0.840532	1.14966	1.31636	1.06859	1.0488	0.862827	1.11278	0.741531	1.1131	1.14059	0.956707	1.15041	1.09936	0.959851	1.29587	0.842805	1.14439	0.865353	1.00261	1.01318	0.589236	1.37772	1.48838	1.06067	0.921312	0.878721	0.715089	1.06751	0.853211	1.13879	1.06304	1.34681	0.969955
28	chr1	15637823	16224070	0.923439	1.07481	0.853307	1.29595	1.25109	0.913221	1.13388	1.2356	1.16068	1.04333	1.01484	1.07925	1.10848	1.2142	1.05772	1.28947	1.14982	1.22616	1.16234	1.40975	0.793748	0.984615	1.176	0.864841	0.953432	1.32098	1.09987	0.818378	1.14812	0.969824	1.07696	0.995898	1.04877	0.497307	1.23278	1.11394	0.961213	1.08327	0.915576	1.34743	0.887446	1.1129	1.14708	1.15509	0.995605	1.24297
29	chr1	16224071	16787901	1.04394	1.25435	0.668672	1.28261	0.917917	0.892264	0.777502	1.1669	0.973051	1.0501	0.894894	1.32877	1.12002	1.23494	1.24371	1.11292	1.22888	1.02059	1.19001	0.859207	1.37468	1.13935	0.994622	0.981762	1.04677	1.21842	1.05519	1.067	0.627229	0.910936	0.817093	0.643697	0.941687	1.11788	1.26707	1.28734	0.700604	0.878201	1.21513	1.18489	0.833841	1.16076	1.27431	1.3561	1.11832	1.11812
30	chr1	16787902	17045007	0.624442	0.793659	1.31751	1.24766	0.834027	0.962645	1.15448	0.842732	0.91582	1.15598	1.07243	0.941284	1.09019	0.861369	1.12105	0.803194	1.01834	1.0188	0.94225	0.899648	1.18948	0.803102	0.886789	1.1916	0.975596	1.23746	0.760795	1.03004	0.883823	1.10979	0.86256	0.577927	0.908477	1.07631	0.993717	0.885657	1.10426	1.00266	1.28145	1.30985	1.00652	1.33409	1.06324	1.25496	1.03151	1.13897
31	chr1	17045008	17464646	1.09915	1.28274	1.0362	0.647795	0.914732	0.645653	0.719467	0.978651	1.06237	1.27237	0.647197	0.835335	0.818509	1.00621	0.914476	1.08095	0.710904	0.952727	0.939048	1.22421	1.18232	0.99121	1.24976	0.91073	0.948512	0.991791	0.889715	1.01766	0.664567	0.957768	0.940064	0.913794	1.11319	0.623895	0.750012	1.20756	1.0278	0.839434	0.638226	0.955775	0.686649	1.32326	0.809644	0.695662	1.04563	0.772851
32	chr1	17464647	18018387	0.70922	1.02001	1.11934	1.19206	1.63229	0.802276	1.22286	1.19613	1.02573	0.779577	0.822353	0.910219	1.24834	0.920581	1.05789	0.915517	0.935486	0.966958	0.944518	0.95563	0.923181	0.88562	1.31158	0.709568	0.900248	1.0222	0.941784	1.05735	1.01234	0.83297	0.719882	1.45856	1.26365	1.06796	1.17433	1.0013	1.31754	1.02516	1.0322	0.780997	1.07194	1.06481	1.06133	1.12446	1.06677	1.13045
33	chr1	18018388	18544245	1.2239	0.961912	1.21994	0.879536	1.11489	0.822055	1.06692	0.848581	0.998328	0.799813	0.742666	0.888366	1.07605	1.05855	0.837397	0.903287	0.97226	0.964701	0.958821	0.795394	1.18281	0.930722	0.810983	0.847218	0.863904	0.848368	0.948085	0.944573	0.983611	1.01445	0.725065	1.28373	1.08069	0.861804	1.02425	0.804876	0.904001	1.05786	0.671779	1.28041	0.689999	0.833934	0.750187	0.871222	0.820856	0.57377
34	chr1	18544246	19100010	0.98669	1.39277	0.98731	1.14253	1.19101	1.30153	1.07956	1.13085	1.2725	1.08925	1.35043	0.817049	0.951085	1.02403	1.02829	1.15501	1.2941	1.25428	1.23061	0.894499	0.938413	0.9497	1.59674	1.32022	1.0647	1.05414	0.736661	1.32115	1.08371	1.17042	1.15301	0.933482	1.18775	1.2289	1.14057	1.19976	0.90054	0.803097	1.08685	1.19897	0.992	1.05067	1.03739	1.01485	0.909638	1.21505
35	chr1	19100011	19606896	0.936502	1.32023	0.583332	0.941561	1.36304	1.2503	0.803666	1.34092	1.05111	1.12804	0.860091	0.936963	1.13244	1.00767	1.26599	1.18602	1.07506	0.977024	0.900623	1.49872	1.13398	1.09724	1.27246	0.814188	0.824611	1.22472	1.17591	1.05973	1.14719	1.12162	1.2827	0.679188	1.07553	1.08522	1.25477	1.51055	1.12968	1.11515	1.23164	0.791171	0.78641	1.08864	1.18573	1.54082	0.880474	1.49534
36	chr1	19606897	20137766	1.49912	0.879159	1.21467	0.822048	1.35087	0.981609	1.0056	0.900382	1.11502	1.02173	1.04793	1.023	0.914056	0.796227	0.87781	0.728234	1.72021	1.25119	1.07374	0.853849	0.671461	0.951431	1.12699	0.950606	1.32197	0.922988	1.14133	0.7388	0.921821	0.94393	1.06655	0.678047	1.21704	1.25722	1.00278	0.74572	1.25143	1.30094	1.01906	0.802227	1.20824	0.935338	1.33783	1.23941	1.11546	1.43191
37	chr1	20137767	20657072	0.879406	1.01974	0.964793	1.13116	0.699466	1.35735	0.970464	0.905083	0.991348	1.12903	1.1875	0.816026	1.04687	1.08771	0.75267	0.457696	0.73102	0.859308	1.20044	1.23276	1.09598	0.772157	1.10511	1.03903	1.00024	0.93062	0.810141	0.734194	0.946919	0.719071	0.85812	1.62794	0.933913	1.45586	0.954025	1.23679	0.793738	0.690888	0.923407	0.88491	1.25626	0.865046	0.873925	0.904042	0.95236	1.01713
38	chr1	20657073	21191910	0.765663	0.747997	1.23256	1.2259	0.964547	1.01499	1.09309	1.02507	1.09144	0.967576	1.27455	0.941128	1.04538	1.25169	0.873922	1.59938	0.762358	1.10167	0.886551	1.65927	0.977519	0.933623	1.60344	1.16603	1.14986	0.914878	0.960193	1.02663	0.652202	0.941358	1.15943	1.42225	1.56399	0.77365	1.24583	0.970766	0.892873	0.847128	1.00312	1.01209	1.17693	1.1516	0.903831	1.14757	1.14122	1.09835
39	chr1	21191911	21771209	1.08976	1.02539	0.731975	1.03299	1.06241	1.51576	0.993928	1.01387	1.0414	1.02961	1.18364	1.04351	0.942857	0.867344	0.566017	0.911252	1.06018	0.880574	0.583669	0.913054	0.940499	0.883544	1.40929	0.752609	0.945039	0.973908	0.788899	0.963552	0.871544	1.0148	1.26339	1.42379	0.936094	0.944313	0.933682	1.22105	1.11391	0.561104	1.41253	0.890525	0.673591	0.851252	0.959529	0.870324	0.890866	1.18804
40	chr1	21771210	22320818	1.02086	1.26559	1.11688	0.76631	1.164	1.0148	0.703462	0.952351	0.937825	1.02132	0.97088	0.72151	1.00508	1.20976	0.975484	1.37076	0.93845	0.703718	1.10334	1.10597	0.804855	0.954747	1.08846	1.26744	0.899867	1.09782	0.992717	0.909228	1.01083	0.903413	0.910821	1.18509	1.04259	1.40192	0.989244	0.67655	1.36437	1.02549	1.27409	1.14164	1.10305	0.930049	0.934913	1.03728	1.21719	1.1826
41	chr1	22320819	22870773	0.882582	0.875686	0.748213	1.13823	1.08723	0.674287	0.96666	0.97801	1.00597	1.18405	1.15586	0.89869	0.96225	0.930355	0.715187	0.945414	1.23117	0.763353	0.775019	1.01657	1.0737	1.14733	0.980212	0.833568	1.24219	1.00977	0.950694	0.905845	0.578709	0.685276	0.97742	0.710947	1.13966	0.782868	0.820938	0.989252	1.00672	0.640427	1.07617	0.826076	1.27419	1.04524	1.23786	0.664218	1.03101	0.949913
42	chr1	22870774	23425045	0.853336	0.700642	0.60937	1.47521	0.688223	1.41304	0.772744	0.923582	0.862002	0.881538	1.11292	0.949536	1.0134	0.7827	1.10219	1.21625	0.728166	0.642946	1.25627	0.893347	0.908398	0.901607	0.720372	0.872602	1.06559	0.784789	0.835214	0.852411	0.880673	0.648674	0.898295	1.04728	0.937071	0.645495	0.758175	0.680009	0.921265	0.988269	0.839431	0.778812	0.728128	0.94638	1.21876	0.961553	0.820503	1.1167
43	chr1	23425046	23996176	0.879289	1.40169	1.36556	1.27445	0.728918	1.13191	1.17938	0.937191	1.08883	1.26172	1.01576	0.902177	0.972247	1.0489	1.06301	1.07168	1.07455	0.498299	0.898758	1.35041	0.786603	0.913946	0.99232	0.970259	1.22328	1.11974	0.914283	0.883671	1.18161	1.28787	1.03403	0.983929	1.04954	0.74569	1.147	1.24773	0.878882	0.803978	1.20823	0.716394	0.827148	1.17723	1.12131	0.748786	1.34241	0.899006
44	chr1	23996177	24601474	0.952194	1.28524	0.827535	1.17866	1.12539	1.06538	1.12072	1.2169	0.85223	1.28855	0.95006	1.22117	0.958338	0.901094	1.38699	1.19823	1.24502	0.732646	0.863461	0.815272	0.312197	1.03693	1.12579	1.51682	1.09156	0.972823	1.01615	0.956048	0.61933	1.0284	1.08654	1.21639	0.984799	1.03507	0.810739	1.22886	0.988733	1.33062	1.31402	0.871291	1.20027	1.08935	1.16155	1.29283	0.830247	0.607493
45	chr1	24601475	25144932	0.479245	0.805137	1.0888	1.58704	1.00205	0.922599	1.06472	0.967042	1.07096	1.16039	0.962224	0.871697	1.32975	1.05902	1.01152	1.11696	0.815184	0.931618	0.916999	0.879073	0.831236	1.22285	1.00424	1.25366	1.19574	1.02165	0.995309	1.00899	0.911523	1.04168	0.918592	1.1674	0.68944	1.04574	1.08182	0.772297	1.26094	0.960974	1.02484	0.735667	0.708623	0.872738	0.366941	0.860795	1.18108	0.579313
46	chr1	25144933	25701803	0.992164	0.810346	0.841168	0.782365	1.36688	0.894194	1.02993	0.913762	0.963403	1.07992	1.28449	1.08808	1.14536	1.17571	0.924728	1.47022	0.931867	0.834905	1.02653	0.982988	1.2359	0.904475	1.28799	0.89777	1.10658	1.18895	1.12559	1.48305	0.911132	0.73954	0.962795	1.00282	1.11805	0.651044	1.07753	1.10008	0.708639	0.88814	1.09516	1.01628	1.3432	0.952627	1.19157	0.837897	0.593626	1.10073
47	chr1	25701804	26231254	1.15853	0.714213	1.2846	1.01665	1.10245	1.01801	0.994714	0.995352	0.946523	1.06094	1.07593	0.700414	1.09463	1.03239	0.90669	1.51636	0.992128	0.8896	1.29585	0.636742	0.673961	0.837719	1.07961	1.04687	0.86181	1.02637	0.934859	0.667565	0.888115	1.29801	1.27663	1.55446	1.12558	1.67124	0.889804	1.49031	0.722954	0.995731	1.16257	1.23631	0.921314	0.900757	0.890286	0.948941	0.904823	0.848175
48	chr1	26231255	26818114	0.871806	0.900823	0.884912	0.911928	1.20333	0.821691	0.958148	1.09393	0.974049	1.12438	1.21116	1.00217	1.19524	0.959099	0.765789	0.82922	1.05898	1.2691	1.10221	1.17714	0.967238	1.09706	0.83888	0.917916	1.04086	1.24224	0.983217	0.719538	1.05728	0.913575	0.975831	0.83784	1.03132	1.04992	0.607607	1.05879	1.01479	0.964193	0.93014	0.867418	1.35023	0.968071	0.882335	1.1261	0.750605	0.876141
49	chr1	26818115	27421923	1.28562	1.22005	0.479383	1.16555	0.912982	1.62459	0.94088	1.02117	0.999734	1.34032	1.09916	0.946754	1.14822	0.894163	0.765845	1.14668	0.517198	1.04774	1.06643	0.665111	0.756595	0.794016	1.21872	1.14252	1.0991	0.85883	1.09287	0.932005	0.691573	1.24185	1.40814	1.15422	1.35767	0.76961	1.10716	0.922144	0.889099	0.805292	0.836509	1.01039	0.889975	0.985882	1.00053	1.08138	1.18347	0.836598
50	chr1	27421924	28012622	1.1068	0.970436	1.12733	0.972139	0.897962	1.15568	1.01991	0.901784	0.953102	1.34304	1.16694	0.781201	0.950264	1.34368	1.04117	1.30075	1.1624	0.542511	1.15548	0.998432	0.697664	1.11831	0.961627	0.788434	1.07462	1.3928	0.875795	1.17745	0.78653	0.927146	0.780588	0.849085	0.992605	1.23207	0.959242	1.65804	0.923513	0.579816	1.09432	1.00141	0.748585	1.15539	1.06117	1.16665	1.263	0.775577
51	chr1	28012623	28574773	0.989871	0.887738	1.34532	0.842153	0.853518	1.0059	0.816381	0.761964	1.02964	1.09808	1.16027	0.831721	1.21836	1.06951	0.871027	1.6599	0.98766	0.560025	1.40074	0.849588	1.27949	0.792186	1.12021	1.01686	0.99312	1.03377	1.00041	0.957581	1.09696	0.847085	1.25349	0.905628	0.89756	0.671026	1.2294	0.792625	1.08601	0.805217	0.964742	1.23026	0.718767	0.958214	1.13647	1.03876	0.753888	1.27248
52	chr1	28574774	29208302	1.07298	1.24791	0.842418	1.4585	1.01221	0.975092	0.881484	1.05937	1.07249	1.38699	1.35434	1.21042	1.00598	0.881991	1.01581	1.0858	1.01446	1.06951	1.00127	0.876589	1.339	0.891732	1.22235	0.783774	1.17657	1.18154	0.969714	1.234	1.40246	1.12281	1.06008	1.11604	1.03451	1.57942	1.31674	0.881082	1.08812	1.00264	0.918387	0.769942	1.60514	1.12333	1.12216	1.26343	0.660247	1.16584
53	chr1	29208303	29779538	0.74516	1.29624	1.38443	1.19329	0.541537	0.839735	1.08805	1.01056	1.04258	1.05832	1.11176	1.00296	1.16806	0.799005	0.890116	0.983865	1.1818	0.972902	1.12828	1.0736	1.00485	0.958705	0.931138	0.976457	1.13315	1.05957	0.917971	1.09819	0.726	0.808726	0.857565	1.07272	0.982577	0.841006	1.08423	0.682037	1.33688	0.953534	0.784513	1.0174	1.00338	0.952549	1.13757	1.19195	1.18959	1.15651
54	chr1	29779539	30452198	0.938842	1.3276	1.44248	1.30686	0.590829	1.20703	1.0465	0.947735	1.0381	1.56661	1.31519	0.890123	1.16393	1.00385	0.818473	1.32935	0.971499	1.04503	1.26103	1.31074	0.696582	1.18854	1.11815	1.19305	1.21173	0.994472	1.21741	0.979362	0.829395	0.751012	1.11616	1.04326	0.891176	1.28244	1.05587	1.11848	0.84055	0.838767	1.12389	1.02619	1.18921	1.06641	0.790157	1.33531	1.32162	0.969206
55	chr1	30452199	30981922	1.08013	1.36552	1.12761	0.944722	1.15602	1.14347	1.01612	1.06265	0.939457	0.989564	0.921725	1.1056	0.946541	1.23345	0.941014	1.22125	0.93058	1.19273	1.09267	0.856757	1.07285	0.832791	0.889453	1.16609	1.09276	1.21154	0.986835	1.04291	1.36613	1.1181	1.26833	1.20956	0.951075	1.24066	0.958132	1.13842	1.06882	1.19214	1.22933	0.814299	0.936629	1.18509	1.34966	1.16857	0.784588	1.09946
56	chr1	30981923	31519969	1.02148	0.925465	0.69553	1.28194	1.33357	1.39092	1.21241	0.921976	1.31234	1.23669	0.854455	1.03604	1.28966	0.838179	0.793835	1.14544	1.9264	1.32214	1.33722	0.864623	1.15607	0.928964	0.855544	0.912174	0.875426	1.29722	0.877758	0.764172	0.718965	1.17715	1.3311	1.18825	0.907088	0.632381	0.881451	0.972427	1.18407	1.11413	0.897286	1.27776	1.00065	0.577288	0.593584	1.30021	1.18202	0.962652
57	chr1	31519970	32096490	1.10142	1.02776	0.799972	1.28026	0.857118	1.1282	0.958151	0.959644	1.1007	1.0243	1.42846	1.11528	0.926631	0.974941	0.666673	0.827345	1.49531	0.864482	1.35201	0.803666	1.20802	1.08812	1.11555	1.40918	1.17904	1.21545	0.999687	1.00331	1.06504	1.41042	0.988251	1.46812	1.09016	0.556361	0.657808	0.982801	0.921992	1.14087	0.676709	0.685505	0.995864	0.846824	1.18783	1.06829	1.70453	1.07264
58	chr1	32096491	32625382	1.10492	1.33344	1.26749	0.83274	0.596179	1.22363	1.03577	0.716433	1.09761	1.04732	0.722596	1.24997	0.661431	0.995364	0.973812	0.644953	0.945088	0.639043	1.12484	1.03839	1.05736	1.01483	1.11341	1.39533	1.24773	1.27927	0.986153	1.05227	1.13727	0.782493	0.768444	0.910929	1.14901	0.961065	1.35009	1.46837	1.00613	1.13802	0.836809	0.85129	1.3836	1.18991	1.36521	1.08283	1.06146	0.894616
59	chr1	32625383	33223021	1.11587	0.987182	1.26378	1.301	1.09617	0.916471	0.851211	0.797451	1.1943	1.53427	0.550772	0.876835	1.38242	1.05334	1.25084	1.47743	1.413	0.802487	1.29929	0.79484	0.683449	0.93322	0.879957	0.993699	0.904839	0.909906	0.94983	1.03798	0.789427	1.4975	0.737826	1.26234	0.996784	1.08587	1.03595	1.76764	0.707569	1.29245	1.14798	0.67632	1.02195	1.20014	1.41251	1.00703	1.29048	0.902024
60	chr1	33223022	33787824	0.765766	1.09032	0.858464	0.697988	1.02693	1.00637	1.08984	0.863963	1.0025	0.671162	0.492511	0.870971	1.0331	0.713225	0.940314	0.574142	1.19086	0.576236	1.05504	1.00518	0.670112	0.764047	0.873867	0.79168	0.948642	0.767011	0.814025	0.883761	0.590862	1.01493	1.00622	1.01783	0.745757	0.94488	0.888107	0.802213	0.930829	0.938102	1.09849	0.849266	1.16568	0.799693	0.809809	0.814981	0.652087	1.45036
61	chr1	33787825	34312960	1.11518	0.932788	1.15163	1.0275	0.876586	1.05855	1.06063	0.742689	0.940987	0.740488	0.753747	1.16841	1.01211	1.39184	0.719453	1.4394	0.662616	0.802432	1.16726	0.88254	1.45036	0.933653	0.780211	0.694478	0.806939	1.01267	1.1222	1.03757	1.39463	0.860124	1.3163	0.76389	1.34628	0.814217	1.23535	1.02959	0.979838	1.15601	0.968518	0.900723	0.988468	1.26229	1.08864	0.83945	0.958669	1.27224
62	chr1	34312961	34842725	0.75651	1.12305	0.666286	1.26183	1.12874	1.14098	1.0688	1.02486	1.22604	1.09167	1.15877	0.95661	1.08934	1.03438	1.14737	1.14382	1.03467	0.708466	1.10557	0.788385	0.874986	0.957	1.1194	0.810433	1.31968	1.11203	1.08648	0.929185	0.814296	1.07323	1.36218	0.860972	1.12517	0.904656	0.835129	1.10682	1.10167	1.31869	0.939842	1.36599	1.36676	0.860584	0.970791	1.28571	0.627557	1.00062
63	chr1	34842726	35408055	0.807525	0.941504	0.554336	1.04916	0.973674	0.883953	1.10311	0.92326	1.11016	0.988467	0.72376	0.721496	1.20629	0.835071	0.993931	0.59099	0.603489	0.721354	0.810007	0.901432	0.506485	1.07201	0.651832	1.17366	0.732976	1.13877	0.912802	0.903027	0.933727	1.32481	0.705906	0.727225	0.748084	0.950234	0.736281	1.30471	0.95567	0.766026	0.685224	0.742604	1.3678	1.0492	0.853236	0.908641	1.21916	0.787538
64	chr1	35408056	36003712	0.50213	1.10544	0.618006	0.801569	1.0638	0.864433	0.981625	0.922616	1.13425	0.920254	0.890571	0.737183	0.815747	1.00443	0.994827	0.826132	1.03996	0.655181	0.849334	0.524546	0.563487	0.969988	1.05364	0.847312	1.11834	1.35266	0.823948	1.09389	1.19467	1.18974	0.94355	1.17462	0.949564	0.884924	0.891776	1.08594	0.991902	1.14846	0.953052	1.16311	1.0034	0.939534	0.591269	1.1267	1.07145	1.2004
65	chr1	36003713	36599470	0.996346	1.1149	0.964942	1.04848	0.748624	0.958142	1.3589	1.26818	1.0523	1.05042	0.749857	1.07687	0.984879	1.36986	0.775263	1.18612	1.35042	0.662447	1.19978	1.095	1.02162	0.960651	0.91527	0.870547	0.947307	1.20455	0.806262	1.37202	1.15102	1.02807	0.988922	1.0015	0.999632	1.0683	1.16683	0.994179	1.01207	1.0108	0.85914	1.09221	0.894776	1.07093	1.10467	1.06828	0.723381	1.00559
66	chr1	36599471	37155519	0.706739	1.04393	0.762054	1.06877	1.25246	0.867001	0.916288	0.812014	0.807227	1.34766	0.933684	1.20778	1.13907	1.13454	0.95852	1.11743	1.19449	0.756819	1.07255	0.988454	1.0724	1.01663	1.08754	1.04639	0.837387	0.923158	0.974812	0.769769	0.911767	1.18485	1.11743	0.972297	0.944365	0.695883	0.922965	0.746114	1.00583	1.26079	0.724599	0.941125	0.945954	0.953179	0.790451	1.24056	0.715864	0.880076
67	chr1	37155520	37693437	1.05284	1.15379	0.84766	1.06178	1.12594	0.987323	0.722378	0.908786	1.08692	1.01605	1.34197	0.865428	0.962396	1.26322	0.777841	1.02977	1.18287	0.40021	0.833813	0.855975	1.02576	0.99369	0.788652	1.03902	0.878738	1.21669	0.874458	0.937576	0.954514	0.965707	0.784168	0.824711	1.00346	0.731951	0.803003	1.31216	1.14164	0.896769	1.12995	0.536404	0.870385	1.29074	1.00579	0.977546	0.740201	0.783756
68	chr1	37693438	38249839	1.46999	1.22641	1.22908	1.07384	1.21613	1.03759	0.913258	0.802405	0.833098	0.443905	1.14988	0.613408	1.08716	1.15438	1.22731	1.65605	0.999555	0.49001	1.43429	1.0666	1.20569	0.810482	1.00765	0.79532	0.69152	0.953066	0.994308	1.24491	0.799861	0.751768	0.719866	0.877309	0.560345	0.72995	0.990042	0.725511	0.975818	0.92326	1.07347	0.821263	1.25645	0.94769	1.101	1.13707	1.21567	0.946562
69	chr1	38249840	38823731	0.736791	0.915413	1.68981	0.831467	1.1938	0.979382	0.924568	1.01478	1.12674	1.0477	1.17613	0.814065	1.28339	1.01723	0.750804	1.13903	0.943381	0.39588	1.24329	1.10045	1.42984	0.987347	0.997154	1.14131	0.82407	0.94445	1.01969	0.819246	1.07332	0.783735	1.34608	1.01295	0.985642	1.10561	1.09602	0.939805	1.20796	0.936889	1.08082	0.981136	0.510654	1.23596	1.11852	1.2817	1.21404	0.839911
70	chr1	38823732	39375246	1.20375	1.14122	0.846971	1.19951	1.09952	1.12567	1.21187	1.07482	1.18898	1.33916	1.14906	0.873344	1.35289	1.34072	0.903056	1.50919	1.21714	0.498586	1.02137	1.65556	0.912257	1.06773	1.28328	1.45638	1.31341	0.755473	1.19268	0.801774	0.893418	0.728384	1.18967	1.34202	1.05834	0.999075	1.06406	1.11963	0.912455	0.785998	0.872366	1.09468	0.953471	1.13178	1.21044	1.08097	1.12348	1.14307
71	chr1	39375247	39959040	1.31951	1.01224	1.46237	0.881739	1.20079	0.882453	0.895561	1.02095	1.02893	0.990695	1.50509	0.877946	0.876097	0.916731	1.04628	1.35742	1.06122	0.483471	0.885022	0.964876	1.30964	0.956849	1.08351	1.25035	0.941719	1.21075	0.981903	1.12034	1.21561	0.912418	1.08323	1.07288	0.949862	0.619685	0.498952	0.912351	0.963892	0.740381	1.06092	0.994184	1.06352	1.39447	0.910916	1.21402	1.2	0.437092
72	chr1	39959041	40536560	1.09682	0.925161	0.827289	0.924979	1.04117	1.75181	0.913255	0.922476	0.987328	1.48162	0.725774	1.31801	1.19535	1.26899	0.598526	0.969846	0.910099	0.408896	1.0465	1.57201	1.151	0.967878	1.06997	1.34449	0.685851	0.809375	1.00521	1.01906	1.33037	0.97568	1.11683	0.997788	1.08574	1.23542	1.39554	1.22283	0.588019	0.706461	1.18774	0.784555	1.15784	0.995114	1.15029	0.989523	1.29229	0.908962
73	chr1	40536561	41101982	1.16443	0.690317	1.14047	1.18513	1.22753	0.947892	0.929414	0.987919	1.00581	0.81693	1.19496	1.02287	0.877017	0.876415	0.809132	0.974869	0.894637	0.563077	0.914963	0.991029	0.644462	0.895197	0.597322	1.33844	0.970567	1.02441	0.856058	1.26411	0.810549	1.15838	0.595198	0.870378	1.17095	0.787123	1.04587	0.675999	0.507525	1.07136	0.710342	0.954054	0.955057	1.29569	1.02639	1.01008	1.04721	0.752148
74	chr1	41101983	41653464	0.760576	0.745198	0.757818	1.27436	1.50878	1.11961	0.850489	1.07849	1.04106	1.15327	0.875422	1.43601	1.11173	0.948477	1.03979	1.3941	1.1063	0.406046	1.20163	0.935191	1.01438	1.02569	1.01182	0.89868	0.783189	0.945959	0.994329	0.807453	1.07797	0.987639	0.943134	1.13062	1.06264	1.1321	0.881445	0.907255	0.950218	1.02021	1.07071	1.06395	1.3348	1.02687	1.07112	1.15075	1.21017	0.578189
75	chr1	41653465	42179477	1.0348	0.897426	1.19361	0.63182	0.936732	0.943064	0.758406	0.875252	1.14923	1.36608	1.29568	1.35285	1.17353	0.953861	1.00253	1.13213	0.639745	0.785654	1.19764	1.32371	0.941172	1.04652	0.850171	0.792407	0.86734	0.996684	0.925776	0.829535	0.860784	1.01902	1.18905	0.906068	0.949774	1.09352	0.708252	0.972672	1.16065	1.30292	0.897823	1.37411	0.811183	0.938164	0.816136	0.860205	1.23528	1.00575
76	chr1	42179478	42724209	0.915361	1.00053	1.00248	1.21172	1.48619	1.13643	0.878467	1.01378	0.8821	0.875077	0.857902	0.870789	1.10779	0.930317	1.09366	1.29067	0.637877	0.792431	0.955656	1.18243	0.909335	0.9489	1.05771	0.847502	0.992027	1.01679	0.834365	1.08133	0.754598	0.650013	1.13912	1.10143	0.890689	1.09342	0.785621	0.753166	0.90691	0.906335	1.19055	0.712818	1.20322	0.942435	1.08379	0.991244	0.779302	1.39566
77	chr1	42724210	43266978	1.13575	1.14598	0.43832	0.974114	1.05654	0.866848	0.871852	0.954292	0.907355	1.27378	0.91572	0.763717	0.862702	0.977383	1.21809	1.11864	1.10176	0.852969	1.10197	0.999418	0.884147	0.892451	1.13926	1.52153	0.989772	0.746573	0.979314	0.952852	0.947371	1.33867	0.905201	0.727419	1.1161	1.25326	1.0143	0.862342	0.977952	1.07292	1.00647	1.00326	1.30801	0.760928	1.06418	0.899138	1.56002	1.28793
78	chr1	43266979	43838843	0.850756	1.05508	0.963057	1.13378	0.665265	0.646025	0.892239	0.976711	1.22236	1.02134	1.00165	0.84704	0.904738	0.959788	0.812998	1.10444	1.20197	0.673364	0.945588	0.737592	0.718907	0.962009	0.853296	0.760442	0.874911	1.08264	1.09136	0.645357	1.17406	1.05466	0.607425	1.35466	0.795769	0.773827	1.02606	0.882572	0.994107	0.91399	0.894773	0.856543	1.14048	0.6866	1.05976	0.728225	0.798924	0.760551
79	chr1	43838844	44369899	0.711264	0.897053	1.01178	0.939971	0.982408	1.40181	0.731516	0.868359	0.694449	0.877407	1.52297	1.36404	0.81515	1.18764	1.23358	0.590288	1.24019	0.629817	0.883251	1.00715	0.766539	0.938855	0.919523	1.05306	0.922624	0.936415	0.918652	0.812223	0.831912	0.961738	1.05373	1.29153	1.15997	0.584725	1.10221	0.801082	1.07187	1.15487	0.783979	0.749448	0.812422	0.907658	0.684822	0.915229	1.14138	1.22216
80	chr1	44369900	44896260	0.988821	0.78644	1.05412	1.12676	1.02407	1.02297	0.828166	0.760018	1.16418	1.17747	1.06207	1.16679	0.822799	1.02488	1.07062	1.22726	0.964798	0.354766	1.10068	0.875503	1.22629	0.915559	1.21056	1.28574	1.34421	0.822113	0.845611	0.837218	1.34762	0.515163	0.935297	1.20063	0.725274	1.02605	0.790812	0.951693	0.880443	0.862437	1.22094	0.940155	0.867846	1.18273	0.671632	0.822808	1.1929	0.791348
81	chr1	44896261	45473401	0.766718	1.06156	1.20999	0.808343	1.31922	0.789459	0.772979	0.931239	1.09779	0.951754	0.783926	0.927115	1.2189	0.69835	0.974838	0.772706	1.21269	0.550945	0.947822	0.940138	0.996516	0.889727	1.14271	0.783496	0.642253	0.922176	0.898103	0.97105	1.02898	0.687273	1.09322	1.12561	1.09602	0.721858	0.848028	1.01377	0.797432	1.10384	1.16211	0.684984	0.881987	1.19136	0.712748	0.922618	1.29389	0.696248
82	chr1	45473402	46086723	1.07309	1.22607	1.06335	0.872727	0.919574	1.09491	0.898127	0.793508	1.07766	1.44107	0.640603	0.703224	1.08289	1.21215	1.03628	1.53876	1.10181	0.757746	0.732245	1.13039	1.03606	0.892479	0.900546	0.921497	0.858916	0.961344	0.948102	0.833297	1.0624	1.19145	1.14726	1.09942	0.871713	0.878699	1.03522	1.07365	1.15157	1.00561	1.32536	1.5732	1.19897	0.910375	1.03663	1.12716	1.48064	1.0716
83	chr1	46086724	46638763	1.10672	0.631089	1.00081	0.817805	0.8624	0.962964	0.867697	0.988498	0.860623	1.32668	1.11331	0.977035	0.891909	1.12211	0.972203	0.605441	1.39689	0.728967	1.03327	0.716945	1.06088	0.985874	0.817457	0.873055	1.10999	1.1671	0.874225	0.678208	0.822587	1.46648	1.12751	0.939172	0.954351	0.797254	0.701497	0.799536	0.958192	1.04195	1.07433	1.55177	1.07683	1.10197	0.960107	0.979438	1.2658	0.970202
84	chr1	46638764	47229412	0.961583	1.14739	1.17118	0.931082	1.17063	0.970474	0.949406	0.909272	0.778262	1.01766	1.04638	0.965359	0.883902	0.912526	0.913804	0.822936	0.679895	0.726805	0.977696	1.09925	1.26695	0.809944	0.885405	0.969767	0.661727	0.76659	0.810377	0.829041	0.80865	0.897856	1.11856	1.03092	1.00662	1.05854	1.09729	0.985473	0.968247	0.754835	0.906877	0.658963	1.12631	0.889251	1.35778	1.14078	0.628282	1.31089
85	chr1	47229413	47818347	0.761395	0.954951	0.997483	0.820708	0.867866	1.12548	1.20935	0.892014	0.901483	0.68439	1.35117	0.657127	1.15808	1.10408	0.801667	0.672535	0.754768	0.40953	0.983064	1.35535	0.917569	0.819111	1.11399	0.705832	0.980383	1.22673	0.985696	1.20243	0.95521	0.799923	0.810132	1.17985	0.899133	0.985773	1.21502	1.43244	0.98856	0.669364	0.936553	0.661934	0.909317	0.83333	0.616529	0.666547	0.840926	1.30522
86	chr1	47818348	48362489	1.0001	1.26559	0.731646	0.993177	0.646453	0.773198	0.967373	0.908212	1.13974	1.16124	1.14745	0.851398	0.952454	0.676524	0.788878	1.14719	0.739403	0.551014	1.12398	1.18862	1.14079	0.920866	0.958075	1.2628	1.45147	0.965784	0.961326	0.966166	0.927207	1.61344	1.12884	1.22089	0.989733	0.62874	1.10963	1.27917	1.04764	0.923162	1.07496	1.06359	0.881902	1.01194	0.742379	0.935632	1.13294	0.896938
87	chr1	48362490	48972064	0.793973	1.28431	0.847105	1.37973	0.897803	0.922243	0.916697	0.992573	0.818262	0.860043	1.0615	0.878314	1.14561	0.834068	0.914423	1.29437	1.02674	0.734082	1.14289	1.04419	0.804573	1.05357	0.794137	1.11538	1.0748	0.853808	0.774251	0.909106	1.04329	1.31674	1.15888	0.981766	0.960165	1.01478	0.622761	0.970592	0.791456	1.24846	1.21964	1.01158	0.881987	1.10701	0.965922	1.21395	0.988813	0.900708
88	chr1	48972065	49493460	1.00059	1.31077	1.04288	1.10541	1.06826	0.83617	1.03722	0.81041	0.989344	1.19076	1.15424	1.1541	1.15093	1.10389	1.00831	0.700004	1.18867	0.60612	0.935804	0.858399	0.914109	0.802884	0.822154	1.04166	0.98741	0.975188	0.965755	0.939461	0.807062	0.822191	1.30361	1.42045	0.705543	0.849448	1.04909	0.974961	1.06973	1.4014	0.927036	0.967222	1.205	0.804671	0.857042	1.09088	0.792397	0.843873
89	chr1	49493461	50109280	0.502313	1.36888	0.810466	1.1507	0.788708	1.30632	0.897007	1.10158	1.09622	0.894798	0.786401	1.21427	1.36751	0.770074	0.988426	0.819907	1.00627	0.787825	0.949747	0.906587	0.800297	0.864436	1.03445	0.741989	0.924852	1.05481	0.78421	0.944083	0.691681	1.2988	0.802335	1.15476	0.476479	0.769538	0.888822	1.2433	1.13858	1.38375	1.4474	1.4588	1.0281	0.986584	0.793643	1.02214	0.73812	0.904911
90	chr1	50109281	50730238	0.828417	0.776206	0.653908	0.658838	1.15931	1.00391	0.924555	1.09259	1.13905	1.10476	0.886638	1.04853	0.761324	1.23012	1.17673	0.718548	1.12133	0.918085	1.12584	1.32329	0.751583	1.07946	1.0267	1.28574	0.953649	1.11394	1.07798	0.878187	0.909827	1.08083	1.19006	0.781265	1.30635	1.23569	0.921108	0.680606	1.00524	1.36033	0.877307	1.13861	0.970522	1.04075	1.01511	0.964065	1.43082	0.58616
91	chr1	50730239	51299293	0.986197	0.96008	1.16046	0.885537	1.22519	1.14527	0.936394	0.951816	0.991252	1.07165	1.27223	1.27144	0.948312	0.966145	0.921837	1.39779	0.705715	0.751552	1.03166	1.01981	0.836729	0.969554	1.00594	0.856671	1.18839	1.32154	1.16054	0.934259	1.12386	0.738577	1.24268	1.01678	0.912618	0.984094	1.06478	0.947517	1.04906	1.37818	1.22814	0.960519	0.712689	1.24078	0.937858	1.23678	1.02018	0.713362
92	chr1	51299294	51904002	0.761336	1.31055	1.02129	0.942033	1.28635	0.856053	0.995809	1.04999	1.17779	1.09381	1.05419	1.09079	1.22086	1.307	0.913336	0.879412	0.924802	1.18371	1.19001	1.02275	0.802803	0.90634	0.590786	0.902583	1.01628	1.25339	1.17608	0.951411	0.881382	0.82746	1.35383	0.743249	0.727306	1.20656	0.969606	0.951051	0.99252	1.12751	1.18235	1.2534	0.781908	1.09912	1.30893	0.951031	0.829578	1.30877
93	chr1	51904003	52463253	0.840269	1.00084	1.02573	1.0521	1.13798	0.971858	0.905462	1.1426	1.05888	1.20166	1.15582	1.1168	1.28197	1.4602	1.0885	0.942678	0.764263	0.846002	1.09346	1.08555	1.24801	1.17949	0.62686	0.998115	1.05913	1.19455	1.28043	0.743409	0.988458	1.53292	1.00491	1.03471	0.809601	1.03014	0.898653	0.876368	1.07346	1.2308	0.98135	1.11852	1.329	1.52335	1.10835	0.916083	1.29513	1.17675
94	chr1	52463254	53030839	1.05529	1.03884	1.39902	1.09223	0.833034	1.0369	0.996054	1.0215	1.20684	0.964598	0.986155	0.915925	1.09049	1.14935	0.520297	1.16534	0.880104	0.933209	1.10949	0.971056	0.548387	1.03028	0.954445	0.919531	0.896163	1.10967	0.998798	0.981573	0.765181	1.15233	1.17089	1.17402	1.02995	0.756898	1.00402	0.871221	1.24604	1.02906	1.18468	0.918017	0.876147	1.12178	1.09559	0.89929	1.22297	1.27885
95	chr1	53030840	53588165	1.16905	0.975703	1.19993	0.960044	0.950081	0.677198	0.744937	0.822107	1.07748	0.623561	0.867169	1.16397	1.19875	1.16496	0.956176	1.05717	0.962791	0.791067	1.06949	0.972705	1.53951	0.992353	0.86888	1.04404	0.962986	1.18308	0.916483	0.852937	0.936263	0.861356	1.01369	0.930045	1.02185	0.883175	0.882882	1.02365	0.872803	0.910738	1.17429	0.828324	0.711811	0.872265	0.899997	1.06211	1.42118	1.09012
96	chr1	53588166	54115281	0.855584	1.1828	0.798162	1.32228	1.07649	1.12172	0.865928	0.944972	0.955511	0.992648	1.24691	1.19014	0.960185	0.98272	0.939837	0.533944	1.06001	0.505558	0.936227	1.18512	1.19499	0.977243	0.871031	0.883581	0.97261	1.24821	1.00023	0.70034	1.09818	0.851349	0.92746	1.20066	0.922986	0.22507	0.885365	0.978186	1.05173	1.06205	1.13476	0.689869	0.755514	0.983613	0.784896	1.10511	0.785318	1.14164
97	chr1	54115282	54649783	0.686871	1.00597	0.852903	1.24396	0.898004	0.728988	1.02518	0.863727	1.10998	1.08754	1.0148	0.901073	1.14105	1.14439	1.22613	1.04584	0.887463	0.516601	1.22098	1.011	0.566054	0.83313	0.848698	0.952556	0.982631	0.930221	1.1072	0.820876	1.0479	1.19723	1.02524	1.06294	1.10064	0.591706	0.70633	0.989843	0.965261	1.19873	1.13713	0.91026	1.43995	0.971335	1.0242	1.1576	0.770516	0.965828
98	chr1	54649784	55211782	0.919487	1.11152	0.98564	1.19628	0.921953	1.1716	1.22486	0.90709	0.857859	0.84173	1.0332	0.938635	0.679923	1.01849	0.763136	0.996253	0.923664	0.789888	1.07538	0.758532	0.878405	0.963987	1.154	0.97709	1.27544	0.946373	1.08734	0.962489	0.875714	0.837366	1.353	1.52246	1.03129	0.656783	0.706419	0.951479	1.30246	0.770919	1.0844	0.902245	0.804341	1.02079	0.816816	1.031	1.02604	1.02025
99	chr1	55211783	55766938	0.790209	1.05349	0.961396	0.595724	0.94725	0.974092	1.12083	0.864295	0.959348	0.829606	0.740001	1.19202	0.897303	1.06483	0.869343	1.0169	0.783266	0.966918	0.827964	0.998112	0.681658	0.944268	1.00034	1.29832	0.793067	1.10812	1.27526	0.953517	1.09274	1.57544	0.678976	1.07153	0.922841	1.0046	0.862851	0.910477	1.16699	0.91828	1.2808	0.587747	0.499812	0.757216	0.733244	0.75125	0.902216	1.0452
100	chr1	55766939	56288049	0.963096	1.05976	1.14257	0.597302	1.16547	1.25393	1.01347	0.913239	0.774427	1.71876	1.07002	0.658948	0.875811	0.894034	1.10105	0.740041	0.747038	0.837403	0.955839	0.693133	0.559901	1.109	1.14788	0.873929	0.854793	0.872784	0.985197	0.932381	1.56293	1.27614	0.833949	0.988786	0.984148	1.35829	1.1078	1.00716	0.65046	1.10855	1.31777	1.0832	0.82171	0.734104	0.912284	1.01858	1.22075	0.992508
101	chr1	56288050	56830750	0.936159	0.827474	1.15787	0.73363	0.799451	1.32672	1.48745	1.04253	0.991468	1.39785	1.30953	1.12991	0.986549	1.29707	0.956142	1.44949	1.28641	1.18173	1.2594	0.863067	0.605776	0.807645	1.20836	1.06436	1.25033	1.38834	1.01833	0.969199	0.91433	0.719267	1.05204	1.15322	0.74168	1.06784	0.770617	0.854025	1.01342	0.802309	1.65686	0.728863	1.58919	0.820753	0.780351	0.859903	1.4096	0.593425
102	chr1	56830751	57386130	1.10513	1.08679	1.07536	1.10899	0.729357	1.83615	1.03675	1.10325	0.764251	1.20879	0.964694	1.22059	1.183	0.954727	0.973973	1.59437	0.648825	1.14179	1.04593	1.00855	1.00074	0.944887	1.0556	0.938468	1.12357	1.0358	0.932705	0.877578	1.00806	1.15655	0.714099	1.28285	1.45084	0.432598	1.13225	1.0279	1.00652	0.936954	1.16164	1.03258	1.05738	1.2576	0.931828	0.77344	0.758648	1.25948
103	chr1	57386131	57895993	0.884407	1.07913	1.19246	0.773138	0.898578	1.34104	1.09543	0.921734	0.981857	1.26735	1.13865	0.995394	1.04924	1.13416	0.829126	0.73441	0.917759	0.718074	1.11626	1.11544	0.906959	0.959195	0.867024	0.826588	0.847227	1.0149	0.913042	1.01921	0.83209	1.03647	1.23211	1.00465	1.28987	0.869777	0.639258	0.862462	0.970101	1.21822	0.603606	1.15426	0.884959	1.31287	0.736029	1.04789	0.57402	0.994205
104	chr1	57895994	58421433	0.748567	1.0429	1.01168	1.09643	1.18154	0.857932	1.08935	0.832113	1.11769	1.27078	0.99454	1.04735	1.1015	1.11165	0.899531	1.59795	0.701519	0.59056	1.01813	0.813816	0.940644	1.00152	0.89243	1.08254	1.18182	1.25138	0.855776	1.21623	0.659111	0.920846	1.18225	1.14969	1.01884	0.439447	1.03881	0.771618	0.981886	0.855103	1.30159	1.05236	0.931446	0.911321	0.630778	0.898373	1.11422	0.946398
105	chr1	58421434	58977395	0.647619	1.11653	1.17704	0.959748	1.10557	0.91701	1.14398	1.00588	0.994945	0.969441	1.24372	0.860384	0.746359	1.16354	0.837958	0.800398	1.03536	0.586177	0.857978	0.877085	1.09872	1.03739	1.20519	1.34739	1.20088	1.09141	1.06805	0.821215	0.940165	0.880436	0.625745	0.883261	0.897018	0.637555	0.671074	1.10209	0.953844	0.960395	1.109	0.926159	0.723324	0.943427	1.04661	1.01321	1.09296	1.0471
106	chr1	58977396	59509713	0.85338	1.53013	0.89708	1.26385	1.04756	1.38938	0.816621	0.906934	1.21356	1.13987	1.10331	0.765241	0.912954	1.04886	0.864026	0.571396	1.28198	0.969803	0.939024	0.970568	0.553685	0.966495	0.912849	1.06429	1.22034	1.0615	0.914375	1.1813	1.03344	0.9755	0.932251	1.15821	0.956561	0.676915	1.01722	0.560225	0.994154	1.1783	1.06247	1.56813	1.01838	0.83444	1.33313	1.01085	0.850661	0.685309
107	chr1	59509714	60055403	0.976757	1.11294	0.863731	0.935817	1.0883	0.765217	1.01364	0.967922	0.947863	1.20079	1.63981	1.1171	1.15883	0.814047	0.801394	1.39688	1.01847	0.884229	1.02899	1.04915	0.816567	0.767629	0.927719	1.01538	1.17839	0.927934	1.13241	0.859505	1.24164	0.668783	1.13505	0.904902	1.01649	0.931273	1.0387	1.03272	1.07631	1.10184	1.69822	1.08642	0.698407	1.13273	1.27108	1.14028	0.910674	1.11528
108	chr1	60055404	60623973	0.858226	1.18224	0.777921	0.618086	0.781448	1.21745	1.10007	0.814313	1.07825	1.07041	0.954945	0.995564	1.15754	0.860094	0.999488	1.17102	1.11269	0.79895	0.894249	0.65011	0.836475	0.999534	1.18379	1.07511	1.49091	0.907761	0.909408	0.967743	0.880922	1.13997	1.44134	0.8551	1.06161	1.2836	1.03882	1.16804	0.968295	1.3157	1.45155	1.26816	0.975977	1.21924	1.04803	1.02377	1.31897	1.18379
109	chr1	60623974	61205575	0.678678	0.988998	0.886814	1.19332	0.974884	0.875603	1.13601	0.815341	1.06495	0.880268	0.907607	0.942174	0.963983	0.849673	0.807401	1.19948	1.35285	0.848556	0.711681	1.0921	0.912071	0.875973	0.798575	0.810647	0.827859	0.76573	0.932171	0.831816	1.22379	1.14643	0.888117	0.83781	0.889958	0.794581	0.699873	0.844015	0.904469	1.02996	1.1193	0.875607	1.13883	1.21875	1.30355	0.861534	0.983548	1.03527
110	chr1	61205576	61782793	1.2989	1.06873	0.844308	0.675641	1.2133	0.914047	0.743855	1.03326	0.970165	0.772003	0.925732	0.850654	0.939026	0.844712	0.722617	0.87114	0.930309	0.788254	0.918907	1.00581	0.889112	0.741905	1.04042	0.936913	0.856382	1.05782	0.86252	0.67039	0.859513	1.07624	1.12512	0.851791	1.17667	0.423943	0.681333	0.824671	1.05432	0.929221	0.977147	1.05241	1.08209	1.33424	0.913887	1.01793	1.13956	0.98904
111	chr1	61782794	62344198	0.819461	1.1366	0.792533	1.03217	1.11444	1.16289	0.861451	1.08709	1.09209	1.42746	1.37919	0.933735	0.957989	0.96749	0.835454	0.808808	1.00222	1.17298	0.977689	1.24313	0.854711	0.924964	1.04964	0.784132	0.853486	1.03168	0.789719	1.57396	1.17085	1.5683	0.859425	1.12425	1.08048	0.904988	0.815737	0.93924	1.37787	1.1254	1.02501	0.967661	0.625551	1.12319	1.18867	0.858465	0.915234	0.597014
112	chr1	62344199	62906604	0.853147	1.02108	0.630602	0.992642	1.29015	0.714449	1.12213	1.0059	1.10432	1.19399	1.08145	0.804757	1.01898	1.08032	0.854441	1.04432	1.0212	0.832723	0.902172	0.984863	0.720732	0.847989	0.803984	0.933948	1.27233	0.916802	1.01304	1.33854	0.956307	1.28306	1.21197	1.22365	0.806293	0.521129	0.784842	0.705136	1.01924	0.982972	1.04998	0.941633	1.1896	0.979878	0.813713	1.1389	0.941096	1.19782
113	chr1	62906605	63478235	0.685821	1.14033	0.4445	0.84906	1.26233	0.988369	1.18787	0.928566	0.986438	1.30147	1.48278	1.32954	1.02796	1.14843	0.769077	0.975728	0.834329	1.1205	1.32285	1.00969	1.14981	0.828249	0.916649	1.11425	1.11698	1.50858	0.940799	1.16687	1.17241	0.877832	1.09098	1.12835	1.17618	1.55894	0.635687	0.742116	1.33867	0.925288	1.63613	0.847393	0.879629	0.838555	0.8528	1.21582	1.22813	0.886648
114	chr1	63478236	64071010	1.07551	0.946632	0.915925	0.883144	1.65032	0.824071	1.04402	1.04023	0.995463	1.26886	1.09059	0.776918	1.23478	1.00169	0.58661	1.22791	0.72294	0.880269	1.22888	1.13572	0.715524	0.878095	0.992943	0.835419	0.941098	1.02591	1.11869	1.13831	1.13908	1.14826	1.03767	1.36469	0.951886	0.95617	1.26798	0.549007	1.24083	0.931057	1.05575	1.08209	1.02184	0.815587	0.952051	1.22385	0.841589	0.794132
115	chr1	64071011	64590948	1.19997	1.18072	1.15356	0.826237	0.931138	1.18135	0.898819	1.09038	0.930343	1.15915	1.35211	1.17164	1.16199	1.0098	0.814613	1.1747	1.06008	0.946462	0.9541	1.13656	0.965453	1.01927	0.978266	0.982417	1.4701	0.981314	0.855719	1.1576	0.766389	1.13104	1.21067	0.993718	0.688524	1.1652	0.922955	0.863157	0.949891	1.15923	1.17816	0.956332	1.17491	1.20951	0.941203	1.1362	1.25986	0.871861
116	chr1	64590949	65152884	1.29397	1.1651	0.902539	1.05695	0.958578	0.691487	1.09048	1.11587	1.00078	1.11679	0.951349	0.714433	1.14377	0.808242	1.08419	0.604128	0.666286	0.904014	1.42535	0.809337	0.881298	1.16488	1.18897	1.06776	0.79943	1.12851	0.957992	1.23093	1.19541	1.38642	1.07124	1.24843	0.809652	0.979025	1.19878	0.859019	1.10705	0.876932	1.20825	1.43136	0.897571	1.02973	1.02022	1.10742	0.814993	0.939816
117	chr1	65152885	65719562	0.756283	1.20203	0.852572	0.985677	1.28646	0.822907	0.893776	1.0325	0.990019	1.334	1.3892	0.846115	0.799301	1.39826	0.954332	0.984413	0.768535	0.814188	1.16235	0.948773	1.0545	0.937303	1.07865	0.955917	1.55389	0.945108	0.999996	1.04358	1.03726	1.36641	1.10483	0.929581	1.20614	0.992375	1.26079	1.04843	1.21491	0.8127	0.909159	1.0161	0.959448	1.23216	0.924868	1.04344	0.64721	0.815599
118	chr1	65719563	66308609	0.878274	1.05393	0.720335	1.01397	0.84457	0.862955	0.883901	0.780321	0.960217	1.02912	0.932892	1.28717	0.955866	0.976869	1.09798	1.16355	0.764742	1.02816	0.950373	1.13908	0.712731	1.03249	0.786814	1.15991	1.09407	1.03817	0.911023	1.11364	1.19372	1.23806	0.923218	1.25125	1.10884	1.19808	0.942064	0.894559	1.30515	0.960606	0.938313	0.858723	0.971517	1.56511	0.786169	1.34914	0.512411	0.992677
119	chr1	66308610	66864235	1.17728	0.950452	0.655846	0.749271	1.42577	1.00041	0.815885	1.1104	1.04011	1.13496	0.864256	0.763402	0.893077	0.935041	1.03637	1.1401	1.45451	0.526819	0.813023	0.757831	0.604404	1.14096	1.24669	1.21359	1.29507	1.01955	0.865258	0.747778	0.606795	1.48071	0.930673	1.02342	1.1581	0.601203	1.19837	1.29224	1.22743	0.895454	1.34285	0.672905	0.6025	1.34661	0.993605	0.786568	1.09008	0.964378
120	chr1	66864236	67398338	0.967316	1.16179	0.849256	1.40391	1.42991	0.96545	0.983908	0.949481	0.966608	0.919095	1.12859	1.21291	0.954292	1.01305	0.908133	1.13041	0.765819	0.542916	1.2154	0.902644	0.959822	0.957834	1.08633	1.0297	0.975176	0.860195	0.793135	0.995468	1.06328	1.11019	1.5182	1.12556	0.791741	1.04725	0.608435	0.743874	0.76805	0.997425	0.944739	1.09755	0.848376	1.15386	0.919143	0.990604	1.1244	1.01285
121	chr1	67398339	67973173	1.22556	0.96852	0.636564	1.03097	0.928879	0.818007	1.11919	1.03532	1.16612	1.60769	1.20935	1.1483	1.17871	0.899431	0.999485	1.44232	1.08622	0.720547	1.1751	1.24055	1.50338	0.986551	0.885104	1.21592	1.22184	0.94527	0.898056	0.893438	0.983816	1.28521	1.09416	1.30975	0.879499	1.31858	0.921065	1.13332	0.953168	0.919141	0.990983	0.995896	1.15731	0.988794	0.758857	1.12772	1.39118	1.03137
122	chr1	67973174	68517982	0.881293	0.961809	1.304	0.818028	1.05948	0.851505	1.11346	1.00365	0.973823	1.10033	1.03562	0.771625	1.01861	0.98713	1.07095	1.1559	0.572504	0.656644	1.07056	0.792333	0.793282	0.861888	1.07874	1.12831	0.927152	0.972002	0.789424	1.05737	0.979201	1.21058	0.816282	0.928673	0.91363	0.801568	0.753929	1.31956	1.07456	0.970566	0.98804	1.04316	0.979575	0.829042	0.861061	1.08413	0.856518	0.545884
123	chr1	68517983	69051249	0.808138	1.25549	0.797489	1.35935	1.11416	1.14226	1.02028	1.01591	1.02149	1.0276	0.654995	1.25486	0.913244	1.11957	1.05515	0.694287	1.25537	0.648636	0.815786	1.05466	0.841853	0.943781	1.2833	1.34073	0.660722	1.1777	0.997816	0.772018	0.703444	1.05362	1.34493	0.967826	0.858254	0.75293	0.656635	1.34943	1.1389	0.815496	0.933501	1.33585	1.3053	1.02616	0.752284	1.01092	1.16128	1.19921
124	chr1	69051250	69658870	0.835532	0.956009	0.973651	1.02779	0.699917	1.09231	0.854218	0.936266	1.00424	0.78662	1.00086	0.813256	0.785508	0.669279	1.26809	0.965591	0.631729	0.683174	0.921593	0.905371	0.57916	1.16001	1.09665	1.04617	0.916654	0.992934	0.921201	0.964993	0.969548	1.00355	0.839706	1.14667	1.17027	0.962012	0.632838	1.3571	0.97773	1.10268	1.00548	1.1949	0.762135	0.882548	0.681145	1.00886	0.99855	1.09165
125	chr1	69658871	70267849	1.13137	1.06746	1.02081	1.05959	1.29125	0.547486	0.878173	0.972782	1.02239	1.30627	1.52481	1.09061	1.02958	1.01605	0.874612	0.950014	1.03306	0.390798	0.900774	0.932244	1.01477	0.994	0.835504	1.30573	1.04831	1.11242	0.835999	0.69997	1.31006	0.980832	0.883508	0.977736	0.661098	0.883463	1.34	0.93493	1.08039	1.20355	0.935004	1.05085	1.18739	1.01723	1.13376	1.0378	0.869375	1.13235
126	chr1	70267850	70848853	0.964034	1.02184	0.915964	1.22188	0.701727	0.813802	0.674601	0.827005	1.1657	0.809218	1.20147	1.08783	0.935131	0.868323	0.735901	0.731503	0.989498	0.669913	1.04414	1.02237	1.01039	1.08553	0.868675	1.15181	1.06071	0.955406	0.897795	0.852169	0.907105	0.952629	0.619065	0.875008	1.06282	0.896749	0.852692	1.43519	1.1365	1.21656	1.11741	1.25115	1.03953	1.19257	0.894713	0.883605	1.22356	1.65279
127	chr1	70848854	71446267	1.18484	0.946681	0.991839	0.614142	0.97623	1.25464	0.969904	1.00296	0.993879	0.926687	1.07757	1.05306	1.1486	1.15355	1.3304	0.934793	0.940801	0.657278	0.901766	0.911429	1.10341	1.246	1.09704	1.02043	0.881501	0.866825	0.758521	1.05819	0.893458	0.913263	1.08951	0.825359	1.32309	0.889905	1.01343	1.56929	0.933952	1.09015	1.23043	0.897675	0.946036	0.897711	1.25488	1.13648	1.00588	0.951313
128	chr1	71446268	72018120	0.757933	0.834917	0.896786	0.746607	1.1355	1.15078	0.735051	0.94678	1.21837	0.960684	0.967859	1.14542	1.42802	1.02072	0.765906	0.874452	1.37868	0.751741	1.3147	0.920286	1.0756	1.08537	1.12592	1.27631	1.05496	1.13079	0.815223	1.08022	0.882943	1.04076	0.883635	1.07359	1.10409	0.897547	0.838722	1.02885	0.847915	0.933423	0.830186	1.04428	1.26867	1.02543	1.13261	1.18174	1.02108	1.05215
129	chr1	72018121	72631371	1.16702	1.01943	0.464471	0.703521	0.582536	0.886931	0.825702	0.922422	1.02942	0.923686	1.04892	1.2732	1.11921	1.02848	0.722603	1.00613	1.10545	0.71911	0.971533	0.971913	1.05573	0.836776	0.8057	1.25844	0.918953	0.935294	1.09259	1.15696	1.06984	0.875797	0.74557	0.63191	1.04594	1.32667	1.13634	0.802051	0.958552	0.951381	1.20309	0.864866	1.06588	1.10582	0.98122	0.628082	1.12817	1.11917
130	chr1	72631372	73266160	0.929643	0.847053	0.914265	1.12057	1.30269	1.18863	0.96227	1.00828	0.90719	1.27104	1.33192	1.03902	1.05748	0.927424	0.80912	1.20819	0.938636	1.05485	0.921287	0.882927	1.1905	0.954833	1.11242	0.955768	0.870676	1.01689	0.931387	1.05197	0.592142	0.958116	0.871395	1.23209	1.03729	1.11958	1.04912	0.849846	1.23556	1.03476	1.07617	0.880673	0.965173	1.15309	0.910274	1.11709	1.12228	0.982601
131	chr1	73266161	73881859	0.778649	1.11612	1.02476	0.906203	1.21952	0.857144	0.971088	0.918701	1.1336	1.04297	0.729964	1.05061	1.13358	0.85942	0.922202	0.909336	1.31703	0.578725	0.990811	1.06314	1.12942	0.917564	0.992851	1.20257	0.676276	1.13142	0.856931	1.32894	0.916501	1.0316	0.897812	0.738536	1.01128	1.23517	1.1521	1.03798	0.763627	0.819797	1.04906	1.07777	1.06689	0.86223	1.08345	1.23837	1.13579	1.04394
132	chr1	73881860	74499535	1.02844	1.27587	0.860058	1.15163	1.11228	1.2532	0.798683	1.18911	1.03016	1.27587	0.990562	0.991491	1.11916	0.821378	0.886032	1.05681	1.32828	0.558515	1.22227	1.08436	0.961216	0.881736	1.04456	1.13496	1.04505	0.830992	0.801992	1.21389	0.914004	1.17498	1.30438	1.14375	1.29691	1.55547	0.959463	1.13428	0.716678	1.62817	1.06138	0.921502	1.01432	1.2291	1.23375	0.97999	0.776307	0.762333
133	chr1	74499536	75105554	0.708985	0.773797	0.902715	1.27987	0.765872	1.47096	0.750102	1.08669	0.851274	1.0619	1.49328	1.25287	1.07087	0.905991	0.769058	1.04032	1.5214	0.952285	0.927893	0.801404	1.09953	0.98077	0.856562	1.04036	0.89299	0.926024	1.16991	1.08178	0.86493	0.831334	0.864824	0.973946	1.06612	0.851182	1.00108	1.53189	0.865802	1.13525	0.97302	1.22707	1.07365	1.03861	0.861106	1.14245	1.15793	1.16759
134	chr1	75105555	75698992	1.18495	1.33854	0.601233	0.972267	1.21902	0.879661	0.923909	0.954584	1.04805	1.41259	1.2228	0.975783	0.910409	0.971434	0.985262	0.858772	1.33329	0.92012	1.10422	0.946546	0.787598	0.889944	0.949684	1.35199	0.875946	0.958967	1.01239	1.24974	0.814797	0.894823	1.0631	0.74588	0.920189	0.860895	0.81063	1.09806	0.974494	1.02791	0.876113	1.18258	0.677814	1.15163	0.894879	1.3042	0.883456	0.976695
135	chr1	75698993	76329115	0.85524	1.21929	1.175	0.951325	0.86236	1.01559	0.960935	1.12858	1.11238	1.05517	1.52906	1.38905	1.08664	1.12157	0.999801	0.858483	1.14527	0.74804	0.915004	1.06562	0.855399	0.898632	1.06712	0.939726	0.977106	0.935291	0.876258	1.40213	0.79432	1.08945	0.824196	1.14819	1.0853	1.03554	0.630749	0.992254	0.990837	1.34443	0.856939	1.04267	0.78927	0.979909	1.23403	0.926765	0.975572	0.73036
136	chr1	76329116	76902390	1.02261	0.977232	1.08177	0.874907	1.36741	0.700653	1.03535	0.982062	0.96353	1.29641	0.881668	0.886021	1.02604	1.54849	1.13838	1.36868	1.18253	0.776597	1.21855	0.832394	0.858528	0.84693	0.949204	1.11517	0.693367	0.981438	1.00572	1.14063	1.15701	0.88691	1.15632	1.19787	1.08479	1.23919	0.779751	1.07655	0.857346	1.02452	1.02815	1.12052	1.40544	1.05117	0.712777	1.12194	1.25465	1.16003
137	chr1	76902391	77452830	0.918597	0.84124	1.05931	0.804633	0.947634	0.840396	0.802838	1.21079	1.05393	0.836918	0.901719	0.913323	1.39899	1.0116	1.08849	1.20274	0.887105	0.88458	1.11034	1.26039	1.13319	0.969142	0.972085	1.36336	1.45193	0.94381	1.02668	0.991696	0.818561	0.973354	1.24101	0.859483	1.26246	0.964151	0.756662	0.806716	1.16102	1.62651	0.867551	1.26189	0.756219	0.716903	1.03535	1.18764	0.91996	1.64552
138	chr1	77452831	78025527	1.16518	1.1629	1.29617	1.38901	0.906732	1.44202	0.64381	1.09028	0.940593	1.01046	0.944979	0.967089	1.13099	1.07189	1.02931	1.2406	0.725606	1.2804	1.59259	1.05129	0.741688	0.923488	1.07656	0.77266	1.2052	1.54667	1.13035	1.34318	0.891158	1.00081	1.23615	1.11136	1.64419	1.26737	1.06068	0.934316	1.07395	0.998983	0.817188	1.09229	0.962465	0.697561	1.18191	1.2495	0.834743	1.40691
139	chr1	78025528	78618126	0.848671	1.05005	1.14788	1.05147	0.87666	1.03222	1.07403	1.04858	0.943907	0.782691	1.19998	1.16912	1.09445	1.33431	0.97929	0.756563	0.902558	0.906868	1.27011	0.801985	1.42309	0.780972	0.817972	0.904536	1.07211	1.13414	1.15148	0.833921	0.712555	0.852985	1.00923	0.83381	0.96984	0.940833	0.973315	0.738928	1.01674	1.14835	0.913029	1.31063	1.40626	1.29685	1.08681	1.05617	1.56638	0.708438
140	chr1	78618127	79187317	1.03602	1.1632	1.16732	1.20141	1.0018	1.29198	0.571216	1.0205	0.756723	1.12688	1.1429	1.11136	1.24573	1.08764	1.15623	0.635761	0.795908	0.753169	1.30349	1.30107	0.90395	0.900427	1.02405	0.974998	1.13494	1.26292	0.894799	1.11941	0.76812	1.01781	1.06964	1.17663	1.03996	1.36382	1.07823	0.967274	0.657076	1.49591	0.987999	1.04211	1.08626	0.799019	0.734309	0.812884	1.09303	0.901115
141	chr1	79187318	79785984	1.15479	0.941561	0.941368	0.91828	1.23987	0.843761	0.848944	1.04216	1.00978	1.01236	1.03581	1.40493	1.02873	1.15596	1.23353	0.593128	1.07483	1.02938	1.05811	0.982656	0.738393	0.933948	0.968907	0.984101	0.844872	1.04542	0.857572	1.49134	1.26274	1.45281	1.0539	1.01791	1.22575	0.912989	1.54	0.693849	0.977124	1.28898	0.70157	0.585508	0.823409	0.990484	0.776958	1.40793	0.673403	0.598385
142	chr1	79785985	80402697	0.854461	1.03846	1.27374	0.676535	1.32741	1.05588	0.766108	1.00983	0.927798	1.08266	1.19942	1.08118	0.84969	0.958742	0.843822	0.531226	0.832071	0.692892	0.905767	1.08365	0.848276	0.859277	1.00632	0.909003	0.689938	1.06493	1.03732	1.14239	0.972559	0.920772	1.1875	0.827254	1.14091	1.14686	0.844055	0.680871	0.979384	0.998321	1.00088	0.690349	1.11657	1.11781	1.06578	1.19033	1.13759	1.46951
143	chr1	80402698	81035618	0.957021	1.19472	1.25789	0.864662	1.11011	0.98765	0.575109	0.955226	0.937341	1.38309	1.07103	0.809695	0.951923	1.02123	0.98498	1.23453	1.34454	0.737065	1.14841	0.95127	1.00909	0.879332	0.907591	1.19913	0.853077	0.879699	0.824107	1.16909	0.89821	0.912529	1.02939	1.14921	1.00676	1.15988	0.877214	0.832844	0.662228	0.989975	0.993666	1.18646	0.826633	0.914554	1.08492	1.12085	1.06648	0.74891
144	chr1	81035619	81634233	1.14239	0.980225	0.849709	1.28534	0.859433	0.938779	1.05297	0.723246	1.06875	0.93072	0.670408	1.11199	1.28119	1.23361	0.936644	0.764566	0.908817	0.851945	1.04801	0.936904	0.793647	0.820555	0.950366	0.912833	0.903333	1.06766	0.82576	1.23279	1.2573	1.01243	0.822949	0.641923	1.08273	0.830298	0.979107	0.98082	1.08882	1.16756	1.38401	0.989196	0.811581	0.852598	1.2568	0.878582	1.13731	0.755743
145	chr1	81634234	82189465	0.995726	1.08142	1.55623	0.866519	1.04904	1.35881	0.664239	1.03801	1.09901	1.38739	0.949384	1.16043	0.923468	0.818166	0.863672	1.23552	0.792689	0.694597	1.21189	1.01355	1.20805	0.977933	0.901079	0.975851	0.854675	0.944305	0.917706	0.965937	1.17812	0.718979	0.705746	0.866654	0.785669	0.693226	0.976762	0.825233	1.20095	0.927701	1.00436	0.755076	1.10691	1.00031	1.25506	1.05964	0.974097	1.28371
146	chr1	82189466	82759702	1.15327	0.886919	1.23144	1.01756	1.21278	1.08373	0.911548	1.05912	0.81316	1.01353	1.16327	1.13124	0.950628	1.02311	0.8434	1.61875	0.706765	0.636604	1.04006	0.835498	1.15836	0.901399	1.20472	0.92687	0.97294	1.09844	0.798563	1.13984	1.10452	1.03676	0.889133	0.856532	0.527049	0.76774	0.943929	0.672102	0.909218	0.904664	0.710813	0.980586	0.777056	0.952062	1.24684	0.813809	1.07863	0.666297
147	chr1	82759703	83348091	1.11333	0.768332	1.64765	1.16142	1.34929	0.668669	0.769829	0.908382	1.10806	0.746359	1.22228	0.759462	0.91907	0.78726	1.12352	0.796601	1.01514	0.728219	1.04852	0.925386	1.03284	0.880305	1.01135	0.829197	1.16843	0.820203	0.905404	0.76783	0.750728	1.09551	1.04168	1.1479	1.02794	0.876185	1.18282	1.14331	0.86846	1.09645	0.753158	1.32681	0.793977	1.15453	1.18927	0.995933	1.02706	0.662005
148	chr1	83348092	83931134	0.954796	0.992927	1.16884	0.889746	1.5949	0.593025	0.784111	0.975304	1.09945	0.753666	0.886134	0.967131	1.10119	1.12689	0.849837	1.01902	1.11984	0.693134	1.10648	1.20684	0.893589	1.10878	1.14512	1.09025	0.937907	0.855361	0.734058	1.07867	0.948729	1.03027	0.903484	0.767703	0.71643	1.56992	0.85009	0.810538	1.03708	1.10751	1.08785	0.93568	0.857226	0.896605	0.938942	0.917826	1.25779	1.09083
149	chr1	83931135	84492952	1.19026	0.974494	1.06552	1.16152	0.828241	0.981737	0.769266	0.930651	1.03116	1.3183	0.738847	1.03646	0.967452	0.83805	0.997835	1.03075	0.596892	0.795116	1.07432	1.34111	1.00522	1.03433	1.28462	0.736025	0.865771	0.956905	0.754296	1.25079	1.12107	0.718705	1.02222	1.01548	0.953819	0.800107	0.883356	1.52747	0.924487	1.3415	1.00177	0.92474	0.74197	1.03931	1.25726	0.834446	0.733506	1.09673
150	chr1	84492953	85068893	1.21417	1.09604	1.15551	0.954326	0.802936	0.796808	0.816414	1.05034	0.958511	1.14187	1.21521	1.03301	0.913244	1.10645	1.02764	0.866938	0.711457	1.01192	1.07869	0.953686	1.00558	0.936604	1.14803	0.898749	0.815467	0.993673	0.735873	1.18918	0.83016	1.55294	1.09407	1.28129	0.974687	0.949655	0.954724	0.913089	0.994507	1.39305	0.9602	1.25705	0.846545	0.914456	0.821788	1.13089	0.895894	0.890146
151	chr1	85068894	85575571	1.20805	1.14673	0.982116	0.723163	1.1325	0.92069	0.816659	0.799402	1.0036	1.03712	1.2689	1.12255	1.04965	1.03733	1.34944	1.09275	0.852708	0.82345	0.987002	0.94375	0.866803	0.995018	1.13723	0.684412	1.09842	1.04382	1.01628	0.742865	1.00154	1.15943	0.886183	1.12876	1.16708	1.2499	1.28741	1.14072	1.00072	0.915159	0.919292	1.50983	1.26953	1.38305	0.911659	0.934888	1.0263	0.990972
152	chr1	85575572	86113236	0.891858	0.995646	1.01939	0.801797	1.53266	1.04161	1.06077	0.947084	1.05999	0.950562	1.30019	0.954292	1.03643	1.02611	1.04665	0.917432	0.770904	0.748046	1.0626	1.12979	0.684404	1.00839	1.14126	0.810429	0.96153	1.28934	0.903611	0.991668	0.768294	0.676349	1.13758	1.12676	0.912781	0.644641	1.1201	1.69411	1.23264	0.897186	0.645518	1.0231	1.16431	0.749998	0.789122	0.85878	1.05216	1.33053
153	chr1	86113237	86756515	0.918932	1.23721	0.78578	0.647664	0.821257	0.858499	0.984427	0.875547	1.02866	1.18711	1.41672	0.801113	0.904918	0.922978	1.02251	0.690359	1.39601	0.976857	1.10316	0.980806	1.2438	0.985391	0.906372	1.12978	1.22036	1.03839	0.908395	1.14884	1.12396	0.924357	1.1966	0.740359	1.36425	0.821062	1.28795	1.16013	0.979453	1.28172	0.842368	1.00094	0.793737	0.888626	1.04037	1.21837	0.983819	1.17738
154	chr1	86756516	87329744	0.952014	0.818982	0.833908	0.857815	0.706784	1.32718	0.819652	0.927029	1.06763	1.02577	0.685034	0.813024	1.05244	1.04921	0.885981	0.665216	0.944755	0.726773	1.06026	1.26449	0.990604	0.861668	0.837582	1.15794	0.930975	0.983524	0.795563	1.13161	0.853291	1.12229	1.40461	1.0294	0.925926	1.00515	0.611398	1.15417	0.952712	1.03919	0.682099	0.544016	0.763105	0.917705	0.928021	0.652081	0.639844	0.704359
155	chr1	87329745	87863669	1.15957	0.995577	0.833988	1.06907	0.617469	1.19763	0.834094	1.00955	0.982563	0.960863	1.12143	0.865199	0.79539	0.92362	1.01396	0.729042	1.02156	1.04314	1.11748	1.1032	1.31779	1.09481	0.717061	1.26342	0.922301	1.20589	0.952908	1.13919	0.913692	1.15617	1.07568	0.761513	0.953012	1.10444	1.11038	1.114	1.00563	0.717551	0.932156	1.05432	0.937995	0.739892	1.1427	1.10965	1.13371	1.17868
156	chr1	87863670	88403598	1.16645	1.08252	0.757553	0.876657	0.947381	0.928497	0.916657	0.971008	0.993205	0.934797	1.37936	1.00143	0.872769	0.719609	0.87684	0.983823	0.796076	1.03755	0.774906	1.15513	0.63803	1.01472	0.901723	0.975288	0.963673	1.14549	0.999201	1.10459	1.22721	0.560532	0.898903	1.12727	1.06052	0.620453	0.616064	1.01394	0.721731	1.17713	1.06672	1.18512	0.553995	1.15874	1.10965	0.88228	0.730771	1.36373
157	chr1	88403599	88997463	0.847033	0.750604	1.34169	0.880631	1.12396	0.513845	0.658753	0.833444	1.03443	1.01677	1.53236	0.915644	1.29886	0.955804	1.06145	0.731682	1.34652	0.641136	0.762764	0.708209	0.93319	0.745736	0.9146	1.26884	1.05869	1.05726	0.694111	0.963249	0.68277	0.958592	1.06147	0.891771	0.832745	0.736255	1.10749	0.780368	0.80916	1.30496	0.63503	1.25578	1.18676	0.783029	1.03269	1.08158	1.08249	0.73863
158	chr1	88997464	89587170	1.20273	0.786215	0.827017	1.06352	0.61097	1.12076	0.793565	0.720423	1.06492	1.1016	1.04464	1.0122	1.06621	1.18169	1.00899	0.967129	1.13396	1.1724	1.07636	0.971909	0.805757	0.962775	1.0129	1.05267	0.838394	1.20832	0.786466	1.08691	1.12293	0.754594	1.01972	1.19865	1.12691	1.65013	1.03709	1.27737	0.663522	1.10345	1.32129	0.969208	0.974885	0.805822	1.12511	1.10363	1.12712	1.04706
159	chr1	89587171	90175994	1.0233	0.970118	0.638714	0.927105	0.941781	0.918605	0.844704	0.896796	1.05711	1.15908	1.38168	1.06155	1.23654	0.757296	0.974021	0.809712	1.09977	0.934505	1.01047	1.33628	0.868464	1.03546	0.915627	0.891141	0.980304	0.967326	0.98504	0.830245	0.944563	1.21002	0.994419	0.935305	0.855239	0.961897	0.661529	0.725311	0.990291	1.02371	0.888581	0.617327	0.937866	0.992807	1.00902	1.19703	1.0951	1.17705
160	chr1	90175995	90739605	0.987483	1.38699	0.935137	1.07666	1.11091	1.28054	0.641344	0.76835	1.0169	1.20182	0.70753	1.29558	0.871047	0.910523	1.11874	1.31949	1.20403	0.938603	1.18087	0.936459	1.3421	1.1533	1.18268	1.1276	1.20715	0.804731	1.00995	0.946144	0.554522	1.41498	1.02627	0.975513	1.01193	1.09873	0.758281	1.15313	0.957126	1.67999	0.914505	0.922165	0.722148	0.697408	0.837398	0.848223	0.947549	0.806144
161	chr1	90739606	91304174	1.08997	1.41558	1.19239	0.674019	1.1915	1.13105	0.875989	1.0414	1.02436	0.862304	1.70861	1.06173	1.02671	1.22462	0.807663	0.693398	0.971133	1.10243	1.02095	1.22863	0.897827	0.871512	0.972959	1.03001	0.957353	1.23418	0.815859	1.32568	0.795329	1.08103	1.08065	1.29577	1.29908	0.602871	0.711363	0.93462	0.988377	1.02103	1.00374	1.01979	1.24503	0.850937	1.01457	0.932368	0.949394	1.04548
162	chr1	91304175	91928904	1.14008	1.13735	0.960919	0.962427	1.39974	1.08328	0.6612	0.981866	0.870045	1.32444	0.989223	1.04182	0.922689	0.955371	0.822182	1.03806	1.42617	0.758612	1.33494	0.822837	0.618124	0.847968	1.01593	0.789183	1.14529	1.04576	1.02653	0.938781	0.949005	1.70313	0.795592	1.21747	1.18598	1.29391	0.938523	0.825498	0.978514	1.58671	1.06891	0.799199	1.0313	0.939219	1.25716	1.25351	1.0784	1.0755
163	chr1	91928905	92489562	0.870114	0.844223	1.44236	0.732951	1.1769	1.59427	0.693626	0.85094	1.05893	0.841769	1.36578	0.909541	1.1198	0.724543	1.22327	1.20599	0.972298	1.15858	1.08487	1.02288	1.02237	1.14829	0.917682	1.21671	0.888737	1.29248	0.955738	1.13218	1.27336	1.06343	0.688545	1.39741	1.00121	0.6704	0.852289	0.974978	1.27393	1.44408	0.626407	0.79659	0.96354	0.872133	0.924508	0.985155	1.02113	0.960811
164	chr1	92489563	93096618	0.732221	1.15	1.07349	0.698735	1.46296	1.07053	0.862939	1.05122	0.943286	1.40521	1.12647	1.2766	1.1308	0.838905	0.842016	1.18187	0.992698	1.10674	1.01633	0.85118	0.802886	1.02342	1.30324	1.76623	0.941027	1.16921	0.831873	1.26669	0.682046	0.988334	0.862641	0.802728	1.03445	1.53027	0.770711	1.17179	0.838544	1.03956	0.945553	1.13663	0.650196	1.04021	1.09604	1.02075	0.820133	1.33549
165	chr1	93096619	93717745	1.16642	0.840998	1.1892	0.797786	0.938437	1.16173	0.730915	0.99219	0.915091	1.36844	0.856278	1.19923	1.14701	0.77438	0.81258	1.03571	0.877606	0.753967	1.06577	0.778908	0.839989	1.10069	1.19516	1.09913	0.705021	0.862782	0.880222	0.966113	0.591458	1.03093	1.3565	0.990312	0.871461	0.705407	1.21426	0.847652	0.976387	1.12135	0.901174	0.9814	0.871861	1.19439	1.08006	1.07808	0.899544	1.07788
166	chr1	93717746	94263259	1.08788	1.05075	0.513254	1.24773	1.35477	0.867805	0.728506	0.987911	0.970005	1.15669	1.10092	0.838468	0.912057	0.922585	0.937053	1.39696	0.895077	0.752049	0.810793	1.07366	0.990653	0.935703	0.955457	1.32319	0.997293	1.15648	0.929688	0.836497	1.21526	1.03116	1.10996	1.02938	1.15175	1.19124	1.25341	1.39963	0.925436	0.919148	0.950299	0.783452	1.01757	0.976269	0.822024	1.37668	0.673458	0.795162
167	chr1	94263260	94793621	1.09347	1.38656	0.853194	1.35418	0.81356	1.26767	0.857349	0.837635	0.988029	0.817867	1.19164	1.26458	1.11609	1.07488	1.15283	1.4302	1.23141	0.599214	0.971925	0.975067	0.99975	1.02767	0.831007	0.959139	1.3788	0.842422	0.964548	1.07023	1.13995	1.20926	1.08716	0.900306	1.08971	1.13757	1.21304	1.37071	1.11819	1.34973	1.03416	0.760676	0.744182	0.948838	0.685406	1.06095	1.20527	1.13046
168	chr1	94793622	95321451	0.828363	1.0774	0.943231	1.02249	1.24253	1.01413	0.65196	0.861863	0.89076	0.90589	0.675422	0.853674	0.96109	0.729037	1.28254	1.38487	1.12497	0.739721	0.952189	1.05064	1.08425	0.946674	0.994044	1.10258	1.16377	0.87811	1.12542	1.28922	0.769757	1.3977	1.00898	1.19994	0.763651	0.881265	1.09745	0.766703	1.04426	0.674636	1.02855	1.03019	1.55391	1.08522	0.880836	1.06769	1.54101	1.37462
169	chr1	95321452	95886048	0.997524	0.905951	1.16947	0.910265	0.777255	0.995769	0.746218	1.06674	1.02718	1.04146	1.42967	1.02113	1.137	1.0386	1.23405	0.765418	0.549896	0.503042	1.0512	1.06466	0.909165	0.906046	1.04048	1.20601	1.06247	0.566787	0.844061	1.28869	0.836741	0.927198	1.26078	0.741752	1.06861	0.942148	1.27537	1.40172	0.954657	0.937728	0.785792	0.841651	1.05013	1.19329	1.38269	1.06906	0.863819	1.69339
170	chr1	95886049	96451312	0.96667	1.08423	0.975868	0.85794	0.759017	1.06728	0.932165	0.983297	1.04024	1.07216	1.0058	1.13736	1.05999	0.886415	0.805135	0.698204	0.864865	0.780033	1.05961	0.879052	0.984691	0.944264	0.892785	1.113	0.974243	0.965252	0.995877	0.971722	0.75198	1.01697	0.919531	0.687776	0.995262	1.12183	0.973694	0.99143	1.00089	0.874617	0.875017	1.03347	1.00598	1.07556	0.788154	1.00885	0.987621	1.10432
171	chr1	96451313	97009109	1.01965	1.18547	1.15578	0.842722	0.671914	1.09394	0.812519	0.870848	1.00542	1.024	1.2142	1.05877	0.87078	0.952345	1.14542	0.71481	0.902837	0.917898	0.562495	1.02949	0.859234	0.964248	1.08147	0.90182	1.18985	0.959318	0.921633	1.2205	1.147	0.945112	0.865825	0.789741	0.876467	0.922621	0.839308	0.802996	0.59004	1.03898	0.863748	0.750705	0.674765	0.876567	1.28868	1.203	1.25659	1.31984
172	chr1	97009110	97593588	0.826477	1.31728	1.28774	0.887142	0.957745	1.2062	0.961266	0.940834	0.970174	0.985076	0.885793	1.08542	0.978627	1.16059	0.648759	0.874294	0.710968	0.91893	0.961842	0.95509	0.774642	1.05881	0.891849	1.39139	1.08483	0.993101	0.972494	0.613601	1.00216	0.770977	1.25707	1.03991	0.878061	0.970884	0.791716	1.32979	1.00753	1.16654	1.15225	0.769733	0.922932	0.943794	1.12377	1.05156	0.860695	1.01615
173	chr1	97593589	98180882	0.760349	0.959374	1.34479	1.26844	1.29158	1.01216	0.973907	0.966008	1.10909	1.19244	0.822803	0.863682	0.74287	0.904102	0.89691	1.25174	0.989973	0.941339	1.00751	1.19001	0.945832	1.01786	0.926171	1.18367	0.983633	1.12564	0.932828	0.965723	0.983402	0.936421	1.37251	0.797457	0.831646	1.28407	1.1931	0.983882	1.13145	1.30641	1.08237	1.17179	0.746068	1.10978	1.15137	1.18763	0.892415	1.07902
174	chr1	98180883	98757962	0.795242	1.12762	0.816155	1.14753	0.974983	0.821916	0.76464	1.07303	0.979415	1.25784	0.994328	1.02577	1.00343	0.857929	0.997788	0.820616	1.34982	0.952816	0.773691	0.981295	1.0613	0.792549	0.900155	0.903903	1.0643	1.05674	0.864985	1.17178	0.819002	0.501316	0.941186	0.888254	0.788288	0.997504	1.0097	0.922168	1.25257	0.959086	0.957507	0.984027	0.870294	0.918552	0.911786	0.984004	0.791765	1.29106
175	chr1	98757963	99357509	0.862087	0.846983	0.94819	1.09406	1.08728	1.06859	0.840681	1.19057	0.86212	0.848814	0.809197	0.941758	1.32493	0.868844	1.02293	0.843186	0.94594	1.00909	1.27164	1.1571	1.28646	1.03496	1.03016	1.06604	0.862251	0.976603	1.08376	0.915749	1.19034	1.12853	1.22156	1.28581	0.676893	0.92604	0.907862	0.89818	1.14157	0.755028	0.978729	0.902554	1.00007	1.03529	0.935377	0.541273	1.25451	1.18932
176	chr1	99357510	99963471	1.07616	0.787004	1.09521	0.837474	0.871269	0.644504	0.651847	0.88869	1.0548	0.990486	0.617028	1.03926	0.728151	0.898831	0.922891	0.604013	0.759785	1.21901	1.10581	0.605502	0.782642	0.975513	0.858364	1.04552	0.974134	1.09331	1.11868	1.09384	0.722332	0.838861	1.0489	0.969819	0.825889	1.07795	0.905433	0.564658	1.04515	0.935491	0.961559	1.24342	0.669831	1.1425	0.555169	0.920285	0.610929	1.4065
177	chr1	99963472	100556373	0.805698	1.15729	0.969157	0.958423	0.718392	0.779937	0.861133	0.961725	0.94005	0.74919	1.06968	0.948294	0.946644	1.11721	0.890406	1.09583	1.05821	1.31383	0.818451	0.81137	0.656504	0.819877	0.91355	1.20049	1.0599	0.81423	0.811203	1.25769	0.951429	1.13737	1.24857	0.920834	0.972347	1.1685	0.727024	0.842551	1.07201	0.992862	1.13818	0.90611	0.582715	0.88136	1.00456	0.904365	0.795607	0.825084
178	chr1	100556374	101126693	0.962893	1.18856	0.897135	0.963139	1.26842	0.759499	0.928326	1.02381	0.908904	0.921936	1.05971	0.969397	1.01788	1.02082	0.96477	0.936982	0.918405	0.951047	1.18578	1.14954	0.888097	0.777823	0.946401	0.98035	0.906996	1.31547	1.10466	0.967625	1.07405	1.38672	1.03372	0.925438	1.10426	0.929652	0.558991	1.09594	0.898316	1.29507	1.12208	0.87002	1.18196	0.899878	0.960073	0.95213	1.37024	1.07264
179	chr1	101126694	101706024	1.28883	1.00459	1.24105	1.12816	1.01866	1.01358	0.849901	0.99706	1.04706	0.708401	1.16338	1.16332	1.0622	1.00696	1.08053	0.471299	0.791998	0.855841	1.29831	1.13029	0.858342	0.859962	1.27132	1.1069	0.736253	1.18033	0.930641	1.15137	0.90098	0.861079	0.904613	1.1249	0.942725	0.760487	0.694341	1.03208	0.901648	1.27312	0.840801	0.879143	1.12275	1.32783	1.16552	0.784026	1.45542	1.05883
180	chr1	101706025	102292187	0.652528	1.06614	0.479878	1.04519	1.03993	0.806297	0.866511	1.06168	0.904786	0.461927	1.12563	0.861397	1.20091	1.12788	0.9278	0.714456	1.09047	0.931687	1.00808	1.02223	0.994946	0.811598	1.20629	0.960847	0.933772	0.803921	1.00076	1.22523	0.929586	1.27292	1.01767	1.09967	0.972676	0.77043	0.851213	0.902926	0.765118	1.18658	0.878316	0.970948	0.837796	1.26716	1.17771	1.20498	0.924871	0.955487
181	chr1	102292188	102947726	0.844901	1.00678	1.11037	1.1873	1.02403	0.791823	1.02429	1.06163	0.991498	1.12349	1.05251	1.46193	1.05476	0.713013	0.806579	1.20551	0.82727	0.99943	0.89071	0.93444	0.5194	0.924712	0.781515	0.945773	0.899187	1.00812	0.807645	0.943006	0.732724	0.735905	0.99542	1.24503	0.874354	1.02472	0.994421	0.812139	1.0467	1.4405	1.14096	1.018	0.660309	1.35506	1.33969	0.936332	1.29542	1.08999
182	chr1	102947727	103611327	0.804533	1.15507	1.04275	1.01261	0.957447	1.12479	0.817665	0.968969	0.904231	1.35394	1.38671	1.12113	1.4054	0.994797	1.20036	1.12208	0.994354	1.15738	1.01794	1.4856	0.936153	1.03544	1.35501	0.801776	1.05061	1.02336	1.00663	1.00549	0.950627	1.34218	0.829012	1.12785	1.21841	0.868816	0.905875	0.68716	0.902501	1.00759	1.14053	1.4796	0.907158	1.31245	0.987781	1.03229	1.43224	1.06471
183	chr1	103611328	104325394	0.861427	1.2528	1.28675	0.929336	0.80519	0.865724	0.768809	1.05989	0.974787	0.881213	0.835284	0.948207	0.916121	1.05446	1.13284	0.792041	0.888998	0.763705	1.25683	1.19156	0.810492	0.945316	0.953514	1.27118	0.934181	1.03825	1.05843	1.07409	1.07423	0.847922	1.02329	1.0834	1.1125	0.539702	1.21883	1.25667	1.01414	1.28355	0.830666	0.800613	0.750012	1.33303	1.12524	1.20227	1.42919	1.18276
184	chr1	104325395	104973153	0.870889	1.10191	1.12279	1.1788	1.19695	1.16221	0.946366	0.642432	1.01119	0.991085	0.999623	1.09851	0.853009	1.18562	0.978593	0.578172	1.04709	0.796998	0.89952	1.15205	1.2271	1.07082	0.925666	1.13247	0.815406	0.776445	0.831163	0.829036	1.02584	0.761832	1.09048	1.02606	1.12851	0.964468	0.931591	1.10758	0.855386	1.04685	0.901964	0.816773	0.937542	1.05603	1.2895	0.841709	1.10669	0.799995
185	chr1	104973154	105631925	1.55231	1.12233	2.07744	1.1495	1.68008	1.06996	1.07628	1.3161	1.25824	1.22334	1.26564	1.4308	1.26066	1.12528	1.39989	1.60007	0.885429	0.855212	1.12784	1.21045	0.91466	1.12803	1.36603	0.89487	1.38938	0.947123	1.18975	1.07392	0.923414	0.75319	0.939032	1.17494	0.897468	1.05719	1.06242	1.14075	1.06382	1.81577	1.16984	1.20708	0.834712	1.23255	1.30056	1.13205	1.46215	1.23673
186	chr1	105631926	106303824	0.911705	1.24197	0.984109	0.968345	1.06983	1.39479	0.723256	0.955496	1.03951	0.92202	1.06905	1.20625	0.781737	0.770119	0.706645	1.03725	0.884492	0.945764	0.93677	1.09356	0.870012	0.897471	0.818474	1.04769	1.18992	1.17206	1.04357	0.803561	0.787221	0.993109	0.81827	1.03136	0.835698	0.884712	1.18902	0.654948	1.01335	1.06747	1.44451	1.25775	1.5319	1.28283	0.902306	0.896353	0.963173	0.968627
187	chr1	106303825	106953753	1.21463	1.01016	0.903843	0.817199	0.774209	1.12095	0.73554	0.8675	0.976297	0.785807	1.3182	1.29512	0.81991	1.26373	1.11703	0.929214	1.10852	1.17162	0.940348	0.90501	0.973397	0.887289	0.892563	1.44272	1.07431	1.15362	1.02883	0.928681	0.761996	1.15805	0.956294	0.740526	1.0886	0.765892	0.630053	1.19038	0.998225	1.23089	1.06782	0.692233	0.615971	1.1946	0.956994	1.15275	0.495574	0.839674
188	chr1	106953754	107568215	1.18359	1.013	1.05814	0.758821	1.29687	1.3649	0.866653	1.19259	1.07204	1.20829	0.91536	1.1558	1.0571	0.967637	0.891156	1.2496	0.983023	0.913219	0.94558	0.846374	0.75673	0.98573	0.987268	1.38521	0.866003	0.940149	0.924599	1.18627	0.759961	0.8338	1.05573	1.07221	1.10255	0.917251	0.91089	0.952686	1.12381	1.32891	0.663899	1.26413	0.661372	0.998183	1.46367	0.717879	0.944726	1.14387
189	chr1	107568216	108137596	0.893278	0.989993	1.28453	0.926187	1.16903	1.11925	0.823912	1.06951	1.04265	1.20515	1.2444	1.39912	1.16566	1.0502	1.193	0.710834	0.993557	1.0109	1.07594	1.08007	0.808393	0.959081	0.891143	1.1243	0.87518	1.01816	0.951677	0.685647	0.813629	1.13621	0.981733	1.08979	1.18515	1.34704	0.625921	1.18266	1.08172	1.34626	1.25904	0.997786	1.00115	1.2196	0.727076	1.00583	1.11676	0.917496
190	chr1	108137597	108737609	0.908935	1.00383	1.23365	1.08122	0.923791	1.24776	0.688915	1.20688	1.12171	1.32091	0.842193	0.948301	1.01192	1.23232	1.4841	1.09563	0.669462	1.22495	1.21342	0.851943	0.860382	1.0071	0.901841	1.09633	1.01913	0.838176	0.802299	1.0408	0.713539	1.19284	1.16554	0.920882	0.908969	0.884302	1.26583	1.08653	1.01055	1.18029	0.714159	0.830723	1.34029	1.26911	1.00474	1.11069	1.25481	0.982355
191	chr1	108737610	109217011	0.920382	0.827655	1.037	1.15634	0.944811	1.19099	1.01675	0.95544	1.06665	0.973704	0.979073	1.53798	1.00386	1.09239	1.27005	0.717175	0.818461	0.841047	1.13186	0.776828	0.84629	1.10781	1.25552	1.16275	0.512612	0.840985	0.802665	1.01062	0.99523	0.915672	1.10467	0.966511	0.697432	1.2378	1.12264	1.42773	0.81205	1.81382	0.654633	1.05593	0.968272	1.43468	1.03489	1.04264	1.06351	0.771477
192	chr1	109217012	109792864	0.75078	0.726947	1.13528	0.905535	0.903062	1.17173	0.78388	0.981262	1.06662	1.37805	0.876346	0.939964	1.06159	1.11841	0.753667	0.945093	1.01739	1.01932	1.2236	0.939834	0.915772	1.00695	0.922677	1.11137	1.11486	1.20503	0.898782	0.833799	0.937045	1.07326	1.0217	1.1103	1.37852	0.759553	0.913759	1.26785	1.02986	1.72345	1.15204	0.881069	1.2032	1.13408	1.01394	1.18083	0.954266	0.864098
193	chr1	109792865	110307274	0.997684	1.08113	1.17688	0.876957	1.09387	1.01247	0.975048	0.858238	1.05157	0.761936	0.93165	1.01102	1.11247	0.800224	1.04831	1.34451	1.08405	1.19127	1.14897	1.55015	0.897834	0.947195	1.02097	1.54963	0.767439	1.09843	0.812228	0.756112	0.995294	1.63227	0.947608	1.22792	0.904657	1.23762	0.575161	0.793416	0.930577	1.44783	1.07332	1.02199	0.726367	1.183	0.958813	0.697531	1.16458	1.13792
194	chr1	110307275	110817585	1.14443	0.96346	0.964552	1.07704	1.22722	1.20921	0.781154	0.969409	0.823048	1.1678	1.18277	0.861066	0.948658	0.902249	1.20756	1.15224	0.928485	0.942585	0.945089	1.22276	0.940228	0.856751	0.876643	0.871219	0.993255	0.775028	1.02757	0.871209	0.731204	0.99624	0.862835	0.679373	0.875443	1.14987	1.03994	1.0496	1.29238	1.22613	1.10901	1.0944	0.697543	0.988687	1.05067	1.37932	1.33795	1.20573
195	chr1	110817586	111353974	0.817996	1.11379	0.660011	0.952849	0.91096	1.0151	1.32383	1.14164	1.04412	1.09491	1.07431	0.87086	1.04773	0.873036	0.754244	1.21442	0.959007	0.783047	0.983759	1.02312	0.75414	0.770731	0.669015	0.806749	0.832694	0.893917	0.877605	0.860133	0.764532	0.904227	1.04249	1.05937	1.07001	0.676764	0.98395	1.2058	0.969562	1.32029	0.732642	0.968598	0.983913	0.668873	0.798437	1.25831	1.0425	0.876678
196	chr1	111353975	111935225	0.773109	0.889718	1.27017	0.848399	0.796829	0.930805	0.83097	1.00314	1.04294	1.05928	1.11224	0.885673	0.990333	1.05937	0.871237	1.06008	0.728205	0.714535	0.856634	0.775636	0.975858	1.0633	0.96003	1.13081	0.887146	1.04551	1.056	0.87398	1.39007	1.3954	1.23331	0.939046	1.03718	0.935408	0.805336	0.829892	1.20521	1.22517	1.20364	0.686855	0.519526	0.889144	0.749072	0.911681	0.855379	0.914866
197	chr1	111935226	112464826	1.27483	0.958282	1.22424	0.777338	1.11657	1.10592	0.845795	0.942269	0.995572	1.34351	0.967787	0.898652	0.851214	1.13102	0.834282	0.980461	0.769465	0.669558	1.33097	1.11827	0.485663	0.983418	0.953326	1.12647	1.03515	0.914218	0.911056	0.931685	0.82671	0.619973	0.905811	0.775581	0.768045	0.861171	0.623939	1.27565	1.16954	1.3221	0.90485	0.960083	1.04552	0.944729	1.3204	1.15263	0.888796	1.16353
198	chr1	112464827	113023071	0.994644	0.785148	1.04695	1.27275	0.80216	0.887457	0.954195	0.970573	0.993092	0.801353	0.87891	0.934994	1.10057	1.00357	1.17766	1.38005	1.32287	0.927487	1.03963	1.08003	0.700552	1.07421	1.13715	0.866152	0.963194	0.979224	0.911981	0.971027	0.942504	0.814705	1.04647	1.03234	1.61042	0.79624	0.69622	0.889673	0.914504	1.026	1.07496	0.90591	0.877674	0.91433	1.2648	0.92962	0.681133	1.34839
199	chr1	113023072	113601014	0.932432	0.94426	1.10453	0.830822	1.21425	1.25056	1.12761	0.849384	0.947948	0.858348	1.58832	0.798559	0.759838	1.31325	1.14698	1.0448	1.26129	0.772795	1.15168	0.858614	1.04326	0.916465	0.985573	0.741085	0.944639	1.27594	0.805928	0.782202	1.21675	1.15387	0.630193	1.32436	1.13632	1.01455	0.619698	1.13977	1.05463	0.938098	0.849031	0.6642	0.683289	1.02714	0.961017	0.994456	0.747599	0.820981
200	chr1	113601015	114190159	0.97754	0.992121	0.744585	1.4232	1.26347	0.869544	1.09692	0.962369	1.01461	1.0096	1.09557	0.902788	0.776295	0.843171	0.833986	0.905585	1.02808	1.01571	1.01144	1.0447	1.10785	0.862269	0.853834	0.651154	0.923256	1.01867	0.970208	1.03398	0.638843	1.04572	1.12361	0.841177	0.943294	0.862536	0.976042	0.990305	1.01081	1.22519	1.05537	1.27373	0.817136	1.28033	1.0702	0.932709	0.993892	1.09669
201	chr1	114190160	114724161	1.09047	0.945155	1.10853	1.15736	1.01874	0.898431	0.774061	0.893508	0.942962	1.18282	1.14547	0.942934	0.96627	1.25428	0.847783	1.2195	0.950722	0.706588	1.16812	0.789025	0.807437	0.911142	0.966504	1.09257	0.924547	1.02515	1.03865	1.5818	1.09214	0.860628	0.769524	0.967302	0.873597	0.828397	1.19958	0.937917	0.80588	1.118	0.989028	1.20025	1.25521	0.830137	1.18567	1.20392	1.04924	1.03192
202	chr1	114724162	115294291	0.815601	1.11953	0.850668	0.957634	1.12993	1.17331	0.913419	1.10835	0.934819	1.11477	1.02446	1.03474	1.07898	1.0651	0.702653	1.04541	0.903422	1.08189	0.802964	0.846964	0.743572	1.0465	1.12241	1.15065	1.41966	0.985235	0.861811	0.901224	1.37089	1.22823	1.04276	0.832776	1.19686	0.936948	1.17892	1.01722	0.83542	1.52277	1.00962	1.3307	0.892049	0.83173	0.75404	1.02022	0.953356	1.01995
203	chr1	115294292	115857853	0.757432	0.920815	1.11144	0.835939	0.885423	1.04109	0.913154	0.980518	1.05146	1.00253	1.04222	0.855233	1.0816	0.952253	0.839228	0.809121	0.948068	1.02502	1.10924	1.09312	0.719269	0.873102	1.18416	1.00468	1.10938	1.34298	1.0337	0.840295	0.659214	1.46916	1.00681	0.812317	0.870429	1.06187	0.721982	1.20018	0.846775	1.27789	1.10172	0.937053	1.01536	1.17067	0.930429	0.680299	1.02416	0.702509
204	chr1	115857854	116367679	0.718796	1.16475	1.70643	0.818334	0.764378	0.963504	0.84038	0.970181	1.09439	0.923348	0.922844	1.05574	0.95781	0.991921	1.12003	1.20109	1.00102	1.41996	1.25186	0.971625	0.890783	1.09027	0.815597	0.868441	1.16666	1.18472	1.0347	1.0893	1.08157	0.895545	1.30967	1.07753	1.06863	1.33696	1.09597	1.70981	1.25975	1.29776	1.32038	1.04752	1.15841	1.12197	0.898616	0.829264	0.993191	0.684838
205	chr1	116367680	116941363	0.604859	0.780754	0.866384	0.776485	1.28737	1.15745	0.783576	0.816765	0.808468	0.708898	0.609901	1.11794	1.16216	1.04311	0.954685	0.802878	1.23088	1.15609	1.11444	0.846555	0.962127	1.02476	0.944519	0.644657	0.8379	0.860498	1.0194	1.41282	1.23273	0.599984	0.905365	1.41604	0.954246	1.48466	0.908273	1.15332	0.786996	1.56614	1.31046	0.71925	1.19868	0.921131	1.12929	1.12852	1.36212	0.875228
206	chr1	116941364	117470302	0.63395	0.755733	1.13145	0.749904	0.83725	1.17771	0.733427	0.953311	1.06709	0.991539	0.687675	1.18842	1.07826	1.13094	0.924294	0.985769	0.930134	0.923318	1.00266	0.710735	0.659373	0.984883	0.925207	1.185	0.931466	1.20111	0.859056	1.22139	0.972733	1.45062	0.959075	0.948461	1.3381	0.970247	1.0078	1.1657	1.25712	1.45522	1.13262	1.0554	0.910309	1.00164	1.24622	0.885025	0.958435	1.10752
207	chr1	117470303	118055014	0.800651	1.06025	1.01449	0.999771	1.08337	1.07507	0.851042	1.24869	1.03362	1.00519	1.1092	1.36709	0.98117	0.892766	1.07166	1.25634	0.739014	0.901437	1.42414	0.901238	1.141	0.920716	0.895732	1.06816	0.714631	0.957978	1.04344	1.10504	0.849718	0.60892	1.20775	0.990835	0.655451	1.06929	0.821187	1.00319	1.1635	1.12839	0.587224	0.770665	1.05445	1.14249	1.20452	1.09975	0.886456	0.935906
208	chr1	118055015	118598626	1.20928	1.05145	0.783403	0.806934	0.896597	0.816501	0.654395	1.11007	0.984604	0.698801	1.59533	1.07324	1.31785	1.21565	0.82861	0.772206	1.47473	0.638775	1.05587	1.10021	0.828847	0.936265	0.844639	1.32578	1.1067	1.09079	1.04539	0.953529	0.597311	1.27462	0.824375	1.01267	0.754514	1.00499	0.880069	0.910404	1.10159	0.92665	0.91897	1.06273	1.01093	0.899387	1.10534	1.0704	1.01013	1.39763
209	chr1	118598627	119157780	0.944653	1.06872	0.999742	1.10108	0.8251	1.09435	1.05042	1.00253	0.949238	0.547572	0.741475	1.39045	1.22139	0.975209	1.07797	0.999598	0.924252	0.816789	1.04686	0.999079	1.1151	0.844911	1.06892	0.907275	1.09971	0.987691	0.923343	1.23713	0.85093	0.977511	1.12772	1.03805	0.94025	0.96585	1.22102	0.886994	1.02284	1.2942	0.80986	1.0045	0.801805	0.89331	0.848373	0.922255	1.42476	0.79552
210	chr1	119157781	119746918	1.10238	0.820469	1.25815	0.863941	1.1203	0.865943	0.868194	1.07671	0.925047	0.897353	0.690788	0.961768	0.576019	1.06579	0.742217	0.966026	1.0238	0.992712	0.89035	0.78558	0.619682	0.919134	1.01817	0.865556	0.857634	1.09505	0.847659	0.667975	0.670607	1.46309	1.17256	0.848052	0.983579	0.891604	0.763545	0.935207	1.02202	1.39299	0.761335	1.02647	0.961534	1.2244	0.92848	1.06758	0.948032	0.90838
211	chr1	119746919	120301818	0.895616	0.935604	0.598664	0.962266	0.977122	1.03316	0.733185	0.927207	1.00355	0.72989	1.25545	1.30393	1.16293	1.10458	0.967568	1.54376	1.02222	0.860124	0.98645	1.09715	0.444606	0.951719	0.741004	0.987364	0.748	1.25501	0.868239	1.10254	0.895027	1.29533	1.15253	0.910891	0.871889	1.09141	0.479825	1.52424	0.897934	1.16349	0.695824	0.795276	1.39286	0.786241	0.958567	1.00065	0.812905	0.835989
212	chr1	120301819	120653872	0.942562	1.32447	1.10788	0.735458	0.906553	1.09356	0.905114	0.98601	0.981029	0.84157	0.923469	0.953669	1.17911	1.34958	0.942409	1.21913	1.2395	0.600318	1.09336	1.07377	0.744731	0.969873	1.17554	1.05753	1.33498	1.12172	0.776297	0.936448	0.736498	1.10527	0.803418	1.12114	0.853985	0.655763	0.927444	1.19101	0.750173	1.39861	0.921052	1.06286	0.965674	0.6463	1.19984	0.771004	1.3974	0.960764
213	chr1	120653873	121212059	0.932792	1.08651	0.82638	0.874049	1.07572	0.964292	0.678163	1.14837	1.05342	1.24913	1.01368	1.28599	1.26799	1.17706	1.04093	0.605451	1.1692	0.8582	1.44113	1.07806	0.916273	0.908472	0.821521	1.03558	1.3524	1.05105	0.76571	0.894966	0.980887	0.638312	0.739136	0.901027	0.898638	0.788396	0.879962	0.807534	1.04637	1.1695	0.86199	0.925453	0.518296	1.03175	0.910565	1.11007	0.80658	0.870356
214	chr1	121212060	121484735	0.939961	1.00617	0.948929	0.64993	1.08257	1.22112	0.796496	0.942083	0.789319	0.590392	0.858013	1.13889	0.899341	0.596972	0.667164	0.997534	0.841474	0.733516	1.35589	0.998922	0.986205	0.937056	0.804563	1.06675	0.743484	0.943696	0.723538	0.77989	0.673701	0.859376	0.778676	0.906103	0.6557	0.933788	0.944394	0.642896	0.684244	0.951659	0.834041	1.14424	0.851275	0.840562	0.92169	0.631413	0.882908	0.917323
215	chr1	121484736	121485262	0.871506	0.804983	0.885267	0.935903	1.11159	0.788555	0.786518	0.948911	0.917938	1.09339	1.25033	1.08813	0.864222	0.723602	1.28318	1.03078	1.11355	0.74727	0.935084	0.808568	0.764198	1.05845	1.2584	1.0253	0.834046	1.04807	0.858779	1.34003	1.21793	1.19745	1.05388	0.937398	0.92706	0.896534	0.944287	0.96456	1.01286	0.911553	1.00013	0.841772	1.13472	0.918788	1.10578	0.99209	0.917115	0.986421
216	chr1	121485263	142635281	1.56585	2.23057	1.66742	1.5599	1.89701	1.90559	1.41417	1.88535	2.00224	2.05696	1.39842	2.07218	1.83774	1.48339	2.09029	1.76211	1.65527	1.41629	1.97894	1.78162	1.50136	1.43672	1.69438	2.14306	1.72313	1.38183	1.47972	2.01551	1.60783	1.69581	1.63293	1.53197	1.80966	1.64559	1.24736	2.10742	1.38512	2.0962	1.53573	1.95862	1.41415	1.81877	2.28497	1.96332	1.46493	1.79524
217	chr1	142635282	142860790	1.10887	1.66845	1.22122	0.831807	1.1496	1.22566	0.889325	1.35301	1.12422	0.807297	1.5898	1.16937	0.928941	0.994943	1.15792	1.39701	1.39318	1.20661	1.18508	1.0025	1.13992	1.09706	1.19239	1.36246	0.774001	1.02545	1.15872	1.45337	1.26663	1.15067	1.06312	0.935599	0.880609	0.70699	1.49867	1.8154	1.10156	1.07713	0.977516	1.19819	1.05054	0.917554	1.32705	1.48616	1.51361	1.49761
218	chr1	142860791	143228925	1.03532	0.943513	0.968316	1.43673	0.914609	0.94347	1.19031	1.09647	1.10913	1.02745	0.910183	1.16637	1.29247	0.849391	1.16673	1.232	1.0232	1.6964	1.09289	1.28704	1.41353	1.08773	1.1774	1.31778	1.09924	0.9356	0.962799	1.45938	0.722496	1.0024	1.17213	1.19071	1.20733	1.44899	1.5284	1.40026	1.06153	0.97424	1.08187	1.20142	0.832454	1.26483	1.43392	1.14109	1.41773	1.02052
219	chr1	143228926	143651621	1.17922	1.01378	0.827514	1.15055	1.30803	0.850083	1.03981	0.982455	1.06934	1.11198	1.33352	0.859215	0.999011	1.2085	1.33773	0.859371	1.32669	1.42271	1.43524	0.785093	1.43543	1.00432	1.06943	1.30112	1.38441	1.07394	0.988429	0.907912	1.10416	1.02231	1.27772	1.05772	1.2523	1.05995	0.83521	1.34868	0.750277	1.61072	0.863627	1.27488	1.15394	1.10237	1.53031	0.974916	1.1285	1.6209
220	chr1	143651622	144073980	1.3634	1.0694	1.347	1.22196	0.815528	0.989909	1.2229	1.17385	1.05953	1.02909	1.1538	0.933882	1.20359	1.06732	1.09791	0.764621	1.38156	1.36143	0.950379	0.996741	1.35182	1.15393	1.35453	1.28622	1.23052	1.12925	1.25011	1.13801	1.32343	1.17595	1.01537	1.62659	1.38037	0.823641	1.27641	1.36654	1.05777	1.3691	0.962094	1.43853	1.47313	1.50639	1.46767	1.58308	1.16132	1.38493
221	chr1	144073981	144687377	1.1308	1.07817	1.17126	1.08697	0.871295	0.91716	1.07417	1.2862	1.20104	1.03122	1.20277	1.28647	1.01175	1.33439	1.24139	1.44576	1.10346	1.47851	0.933558	1.49025	1.61488	1.17256	1.16239	1.46551	1.17649	0.990974	1.23882	1.58787	0.980517	0.794193	1.1237	1.09563	1.26542	1.07927	1.67263	1.15673	0.97752	1.22893	1.3869	1.13863	1.39028	1.37701	0.956961	1.16713	1.39877	1.34571
222	chr1	144687378	145014503	0.965856	0.788393	0.502439	0.847788	0.871422	0.73377	0.64631	0.740458	0.817449	0.767649	1.25485	0.83269	0.887898	0.500558	0.754775	0.821912	0.71808	0.573361	0.756105	0.805988	0.949409	0.689969	0.826966	0.786263	0.821768	0.695956	0.662147	0.879845	1.14459	1.08096	0.505094	0.781827	0.843533	0.924317	0.760292	1.08103	0.722616	0.819406	0.822682	0.515443	1.13864	1.10174	0.797964	0.685837	0.818746	1.17735
223	chr1	145014504	145200569	1.00026	0.894968	0.504814	0.889932	0.652647	0.809994	0.848637	0.988368	0.913346	1.10259	1.02625	1.3343	0.761432	1.04811	0.756231	0.700365	0.904427	0.593343	1.04866	0.833895	1.01572	0.899943	0.757915	0.637855	1.07763	0.704393	0.757535	0.618333	0.941424	0.790647	0.815322	0.978479	0.776148	0.540458	0.617339	0.847053	0.872561	0.721449	0.760846	0.924165	0.729608	0.902779	0.830559	0.980038	0.792581	0.89214
224	chr1	145200570	145471344	0.717506	0.794931	0.835228	0.746197	0.556794	0.781998	0.934659	0.849891	0.794015	0.662915	1.01023	0.922772	0.625266	0.882062	0.678328	0.735318	0.652306	0.691138	0.909464	0.825149	0.592665	0.779882	0.756601	0.954786	0.72724	0.83554	0.822726	0.941509	0.848265	0.689607	0.972504	0.512315	0.662132	0.556852	0.636954	0.624378	0.619611	0.561155	0.851493	0.65414	0.77578	0.53875	0.842169	0.807785	0.694008	0.941545
225	chr1	145471345	146013477	1.20383	0.739957	1.04314	0.808659	0.983772	0.832008	0.828865	0.899889	1.03364	0.732149	0.969222	1.09553	0.856039	0.874663	0.983725	0.680308	0.870351	1.04081	0.843548	1.30148	0.759351	1.0689	0.880216	1.02058	1.05051	1.02722	0.919703	1.09607	0.506896	1.52519	0.840225	0.96299	0.857093	0.76952	1.03779	0.796816	1.03641	0.973856	1.13209	0.716473	0.806927	0.968136	1.05228	0.557132	0.752342	1.03761
226	chr1	146013478	146590495	0.833561	0.76012	1.27102	1.2645	1.09374	1.33717	0.960122	1.08633	0.97952	1.03427	1.05127	1.08017	1.48893	1.01119	0.681712	0.739377	1.30756	0.774954	1.13904	0.875841	1.36357	1.05954	1.06766	0.735211	0.875666	1.01363	0.938174	1.18833	0.948508	1.0761	1.02793	0.798847	0.808911	0.819375	0.868796	0.779186	1.27048	1.15034	0.775105	0.658896	0.713809	1.00829	1.26972	0.728012	0.889708	1.05157
227	chr1	146590496	147187418	0.890139	1.04191	0.81349	0.953056	1.09543	1.09091	0.97921	1.23454	1.06105	1.04049	0.851524	0.914668	1.15886	1.05918	1.37034	1.16831	0.719721	0.842267	1.04197	0.92908	1.47422	1.00682	1.1642	0.823396	1.29671	1.08156	0.922027	0.83788	0.741836	1.11988	0.786023	1.07903	1.21981	1.46429	0.833206	0.976856	0.958809	0.959773	1.25047	0.901198	1.09649	1.17351	1.29462	0.884941	0.988151	1.04364
228	chr1	147187419	147678470	1.02317	1.20512	1.02193	0.978299	1.30052	0.807454	0.911574	1.06084	1.14667	1.3362	1.00893	1.17448	0.959745	1.26029	1.338	1.46926	0.916328	1.06007	1.16235	1.16379	1.00972	0.951346	1.35381	1.12217	1.51525	1.12006	0.932047	1.06638	0.776814	1.28496	0.859435	0.723413	0.891377	1.39909	0.547968	1.50142	0.716451	1.21867	0.919455	0.812367	0.885969	0.842173	1.54802	1.16	0.911048	1.26818
229	chr1	147678471	148250251	0.817822	1.07391	1.00419	0.537567	1.01249	1.04597	0.869612	1.24022	1.07907	0.969906	0.997086	0.993688	1.36234	0.875672	0.890677	0.827836	0.723491	0.95184	1.19523	0.931667	0.837454	1.08418	1.20771	0.848526	1.07132	0.919482	1.02117	0.811338	0.781743	1.01063	1.19978	0.979247	0.704951	0.812761	1.16695	0.918381	1.00097	0.883934	0.900206	0.623924	1.19936	0.981627	0.87974	1.31106	1.20222	1.01198
230	chr1	148250252	148827752	0.926611	1.14062	0.979587	0.754892	1.18675	1.17573	0.938927	1.18931	1.10889	1.03552	1.07185	1.30783	1.12329	1.05519	1.15751	1.19067	0.935272	1.1015	1.50171	0.763728	1.4927	1.1083	1.13422	0.887919	1.44756	1.04903	1.10286	0.848435	1.07736	1.14035	1.03077	1.30519	1.30891	1.30055	0.904575	1.3044	0.68716	0.947213	1.31224	1.13695	1.2107	1.30596	1.16529	1.03953	1.12574	0.89286
231	chr1	148827753	149106668	1.01209	0.737702	0.614656	0.888062	0.783347	0.81307	0.630133	0.895483	0.906794	0.653202	0.961514	0.7367	0.806496	0.839597	0.735582	0.897844	0.734073	0.911083	0.891083	0.704405	1.10088	0.784836	0.808765	0.85908	0.965644	0.819937	0.761047	0.789515	0.55133	0.807605	0.86953	0.674434	0.841915	0.757175	0.851682	1.07561	0.781454	0.575372	1.03305	0.746785	0.742741	0.88748	0.834977	0.824839	0.817708	1.19795
232	chr1	149106669	149546402	0.970087	0.732602	0.494364	1.20336	0.753545	1.24996	0.656539	0.921807	0.915121	0.689407	0.829269	0.70522	0.894097	0.492089	0.736588	1.27133	0.841236	0.865897	0.714218	0.771281	0.711372	0.787008	0.948525	0.916309	0.765404	0.831362	0.931273	0.913114	0.596526	1.10748	0.765171	0.937973	0.798062	0.547505	0.96164	0.848927	0.616168	0.679299	0.852292	0.631352	0.794859	0.742795	0.785757	0.830157	0.966259	0.645723
233	chr1	149546403	149963693	0.779188	0.844111	0.605979	0.729866	0.999112	0.959018	0.755728	0.960958	0.930041	1.0647	1.32653	1.09454	1.21828	0.97686	0.850882	1.03842	0.876004	0.7735	1.04591	0.971039	1.14428	1.12502	0.966783	1.78925	1.32082	0.932261	0.851192	1.31664	0.67276	0.982177	1.00768	0.939474	1.16926	0.981906	1.25519	0.965332	0.911083	0.940231	0.862828	1.0959	0.980962	0.855538	1.0398	0.753127	0.992114	0.88642
234	chr1	149963694	150544196	0.941944	0.80323	1.01442	0.999821	0.722241	0.655529	0.643491	0.936562	0.957994	0.655574	0.851204	1.26579	0.62436	1.00434	1.27261	0.991804	1.37616	0.660224	1.02414	1.1692	0.881617	1.06607	0.882721	1.45264	1.02724	0.678597	0.86319	0.785776	0.849682	1.57028	0.882511	0.95994	0.889547	0.916591	1.00367	1.17877	0.87971	0.96425	0.892585	0.813499	0.926566	0.925803	0.669147	1.13698	0.954649	0.98391
235	chr1	150544197	151119814	1.21163	1.06062	1.17005	1.58439	1.0874	1.27438	0.885386	0.845424	0.912275	1.59207	1.02494	1.42501	1.01347	0.965452	0.833704	1.02991	1.49918	0.664937	1.08068	1.00038	0.947906	1.06666	1.15418	1.22374	1.04818	0.791631	0.999321	0.850512	1.19169	1.21432	1.39815	1.03847	0.698603	1.41729	0.983541	1.41097	0.841679	0.947901	0.967071	1.1867	1.30865	1.04691	1.41754	1.0151	0.671628	0.964467
236	chr1	151119815	151655918	1.2248	1.13274	0.848842	1.33134	1.41695	0.936473	0.885522	0.989341	1.06585	1.10122	0.663124	1.28931	1.05812	0.81942	0.875257	1.40438	1.52235	0.478281	1.1303	1.25215	0.828598	0.99472	1.0578	0.954034	0.966083	0.967296	0.855579	1.0048	0.772873	0.784929	1.16882	0.959064	0.983061	0.891926	1.2431	1.39523	0.779346	0.974192	1.34654	0.612163	0.846653	1.26908	1.36337	1.21326	0.644034	1.08356
237	chr1	151655919	152197006	1.20953	0.818687	0.84412	0.958229	1.19676	1.75296	1.05327	0.889583	1.00033	0.60236	0.901377	1.03677	1.13252	1.16847	1.09136	1.33106	0.765138	0.685206	1.07949	1.30108	1.56351	1.0064	0.995145	1.23233	1.12474	1.18286	1.10068	1.14026	1.06533	1.58674	1.12317	0.760733	0.889841	1.12914	0.718333	1.13107	1.02127	0.73597	1.21309	1.28339	1.05746	1.02632	0.976045	1.15945	1.08537	1.13111
238	chr1	152197007	152788205	1.06279	0.816555	1.49946	1.23315	1.24734	1.34545	1.17561	1.01098	0.889744	0.955752	1.35245	1.21405	0.922136	0.69241	0.911484	1.16207	0.805257	0.722178	1.19779	0.720271	1.2079	1.07611	1.03373	1.32069	0.967755	0.888561	0.695576	0.849916	1.09912	1.05037	1.43766	0.992823	1.61109	0.628464	0.993384	0.974357	1.00102	0.947563	0.756023	0.982661	0.840687	1.03447	1.06936	1.17508	1.38716	1.00626
239	chr1	152788206	153374688	1.17763	0.980614	0.606123	1.24039	1.32325	1.23208	0.915103	0.98812	0.917971	1.09439	0.719947	1.3398	0.979174	1.02149	0.871373	1.31916	0.894438	0.801128	0.946338	0.975486	1.05823	0.940093	1.03638	1.30009	0.846555	1.00051	1.18425	1.10271	0.902214	1.08577	1.0167	0.933026	1.21779	1.11165	0.851568	1.20512	0.879165	0.963612	1.12782	1.15766	1.04968	0.787493	0.960916	0.892493	1.09131	1.12851
240	chr1	153374689	153943897	0.824388	0.787906	0.941407	1.47957	0.751666	1.33681	1.06144	0.905632	1.23589	1.09505	1.18139	1.21276	0.8895	1.05808	0.703992	0.889628	0.818613	0.737969	1.01137	1.21989	0.979127	1.05013	0.970878	0.894378	1.00161	1.25516	1.04167	1.24878	0.792114	1.02058	0.853352	0.716471	1.14771	0.80609	0.912382	0.803727	1.07744	1.18885	1.43343	0.836529	0.793903	1.02354	1.0666	1.07746	0.784451	1.00866
241	chr1	153943898	154509355	0.858534	1.09622	1.15105	1.13354	0.803734	0.661044	1.19722	0.767016	0.84589	0.71985	0.918909	1.0965	1.14881	0.986416	1.44471	1.45831	1.00744	0.698045	0.849304	1.33432	0.977815	0.95927	0.906201	0.717017	1.03793	0.977666	0.858652	0.864572	1.10911	0.961761	0.857567	0.93638	0.937745	0.70159	1.3295	1.03358	0.937854	0.944662	0.708084	0.99184	1.13721	1.14965	1.28768	0.701047	1.28386	1.14848
242	chr1	154509356	155035872	0.805734	1.08138	1.43988	1.6764	1.2891	1.76754	1.39537	0.999278	1.03298	1.54453	1.15757	1.03622	1.14805	0.814963	0.879853	0.591366	1.35058	0.720058	1.06715	0.551129	1.37623	0.908006	1.02029	1.02428	0.95273	0.772758	0.729499	1.04065	0.752428	0.770224	1.0968	1.02365	0.960275	1.13148	1.30667	0.983101	0.954303	1.04794	1.34436	1.03759	0.718421	1.00707	1.17697	1.29097	1.03493	1.15294
243	chr1	155035873	155597192	1.10282	0.770137	1.06755	0.881028	1.26245	1.16305	0.748054	1.03718	1.09352	1.25806	1.16646	1.18025	1.3847	0.688713	0.931688	0.783028	0.602464	0.621611	1.03758	1.06751	1.17759	1.03308	0.905708	1.16428	0.824837	0.950394	0.811676	0.947034	0.540122	1.18743	1.23791	0.957337	1.00304	0.769289	0.893367	1.09393	0.8372	0.777806	1.142	1.03906	0.548435	1.1336	1.61003	0.80874	1.06646	0.643952
244	chr1	155597193	156160924	0.361659	0.871686	0.763968	1.15603	0.807361	0.482946	0.899949	0.884889	1.03328	1.01237	1.03021	0.732216	1.0705	0.571642	0.904222	0.503308	0.812879	0.352261	0.950378	0.67123	0.724976	0.957451	0.928716	0.999106	1.20594	0.959843	0.706896	1.20365	1.20164	1.02421	1.0224	0.889209	1.04636	1.54359	0.760871	1.18066	1.12716	0.820696	0.859186	1.20069	0.525929	0.71388	1.27852	0.940657	0.776618	0.801089
245	chr1	156160925	156726436	0.954106	1.03644	1.05432	0.715688	0.938486	1.03176	0.981654	0.900453	0.896893	0.920286	0.890958	1.10575	1.13796	0.871909	0.795907	1.07756	1.12208	0.829799	1.09208	0.966393	1.10008	0.880606	0.944176	1.1448	1.02296	1.09901	0.803616	1.09419	0.739611	1.00952	1.09274	0.815895	1.30911	0.885076	1.21067	1.14002	0.631337	0.723186	1.17882	1.04682	1.10376	0.83745	1.46386	1.28787	0.749883	0.996213
246	chr1	156726437	157257301	1.13385	0.955462	1.38356	1.01426	0.996157	1.07281	0.876344	0.98334	1.0716	1.10175	1.08823	0.940618	1.24437	0.873465	1.07602	0.874233	1.02952	0.533768	1.10468	0.765541	1.17447	1.12255	0.866264	0.786024	1.12438	0.914317	0.858666	0.644404	0.814034	1.08559	1.18327	0.811263	0.95915	0.818566	1.09748	1.11652	1.17593	1.1373	1.43398	1.03456	0.914588	1.039	1.21347	1.23706	1.13936	1.12234
247	chr1	157257302	157844142	0.944879	1.0418	1.38418	1.39703	0.917395	0.745965	1.0991	0.899261	0.967779	0.93974	1.07419	1.02424	1.32959	0.93559	0.845724	0.942318	0.733312	0.660815	1.05684	0.69459	0.967507	1.1481	1.00034	1.14221	0.712573	0.943553	0.837937	0.999148	1.18188	1.38231	0.713543	1.08495	0.735138	0.711422	1.33729	1.15575	0.828108	0.905589	1.10785	0.687076	0.991099	1.43982	0.992974	1.3056	0.726111	0.978074
248	chr1	157844143	158423854	0.931985	0.780892	0.875744	0.715763	0.868176	1.08863	1.20041	0.89939	1.021	0.898938	1.22462	1.048	1.04813	1.08923	1.16116	0.754338	0.93104	0.810316	1.09629	1.58446	0.535181	0.862497	0.957954	1.2697	1.17737	1.23851	1.03845	1.21829	0.885055	0.75912	1.32924	0.693615	0.985171	1.07163	0.907733	1.07494	0.759464	0.813139	0.703689	0.931373	1.0377	1.10567	0.921199	1.38039	1.16771	1.23463
249	chr1	158423855	159037618	1.29293	1.04476	1.50419	1.13724	1.42576	1.23047	1.1255	1.13059	1.07981	0.978271	1.47135	0.991908	1.07118	1.00759	1.36	1.54171	1.08472	1.12068	1.21928	1.13685	1.30671	1.18794	1.05664	1.31896	1.05088	1.16268	1.05957	1.23036	0.896154	1.18841	1.09314	0.894347	1.34377	1.76572	0.859786	1.06306	1.12886	1.32333	1.1014	0.954401	1.04564	1.40504	1.04597	0.986776	1.1585	0.822423
250	chr1	159037619	159634668	1.22299	0.857732	1.38528	0.955246	0.872944	1.02743	0.971186	0.892798	1.0411	1.24861	0.969937	1.01895	0.87607	0.752909	0.899328	1.27556	1.47918	0.722794	1.06364	0.615625	0.530874	0.930512	0.990785	0.961373	1.33599	1.0338	1.05023	1.39872	1.13664	0.84067	0.698527	0.994044	0.879032	1.0149	0.55387	0.533274	0.978038	1.03711	0.986187	1.04346	0.698736	1.24939	1.25492	0.953188	1.02144	0.989936
251	chr1	159634669	160173468	0.925549	1.22997	1.30728	1.04855	1.3726	1.2332	1.0079	1.11053	1.11738	1.08785	0.954853	1.11895	0.862664	0.915998	1.36871	0.953322	0.932615	0.765226	1.44838	0.858667	1.43005	1.03688	0.972713	1.13047	1.07424	1.2191	0.995118	0.889431	1.14785	1.04744	1.3361	1.27545	0.79996	1.03129	0.845054	1.10768	0.802576	1.26141	0.993679	0.772798	0.915803	1.07617	1.24362	1.1357	1.22685	1.16704
252	chr1	160173469	160725925	0.766662	1.02376	1.14847	1.09321	0.677186	0.956986	0.865342	0.936224	1.16638	0.791562	1.14976	1.00989	0.935988	0.781247	1.32047	0.663841	0.855749	0.990394	1.22285	0.925231	1.04733	0.946184	0.880537	1.22499	0.861745	1.11661	0.888984	1.07339	0.817961	0.950208	1.16513	0.887747	0.977668	1.07622	0.933857	1.21509	1.16711	1.15775	0.838098	1.1368	1.32835	1.23174	1.09162	1.08232	1.23446	1.11307
253	chr1	160725926	161305874	0.901142	0.954303	1.04392	0.85248	0.910211	0.892925	1.23551	0.979548	0.974963	0.902032	0.753372	0.821038	0.916918	0.812837	1.27676	0.556314	1.07241	0.63617	0.993335	1.00468	1.03269	0.845616	0.882373	0.977253	0.954262	1.2032	1.07023	0.629583	1.07114	1.12976	1.27133	0.931174	1.10776	0.815418	0.873035	1.30672	0.695727	0.925388	0.769099	0.655333	1.05265	1.09967	1.11915	1.25666	0.884771	1.01331
254	chr1	161305875	161802710	1.14779	0.789171	1.11248	1.23872	0.795823	0.96065	1.07816	1.05113	0.964835	1.00136	0.807936	0.931719	1.02634	1.13485	0.685354	0.843042	0.946651	0.459715	0.815273	1.1665	0.638556	1.03798	1.26215	0.829169	0.831242	0.980018	0.757224	1.01808	0.90446	1.24756	0.911455	0.96911	0.918342	1.33684	1.08197	1.096	0.802164	1.19376	0.611678	1.023	1.0131	1.2302	1.11563	0.973831	0.989589	1.11456
255	chr1	161802711	162348888	1.34452	0.893675	0.99455	1.38275	0.88368	1.2201	0.750244	1.08546	0.794369	0.86648	1.10866	0.956827	0.99722	0.670364	1.02556	0.970636	0.977666	0.935143	1.02125	1.21267	1.0726	1.02838	0.977752	1.16889	1.21591	1.22624	0.951403	1.42033	0.872235	1.15159	1.29197	0.858029	1.1634	1.26741	0.995674	0.81591	1.1377	0.993311	1.24485	0.654515	1.09688	1.19672	0.852195	0.852489	1.06968	1.23803
256	chr1	162348889	162926125	1.19769	0.740012	1.42302	0.97179	0.797689	0.987974	1.11488	0.980829	1.00146	0.793401	0.937813	1.14149	0.880123	0.879313	1.16429	0.91009	0.846538	0.591588	1.04433	0.870174	0.719951	0.990063	1.06636	1.04912	1.01767	0.926908	0.985285	1.27361	0.85289	1.31511	1.05429	0.749489	1.04006	0.944068	1.08374	0.834797	0.905872	0.72217	0.881807	0.719787	0.953515	0.932564	0.984194	1.10375	0.917682	0.92038
257	chr1	162926126	163495169	1.40164	1.20228	0.96096	1.42722	0.660458	1.20692	0.782463	1.02147	1.08158	0.970259	1.06468	0.896566	1.04843	1.08687	1.00541	0.604928	1.09699	0.529058	1.09885	0.603781	1.05561	1.0259	1.02299	1.21587	0.982595	1.0119	1.02816	1.25494	0.875403	0.932842	1.26112	1.20919	0.851506	1.53871	0.913276	1.01532	0.843033	1.34322	1.0367	0.929326	0.848831	0.873006	1.36967	1.0385	1.08425	1.01466
258	chr1	163495170	164081890	1.03099	1.37281	1.3164	1.17518	0.819929	1.28499	0.93539	1.14963	0.944064	0.840687	0.785203	1.3194	1.04147	1.00763	0.891267	0.769061	1.20496	0.603176	0.878521	1.15382	0.888585	0.992387	0.716555	1.28802	1.014	0.887833	0.88814	0.867338	1.02777	0.943633	1.40273	0.994977	1.02104	0.816644	1.30312	0.925762	1.0478	1.10323	0.923398	1.28622	0.873669	1.07616	1.36718	0.950452	0.904956	0.965843
259	chr1	164081891	164676271	0.771777	0.63579	1.15343	0.999931	0.885896	0.894166	0.883565	1.00284	1.1004	1.05488	1.21279	1.06048	1.06847	0.633817	0.864669	0.840097	1.12369	0.813016	0.904995	0.83984	0.626175	0.97631	1.01051	1.27828	1.06381	0.712189	0.939403	1.21096	1.06811	0.943822	0.640949	0.844134	1.30572	0.823962	1.03482	0.982426	1.01437	0.943963	0.67821	1.19442	0.995664	0.845459	0.705994	0.821095	0.515122	0.833813
260	chr1	164676272	165237640	0.659652	1.0221	1.26646	1.18673	0.984213	0.94661	1.0862	1.03425	1.00632	0.924823	0.771857	0.773537	1.11668	1.44962	0.930405	1.22618	1.09268	0.715601	1.37244	1.05926	1.13001	1.094	1.01343	1.55023	0.893195	0.84339	0.947864	0.923675	1.05274	0.526483	1.25062	1.06631	0.740216	1.15669	0.952329	0.679512	0.842558	0.868923	1.02701	1.09407	0.811994	1.25071	1.13431	0.981226	1.15373	1.63362
261	chr1	165237641	165778434	0.780778	1.29029	1.63068	1.04105	1.56955	0.605343	1.02701	1.12703	1.23459	1.56176	1.26589	1.06503	1.1182	1.01172	1.3142	0.770912	1.09661	0.954004	1.06854	1.52775	1.28852	1.13218	0.770784	1.03705	0.703997	1.00599	1.07125	1.2805	0.845336	0.976549	1.25549	1.05263	1.27365	0.846954	1.27151	1.3977	1.15561	1.08491	1.26458	1.15611	0.897767	1.18703	0.940336	1.0383	1.00488	1.45518
262	chr1	165778435	166360792	0.728536	1.32918	0.716879	0.964667	1.049	1.09624	1.05106	0.923796	1.09236	1.06992	0.934998	1.24556	0.984684	1.04204	0.887492	1.56373	0.631086	0.660795	1.28679	0.849949	0.889806	1.20628	1.09679	1.28631	0.942267	0.87244	0.799074	1.47702	0.961355	0.997626	1.14985	1.13794	1.61428	0.643501	0.608409	0.674012	1.10667	1.04868	0.777725	1.25917	0.906025	0.926116	1.12754	1.08702	1.53134	1.02529
263	chr1	166360793	166974608	0.916047	0.686112	1.45715	0.626384	0.920123	0.80499	1.19313	0.892857	1.00944	0.99885	1.39325	1.24099	1.26709	1.32699	1.0331	0.791702	1.46389	0.630727	0.897392	1.14868	0.773331	1.04687	1.12668	0.976951	1.20695	1.09229	0.960486	1.20532	1.03215	0.558434	0.912568	0.762276	1.05459	0.964052	0.831643	1.10387	1.03047	1.16913	0.938466	0.836994	1.00017	1.24772	0.632018	0.792068	1.23806	1.39645
264	chr1	166974609	167537666	1.01239	1.17174	1.59735	1.38933	1.14445	0.891794	1.06652	1.18193	1.12895	1.13409	1.00986	1.24266	1.10871	0.95018	1.30493	0.928456	1.21912	0.620961	1.35631	0.802663	0.990895	1.01248	1.02806	0.964027	0.873475	1.27336	0.854981	1.30474	1.07226	1.28734	1.02818	1.17048	1.07627	0.83643	1.03413	1.00191	1.12177	1.12929	1.1975	1.19677	1.34923	1.02496	0.698257	0.747779	1.0566	1.41493
265	chr1	167537667	168103992	1.19806	0.927368	0.986619	0.903988	1.09506	0.885558	1.23928	1.18711	1.02554	0.457698	1.15898	1.20889	1.02295	0.83597	0.917573	0.672041	1.1348	0.64613	1.11729	1.17445	0.922101	1.23674	1.13491	0.930182	1.20643	1.12492	0.766111	0.903431	1.04678	1.60153	0.99244	1.26126	1.25496	1.05699	1.08979	1.26545	1.02698	1.1863	1.07295	1.06685	0.980693	0.916222	1.19311	1.03746	1.06321	1.29687
266	chr1	168103993	168662961	0.67997	0.668433	0.847167	1.00767	1.35326	0.623225	1.16365	0.971502	0.944418	0.906068	0.516021	1.49687	0.963023	0.747245	1.01546	1.06612	1.20772	0.441951	0.865438	0.80665	0.973501	1.05454	1.20352	1.36621	0.904024	1.12043	0.931568	1.20638	1.0856	1.46041	1.20587	1.11122	0.885721	0.963555	1.26442	1.31015	0.916809	1.04361	0.79373	1.07289	0.935549	1.32594	0.97617	1.08736	1.20107	0.592364
267	chr1	168662962	169217086	0.858954	0.748757	0.746039	1.02992	0.896497	0.860507	0.894383	1.2029	1.08762	1.00316	1.13656	0.791427	0.889719	0.84109	1.01643	0.835862	1.33582	0.327416	0.878876	0.844877	1.07285	0.958268	0.992478	1.03451	1.29123	1.18471	0.983632	1.1377	0.908599	1.23004	0.976019	0.916265	0.941693	1.24657	0.854361	1.11426	0.9686	0.926748	0.774353	1.05113	1.40348	0.863937	0.707665	1.41731	0.878519	0.902818
268	chr1	169217087	169795787	0.786968	1.07541	1.00658	1.19495	1.13461	1.24491	0.99892	1.01181	0.93322	1.20731	0.986999	0.757594	1.02873	0.942429	1.09714	0.732214	0.640921	0.414748	1.02871	1.11453	1.05374	0.939803	1.1444	1.24496	1.1163	1.15381	1.09665	1.35325	0.780521	1.27805	0.92568	0.815994	1.50278	0.599625	1.09514	1.39666	0.95068	0.879984	0.680194	0.773155	1.03463	0.823197	0.758986	1.24336	1.02565	0.996564
269	chr1	169795788	170410723	0.695693	0.734776	0.94988	1.13844	1.09398	0.535431	0.812262	0.998275	1.09007	1.16136	0.859915	1.22586	0.981224	1.09364	0.874872	0.986811	1.04096	0.389813	1.26887	0.930134	0.93055	1.0398	0.789761	1.26919	1.09969	0.980059	1.05048	0.986505	1.24067	1.04825	1.06079	1.2753	1.05118	0.800916	0.466403	1.27758	0.59383	1.24399	0.815232	1.21465	1.06956	1.02629	1.23371	0.777217	0.921972	1.11648
270	chr1	170410724	170971929	0.913256	0.799752	1.45993	0.986693	0.875383	1.07803	0.74078	1.18656	1.08418	1.14572	1.31501	1.21093	0.970483	0.733066	0.861832	1.25045	0.639234	0.314507	1.04792	1.15302	0.960241	1.06888	0.9159	0.860462	1.32923	1.1877	1.01581	0.754072	0.706897	1.07368	0.960017	0.920099	0.974891	1.06933	0.847462	1.09	0.673489	1.28419	0.775641	1.01251	1.37562	1.08753	0.911877	0.981546	0.923016	0.724117
271	chr1	170971930	171520101	0.697126	0.917356	0.872323	0.809963	1.13873	0.60088	0.772429	0.910037	0.947154	0.885271	1.36072	0.806053	1.37881	0.946485	1.20945	1.24866	1.1956	0.507923	0.87313	0.95469	0.751748	1.02286	0.861615	1.20498	0.672964	0.854432	0.695095	1.10336	0.651756	1.2375	0.769206	0.82588	0.942442	0.822027	1.20985	1.01527	1.05002	1.46115	1.31904	1.01598	1.14864	1.00803	1.00904	0.915996	1.00695	1.01791
272	chr1	171520102	172104104	0.993639	0.931706	1.08705	0.770128	0.854497	0.617898	1.01197	0.990229	1.05664	1.39645	1.23721	1.07263	0.860278	1.11313	0.814857	1.03734	0.838388	0.514049	1.1634	1.08729	1.20271	0.978211	1.03985	0.912824	0.82356	0.834279	0.930657	0.835572	0.701013	1.09897	0.705982	1.36866	1.12213	1.17568	1.04183	0.868003	0.732381	0.975262	0.700624	0.999201	1.18234	1.21738	1.01373	0.749808	0.905792	1.12422
273	chr1	172104105	172661128	0.8935	1.12989	0.759777	0.831905	0.907369	0.916017	0.989975	1.04365	1.06975	0.743372	1.20107	1.03789	0.969568	0.850232	1.04326	0.9643	1.06451	0.575403	1.24683	0.951532	0.838498	1.00438	1.12956	1.00331	0.720251	1.08878	0.800405	1.19488	1.08815	1.19614	1.09859	0.99974	1.08522	1.12032	0.975061	1.28526	0.766101	1.23416	1.21693	1.49038	0.851707	1.27053	1.42262	1.40749	1.08611	1.10018
274	chr1	172661129	173233587	0.625857	1.16347	1.22941	1.17547	0.862893	0.694135	0.818703	1.09894	1.11382	0.751329	1.19186	1.06629	0.926057	1.08782	0.703307	0.762903	0.608537	0.564862	1.10671	0.926126	0.806523	0.887097	1.04897	1.22847	0.916844	0.969748	0.776097	1.0508	1.04097	1.04774	0.785967	1.29765	1.41636	1.09141	0.932517	0.778506	0.871544	1.23681	1.01121	1.04243	1.32146	0.854714	1.08891	0.863721	0.99676	1.18038
275	chr1	173233588	173818743	0.848385	0.830221	0.992236	0.864346	0.73901	0.80993	1.08561	1.00446	0.949738	0.821334	0.838769	1.00151	1.18887	0.813637	1.13087	0.554765	1.11472	0.604521	0.904486	1.2455	0.779737	1.15544	1.06869	0.706656	1.18385	0.832562	0.882489	1.08617	0.930844	1.3874	1.02304	1.04076	1.20834	0.67055	0.705634	1.37959	0.764111	0.771565	0.92915	1.137	0.875015	0.815913	1.25962	0.645619	1.27666	0.875057
276	chr1	173818744	174431325	0.845482	0.993978	0.97279	0.933237	0.879393	0.934276	0.955592	0.974286	1.18118	1.11496	1.16397	1.13247	1.07891	0.940651	1.05012	0.792347	0.849513	0.710384	1.11257	1.06945	1.19701	1.06447	0.710906	1.44601	1.10971	0.987314	1.1867	0.767691	0.846526	1.29714	1.19332	1.04895	1.0438	1.59616	0.829601	0.86093	0.67707	0.920941	1.33064	1.12182	0.759292	1.36149	1.14463	0.842699	0.818486	0.934221
277	chr1	174431326	175045446	0.978184	1.25464	1.08397	1.4645	1.32984	0.909799	0.843438	1.08233	1.0658	0.765448	1.38825	1.43302	1.1424	0.997338	1.03326	1.27569	1.26295	0.590952	1.08523	0.916288	1.11908	0.727505	1.11539	0.93136	0.966205	0.979405	1.04865	1.05325	1.15033	1.06894	1.05733	0.98169	1.05157	1.09763	0.726546	1.06929	0.973905	0.96484	0.706454	0.759603	0.89023	0.936362	1.09222	1.14513	1.17057	0.53999
278	chr1	175045447	175597581	0.993492	0.805494	0.870103	0.939822	1.05151	1.11324	0.748765	1.12087	0.896354	0.877956	1.12213	0.967123	1.26844	1.06028	0.897475	1.01988	0.826524	0.487616	0.890281	1.16747	0.684218	0.957566	0.970491	1.26603	1.1704	1.19679	0.807466	1.1677	0.829874	1.26576	0.86474	0.503613	1.34485	0.956274	0.908786	1.15982	0.78867	0.914631	1.11688	1.05641	1.43434	1.26334	0.991704	0.885025	0.694556	1.00463
279	chr1	175597582	176166425	1.09786	0.971343	0.750098	0.983578	0.93926	1.04956	0.704017	1.09975	1.1593	0.861268	0.751492	0.790008	1.15885	0.883696	0.927015	0.733491	0.87388	0.659135	1.01014	0.849171	0.910329	1.02538	1.08786	0.702428	1.00564	1.0292	1.22699	1.0491	0.54149	1.26784	0.863181	1.2773	0.960667	1.21056	0.882563	1.21333	0.874665	1.1751	0.78957	0.790419	1.10904	1.23707	1.29826	0.842549	0.67729	0.982355
280	chr1	176166426	176770471	1.44188	0.800894	1.12425	1.18759	1.55092	0.826295	1.19173	1.19549	0.949705	0.947568	0.975123	0.85766	1.14343	1.23236	1.11755	0.69507	1.11765	0.718456	1.13712	0.656614	0.903348	1.01841	1.16933	1.29766	0.830869	1.13115	0.801069	1.20726	0.861862	0.861678	1.03326	1.06495	0.643666	1.0167	1.22281	0.932152	0.596007	0.951168	1.06326	0.927772	1.27291	1.09051	1.28156	1.24526	1.07437	0.936581
281	chr1	176770472	177289400	1.06592	1.08694	0.962214	0.995352	1.23169	1.14353	1.25199	1.34378	0.978414	0.568648	1.27015	1.6162	1.44374	0.813694	0.852051	1.17491	1.01986	0.541553	1.1005	1.20104	0.999116	0.886759	1.03098	1.04038	1.12035	0.832622	1.07556	1.04086	0.734896	1.1807	0.911932	1.18945	0.752477	1.10643	1.2937	1.30826	0.924954	0.87049	0.859545	0.897748	0.875154	0.929819	0.899798	1.17233	1.50009	0.634505
282	chr1	177289401	177850560	0.742877	0.803983	0.774845	0.887235	1.09202	1.09708	1.12937	1.01501	1.06556	0.830241	1.42481	1.01511	1.13561	1.13878	0.812563	1.46479	1.27241	0.427242	1.07704	1.14469	1.11619	1.11501	0.969096	1.37897	1.18703	0.922608	0.972739	0.766726	1.52271	1.21303	1.08178	0.782479	0.704799	1.0775	0.764511	1.03088	1.2105	1.39119	0.738047	1.61661	0.704033	1.10982	1.32833	1.08726	1.4831	0.97452
283	chr1	177850561	178396910	1.4467	1.05288	1.01016	1.24789	0.789239	1.34768	0.68507	1.18635	0.909277	1.13737	1.20157	0.860009	0.917681	1.03113	1.09547	1.03074	1.18718	0.644332	1.2623	1.04602	0.936292	0.950736	1.07576	0.775208	0.609739	1.03336	0.878713	1.0709	0.777583	0.922332	1.10104	1.12508	0.972411	0.934237	1.40066	1.03956	0.794352	1.46063	1.04517	0.970416	1.07067	1.17307	1.18386	0.847403	1.12197	1.05634
284	chr1	178396911	178938692	0.722928	0.874451	1.02252	0.904142	0.992309	0.942175	1.14986	1.25304	0.977822	1.24051	0.984108	0.89256	1.08629	0.807706	1.30013	0.967424	0.771703	0.493383	1.19742	1.28557	0.649142	0.885967	1.14147	0.78604	0.692043	0.791302	1.04624	1.04654	0.889965	1.23104	0.978266	1.06294	0.726658	0.756478	0.973974	1.03771	0.549342	1.13467	0.888922	1.45305	0.719183	0.7847	0.68641	0.917197	0.980772	0.767821
285	chr1	178938693	179558951	0.950993	0.92311	0.664054	1.09757	1.35194	0.933653	1.21056	0.89409	1.05497	1.12036	0.771267	1.19428	1.19024	1.09357	0.981573	1.63085	1.13785	0.415801	1.33541	0.442078	0.937888	0.927438	0.941743	0.873774	0.853532	0.803771	0.902444	1.00276	0.887538	0.919989	1.09308	0.901454	0.971997	0.804945	1.18881	1.24388	0.941	1.05481	0.796169	0.966555	0.963032	0.873528	1.0237	0.826213	1.31422	1.05755
286	chr1	179558952	180129944	0.970942	1.07595	1.31443	1.03652	0.61099	0.765542	0.979604	1.25129	1.05628	0.971918	1.05052	0.962973	0.871889	1.3118	0.717052	0.534342	1.55306	0.624316	0.952127	1.06646	1.50998	0.828804	1.02365	1.13508	0.835222	0.819813	0.932418	0.772651	0.96879	0.854082	0.719167	1.29789	0.764302	0.862997	0.825132	0.803882	0.94217	1.04105	0.758181	0.863254	1.32365	0.984626	0.627859	1.30635	1.33115	1.07332
287	chr1	180129945	180663940	1.31968	1.06099	0.975284	1.00487	0.927792	1.24867	0.890445	1.16174	1.01944	0.959653	1.3654	0.81669	0.9633	0.898337	0.76232	0.837713	1.11162	0.707375	1.08166	0.885961	1.24618	0.958872	1.08357	0.966486	0.978122	0.748958	0.952673	0.942457	0.878839	1.14998	1.16335	0.795876	1.18493	1.20657	1.19507	0.8768	1.02372	0.982952	0.797912	0.798742	1.48583	1.06551	1.04723	1.11226	0.881055	1.14409
288	chr1	180663941	181244148	1.02444	0.841384	1.39699	1.0571	0.986819	1.08933	1.03521	1.11556	1.00208	0.799869	1.13881	1.04627	1.10287	0.76881	0.930274	0.967961	0.943206	0.665151	0.880788	1.164	0.959154	0.925362	0.788017	1.0814	1.38265	1.12047	0.846473	0.922655	1.04776	1.03745	0.790698	1.03521	1.00835	0.794174	1.0654	1.08478	0.984509	1.1148	0.482431	1.21831	1.21212	0.62718	1.10495	1.23509	1.28349	0.9028
289	chr1	181244149	181769045	0.765003	1.06792	1.06474	1.09892	1.1795	0.993602	0.908385	1.06302	0.992862	1.05023	0.862819	1.11417	1.15223	0.812988	0.995882	0.832689	1.0486	0.678562	1.12451	1.02396	1.23952	0.899199	0.875097	1.19501	0.835584	0.908299	0.847858	0.618465	0.902841	1.24857	0.946975	0.910293	1.00535	1.00308	0.947012	1.25454	0.994423	1.2335	1.05637	1.09204	0.73697	1.04983	0.955259	0.959267	0.981096	0.862644
290	chr1	181769046	182352803	1.06391	1.08217	1.23876	0.836545	0.761473	0.936678	1.0652	1.13287	0.969817	0.681447	0.939156	0.841204	0.702133	1.06757	0.831652	0.917945	0.962189	0.710415	1.26292	1.041	1.47123	0.988469	1.09767	1.40854	1.0636	1.0182	0.798081	1.47836	0.632493	1.36299	1.20234	0.664994	0.987383	1.44184	1.22396	1.28543	0.845516	0.93309	0.825357	1.04564	1.66667	1.12905	1.0547	0.788793	0.818239	1.19972
291	chr1	182352804	182919946	1.06964	1.16636	1.4478	1.24086	0.889684	1.35861	1.20485	1.074	0.989593	0.749784	1.07789	0.94998	1.11567	0.973618	0.621789	1.10124	0.981955	0.567681	1.09695	1.39804	0.863409	1.01784	0.719368	1.23343	1.07817	1.19223	0.833393	1.11357	0.887463	1.10704	0.955872	0.852167	0.870294	1.54383	1.01905	1.23272	0.900574	1.19582	1.09406	0.881102	1.04728	0.942002	0.58968	0.739739	0.965147	0.602834
292	chr1	182919947	183468650	1.00311	1.03627	0.796855	1.29915	1.33287	1.06883	1.03612	1.04563	0.967386	1.07582	0.729042	1.11845	1.04567	1.04511	1.12919	0.539058	1.02905	0.855341	0.783879	1.04617	0.775125	0.997164	0.962437	1.31377	0.926839	1.12919	1.11568	0.917793	1.04982	0.974844	1.34034	0.873404	1.2105	1.49549	0.934884	0.834525	0.849075	1.42757	1.2017	0.852601	0.893752	1.09129	0.612731	1.34462	1.2688	1.1379
293	chr1	183468651	183991505	0.946559	1.12591	1.01459	0.620243	1.10569	1.17944	0.908712	1.07617	0.738395	0.911835	1.1169	1.14469	1.05349	0.916212	0.781852	0.737455	1.03541	0.817169	1.09429	0.923664	1.06442	1.03114	1.01822	1.15127	0.804591	1.08448	0.738811	0.892584	0.922783	0.96423	1.27935	1.08643	1.06171	0.563559	0.859968	1.26597	0.892168	1.01783	0.71864	1.0414	1.14097	1.10844	0.78446	1.11505	0.851772	1.17526
294	chr1	183991506	184525288	1.27638	0.877621	0.742515	1.13463	0.710544	1.09696	1.06864	0.997232	1.09694	0.771968	1.33661	1.08174	0.974363	1.14444	0.773033	1.33908	0.568518	0.787992	0.99965	1.05483	1.06686	1.08134	1.19458	1.06438	1.01343	0.772855	0.957135	0.89322	0.886602	0.727927	0.749229	0.914972	0.988299	1.07946	0.402361	1.41637	0.942055	1.23856	1.04819	0.880694	1.36771	0.843744	1.26257	0.999262	0.966529	0.844232
295	chr1	184525289	185088868	0.922917	0.912316	1.38817	0.887499	0.91484	1.32649	0.907622	0.981245	0.954159	0.961486	0.860137	1.16709	0.995763	0.813366	0.676917	0.565975	0.923192	0.578034	0.73368	0.810689	0.942503	0.994002	0.916441	0.802779	1.03319	1.02946	1.14426	0.791479	0.954863	0.940541	0.811372	0.970586	0.818931	1.89488	0.794999	0.95748	0.897827	0.814938	0.910114	1.11412	0.896169	0.75922	1.32815	0.869692	0.910456	1.20138
296	chr1	185088869	185654934	0.866407	0.674424	0.792256	0.660486	0.76999	0.679875	1.07236	0.907187	1.03582	0.886282	0.976908	1.15358	1.36348	0.93078	0.902913	0.809722	0.878823	0.492945	1.07351	1.19489	1.06106	0.917571	1.02543	1.71465	1.05045	0.713865	0.927938	0.700857	1.09392	0.659721	0.833908	1.18594	0.943415	0.906329	1.14546	0.717433	1.0504	0.903124	0.925917	1.44527	0.749954	0.932497	1.21715	1.1274	1.01254	0.664956
297	chr1	185654935	186216193	0.876276	0.737588	1.14896	1.19714	0.649271	0.540024	0.835626	1.03655	0.927519	1.20788	0.978809	0.845809	1.04021	0.781223	1.01857	1.42746	1.22305	0.742594	0.8605	0.925419	0.673453	0.819449	1.27048	0.948451	1.09915	1.02584	0.750142	0.98224	0.818469	1.01217	1.25473	1.04126	0.93123	0.764163	0.934167	0.923747	0.8586	0.978224	0.768189	1.03541	1.20735	0.947394	0.987727	0.798944	1.26726	1.26901
298	chr1	186216194	186803099	0.851065	1.00765	1.13794	0.741079	0.893776	0.888759	0.829344	1.10668	1.02121	1.05736	1.25692	0.697238	0.836809	1.10743	0.939257	1.01839	0.933834	0.69059	1.08995	1.07778	1.03215	1.02374	1.0605	1.29201	0.935998	1.05545	0.941711	1.10174	0.970651	0.794784	1.07165	0.883663	0.894776	1.33034	0.848692	1.3878	1.10406	0.989792	0.857584	0.563815	1.05418	1.11567	1.03519	1.12067	1.09733	0.984358
299	chr1	186803100	187413758	1.0257	0.861452	0.622425	1.2609	0.906512	0.980605	0.657651	1.09157	0.887003	0.945605	0.994826	0.924568	1.0644	0.889599	1.12868	1.06157	1.14764	0.679349	1.01752	1.29977	1.26587	1.06789	0.997188	0.893414	0.822929	1.10233	0.799553	0.787188	0.953023	0.688885	0.67196	0.983798	0.910364	0.799665	0.827802	1.55105	0.639218	1.17143	1.00302	1.28019	0.827071	0.765636	1.08605	0.846616	1.00936	1.05331
300	chr1	187413759	188059864	1.29434	1.0362	1.41474	1.05818	1.15603	1.23716	0.919219	1.13991	1.12413	0.845202	0.757341	1.09348	1.31712	0.820283	0.976313	0.656717	0.933204	0.704586	1.17413	1.13974	0.857785	0.92107	0.909346	1.12873	0.974563	1.09718	0.9729	1.19761	0.933419	0.865084	1.28295	1.2343	1.19114	1.12201	1.02266	1.09828	0.758153	0.793592	1.27018	0.969557	0.829119	0.766327	1.15432	1.18763	1.34162	1.08502
301	chr1	188059865	188730303	1.10752	0.801196	0.985293	0.877631	1.22746	0.726108	0.953097	0.906137	0.963313	0.904495	0.807705	1.22319	1.15703	0.912361	1.06073	1.13451	1.37774	0.657708	0.946588	0.913376	0.691323	0.924136	1.15996	1.21178	1.20302	0.885796	0.932074	0.625435	0.709821	1.2198	0.955931	1.31467	0.828098	1.33224	1.10351	1.02839	1.03978	1.17214	0.983029	0.844573	0.730991	1.12317	1.12204	1.13475	1.24601	1.01493
302	chr1	188730304	189426853	1.10289	1.25797	0.978806	1.137	0.884413	1.30159	0.968612	1.07545	1.13362	0.877375	0.968338	0.920006	1.064	1.25644	0.882274	0.873367	0.667506	0.684836	1.166	0.67229	0.838581	1.00895	0.963499	0.982098	1.00653	1.16407	0.937067	0.938774	0.615175	0.88562	1.1184	1.0603	1.2819	0.684563	1.06524	1.09842	0.817141	0.991475	0.692457	0.994398	1.23653	0.978602	0.947693	1.15611	1.20518	0.639058
303	chr1	189426854	190149227	0.972499	1.1395	1.1689	1.17793	1.08054	0.917472	1.13126	1.0507	1.00238	0.6937	0.859472	0.959226	1.35981	1.02849	1.08533	0.927539	0.625946	0.593995	1.15275	0.787647	0.559347	0.939346	1.01903	0.964949	1.16411	1.12874	1.03211	0.734846	0.912297	0.885648	0.751699	1.00246	0.732754	0.827567	0.841785	0.993016	0.840738	1.11549	0.98799	0.906532	1.07195	1.03123	1.33345	1.3154	0.918028	1.29662
304	chr1	190149228	190815777	0.942662	0.910541	1.08367	1.12431	1.14685	1.04463	0.982127	1.26035	1.18978	1.10765	1.1952	1.13683	0.964039	0.971084	1.07623	1.05598	1.15249	0.730765	1.13055	0.789456	1.25885	1.31208	0.999507	1.31547	0.982212	1.3392	1.28385	1.84358	0.904868	1.7983	0.784496	1.26071	1.16659	0.776595	1.44617	1.31464	1.05202	1.13462	1.37372	0.999193	0.717919	1.21011	1.53212	1.04222	0.971774	0.992232
305	chr1	190815778	191514303	0.586285	0.967671	0.833131	0.634085	1.38708	1.02589	0.833189	1.06028	1.1241	1.26481	1.13196	1.02203	1.06943	0.955335	0.958199	0.512377	1.18483	0.698084	0.773593	1.2074	1.17631	0.980608	0.761221	1.05535	1.0319	1.21981	1.06629	0.903015	1.05996	1.20469	1.35511	1.13964	1.53703	1.02681	1.42471	1.04619	1.20992	0.915066	1.12413	0.976087	1.68658	1.22207	1.38058	0.911067	0.964095	1.10229
306	chr1	191514304	192143702	1.01049	1.18015	0.97837	0.854926	0.981852	1.19478	1.04043	1.04449	1.01927	0.874882	1.32447	1.33129	0.820019	0.784077	1.30161	1.14516	0.897468	0.744703	1.06343	0.922276	1.35621	0.96498	0.830891	1.10008	1.12429	1.35205	0.970934	0.877956	0.822089	1.01593	1.2907	1.15137	1.03848	0.856594	0.766952	0.993275	1.01823	0.9031	0.828646	0.836078	0.934833	0.839177	0.966114	1.30065	0.774377	0.882968
307	chr1	192143703	192739406	0.802459	1.14402	0.846463	0.974722	1.06072	0.83169	0.993908	1.09325	1.08634	1.18617	1.05479	0.978721	1.04629	0.729774	0.862248	1.08637	0.846751	0.509361	1.03863	0.898653	1.04132	0.943521	1.07735	0.901968	0.733082	1.12648	0.932584	0.653012	1.05069	1.27404	1.05853	0.779791	0.989085	0.625042	1.2478	1.40876	0.972155	0.939495	1.16764	1.20244	1.16277	0.954848	0.89903	1.09914	1.4724	0.752944
308	chr1	192739407	193316536	1.09279	0.862321	1.01074	0.765782	1.11925	0.981172	0.788315	1.2528	1.03106	1.05195	0.904824	0.97042	1.09271	1.18937	1.38153	1.26792	1.14162	1.13547	0.857615	0.764288	1.21605	1.1544	1.11576	1.33383	1.14796	1.22417	0.862007	0.959618	0.750637	0.848797	0.832744	1.02973	0.859821	0.965702	0.769902	1.1207	1.15781	1.00302	1.06306	1.09585	1.4451	1.27929	1.40717	1.0602	0.964558	1.00304
309	chr1	193316537	193899029	0.979376	1.11121	0.939168	0.82814	1.13691	0.766773	0.84098	1.09293	0.937266	0.974896	0.879593	0.779028	1.03735	1.09668	1.02802	0.856474	1.2403	0.850785	0.599375	1.00515	1.53574	0.857643	0.960903	1.06752	0.963173	1.14543	0.828233	0.608632	0.962605	1.15052	1.09147	1.12708	1.03779	0.964974	0.504121	1.1292	0.966765	1.07882	0.844628	1.14526	1.1658	0.937933	1.25754	0.814407	0.921153	0.813477
310	chr1	193899030	194548290	0.924029	0.865753	1.41759	1.06131	1.01857	1.07501	0.955533	1.11082	1.08457	0.976339	1.68018	0.760792	0.870907	0.906079	1.13691	0.656343	0.775794	0.980696	1.01816	0.915158	0.907758	0.753467	0.763607	1.01269	0.971823	0.996238	1.08961	0.728167	0.716848	0.861171	0.905243	0.924498	0.976801	0.736735	0.883932	1.27892	1.17608	1.09589	0.795292	0.947225	1.11403	0.984959	1.35322	0.921261	0.793662	0.938139
311	chr1	194548291	195216318	1.17012	0.845616	1.1496	1.29044	0.983375	1.06129	0.904241	0.895097	0.993403	1.05052	0.945138	1.38606	1.18648	1.27851	0.981271	0.734596	0.995106	0.957318	1.14229	0.795964	0.877014	0.970963	1.02272	1.18481	0.874101	1.16868	1.00571	0.792113	0.946324	1.16781	1.04511	0.770338	1.13397	0.625245	0.890838	1.46819	1.30227	0.901603	1.16688	0.694603	0.8573	0.986735	1.03905	1.09426	0.962266	1.20057
312	chr1	195216319	195883573	0.738068	0.887164	1.10955	1.07184	0.92489	1.02343	1.14305	1.3521	0.970687	1.22258	1.00043	0.960851	1.26956	1.07258	0.885168	0.837869	0.965369	0.799943	0.977031	1.13611	0.849122	0.99501	0.989464	1.04432	0.64734	0.986479	1.07397	0.983932	0.629944	1.01675	0.992737	0.785581	1.10719	1.24016	0.976522	0.764178	0.826711	0.940599	0.902159	1.02864	0.636482	1.194	1.22661	1.01439	1.17035	1.04756
313	chr1	195883574	196499443	1.04531	0.870192	1.06294	1.13626	0.93593	1.27996	0.863445	0.970068	1.00135	1.01403	1.45557	0.919918	0.907923	1.10545	1.20025	0.827797	1.05811	0.881684	0.803705	0.97717	1.1321	1.17239	0.8982	1.12074	1.04842	0.986725	1.01797	1.42815	1.19444	0.936819	0.713141	1.31051	0.546932	1.3087	1.21932	1.55906	0.924356	1.15142	1.0995	0.843896	0.871861	1.06216	0.936291	0.913784	0.834968	1.22298
314	chr1	196499444	197115034	1.08211	0.944034	0.930248	1.43908	0.790704	0.895335	0.796107	0.994039	1.10598	1.19296	1.23611	1.07669	0.926336	1.24542	0.879239	0.675464	0.945287	0.809367	0.979961	0.744	0.908742	1.03131	0.890083	0.938247	0.754205	1.24238	0.794633	1.02057	0.997161	0.935169	0.807047	0.887245	0.82443	0.822693	1.65228	0.839215	1.17422	0.993412	0.750581	0.871918	0.858251	0.726804	0.883828	1.03254	0.75287	1.3748
315	chr1	197115035	197724837	1.12238	1.15478	1.33007	0.963787	1.01112	1.02808	0.851369	0.928744	0.924315	1.2724	1.1391	1.15349	0.996745	1.08314	0.709236	1.08819	0.591899	1.13109	1.29322	1.0958	1.08771	0.91804	0.961861	0.590379	0.963482	0.925263	0.790821	0.93509	0.930891	0.957802	0.637504	0.962539	0.999117	1.06688	1.0601	1.23638	1.15101	1.07504	0.944199	1.08359	1.42659	1.17207	0.990883	0.92612	0.860036	1.23227
316	chr1	197724838	198329827	1.17046	1.11111	1.27338	0.778514	1.03215	0.840274	0.996605	1.12185	1.03578	1.21693	1.20105	0.962272	1.01402	0.917945	1.15639	1.56182	1.16467	0.755447	1.42703	0.933754	0.653612	0.9824	1.10049	1.27754	1.08761	1.01207	0.976775	1.19883	0.785598	1.18413	1.28419	0.763981	0.888369	1.05306	1.01652	0.942353	0.638401	0.999928	0.886646	0.82748	0.943997	0.688983	0.884573	0.970885	1.34622	1.08682
317	chr1	198329828	198884527	0.781404	0.942441	1.05759	1.19673	1.26971	0.941863	0.901916	0.929701	0.905531	0.953652	1.00505	0.99393	0.941412	0.529433	0.771112	0.782532	0.959187	0.763737	0.764331	0.672473	1.24382	0.912523	1.00969	1.08589	0.833225	1.03947	0.97038	1.2299	0.8639	1.09639	1.02352	0.804025	0.789154	1.09136	1.05132	0.581775	0.988199	0.699137	0.949841	1.07069	0.973474	1.00405	0.881583	1.03595	0.639155	0.762172
318	chr1	198884528	199472382	0.700326	0.912363	0.983555	0.999014	0.911481	1.37618	0.853111	0.984536	0.850774	0.546731	0.983455	1.06922	0.991434	0.833453	1.25088	0.946857	0.787018	0.688714	1.01307	0.797602	1.23252	1.03702	1.08276	0.857349	0.819429	1.21944	0.740119	1.30585	0.933942	1.17824	1.10893	0.517099	0.902719	0.577179	0.873244	0.844214	0.959628	0.801955	0.924435	1.12411	1.01225	1.17692	1.00722	1.06764	1.12933	0.946414
319	chr1	199472383	200058568	0.701801	1.22663	1.02876	1.10406	1.00605	0.895399	1.12803	1.11813	1.11012	0.883624	1.02651	1.60629	0.832811	1.0583	0.97891	1.37845	0.693649	0.995599	1.08761	0.791177	1.16072	0.989237	0.974134	1.25616	0.979699	1.27398	0.892404	0.955391	0.690095	0.886401	0.827989	0.896034	0.676347	1.10743	1.10714	0.955314	0.762739	0.993829	1.05283	1.11194	1.24792	0.886649	1.32141	0.999826	0.794848	1.18374
320	chr1	200058569	200597926	0.901686	1.31234	1.16247	1.40362	1.03399	1.20147	1.19887	0.899256	0.998478	0.828575	1.02655	1.50185	0.717306	0.832132	1.02029	0.997965	0.473423	0.969003	0.810969	0.621262	1.29058	0.901432	0.906746	1.33654	0.879651	0.923309	0.898175	1.08734	1.00741	1.08571	1.17185	0.903907	0.947962	0.817689	0.918642	0.709759	1.23523	0.655294	0.640203	1.13591	1.309	0.722047	1.33017	1.08894	0.838493	0.678568
321	chr1	200597927	201162783	1.03548	1.15968	1.03308	0.991823	0.767308	1.27553	1.00844	1.17747	0.823387	1.2018	1.00747	0.837323	1.25784	0.74108	0.981623	0.932179	0.998022	0.653429	1.18635	1.19225	0.94252	0.980601	0.903428	1.02917	0.769391	0.788833	0.858227	1.01407	1.21295	1.12243	1.14943	0.782656	1.04624	0.817404	1.13138	0.883763	1.02021	0.71553	1.00855	0.895673	1.3442	0.934471	1.036	0.960323	1.18008	1.04265
322	chr1	201162784	201697350	1.17683	0.81088	1.85026	0.728939	0.659794	0.861598	1.0761	1.06878	0.920861	1.25422	1.38074	0.618417	0.997971	0.875489	1.19455	0.913157	0.740581	0.663878	1.58731	0.90952	0.679606	0.926468	0.99932	1.34304	1.05737	1.26917	0.982126	0.675822	0.925291	0.982619	1.05281	0.709444	0.921746	0.815057	0.690064	0.940344	1.03929	1.16025	0.895868	1.00868	1.0024	1.15421	0.689569	0.768747	0.905142	1.27374
323	chr1	201697351	202246493	0.984954	0.976337	1.11566	0.974278	1.30197	0.699991	1.1307	1.03847	0.935251	0.64246	1.00476	0.972992	0.876673	1.10267	1.18971	1.13059	0.997647	1.02736	1.04348	0.875652	1.13758	0.915556	1.0129	1.55489	1.14	1.09116	1.0265	0.806482	0.641156	1.3162	0.732143	1.17279	0.922777	1.14589	0.894536	0.882094	1.14834	0.807053	0.877664	1.12289	0.889108	0.753753	0.943928	1.12625	0.863466	1.39757
324	chr1	202246494	202771679	1.03634	0.954483	1.38585	0.851902	0.970812	0.912736	1.17563	1.08315	0.96602	1.04449	1.17889	0.964644	0.994924	1.09754	1.24483	1.09403	0.881837	0.966952	0.943034	1.44532	1.42505	0.984141	0.923143	1.02177	1.01604	0.937077	1.03338	0.601693	0.89385	0.837977	0.892517	1.03993	0.922671	1.33259	0.958519	1.08993	1.21147	0.920576	0.634844	1.22228	0.777468	0.726682	1.24149	1.30171	1.04885	1.0077
325	chr1	202771680	203318771	1.11884	0.861749	1.25063	0.745271	0.778422	1.15176	0.879782	1.01378	0.922045	0.82307	0.858407	1.0228	0.966757	0.882625	0.865282	0.732889	0.927523	1.25339	0.928878	0.891418	1.02126	0.919131	1.02199	1.18346	1.20132	0.927475	0.886731	1.21402	0.955252	1.22778	1.11112	0.905135	0.900018	1.10891	0.8512	0.995486	0.862501	1.24749	0.832934	0.981632	1.12791	0.726961	1.13156	1.26262	0.831804	0.829312
326	chr1	203318772	203867204	0.958934	1.05039	0.900731	1.2914	0.913901	0.960582	0.864224	0.679367	0.987044	0.960199	1.13163	0.996339	1.09629	0.594717	1.2128	0.670645	1.02457	0.711831	1.02424	1.03741	1.03561	0.905469	1.16934	1.2652	1.00404	1.11757	1.10265	1.21015	0.740896	0.71392	1.06295	0.53218	0.786399	0.730318	0.916168	0.715427	1.027	0.796375	0.489869	0.556444	0.612394	1.39739	1.03199	0.988109	0.922693	0.828515
327	chr1	203867205	204404814	0.903781	0.794465	0.727017	0.858822	1.15785	1.14326	0.741904	0.974303	1.03924	0.506122	0.862381	0.680489	0.929799	1.17482	0.940512	0.933887	0.957852	0.597009	0.918602	0.772919	0.536681	0.94242	0.930489	0.916178	0.690169	1.1836	0.905312	0.720175	0.73951	1.15363	0.620645	0.587179	1.05203	1.15021	0.732295	1.54774	1.33731	0.637961	0.877779	1.00026	0.936495	0.959916	0.929282	0.82477	1.17879	1.22579
328	chr1	204404815	204919940	0.509573	1.1956	0.845272	0.805885	0.923754	1.06899	0.919865	0.980507	1.14572	1.12655	1.34774	0.962617	0.700431	0.764489	0.831231	0.605504	1.36655	0.941171	1.30229	0.974501	0.684324	1.01248	0.803278	1.14266	0.821655	0.85218	0.993745	1.28198	1.03654	0.88969	1.17641	0.975889	1.14606	0.959981	1.45371	0.587252	1.08822	1.02752	1.1032	0.797419	1.26705	0.964534	1.08113	1.21549	1.0588	1.08523
329	chr1	204919941	205458217	0.656917	1.10254	1.19818	0.980696	0.755279	1.16015	0.988138	0.998192	1.05285	1.26916	0.753964	1.14356	1.17321	1.01077	0.959183	1.19059	0.99188	0.711889	1.22827	1.06617	0.546386	0.906869	0.997717	0.98391	0.954799	1.01374	1.1569	1.01592	1.10843	1.20424	1.14179	0.964635	0.677152	0.819223	1.04802	1.04267	1.17096	0.885745	1.0295	1.03626	0.815607	0.783388	0.677909	1.13334	1.14359	1.30913
330	chr1	205458218	206123887	0.839965	0.879399	1.07794	1.00997	0.840985	1.18653	1.04063	0.644961	1.02721	0.85705	1.17864	1.26524	1.29327	1.11745	1.06376	0.754567	0.973508	0.906519	1.10002	1.14396	0.484599	0.893311	0.995014	1.04749	0.718661	1.02754	0.862679	1.20289	1.08503	1.49337	1.05458	0.771629	1.38399	1.18951	0.993403	1.38471	1.17802	1.03297	0.951858	1.14569	0.883045	1.00393	1.21068	0.81627	1.16102	0.871104
331	chr1	206123888	206702715	1.28825	0.940221	1.19733	0.665141	1.44019	0.811392	0.847971	1.13681	0.991955	1.16331	1.2068	0.701331	1.10264	0.831903	0.923961	0.829437	1.05767	0.654823	1.14155	1.07022	0.670139	0.975289	1.11595	0.978348	1.1011	0.867214	1.05583	1.06137	1.02604	0.933077	0.447067	0.971705	1.04594	1.04172	1.20974	1.41225	1.14103	1.00511	1.12388	0.687461	1.04868	1.07394	1.15763	1.19991	1.32446	0.828242
332	chr1	206702716	207220205	0.81318	0.833185	1.04256	0.755689	0.898593	1.03991	0.894525	0.967293	0.979371	0.983063	1.06967	0.859703	0.872097	1.00496	0.856033	1.14674	0.997118	0.709638	0.966913	0.735862	0.776901	0.969003	1.24249	0.889007	0.709484	0.950301	0.831806	0.740487	1.00249	1.32151	0.991149	0.851284	0.738103	0.850116	0.930078	1.14948	0.990415	0.754341	0.999577	0.478652	0.918057	1.18393	1.21286	0.995313	1.14158	0.966315
333	chr1	207220206	207795412	1.33208	0.826526	1.63438	1.11921	0.877185	1.08827	0.845292	0.944929	0.843835	1.13013	1.07848	1.27276	0.840073	0.7947	0.636131	0.826927	1.01029	0.378786	1.24675	0.716145	0.885561	1.15485	1.06908	1.05908	0.930525	1.12982	0.914964	1.14366	0.967142	1.08002	0.992055	1.10573	1.04938	1.27574	1.04862	1.01059	1.23045	0.574564	1.07708	1.04287	1.30789	0.815163	1.38203	0.862928	1.21637	1.27052
334	chr1	207795413	208336398	0.85276	1.01165	0.86275	1.25272	1.28763	1.07329	1.08142	1.06292	1.01007	1.29688	0.997808	1.0033	1.27798	1.22579	0.980208	0.761558	0.873329	0.572139	1.13274	1.28182	0.794481	0.915422	1.08192	1.18395	1.28408	1.20508	0.832243	1.13783	1.06217	0.879047	1.43437	1.24576	1.37041	0.688233	1.37783	0.967003	0.991973	0.975947	0.909312	0.851047	0.969353	1.15794	1.09032	0.596657	1.06737	0.933582
335	chr1	208336399	208878922	1.30422	1.01747	1.14073	1.10997	1.10499	1.00992	0.890952	0.724104	0.97388	1.27782	1.17905	0.966129	1.20579	1.21377	1.09748	1.12249	0.857316	0.919427	1.03924	0.893254	1.09685	0.894437	1.21726	1.59255	0.899604	1.00813	0.864553	0.926854	1.07872	0.50165	0.825592	1.27094	0.829245	0.882199	0.847655	1.06616	1.19113	1.05522	1.51701	1.21893	0.773353	0.94117	1.21164	1.41961	1.11963	1.22555
336	chr1	208878923	209462261	0.867661	1.14145	1.18599	0.844278	1.15153	1.03867	1.01935	0.957249	1.13626	1.01952	1.39324	0.887797	1.07007	0.856366	0.761639	0.756692	1.18197	0.723363	1.29812	1.2466	0.898493	0.971757	1.04828	1.40974	1.13599	1.12027	0.922067	1.47701	0.741326	0.99417	0.836937	1.14304	0.933707	1.04067	0.955936	1.15591	0.916849	0.855804	0.865911	0.922692	1.32273	0.74933	0.738579	1.21632	0.989253	0.829191
337	chr1	209462262	209983585	1.14469	0.871052	0.964963	1.19278	0.998189	1.26497	1.12552	1.27667	0.963567	1.47621	1.8306	1.25258	1.13066	1.11726	0.715621	1.00168	0.701478	0.980155	1.15899	1.15862	0.96418	1.12872	1.10881	1.05627	1.0351	1.07652	0.966666	1.01538	1.00353	1.08782	1.33316	0.923158	1.05344	0.965421	0.881455	0.944826	0.947078	0.919917	1.4639	0.850797	0.806024	0.771989	0.949733	1.04367	0.654405	1.0299
338	chr1	209983586	210566546	0.807824	0.865857	1.43577	0.967098	0.983382	0.982667	0.884592	1.05721	1.09091	1.08151	0.894524	0.696169	0.961034	1.13685	1.06107	1.45905	0.855349	0.701662	1.0187	0.933103	0.583114	1.06454	1.21309	1.09703	1.03829	1.06132	1.03003	1.02274	1.16628	0.59673	0.810365	1.16205	1.13716	1.13235	1.3562	1.13823	1.26599	1.01145	1.13866	0.904778	0.846885	0.888062	1.20233	0.778581	1.17958	0.810201
339	chr1	210566547	211109538	0.922047	1.13097	0.838362	0.865701	0.854378	0.76323	0.848617	0.982356	0.997656	1.07362	0.717379	0.656944	1.09905	0.99314	0.807897	1.06637	0.849461	0.728828	1.40644	1.18895	0.668969	0.871525	1.13335	0.742512	1.29776	0.947408	1.19908	0.98976	0.953954	1.03968	0.857162	1.16471	1.10213	1.11441	0.823976	1.57774	1.09145	0.916136	0.858643	0.938935	0.962467	1.18417	0.95414	1.01237	0.780932	1.15967
340	chr1	211109539	211726239	0.832569	0.926335	0.884311	1.38598	0.995765	1.17269	1.02289	1.35779	1.07244	1.24286	0.749351	0.777089	1.27873	1.44392	1.06033	0.985358	1.29063	0.705509	0.98082	0.980932	1.19031	1.19451	1.17054	1.24323	1.0502	1.20521	0.874056	1.09817	1.01492	1.07369	0.862386	1.19936	0.922164	1.34489	1.05836	0.804149	0.940603	1.01742	0.911344	0.793544	1.0275	1.11293	0.969433	0.870496	0.940494	1.1544
341	chr1	211726240	212278562	1.01266	0.886111	1.06105	1.12236	1.07922	1.09977	1.03729	1.19779	0.985121	1.0794	0.990971	1.13248	1.34264	0.979633	1.05874	0.719444	1.44681	0.511992	0.954878	1.61715	1.014	0.969507	0.925302	1.07754	1.06034	1.02444	0.980808	1.24084	0.865919	1.16573	1.31595	1.13875	1.10267	0.894158	1.00434	0.883288	1.10304	0.961549	1.224	0.991481	1.28263	0.844721	1.40062	1.16052	1.36624	1.10699
342	chr1	212278563	212833904	0.94251	1.28837	1.16577	1.11731	0.720543	1.17887	0.888382	0.904834	0.999567	0.857255	0.739485	0.831064	1.13343	0.832665	0.789103	1.04856	0.823757	0.778854	1.01672	1.39439	0.713997	0.915855	1.27569	0.804984	0.863377	0.993855	0.991574	0.999236	0.841928	1.23406	0.86648	1.13248	1.14879	1.31602	0.851484	1.46023	1.03347	1.10521	0.940593	0.753131	0.565899	0.747064	0.74199	0.997654	0.989661	1.0099
343	chr1	212833905	213426832	1.05381	0.846819	1.07032	0.775531	0.836947	0.890547	0.94855	0.848962	0.859386	0.924081	0.870682	0.779076	0.785154	0.888275	1.18826	1.15549	0.747277	0.447493	0.873935	0.892607	0.884258	0.963114	1.13388	0.985366	1.03857	0.93987	1.14698	0.767047	0.763673	0.600328	0.977024	1.03986	0.903003	1.27759	0.565934	1.61602	1.07773	1.01171	1.19996	0.696874	0.870084	1.04437	1.02338	0.894195	0.72268	1.25266
344	chr1	213426833	213958886	0.854465	0.897464	1.23801	0.956778	1.01838	1.25504	1.08392	0.932813	1.01892	1.06591	0.986747	0.88957	0.767203	1.13466	1.259	1.10527	0.862837	0.462103	1.07829	0.947485	0.920645	1.09817	1.07039	1.06853	0.895966	0.874637	1.11772	0.868631	0.789746	1.08894	1.18561	0.924738	0.939876	0.938993	1.28853	1.3396	1.00233	1.22214	1.62496	0.801805	1.29782	1.24558	1.12451	1.04021	1.22704	1.12641
345	chr1	213958887	214510062	0.857226	0.832729	1.12186	1.08734	0.935121	1.12006	1.01068	0.799577	1.09694	1.1794	0.826709	1.0075	1.26165	1.10229	1.04425	1.089	1.31567	0.747102	1.07684	1.02955	0.834178	1.06151	1.17146	1.28805	0.846398	0.851455	1.16866	0.94674	0.933746	1.03992	1.1058	0.694899	1.27889	0.999452	1.11926	1.13993	1.08165	1.309	1.29556	0.707801	0.93174	1.05218	1.10115	0.832919	1.0818	1.24818
346	chr1	214510063	215052594	1.21126	0.667047	1.12451	1.00609	1.51167	1.52226	1.08677	1.11527	1.05243	0.954571	1.21667	1.02056	1.13882	1.17248	1.30173	0.500589	0.745263	0.651265	1.40052	1.04283	1.42645	1.1042	1.2342	0.997134	1.15999	1.04152	1.09377	0.704615	0.779965	1.16456	1.20985	0.814817	1.14892	0.945489	0.791417	0.912772	0.77388	0.887537	0.987839	1.11136	1.24411	1.03904	1.31674	1.21646	1.08124	1.25188
347	chr1	215052595	215631757	1.19606	0.848589	1.52551	1.00912	0.977229	0.987707	1.15766	0.934526	0.95953	0.956296	1.33337	1.01031	1.14971	1.09236	0.884107	1.10972	0.836156	0.960896	1.18075	1.12725	1.1484	0.928343	1.21734	0.908569	0.767036	1.05869	0.904657	1.07157	0.739653	1.38038	0.764206	0.942616	0.994822	0.944685	1.12004	1.18888	0.916129	0.965355	1.29349	1.1424	0.913667	1.01073	1.3976	1.00144	1.26502	1.00106
348	chr1	215631758	216214893	0.921934	0.694238	0.954668	0.844931	1.3683	1.28963	0.826261	0.793214	1.00401	1.1535	1.3653	0.902375	1.14745	1.2585	1.11962	0.968606	0.809768	0.565177	0.917603	0.778981	0.77495	0.996177	1.04031	1.128	1.22761	1.01991	0.798143	1.08093	0.834489	0.960023	0.931466	1.00599	0.808917	0.83684	1.23275	1.00839	0.888448	0.860201	1.20927	1.18334	0.693398	0.915976	1.15892	0.936194	1.32078	1.27084
349	chr1	216214894	216804639	1.10929	0.931486	0.963557	1.10172	1.18134	1.26528	1.11181	0.883538	1.09116	1.01197	1.09813	0.553296	1.20429	1.14256	0.684694	0.938584	1.06008	0.500346	1.17876	0.966489	0.808694	1.03185	1.08201	1.44262	0.984569	1.063	0.976382	1.16813	0.838988	0.796272	0.804314	0.917124	1.23618	1.21966	1.19416	1.25225	0.842957	0.89051	1.03667	0.999682	0.775199	0.853953	0.882427	0.873717	1.01982	0.997649
350	chr1	216804640	217376949	0.928731	1.15682	1.23474	0.760411	0.929265	1.07487	0.91913	0.904505	0.946506	1.00102	1.07247	0.993659	1.30642	1.27416	1.05306	1.06509	0.823994	0.828284	1.24299	0.872337	1.00205	1.04113	1.12694	1.13452	1.06149	1.08208	0.804149	1.02063	0.785288	1.27401	0.931124	1.10575	1.18363	0.601306	0.75643	1.35555	1.07024	1.10651	1.0084	0.8292	0.899335	0.798434	0.769259	1.04751	0.70315	1.0659
351	chr1	217376950	217984524	1.06561	0.804742	1.19534	1.30197	1.28595	1.36653	0.822156	1.01818	1.11076	1.52611	1.36386	1.01403	1.00885	1.24463	1.44976	0.741704	0.994942	0.893523	0.840244	0.732455	1.0373	0.990507	0.878859	0.881095	0.896327	1.06609	0.916484	1.27556	0.781278	1.66457	0.856259	1.06915	1.18531	0.936679	1.0834	1.18626	1.049	0.928982	0.917918	0.804648	0.857265	1.35529	0.992641	1.37254	0.73271	0.837913
352	chr1	217984525	218581792	0.84123	0.76299	1.13426	1.15235	1.09306	1.47261	0.757048	1.04624	1.16353	1.22398	1.03267	1.10437	1.13586	1.09028	0.869763	0.656511	1.36403	0.63086	1.22459	1.03562	1.32371	1.0091	0.98428	1.09126	1.09264	0.961818	0.913463	1.23647	0.933084	1.26007	0.938491	0.877255	0.957555	1.0586	0.612704	1.36418	0.870287	0.911544	1.1472	0.751646	1.3231	0.705621	1.37528	1.15181	0.93981	1.21185
353	chr1	218581793	219155411	0.850965	1.2121	0.97746	1.20431	1.30326	1.06577	0.840776	0.995666	0.965524	1.15614	1.40293	1.25023	1.13491	1.03103	0.863105	0.924443	1.05755	0.97552	0.906645	0.895817	0.963273	0.938568	0.95624	0.965413	1.1254	0.956607	0.803154	1.08771	0.749158	1.28633	0.964007	1.11435	0.97304	0.749185	1.10078	1.10519	0.977706	1.0926	0.700723	0.909871	0.821181	0.91303	1.29617	0.952689	1.12625	0.887555
354	chr1	219155412	219737708	0.770008	1.10823	0.937274	1.24426	1.33623	0.944636	1.13442	1.00387	0.961125	1.30139	1.09017	1.23858	1.08325	1.00293	0.985705	0.776512	1.19498	0.869318	1.24235	0.83844	1.36833	1.02839	1.04361	1.08409	0.954422	0.965028	0.820781	1.74707	1.01706	1.4435	0.773797	1.14389	0.946023	1.20014	0.976204	1.23911	0.819192	1.02053	0.725155	0.87533	0.847892	0.955156	1.2848	0.958567	0.80422	1.19499
355	chr1	219737709	220317364	1.18135	0.920344	1.17083	1.08862	0.861577	1.01493	1.09189	0.883752	1.14416	0.81774	0.912951	0.697225	0.890649	1.25322	1.11184	1.39137	1.24285	1.03605	1.12528	0.850226	0.969067	1.0033	0.98366	1.09905	0.962824	1.00863	0.862423	0.897876	1.05144	0.971393	1.14883	0.860622	1.09898	0.819971	0.853007	1.06798	1.01993	0.973824	0.685906	0.999642	0.977417	0.805878	1.29155	0.74941	0.885878	1.23932
356	chr1	220317365	220890747	0.732188	0.983749	0.726183	1.03509	1.3788	1.14369	0.892664	1.18002	1.10953	1.27567	1.30204	1.15765	0.93947	1.05257	0.940695	0.983937	0.826864	0.996872	1.04705	1.05804	1.45314	0.962989	1.15542	1.26319	1.1161	1.00002	0.628663	1.19525	0.985134	0.987517	0.976339	1.11135	0.850327	0.874217	1.11238	1.24654	0.93496	0.939838	1.08701	1.03258	1.11463	1.17252	0.991291	1.21758	0.951732	0.978857
357	chr1	220890748	221453004	1.10888	0.718076	0.777668	0.80219	1.07655	0.920913	0.990641	1.00049	0.907689	0.953169	1.05854	1.06642	1.12301	0.968494	0.953875	0.73613	1.03539	0.767339	1.31217	1.13718	0.800919	0.905949	1.0336	1.02776	1.05552	0.83458	0.923122	1.18258	0.867144	0.797347	0.906006	0.858849	1.2393	1.08886	1.37876	1.28639	1.19532	0.937652	0.714831	0.908893	1.2959	1.02672	1.17695	1.0746	1.05711	0.890025
358	chr1	221453005	222001728	1.3573	0.892262	1.38581	0.724792	0.960777	0.586937	1.16188	0.871394	0.949611	0.834772	0.89886	0.940923	0.92235	0.905321	0.799942	1.14441	0.881159	0.656837	1.24941	0.755026	0.917537	0.819737	0.777768	0.753779	1.09171	0.959476	1.12132	1.44439	0.660626	1.10594	0.657022	0.894483	1.03641	0.89973	0.60534	1.04129	0.862003	0.981718	0.844859	0.941441	0.73747	0.982982	0.728069	1.18148	1.11735	0.953678
359	chr1	222001729	222541919	1.05312	0.679321	0.757786	0.854667	1.06696	0.898646	0.893056	1.02463	1.21122	1.01446	0.79863	1.00034	1.02601	1.22073	0.945481	0.995937	1.35444	0.610993	1.21129	0.806755	0.790745	0.898742	1.1836	1.03556	0.831624	1.17326	0.885123	0.977392	0.505474	1.18485	1.22309	1.3601	1.19895	0.657744	0.979251	1.44663	1.17945	0.956871	1.06803	0.958295	0.897776	1.00315	1.07442	1.07613	0.881717	0.783651
360	chr1	222541920	223112359	0.650474	1.01721	1.22341	0.823784	0.982603	0.909514	0.882618	0.830804	0.936781	1.31487	0.878857	0.99575	0.924711	0.858782	0.847025	0.4344	1.41054	0.536931	0.973329	0.725696	0.66838	1.02655	1.03493	1.01467	0.645857	1.10625	0.943569	1.30771	0.775673	0.911641	1.30095	1.13521	0.68156	0.793649	1.1887	1.01216	1.20755	0.763109	0.653496	0.792418	1.04727	0.980501	0.707869	0.933884	0.945393	1.1087
361	chr1	223112360	223663742	1.08245	0.815454	0.951318	1.32524	1.45979	1.03993	0.801846	1.17763	1.09356	0.973698	1.22986	0.836236	0.817341	1.24153	1.38992	1.2794	1.12571	0.601883	1.08705	0.868659	1.15158	0.782562	1.12328	1.52555	0.700292	1.04537	1.13465	0.848909	0.738467	1.06504	1.04765	1.06236	0.89587	1.01233	0.998917	1.13612	0.94135	1.10656	1.00194	1.17077	0.813859	1.12352	1.26389	0.85804	1.46289	0.860607
362	chr1	223663743	224227255	1.23206	0.9347	0.801139	1.11653	0.716659	0.97643	0.79958	1.03276	1.0987	0.71381	0.843753	1.2753	0.96157	1.42676	1.21357	1.07759	1.34137	0.813039	0.659847	0.941604	0.696775	0.764653	0.944217	0.957445	0.710437	0.929465	0.92603	0.617757	0.626841	0.577543	1.09754	1.01714	1.00554	1.02191	1.1559	1.48624	1.23836	0.981057	1.15477	0.767986	1.10416	0.777015	0.897457	1.2323	1.20917	1.38364
363	chr1	224227256	224789690	1.0957	1.30669	1.01091	0.869128	1.42102	0.603388	1.1139	1.06052	0.991698	1.1284	1.12542	0.935777	0.644601	1.093	0.9191	0.920381	0.804454	0.88957	1.03734	1.0966	0.797487	0.853555	1.23808	1.24371	0.956773	1.0081	1.05217	0.977522	0.907483	0.946451	1.05613	0.863318	1.18822	0.669828	1.18981	1.33098	1.36134	1.03164	1.2632	1.02651	0.883456	0.909809	1.22111	0.985765	0.986093	0.89273
364	chr1	224789691	225354268	1.23951	1.09246	1.10861	0.928435	1.00381	1.4042	0.841158	1.11666	0.925937	1.19725	1.67746	1.07179	1.19733	0.890025	0.918977	1.23032	0.881033	0.85023	0.973767	0.613412	0.688783	0.936094	0.933577	1.17782	1.42259	1.02079	0.783219	1.13265	0.822673	0.94846	0.865537	0.707372	0.993137	1.18171	1.35284	1.12272	0.869248	1.01086	0.817764	1.00547	1.04701	1.10698	1.14161	0.97045	1.12851	0.989061
365	chr1	225354269	225943339	0.869614	0.967906	1.57868	1.00946	1.20922	0.924186	0.714221	1.01065	1.15815	1.08054	1.22577	1.42083	1.20028	0.929351	0.892483	1.25066	1.15954	0.852249	1.03338	0.621406	0.629587	0.92364	1.26715	1.1269	0.831609	1.26113	0.812932	0.907669	0.960025	0.64998	1.06641	1.11177	0.943135	1.13022	1.1727	1.59577	1.11289	1.21871	1.27765	1.03517	1.23843	0.945809	1.0187	0.824049	0.852065	0.980661
366	chr1	225943340	226516852	0.859831	1.26785	0.722015	0.903334	0.958212	0.696838	0.670275	0.913592	0.973097	1.08615	0.883355	1.07834	1.08467	0.809824	0.818579	0.840576	0.937578	0.62104	0.835761	0.703083	1.83616	0.936176	0.981702	1.32399	1.05086	0.889856	1.01606	0.946783	1.20922	0.768692	1.14342	1.1485	1.23961	1.3408	0.911645	1.19795	0.856154	1.10933	0.986126	0.772666	0.877711	0.972217	0.884898	0.666746	0.700536	0.652547
367	chr1	226516853	227034810	0.891128	0.852288	0.952833	0.949673	1.34867	1.12608	0.78023	0.70446	1.06272	0.992505	1.3055	1.01285	0.872333	0.638789	0.78846	1.17435	1.18137	0.823926	0.944705	0.63558	0.376875	1.00631	1.29192	1.14656	1.11432	0.948214	1.00842	0.886648	0.878838	0.942047	0.735657	0.82808	0.911896	1.44285	0.945452	0.900798	1.06043	1.01721	1.23765	0.823915	0.777853	0.960335	1.16451	1.08719	1.1818	1.08489
368	chr1	227034811	227634271	0.574556	1.24604	1.12213	1.3465	1.13222	0.72394	1.12424	0.943046	0.887349	1.13869	1.10165	0.909226	1.13351	0.614327	0.919397	1.11549	0.728217	0.833092	1.20738	1.00657	0.948847	0.935847	1.05449	1.033	0.709891	1.14552	1.03805	0.631049	0.861111	0.903797	0.796326	0.96466	1.32654	1.04544	0.540031	1.25086	0.747335	1.04387	1.1573	0.859067	1.29074	1.20684	1.03143	1.21638	0.958941	0.961661
369	chr1	227634272	228242139	0.938054	1.06776	0.91958	1.01387	0.90807	1.0691	0.907348	0.894382	0.915638	1.15852	1.10276	1.0637	1.12751	0.832141	0.95729	0.931081	0.941236	0.782133	0.872829	1.04707	0.98699	0.943557	1.16968	0.772328	1.07829	1.01175	0.886516	0.732369	0.647547	1.10258	0.891455	0.812131	0.836405	1.04522	1.09739	1.21012	1.02536	1.21204	0.861259	0.908039	0.915714	0.762214	0.870086	0.956831	1.05113	1.12186
370	chr1	228242140	228882840	1.06948	0.863739	0.807878	1.06848	0.813827	1.43043	0.958704	0.950661	0.851297	0.72276	0.620622	1.12522	0.816922	0.57181	0.887322	0.829082	0.604563	1.1029	0.84663	0.996488	0.511888	0.887624	0.998491	0.968577	1.09044	0.924507	0.876867	0.777762	0.865635	0.8044	1.00336	0.670149	0.922779	1.3847	0.751531	1.08788	0.798894	1.21054	1.35654	0.842206	0.99593	0.689252	0.700413	0.77293	1.2014	1.04145
371	chr1	228882841	229390362	1.11262	0.950279	1.25075	1.12754	0.804728	1.07735	1.07582	0.820041	0.805082	0.989938	1.03112	0.878206	0.880516	0.822897	0.943704	1.17548	1.10596	0.690793	0.773834	0.998964	1.08454	0.872201	0.880828	0.992052	0.813618	1.17763	0.9609	0.869817	0.864088	1.2046	1.33085	1.25169	1.40216	0.927725	1.21059	1.08135	1.00278	0.851624	1.02649	1.02116	1.09885	1.23089	0.950991	1.26788	0.921469	0.761891
372	chr1	229390363	229969357	1.03691	1.00683	1.05194	0.724327	0.782596	1.17588	1.25	1.0556	1.05011	0.862668	1.12229	1.09191	0.834457	1.07749	0.964786	0.974401	1.13715	0.858302	1.2104	1.01443	1.20593	0.981953	0.951809	0.957758	1.00614	1.22459	0.90324	0.556905	0.940983	1.11167	1.09321	1.06783	0.892166	0.908547	0.859938	0.972417	1.08112	1.26323	1.22291	1.18836	1.18649	1.07245	1.21442	0.999086	1.00244	1.22614
373	chr1	229969358	230506526	0.921123	1.32559	1.10378	1.38548	1.23516	0.775224	1.235	1.12263	1.19019	1.10113	1.41828	0.725714	1.0318	1.22537	1.17402	0.788925	0.879219	1.10355	0.894215	0.948674	0.764494	1.17001	1.29863	1.08991	0.722298	1.30147	1.04909	1.62336	0.964959	1.77146	1.18088	0.939893	1.04724	1.10248	1.04536	1.01896	0.871511	0.969124	1.06631	0.962526	0.687061	0.829569	1.17159	1.12873	0.989374	0.602928
374	chr1	230506527	231039051	0.907321	1.01187	0.871179	0.864605	1.06479	1.39728	0.835332	1.09993	1.08143	0.973378	1.01853	1.09807	1.30776	1.00241	0.60532	0.828317	1.03368	0.698844	1.19405	0.632207	0.804563	0.955049	1.11338	1.08913	0.836587	1.02058	1.05648	1.22186	0.91124	1.65315	1.04249	1.10325	1.07302	0.960637	1.01789	1.65132	0.720477	1.2803	1.15036	1.15153	1.07832	1.07668	1.24174	1.44212	1.35991	0.984241
375	chr1	231039052	231603731	1.21516	0.914703	0.852418	0.868461	1.0495	1.29903	1.16152	0.902734	1.00134	0.677014	0.991906	0.778427	1.03051	0.741703	1.14012	0.807388	1.74025	0.648686	1.19292	0.95369	0.962422	0.857956	0.727139	0.722032	0.829279	1.04969	0.814622	0.847037	0.769832	0.810334	0.995719	0.820501	0.67964	0.846918	0.916369	0.701898	1.21962	1.07938	1.2686	0.882753	1.11413	1.01625	0.514448	0.721589	0.899076	0.844258
376	chr1	231603732	232158879	0.97409	1.24046	1.4156	0.868901	1.18442	0.932237	1.03743	1.13176	1.07382	1.10501	1.28232	1.01582	1.12343	1.00031	0.868048	1.2951	1.40146	0.876255	0.953439	1.04542	0.824282	0.936162	1.18555	0.843905	1.05017	0.967827	0.903361	1.08036	1.04925	1.07682	0.791999	1.11865	1.13846	0.827453	0.907691	1.14825	0.837635	1.13688	0.965945	1.09336	1.24339	0.969185	0.976765	1.25081	0.88035	1.03751
377	chr1	232158880	232716385	0.800716	0.89991	0.67495	1.08031	1.29362	0.996284	1.10117	0.896223	1.07414	1.55271	1.31353	1.21433	1.22972	0.985079	1.3233	1.45296	1.22486	1.11812	0.865073	0.999249	1.24192	0.954649	1.06343	1.02427	1.04838	1.27892	1.04281	0.8586	1.20456	1.34373	1.08892	0.930888	0.86631	0.956454	1.00365	1.43028	0.936191	1.08701	1.33907	1.04969	0.701432	0.708945	0.989046	1.09843	0.750172	0.936156
378	chr1	232716386	233273096	0.961352	0.915708	0.599993	0.616615	0.955746	0.941943	0.838196	1.10979	1.08785	1.14591	0.764903	1.267	0.831008	1.39243	1.07554	0.987918	1.18853	1.16797	1.06697	0.980431	1.31899	1.17172	1.10506	0.88937	0.91092	0.904704	0.98222	1.02784	0.756066	0.694068	0.847372	1.13788	1.08017	1.16339	1.03997	0.888614	0.959983	1.27181	1.22837	0.753621	0.943153	1.39429	1.35435	0.885399	1.30201	1.20408
379	chr1	233273097	233847521	0.675633	1.21582	0.67184	1.02361	0.831726	0.888618	1.01628	1.02986	1.03963	1.12449	1.25565	0.793529	1.32769	0.990414	0.991505	1.23096	0.904405	0.953594	1.17819	1.20164	0.812406	0.982187	1.05343	1.01977	0.69457	1.00179	0.823403	0.888579	1.18439	1.23283	1.02162	1.10503	1.15211	0.618207	0.647068	0.486669	0.873085	1.29739	1.18733	0.881495	0.791679	0.88326	1.1501	1.14591	0.963817	0.602651
380	chr1	233847522	234447779	1.2383	0.695558	1.00102	1.09519	1.21037	0.842281	0.766156	1.04191	1.06558	0.873594	0.85897	1.06651	1.01352	1.39204	1.23676	1.39802	1.04766	0.841918	1.35779	0.739573	0.694627	0.954062	1.10086	1.0905	1.05505	0.789121	1.04934	0.865605	0.516244	1.12076	0.90137	1.12588	0.998989	0.557342	0.887085	0.858546	0.992454	1.1325	0.886001	0.633579	0.639807	1.18819	1.19589	1.25076	0.740799	0.815502
381	chr1	234447780	234947533	0.811447	0.944105	1.08074	0.618163	1.18718	0.939586	0.785283	0.813498	0.96324	1.22676	0.799713	0.96998	1.08679	1.37314	1.16889	0.937182	1.21129	0.694197	1.14503	0.937707	1.26189	0.869555	1.18123	0.989935	1.02334	0.973229	1.15986	0.79815	1.38727	1.26949	1.25563	0.951381	1.22818	1.39641	1.13133	1.39458	1.01022	1.43761	1.23364	1.22654	1.10407	1.0038	1.36217	1.05987	1.25197	0.81364
382	chr1	234947534	235557147	0.858211	1.0745	1.43248	1.27644	1.29488	1.04914	0.868863	1.07252	0.897845	1.25043	0.80404	0.952844	1.05508	1.0033	0.769283	0.94443	0.975343	0.738315	1.19743	1.01533	1.00086	0.935883	1.19631	0.923116	0.78236	1.06546	0.773139	1.45142	0.579096	0.817414	0.980548	0.710887	0.891403	1.01711	0.98384	1.11835	0.859219	0.765714	0.957703	1.02536	0.816143	1.14618	1.09993	1.05455	1.20909	1.31033
383	chr1	235557148	236131394	1.21412	0.992206	1.17391	0.964904	0.95759	0.621603	1.02905	1.16913	1.00077	1.13376	1.22031	0.860876	1.07932	1.00514	1.05898	0.800595	0.4466	0.968936	1.10158	0.761713	1.0458	0.880344	0.757846	1.00422	1.03972	0.899406	0.845348	0.816037	1.22894	1.52271	0.693667	1.22515	1.31933	0.943752	0.857417	1.06542	0.910344	0.812779	1.11594	1.46352	0.98683	1.07264	0.703136	1.41831	1.01	0.825514
384	chr1	236131395	236720309	1.04285	0.929188	1.22376	1.14176	1.16851	0.833472	0.958332	1.18491	0.853072	1.24666	1.24003	0.645567	0.941871	0.970968	1.16228	0.578669	1.0834	1.08841	0.787488	0.882411	0.682315	1.14459	1.10723	1.28834	1.3043	1.02685	0.931136	1.12084	0.800218	1.26011	1.63553	1.20042	1.066	0.768855	1.36774	1.13972	0.842921	1.01821	0.791774	1.20113	1.28528	0.837584	1.20809	0.851346	0.907564	0.983854
385	chr1	236720310	237322870	1.04339	0.844235	0.464743	0.689321	1.25809	1.03725	0.805683	1.05938	0.849161	1.25336	1.33528	0.781026	1.22173	1.31191	1.04597	1.22021	0.793255	0.973881	1.09945	0.865586	1.10292	1.03676	1.16614	1.40546	0.924384	0.872525	0.887154	1.00219	0.841098	1.09331	0.891936	1.09729	0.998979	0.750568	0.820371	1.27913	1.08804	0.688096	0.987355	1.26863	0.992483	1.07208	1.02392	1.4177	0.868207	0.880429
386	chr1	237322871	237940378	1.04157	0.991437	0.782103	1.08718	1.1703	1.17244	1.04293	1.05716	1.0263	1.04439	1.24019	1.13832	1.29681	0.992176	1.22904	1.4281	1.03222	0.811227	1.14139	0.858149	0.986849	1.02737	1.1195	1.30845	1.09686	1.01471	0.959593	1.22197	0.987703	0.851811	1.00774	0.726183	1.08848	1.15297	0.871108	1.63329	0.940866	0.913885	1.24732	1.26542	1.86287	0.91681	1.10273	1.09243	1.08073	1.20143
387	chr1	237940379	238535865	1.10576	1.19645	0.871761	0.623045	0.770749	1.26961	1.08753	1.20645	0.946647	1.14304	1.08203	1.0541	1.18583	1.11508	1.09689	1.08139	1.13108	0.779106	1.20088	0.840168	1.03479	0.930723	1.16414	0.956233	1.2133	0.985368	1.04109	0.962218	0.759251	1.28787	0.846624	1.25357	1.16454	1.07641	1.57375	1.25251	1.10413	1.03062	0.955953	1.12596	0.987976	0.856823	0.857623	1.09911	1.08538	1.18718
388	chr1	238535866	239158283	1.13808	0.87442	0.89701	1.0946	0.843274	1.17451	0.745084	0.929385	1.12468	0.980979	1.70819	0.936508	1.07279	1.10113	0.999298	1.29299	1.43718	1.24074	1.11739	0.878638	0.870957	1.08756	1.19508	1.165	1.03084	1.01177	0.906893	1.59595	1.0427	0.884198	0.672269	0.854097	0.906896	0.622282	0.93132	1.18783	1.1801	1.21636	1.23475	1.09525	1.05835	1.00517	0.857216	0.988413	1.29674	1.20126
389	chr1	239158284	239731159	1.09408	1.07336	1.26375	1.37413	0.928268	1.23088	1.01862	0.973693	1.02355	1.21777	1.39121	0.95091	1.15937	0.694192	1.17173	1.15921	1.25695	1.47606	1.04523	1.05489	0.818991	1.06671	1.49034	1.20348	1.12247	1.18957	0.989515	0.998755	0.761479	0.969595	1.263	0.925552	0.739745	1.13891	0.971849	1.04401	0.97191	1.38747	1.14215	1.09313	1.59656	1.06359	1.32092	1.1426	1.2534	0.986122
390	chr1	239731160	240309818	1.3712	1.03887	1.23528	0.997048	0.809047	0.509587	0.73444	1.03558	0.993971	1.07126	1.04318	0.933157	1.21799	1.21515	1.07537	1.04574	1.00584	1.28441	1.0648	1.11036	0.708484	1.13921	1.19974	1.0309	1.04836	1.02906	1.12136	0.856537	0.769025	0.795143	1.00753	0.77117	0.873584	0.649298	1.03602	1.03321	0.913079	0.860538	1.26773	1.18278	1.25291	0.990278	1.01107	1.09825	0.891491	0.810288
391	chr1	240309819	240865619	0.892983	1.18241	1.27977	1.17515	1.13489	0.831992	0.996638	0.948843	1.04768	1.12323	1.14005	0.91691	0.767779	0.830391	0.969561	1.13922	1.1231	1.07888	1.42967	0.963744	0.544715	1.10406	1.13925	0.64327	1.2545	1.17809	0.771156	1.01079	0.71758	0.976968	1.39036	0.7987	1.20531	1.10627	0.999055	1.17401	0.949858	1.16515	0.972391	0.944999	1.0279	0.861909	1.12426	0.823573	1.45738	0.934354
392	chr1	240865620	241446557	0.950029	0.938882	1.01201	0.993617	0.873705	0.664253	0.92097	0.880765	0.942612	1.16366	1.34398	0.999671	0.8582	1.03896	1.31338	0.849086	0.847708	0.858132	1.19188	1.04741	1.63862	1.06306	1.12743	1.1646	1.31312	1.1861	0.948874	1.2901	1.0145	1.01463	1.20804	1.02601	1.01797	1.06054	1.42765	1.01968	1.03648	0.836257	0.869006	1.15458	1.18086	0.721693	1.12788	0.98767	1.2503	1.16912
393	chr1	241446558	242053590	1.39784	0.826773	0.947295	1.45236	1.17505	1.08951	1.04266	0.923725	0.916993	1.26985	1.68788	0.941453	0.747231	0.925089	1.18765	1.32101	0.671773	0.936688	1.00194	1.20286	1.23508	0.923334	1.11524	1.11964	1.35692	1.02318	0.908692	1.30512	0.733603	1.3639	1.35345	0.867406	0.973627	0.95508	1.14152	1.42276	0.996954	1.5073	1.05189	0.929978	0.86662	0.890814	1.5314	0.953209	1.26317	0.656259
394	chr1	242053591	242637973	1.13619	0.949105	1.31835	1.3997	1.07764	1.2288	1.0848	0.806639	1.16636	0.947942	1.51165	1.01427	0.887497	0.887419	1.00247	1.38557	1.18756	1.29759	1.18989	1.18373	1.14663	1.09123	1.03436	1.14901	1.04472	1.03912	0.889993	1.11818	0.768997	0.957015	0.991164	1.11063	1.22868	1.06531	1.36	1.74753	1.05708	1.0211	0.840752	1.22413	0.88158	1.13455	1.50878	1.11151	1.08072	1.0452
395	chr1	242637974	243226390	1.17045	0.898671	0.701386	1.28842	1.64039	1.25556	0.785801	1.23854	1.04799	1.27831	0.919072	0.96543	1.11425	0.836859	0.92429	1.15561	1.2144	0.770883	1.17963	1.44633	1.06558	0.889934	0.835171	1.31399	1.11329	1.25661	1.19064	1.20179	0.647535	1.35728	1.10318	1.13755	1.3624	1.27852	0.858061	1.65403	1.15688	1.12936	0.875212	1.05466	0.913414	0.824685	0.877954	1.18113	1.33786	1.5898
396	chr1	243226391	243804672	0.994007	1.01332	1.57219	0.699577	1.39655	0.995393	0.804351	1.21737	1.0364	1.39199	1.10119	1.29261	1.22793	1.0023	1.31436	1.36945	0.764204	0.717077	1.17072	0.900546	1.48523	0.985256	1.18974	1.02981	1.42157	1.23643	0.864459	0.941635	0.707149	1.39272	0.812049	1.36171	1.52973	1.35085	0.947561	1.13081	1.28887	1.22463	0.782214	0.99295	1.32395	1.28027	1.54346	1.01635	1.22866	0.886917
397	chr1	243804673	244341875	0.850644	0.799415	0.879834	0.984556	0.84982	1.10422	1.01444	1.00985	0.94058	1.27026	0.770028	0.919127	0.626479	1.15371	1.18389	0.986935	0.988231	0.757453	0.872557	0.752405	1.07012	0.965291	1.24255	1.05038	1.17648	1.02556	0.982581	0.702446	1.09919	1.32544	0.902678	1.23395	1.55005	1.03414	1.14392	1.25813	1.12822	0.841084	0.865427	0.898577	1.06757	1.21007	1.19646	1.16475	0.75405	1.08876
398	chr1	244341876	244911556	0.960838	0.949956	1.02461	0.8285	1.22395	0.781159	0.854406	0.893546	1.01668	0.992618	0.811363	0.694334	1.0279	1.22632	1.26591	0.870802	1.02502	0.708911	0.926708	0.91683	1.11312	0.788414	1.0022	0.934311	1.29916	0.926614	0.950759	0.839407	0.794906	0.945952	1.04654	0.928287	0.900305	1.55144	1.45319	1.02515	0.867942	0.783358	0.583168	1.03492	0.998022	1.13063	0.968527	1.00275	1.00802	0.548476
399	chr1	244911557	245474238	1.31869	1.02269	1.08828	0.788146	1.37591	1.19864	0.949507	0.950266	1.05194	1.13247	0.568452	0.699015	0.817053	0.861981	1.07731	0.985658	0.954956	0.745168	1.14152	0.711118	1.16456	0.937369	0.990611	1.26504	1.14196	1.34012	0.978576	1.64669	1.30843	0.66289	0.791057	0.852302	0.662272	0.883849	0.840268	0.933622	1.08112	0.892954	0.983364	0.922239	0.770717	1.132	1.04968	1.01854	0.696908	0.865472
400	chr1	245474239	246008178	1.14433	0.854863	0.920109	0.91045	0.926381	1.07483	0.790819	0.914115	1.12117	1.0635	1.19051	1.04756	1.08297	0.981643	1.35744	1.11314	1.04616	1.04609	1.22095	1.26668	0.934933	0.926029	1.0284	1.02764	0.57736	1.147	0.813456	1.1568	0.836307	0.993559	0.963369	0.967605	1.04311	0.666935	1.05375	1.21952	0.939574	0.957762	1.01371	1.17338	1.14757	1.43564	1.19401	0.816508	0.971007	1.01931
401	chr1	246008179	246599075	0.791956	0.779576	1.06668	0.865984	0.748599	0.761512	0.827246	1.16763	1.01651	0.862968	0.99119	0.912478	0.881303	1.06446	1.17402	0.91266	0.99123	0.982452	1.14132	1.41326	0.908997	0.900448	1.06183	1.08118	0.967857	0.911454	0.774223	0.741358	1.31023	1.11113	1.04358	0.884399	0.956188	1.20824	1.04043	1.77563	0.837418	1.05701	0.671187	0.814496	1.01204	0.937728	1	0.818383	1.22436	1.11979
402	chr1	246599076	247213117	1.14793	0.974323	1.03295	0.887867	1.00323	1.22418	1.08931	1.07609	1.03649	1.13655	1.0819	0.938426	1.31006	1.04825	0.981086	0.799086	0.873386	1.16863	1.0772	1.19192	1.19043	1.10801	1.36101	1.13231	0.923324	1.16297	1.0106	0.890444	1.26445	0.880434	1.03683	1.06499	1.22935	1.15177	0.917159	1.39987	0.761977	0.99399	1.20502	0.764564	0.864334	1.08991	1.35446	1.41299	1.1809	0.906935
403	chr1	247213118	247831991	1.52122	0.80656	1.37849	1.06389	1.0744	0.74975	1.07374	1.05524	1.06797	0.612118	1.16992	1.20574	1.23094	0.974337	0.80232	1.24482	1.32326	1.09534	1.27687	1.15223	0.888301	0.977189	0.913632	0.902585	0.955165	1.09111	1.03317	0.843473	1.25862	1.40138	1.21665	1.02587	0.898236	0.788214	1.24301	1.04214	0.912877	1.06369	1.00916	1.21057	1.06678	1.03175	1.25779	1.22032	1.19317	1.1607
404	chr1	247831992	248517881	0.884209	1.05493	0.888833	0.882533	1.34947	1.42727	1.06858	0.921273	0.889359	0.92291	1.29977	0.926226	1.23293	1.03301	0.902651	1.21244	0.627049	0.834187	1.30048	0.706652	0.999628	0.998424	0.916031	1.06287	0.866019	0.64743	0.988297	1.28202	0.764522	1.0986	1.33372	1.15243	0.976402	0.789091	1.19386	0.494768	1.21623	1.17748	0.963776	1.17568	1.2109	1.20966	1.18459	0.968455	0.979761	0.941797
405	chr1	248517882	249250621	0.787435	0.892516	1.28758	1.25978	1.19191	0.962746	1.13067	1.08029	1.11927	1.17917	1.14035	1.21454	0.853085	1.05534	1.30263	0.956614	1.22955	1.1621	1.20601	0.781785	1.03192	0.885949	1.35485	1.72208	0.79025	0.967398	0.932585	0.921913	0.752084	1.20689	1.11414	0.942364	1.09601	0.955068	1.07485	1.08699	1.41605	1.45542	0.992608	1.30229	1.19631	1.20707	0.739256	0.865893	0.877625	1.3268
406	chr2	1	623315	0.971397	0.959658	0.70022	1.14125	1.19285	0.968069	0.948197	1.0603	1.00503	0.859422	1.02022	0.885772	0.924143	1.20008	1.07726	0.967237	1.15861	1.26537	1.13881	0.829662	1.14736	1.02396	1.20503	1.19989	0.81549	0.96158	0.932132	1.2318	0.861965	0.880783	1.18204	1.16744	0.874418	1.08763	1.15927	1.20251	0.857207	1.45071	1.0149	1.52944	1.19522	0.766632	0.889611	1.12198	0.990449	1.00075
407	chr2	623316	1291916	0.809613	1.01003	1.10153	0.748075	0.650613	0.746874	1.03795	1.11402	0.921153	0.814372	0.796399	0.903864	1.16723	0.820803	0.917622	0.557778	0.977503	0.811633	0.846013	0.935465	1.11739	1.01194	0.822736	0.876341	1.19773	0.753836	1.49117	0.859255	0.967253	0.954268	1.30488	0.93682	0.815625	0.741825	1.045	1.45194	1.1579	0.915729	1.04481	0.75392	0.846616	1.00664	0.824006	0.975294	0.676232	1.29993
408	chr2	1291917	1889431	1.02862	1.11484	0.917775	1.1674	0.906714	0.910168	0.941319	0.903581	1.16088	0.891859	0.968321	0.886683	1.21157	1.27797	1.06135	0.737358	0.773644	0.693693	1.26766	1.12802	1.12252	1.05597	1.2382	0.888664	0.689589	0.884589	1.23857	0.819309	0.74562	0.651671	1.12151	1.32757	0.958473	1.42246	1.02412	0.715726	1.01496	1.12722	1.29816	0.794168	0.94962	1.00899	0.820715	0.979984	1.17791	0.858601
409	chr2	1889432	2478691	0.846787	0.846643	1.26902	1.00319	1.47016	1.33939	0.985466	0.824364	1.07166	1.25777	0.799273	0.94778	1.03693	0.942112	1.01101	0.903876	0.903591	0.861161	0.828023	0.937709	0.880411	1.13317	1.04395	1.32368	0.793068	1.00196	1.37188	0.924786	0.835743	0.512994	1.03213	0.971039	0.868559	1.24392	0.755194	0.792947	1.18377	0.963023	0.747268	0.945576	1.14267	0.930531	0.794496	0.972236	0.977473	1.43057
410	chr2	2478692	3080026	1.22671	1.01009	1.17071	1.38526	1.15354	0.80001	0.92765	0.948867	1.01492	1.2666	0.981931	1.0901	1.07463	0.85728	0.692821	1.3943	0.92612	1.13656	1.08301	1.01119	0.883861	0.96411	1.05214	0.80888	0.990462	1.21997	1.11351	0.989588	0.525116	1.15193	0.797686	0.969116	1.06272	0.858903	0.946907	1.3481	0.846214	0.832628	1.51808	0.620774	0.879107	1.28855	0.714113	0.975258	1.42368	0.963224
411	chr2	3080027	3725057	1.07907	1.24354	1.69397	0.705552	1.26242	0.680911	0.991039	1.22949	1.22614	0.964048	1.0501	1.32187	1.05473	1.14261	1.36081	1.15671	1.03417	1.52701	0.929349	1.04176	1.15304	1.14151	0.693962	0.90498	0.825984	1.12439	1.10865	0.9748	0.691092	1.11554	0.800374	1.28722	0.871923	0.95045	0.686896	0.842967	0.83736	1.14473	0.914171	1.33149	1.16543	1.17567	1.1442	1.15019	1.142	0.799113
412	chr2	3725058	4332267	0.816646	1.02327	0.706355	1.21067	1.00234	1.08867	1.14738	0.782152	0.952185	0.76748	0.811644	0.643132	1.1489	1.05319	0.872074	0.591112	0.807663	0.75708	0.872865	1.32502	0.740714	0.997191	0.72395	1.14332	0.635853	0.939248	1.14422	1.25665	0.911292	1.27331	1.02799	1.29564	1.0239	0.859711	1.20337	0.707384	0.868685	1.0704	1.1483	1.07749	0.749291	0.863479	1.05943	0.90204	0.774282	0.955365
413	chr2	4332268	4937378	0.714641	1.00034	1.35375	0.844898	1.44125	0.76164	0.815578	0.989144	0.998142	1.10342	1.2379	1.12699	1.27543	0.779947	1.22972	0.782428	0.751551	0.927224	1.10354	0.78588	0.857092	0.990538	1.10471	0.912606	0.956544	1.17162	1.31828	1.26614	1.1795	1.35212	0.914124	1.02781	1.16939	0.752465	0.871957	1.04542	0.88476	1.14943	0.775948	0.91041	1.1926	0.875942	1.18295	0.852982	1.31505	1.15438
414	chr2	4937379	5660150	1.29009	1.06447	1.01997	0.816085	0.89006	1.18726	0.795799	0.896628	1.0656	1.32671	0.724459	0.832176	1.20217	0.834027	1.11008	0.741645	0.871894	0.974568	1.18178	1.06096	0.94332	1.02976	1.04114	1.09518	1.0655	0.7809	0.943411	1.30257	0.7807	0.677033	1.44746	1.15483	0.694732	0.887884	1.2492	1.34509	0.931228	1.07008	0.956577	1.11456	1.08951	1.00693	1.06559	1.07204	1.26214	1.02609
415	chr2	5660151	6249081	0.957276	0.865361	1.05527	1.31305	1.04026	0.933623	1.02221	1.14729	1.04772	1.31001	1.07917	0.983158	1.22834	1.03001	1.36594	1.31229	0.901745	1.12126	1.07255	1.11307	1.17487	1.0699	0.93097	1.37561	1.36831	1.17039	1.13222	0.902486	1.00582	1.00054	0.984219	1.21986	1.10381	1.07395	0.942575	0.857283	1.17798	0.930216	1.2612	1.22569	0.852626	1.08544	0.593885	1.02061	1.08607	0.771887
416	chr2	6249082	6846145	0.918341	1.02788	0.74503	1.26154	0.903014	0.865377	0.860849	0.921675	1.08391	1.11382	0.800533	0.759873	0.963997	0.967636	1.02117	1.35667	1.50207	1.48467	1.08723	1.21739	1.11685	0.99044	0.987297	0.726931	1.16224	0.837487	1.06286	1.30242	1.1248	1.21931	1.16333	1.02027	1.28731	1.02979	1.42949	0.977752	1.02183	1.21073	0.93946	1.32661	0.92806	1.0836	1.0985	1.13798	0.886378	1.15167
417	chr2	6846146	7403442	1.21359	0.950269	0.757796	1.55436	0.869811	1.1651	1.26038	1.18771	1.07908	0.970758	1.12189	0.93131	1.04325	0.917391	0.664578	1.56639	0.833228	1.4321	0.993153	1.31476	1.23146	1.02043	1.12305	1.22325	0.941056	1.40961	1.03174	1.11943	1.13752	1.59547	1.19949	1.05143	1.03864	1.57288	0.722291	1.32212	1.10997	0.876261	1.022	0.89831	0.77391	0.984487	0.997257	1.04081	1.27157	1.45836
418	chr2	7403443	7971841	0.943482	1.01351	0.815988	0.788302	0.979806	1.09383	0.792621	1.04883	0.943623	0.864697	1.05917	0.634338	1.10969	1.00037	1.00071	1.09906	0.615705	1.05735	1.33243	0.954414	0.778572	1.16364	1.08933	0.803399	0.85793	1.34635	1.00185	0.641908	0.822903	0.651258	1.13125	0.983096	1.07934	1.23657	1.32025	1.20888	1.04799	1.354	1.03638	1.33204	0.804076	1.1368	0.922273	0.975707	1.27373	0.712011
419	chr2	7971842	8512706	1.16427	1.07682	0.994276	0.990294	0.847768	1.10747	1.00735	1.27338	1.10492	1.0845	0.635005	0.720165	1.04172	0.701816	1.06963	1.1377	1.17943	0.906198	1.03611	0.799473	0.789891	0.959054	1.21097	0.893898	1.08013	0.95315	1.16031	1.04014	1.18098	0.536659	1.04232	1.18939	1.09576	0.889879	1.27157	1.05241	1.20064	1.1245	1.18945	1.19597	1.16471	1.40046	1.39093	1.2359	1.15138	0.942743
420	chr2	8512707	9052869	0.894981	0.787655	0.87586	1.02896	0.932347	0.91753	0.852553	1.07131	0.953246	1.33495	1.13169	1.08716	0.747877	0.947327	0.754019	1.15454	1.27743	0.77558	0.865946	0.877838	1.31692	0.836523	1.07546	1.38565	1.11414	1.00026	1.15596	1.10293	1.06651	0.958356	1.27149	1.05699	0.913303	0.881342	0.699505	1.02927	0.992665	0.861154	1.0573	0.793107	0.859195	1.04348	0.96117	0.948496	1.02308	0.936376
421	chr2	9052870	9575839	1.38293	0.995897	0.478087	1.37641	0.473452	0.907384	1.04489	1.01819	0.91026	1.27551	1.48615	0.953265	1.06831	1.37314	1.06098	1.19093	0.771804	1.09021	0.961983	1.06102	0.544072	1.04346	0.988575	0.873725	0.676724	0.962014	0.913023	1.00299	1.49484	0.899398	1.28561	1.12296	0.895064	1.08559	0.756849	0.697903	0.96307	1.2326	0.861376	0.649175	0.822636	0.902507	1.13479	0.828213	0.658816	0.668321
422	chr2	9575840	10110255	1.15496	0.724538	0.721632	1.09581	1.04884	1.17951	1.03945	0.856695	0.968398	1.01598	0.753338	1.00021	1.08484	0.883677	1.12529	1.2775	0.651649	0.925218	0.999876	0.954716	0.945748	1.08769	1.19448	1.25847	0.841139	0.795641	1.42535	0.947025	0.844683	1.12243	0.619149	1.21017	1.41014	1.0649	0.942531	0.572879	1.13727	0.79601	1.06047	1.08246	0.846273	1.21031	0.992608	0.90786	1.68056	0.821627
423	chr2	10110256	10655572	1.01354	0.973213	0.841699	0.573842	0.968432	1.17873	1.19001	0.991173	0.998398	0.678301	0.692594	0.874408	0.867221	1.1369	0.857993	0.947285	1.0317	1.03943	0.74249	1.02388	0.859774	0.987658	0.870192	0.752469	0.968557	0.959709	1.178	1.26576	1.19049	0.579841	1.0105	1.0595	0.988021	1.25883	1.16613	0.759536	1.06692	0.949323	0.680967	0.960644	0.841835	1.03768	0.761722	0.93192	1.10443	0.981308
424	chr2	10655573	11205796	0.476352	0.692662	0.84686	0.914694	1.10081	0.638933	1.04125	1.26666	1.03887	1.20513	0.648541	1.05587	0.616923	1.17932	0.944012	1.13166	1.03336	0.96695	0.707405	0.933659	0.740886	0.956332	1.13982	0.791728	1.13995	0.755884	1.00174	1.14661	0.989981	1.16623	1.08208	1.07337	0.81413	0.999721	1.06575	0.913041	0.829979	0.965352	1.21736	0.76407	0.954691	1.24045	1.15121	0.860524	1.08652	1.19899
425	chr2	11205797	11771021	0.779874	1.28647	0.77005	0.725813	0.868316	0.96988	1.33243	1.17481	0.946593	1.68219	0.969821	1.10564	1.37061	1.05029	0.938621	1.13329	1.09617	1.13514	0.979127	1.17016	1.11454	1.08206	1.00673	0.973043	1.08865	0.918062	1.03247	0.996521	0.762839	0.911786	0.970424	0.93958	0.761048	1.27735	1.16391	1.35824	0.860889	1.104	0.947633	0.966653	1.36755	1.29695	0.904032	1.00995	1.04595	1.35434
426	chr2	11771022	12346639	0.913277	1.2549	0.534092	1.02977	0.747247	0.985532	1.13724	0.945363	1.07321	0.978394	1.21032	1.0196	1.13502	1.31068	0.936835	1.12321	1.47466	0.846898	1.00568	1.12607	1.28337	1.02704	1.07271	0.943909	0.96833	0.911303	0.884574	1.40378	0.995598	1.1407	1.13964	0.914814	1.33301	0.964891	0.75448	1.01779	0.866595	0.969807	0.86934	0.768813	0.977294	0.879312	1.13246	0.992623	0.613228	1.02309
427	chr2	12346640	12887469	1.20002	0.922213	0.733228	0.923062	1.06754	0.620045	0.970646	0.90071	0.935717	0.926312	1.10308	0.843144	1.12242	1.00817	0.863786	0.698637	0.986402	0.94167	1.1793	1.16116	0.96946	1.02918	0.765826	0.897576	1.04574	0.793984	1.19648	0.721105	1.0574	0.832321	0.889318	0.860877	1.0434	0.811965	1.11807	1.04016	1.15626	0.88739	0.909429	0.991178	1.05077	1.06563	1.16777	0.880015	0.96951	1.10933
428	chr2	12887470	13492121	1.2988	0.943363	1.0198	1.2218	1.14509	0.942928	1.12794	1.04284	0.950948	0.895603	0.979526	0.659401	1.12535	0.976858	0.751068	0.73164	0.942777	1.03278	0.841795	1.28649	1.23572	1.05759	1.16022	1.1641	1.20599	0.950811	1.23055	1.22473	1.34588	0.853931	1.29781	1.06139	0.858644	0.969404	1.09876	1.10857	0.941476	1.50792	0.626974	0.867261	1.04519	1.05494	1.03082	0.976302	1.04798	1.02684
429	chr2	13492122	14127845	0.819535	0.629697	0.729123	1.11151	1.60012	1.01109	0.841137	1.04577	1.19131	1.42743	0.82749	1.05656	0.957936	1.33257	1.04848	0.90994	1.09996	0.899162	1.21427	1.548	0.67884	1.00656	0.740932	1.23814	1.1161	0.978759	1.16131	0.750615	0.890852	1.03512	1.46323	1.18669	1.21844	1.37564	1.05737	0.914547	1.1323	1.22584	1.17139	0.967741	0.907023	1.00896	0.697741	1.14464	0.915117	0.641283
430	chr2	14127846	14753477	0.934062	0.781612	0.693348	0.975015	1.34863	0.891809	1.2557	0.970962	1.12155	1.22437	0.746668	0.822749	0.950413	1.22283	1.16609	1.06176	0.888054	0.827088	0.844107	1.34767	1.21622	1.12822	1.02286	0.847188	0.986957	0.808241	1.39306	1.00234	1.10255	1.15011	1.41607	0.882774	1.48916	0.845382	0.990032	1.09956	1.12011	0.966066	0.930255	0.807532	1.70062	1.06594	0.800753	0.883497	1.12025	1.24377
431	chr2	14753478	15325175	1.21304	1.07855	0.751861	0.836564	1.04415	0.95824	1.13632	1.21541	1.07645	0.842248	0.815068	0.822752	1.17291	1.25622	0.979858	1.26897	0.951833	1.19206	1.2938	1.02606	1.19367	1.08236	1.05793	0.883301	0.805907	1.12934	1.1665	0.831877	0.961918	1.01346	0.958637	1.1481	1.09102	0.967293	1.12799	0.798467	1.20835	0.966571	0.908298	0.999994	0.907683	1.27869	0.77679	1.09231	1.40069	0.942854
432	chr2	15325176	15931324	0.892963	1.01091	0.978815	1.34698	0.954228	1.26247	0.972526	0.916168	0.99617	1.29461	0.847976	1.52686	0.938977	1.00659	1.02948	0.965126	0.904033	1.00308	1.19716	1.38361	0.742445	1.1543	1.14733	1.05858	0.919168	1.05674	1.19794	1.02449	1.11217	0.593674	1.22247	1.36047	1.03824	1.13351	1.15435	0.723384	1.06918	0.97619	0.973964	1.10609	0.742966	1.09798	1.44263	1.05855	1.50067	1.18823
433	chr2	15931325	16556105	1.07704	1.32274	1.01045	1.19304	1.09105	0.77472	0.983089	1.27014	1.01452	0.946955	1.01759	0.91753	1.30329	0.997827	0.987071	0.745447	0.743874	0.838216	0.890787	0.74027	1.10427	1.02452	0.966623	1.03709	0.897316	1.2332	1.30327	0.85419	1.01188	1.04703	0.92479	1.2392	0.695514	1.17559	0.96618	0.848674	1.18806	1.07088	0.908567	0.909074	1.08327	0.90979	1.1619	0.93527	1.26299	0.88272
434	chr2	16556106	17136767	1.25827	1.18414	0.843871	1.68111	1.1643	1.2712	1.03805	1.04664	1.02582	1.152	1.07535	1.20589	1.09144	0.875282	0.867851	1.0337	0.905463	0.858667	1.20316	1.2176	1.23967	1.08227	1.16124	1.32162	0.93154	1.18119	1.04683	1.33393	1.26987	1.29948	0.968784	1.42266	1.20281	0.857852	1.09174	1.23877	1.01972	1.16886	0.934981	1.25719	0.681046	1.23495	0.91665	1.43111	1.11923	0.977816
435	chr2	17136768	17730064	1.1871	1.37459	0.854388	1.00281	1.04105	1.25581	1.27801	1.09148	1.32667	1.48459	0.880065	0.941552	1.15068	1.03768	1.13905	1.36906	0.921994	0.959675	1.07858	1.15255	1.16755	1.01861	1.07868	0.868755	1.48165	1.02759	0.997474	1.34085	1.25352	0.898821	0.758914	0.917468	1.27266	0.969234	0.977631	0.980345	1.05334	1.26625	0.942335	1.50644	0.864183	0.930293	1.13419	0.919649	0.849465	1.0011
436	chr2	17730065	18306218	0.87693	1.15766	0.934465	0.987838	0.764739	1.13195	1.11535	1.0969	1.11534	0.977095	0.760221	0.801014	1.31961	0.852052	0.765937	1.26277	1.17799	0.753497	1.01129	0.791147	0.874596	1.03808	0.905648	0.830343	0.842863	0.83176	1.21391	0.892203	1.20752	1.10935	1.36662	1.1674	1.28161	1.25508	1.02703	1.02322	1.14068	1.43872	1.0236	1.30033	0.994651	1.07925	0.884198	0.749127	0.813831	1.20297
437	chr2	18306219	18852855	0.928827	0.992466	1.09684	0.907799	1.13631	1.0839	0.956419	0.958982	0.975783	0.857069	0.567904	0.779417	1.06149	0.958335	0.740324	1.0602	0.977643	0.785857	0.697998	1.3398	1.07452	1.09703	0.938898	1.10869	0.847536	0.884011	0.992158	1.0401	1.00394	1.14494	0.76379	1.23417	1.18605	0.882058	1.43654	0.882979	1.03874	1.10083	0.792184	1.12043	1.05848	1.19145	0.858619	0.879071	0.817358	1.20242
438	chr2	18852856	19411929	0.77939	0.735437	1.16836	1.14172	0.97792	1.08825	1.0032	0.924047	1.00431	0.688009	1.08998	1.28573	0.747033	1.16532	1.05709	1.3649	0.938991	0.877813	0.878224	1.22759	0.90327	1.03976	1.05523	1.19094	0.809785	0.959784	1.03549	1.39768	0.860373	1.18098	1.28385	0.651073	0.673599	1.06734	1.05997	1.17347	1.56812	0.712643	0.886898	1.04116	1.33077	0.948154	1.13849	1.0622	0.775	1.09047
439	chr2	19411930	19956961	0.870246	1.22944	0.813974	1.39168	1.01288	0.861633	1.12028	1.11381	0.994995	0.823929	0.767389	1.23444	0.938143	1.11862	0.869163	0.885602	0.545781	0.680303	0.709939	0.845905	1.17466	1.02273	0.767401	1.02183	0.757965	1.08018	1.20579	0.947724	1.00576	1.00067	1.16289	1.16033	1.17239	0.738312	0.795238	1.04774	1.07095	0.969784	0.817262	0.903926	0.791428	0.971041	1.44572	0.629344	1.08603	1.05824
440	chr2	19956962	20492039	0.954413	1.19066	0.986974	0.851075	0.922774	0.758865	0.975251	0.871149	0.837505	1.17778	1.10901	0.839078	0.898833	0.817422	0.934145	1.17584	1.06164	0.826031	1.10143	0.751685	0.747316	0.891468	1.01123	0.868399	1.09701	0.96612	0.97209	0.610829	0.970436	1.25641	0.899348	1.1046	1.02374	0.948407	0.908163	1.26603	1.01366	1.50791	1.29214	1.1526	1.01339	1.2601	1.14186	0.822866	0.892435	1.09706
441	chr2	20492040	21029475	0.85213	0.992458	0.977062	0.813203	1.00641	1.01499	0.906423	0.797142	0.868428	1.15183	1.07316	0.695228	1.08662	0.815157	0.851013	1.12506	0.934134	0.87632	0.903653	1.42829	0.903657	0.798484	1.01409	1.06607	1.02675	1.06182	0.992552	1.20908	0.680624	0.750716	0.9602	0.895552	0.668479	0.827423	0.97088	0.835144	1.09217	1.13692	0.941235	1.24975	1.47242	0.850449	0.976973	1.11868	0.598742	1.15813
442	chr2	21029476	21646752	0.648733	1.24837	0.592372	0.631087	1.09716	1.05545	0.67587	1.03277	0.951185	1.24425	0.57943	1.24717	0.816982	0.994653	1.09134	1.03299	0.804755	1.19127	0.866125	1.13936	1.21415	0.992626	0.949359	1.08116	0.928693	0.863522	0.925316	1.25693	0.965244	1.3332	0.943271	1.02677	1.12554	1.08554	1.00193	1.25315	1.14991	0.857589	0.939944	0.919311	1.12747	1.21745	1.02961	0.948175	0.590585	0.86929
443	chr2	21646753	22236360	0.696746	1.10157	1.11273	1.07998	1.1554	0.914255	0.921968	0.832922	0.913866	0.816026	0.539458	0.82318	1.20449	0.749861	0.941085	1.30399	1.00781	0.865081	0.951469	1.00571	0.787357	1.26795	0.976244	0.744773	1.0349	0.908163	0.994788	0.966656	1.0482	1.45551	1.02848	1.07287	0.846981	0.925656	1.08232	0.797466	0.998599	1.11418	0.904683	0.837884	1.30295	1.07927	0.966238	1.05452	0.793492	1.30237
444	chr2	22236361	22831152	0.91105	0.903323	1.098	0.985196	1.1918	1.13144	0.736738	1.07463	0.759753	0.966392	1.21273	0.80235	1.07891	0.887394	1.11383	0.759905	0.753544	0.845569	1.06585	1.2282	1.42207	1.10424	1.14834	1.30721	0.717857	0.909505	1.01058	0.673706	0.744472	1.0814	1.03521	1.07982	0.951543	1.16919	1.39554	1.30289	0.987721	0.840811	1.0034	1.54975	1.00135	1.19134	1.06663	0.80694	0.981894	1.09017
445	chr2	22831153	23425818	0.822354	1.0436	1.02468	0.860848	0.836272	0.80507	0.938007	0.952341	1.04306	1.15482	1.30132	1.10809	1.12343	1.38225	1.07822	1.18948	1.39098	0.777513	1.09161	1.20737	1.35858	1.16564	1.27571	0.924722	1.02436	0.829488	1.10062	0.920551	1.05609	1.1888	1.01074	1.10839	0.85347	1.188	1.24731	0.98385	1.23091	1.36208	1.35387	1.05557	0.888961	1.03858	0.905777	0.808791	0.857414	1.22194
446	chr2	23425819	23970592	0.912463	1.17585	1.06272	1.00855	1.11067	0.913244	1.12467	1.11951	1.14294	0.772804	1.31723	0.961543	1.26874	0.742821	0.959804	0.819611	1.11624	1.03478	1.32114	1.17746	1.35709	1.1758	1.14301	1.14677	1.00204	1.01655	1.05851	1.26711	1.32981	1.13086	0.815885	1.00614	0.941784	0.658303	1.07277	0.751312	1.26191	1.07835	1.02719	0.860232	0.740874	1.38475	1.31972	1.02139	1.49006	1.23613
447	chr2	23970593	24554221	0.948453	0.84563	0.920297	0.876317	0.903528	1.2475	1.03592	1.29746	0.940143	1.00682	0.966554	0.886288	0.871072	1.10485	1.34746	0.772388	1.0688	1.2869	1.23059	1.40554	1.33649	0.911712	1.02932	0.998222	1.38049	1.06393	1.1473	1.13724	0.943932	0.88555	1.24126	0.82561	0.831607	1.17457	0.986512	0.955151	1.02919	1.19005	1.17145	0.951958	1.0154	0.97252	1.06204	0.899591	0.966968	1.28254
448	chr2	24554222	25123168	0.984758	0.95784	0.761996	1.2428	0.688821	1.17488	0.893594	1.08514	1.03413	0.837029	0.658664	0.785976	1.15952	0.983215	1.12582	1.33401	1.11248	0.873175	1.05516	0.960727	1.23316	1.10586	1.14305	0.93094	1.02904	0.909409	0.893484	1.30041	0.82641	0.933299	1.11755	1.1988	1.02068	1.12967	1.27323	0.995849	1.03589	1.04749	0.999226	1.5137	0.946573	1.37847	0.988144	0.900169	0.75169	0.803893
449	chr2	25123169	25684596	0.792494	0.926996	0.899235	1.27371	0.913491	0.970163	0.970606	1.12986	1.18331	1.17833	0.929513	1.06749	0.964247	0.651236	0.987834	0.931328	1.06952	0.915694	0.935566	0.83529	0.891919	1.2654	1.03472	1.19799	0.818883	0.718653	0.967504	0.787906	0.904826	1.21193	1.04106	1.21638	0.835498	1.07927	0.978557	1.17795	0.925013	0.997982	1.31822	1.1324	0.922821	0.507612	0.769429	0.887893	0.807588	1.02156
450	chr2	25684597	26258371	0.908501	0.781329	1.46099	1.14597	1.08746	1.17432	0.871683	0.865346	0.901897	0.949287	1.11578	0.848639	1.29387	0.919753	0.945277	1.65949	0.798506	0.67951	0.891815	1.27715	0.96445	1.14826	1.16651	1.04451	1.31961	0.788791	1.071	1.06144	0.860979	1.33861	1.08107	0.826582	0.96032	1.34262	1.24272	1.53577	0.809605	0.772384	0.880601	1.11979	0.905449	0.904663	1.28796	1.06223	1.16986	0.901488
451	chr2	26258372	26805770	0.888578	0.833703	1.44084	1.4525	1.11801	1.011	1.04475	0.917485	0.942979	0.608166	0.986755	0.861351	0.988986	1.08005	0.706971	0.681991	0.782203	0.684976	0.880841	1.58269	1.4735	1.03065	1.29764	1.00593	1.01992	1.02227	0.953601	0.873203	1.00154	0.679167	1.04137	0.587755	0.916501	0.85318	0.864639	0.923644	0.855486	1.11923	0.949261	1.0944	1.08757	1.04525	1.21324	0.61756	0.892573	1.01779
452	chr2	26805771	27385234	1.02412	1.1712	0.599869	1.24204	1.0451	0.857099	1.27645	1.08041	0.985846	1.22046	0.528309	1.04665	0.974673	1.03434	0.908424	1.07796	1.25228	0.65308	0.66157	1.03738	0.986239	1.04863	1.07117	1.07296	0.94663	0.828564	0.983035	1.10344	1.03034	0.861321	0.961804	1.29042	0.992169	1.29295	1.12106	1.0111	1.28212	1.08248	0.987949	0.906898	0.818205	1.03071	0.59815	0.738995	0.969378	0.867143
453	chr2	27385235	27959209	0.849672	1.1602	1.42132	0.587201	0.92589	0.917129	0.921976	1.06992	1.00041	1.28838	0.871242	0.935037	0.961467	0.973176	0.953256	1.44018	0.384871	0.775242	1.00639	1.06766	0.999283	0.823763	0.819366	1.01516	0.797808	0.898246	0.757561	0.758969	0.843739	1.04112	0.931905	1.14588	1.06581	0.864556	0.801429	0.910329	1.20656	1.2278	1.13224	0.850291	0.799134	0.879531	1.14591	1.06075	1.09823	0.669673
454	chr2	27959210	28525664	0.90747	0.728942	1.34826	0.735444	0.964622	1.07668	0.929913	1.00899	0.909646	0.940708	1.27478	1.03527	1.04546	1.18927	0.873965	1.10443	0.791561	0.535617	0.768298	1.13709	1.26524	0.862967	1.19165	0.684399	1.29986	1.06739	1.05859	0.909357	0.978372	0.715628	0.993943	0.846648	0.960401	0.531989	1.53908	1.05908	1.04463	1.1815	0.921873	1.01225	0.846126	0.952367	0.997409	0.529622	1.06522	1.35205
455	chr2	28525665	29051652	0.982237	0.721693	1.13689	1.18189	1.04303	0.967668	0.984866	0.82156	0.886285	1.12413	0.74092	0.941444	0.955248	0.837673	0.924289	0.826694	0.800998	0.784201	0.872391	1.0787	0.913477	1.09057	0.86084	0.84815	0.691105	1.06785	0.775108	1.10509	0.97085	1.29453	1.12847	0.979395	0.916275	1.39399	1.10443	1.12113	0.916696	1.00674	1.25466	0.753164	1.16665	0.981694	0.772359	1.08918	1.27013	0.698656
456	chr2	29051653	29590892	0.905418	0.916212	0.981207	0.745972	0.625905	1.16948	0.862095	0.941469	0.9708	1.28466	1.237	0.669533	1.08991	0.899079	0.902503	0.76433	1.45237	0.812463	0.763962	1.05952	1.19335	0.975652	1.145	0.873024	0.992204	1.13044	1.01031	0.629487	0.97215	1.09393	0.982643	1.0006	1.01387	1.24988	0.967998	1.21608	0.997989	1.1808	0.936327	1.36849	1.27088	0.847799	0.682831	0.85637	0.715185	0.933733
457	chr2	29590893	30107675	0.864878	1.3424	1.39911	1.27957	1.08189	0.731367	0.846595	1.05339	0.884123	0.608988	0.658712	0.608858	1.22013	0.967765	0.763202	0.786997	0.861569	1.29812	0.863042	1.36091	1.04475	0.989833	0.855987	0.91245	1.06088	0.991751	0.943318	1.1365	1.1182	1.03487	0.891426	0.853766	0.966903	0.889179	1.09219	0.730255	1.06528	1.01444	0.774968	0.706346	1.05458	0.96142	1.04327	1.13374	0.891087	1.01381
458	chr2	30107676	30639392	1.14379	0.993217	0.941868	0.730528	1.2636	1.26203	0.854104	1.15289	0.888451	1.06611	0.927555	1.06872	1.14422	1.10681	1.10612	0.899109	1.36604	0.879903	0.877309	0.741381	0.468788	0.878383	1.26996	1.09526	0.881075	0.972012	1.00951	0.877591	1.29127	1.04795	1.05624	0.518435	0.796362	1.10004	0.931806	1.17426	0.926692	1.04568	1.01142	1.00657	1.43883	0.815064	1.1761	1.09968	0.814727	0.815154
459	chr2	30639393	31172288	0.932995	0.786433	0.756378	0.918364	1.48077	1.13098	1.22825	0.843528	1.05386	1.46806	1.32311	0.919196	1.17482	1.23924	0.937565	1.02268	1.38028	0.981605	0.823659	0.934072	0.693738	0.976839	1.0944	1.19488	1.03989	1.13584	0.916656	0.799872	0.884948	1.02209	1.04716	0.725627	1.10603	0.817248	1.701	1.00967	1.13116	1.15776	0.993546	1.12125	1.24124	1.20982	1.32033	0.863568	0.95605	1.03005
460	chr2	31172289	31689205	0.889337	0.942959	1.01711	0.898469	0.548326	1.11715	0.959443	0.958321	0.808756	1.12946	0.799995	0.788704	0.80207	0.951388	0.879407	1.03005	1.10561	0.800859	0.86582	0.929278	1.12548	1.12461	1.29305	0.671205	0.948431	1.02917	1.03606	1.03596	0.821785	1.08992	1.02983	0.793095	0.979838	0.770527	0.864594	1.38905	0.761174	1.1263	0.865547	1.02991	0.838236	0.86661	0.661405	1.05121	1.19879	1.16338
461	chr2	31689206	32316549	1.21015	1.26852	1.19779	0.749698	0.814215	1.25777	1.0873	1.20327	1.04454	1.13625	0.907939	1.12563	0.90466	1.07801	1.28539	1.0446	1.00604	0.960837	1.3843	1.07174	0.697238	1.05118	1.4025	0.997193	0.9563	0.836666	1.22906	1.03577	1.16767	1.04199	0.71988	0.973203	0.893995	1.09068	1.55883	0.826396	1.21585	1.13129	0.975119	0.874528	0.842911	1.17781	0.903149	0.9612	0.787344	0.983454
462	chr2	32316550	32948305	1.1427	1.0245	1.57697	0.9152	1.24862	0.784208	1.04771	0.83039	1.07983	1.05826	0.691359	1.0479	0.707972	0.802751	1.09234	1.06297	1.05943	0.9015	0.855611	1.17703	1.11691	1.05771	0.950687	1.1042	1.14122	0.784883	0.974522	0.690221	1.10416	0.63203	1.01949	1.04206	0.611201	0.773188	1.32348	0.434858	0.887504	0.864416	0.688107	1.01072	0.79081	1.09925	0.32061	0.997754	0.825551	1.15691
463	chr2	32948306	33506929	1.02212	0.973816	1.05575	1.16977	1.32366	1.63249	1.01359	1.24543	1.03574	0.960623	1.51741	1.01556	0.754975	0.904496	0.988932	0.864735	1.26691	0.82003	1.38758	1.09686	1.08878	1.0235	1.12377	1.16036	0.822574	1.00755	0.950039	1.0069	0.90535	1.00311	1.15768	1.06091	1.01648	1.26651	1.03872	0.983501	1.33512	0.901442	0.94627	0.934366	1.49212	0.996014	0.873903	0.814503	1.18045	1.27454
464	chr2	33506930	34057170	0.870796	1.11231	1.29464	0.778067	0.699395	1.16209	1.01288	1.046	0.990137	0.925439	0.496392	0.941651	1.16428	0.907097	1.25473	0.745418	0.623883	1.01077	0.843049	1.08726	0.815011	1.14583	0.706372	0.642969	1.00675	1.19383	1.02794	1.1152	0.809505	1.047	1.30825	0.805476	1.20555	1.13884	1.20037	1.17316	0.88764	1.17005	0.71728	0.782205	1.05232	1.38363	1.05626	0.953251	1.00393	1.0185
465	chr2	34057171	34655072	0.85576	0.988751	0.96902	0.963578	0.88602	1.04719	1.12856	1.10924	0.750767	1.24401	0.833022	1.01681	0.821598	0.940317	1.18759	0.798674	0.972498	1.00527	0.702108	0.931081	1.01741	1.06878	1.2991	1.27503	0.966976	1.1642	0.973524	0.741868	0.800374	1.14874	0.968765	0.9057	0.7248	0.891793	0.887528	0.857637	1.26341	0.873763	0.443302	0.655502	1.40671	0.935642	0.824306	0.707358	1.00839	1.04119
466	chr2	34655073	35293667	1.08535	0.99829	0.729121	0.979178	1.08579	1.06162	0.922203	1.09393	0.938152	0.929992	0.852561	1.22855	1.0821	1.11352	1.39253	1.07845	0.953289	0.781861	1.10389	1.14927	0.930286	1.10177	1.04966	1.19688	1.55378	0.872945	1.08698	1.11381	1.24719	1.47428	1.04515	1.15545	0.919584	0.905034	0.876093	1.13701	0.873101	1.12535	1.02496	1.02953	1.28234	1.16125	1.18876	0.876368	1.11845	1.08356
467	chr2	35293668	35934724	0.930134	1.11837	1.35312	0.785717	0.949016	1.25193	0.809983	1.01489	0.970512	1.59035	1.12537	0.7391	1.19807	1.11881	0.982679	0.93575	0.804028	0.738446	1.2512	0.996723	1.1273	0.996706	1.2626	0.871602	1.49183	1.19359	1.06536	0.833104	1.06228	1.06065	1.04689	1.38592	1.00949	1.23266	1.09756	1.06149	0.972516	0.993247	0.849799	1.13262	0.918236	1.20943	0.885902	1.05169	1.13229	1.06043
468	chr2	35934725	36560079	1.1081	1.07218	0.819738	1.01974	1.03956	0.751417	1.12435	1.05562	1.0056	1.05528	1.09229	1.06354	1.11875	1.00881	1.12497	0.769607	1.29445	0.963803	0.956416	1.04705	0.921804	1.02768	0.999002	1.14974	0.897727	1.13656	1.12577	0.921925	0.908433	1.2543	1.08614	1.00482	1.29053	1.78454	0.999985	1.18219	1.18785	1.25078	1.07189	0.86095	1.25318	0.910582	0.998699	1.02092	0.887773	0.942657
469	chr2	36560080	37092746	1.15206	1.04301	1.12231	1.2201	1.15388	1.22005	1.08335	1.17922	1.15192	0.990923	0.82781	1.2138	0.948071	0.976267	1.08243	1.00061	1.159	0.851458	1.21497	0.953845	1.11039	1.12952	1.14447	0.89949	0.819258	1.18882	1.13459	1.11012	1.14252	0.745083	1.02481	1.30335	1.37449	0.954428	0.873752	1.25205	0.933734	1.16717	0.927203	0.771648	1.00638	1.16922	1.12126	0.763188	1.00937	1.41883
470	chr2	37092747	37650850	0.962735	0.870687	1.45255	0.908129	0.950136	0.870728	1.20182	1.22295	0.931237	1.11816	0.644239	0.872787	0.938165	0.873572	1.09023	1.19319	0.890444	0.976338	0.782025	1.36634	1.03469	0.992275	1.16669	0.855821	0.853555	0.854357	0.916549	1.39797	0.784425	1.24384	1.08134	1.17802	1.30042	1.32465	1.02976	1.0486	1.36385	1.22762	0.742829	0.700726	1.26889	0.891208	1.21749	0.792046	0.775293	1.36242
471	chr2	37650851	38166331	0.96386	1.37248	0.867024	0.987613	0.937256	1.00817	1.047	0.884205	1.03606	1.03945	0.885804	1.12082	0.902762	1.07974	0.743219	1.20361	0.627482	1.01786	0.956834	1.01288	1.03682	1.01259	1.13951	1.20463	0.947797	0.927807	1.08682	0.966413	0.848008	1.00557	0.791783	1.02639	1.20961	0.816664	1.06093	1.05033	0.799351	1.08291	0.826468	1.26449	1.2616	1.30722	1.23606	0.825148	1.39106	0.988459
472	chr2	38166332	38741349	0.91042	0.919953	0.855682	1.05706	0.969908	0.83145	1.09289	0.962329	0.96171	0.778261	0.801696	0.834648	0.956472	1.24108	0.951857	0.910783	1.0255	0.986583	0.994409	1.17165	0.833069	0.992432	0.963589	1.09471	1.02857	0.938674	0.955952	0.918633	0.788705	1.25632	0.903771	1.03	0.920277	1.19609	0.934777	1.33573	1.00949	1.02375	1.07237	1.07317	1.06258	0.799325	0.957868	1.18098	0.776781	1.46237
473	chr2	38741350	39317701	0.704488	1.34422	1.02395	1.14611	0.896753	0.598835	0.720406	1.13109	0.865497	1.07147	0.856834	0.661123	0.841007	1.09637	0.988786	1.36447	0.680619	1.00607	1.00001	0.971257	0.706054	1.01121	1.09732	1.15663	0.941799	0.885454	0.913213	1.35239	1.04184	0.963574	0.656566	0.770142	0.795598	1.40045	0.943084	0.52369	0.992441	0.843335	0.991743	0.875127	0.874562	0.984792	1.17925	1.03067	1.08827	0.998986
474	chr2	39317702	39885826	1.23897	1.42376	1.37638	0.929198	1.06217	1.10234	1.21267	1.21604	0.951908	1.03258	0.917674	1.01872	0.865795	1.00149	0.83386	1.23107	0.932541	0.943352	0.99136	0.895026	0.582345	1.26646	0.788627	0.889056	0.816116	1.19519	0.634326	0.772388	0.680884	1.07982	0.817771	1.12684	0.944141	0.90592	0.692931	1.07062	1.00456	0.800317	1.14004	1.07282	0.981566	1.12659	1.27802	1.06654	0.74082	0.747794
475	chr2	39885827	40424414	0.666916	1.03894	1.12948	1.19256	0.879568	0.836161	1.10504	0.987454	0.90187	1.00887	0.519853	0.755093	0.870089	1.01163	0.775053	1.22214	0.947528	0.563609	1.20327	0.909911	0.698457	0.924674	0.97333	0.693241	0.761433	0.961428	0.908585	1.16211	0.923938	0.80321	0.967858	1.07982	0.997771	1.16964	0.919789	1.20481	0.893255	0.780768	0.910192	0.938089	0.698129	1.09678	0.858496	0.842768	1.08019	0.645154
476	chr2	40424415	40985600	0.708924	0.802482	0.890041	0.929592	0.833797	0.683714	1.12724	0.996192	1.0778	1.41321	0.83037	0.911883	0.884068	1.0011	0.687707	1.07598	0.934898	0.960307	1.19643	0.915917	0.873591	0.928028	0.695979	0.784776	0.942466	1.1381	0.886203	0.511601	1.04585	1.00404	0.856471	1.25738	0.810203	1.30855	0.756784	1.1396	0.971	1.16644	0.902909	1.26817	1.04023	0.705687	0.983762	0.697452	0.684066	1.02397
477	chr2	40985601	41577568	1.0218	0.853055	0.942785	1.04091	0.922031	1.08476	1.10406	0.921788	1.04678	1.27638	1.07835	1.26255	0.983549	0.867352	1.19999	0.916388	1.231	0.867086	1.12857	1.04904	1.31361	0.972615	1.03649	1.18642	0.656357	0.709261	0.994731	0.407958	0.854674	1.31158	1.21229	1.161	0.82906	1.07589	0.813121	0.822314	0.871331	1.30169	1.07353	1.06125	1.42561	0.628279	1.24508	0.95244	0.810731	1.1959
478	chr2	41577569	42142274	0.78021	0.800329	0.767024	0.932082	1.05068	1.40363	0.984518	1.06123	0.91502	1.02963	0.82888	0.883365	1.00709	1.05395	0.96591	0.904593	1.16991	0.945283	0.785196	0.997448	0.740777	0.836809	0.881791	0.894061	0.656769	0.918814	1.00996	0.967396	1.10727	0.764825	0.743421	1.05302	0.665521	1.16301	0.832539	0.89736	0.760781	0.853454	1.25502	1.13552	0.990685	1.12543	1.02492	0.996301	0.787916	0.822291
479	chr2	42142275	42706203	1.15087	0.748298	0.928198	0.961968	0.759935	1.25283	0.770881	1.09743	0.896174	0.993012	0.953722	1.05638	1.01564	0.9836	1.10363	1.05044	1.11388	0.906348	1.11722	1.28746	1.10007	0.918844	1.12938	0.81946	0.977252	1.06684	0.8591	0.720059	0.94329	0.853783	0.917815	1.11683	1.16277	1.77398	1.21345	1.36251	1.17095	0.853457	0.875185	1.24194	1.08083	0.768063	0.884899	0.949781	0.656827	0.686357
480	chr2	42706204	43279901	0.783232	1.23378	1.00397	0.975458	0.741286	1.25625	0.921858	0.996175	0.978086	1.24071	0.780949	0.650976	0.990843	0.91711	0.718348	1.58316	0.901517	0.921515	1.02919	0.772793	0.88293	1.0454	1.13453	1.008	0.857989	1.0085	0.9882	1.04565	0.830267	0.913611	1.22009	1.02887	0.726583	1.49579	1.08649	1.38199	1.18675	0.849243	1.32501	1.24732	1.11921	0.912715	1.25291	0.847754	0.669233	0.701987
481	chr2	43279902	43813278	1.23631	0.932305	0.996047	1.17179	1.07732	0.789276	0.783904	0.981311	0.943339	1.21232	0.770679	0.858736	1.13721	1.0262	0.938402	0.912643	1.12549	1.16366	1.14079	0.769814	1.1229	0.900731	1.0744	1.19289	1.22155	1.0633	1.23663	1.05921	0.740232	1.21066	1.019	1.01454	1.10699	1.40877	1.29138	1.1551	1.11647	1.12137	0.96922	1.47033	1.28147	0.918289	0.891177	1.30501	1.3692	1.12085
482	chr2	43813279	44388866	1.16071	1.09427	0.731332	1.19457	1.08469	0.661213	1.00209	0.82189	1.03779	1.32523	0.732047	1.2415	1.05007	0.800392	0.951281	1.13554	0.789177	0.957337	0.85715	0.835797	0.975421	1.13302	1.18975	0.84779	0.813555	1.01644	0.821151	0.761985	0.885148	0.623817	0.724305	0.905562	0.873035	1.31113	1.43668	1.21472	1.00738	1.06558	1.15202	1.3737	0.832306	1.1437	0.869437	0.608505	0.892979	1.29246
483	chr2	44388867	44974897	0.847391	0.874084	0.884107	1.1661	1.06543	1.11583	0.724579	0.902834	0.956759	1.03486	1.31985	0.909959	1.00833	0.901336	1.08182	0.937062	1.12114	1.23845	0.916403	1.13106	1.00675	0.900493	1.00068	1.31046	0.941064	0.980161	1.00318	0.690053	0.96075	1.38138	1.08541	0.897214	0.554562	1.31826	0.956616	0.798383	1.17746	1.21353	0.737895	1.42484	1.39297	0.738576	1.26166	1.13118	0.84627	1.64146
484	chr2	44974898	45530274	1.05491	1.11124	0.822984	1.15563	1.1331	0.820031	0.965382	1.06813	1.04998	0.992599	0.848554	1.22259	0.95025	1.20367	0.992098	1.08372	1.09361	0.804524	1.17265	0.980353	0.847629	1.07836	1.13844	1.11979	0.853514	1.20088	1.07197	0.672267	0.81267	1.61064	0.757421	0.965399	1.131	1.85811	0.747868	1.2655	1.02296	1.01893	0.799808	1.33394	0.778739	1.00745	1.01735	1.18343	1.06449	1.54185
485	chr2	45530275	46061029	0.806099	1.11855	1.33625	0.883673	1.2828	0.827125	0.816086	0.876836	1.01224	1.21875	1.08106	1.01875	0.82942	0.902055	1.01198	0.764665	1.37864	0.954459	1.03518	0.884248	0.850778	1.08091	1.19527	1.25268	1.13099	1.17279	1.0017	1.18127	0.556226	0.994159	0.984551	1.06488	1.13925	0.821511	0.835856	0.828795	1.01333	1.14238	0.784891	1.21528	1.11035	0.807914	1.19904	1.30349	0.716619	0.666182
486	chr2	46061030	46573758	0.623983	1.22915	1.03677	0.773344	1.19077	1.2544	0.709536	0.938202	0.955408	0.960376	1.13152	0.969607	1.1972	0.679547	0.931722	0.939628	1.15993	1.08742	0.955518	1.2146	0.956168	1.0278	1.06192	0.79582	1.3325	1.0499	0.96722	0.893118	0.850244	1.22426	1.07116	0.991889	0.809326	1.12977	1.19847	1.08564	0.784794	1.10164	0.869984	1.10563	0.962292	0.970031	0.99413	1.274	1.39204	0.657528
487	chr2	46573759	47104378	0.844074	1.3209	0.567956	1.20644	1.17029	0.960786	0.774778	0.938638	1.07984	0.794131	0.937155	0.697964	0.921188	1.44576	0.905782	0.982929	0.722635	1.14401	0.975035	1.41995	1.1228	1.01801	0.997408	0.85819	1.05943	1.03594	0.84489	1.29684	1.22668	1.0482	1.04467	1.05132	0.881179	0.686088	1.10726	1.05474	0.955217	0.993405	0.846018	1.17727	0.810618	1.23463	1.00277	0.975567	1.15002	1.04174
488	chr2	47104379	47663655	0.687314	0.923278	1.05873	1.04917	0.898863	1.29422	1.11231	0.956763	0.925469	1.06442	0.754215	0.926869	0.975356	0.904148	0.80043	0.876368	1.33187	1.05948	0.972313	0.98496	1.40335	1.07414	1.14111	0.885903	0.936048	0.755157	1.05777	0.6668	0.962831	1.06701	0.762528	0.904863	0.708563	0.867922	1.16502	1.1199	0.860761	0.9673	1.16165	0.82109	1.24362	1.03101	1.0236	0.857737	1.22523	1.23151
489	chr2	47663656	48241842	1.12255	0.953297	0.737112	1.22328	0.661567	1.33905	0.927455	0.920679	0.939044	0.959196	0.57872	1.03021	1.1097	0.913451	1.17563	1.48093	1.26428	0.866896	0.95535	1.21112	1.53796	0.994402	0.977816	1.30941	0.708061	1.00316	0.973675	0.686259	0.931788	1.02005	1.06791	0.88998	0.904004	1.35827	1.41198	0.804554	0.888203	1.36881	0.912452	1.00834	0.582088	0.922932	1.0299	0.615563	0.961623	0.730728
490	chr2	48241843	48848589	1.00373	1.0183	0.87195	1.25959	1.0027	1.17097	1.26665	1.09997	1.00191	1.56395	0.776335	0.992525	1.04569	0.77597	1.41014	1.07755	1.17669	1.03477	1.03934	1.04792	1.34224	1.0314	1.19046	1.03218	1.16791	0.803292	1.10862	0.825123	0.90968	1.36941	0.892437	1.00947	1.22984	1.28124	1.23854	1.38686	1.0352	1.14731	1.12824	1.11641	0.869499	0.979989	0.817654	0.92416	1.10883	1.17352
491	chr2	48848590	49440252	0.513043	1.0853	1.10864	1.15975	0.938597	1.10214	0.978976	1.0774	0.89019	1.20968	0.825416	0.93129	0.830193	1.00349	1.16891	0.912306	0.731051	0.992663	0.901202	1.19312	1.67838	1.18842	1.23624	0.931026	0.919155	0.752998	0.954212	0.915978	0.99148	1.1648	0.646234	0.90429	1.198	0.762816	1.17206	1.08982	1.28223	1.14191	0.705127	1.22273	1.21715	1.17935	1.14275	1.21783	1.17452	1.26748
492	chr2	49440253	50059669	1.06479	1.36736	1.20994	0.773021	1.18896	1.22381	1.24933	0.961975	1.03968	1.4954	0.824224	1.07188	1.1419	1.11856	1.11807	1.03894	1.2597	1.25758	1.14427	0.957213	1.01998	1.1096	0.824813	1.07115	1.15584	0.761993	1.00136	0.700712	1.27798	0.991214	0.860958	0.732623	1.09068	1.43261	0.643703	1.6047	1.21996	1.33051	0.870397	0.712731	1.35557	0.986946	1.02096	0.833822	1.1524	1.07474
493	chr2	50059670	50667943	0.830087	1.06426	1.28839	1.18309	0.8955	1.07736	0.930977	1.08909	1.12015	0.951454	0.861772	0.853607	0.917633	1.19019	0.695439	1.11395	1.20685	1.09092	0.972552	0.97162	1.19435	1.1287	1.21232	1.04223	0.958083	1.0168	0.904077	0.787646	1.40243	1.08944	1.15278	0.852772	1.05151	1.22887	0.930838	0.83126	1.26134	1.14516	0.897124	1.06838	0.968437	1.0976	1.05716	1.11941	0.751338	0.85919
494	chr2	50667944	51225749	0.738023	1.20111	1.01617	1.07214	0.862763	0.923424	1.19828	1.00689	0.931539	1.02231	0.993162	1.39197	1.07544	0.813307	1.106	1.3168	1.24833	0.942253	1.05707	0.751027	1.10731	0.950046	1.33575	0.963701	0.836018	0.993508	0.948793	0.970182	0.922471	0.887096	0.680627	0.807019	1.08319	1.42778	1.21565	0.872337	0.915426	1.04038	0.670291	1.40265	1.22833	1.21059	1.00128	1.08728	0.904341	1.03564
495	chr2	51225750	51857655	0.658562	1.19629	0.97412	0.879	1.25647	0.880238	1.00887	1.02885	1.01426	1.01154	1.01087	1.04257	1.11141	0.772753	1.14178	1.00083	0.983092	0.861396	0.649853	1.03498	0.992921	1.01223	1.03767	0.581321	0.757521	1.15124	1.28482	0.97925	0.999678	1.26993	0.96438	0.877569	1.18411	1.2718	1.19993	0.826664	0.88472	1.07258	0.722905	1.33647	1.2089	1.16736	0.973442	1.12865	1.22341	0.83811
496	chr2	51857656	52495295	0.942223	0.711654	0.700875	1.03006	1.39054	0.692086	0.931758	1.03784	1.01295	0.947782	1.22143	0.814382	1.33289	0.962213	1.07234	1.32553	0.889674	1.13885	1.32288	1.32718	0.944838	0.941832	1.25023	0.961097	1.14318	1.00778	0.988376	1.08223	0.856619	1.06852	0.982331	0.871599	1.20295	1.05985	1.29668	0.850381	0.79777	0.983818	0.677208	0.981394	1.28007	1.02756	1.25596	0.90602	0.761737	1.06585
497	chr2	52495296	53121072	1.24856	1.12452	0.684181	1.24416	1.51498	1.51687	0.875649	1.06533	0.976376	0.78817	1.05459	0.852764	1.18771	0.94309	0.815643	0.97074	0.602308	1.26396	0.839004	1.06269	1.26447	0.939404	0.911454	0.909822	1.21141	0.838449	1.03934	1.01701	0.948742	1.19565	1.165	0.570893	0.952415	0.995055	1.0197	0.797767	0.68162	0.774583	0.835361	1.19413	1.07175	1.1598	0.8831	1.14204	0.90379	1.0093
498	chr2	53121073	53734472	1.15522	1.03105	0.911966	0.833371	1.1125	0.896882	1.10254	0.86036	0.924358	1.31314	1.09651	0.931206	1.04528	1.11142	0.815718	1.2214	0.890133	1.03187	1.0029	1.03469	0.935848	0.912301	1.24525	1.08379	0.878192	1.02328	0.795666	1.21649	1.14228	1.13494	1.05383	0.868444	0.930057	1.52024	1.02817	1.44572	1.07004	1.2197	0.897545	1.18704	0.84023	1.10225	0.794893	1.09541	1.10066	0.889836
499	chr2	53734473	54322414	0.719263	1.31798	1.17784	0.64844	0.807665	1.03177	1.00319	0.92607	1.01422	0.887261	0.847985	0.965024	1.25241	1.38398	0.948084	1.47019	0.95651	1.121	1.10358	1.22159	0.94874	1.03067	0.862631	1.09577	0.996618	0.876239	1.00752	1.11155	1.50898	0.783035	0.995957	1.08068	0.851488	1.02622	0.857062	1.05294	0.946341	0.982551	0.883836	1.16158	1.2871	1.3139	0.907951	0.815962	1.27996	0.984422
500	chr2	54322415	54873111	1.1971	1.20456	1.2722	0.823747	0.978567	1.39223	1.17816	0.906376	1.05177	0.892402	1.28405	0.715057	1.04202	1.40054	1.16291	0.806744	0.862152	0.854859	0.928645	1.50316	1.19724	0.954115	1.04562	1.07434	1.14013	1.16459	1.04552	1.21934	0.765564	0.784701	1.31768	1.03879	0.99717	1.05541	1.12005	1.18999	0.94418	1.14622	0.805032	0.687982	1.32608	1.22109	1.06233	1.16253	1.23285	1.09296
501	chr2	54873112	55410816	1.11413	0.695694	0.92661	0.779855	0.793723	1.35151	0.933273	1.21853	0.738519	0.764265	1.24842	0.812164	1.12423	1.06731	1.29632	1.09752	0.968416	0.71929	1.02895	0.977358	0.890462	1.04383	0.796477	0.99564	1.18003	0.913588	0.940996	1.12873	0.853779	1.18677	1.09066	0.936236	0.881043	0.968798	0.885691	1.69761	0.995028	1.10308	0.799083	0.868552	0.856517	1.05471	1.16448	0.922764	0.74256	0.911154
502	chr2	55410817	56016875	0.715111	0.877257	0.729116	1.10946	1.01845	0.900003	0.930167	1.13856	1.09729	0.647626	0.845209	0.994355	0.912567	0.88263	0.711937	0.974293	1.25732	1.40362	1.09532	1.16004	0.939626	1.02069	1.05299	0.668131	1.06632	0.851401	1.08935	0.675104	1.05905	0.616618	1.07174	1.15689	1.21687	1.20321	0.954993	1.90803	1.32922	1.34128	0.626985	0.587671	0.92227	1.19131	0.758098	1.17519	0.782779	1.1569
503	chr2	56016876	56585117	1.06037	1.21548	1.17329	1.21922	1.20217	1.36965	0.872892	1.00546	0.949406	0.800595	1.05416	0.934615	0.906179	0.821602	1.09559	1.04372	1.17465	1.50469	1.02403	0.915611	1.37691	0.979902	0.962813	0.865852	0.722176	0.84688	0.864936	1.50378	1.01857	1.09637	1.16405	0.812394	0.84993	1.22926	0.514591	1.18552	0.777637	0.684051	1.07525	1.21186	1.18948	1.06639	0.928575	1.19768	0.714429	0.904745
504	chr2	56585118	57199903	0.983547	0.818504	0.947173	0.956987	1.18334	0.974452	1.22957	1.08471	1.01224	0.865743	1.0286	0.940502	1.27035	0.924263	1.16823	0.944344	1.1301	1.36955	1.04298	0.849959	1.16511	1.16827	0.907954	0.955275	1.18173	0.907091	0.990805	1.02961	0.858557	1.25755	1.06872	0.987103	1.33038	1.56337	1.07764	1.22128	1.32193	1.04172	0.895644	1.17109	0.928938	0.831705	1.27482	1.28793	0.724122	1.08596
505	chr2	57199904	57860519	1.08953	1.12587	0.85742	1.09676	1.5003	0.973531	1.23276	0.877851	1.04331	1.08551	1.10572	1.06653	0.948284	0.963241	0.993404	0.875169	1.05172	1.40099	1.22915	1.07571	1.32338	0.9681	0.708752	0.954709	0.819893	1.0211	1.22411	0.718709	0.904549	1.43377	1.45203	0.790665	1.35349	1.36968	0.739054	0.73886	1.17911	0.923254	0.861184	0.809042	0.94691	0.703767	1.51614	1.17707	0.856537	0.88179
506	chr2	57860520	58480694	1.14911	0.941274	0.8337	1.17801	1.03891	1.11742	1.01843	0.951608	0.953666	1.03003	1.26301	0.991501	0.963235	0.720619	1.17497	1.23503	1.24523	1.15278	1.00588	1.50697	0.572707	0.998755	0.928996	1.20727	1.18669	1.14015	1.23731	0.639214	0.726769	1.25793	1.45235	0.851517	1.44473	1.47067	1.01546	0.965641	0.905594	1.31559	0.53101	1.28697	1.66594	1.01436	1.18668	1.04421	1.27412	1.06324
507	chr2	58480695	59064145	0.855654	1.1398	0.983623	0.703144	0.937493	0.863721	1.20649	1.0508	1.01099	0.829329	1.42025	0.69718	0.863261	1.05985	1.04201	0.53271	1.21095	1.1395	1.14879	1.14581	0.967003	0.913306	0.759004	1.27437	0.89852	1.25495	0.988956	1.02927	0.93249	1.25726	1.04713	0.832823	0.963496	0.662849	0.89712	0.75989	1.15369	0.988958	0.858678	1.06552	0.928146	0.894417	0.978917	1.00503	0.978564	1.19504
508	chr2	59064146	59626627	0.476818	1.05238	0.77848	1.02022	1.47767	0.925697	1.07863	0.787334	0.952756	1.04907	0.73224	1.13148	0.986939	0.957496	0.925686	0.790518	0.864031	1.28606	1.03289	1.02273	0.778658	0.942943	0.737225	1.27109	0.897106	0.863126	0.992331	1.19447	0.744089	0.705468	0.966206	0.830179	1.04458	1.04969	1.26014	1.12086	1.01391	1.38373	1.09095	1.23887	0.989384	0.749478	0.961739	1.00938	0.92499	0.697209
509	chr2	59626628	60218381	0.82569	1.15639	0.747228	1.10697	0.856904	0.988119	1.00179	0.956824	0.93172	0.813519	0.875177	0.731185	1.19896	0.848423	1.2399	1.22728	0.884475	1.41102	1.04455	1.04489	0.934602	1.01125	0.612769	0.893666	0.868609	0.937876	0.821204	1.01699	1.00229	0.743099	0.749962	0.974186	0.987152	1.07276	1.36114	1.33761	1.23176	1.11601	0.910676	1.17954	1.00599	1.38391	1.09036	1.07315	0.809155	1.06062
510	chr2	60218382	60766100	0.783073	0.737468	1.05088	1.12475	1.50526	1.1643	0.965778	1.02962	0.91519	1.05121	0.670773	0.590432	1.18612	0.935517	1.09876	1.23667	1.13812	1.18365	0.90351	1.73399	1.19121	1.00678	0.603298	0.941661	0.889828	1.21425	0.992108	1.01983	1.29729	1.09395	0.953485	0.891822	1.27109	1.10584	1.08682	0.855794	1.70376	1.34501	0.694911	0.894274	1.08111	1.00381	1.05156	1.23951	1.30801	1.15463
511	chr2	60766101	61371602	1.21105	1.26407	1.00683	1.02071	1.25671	1.0612	1.12768	0.815353	1.0179	0.600602	0.885355	1.00128	1.09377	0.931024	1.1814	1.08373	0.840803	1.02659	0.990356	1.43123	0.891195	1.08604	0.941887	1.21718	0.94464	0.857058	1.03289	1.01072	0.974032	0.928127	0.941638	1.25625	0.915628	0.822314	0.902712	1.01544	1.19992	0.965305	1.2174	1.14644	0.693768	0.848419	1.19051	1.19226	1.20474	0.917691
512	chr2	61371603	61963438	0.844371	1.26939	1.16622	0.857706	1.19499	0.994326	1.02679	0.939928	0.895483	0.969593	1.0961	0.861149	0.90168	0.946562	0.941098	1.08618	1.16269	1.10358	0.727537	1.25002	1.16675	1.04748	0.899475	1.48205	0.84393	0.958599	0.84047	0.880648	1.02624	1.35646	0.915481	1.04311	1.38534	1.08602	1.0396	0.76135	1.11541	1.35361	1.18083	1.07668	1.41424	0.98192	0.769857	1.18042	1.57577	1.34851
513	chr2	61963439	62528246	0.955753	1.03306	0.954276	1.1361	1.0784	1.27161	1.02709	0.997106	1.04782	1.10841	1.32058	0.739671	1.29964	1.00893	0.912164	1.56811	0.895532	1.3518	1.05517	0.751891	0.856524	0.926731	0.879281	0.891847	0.959687	0.90989	0.836983	0.972962	1.15857	1.07216	1.28057	0.657072	1.21903	1.05903	0.639188	1.16063	1.18276	0.969787	0.745504	0.897526	1.21017	1.11794	1.37165	0.655099	1.41998	0.766862
514	chr2	62528247	63091836	0.726886	0.945632	1.08436	1.11661	1.00771	0.986765	0.762011	1.34732	0.893902	0.974067	0.954636	1.01478	0.802526	0.747198	0.812382	1.10055	0.899358	1.21878	0.817352	0.757757	0.873627	0.902888	0.789413	1.10601	0.50998	0.866969	1.01712	1.03401	0.55603	0.994287	1.03366	1.04774	1.1012	1.23336	1.32607	0.924794	1.18481	1.25235	0.93805	1.00852	1.64529	0.980007	1.21356	1.03206	1.09513	1.82442
515	chr2	63091837	63693974	1.10717	0.975766	0.730093	0.928686	0.872966	0.900281	1.03361	0.981856	0.921324	1.02772	0.974201	0.816081	1.27072	0.974933	1.254	1.00813	0.690294	0.930901	0.923292	0.946931	1.03555	0.870273	1.0019	0.960178	1.04343	0.773014	1.13805	1.30191	0.741665	0.487307	0.815596	0.771728	0.859996	1.27852	1.23265	1.39993	1.13378	0.812751	0.723959	0.914469	1.20893	1.03281	1.20246	0.808333	1.05493	1.08659
516	chr2	63693975	64299928	0.828639	0.966831	0.956082	1.16552	1.04645	1.29558	1.0491	0.870951	1.03712	0.712028	0.94362	1.08657	0.888054	0.888807	0.835186	0.884722	0.88687	1.09948	0.930217	0.702603	0.943548	1.02812	0.939695	1.03185	1.04603	0.899655	0.964365	1.0592	1.0077	1.3219	0.816356	1.00795	0.930959	1.21515	0.924128	1.07374	0.846478	1.10955	0.93544	1.17888	1.10529	1.11385	0.887755	0.856692	0.797897	1.19622
517	chr2	64299929	64856705	0.89152	1.25939	1.04302	0.934938	0.683901	0.984637	1.14525	0.890092	1.16487	0.958463	0.765133	0.897272	0.987535	1.03008	0.800387	1.0264	0.899698	1.19516	0.793547	1.04223	1.20069	0.955426	0.777923	0.664956	0.814444	1.11221	0.896925	1.07375	0.804486	1.07344	1.33148	0.890455	0.975496	0.768638	0.964481	1.39816	0.99666	0.968111	1.16392	0.993555	0.878633	0.637684	1.08954	0.930856	0.923071	0.937639
518	chr2	64856706	65395037	0.816798	0.960922	0.737518	0.753293	0.743681	1.30718	0.869606	1.00729	1.09476	0.97001	0.665378	0.868006	0.831754	0.858131	1.05873	1.09493	1.2403	1.35164	1.11411	0.956281	1.06603	0.877619	0.526745	0.997658	0.849521	1.27169	0.98375	1.00971	1.10455	0.884646	0.925389	1.0422	1.0812	0.618804	0.984102	0.945521	1.18367	1.15205	1.04341	1.11843	1.04302	1.06005	0.694098	0.794331	1.34083	0.939885
519	chr2	65395038	65975717	0.853449	0.920202	0.98798	0.938438	1.07495	1.25881	0.825313	0.993393	0.902391	0.971831	0.977351	0.858776	0.790793	0.941951	1.12213	1.18227	0.860916	1.47283	0.712463	1.18917	1.54595	0.758858	0.615942	0.603543	0.969715	0.842365	0.972988	0.919527	0.807551	1.22573	0.690511	1.09686	0.992151	0.666056	0.80079	1.01109	0.849775	1.3159	0.937279	0.862649	0.687275	1.25301	0.978816	0.855683	0.789846	1.31304
520	chr2	65975718	66532901	0.827611	1.04282	1.00947	0.617913	1.29298	1.12428	1.13891	0.896774	1.14685	1.01921	1.08704	1.01495	0.996659	0.977352	1.02104	1.10702	1.1339	1.02669	0.742305	1.43138	1.24938	1.13212	0.661736	0.782516	1.13585	0.999336	1.07881	1.00673	0.92582	1.2443	0.912007	0.939587	1.36856	0.982066	0.771664	0.887154	1.10573	1.0871	1.03581	0.96178	0.882899	0.994315	1.17631	1.3317	1.23994	0.958717
521	chr2	66532902	67114299	1.00265	1.15988	1.05158	1.27379	1.23313	1.04485	0.995891	1.08348	0.990228	1.11405	1.15096	1.29341	1.23089	1.39293	1.1437	1.23048	1.04199	1.38155	1.13798	1.23882	0.86498	1.04412	1.04285	0.893919	0.781729	0.779076	1.06716	1.32264	0.802361	1.25048	1.3662	1.12384	0.994226	0.596567	0.763015	0.985438	1.44637	1.12599	1.13324	0.888903	1.04514	0.976802	0.845769	1.08476	1.01422	0.935615
522	chr2	67114300	67665165	0.809033	1.5854	1.04765	1.43539	1.1197	0.658619	1.03182	0.808889	0.830403	0.878523	0.632766	0.86332	1.1571	1.26132	0.837935	0.860898	1.14021	1.06964	1.19315	0.899531	0.397245	1.00896	0.842892	1.00636	1.07008	0.634937	1.14665	1.1606	1.23923	0.848762	1.27748	0.972325	0.81296	0.894726	0.838692	1.13625	1.11262	1.17513	1.07252	0.992894	1.1208	0.968107	0.934563	0.912563	0.711591	0.822445
523	chr2	67665166	68186107	1.1248	1.18223	0.878757	1.02277	0.757905	1.11422	1.02061	0.983795	1.03517	1.11381	0.761019	1.11271	1.20211	1.01088	0.755897	0.888606	1.1941	1.44557	0.950354	0.898429	0.897965	0.883792	0.723749	1.0489	1.28488	1.24619	0.891181	1.12713	0.745953	1.35708	0.770488	1.0976	0.834876	0.68939	0.812086	1.03699	1.00527	1.17713	1.17784	1.22462	1.19545	0.956418	0.937039	0.763512	1.17558	0.747843
524	chr2	68186108	68787302	0.720586	0.865288	0.968929	0.833695	1.00402	1.07251	0.92716	0.926705	1.18184	1.3316	0.906996	1.11812	0.978817	0.922162	1.23796	0.765453	0.897785	1.29429	0.920621	1.09796	1.33989	0.860277	0.590268	1.11069	1.03296	1.08374	1.03063	1.1623	1.36828	1.05871	1.10401	0.99982	1.13334	1.04041	1.13219	0.833406	0.828882	1.01293	1.05878	0.721027	1.31105	1.03287	1.06343	1.16059	1.14347	1.35841
525	chr2	68787303	69331267	0.895831	1.25474	0.767973	1.17572	0.72539	1.11932	1.11992	0.782037	1.05161	1.08958	0.874253	1.07039	0.913928	0.852914	0.851515	0.893101	1.01559	1.14649	0.830822	1.4147	0.817826	0.963309	1.17004	0.946651	1.19519	1.00987	1.07204	0.999815	1.33444	1.26724	0.986232	1.09047	0.997875	1.06287	1.13552	1.08553	1.05867	1.13425	1.11985	1.09338	1.21339	1.08278	0.908151	0.995732	0.807161	1.08851
526	chr2	69331268	69848186	1.03917	1.08637	1.13443	0.953981	0.755675	0.820792	0.886111	0.861487	0.971032	0.983024	1.00218	0.969517	1.23382	0.808722	1.08419	0.570846	0.912773	1.08749	1.06482	1.02173	1.19299	1.00057	0.956229	0.836556	0.910166	0.918187	0.988701	0.868564	1.1414	0.970018	0.931765	1.05815	1.24012	0.677509	0.830707	0.962574	0.840612	1.22208	1.06307	0.977304	1.15134	1.12998	0.967664	0.940058	1.0194	1.12994
527	chr2	69848187	70399683	0.936677	1.00885	0.949156	1.44312	1.26891	1.03905	0.938286	0.943822	0.848969	0.746073	0.619312	1.06765	0.766553	0.767523	0.947272	0.687041	0.925456	0.868486	0.881735	1.14922	0.974827	0.896649	0.970026	0.801502	0.949028	0.921661	1.02657	1.18328	1.08649	0.933595	1.08008	1.39619	0.71732	1.15594	0.95686	1.0028	1.08559	1.00138	0.721376	1.02993	0.902891	0.904529	0.898749	1.12475	1.34061	0.996564
528	chr2	70399684	70925997	0.858571	0.893787	1.4083	1.5244	1.06343	0.614717	0.948738	1.04807	0.910156	0.611493	0.665145	0.876383	1.31517	1.16739	0.811334	1.08154	1.10555	0.783178	0.913	0.961636	0.777305	0.97755	1.21291	1.07907	0.92112	0.780632	1.14245	1.01439	1.18774	0.854279	0.940144	1.0338	1.2116	0.93747	1.27485	1.21947	1.23153	1.2263	0.942456	0.999053	1.20552	0.865467	1.42866	0.838982	0.996358	0.720436
529	chr2	70925998	71466266	1.32449	1.3071	1.09693	0.970397	0.973756	0.883636	0.947906	0.989512	1.02395	1.17899	0.879845	1.19391	1.18526	0.820837	0.860705	1.85047	0.925126	1.11886	1.01371	1.01313	1.16274	1.01836	0.9696	0.877133	1.01301	0.780048	1.08214	0.883441	1.15956	0.885887	1.29877	1.00155	0.915249	1.28958	1.14517	1.14242	1.03816	0.954905	1.08815	0.800166	0.847602	1.02621	1.15421	0.722101	1.10291	0.766706
530	chr2	71466267	72019041	1.28375	1.14419	0.98444	0.715747	0.963024	1.06049	1.06287	1.15033	0.782488	0.875542	0.481814	0.991566	1.01357	1.10641	1.17855	0.933931	1.25949	0.8983	1.04322	0.860483	0.481941	0.992972	0.998988	0.90883	0.991157	0.830567	0.96701	0.512813	1.28376	0.758697	0.725794	0.823617	1.1383	1.15871	0.936657	0.80793	1.09119	1.23951	0.80387	0.838069	1.00405	0.695798	0.838964	1.05361	0.815447	1.18143
531	chr2	72019042	72560515	0.71165	1.05412	0.826573	1.1627	1.33187	0.843285	1.1091	1.10621	0.868721	1.33431	0.987499	0.998029	1.02703	0.682699	0.68858	1.03893	0.862241	1.03508	1.29491	0.7902	1.36626	1.08587	0.828335	0.889015	0.850942	0.935947	1.10568	0.978404	1.0886	1.28561	0.941486	0.917205	1.27253	1.4018	0.513281	1.23396	0.915359	1.05633	0.949657	0.547001	0.850121	0.922782	0.987157	1.1146	0.713384	0.965994
532	chr2	72560516	73127374	1.02783	1.1681	0.571005	1.19022	1.0166	0.915829	0.9823	1.14534	1.14588	1.49869	0.841216	0.644984	0.876281	0.773946	0.720327	0.76985	1.49256	1.10622	1.05978	1.35132	1.09924	0.969674	0.91957	1.05197	0.923346	0.871015	0.95609	0.951801	1.01695	1.19951	1.29721	0.941446	0.852304	1.11619	1.25827	1.34825	1.22704	1.20526	0.926648	0.875458	0.835242	0.542825	1.02346	0.874637	1.0842	0.90244
533	chr2	73127375	73681096	0.847686	1.00717	0.899429	0.766339	1.02637	1.11234	0.898417	1.01501	1.0115	1.12116	0.980195	0.877163	0.970417	0.919612	0.971976	1.29729	0.869723	0.902513	0.874226	0.911169	0.89454	0.957781	1.12242	0.86613	0.897015	0.855773	0.770586	0.876214	0.657518	1.23632	1.01265	0.886745	0.716694	0.751001	0.99248	1.62193	1.088	0.971984	1.27148	0.722081	1.51634	1.22621	1.23679	0.918222	0.755643	1.21891
534	chr2	73681097	74197867	1.14103	0.842152	0.482424	1.23631	0.969767	0.685236	0.936802	0.950184	0.869195	1.09492	0.695869	0.962834	0.855809	1.11445	0.925922	0.737085	1.06403	0.968846	1.20019	0.998882	0.765857	0.941613	0.864486	1.1869	0.953474	0.895318	0.884325	1.00951	0.937232	1.41812	1.15625	1.16199	1.07592	0.452144	0.866616	0.938674	1.3624	1.17292	0.508858	0.798883	1.12608	1.28134	1.11774	0.839951	0.589981	0.7408
535	chr2	74197868	74739669	1.16712	1.07319	1.40761	1.18355	1.0116	0.941204	1.25726	0.971656	1.06426	0.969991	1.12583	1.48019	0.920199	0.988491	1.39483	1.1277	0.542627	1.01681	0.920409	1.05434	0.761429	0.953515	1.07919	0.700403	1.4974	0.960442	1.05935	0.910931	1.05078	1.13732	0.878697	1.16857	0.86962	1.46985	1.53726	1.30288	1.38107	1.15189	1.13806	1.18302	1.26395	1.15823	1.0142	1.08982	0.756242	1.39773
536	chr2	74739670	75274397	0.931299	0.66973	0.637627	0.614422	0.630046	1.25048	1.06189	0.936728	0.860139	0.752207	0.928371	1.05512	0.958955	0.75326	0.884723	0.707643	0.789668	1.12078	1.00429	1.00755	1.03551	1.0403	0.71292	0.758526	0.930509	0.779179	0.94054	0.90721	1.11058	0.563849	0.717348	0.93133	0.894598	1.3683	1.38987	1.22199	1.01008	1.47826	0.798894	0.581627	0.714249	1.03746	1.06137	1.09274	1.144	0.935335
537	chr2	75274398	75824412	0.93257	1.02755	0.761262	1.13499	0.919311	1.5397	0.984956	1.03078	0.938235	0.924856	0.871322	0.612956	1.14931	1.07611	1.18581	0.59151	0.643899	0.828746	1.22051	1.00905	0.628079	0.868803	1.09459	1.36915	0.737476	0.810211	1.01568	0.992028	0.940768	1.02377	0.802105	0.968974	1.25921	0.741006	0.814458	0.802344	0.847152	1.25271	1.12767	1.23809	1.49569	0.96704	1.23521	1.16958	0.961418	1.21072
538	chr2	75824413	76402788	0.597478	1.26019	0.887723	0.953236	1.05787	0.733929	1.04439	1.00483	0.819432	1.1032	0.928102	0.983186	1.01173	1.02231	0.933188	0.539037	1.19822	0.730804	0.993149	0.774265	1.43093	0.959142	0.654394	1.32023	0.678411	0.793717	0.975868	0.751066	0.992821	0.81516	0.836834	0.937041	0.85037	1.4112	0.725558	1.28496	1.24146	1.24645	1.00105	1.37835	1.15757	0.932909	1.05883	0.822561	1.22178	1.14903
539	chr2	76402789	77005801	1.05875	0.992689	0.839669	1.26094	0.91781	0.692303	0.861198	0.810783	0.922921	0.754623	1.05078	0.787196	0.987353	1.02429	1.45871	0.772335	1.19133	0.984569	1.04963	1.44171	0.918741	1.02987	1.14668	0.829411	1.37764	0.99453	1.22417	0.921001	1.48658	1.44238	0.884325	0.76906	0.963298	1.67294	1.19155	0.718541	0.996762	0.933419	1.04573	0.839825	0.973578	1.09825	1.48523	0.969518	0.976884	1.2615
540	chr2	77005802	77635480	0.781882	1.02922	0.856297	1.07398	0.838495	1.12915	1.01861	0.915841	0.964281	1.03033	1.21823	0.745038	0.915333	0.790412	1.15659	1.00071	1.20221	0.794109	0.861772	0.953826	1.54866	1.10983	0.97903	0.810865	0.982939	0.885142	1.13441	0.696461	0.856881	0.855626	1.08683	0.969226	0.909256	1.27222	0.654951	0.871688	1.24097	0.865798	0.858951	0.790523	1.03561	0.934708	1.48581	0.906202	0.97876	1.27812
541	chr2	77635481	78298586	1.07175	1.05477	0.684462	1.24684	0.729536	0.97386	1.13516	1.10258	0.996734	1.36861	0.942068	0.809717	1.16864	0.750879	1.0499	1.02653	1.05407	0.908448	0.859559	0.813108	1.32196	1.04045	1.03183	0.858944	0.954112	1.15616	0.981097	0.850961	1.05186	1.0862	1.2198	1.11182	1.07192	1.19296	1.29466	1.08895	1.10942	1.09976	0.913392	0.800519	1.125	0.934858	1.19226	1.10844	1.28339	1.16382
542	chr2	78298587	78949255	1.14765	1.00613	0.901608	1.04415	0.861007	1.10918	1.23414	0.885774	0.957999	0.886028	1.24564	0.965726	1.551	1.22495	1.15348	0.621406	0.637921	1.15089	1.24547	1.26394	0.902042	0.952926	1.10533	0.961765	0.959097	1.00633	0.998108	0.883994	1.41174	1.25962	0.846543	0.976657	1.43585	1.21165	1.03125	1.07641	0.897556	0.95128	1.01005	0.497159	1.33979	1.26422	1.12584	1.03629	0.891067	1.10034
543	chr2	78949256	79567436	0.938777	1.04261	1.25926	1.11013	1.3599	0.930928	0.88706	1.00492	0.935458	0.825143	1.02925	0.909558	0.774448	1.00665	1.18829	0.880636	0.68301	1.00003	0.808306	1.24931	1.13174	0.913696	1.22365	0.927466	1.25194	0.849667	1.35901	0.628799	1.09785	1.29924	1.1423	0.770007	0.951101	0.738695	0.940407	0.670606	0.919196	1.10172	0.956568	0.978945	0.937578	1.35031	0.946604	0.99976	1.1374	1.10598
544	chr2	79567437	80174024	1.17827	1.18178	1.06913	1.09958	1.08146	0.702458	1.06829	1.0224	0.994509	1.1351	0.894989	0.717746	0.876986	0.728829	0.988673	0.957468	1.08162	0.925476	1.14841	1.0526	0.91389	1.02571	0.943657	1.24125	0.828148	1.08589	1.1355	0.861119	0.774163	1.46588	1.30029	0.813196	1.13522	1.32815	1.19006	0.961059	1.24557	1.19194	0.934292	0.889658	1.3382	0.989109	1.27025	0.918086	0.997551	0.976316
545	chr2	80174025	80737675	0.971208	1.49027	0.774705	1.04975	0.659823	0.692382	1.05077	0.938327	1.09512	1.08299	1.45268	0.866257	1.26383	1.37768	1.28309	1.03629	1.49123	1.26995	1.2518	1.52074	0.930971	0.958331	1.34346	0.854324	1.31962	1.05152	1.06748	1.06067	1.10074	0.979482	0.926766	0.698931	1.01023	0.794751	1.01222	1.10228	1.04436	0.993987	1.12115	0.938891	0.885942	0.719107	1.13987	1.0058	0.808361	1.27416
546	chr2	80737676	81322909	1.55831	0.991939	0.915721	1.14121	0.895131	1.13777	0.734849	1.01886	0.87792	1.1836	1.21597	0.893713	1.04261	1.34291	1.15464	1.05098	1.20011	1.18364	1.0979	1.22619	0.868348	0.984206	0.731264	0.830145	1.00675	0.892254	1.17464	1.11505	1.26488	1.01578	1.3532	0.805527	0.486932	1.9841	1.08377	0.898614	0.750988	1.0509	0.956576	1.03633	1.14516	0.890869	0.818783	1.2771	1.03607	0.860337
547	chr2	81322910	81967414	0.888077	1.14292	0.734694	0.859848	1.15538	1.26954	1.17846	0.92405	0.953696	1.04481	1.22968	1.18014	1.33828	1.62715	1.02424	1.28262	0.798956	1.57106	1.1847	0.9331	1.17802	0.90384	1.03069	0.835925	0.815317	1.08962	0.987072	0.910546	1.07013	1.13734	0.937196	0.713071	1.09937	0.82125	1.21288	1.06463	1.23302	1.14315	0.959683	1.13339	1.10732	0.969325	1.19685	0.888758	1.10239	1.39551
548	chr2	81967415	82609727	0.927302	1.32035	1.00468	1.35423	1.01175	1.34517	1.02178	1.07411	1.04748	1.08596	1.17115	0.865009	0.916005	1.23703	1.30927	1.22599	1.15143	1.00181	1.33033	1.1118	1.31835	1.00635	1.09734	1.10134	0.993449	0.978173	0.945598	0.942266	1.05862	1.18489	1.0803	0.921276	0.95131	1.61352	0.971614	0.815218	0.732039	0.977822	1.17966	1.04288	1.47103	1.19863	1.07733	1.01167	0.939376	1.2236
549	chr2	82609728	83265518	1.04455	0.98539	0.929758	0.968722	0.991718	1.02101	1.0417	1.13697	0.908697	0.808406	0.999898	1.05949	1.19398	1.15205	1.27361	0.887493	1.06916	1.19184	1.09334	0.917074	0.909001	1.14994	0.815294	0.925708	0.971398	0.769031	0.958517	1.02463	0.96119	0.988562	0.854985	0.887042	1.05765	1.19619	0.976537	1.01255	1.20139	0.858379	0.929508	1.18056	1.17959	1.19421	0.871308	0.895286	0.932118	1.02468
550	chr2	83265519	83915331	0.897349	0.945577	0.784218	1.23717	1.40596	1.02291	1.18107	1.0092	0.972932	1.36268	1.04448	0.949343	1.03315	1.18874	1.18658	0.917293	0.995766	1.28548	0.804665	1.00691	1.03457	0.983709	0.80284	1.20816	0.867457	0.975482	1.08739	1.17411	1.0094	1.15182	1.19182	0.914351	0.966619	1.18518	0.826872	1.23528	1.0453	0.987481	0.842641	1.25107	1.11001	1.59593	1.14291	0.995863	0.841434	1.36411
551	chr2	83915332	84531358	1.02472	1.2085	1.02118	1.26289	1.16273	1.09543	0.824349	1.0542	0.974283	0.911997	1.34204	1.13376	1.16992	0.834113	1.00845	1.29356	0.739492	0.885995	0.938853	0.758197	0.862675	1.14009	1.22873	1.00315	1.00384	1.09148	1.16519	0.829141	0.932102	1.06695	1.07066	0.817506	0.791678	1.00928	0.816729	0.831922	0.851527	1.3711	0.879458	1.04748	1.17637	0.977304	0.870177	0.991121	1.13877	0.915859
552	chr2	84531359	85113634	1.13912	1.12902	0.652024	0.884887	0.903198	1.10447	1.03454	0.956299	1.07387	0.791432	1.12552	1.31554	1.43885	1.1896	1.01845	0.829881	0.88047	1.26252	1.08696	0.835079	1.29691	1.10598	1.04406	1.22505	1.01281	0.844015	1.37985	1.11922	0.997309	0.889294	0.963459	0.826766	1.18727	1.21551	1.50656	1.26395	0.992742	1.25766	1.16396	0.954169	1.08669	1.08006	1.40358	0.763278	0.812282	1.20219
553	chr2	85113635	85662722	1.10698	0.980656	1.11094	1.16143	1.05254	0.943707	1.04001	0.946547	0.887727	0.722371	0.925464	1.31441	0.890048	1.16997	1.05575	1.28599	1.25243	0.852075	0.914392	0.878002	1.13534	0.87089	1.10102	1.0868	1.00235	0.893931	0.862067	0.710542	1.12076	0.893972	1.22427	1.08882	1.05388	0.651808	1.18611	1.02944	1.03511	1.43511	0.798885	1.62945	0.699592	1.27963	1.4945	0.910949	1.19364	1.0325
554	chr2	85662723	86193776	0.799253	1.32609	0.802975	0.78239	1.14439	1.28175	1.38547	0.953168	0.919122	0.974603	0.846612	0.970476	1.04664	1.0761	0.905097	0.980177	0.901872	0.789374	1.10404	0.923423	1.0347	1.00262	1.18782	1.07734	0.934463	1.08496	1.02907	0.727577	0.91117	1.36808	1.23026	0.90256	0.790822	1.11612	1.25139	0.802741	0.972331	1.20693	0.938732	1.21955	0.516637	1.29134	1.04267	1.00985	0.96466	0.912812
555	chr2	86193777	86713141	0.934915	0.93535	0.810804	0.805099	1.22872	1.25336	1.00032	0.843824	0.916986	0.832304	1.18679	1.00088	0.584157	0.913177	1.06364	0.962943	1.12065	1.00112	1.08362	1.09475	0.978018	0.972869	0.921128	0.630023	0.878823	1.00284	0.759293	1.15362	0.751462	1.38364	0.93736	0.890024	1.08987	1.53935	1.07675	0.717714	1.22109	1.23812	0.735103	1.1552	1.60938	1.09078	1.05927	1.0615	0.998494	0.99121
556	chr2	86713142	87244542	0.965968	0.788771	0.901767	1.27438	1.11131	1.04806	0.855945	1.05004	0.979154	0.81243	0.68992	1.05872	1.02852	0.926044	1.05723	1.11589	1.25908	0.943879	0.708998	1.2222	1.1254	1.10283	1.08385	1.23053	1.17516	1.01899	0.97347	1.22024	0.707307	1.01489	1.12102	0.846939	1.1016	1.50589	1.09479	1.08183	1.07637	0.941882	1.08147	0.88142	0.630618	0.963659	1.19465	1.07327	0.887133	1.12972
557	chr2	87244543	87719425	1.24555	1.13866	0.730306	0.619101	1.07666	1.00324	1.05431	0.913691	0.835776	1.05016	0.769266	1.07116	1.37818	1.0486	0.999751	1.04179	0.838215	1.04879	1.2676	1.25467	1.34849	1.07593	1.03987	0.834888	1.22086	1.02201	1.24506	0.819712	0.821209	1.10481	0.932144	0.836149	0.955801	0.864898	1.07864	1.06916	0.965897	1.28003	0.941293	1.546	1.20903	0.814394	1.28088	0.900284	1.22505	1.15757
558	chr2	87719426	88176626	1.16826	0.7564	0.663224	1.21505	1.26122	0.881471	1.03308	1.04925	0.981849	1.27537	1.01678	1.07872	0.897422	0.910324	1.47367	1.11515	0.919804	1.20665	1.11672	1.11264	1.49799	0.929239	0.977785	0.962329	0.804171	1.20222	1.31907	0.856893	1.32295	1.05028	0.882186	1.05539	0.954622	0.769596	0.815057	0.88177	0.965764	1.03982	0.786606	0.732704	1.16478	0.776447	1.02923	1.02084	1.14506	1.34941
559	chr2	88176627	88762188	1.08027	1.16019	0.903698	1.22811	1.23902	0.764855	1.07946	1.0424	0.891176	1.28999	1.13202	1.06469	1.22251	1.13848	1.01422	0.965677	1.09815	0.929881	1.18664	1.12002	1.16547	1.21518	1.22937	0.761929	0.879423	1.0825	0.972218	0.939963	1.08368	1.00286	1.05948	1.19109	0.957281	1.07744	0.886371	1.00745	0.898373	0.934584	0.786691	1.04849	1.05672	1.03116	1.19478	1.28582	1.38453	0.929974
560	chr2	88762189	89346597	1.20224	1.10961	0.689255	0.775633	0.858154	1.27899	0.994283	1.28016	0.937092	1.06254	1.16665	1.14375	0.889426	1.31327	1.28325	1.14993	1.13216	1.47589	1.20183	1.01081	1.35338	0.813751	0.769115	1.28049	1.0827	1.0284	1.13371	1.17239	1.18866	1.74541	1.08882	1.13061	0.864858	1.13198	1.01181	0.984861	0.83153	1.10382	0.772426	1.08582	0.748688	1.04707	0.714036	0.877635	0.961063	0.554396
561	chr2	89346598	89990370	1.15478	1.28234	0.642312	1.09175	0.825089	1.04676	1.08182	1.0825	1.1687	1.20015	1.41873	0.838739	0.929183	0.741685	1.03893	1.36373	0.870544	1.04287	1.24742	1.43193	1.16445	1.0904	1.17879	1.19799	1.01807	0.83843	1.0633	0.787906	1.11164	1.48462	0.927898	0.904485	1.08389	1.26535	0.795078	0.957087	1.06104	1.55685	0.854404	0.827523	1.27286	1.09332	1.14088	1.08722	1.37963	1.47558
562	chr2	89990371	90376609	0.715598	1.13121	1.12919	0.779967	1.34062	0.990212	1.23213	1.20759	0.988784	0.569181	1.20268	1.16147	0.95531	1.03114	0.840272	0.831133	1.11066	1.14496	0.934839	0.87834	0.713078	1.12679	0.72299	0.926758	0.637073	0.779815	0.861956	0.630092	0.934	0.649144	0.553273	1.06338	0.791929	1.04794	0.547212	1.06769	1.1808	1.18373	0.235144	1.00987	1.16062	0.508598	1.38994	1.0078	1.09215	1.01473
563	chr2	90376610	91619109	1.22331	0.935626	0.68983	1.11074	0.814734	1.4114	1.11552	0.981092	1.03538	1.02427	0.967127	0.763644	1.08987	1.10058	1.1209	1.50943	0.887503	1.30303	0.90695	1.42086	1.1598	0.96374	1.16984	1.15041	1.00396	0.823761	1.02088	1.27836	0.976714	0.805806	1.0007	0.576125	1.20724	1.01464	0.860731	1.16632	0.935001	1.01733	0.768047	0.716636	1.11039	1.01039	0.993567	1.06161	1.08992	1.34154
564	chr2	91619110	91788864	1.22947	0.882434	0.81562	0.9788	1.07955	1.22385	1.04065	1.08437	0.974492	1.00326	0.904089	0.902443	0.959928	0.819904	1.19644	1.80566	1.21198	1.16918	1.02831	1.12726	1.48943	1.04691	1.10771	0.924086	0.847579	1.03923	1.01669	1.09485	1.22623	1.10131	0.795255	1.20093	1.04323	1.15353	0.776602	0.880072	0.801045	1.14332	0.959926	1.09393	0.996426	1.18684	0.777398	1.23956	1.22296	1.07868
565	chr2	91788865	91968499	0.807699	0.782749	1.01585	0.967056	0.983461	0.92986	0.840202	0.984851	0.871664	1.03657	1.07886	0.749788	0.979325	0.733664	0.778339	0.868513	0.751863	0.880861	0.679108	0.958446	1.08695	0.831171	1.01064	0.98503	0.738359	0.661654	0.820121	0.760557	0.749834	0.928221	0.835061	1.03291	0.815895	1.13251	0.903845	0.957233	0.789414	1.03281	0.683226	0.662094	0.94478	0.908293	0.928893	0.895337	1.14403	0.859611
566	chr2	91968500	92291438	0.760352	1.09199	1.06255	1.16449	0.855683	1.01761	0.815607	0.89625	0.857598	1.08836	0.906595	1.03468	1.01857	0.87556	1.11877	1.01256	0.950803	0.700917	1.11505	1.24114	1.03342	0.82015	1.0369	1.23701	1.08207	1.23161	0.943124	1.1692	0.800633	0.688979	1.20244	0.969248	0.865792	0.859735	0.981614	1.19438	0.563563	0.726516	0.717095	0.689068	0.782422	1.14692	0.742	0.624528	0.818278	1.05411
567	chr2	92291439	92323508	1.22263	1.28308	0.894547	1.0579	1.13485	0.951363	0.878472	1.23398	0.97644	1.04949	1.35716	0.892319	0.930412	1.25029	1.37311	1.17581	1.18336	1.61369	0.970119	1.23107	0.987911	1.00006	1.15458	1.31547	0.955386	1.00852	1.42976	1.22967	1.08541	0.973374	0.955208	0.803283	0.977994	1.42879	1.17055	0.763122	0.811449	1.28037	0.964434	1.50171	1.11299	1.09195	1.0718	1.37702	1.19122	1.20399
568	chr2	92323509	95739877	1.60628	2.08422	1.67634	1.84726	2.03862	1.35952	1.28899	1.83642	1.43129	1.5421	1.67316	1.68841	1.82136	1.69608	1.53521	2.10565	1.90987	1.79827	1.79728	1.69583	2.28178	1.72657	1.9322	1.41771	1.27818	1.34742	1.83393	1.60315	1.90243	1.63336	2.29453	1.15554	2.17708	1.79782	1.38891	2.32235	1.24195	1.41277	1.49471	1.59859	1.41853	1.93659	1.82452	1.70425	1.55263	1.66432
569	chr2	95739878	96263241	1.48732	1.30131	0.978772	1.16456	1.20976	1.16785	1.03156	1.63448	1.31962	1.12417	1.20157	1.3948	1.35697	1.24943	1.4694	1.05055	1.70176	1.60538	1.4385	1.15024	2.18283	1.37124	1.22947	1.34474	1.86017	1.35108	1.53435	1.81638	1.33883	1.42072	1.52097	1.42021	1.14939	1.27522	1.39869	1.12192	1.70458	1.33944	1.37105	1.30196	1.14558	1.64542	1.53967	1.86242	1.41063	1.51355
570	chr2	96263242	96748874	1.19918	0.803498	1.2502	0.848929	0.789094	0.680498	1.05619	0.926519	0.93709	0.833305	0.961521	0.924921	0.990029	0.843121	1.07942	0.96736	1.39994	1.36922	0.943436	1.36694	1.35886	1.0287	1.38359	0.825751	0.966219	1.10513	0.912432	1.33736	1.04583	0.935348	1.23365	0.990915	0.973661	1.44736	1.37633	0.94849	1.27873	0.843465	0.734521	1.2013	1.19967	0.797542	1.25008	0.912868	1.02412	0.899391
571	chr2	96748875	97323101	1.04249	1.07697	1.03716	0.678393	1.05897	0.968698	1.02732	1.10138	1.00976	0.93725	0.814094	0.671828	1.03179	0.612634	0.765676	0.891627	0.931056	1.03702	1.06261	0.974124	1.52945	1.1356	0.826521	1.04537	1.00195	0.737996	1.15808	0.953342	1.22035	1.11516	1.08433	1.03661	0.872469	1.49627	1.45655	0.783783	0.841324	0.9691	1.16545	0.783364	1.17782	0.888868	0.953483	0.898857	1.69586	0.892348
572	chr2	97323102	97922929	1.23479	1.09784	1.19791	0.950858	0.908216	1.20157	1.30437	1.05564	0.923164	1.20484	0.991237	1.07017	1.26882	1.17265	1.06339	0.900267	1.00668	1.67437	0.934501	1.18208	1.58236	0.989427	1.11321	1.11193	1.02771	0.864494	1.00573	0.903175	1.11051	1.50953	1.16655	0.811309	0.99647	1.00469	0.986026	0.825338	0.885573	1.32279	1.05042	0.71418	1.44863	0.853354	1.01594	1.0817	0.572583	0.934096
573	chr2	97922930	98391350	1.10562	0.994607	0.615262	1.13638	0.996576	0.859	1.17788	0.991751	0.958835	0.886818	0.84724	1.1289	1.00394	0.936594	1.15754	0.988728	0.969907	1.43475	0.887398	1.0727	1.14689	1.08775	0.940132	0.938091	0.899602	0.883978	0.979189	1.20136	0.846917	0.974739	1.43209	0.541088	1.01428	0.819439	1.02474	0.734775	1.15997	1.27099	0.839179	1.00955	1.39206	0.928895	0.933836	1.32509	1.10183	1.03914
574	chr2	98391351	98952421	0.959696	0.898627	0.901864	1.15428	0.984169	1.41249	1.37253	0.983811	1.09865	1.36648	1.07231	1.57536	1.27345	1.61805	0.974706	0.924596	1.24024	1.13068	0.791793	1.10314	1.75062	1.08314	1.36197	1.0809	1.22474	1.14855	1.17177	1.37361	1.37596	0.978524	1.26427	1.26393	1.26846	1.00728	0.704897	1.01797	1.02988	1.0062	0.993546	1.24836	1.60649	0.74614	0.931242	0.941239	0.754733	0.891264
575	chr2	98952422	99477768	0.647741	1.05096	0.677595	1.0019	0.944846	0.887524	0.775275	0.956738	0.843972	0.992798	0.87611	1.03538	0.974948	1.09165	0.588175	0.942096	1.03372	1.22963	1.04717	0.760652	1.32144	0.826303	1.02749	0.810243	1.19856	0.950322	0.891728	0.87208	1.09984	1.23551	1.06076	1.07213	1.08311	0.962061	0.559137	1.11217	1.10941	0.951397	0.883713	0.837116	1.30876	1.00047	0.835699	1.09286	1.34931	0.796387
576	chr2	99477769	100062227	0.959478	1.02124	1.37158	0.879448	1.23242	0.939045	1.17674	0.921832	1.02616	0.99503	1.19422	0.739305	0.883109	0.810905	1.02206	1.41117	0.601593	1.27035	0.918815	0.780615	1.13816	0.90895	0.811007	1.70375	0.842989	0.782809	1.0492	1.22985	0.622539	0.999308	0.832356	0.99159	0.608499	0.947125	1.0055	1.11928	1.08072	1.09284	0.987937	1.0633	0.817921	1.03173	0.860054	1.09483	0.873768	1.03861
577	chr2	100062228	100616222	0.972321	0.811373	1.30969	1.2949	0.969767	0.990281	1.29149	0.768237	0.8776	0.511281	0.925457	1.15084	0.79324	0.942435	0.969939	1.00088	0.851212	1.14577	1.01251	1.20264	0.861994	0.803507	0.857875	1.45109	1.02146	0.970399	0.870884	1.05785	0.816424	0.950262	1.15357	1.06972	0.722203	0.982729	0.960643	1.3574	1.12269	0.9639	1.03754	0.581729	1.14467	1.09149	1.09306	0.866461	1.48692	1.32066
578	chr2	100616223	101174461	1.10829	1.07617	0.980148	1.16322	0.87291	0.563854	0.908603	1.00112	0.843639	0.800176	0.887337	0.839174	0.856822	1.1905	1.0882	0.636693	0.739578	1.39801	0.953475	1.16056	0.968206	0.784963	1.00594	0.98416	0.894741	1.03187	1.01093	1.06153	0.948595	0.898739	0.999996	1.14943	1.13072	1.16456	1.13591	1.18922	1.25397	1.07915	1.0291	0.95419	0.665251	1.06839	1.12444	1.13261	1.19266	0.657737
579	chr2	101174462	101707352	0.953114	1.09424	0.817279	1.18398	1.01086	1.13498	0.688671	1.06075	0.79613	1.4259	0.853568	0.714955	1.013	0.839958	1.1689	1.00191	1.06446	1.45356	0.957901	0.75138	0.620713	1.09482	1.15633	0.888897	1.15851	1.05404	0.951311	1.45362	1.04403	0.908785	1.4399	0.849826	0.891625	1.05868	1.09611	1.20619	0.870777	1.40443	0.992541	0.791187	1.04996	1.13601	0.708062	1.25325	1.0122	1.06026
580	chr2	101707353	102269997	0.971634	1.2161	0.607608	1.32414	1.43749	1.34029	1.00058	0.978666	0.817884	1.25521	0.695743	0.86159	1.11248	0.881651	0.919564	1.08126	0.952858	1.43822	0.743731	1.01853	1.2369	0.890925	1.10067	0.959677	0.924254	0.775409	1.04823	1.26632	1.12253	0.596778	0.964783	1.16269	0.649641	0.949168	0.94622	1.09814	1.17626	0.795701	0.682625	1.04718	0.89434	0.990405	0.889141	0.835169	0.940442	1.00576
581	chr2	102269998	102808137	1.34977	1.39231	0.858898	1.57138	1.29465	1.26707	1.14724	0.985569	1.15707	0.867337	1.18113	0.828292	1.19984	0.759691	0.912418	1.3209	1.02201	1.19127	0.897236	0.73377	1.17862	0.859443	1.20122	0.912504	0.84562	0.848985	1.04466	1.00365	0.861161	0.962529	0.865983	1.12022	1.01747	0.800914	0.868939	0.788065	1.12508	1.05937	0.87535	1.3666	1.49768	1.33913	1.04287	0.933961	1.42432	0.838749
582	chr2	102808138	103380847	1.56405	0.876375	0.846111	0.72556	1.26347	0.978253	0.822685	0.94098	1.04567	0.871942	1.30932	1.03556	0.813259	1.13646	0.936106	0.313468	0.925279	0.828603	1.06201	0.9173	0.979044	1.05389	1.14732	0.78587	1.08483	1.00507	1.21771	1.24077	0.777736	1.04572	0.956273	1.0353	1.19153	1.56825	0.910953	1.25091	0.936499	0.955248	1.1781	0.893847	1.60159	1.06027	1.17996	0.854972	0.958393	0.905973
583	chr2	103380848	103958916	0.909233	1.08833	1.07405	0.780777	1.09971	0.575057	0.942941	0.816368	1.08501	0.99214	0.717126	0.613681	0.973515	0.97105	0.890674	1.42901	1.18863	1.18504	1.08154	0.931835	1.06618	1.05787	1.15623	0.976934	0.470092	0.825574	0.974614	0.665824	1.26557	0.726898	0.973749	1.19989	0.916854	1.39151	0.800503	1.10037	1.01418	1.11159	0.878134	1.24719	0.791065	1.09923	0.801779	1.09024	1.20418	0.964138
584	chr2	103958917	104583262	1.06395	1.07461	0.664073	1.15	0.929604	1.2043	0.960579	1.05116	0.902971	1.03423	0.497635	0.926262	0.752761	1.02068	0.698628	1.15509	1.01691	1.38652	0.953778	1.09366	1.27607	1.04934	1.37539	0.99851	1.18181	0.935575	1.30775	1.33722	1.29332	0.792995	0.797211	0.932586	0.809939	0.731683	1.42683	0.771152	1.0501	0.816069	0.796269	1.28145	1.46019	0.987494	1.02352	1.05966	1.51187	1.30481
585	chr2	104583263	105157092	1.12018	1.23751	0.719895	0.728965	1.42549	0.833342	1.14558	1.01738	1.05058	1.06956	1.18231	1.02098	0.970667	1.21431	1.1375	1.04414	1.12145	1.12196	1.07736	1.32185	0.967666	1.04767	1.16495	0.920896	1.00438	0.951579	1.32443	1.19452	0.91243	1.02937	1.35206	0.889575	1.02468	0.950631	1.48412	0.801483	0.834719	1.17054	1.06836	1.59397	1.13531	1.02463	1.15902	0.791674	0.86075	1.06919
586	chr2	105157093	105733021	1.0216	1.14134	0.70266	0.824601	0.960691	0.848613	0.904879	0.908066	0.986345	0.948261	0.889692	0.836248	0.935456	0.913542	0.876064	1.20719	1.10089	1.15325	0.899656	0.813427	1.01433	0.935942	0.949526	1.0872	1.12338	0.841908	1.23192	1.06144	1.11285	1.17774	0.840177	0.901613	0.975751	0.825804	1.21768	1.48925	1.03564	0.797873	1.13755	1.21025	1.3376	1.06368	0.821343	0.747991	1.00769	1.16673
587	chr2	105733022	106261284	0.943184	1.15668	1.06131	0.883175	1.05039	0.985995	1.11617	1.2241	1.00427	1.01745	1.05607	1.03857	1.14719	0.887417	0.911199	1.13064	1.30365	0.925184	0.98098	1.44813	0.975781	1.05719	1.08171	1.2262	1.12597	1.3914	0.982652	1.25953	1.39165	0.741952	1.63534	1.26228	1.23578	0.87381	1.27077	1.34196	1.19462	1.05973	1.02316	0.975761	0.963567	1.07871	1.14465	1.12727	0.847448	1.29264
588	chr2	106261285	106829510	0.98161	0.971209	0.55121	0.846076	1.0152	0.990873	0.935078	1.0554	0.864774	1.24831	0.961842	1.31123	1.06569	0.735472	0.989955	0.706458	0.70093	1.21434	0.93324	0.726662	0.430885	1.0667	1.11255	0.990982	0.815666	0.969999	1.06339	1.30376	1.11965	1.08376	1.07329	0.901331	1.09264	1.53716	1.57704	1.22444	1.34036	1.10597	0.763202	1.12301	0.841174	0.892859	1.15108	0.943202	1.26301	0.677025
589	chr2	106829511	107372619	1.12811	1.28999	0.683888	0.748896	1.03142	0.697779	1.11205	1.03111	0.960864	1.06706	1.20286	0.636005	1.14793	1.22216	1.02934	0.943544	1.15572	1.33181	1.19852	1.34383	1.49365	0.936119	1.15708	0.720082	0.989727	1.02545	1.21026	0.960205	0.993335	1.0809	1.19924	0.937006	1.11369	1.01656	1.0482	1.01344	1.08206	1.0571	0.788644	0.823544	0.848183	1.08622	1.0446	1.26895	0.640253	1.24244
590	chr2	107372620	107966539	0.687349	1.22746	1.11253	1.02346	1.04053	1.11013	1.09786	0.990148	1.03874	1.10249	1.23492	0.801305	1.29824	1.20372	0.947812	0.798898	1.2119	1.0366	1.15462	1.25876	0.895487	1.15666	0.852831	0.896887	0.807022	0.880398	1.53578	1.57006	1.13571	0.927717	1.17289	1.00113	1.06069	1.16884	1.00774	1.11116	1.05635	1.31915	0.529743	1.01428	1.26642	1.33051	1.23449	1.12991	0.783714	0.973741
591	chr2	107966540	108548870	1.05938	1.04296	0.851472	1.28247	1.20509	0.839445	0.982712	1.07657	0.972545	0.806279	1.40055	1.04055	0.912944	0.894937	1.03686	0.830024	1.14129	1.36756	1.27499	1.02095	0.862557	0.999357	1.26362	0.793589	0.919402	0.940511	1.19773	0.887182	1.404	1.1607	0.866852	1.13713	1.21639	1.5179	0.760407	0.70096	1.00849	0.903738	0.821687	0.83286	0.804954	0.808368	0.9144	1.0482	1.4995	1.24671
592	chr2	108548871	109143853	1.10896	1.39261	0.983373	0.623266	0.957459	1.42996	1.12591	1.05488	0.918602	1.22927	0.669484	0.919638	1.0042	1.01256	1.26211	1.12253	1.5863	1.19515	0.883353	1.06439	0.816411	1.0623	1.20451	0.938745	1.15744	1.07423	0.906058	1.21089	1.21889	1.13313	0.829374	1.09822	1.0197	1.10281	1.25671	1.39814	1.07749	1.00762	1.16382	1.53886	1.25919	1.03149	0.861433	0.981612	0.82757	1.12928
593	chr2	109143854	109683166	1.23941	1.39149	1.07236	0.986475	1.47719	1.24156	1.13475	1.12697	1.05556	1.2287	1.19539	1.03114	1.05375	0.959643	1.07711	0.993499	1.04167	1.34605	1.04774	1.21945	1.31983	0.975215	0.840576	0.977704	1.17958	1.03572	1.11634	1.07425	0.926163	1.19329	0.915934	1.12781	1.48342	1.36997	0.847331	1.16098	0.956471	0.81	0.889297	0.953506	0.994357	0.899756	1.44326	0.795311	1.17756	0.957738
594	chr2	109683167	110364666	1.01242	1.11453	0.806537	1.15175	1.41519	0.891486	1.12051	0.981868	1.18658	1.4444	1.2333	0.860638	1.08226	1.06583	0.877312	1.26579	1.29842	1.15607	1.01528	0.904683	0.793218	1.10034	0.90083	0.535787	0.769657	0.974922	1.01916	0.865882	1.5476	0.761844	1.24018	1.22476	0.96043	1.56032	0.763591	1.20577	0.885669	0.994933	1.03157	0.82992	1.15376	0.816334	1.19384	1.03146	1.18479	1.2489
595	chr2	110364667	110790741	1.04449	0.844507	0.357418	1.07585	1.04817	0.57439	1.20724	0.826443	0.864769	0.890031	0.829509	0.969294	1.09424	1.06922	0.847444	1.74396	1.08518	1.31134	0.845159	0.942135	1.31758	0.960522	1.1537	0.937352	0.90115	0.913879	1.03815	0.765065	1.03832	1.16039	1.0885	0.968897	0.899495	0.790957	1.04085	1.41185	1.04228	1.22581	1.11245	0.935763	1.05993	0.788292	0.862198	0.815745	0.723418	0.779474
596	chr2	110790742	111228419	0.822537	0.852436	0.977485	0.462343	0.914847	1.07991	0.925638	1.07087	0.827343	1.45536	0.870878	0.966596	0.705374	1.18965	0.907136	0.969716	0.675011	1.24184	1.29339	1.0677	1.09341	0.996285	0.998594	1.24266	1.07774	0.882879	0.745816	0.991355	1.26817	1.08842	0.850854	1.23061	0.814212	1.41805	0.612458	0.715762	0.849168	1.04811	0.800298	1.01226	0.612906	0.952769	1.00278	0.652557	0.959941	1.41686
597	chr2	111228420	111664300	1.17838	1.16131	1.0092	1.13393	0.832852	1.13556	1.00956	1.12808	0.955503	1.16937	1.0237	1.0689	1.14998	1.27667	0.913919	1.3889	1.1606	1.25583	1.10406	1.00659	1.31861	1.02672	1.30001	1.16571	1.10689	1.14217	1.227	0.81159	1.10826	0.762561	1.12524	1.0011	1.06049	1.0907	1.03979	0.929975	1.08634	1.13137	0.80832	1.10188	0.941446	0.766147	0.960041	1.14925	1.06879	0.974798
598	chr2	111664301	112149833	0.613598	0.962655	0.975533	1.24433	1.0118	1.02992	0.820912	1.10688	0.919085	0.944367	0.734685	0.962449	1.00132	1.07658	0.985568	1.11093	1.10968	1.21635	0.91737	0.85556	1.24104	0.979169	1.51635	1.09819	0.991699	1.05999	1.16763	0.759566	1.10864	0.862361	0.832533	1.13021	0.813948	1.20768	0.973982	1.0849	1.01214	1.25819	0.733249	0.991493	1.1364	0.907438	1.04189	1.3828	0.784065	1.09812
599	chr2	112149834	112569814	1.1183	1.38875	0.678896	0.952251	0.986725	1.11845	1.21241	0.882475	0.937086	1.09946	1.31677	1.07589	1.13917	1.07115	0.928443	0.99176	1.33901	1.39014	1.17172	0.881307	1.2565	1.03058	0.929145	0.776486	0.897668	1.00743	1.14041	0.693745	1.14315	0.939202	1.11796	0.981528	0.809262	1.2701	0.805304	0.954805	1.02741	0.770405	0.792661	1.20136	1.25542	0.987319	1.0654	0.923612	0.947595	1.55083
600	chr2	112569815	113127312	0.827877	1.24027	0.884584	0.88288	1.01599	1.15525	0.955667	0.935854	0.949099	1.42545	1.16396	1.10123	1.19322	0.9815	1.1608	1.32183	0.889122	1.11561	0.813981	1.06394	1.04167	1.16089	0.881601	0.647878	0.739011	0.925857	1.01425	0.841275	0.89201	1.09293	0.592792	0.774093	0.596024	0.94149	0.958109	1.08974	1.02904	1.46835	0.608215	0.929801	0.786827	0.930107	0.922738	0.874846	1.00688	0.969412
601	chr2	113127313	113642012	0.638125	0.663093	0.935539	0.885649	1.03868	1.21963	1.0409	0.887287	0.891685	0.901638	1.16014	1.1467	0.871374	0.893704	1.03078	0.904216	1.39127	1.33292	0.983654	0.831984	1.12737	0.8005	0.811211	0.942417	0.87588	0.948005	0.936419	0.966575	1.0241	0.793334	0.754634	1.09813	0.666461	0.506859	0.944187	0.853721	0.713607	0.919413	0.954056	0.972038	1.43012	0.967212	1.26245	0.974481	0.854698	1.47933
602	chr2	113642013	114194598	0.989671	0.901991	0.865224	1.11804	1.20074	0.995434	1.01422	1.12301	0.878471	0.857553	1.29959	0.830807	0.973626	1.09138	0.973941	0.786005	1.31365	1.03456	1.13025	1.34581	1.27373	1.08078	0.978892	0.614024	0.973564	0.779398	1.14237	1.02315	1.14006	1.13827	1.38942	0.850153	0.890982	0.736007	1.09476	1.33465	1.11826	1.06412	0.893621	0.710311	1.09931	0.786292	0.873971	0.701685	1.12623	1.39479
603	chr2	114194599	114704318	0.932158	0.959979	0.652576	0.776067	1.12246	1.2028	1.00386	1.14852	0.915335	1.26834	1.17075	0.902906	1.1114	1.13091	1.13919	0.907129	1.05411	1.01266	1.2173	1.29066	1.19174	1.06641	0.916394	1.21398	1.12836	1.0819	1.01328	0.936323	1.02199	0.952797	1.157	1.06611	1.21162	1.44529	0.817243	1.24545	1.12765	1.41329	1.14074	0.865885	0.847141	0.644061	1.2913	1.0341	1.38777	0.960495
604	chr2	114704319	115271329	0.758442	1.3659	0.725529	1.30308	0.65741	0.923732	0.882826	0.826765	0.970924	0.955337	1.36944	0.924463	1.04695	0.926315	0.555952	1.22676	1.00226	1.1639	0.812762	1.15181	1.17922	1.05755	0.854935	0.886943	0.81431	1.09592	1.19767	0.928329	1.14043	1.36299	1.19247	0.971033	0.688403	1.03933	0.987206	1.24903	1.03603	1.26279	1.02347	1.02921	1.35515	0.97167	0.762484	0.939372	0.859197	1.0519
605	chr2	115271330	115868512	0.890962	1.12451	1.2334	1.09923	0.985569	1.22975	0.953447	1.22294	0.936077	0.727217	1.86134	1.01369	0.919423	0.891205	0.857071	1.0868	0.904317	1.38621	0.840632	1.00495	1.11608	1.15797	1.02796	0.825866	1.22205	0.958736	1.08613	1.05239	0.918056	0.946471	1.19104	1.10626	1.17411	0.969462	0.887084	0.91407	1.03055	1.25134	0.897696	0.904334	0.911769	1.06044	0.876393	1.06987	1.02794	0.987357
606	chr2	115868513	116515162	1.11952	1.19165	1.31982	1.11408	0.821449	1.15321	1.0144	1.16478	1.01404	0.741163	1.34149	0.777691	0.939719	0.958466	0.875882	1.24995	0.987974	1.22158	0.949254	1.14009	1.56772	0.918713	1.14298	0.693664	1.30726	0.999569	0.936227	1.17103	1.04793	0.739724	1.26386	0.863765	1.04098	1.56935	1.17281	1.11024	1.15557	1.10143	1.07601	1.30708	1.22027	1.24788	1.19645	0.895944	0.819662	1.08871
607	chr2	116515163	117191918	1.10694	1.02118	1.31825	0.764138	1.05834	1.05324	1.10021	1.20083	0.891461	1.0528	1.39728	0.741336	1.09785	0.93149	1.17922	1.1447	0.933433	1.56158	0.841871	1.28834	0.960106	0.984348	1.22403	0.93063	1.18697	1.10465	1.24766	1.10269	1.28157	1.4722	0.875248	0.999744	1.16331	1.33119	0.451337	1.08527	0.689225	1.24212	1.12147	1.04884	1.59483	1.22561	1.1063	0.881957	0.907778	0.880532
608	chr2	117191919	117839082	1.00943	0.889131	0.886738	1.15142	1.1109	0.709573	1.03392	1.31428	1.20826	0.984751	1.12125	0.822102	1.30493	1.10491	0.788581	1.118	1.25102	1.3008	1.08082	0.933308	1.02579	1.10438	1.07769	1.01857	0.978508	0.993718	1.28127	0.930454	0.996952	0.610141	1.32157	1.04203	1.0164	1.51848	1.35912	1.2679	1.36418	0.827206	1.07168	0.98802	0.875285	1.24938	0.988173	0.954675	0.893589	1.32285
609	chr2	117839083	118447120	0.990127	1.08674	0.823783	1.05387	1.08695	1.00916	1.07538	0.904296	0.960868	0.960174	1.16521	0.888999	1.02897	0.962438	1.18649	1.15872	0.998844	1.37994	1.01703	0.912967	1.16445	1.22296	1.13963	0.996584	0.878247	1.04754	1.07863	0.868959	0.951903	1.38397	1.21891	1.19817	0.930065	1.07695	1.46137	1.29017	0.947026	1.27609	0.830372	1.0928	1.15874	1.1381	1.15651	1.04782	1.00895	1.00871
610	chr2	118447121	119017500	1.02565	1.15293	1.39331	1.04295	0.826296	0.820845	1.15774	1.19157	1.09817	1.09931	1.06452	0.967023	1.11333	0.923847	0.890722	1.59227	0.992926	1.35855	0.918567	1.31999	1.17254	1.06803	1.10374	1.03571	1.09009	0.991886	1.23505	0.87424	1.07199	1.15684	1.09898	0.768497	1.31241	1.34334	1.26923	0.719399	1.29025	1.03917	0.934793	0.903369	1.08366	1.14842	0.913419	1.14942	1.00946	0.809954
611	chr2	119017501	119560105	1.19591	1.21365	1.04248	0.9864	0.875367	0.913471	0.96151	1.21914	1.15961	0.916231	0.908478	1.05342	0.819473	0.994422	1.0155	0.704954	1.04165	1.38378	1.00277	1.15291	1.1517	1.03528	1.34239	1.19276	1.11538	1.13662	0.9333	1.0972	0.877379	1.16356	1.11202	1.09811	1.12888	1.26969	1.13945	1.04248	0.902623	1.12608	1.18554	1.14786	1.34495	0.899662	1.01269	1.4552	1.24118	0.957512
612	chr2	119560106	120133584	1.12995	1.31547	0.988919	0.941378	0.903991	1.23303	1.2096	1.00666	1.09337	0.740553	0.90861	0.837872	0.931393	0.746092	0.88616	1.56157	0.709555	1.56945	0.796323	1.31219	1.02077	1.04838	1.21224	1.00876	0.830291	1.00598	1.00798	0.937042	0.79895	0.903694	1.1497	1.10498	0.88879	1.93321	0.851666	1.15122	0.781368	1.31478	1.29111	1.11002	0.999452	0.709899	0.915142	1.14261	1.02231	0.886939
613	chr2	120133585	120691116	1.03623	1.06064	1.3159	0.922344	0.721998	0.917619	0.986981	1.03532	0.867391	0.78735	0.978562	0.758907	1.08704	1.17087	0.904568	0.858469	0.842201	1.60106	1.08947	1.0968	1.57794	1.03759	1.25784	1.23753	0.847533	0.812741	0.87212	0.833988	0.985432	1.05561	1.45927	0.837968	1.17071	1.07141	0.851584	1.12923	0.92198	1.10748	0.892725	0.899792	1.21131	1.20124	0.721644	1.13554	0.78428	0.864165
614	chr2	120691117	121252446	1.0066	1.31706	1.458	1.2597	0.901539	1.11621	0.708487	1.12832	0.977897	1.05971	0.90529	0.793316	1.07102	0.800668	1.0695	1.07761	0.520199	1.66702	1.06028	1.47035	1.41936	1.1513	1.30004	1.18241	1.13369	1.0559	0.926231	1.18619	1.19782	1.01138	1.22537	1.31651	1.29248	1.15788	1.32238	1.21287	1.30227	1.28163	0.502337	0.884561	1.30518	1.22764	1.20333	1.05287	1.13537	0.898414
615	chr2	121252447	121773776	0.854765	0.693867	1.32072	1.08725	1.0705	1.1992	1.27703	0.919238	0.953993	1.06029	1.17502	0.879193	1.14154	0.961911	0.851204	1.08629	1.35257	1.94991	1.3144	0.965611	1.09599	0.950027	0.977323	0.998385	0.74752	1.13042	1.25315	0.796557	0.963694	1.00825	1.55601	0.760493	0.886876	0.985497	1.42914	0.912726	1.26784	0.946996	0.841474	1.09121	0.948963	1.18778	0.89305	1.11166	0.948768	1.3757
616	chr2	121773777	122302964	0.737894	1.03428	0.92693	0.610355	1.0155	0.952945	0.902112	0.910871	0.833275	1.1609	0.958846	0.644162	1.20572	1.09954	0.845665	0.666345	0.93728	1.64454	0.855114	1.22493	1.15057	1.04103	0.802338	0.82977	0.807387	0.994419	1.1562	1.05912	1.07827	1.33732	0.680356	1.10764	1.08031	2.16432	1.31879	1.1986	0.912139	0.99057	0.821165	1.12811	1.00818	0.841328	0.834706	0.894507	1.3364	0.850541
617	chr2	122302965	122874003	1.05268	0.891207	0.76323	0.65961	1.22516	1.54975	0.968124	0.94662	0.970212	0.693163	0.663607	1.18342	1.02657	1.01032	0.967301	1.13025	1.46059	1.27246	1.29375	1.27019	1.21721	1.03737	1.07086	0.768992	1.23079	1.09088	1.00247	0.506039	1.05837	1.23574	0.841239	0.888308	1.13423	1.54223	0.919532	0.753045	1.20151	0.892343	1.10819	1.02278	0.888423	0.989234	1.37425	1.01271	1.51077	0.923568
618	chr2	122874004	123441462	1.05144	1.19058	1.3991	1.32218	0.946829	1.33335	1.20749	0.847052	0.902634	0.740751	0.524975	1.1526	0.858724	1.06315	1.41643	0.932481	0.832492	1.27383	1.0563	1.34985	1.09669	0.990965	1.40151	0.784944	0.971025	1.2246	0.938889	0.919142	1.32113	1.15148	1.08373	0.924246	1.29399	0.72409	1.0993	0.870248	0.758287	1.01532	1.24387	0.919028	0.822655	1.15463	0.937717	1.14969	0.993718	1.31413
619	chr2	123441463	124063508	0.980388	1.2802	0.803505	1.05036	1.221	0.980055	1.14065	0.897517	0.856212	1.01293	0.867118	1.07026	0.814451	0.731776	1.12925	0.902945	0.801863	1.28923	0.815184	1.10849	1.40228	1.20706	1.22913	0.873581	0.738184	0.771416	1.12894	0.83869	1.5814	0.895299	1.17713	0.839413	1.13595	1.09213	1.03593	1.24085	1.23583	1.17734	0.910605	1.05847	1.13833	1.00874	0.738965	1.18767	1.74907	0.930299
620	chr2	124063509	124709236	0.852839	0.793414	0.836214	0.901609	1.43835	1.23938	0.963435	1.01193	0.939349	0.85949	0.878193	0.951614	0.99138	0.900942	1.19767	1.23551	0.801783	1.50793	0.783179	1.53657	1.11241	1.00834	1.05677	1.05646	1.05717	0.877014	1.16548	1.18878	0.797612	0.839755	1.10728	0.891749	0.702872	1.03967	1.24598	1.16903	0.76884	0.920078	0.878132	1.00346	1.22541	1.29276	0.817665	1.3673	1.41299	1.05308
621	chr2	124709237	125326406	0.720426	1.08513	1.12144	0.879247	0.732319	1.331	1.02672	1.09166	1.00488	1.20673	0.918589	1.29739	0.931573	1.10772	1.038	1.40755	1.39754	1.16653	1.01715	0.99437	0.876727	0.927682	1.17885	0.880295	1.0849	0.932663	1.01883	0.848575	1.16628	1.21496	1.25228	1.23976	1.16294	0.731077	0.872174	0.737053	0.811049	0.827787	1.06124	1.31774	0.806318	1.09472	0.948398	1.03317	1.52922	1.39593
622	chr2	125326407	125940962	0.840089	1.11753	0.748071	1.24199	1.25653	1.12028	0.889721	1.11395	1.10426	1.02211	1.15599	0.970213	1.04274	0.813869	1.00186	0.764436	1.26957	1.19357	1.09773	1.23824	0.993236	1.42195	0.890522	0.732958	0.897214	1.13712	1.30454	1.05601	1.32407	1.0811	1.08636	0.986771	1.10479	1.04737	1.32848	1.09666	1.36849	0.908562	0.983171	1.34662	0.936111	1.14005	1.22279	0.975868	1.49876	0.956867
623	chr2	125940963	126582813	0.999971	1.39551	0.80153	1.03478	0.738559	1.1172	0.916902	1.04393	1.04273	1.16106	1.14669	1.13642	0.847914	0.763598	0.859516	1.209	1.04079	0.855031	1.07476	0.907867	0.787237	0.919609	0.927563	0.898088	1.3376	1.16825	1.07774	1.42275	1.07043	0.808892	0.843902	0.88985	0.831578	1.46853	0.932638	1.25375	1.05278	1.24407	0.905471	1.05987	0.982118	0.895321	0.805387	1.25019	1.08097	0.800018
624	chr2	126582814	127221537	1.1275	1.00431	1.14201	0.830667	0.743127	0.799221	1.18296	1.02289	1.01285	1.30924	0.937636	0.964265	1.01872	0.801401	1.09674	1.39946	1.74388	1.00531	1.23076	1.08341	0.938366	1.24324	1.27684	0.819636	1.01821	0.959991	1.12328	0.985161	1.24892	1.01832	1.23729	1.01467	1.23036	1.41256	0.961739	1.55976	0.754078	1.36745	0.796538	1.61105	1.19124	1.22939	1.28638	1.116	0.893764	1.03863
625	chr2	127221538	127750413	1.17153	1.06634	1.03009	0.791957	1.48182	0.688132	1.09632	1.08556	0.95921	1.2442	0.732866	0.900589	1.12112	0.922562	0.994234	1.15755	1.04612	1.10976	1.00463	1.34401	1.29456	0.913672	0.971141	1.44517	1.49597	1.07432	1.39584	0.91262	1.65337	1.23187	1.1844	1.26636	1.12869	1.12265	0.912492	1.38862	1.15916	1.2093	1.10996	1.21977	1.48764	1.14976	1.07924	1.11152	1.24914	1.23169
626	chr2	127750414	128290847	1.15557	0.958024	0.874805	1.73735	1.1651	1.04341	1.07519	0.89103	0.900284	0.821247	1.03771	1.02753	1.01896	1.0136	0.967555	0.753991	1.04195	1.36735	0.889299	1.12801	1.57755	1.0288	1.30095	0.924263	1.08008	1.05621	1.11816	1.239	0.843838	1.44446	1.30422	1.0642	0.719596	1.20174	1.0953	1.3607	0.918324	1.11348	0.736066	1.31457	1.18432	0.954347	1.23147	1.0009	0.947547	0.762567
627	chr2	128290848	128855975	1.20057	0.99145	0.951213	0.611366	1.61596	1.1616	1.19692	1.01332	0.943388	0.912212	0.859412	0.978716	1.01752	0.693824	1.15749	1.25941	1.05197	1.27155	0.960375	0.991725	0.972573	0.881305	1.24717	0.76554	1.01277	1.06335	1.00999	1.37125	1.35223	0.848539	0.691546	0.872718	1.01619	1.21386	0.983526	1.82279	1.20003	0.889075	0.807414	1.33996	0.816901	0.582393	0.962372	0.975845	0.604198	1.21174
628	chr2	128855976	129393203	1.08733	0.923948	0.808076	1.10896	0.599756	0.651856	0.955328	0.839588	0.906743	0.82814	0.756946	0.726897	0.869653	1.11379	0.817892	1.22524	1.08135	1.21583	1.21172	0.997553	0.863292	0.960916	1.08463	0.866996	1.08249	0.758259	1.05408	1.19838	0.922561	1.25886	0.742859	0.958412	0.970796	1.71792	1.03364	0.832516	0.978225	1.10405	0.808988	0.907962	0.925442	1.17508	1.09739	0.889495	0.764092	1.05116
629	chr2	129393204	129999158	0.852085	0.958472	0.844504	1.07739	0.977559	0.70779	0.892074	0.74773	0.883412	1.0666	1.13479	1.06345	0.809258	0.878006	0.834679	0.778264	0.681709	1.30099	0.974371	0.941726	1.05178	0.987462	1.1947	0.957452	1.17602	0.985479	1.02049	1.03021	1.15776	1.47638	0.895176	1.02487	0.891094	1.12974	0.927316	0.885709	1.02367	0.692712	0.859428	0.929667	1.19711	0.859632	0.720076	0.866553	1.08883	1.05241
630	chr2	129999159	130586390	0.992913	0.978988	1.34242	0.564353	0.700135	0.777558	1.01606	0.938537	0.881112	0.897726	0.555322	0.913164	0.988732	1.05752	1.30232	0.982159	1.08689	1.0938	0.834814	0.983607	0.718115	1.08563	0.902078	0.975661	1.32916	0.834133	0.941165	0.730019	1.00793	0.995204	1.55288	0.803494	0.763914	1.11893	0.767271	1.60323	1.0061	1.13675	0.861826	0.915196	0.690535	0.889079	0.955801	0.992946	1.48565	1.23617
631	chr2	130586391	131165368	1.24625	0.942537	1.55666	0.865207	0.940258	1.05997	1.23947	0.940949	1.01974	1.88193	0.801497	1.06224	1.2753	1.1366	0.970143	1.04475	1.13096	1.49676	1.04517	0.866395	1.23695	1.06763	0.800326	1.14502	1.24652	1.1815	1.089	1.55092	0.944589	0.947726	0.836807	1.6177	0.744746	1.13703	0.943257	0.964271	0.906866	1.10076	1.47277	1.05029	0.947887	0.880112	1.31708	1.08799	0.674397	1.21604
632	chr2	131165369	131648763	1.24799	1.23662	0.846805	1.18251	1.05355	0.970284	1.14077	1.01161	0.99819	1.33211	0.800662	0.886583	1.39258	1.24685	1.03787	1.29065	1.24731	1.24347	1.02315	0.827777	0.987215	0.97666	1.18228	1.09052	1.20709	0.957003	0.958531	0.835602	1.28957	0.67395	1.00072	1.29823	0.889393	0.724528	0.851614	1.07798	1.20636	1.16973	0.892473	1.06977	1.08832	1.26095	1.20584	0.970204	0.988639	1.10365
633	chr2	131648764	132242678	0.985239	0.74678	1.24246	0.974451	0.902301	1.11948	1.0342	0.85963	0.919316	1.3232	1.11827	1.32855	1.14544	1.03622	1.12829	1.1212	1.60221	1.21399	1.10476	0.915432	1.50138	0.949003	1.22344	1.06837	1.3912	0.887841	1.10281	1.33738	1.12265	1.41158	1.18311	1.09148	1.01269	1.61303	1.21584	1.02564	1.19524	1.07431	1.00703	1.19111	0.772127	1.216	0.869668	0.922493	0.958387	1.21138
634	chr2	132242679	132813952	1.03606	1.00802	0.616757	0.925979	0.688754	1.53917	0.99719	1.13681	1.0131	1.07098	0.986742	1.1214	1.00696	1.36121	1.5728	1.22642	0.731834	1.14947	1.03768	0.713272	1.31336	1.07824	0.854531	1.09583	1.43659	1.02413	1.14707	1.06118	1.16873	1.57866	0.943917	1.19805	1.2497	1.60427	0.891519	1.19202	1.11105	0.791563	0.72411	1.00737	1.0494	0.992434	1.10126	0.739741	0.89495	0.752209
635	chr2	132813953	133329190	0.818957	0.800667	1.02685	0.98269	1.03708	1.35411	0.903679	0.99959	0.888765	1.24037	0.900324	0.982792	0.991897	1.24247	1.1969	0.957603	0.846876	1.11762	0.752004	0.802064	1.67014	1.07986	1.01846	0.900319	1.14315	1.0366	1.05418	0.832727	0.883133	1.01221	0.865098	1.0592	1.07054	1.75991	1.32513	0.658474	0.829502	1.14715	0.732689	1.18246	0.815041	1.38005	1.3989	0.818644	1.00767	0.876216
636	chr2	133329191	133879163	0.780571	0.727913	1.18134	1.42753	1.11661	0.927848	1.01934	0.933151	0.951577	0.852773	1.09155	1.1183	0.997418	0.753655	1.05517	1.00685	0.952167	1.1481	1.14672	0.842093	1.19085	1.06203	0.917079	1.3221	0.994503	0.826284	0.861196	0.852474	1.25581	0.556066	0.910122	1.26262	0.844949	1.02029	1.13241	0.547591	0.938778	1.08324	1.15616	1.34136	1.11154	1.15705	0.986439	0.77478	0.957515	1.14723
637	chr2	133879164	134451962	0.869691	0.929398	0.862423	1.2182	1.12146	0.934273	0.853331	0.967215	1.10603	0.852165	0.812525	1.02837	1.05092	1.06178	0.99899	1.69317	1.136	1.03135	1.21086	1.06367	1.22056	1.04097	1.39207	0.977045	1.01056	0.919775	0.941725	0.938761	1.1932	1.16562	0.891049	0.919747	1.25553	0.968423	0.70047	1.1365	0.970779	1.14557	0.954593	1.18186	0.69806	0.766897	1.03538	1.08221	0.85887	1.01666
638	chr2	134451963	135013951	1.03458	1.20708	0.830522	0.856129	0.838266	0.863868	1.02681	1.09339	1.04128	1.03548	0.992199	0.908238	0.989613	1.05526	1.20999	1.11467	1.11097	0.884058	0.744179	1.10274	0.862087	1.24562	0.938103	0.909245	0.929725	1.03857	1.01906	1.0484	1.16268	1.29238	0.910624	1.45467	0.938745	0.699146	1.00616	1.03696	1.24369	0.819128	1.01346	1.01266	1.0342	1.08032	1.00599	0.995213	1.12843	1.01098
639	chr2	135013952	135582542	1.33774	0.796414	0.998075	1.11728	0.794195	1.08389	0.906637	0.936434	0.97924	0.747856	1.47276	1.34445	1.2336	1.13596	1.1502	0.831129	0.688127	1.14781	1.0263	0.859495	1.12536	1.14398	1.14462	0.909633	0.973689	0.975069	1.10299	1.03012	1.51872	0.833676	1.03052	0.769053	0.90913	1.39674	0.907126	1.41434	1.20794	1.13943	0.953554	1.11784	1.3254	1.38177	1.17051	1.50121	0.814465	1.06959
640	chr2	135582543	136201080	1.03899	0.996283	0.882605	0.775426	1.28027	0.948417	1.1358	0.946674	0.934111	1.48948	0.963762	0.839257	0.981864	1.0075	0.952068	0.670268	1.18333	1.26587	0.953513	1.13686	0.871234	1.11958	1.10765	1.13061	0.939236	0.940534	0.942908	1.23038	0.764283	1.09178	1.34893	1.43713	1.2491	1.01433	0.798309	1.13885	1.08694	0.794032	0.837875	1.23628	1.01386	1.02896	1.25517	1.05975	1.4652	0.892812
641	chr2	136201081	136783721	0.978571	0.925722	1.0508	0.863598	0.940231	1.27407	1.08642	1.17673	0.978907	1.37327	1.1514	0.874869	1.05394	0.732021	1.10635	0.837433	1.00167	1.24368	1.11235	1.01837	0.719433	0.957411	1.14978	1.6185	0.899151	0.802571	0.999982	1.31881	1.08038	1.20847	0.931395	1.06724	1.29001	0.86209	0.783284	0.963929	1.42507	1.20229	0.882437	1.07235	0.947766	0.881623	0.851377	0.992789	1.02992	0.904691
642	chr2	136783722	137353545	1.04297	1.1373	0.978488	1.18491	1.39028	0.635353	0.806327	0.964542	0.95342	0.869996	0.567365	0.944419	0.81978	1.0439	0.948666	0.736544	1.23582	1.28364	0.89395	0.888796	1.40935	0.99287	1.27031	0.79993	1.35682	0.854686	1.03615	1.06399	0.933373	0.794591	0.953486	0.698283	0.827286	0.981053	0.88715	1.34657	1.0101	0.964628	0.798165	0.969023	1.16762	1.33915	0.811959	1.18922	0.846204	1.46599
643	chr2	137353546	137960274	1.16081	1.14442	0.558454	1.06736	0.987059	0.858508	0.944761	0.922829	0.907442	0.91679	0.782553	0.892086	0.762479	1.08313	1.11321	1.16154	0.708694	1.32505	0.845447	1.08296	0.448729	1.20627	0.981177	1.22489	0.667569	0.856823	1.05557	1.02748	0.86849	0.9189	1.20996	0.703739	0.907709	1.11031	0.752835	1.31186	1.12681	0.938044	1.04772	0.832203	1.29844	0.928642	1.55934	0.921985	1.42897	0.801333
644	chr2	137960275	138599213	1.10108	1.07464	1.01683	1.08922	0.662937	0.961017	0.865739	1.10677	0.944793	0.746557	0.877317	1.04154	1.19455	1.13199	0.896683	1.20278	0.89962	1.12323	0.897673	1.07575	1.39911	1.1033	0.957276	0.650107	1.11159	0.961272	1.0361	0.689948	1.29813	1.18195	0.786184	1.04734	1.38736	0.963372	1.08001	1.31095	1.04345	0.91808	1.22645	1.18015	0.870774	1.03872	1.268	0.829601	0.847077	1.09096
645	chr2	138599214	139194499	0.962338	0.98272	1.18627	1.15051	0.993242	1.03222	1.07849	0.871941	0.926389	0.906761	1.47263	0.844063	1.0599	1.02622	0.855525	0.736306	1.12831	0.932566	0.832124	1.05807	0.889042	1.03971	1.15875	0.914434	0.595031	0.913423	1.19748	1.06417	1.59132	0.789002	0.952535	0.802887	1.16582	1.11142	1.27157	1.22723	1.00705	0.883591	1.09259	1.30224	0.937216	1.43848	1.02293	0.823876	1.39445	1.05627
646	chr2	139194500	139786267	1.04188	1.12003	1.44626	1.33904	1.22801	1.24254	1.15161	1.20237	0.857639	1.17434	0.991253	1.07954	1.26291	0.877704	0.936261	1.05416	1.28504	1.14774	1.04597	1.07168	0.931874	1.07427	1.35033	1.09878	1.28838	0.886909	1.32119	1.00767	0.939428	1.32461	0.903272	0.959934	1.26072	1.13004	0.887898	1.05042	1.01108	1.0571	0.698873	1.07092	1.19394	1.00938	0.954321	1.07777	1.21809	1.23669
647	chr2	139786268	140401708	0.97682	0.877891	1.28841	0.69192	0.811428	1.06223	1.09508	1.23876	0.995197	1.01794	1.09541	0.922149	0.952793	0.918326	1.09208	0.926212	1.07304	1.0501	1.22229	1.05804	1.26891	1.06293	1.08549	0.863684	1.06232	1.06885	1.08722	1.05637	1.21542	0.912528	0.923988	1.0327	0.89531	1.43319	1.21787	1.43529	1.0766	1.10713	0.679051	0.759642	0.970682	1.02455	1.08639	0.968529	0.942518	1.02681
648	chr2	140401709	141029098	1.14123	1.10753	0.660118	1.28612	0.781785	0.742209	0.919533	1.06815	1.09002	1.00059	1.0989	1.10207	1.16975	0.799672	0.94323	1.3599	0.895624	1.09163	1.26991	0.870413	0.660743	0.793585	1.06532	0.831661	1.27509	1.12129	1.13415	0.87574	1.04974	1.17745	0.821724	1.21481	0.784548	1.16123	1.13612	1.36871	0.672212	1.2261	0.638416	1.01748	0.860791	1.26339	1.19026	1.12338	0.947327	1.26108
649	chr2	141029099	141677408	0.945874	0.956319	0.763927	0.933643	1.05337	0.689088	1.05062	0.923112	0.914667	0.973066	1.18803	1.01558	1.05688	1.02474	0.997622	1.1581	0.892114	0.937239	1.13231	1.12073	1.03681	1.00323	1.11765	0.680658	0.874712	0.965065	1.17341	0.782383	1.17573	1.29276	0.835183	0.680265	1.04497	1.28388	0.829953	0.805594	0.850364	1.09594	1.31185	0.898393	1.0593	0.985773	1.12661	0.805363	0.730521	1.19444
650	chr2	141677409	142317290	1.10637	1.36573	0.778128	1.12013	1.20439	0.790682	1.13486	0.87481	1.02701	1.14001	1.15616	1.32878	1.07531	0.813951	0.95707	1.43683	1.37711	1.05737	0.958639	0.994656	0.970318	1.09879	1.17174	1.12653	1.26426	0.754089	1.17394	0.775798	1.01664	0.665287	1.1079	0.837312	0.934866	1.20612	1.13503	0.984844	0.879	0.889719	0.759732	0.904314	1.05316	1.12246	1.14966	1.05594	1.15551	1.1165
651	chr2	142317291	142934201	0.892903	1.08891	1.17781	0.65867	1.34948	0.841269	0.99326	1.12948	0.914839	1.19769	0.892848	0.785032	1.02411	1.10304	0.868998	1.04731	1.41635	1.00644	0.954135	0.584078	0.486736	1.0395	1.21632	0.927836	0.835695	1.00085	0.959097	1.0693	0.935185	1.29065	1.01578	1.22436	0.625032	1.67361	0.932849	1.19006	1.16473	1.01489	0.616494	1.1358	1.60674	1.16001	1.13553	1.10573	0.729077	0.935827
652	chr2	142934202	143577326	1.09405	0.978285	1.5327	0.859993	1.33718	0.823216	1.01325	1.04721	1.07759	1.08821	1.11792	0.951083	1.04457	0.783157	0.981387	0.823143	1.28636	1.05947	0.824456	1.30841	0.81352	0.87584	1.41683	1.03014	0.834245	1.00357	1.02258	1.05682	1.32192	1.0887	0.9668	0.74196	0.810233	1.19383	1.50272	1.55272	1.23107	1.06827	0.792585	1.10458	0.750174	0.900165	0.972324	1.15718	1.28293	1.0478
653	chr2	143577327	144158111	0.83407	1.05492	1.09347	1.05827	0.866144	1.35075	1.05769	1.04049	1.07489	0.733827	0.741768	0.904312	1.05291	0.930247	1.19153	1.42256	0.757998	1.00658	0.705864	1.05492	0.782841	1.1391	1.18196	0.909977	0.93197	0.970799	0.966479	1.05039	1.28175	0.858581	1.11743	1.0886	1.16169	1.76906	1.34354	0.950749	0.928571	0.880257	0.913242	1.22125	0.940334	0.953223	1.45662	1.00646	0.846146	0.987317
654	chr2	144158112	144712970	0.964372	0.913082	0.904228	1.23866	1.16282	0.960869	0.915138	1.28966	0.960153	0.892314	1.47278	0.691617	1.1555	0.699381	1.2472	1.14729	1.05731	1.22569	0.844245	0.875831	0.7922	0.950233	0.996456	0.893778	1.12391	1.00822	1.15538	0.934866	1.09289	0.957982	1.08908	0.903637	0.956941	1.18418	1.16768	1.25716	1.0378	0.982597	0.987306	1.08234	0.922324	1.13612	0.749131	0.893537	0.920287	0.933112
655	chr2	144712971	145266648	0.842486	1.12115	0.972053	0.96114	1.15706	0.710573	0.984468	1.05231	0.925857	0.984725	1.1465	1.4022	0.873098	0.888537	1.05269	0.938327	0.822701	1.97581	1.23085	1.16036	1.08833	1.10872	1.34122	0.893842	0.830112	1.09794	1.02548	0.666345	1.07754	0.866254	1.16079	0.80261	1.2343	1.37879	1.21635	0.963499	1.10746	1.09592	0.861442	1.12281	1.02952	0.784648	1.17825	1.07585	1.06684	0.92229
656	chr2	145266649	145814222	0.962388	1.23242	1.03982	1.0619	1.18298	1.17422	1.15563	1.07733	0.910366	1.11377	0.739807	0.924046	1.14727	0.867131	0.997403	1.15545	1.20257	1.33095	0.759383	1.0521	1.03304	1.18628	1.1841	0.943244	0.803959	0.871746	1.2356	1.19348	1.2871	1.25035	0.996855	0.946723	0.998531	1.15601	1.03665	0.73879	1.15439	0.99313	0.985595	1.12445	0.895345	0.897291	0.838366	1.0172	0.870174	0.973052
657	chr2	145814223	146384648	0.89538	0.863533	1.16756	0.789435	1.13994	1.13082	0.921236	0.946628	0.914855	1.2973	0.999964	1.03403	0.819014	1.19078	0.801267	1.20451	1.09073	1.35351	0.986537	1.20283	0.936115	1.06983	0.870471	0.894093	0.852177	0.916189	0.877237	0.922554	1.06429	1.11872	1.10988	1.08731	0.804904	1.12565	0.79023	0.762102	1.08001	1.12485	1.05484	0.873041	1.30796	0.896008	0.811125	0.831054	0.813052	0.836231
658	chr2	146384649	146990645	0.924822	0.886687	0.784145	1.15033	1.16515	0.996965	0.745023	1.02713	0.98893	0.72133	0.58938	1.09473	1.05173	0.945	0.831493	1.16186	0.809987	1.20478	0.903758	0.829849	0.823959	1.07471	0.934179	0.905967	1.22769	0.942996	1.02806	1.08127	1.20559	1.50336	1.02622	0.945798	0.854386	1.20152	0.758384	1.0148	1.07371	1.38669	0.736191	0.823807	1.15494	1.19281	0.689583	1.1875	0.85256	0.740455
659	chr2	146990646	147625670	0.874234	1.20504	0.688872	0.650413	0.682334	1.27066	0.782402	0.931149	0.921987	1.34894	0.949873	0.991643	1.02119	0.868196	0.953735	0.814024	1.07152	1.28763	0.964249	0.91235	1.09219	1.10081	1.05337	0.939762	0.793808	0.896605	0.874308	0.901672	1.01329	1.29998	0.727563	0.866952	0.998286	0.914667	0.725832	1.27226	0.821786	1.06068	1.00453	0.658373	1.04929	0.789504	1.13237	0.9633	1.44575	0.902607
660	chr2	147625671	148217403	1.07513	1.10102	0.636733	0.684408	1.18858	0.64649	1.15679	1.05845	0.943494	0.926502	1.23413	0.975721	0.939888	0.692636	1.14881	1.12166	0.785925	1.48716	0.888663	0.766556	0.891095	0.880547	0.797603	0.848407	0.841399	0.817506	1.03712	1.08006	1.08059	1.28975	0.955631	0.98261	1.19718	0.758678	0.830504	1.16505	0.781449	0.874174	0.672548	0.953192	0.911937	0.688757	0.796402	1.12168	1.08512	1.19286
661	chr2	148217404	148815487	0.762005	1.42326	1.05049	0.843781	1.16333	1.0253	1.07446	1.17552	0.992684	0.982946	1.18901	0.705372	1.11562	0.98881	0.937902	1.0924	1.12614	1.20218	0.834211	1.27647	0.979116	0.932004	1.12108	0.847738	1.24191	0.983299	1.12315	0.973945	0.712165	0.850836	0.690796	0.866488	0.907711	0.991115	1.07061	1.27044	0.842997	1.06041	0.932156	0.765444	1.18734	0.935664	0.84459	1.01039	0.993476	1.26974
662	chr2	148815488	149433742	1.05261	1.13611	1.15274	1.45407	1.30623	0.900892	0.930432	1.02704	0.949703	1.20184	1.03133	1.45988	1.14993	1.00676	1.31028	1.25917	0.884294	1.38326	1.02727	1.08178	0.565283	1.0284	0.857936	0.867051	0.766319	1.03133	0.96749	1.19412	1.14924	1.40546	0.818621	0.888786	0.699789	1.196	0.868255	1.36192	1.09914	0.754576	1.18258	0.606499	1.10281	1.05324	0.813754	1.18373	1.08852	0.991663
663	chr2	149433743	150075732	0.558052	1.17698	0.630999	0.815703	1.32556	0.953386	1.05409	0.971941	0.857683	0.817986	0.961585	1.08083	1.01992	1.11451	0.918939	0.698862	0.812676	1.71748	0.904971	0.857267	0.672025	1.15279	1.27015	0.798741	1.49764	0.994155	0.994997	0.865093	1.13108	0.628269	1.16492	1.49807	1.38375	1.17871	0.728458	1.22422	1.17409	1.1257	0.836843	1.11854	0.951438	1.20425	0.788665	1.23858	0.972832	1.48065
664	chr2	150075733	150640794	1.15113	1.32175	1.14347	1.09019	1.09788	1.11673	0.908207	0.990358	1.13967	1.17109	0.941289	1.48439	1.25954	0.892543	1.19388	1.30091	0.999271	1.30575	1.18986	1.08985	1.04726	1.1009	1.08422	0.996256	1.22106	0.872699	1.26485	1.00855	1.00962	0.559281	0.744709	0.687296	1.10164	0.958039	1.11412	1.04839	0.962891	0.918392	1.18014	0.987438	1.07249	1.32042	0.90052	1.0419	1.11668	1.00291
665	chr2	150640795	151247288	0.93254	1.0204	1.4692	0.779857	0.822964	1.04541	0.974108	1.11027	1.12039	1.37575	0.587528	0.964335	1.08927	1.13967	0.989411	1.09751	1.09243	0.989801	0.763907	1.07261	1.03874	1.11796	1.22705	1.03747	0.891013	1.00586	0.960381	0.686868	1.29368	1.09585	0.840986	0.93628	0.768116	1.34154	0.916139	1.25501	1.06335	1.16369	0.725972	1.2374	1.20517	0.918022	1.0584	1.19402	1.14787	0.615196
666	chr2	151247289	151796735	0.684751	1.65362	1.03389	1.42669	1.30711	0.690018	1.15587	0.99884	1.02981	0.981278	1.06111	0.897701	0.87007	1.15354	0.723689	1.12724	0.807651	1.33907	0.909651	0.953384	1.34994	0.963939	1.0398	0.930417	1.2384	0.923139	0.778914	1.10804	1.10766	0.835814	0.875723	0.894787	0.837635	1.12786	0.959575	1.15213	1.01101	0.780548	0.558977	0.89613	1.35977	1.26713	1.4571	1.18419	1.43816	0.579065
667	chr2	151796736	152365098	1.42877	1.09431	0.927701	0.691386	1.05794	0.789443	0.799492	1.02731	0.901881	1.05585	1.16206	0.967141	1.32722	0.846554	0.877411	1.07956	0.794966	1.67538	1.01578	0.991722	1.0769	0.813905	0.835342	0.877288	1.05903	0.903851	1.02251	1.21471	0.944471	0.67704	1.13254	0.999497	1.31888	1.29568	0.932305	1.10914	0.988751	0.756189	0.697194	0.950596	1.39276	1.42607	1.05768	0.984029	0.938299	0.727854
668	chr2	152365099	152924203	0.848185	0.806581	0.897488	1.59006	0.985048	0.920674	0.998229	0.761156	0.936028	0.83732	0.909493	1.061	0.960122	0.877899	0.740884	0.549376	0.710824	1.59848	0.991114	1.2212	1.03916	0.904105	0.904195	1.17532	1.00134	0.88986	1.20124	1.11481	1.27033	0.831257	0.748196	1.00998	1.21182	1.00398	0.791166	1.06812	1.06184	1.24543	1.05789	0.885712	0.949406	1.11217	0.917907	0.932414	0.701086	0.948382
669	chr2	152924204	153482704	1.00181	1.10578	1.04085	1.44876	0.874685	0.854177	0.962381	0.873199	1.02742	0.818875	0.851629	0.634389	0.957177	1.15392	0.885166	0.814372	0.85102	1.51637	1.00732	0.917144	1.064	1.16709	1.18047	1.0916	1.04945	1.04945	1.01922	1.19212	1.0632	1.13431	0.885724	0.832718	1.07948	1.01342	1.02667	1.09423	0.645686	0.721468	0.846601	1.22959	1.29645	1.39868	0.935921	1.18074	1.02026	0.863982
670	chr2	153482705	154067730	1.10477	0.954139	1.23693	0.927812	1.08804	1.62311	0.832328	1.01906	1.03847	0.735943	1.12968	1.10695	0.85257	1.14998	0.964865	1.07729	0.954779	1.3338	0.945206	1.2678	1.22642	0.891141	1.24734	0.886581	0.963011	0.860119	1.24653	0.921973	0.891367	1.15915	1.1403	0.781496	1.10324	1.6276	0.847568	1.25989	1.35088	1.16688	1.36837	1.27461	0.939552	1.1046	1.03202	0.84019	0.81682	1.05989
671	chr2	154067731	154689401	0.822005	1.11383	1.27151	0.909867	1.1144	0.789551	1.02803	0.914447	0.908806	1.11443	1.07787	0.963055	1.32006	1.12158	1.07619	1.16391	1.1651	1.75144	1.02877	0.904792	0.938379	1.0107	1.48382	0.895747	1.03039	0.84301	1.24163	1.02701	0.932121	1.0086	1.07226	0.437175	1.28825	1.15653	0.945557	1.20864	1.03803	0.987541	0.720518	1.14746	0.695718	1.2701	0.923937	1.08398	0.575576	0.937158
672	chr2	154689402	155324219	0.95507	1.3251	1.03177	0.93129	0.861065	0.913185	1.17224	1.13251	0.888417	0.939991	0.90278	0.755611	0.913613	0.866664	0.865564	0.756665	1.25569	1.49103	1.01767	1.02496	0.765096	0.952487	1.40142	0.641435	0.936919	1.10676	1.01289	0.656239	0.978642	1.04168	1.05842	0.8233	1.21082	1.38603	0.782902	1.45572	1.0124	0.998631	0.8871	1.30042	1.27446	0.960136	0.507618	1.00432	1.10142	1.38814
673	chr2	155324220	155957917	1.46533	1.05089	0.916159	1.47827	1.27946	0.762279	1.00478	1.09126	1.01054	1.26088	0.773436	0.818391	0.919934	1.075	1.06655	0.975812	0.721371	1.35986	0.9404	0.933258	0.541719	1.04805	0.929451	0.996202	0.915292	1.21763	0.976293	0.923748	1.07739	0.878377	0.818649	0.888779	0.962046	1.09611	1.37241	1.18024	0.958514	0.947984	1.11567	0.919481	0.870615	1.28922	0.739776	1.06692	0.896459	1.25022
674	chr2	155957918	156581214	0.739262	1.01977	1.14747	0.79476	1.36711	1.26552	0.998375	1.04008	1.10613	0.980372	1.15832	1.1107	1.03944	1.27502	1.01465	1.36108	0.999864	1.31595	0.999492	0.797756	1.07863	1.07584	0.967747	0.822567	1.0194	1.26679	1.05863	1.36946	1.36698	1.34303	0.846936	1.03424	1.10798	0.634995	0.794116	1.30851	0.996809	0.932452	0.817078	1.10607	1.03986	0.948739	0.647819	1.06762	1.12961	1.00459
675	chr2	156581215	157185678	0.853259	1.28141	1.20287	0.675017	1.35086	0.978851	0.99408	0.954407	0.958755	0.921837	0.959796	1.08309	1.16435	0.864733	1.34358	1.03742	0.568014	1.51357	1.05804	0.842935	0.738604	1.11251	1.16927	1.14853	1.2286	1.14838	1.03437	1.19232	1.12313	0.77672	0.897154	0.916499	1.16104	0.997716	1.18614	1.09874	0.963135	0.936775	0.827444	0.967727	1.12669	0.86559	0.922009	0.927956	0.786577	0.891104
676	chr2	157185679	157788539	1.21344	0.85804	0.953124	0.912085	1.87055	1.23748	1.25243	0.933147	1.00056	0.662159	0.523567	1.09603	0.959674	1.12294	1.18476	1.26387	1.41374	1.6379	0.80185	1.11234	0.83498	0.9319	1.16349	1.25534	0.948824	0.88143	1.19105	1.08121	0.972624	0.96321	0.96434	0.876964	1.27821	1.02483	1.04377	1.39178	1.1967	0.796894	0.916676	0.876771	0.984188	1.62154	0.672864	1.05718	0.862696	1.26035
677	chr2	157788540	158360473	0.820267	1.21882	0.986285	0.772889	1.02792	0.990634	1.0024	0.915203	1.10214	0.665381	0.811245	0.902948	1.03299	0.816671	1.134	0.781875	1.0882	1.72988	0.947371	1.20119	0.869213	1.0813	1.01594	0.720961	0.995507	0.799859	0.860842	0.698144	1.24047	1.39755	0.952459	0.562262	1.02529	1.13106	0.952538	1.07738	0.851124	0.880668	0.872962	0.79622	0.838333	1.15107	0.64111	1.05317	1.22317	1.18878
678	chr2	158360474	158939760	1.4383	0.804285	0.701315	0.837878	1.23676	1.26523	1.14967	1.00468	0.950878	1.13216	1.006	0.907765	1.03976	0.818713	0.973238	0.719689	0.788191	1.51148	0.752313	1.14992	0.623227	1.00526	1.02221	0.665816	0.983976	0.853277	0.835884	0.875966	1.07911	0.993969	0.781963	0.919032	0.938093	1.15559	0.999202	1.16278	0.804817	1.02268	0.811602	1.0184	0.746222	1.16379	1.37215	1.12141	1.26366	0.934327
679	chr2	158939761	159520812	0.74178	1.07659	0.960935	0.68849	1.00355	0.969149	0.941292	0.894108	1.07795	0.786757	0.818553	1.05383	1.01694	0.740726	1.02804	1.21282	1.05323	1.86585	0.93033	1.1011	0.821112	0.872365	1.09635	1.09561	0.984297	1.08016	1.18333	1.05805	0.821327	1.29605	1.15337	0.736422	1.14293	0.786623	0.985837	0.992499	0.999507	0.894729	1.0746	0.915991	0.572306	1.00721	1.05778	0.86506	0.784934	0.906386
680	chr2	159520813	160050929	0.911853	0.934297	0.665411	0.871285	1.1114	1.1315	0.85935	0.893079	1.0154	0.907724	1.32707	1.03044	0.973252	0.912458	1.10077	1.21508	1.24439	1.67057	1.07395	0.936787	0.961733	1.04647	0.778475	1.11601	0.787841	1.12346	1.1223	1.11091	1.47525	1.47736	0.902499	0.655237	0.96675	0.94309	1.14452	1.43533	0.941255	0.782324	1.04714	0.682041	0.718459	1.29392	1.01077	0.823359	0.70766	0.820834
681	chr2	160050930	160669067	0.754777	0.879333	0.757736	0.905191	1.23993	0.877154	0.912229	0.996528	0.792246	0.6927	1.73157	1.19828	0.748318	1.1014	0.953901	1.07344	0.894203	1.40527	0.980138	1.05651	1.11376	1.14795	1.07944	1.21264	1.00666	1.07519	1.13924	0.981958	1.21202	0.949963	0.932488	0.740241	0.664998	1.09042	0.906705	0.996922	1.01922	1.20232	1.10734	1.02648	0.68123	0.869446	1.01424	0.947919	1.05373	1.04104
682	chr2	160669068	161202238	0.77113	0.843465	0.949694	1.06157	1.18549	1.03962	0.671593	0.980465	0.895325	0.991653	1.10986	1.04555	1.19364	1.35823	1.21688	1.20009	0.900373	1.29114	1.09069	1.71245	0.526075	1.0427	1.25341	0.84332	1.13156	0.856861	1.19757	1.21046	0.689908	0.686337	1.05118	0.79257	1.07395	1.19391	0.834587	1.23606	1.25387	0.896348	1.22579	1.20149	0.966688	1.13825	1.06068	1.27322	0.844877	1.23666
683	chr2	161202239	161773459	0.819012	1.12937	0.875022	0.9296	0.70444	1.53959	0.745171	0.877601	1.08218	1.18133	0.825829	0.781655	1.21631	0.979098	0.982673	1.22592	0.718226	1.3678	1.03525	0.958008	0.84781	0.910798	1.11192	0.83163	0.784065	0.779631	0.982802	1.10388	0.964283	0.766479	1.09047	0.916567	1.50694	0.892911	0.75816	1.22227	0.905212	1.1919	0.602114	1.23655	1.01153	1.02788	0.960608	0.8143	0.758285	1.08995
684	chr2	161773460	162325710	1.04538	1.00732	0.924932	1.33182	1.12832	1.38959	1.01628	1.0545	0.86365	1.18193	1.03531	1.11221	1.00097	1.06932	1.09911	1.20828	0.619645	1.61646	0.927835	1.05731	0.869961	1.03658	0.853183	1.11796	0.658946	1.24413	1.16159	0.833421	0.843818	0.754752	1.24002	0.887582	1.24012	1.39158	1.1201	1.244	0.8508	1.16577	0.852414	1.43771	1.17776	1.24244	0.676552	0.966273	1.13716	1.05903
685	chr2	162325711	162922715	1.02197	1.00683	0.774562	1.37601	0.984799	1.35895	1.17344	0.955718	0.889972	1.29134	1.17151	0.964057	0.736078	1.11685	0.861754	1.44247	0.615544	1.82411	0.943041	0.820387	0.744034	0.855038	1.50555	0.860417	1.1365	0.972717	1.02489	1.11983	0.926216	0.596574	1.30877	0.979436	0.974508	0.634888	0.672069	0.947779	0.740887	0.889039	0.957906	0.798056	1.05322	1.04986	0.987667	1.15072	1.01846	1.29867
686	chr2	162922716	163482820	0.841039	0.777287	0.929977	1.22492	1.22472	0.874394	0.765764	1.20087	0.888189	1.30168	1.14809	1.03771	1.06958	1.24336	0.931304	0.968996	0.887947	1.48482	0.983012	0.829634	0.883321	0.872909	1.17598	1.14676	0.714833	0.899755	1.0537	0.831928	0.860995	0.917628	0.875779	1.53967	1.06362	0.705662	0.919551	0.872195	1.14831	0.987935	1.32669	0.964109	0.834413	0.867763	0.565051	1.03627	0.722384	0.794761
687	chr2	163482821	164063638	0.802256	1.32493	0.997291	0.907641	0.514294	0.827995	0.70703	0.746902	0.967588	1.21754	1.02583	1.15353	0.893058	0.904883	0.758265	0.970719	1.31866	1.70261	0.934484	1.22359	0.964774	0.995744	1.12011	0.943194	1.1481	1.07833	0.986852	0.9651	1.34535	1.26944	0.839176	0.897405	1.02496	1.25255	1.32865	1.00617	1.09144	0.963746	0.813053	1.03513	0.802235	1.20501	0.807116	0.925162	1.21689	0.640419
688	chr2	164063639	164640860	0.932682	0.776711	0.847144	1.44827	0.736054	1.12361	1.033	0.875991	0.807856	1.26215	1.00461	0.794595	0.990497	1.28139	0.805109	1.18433	0.868559	1.41235	0.914124	1.02523	0.481875	0.865352	1.11132	1.19819	0.617618	0.923451	1.06451	0.584482	1.24639	0.679285	0.80315	0.803475	0.920784	0.890574	1.15325	1.45689	1.19608	0.952761	0.962728	0.911958	1.05926	1.24049	0.803534	1.0212	1.00304	1.09342
689	chr2	164640861	165258046	0.977626	1.41889	0.84301	0.981236	0.997667	0.777984	1.05271	1.00303	1.05902	1.15213	1.04505	1.20251	0.985991	0.971014	0.8834	0.828943	0.529827	1.4639	1.13229	1.06752	1.14986	1.11382	0.814605	1.082	1.25105	0.856635	0.991569	1.00348	0.868641	1.12466	0.983346	0.885178	1.28219	0.730076	0.71687	0.932621	1.13358	0.876081	1.10894	1.25128	1.25313	1.04592	0.656784	0.99585	0.935141	0.962895
690	chr2	165258047	165858757	0.944432	1.20821	0.770122	1.21612	0.794574	1.11328	1.02473	1.1343	0.96266	1.52524	0.947337	1.04818	1.09585	1.02079	1.1119	1.34305	1.12118	1.62648	1.14446	0.832274	0.957802	0.832918	1.02975	1.18943	1.25198	0.744132	0.941397	0.850178	1.28554	0.936122	1.24285	0.917407	1.31143	1.08525	1.04453	1.00996	0.810229	1.24542	0.818806	0.865038	0.886401	0.925304	0.88517	1.01872	1.31566	1.10761
691	chr2	165858758	166434803	1.19002	0.945663	1.18481	0.726753	1.52119	1.2093	1.10257	0.92319	1.03485	1.31504	1.27127	1.20644	1.14699	0.855277	0.877352	0.593337	1.14853	1.69323	1.07417	1.19852	0.608717	0.885173	1.15256	0.82371	0.988407	1.0051	0.994491	1.02939	1.23958	1.62813	1.10161	0.922702	0.995584	1.34378	1.02115	1.39324	1.08312	1.02029	1.13914	1.07431	0.798778	1.20327	1.20877	1.08851	0.764389	1.21685
692	chr2	166434804	167029764	1.15065	1.16718	1.12429	0.949787	1.37193	1.04284	0.967242	1.00932	0.911224	1.3742	0.599618	0.98226	0.915716	1.08429	1.21576	0.593704	1.1408	1.57517	0.904226	0.97428	0.698146	0.962154	1.25308	0.867659	0.984362	0.815538	1.01168	1.06755	1.30926	1.32276	1.16406	1.34087	0.888288	0.924462	1.09664	1.09809	0.994682	1.16886	1.15738	0.827694	0.916996	1.08494	1.20072	1.09783	0.703637	1.12434
693	chr2	167029765	167655412	0.657889	0.916664	0.819765	0.932569	0.863295	0.966083	1.21666	1.05459	0.884728	1.77212	0.867525	0.952972	0.611289	0.955639	1.01745	0.939068	0.919788	2.05397	1.02071	0.900365	0.782882	0.822402	1.16741	0.795261	1.40062	0.866645	1.16227	1.12262	1.56015	0.934006	1.24229	0.985313	1.34423	1.22011	0.831525	1.16273	1.24345	1.0783	0.676946	0.767672	1.03233	0.874626	1.00368	1.10591	0.918563	0.994085
694	chr2	167655413	168282943	1.28421	0.818736	0.764954	0.545258	0.860446	1.20029	1.06216	0.979207	1.07531	0.886212	0.524578	0.885691	0.895648	1.04737	0.514372	1.00591	0.915341	1.40942	0.80823	0.895822	0.704935	1.19914	0.899365	1.10387	1.17988	1.00633	1.11069	1.24476	1.00325	0.795885	1.08961	0.775812	0.821063	0.693205	0.795283	1.01298	0.862499	0.913566	1.05439	0.99704	1.12321	0.844021	0.69737	0.863429	0.624967	1.02499
695	chr2	168282944	168888168	0.905134	1.31738	0.830322	1.0273	0.985163	1.37137	1.15213	0.981208	0.949455	1.63383	1.37672	1.05414	0.929476	0.875695	1.0429	1.11341	1.5089	1.26049	0.881933	0.852259	0.983644	0.930196	0.948905	0.776369	1.28439	1.29295	0.963028	0.670073	0.948491	1.10921	1.13739	1.01343	1.22924	0.949874	0.846693	1.09173	1.10735	1.05471	0.893261	0.972212	0.817507	1.19555	0.677466	1.03572	0.773047	1.10849
696	chr2	168888169	169455058	1.1258	1.04814	1.00989	1.13409	0.972063	0.966859	1.0174	0.871093	1.08414	1.34775	0.924189	0.725862	1.36019	1.13899	1.21262	1.0926	0.878557	1.18987	1.20302	1.32517	0.962469	1.06834	0.909162	1.36878	1.05755	0.908094	0.823263	1.21597	0.881726	1.30809	0.845385	1.15375	1.42159	1.18632	1.12072	0.715959	0.963786	1.16434	0.828941	0.968954	1.15504	1.14792	1.33152	1.04926	0.644766	0.887684
697	chr2	169455059	170031165	0.933931	0.991558	0.637747	0.87884	0.780835	1.03603	0.924771	0.842413	1.01135	1.05015	1.33803	1.03787	0.983843	1.124	1.13178	1.04058	0.916641	1.48926	1.02226	1.59767	1.21827	1.06393	0.95298	0.89009	1.40556	1.09853	1.06763	0.784088	1.17605	0.911859	1.03388	1.17225	1.28603	1.09809	1.15037	1.56701	1.04269	1.00501	1.12046	0.865925	1.33608	1.26138	0.858421	1.3241	1.03329	1.08072
698	chr2	170031166	170666653	1.03065	1.11501	0.88411	1.29575	1.28953	1.40672	1.25068	1.03185	1.05921	1.05629	1.14526	0.64692	1.07784	0.991907	1.19876	1.10534	1.3841	1.1653	0.980059	0.831111	0.646169	1.03511	0.852618	1.25015	1.09426	1.00657	1.0858	0.713708	1.61817	1.35097	1.17566	1.11389	0.924482	1.75808	0.899256	1.22256	1.40996	1.15359	0.785744	1.46765	1.23819	1.21209	0.841376	0.879914	1.07374	1.21478
699	chr2	170666654	171260197	0.754959	1.10555	0.789321	1.24185	1.12617	0.876446	1.23967	0.98321	0.860425	1.01666	1.05253	0.919492	1.35716	1.47837	0.840586	1.50405	0.896411	1.2141	1.02969	0.965513	1.12229	1.1427	1.1054	0.659544	0.941019	0.817415	1.16568	0.813347	1.2123	1.26193	1.31775	1.08012	0.987398	1.12828	0.739751	0.972186	1.33456	1.02063	1.03859	0.844836	1.11467	1.21009	0.938031	1.07388	1.11723	0.777362
700	chr2	171260198	171857302	1.16838	1.08183	0.720272	0.778331	1.13715	1.01103	0.936917	0.870916	1.04469	1.08342	0.961463	0.732596	0.922267	1.189	1.07614	1.22812	1.3001	1.09428	1.10515	1.04349	0.825517	1.1299	1.05362	0.771918	1.08587	0.910348	0.927326	1.22087	1.05735	1.27001	0.942383	1.07995	1.58355	1.05553	0.992828	1.20002	1.25209	1.20074	0.931039	1.01791	0.935425	0.888913	1.30105	1.04085	0.784097	0.757504
701	chr2	171857303	172425821	0.900863	0.942823	1.26599	1.13833	1.01837	1.12603	1.27974	1.01424	0.968153	1.24207	0.782309	1.14297	0.980707	0.895847	1.07269	1.50621	0.813526	1.34854	1.078	1.06604	1.16429	1.0631	1.10965	0.691911	1.21167	1.03055	1.26332	1.20662	1.23577	0.926207	0.999162	0.827714	1.05393	0.901227	1.16479	0.90866	0.82048	1.08008	1.07327	0.801061	0.917061	1.10619	0.836911	1.0753	1.05695	1.05465
702	chr2	172425822	173009238	1.23359	1.0675	1.33431	1.09185	0.732959	0.916774	1.03861	1.13128	1.00755	1.42047	0.955469	0.836202	0.809816	1.06731	1.19596	1.03088	1.14009	1.18192	1.04434	0.809446	0.962895	0.990543	0.767672	1.18795	0.874183	1.05315	0.953136	1.39326	1.00989	1.22314	0.821674	1.03055	1.10749	1.15669	1.2199	1.35703	0.915312	1.10907	1.22376	0.865723	1.0116	1.13337	0.870892	1.17411	1.35477	1.23478
703	chr2	173009239	173539658	1.15537	0.696602	1.14717	1.01141	0.953159	0.910098	1.02624	1.11026	0.92437	1.20168	0.882979	0.987884	0.862046	0.852799	0.819826	1.10812	1.01422	1.09379	0.613485	0.93972	1.04511	0.842794	1.03877	1.07585	0.812238	1.11174	0.804725	1.39493	1.58434	1.06858	1.40374	0.727468	0.863286	0.730965	1.02927	1.01892	1.02827	1.18605	1.1209	1.03139	1.07947	0.974272	0.727608	1.28816	0.859783	1.16792
704	chr2	173539659	174088898	1.00613	0.971204	1.10246	0.927909	1.07487	1.12476	0.902747	1.04825	0.890186	1.55443	1.09183	0.970263	0.937067	1.02964	0.819285	0.975593	0.674933	0.87114	0.851364	0.851918	0.673229	1.16992	0.781415	0.924885	0.792334	1.27984	1.0236	1.04811	0.839671	1.30679	0.930204	0.932431	1.18974	0.985347	0.940125	1.1984	1.25194	0.918117	0.886279	0.880755	1.32636	1.05159	1.17782	0.961673	0.982368	0.725389
705	chr2	174088899	174656529	0.853909	1.0339	0.789802	1.08465	1.04752	1.12959	0.61981	1.12432	0.899943	1.15856	0.840957	0.94214	0.98297	1.15618	1.06953	0.671074	1.18334	0.697104	0.985269	0.876144	0.89349	1.01204	0.838844	1.10818	0.824758	1.17722	1.1182	0.916491	1.13579	1.1297	0.837988	1.15319	1.37516	0.789256	1.04563	1.34473	1.07513	1.13913	0.744759	1.6512	0.634823	0.911743	1.22884	1.19051	0.919477	1.08335
706	chr2	174656530	175232621	1.06099	1.0381	1.00473	0.987951	1.1663	1.37138	0.841405	1.01073	0.938298	1.48842	0.809848	1.06076	1.18484	0.886416	1.04575	0.964134	1.03695	0.9833	0.903708	0.736071	1.00847	0.984996	1.42102	1.13645	1.36356	1.01477	1.07453	1.04277	0.881979	0.95745	1.01355	0.844347	1.19911	0.972859	1.49	1.19126	1.02936	1.18262	0.824306	1.67691	1.12994	1.05623	1.41686	1.0801	1.05739	0.760543
707	chr2	175232622	175784204	0.607985	0.97348	0.742831	0.859817	0.856348	0.766042	0.705468	0.953779	0.949348	0.742233	0.907093	0.762303	0.838967	1.22953	0.881754	0.965152	0.872865	0.766522	1.01426	0.763765	1.04212	0.873693	0.865657	1.23413	1.16483	1.04357	1.15465	1.26123	1.16173	0.877326	0.811124	0.937414	0.680105	1.04041	0.642573	1.02957	0.924043	0.933515	1.05873	1.48574	1.15121	0.935391	1.01022	0.906676	0.807247	1.0415
708	chr2	175784205	176376912	0.675906	1.01701	1.39729	0.697011	0.61171	1.29634	0.864146	0.837923	0.847206	1.08658	0.906225	0.918278	1.26388	1.10033	1.09818	0.73405	0.895259	1.15737	0.960508	0.897395	0.778524	0.94713	1.05	1.10397	0.736424	0.870285	1.25547	0.680904	0.969574	1.16626	1.02429	0.907711	0.773648	1.3994	1.15664	0.962861	1.16849	1.15557	0.673642	1.0044	0.916006	0.882502	1.26567	1.14171	1.08174	1.18452
709	chr2	176376913	176974547	1.00846	1.04188	1.20074	0.816053	1.01611	1.02799	1.1299	1.10874	1.04496	1.19587	0.838973	1.12772	1.15655	1.32744	0.792824	0.984721	0.928338	1.16579	0.798149	0.966994	1.29566	0.941722	0.933779	1.0909	0.74921	0.878562	0.830674	0.955963	1.25779	0.897496	1.34129	1.16266	1.11648	1.07574	1.01984	0.800352	0.960336	1.20665	1.18632	1.29948	0.714099	1.12995	0.89067	1.03509	0.843541	0.762746
710	chr2	176974548	177552906	0.839269	1.17896	0.632305	0.913711	1.20971	1.00506	0.949452	1.08449	0.970648	1.31387	0.696188	1.023	0.979136	1.43969	0.966136	1.05395	0.556386	1.30685	1.12947	0.953341	0.67931	1.0286	0.867635	1.45725	1.31313	0.922079	1.15026	1.26396	0.86192	0.730311	1.2505	1.42936	0.926208	1.0986	0.949793	1.39387	0.981886	1.09376	0.964163	1.19965	1.27299	0.911325	1.49805	1.18584	0.983195	1.01397
711	chr2	177552907	178098801	0.779501	1.25385	0.885637	0.805914	1.05329	0.839512	1.0416	0.901421	0.957077	1.24639	0.808987	1.2148	0.864084	0.832142	0.923774	1.09729	1.1137	0.799061	0.810417	0.737294	0.616371	1.04492	0.687757	0.753023	1.03641	0.969877	1.01297	0.852985	1.21785	0.736629	0.870309	0.999842	1.06269	1.0085	0.82253	0.96436	0.944269	0.870695	0.976967	1.14422	1.13501	1.07514	1.02701	0.90201	0.950843	1.12375
712	chr2	178098802	178661516	0.794955	1.10241	0.979925	1.17388	0.871358	0.978872	0.808906	1.03625	0.994468	1.09823	0.944381	1.04685	0.856054	1.33022	0.583554	0.714315	0.846185	1.09102	1.33693	1.4177	0.864047	0.926833	0.867814	0.833119	0.831653	1.11941	1.03008	1.14375	0.912417	0.857905	1.09005	0.652352	0.764427	1.68559	0.593037	1.41932	0.927319	0.934119	0.794887	0.990391	1.11729	0.911189	1.15748	0.934539	0.981358	0.947358
713	chr2	178661517	179255210	0.892147	1.01508	0.789317	0.620843	1.29553	0.925409	0.892504	0.88142	1.05121	0.60583	0.85248	1.17736	0.870035	1.06767	0.872866	0.620074	0.612784	0.946243	0.888374	0.85029	1.09431	0.981874	1.08033	0.917575	1.29116	0.959581	0.999572	0.694034	0.6061	1.04481	0.681854	0.987339	0.711487	0.909461	0.73864	1.12167	1.01852	1.08118	1.06147	0.967167	1.20759	0.888546	1.06756	1.09149	1.15097	1.24255
714	chr2	179255211	179774323	1.41657	1.12191	0.78913	0.827608	1.12771	1.04824	1.30898	1.05714	1.00758	1.27604	0.853091	1.08014	1.34006	1.10071	0.804972	0.812723	1.57754	1.42937	0.807893	1.03298	0.963888	1.00073	0.98162	0.933094	1.29088	1.03607	1.02839	0.909382	1.21266	0.888062	1.25073	0.986875	0.710938	1.30695	1.16254	0.971493	0.826078	0.861885	0.988799	1.0664	1.08303	1.39859	0.649883	1.16246	0.889314	1.30625
715	chr2	179774324	180390520	0.979144	1.11109	1.20782	0.972746	0.520297	0.599941	0.817731	1.2556	0.862227	0.909814	1.10368	0.847892	0.871968	1.08527	0.978965	1.05247	1.25831	1.12127	0.861881	0.75729	1.10387	0.962892	1.08225	0.786499	1.0297	0.798965	1.08692	1.30698	1.08051	1.20523	0.717688	0.714412	1.26988	1.04115	0.648681	0.905532	0.7759	1.14822	1.07699	1.10889	0.672678	1.39234	1.19024	0.851258	0.83095	1.17326
716	chr2	180390521	180971365	1.06249	1.09585	0.787527	1.02244	1.15155	1.06851	0.98014	1.00339	1.06681	1.4882	0.94947	0.743817	1.31764	1.12642	1.04853	0.777138	1.05396	1.30042	1.34782	1.20484	0.889544	0.832009	1.38131	1.08432	0.849612	1.04197	1.03057	1.09813	1.09215	1.14954	1.39264	0.813328	1.03587	0.926348	0.746907	0.935393	0.781926	1.10008	0.631518	1.1542	0.936294	0.753315	0.856876	0.906943	1.25506	1.00382
717	chr2	180971366	181571683	0.94925	0.979843	1.06355	1.01776	0.719543	0.947025	1.32081	0.956532	0.959122	1.20162	1.14819	0.751972	0.903474	1.26262	0.88381	0.88127	0.721302	0.773769	1.02705	0.933142	1.17759	0.962907	1.10826	0.811752	1.02163	0.981378	1.10033	0.653377	1.4843	0.849007	0.947997	1.09614	1.04904	0.863151	0.924278	1.08922	0.856174	0.928451	0.647128	0.841109	1.18975	1.01666	0.961708	1.13332	0.928571	1.3145
718	chr2	181571684	182145671	1.09128	1.0158	1.09142	0.97745	0.8095	0.924112	1.07161	0.822	1.08204	1.05209	0.986725	0.850136	0.81709	1.23987	0.978708	0.68826	0.785454	0.802973	1.08777	0.689945	0.691071	0.985689	1.20182	1.1256	1.02315	0.943933	1.0008	1.17467	1.23765	0.994415	0.595912	0.785077	1.09946	0.85777	0.925698	1.24999	0.897183	0.977924	0.72189	1.1673	0.95115	0.896079	0.874231	0.794605	0.795156	1.13528
719	chr2	182145672	182722619	0.697973	1.17556	0.893841	1.04935	1.04229	1.05786	1.27057	0.849386	0.976873	1.14084	0.944499	1.13872	0.814969	1.12663	1.13446	1.78315	0.882974	0.995581	0.892451	0.893006	0.988657	1.13725	0.855282	0.604046	1.06024	0.742183	1.06438	0.928012	1.37324	0.831753	0.826303	0.985269	0.827624	1.01447	0.71507	1.16131	0.925083	0.736454	0.647816	0.976861	0.993698	1.10624	1.21657	0.798375	0.870235	0.91392
720	chr2	182722620	183301791	0.818745	1.01964	0.779049	0.747766	1.20911	1.03583	1.21918	0.974159	1.08865	0.781611	0.900548	1.09992	1.16375	1.27504	0.705957	1.03009	0.854606	0.824378	1.05931	0.69349	1.05573	0.956597	1.1128	0.832405	0.803381	0.95721	0.928282	0.60793	1.26317	0.842247	1.10471	1.03657	0.593877	1.57014	1.00834	0.984176	0.760571	1.01114	0.918809	0.774819	0.923764	0.807319	0.912148	0.983576	1.19122	1.6048
721	chr2	183301792	183895901	0.780914	1.17777	1.29562	0.768521	0.834588	0.687848	0.93817	0.97047	0.903076	0.985846	0.756311	0.636039	0.906348	0.939736	1.11362	0.844577	0.600599	0.889867	1.14603	0.936553	1.0413	1.07604	0.934517	0.931402	0.830515	0.987312	1.05171	1.00039	1.05389	0.699139	0.93371	0.710164	1.12822	1.18656	0.829415	0.694491	0.884082	0.86918	0.951824	1.06637	1.20129	0.967178	0.834333	1.04443	1.24949	0.881878
722	chr2	183895902	184513520	0.79111	0.783224	0.878997	0.803371	1.40745	1.18233	1.01128	1.03423	1.16104	0.695832	1.07072	1.06796	0.741117	1.07924	1.02802	0.984417	0.773175	0.90964	1.22836	0.962898	1.15815	0.98848	1.26977	0.827851	1.00717	0.818263	1.07111	1.26244	1.01053	0.796582	1.24142	1.03849	1.08331	1.03433	1.00793	1.42867	1.13391	0.784956	0.866518	0.908956	0.729348	0.956544	0.912446	0.797453	0.921732	1.01237
723	chr2	184513521	185162633	0.874109	1.05066	0.928031	1.23353	0.759965	1.00804	1.18443	1.01243	1.01755	1.13519	0.651105	0.9891	0.884524	1.25983	0.816386	0.98825	0.99977	1.23876	1.05906	1.18169	1.05311	0.971387	0.917505	1.1549	0.914468	0.82833	1.04003	0.832545	1.25782	0.794877	1.06718	0.67588	1.05082	1.15973	0.987805	1.22399	0.988944	1.14421	0.942646	1.31921	0.710804	1.024	1.03233	1.18722	1.00064	0.836181
724	chr2	185162634	185796384	0.709913	1.42335	0.938036	1.24062	1.61764	1.02861	1.2921	0.955024	0.816689	1.23551	0.873436	0.714538	1.15336	1.08542	1.36515	0.85228	1.09817	1.34339	0.870463	0.899021	0.864073	0.94515	1.35657	1.29125	1.04418	1.03228	0.9396	1.08462	1.5864	1.03932	1.2161	1.578	0.95911	1.09995	1.25404	1.06721	1.27833	1.0002	1.21064	0.839335	1.00948	1.20894	0.918644	1.10414	0.986646	1.0768
725	chr2	185796385	186460487	0.991669	1.01523	0.810339	1.41698	0.702451	1.47206	1.30302	0.949143	0.823904	1.13415	0.646136	1.13823	1.04492	1.14347	0.586816	0.647126	0.946959	1.17854	0.884933	0.923728	1.02908	0.978487	1.05835	0.840355	1.27199	0.962468	1.01664	1.06673	0.918617	0.939177	1.0271	0.856222	1.04892	0.695515	0.969089	1.27593	0.895972	1.24535	0.945706	1.121	1.36209	0.985413	0.959927	1.0221	0.911396	0.953131
726	chr2	186460488	187083321	0.98902	0.919871	0.60099	0.689064	0.764997	1.10883	1.48749	0.944931	0.990405	0.909338	0.859104	1.01789	1.17298	0.89141	0.890381	0.670103	0.783906	1.03023	0.988592	0.974632	1.06123	0.911686	1.2111	0.987595	0.872117	0.961948	1.08993	0.918347	1.20477	1.1438	1.26978	1.1817	0.968056	1.61888	1.19875	1.23993	0.912969	0.939654	1.12933	0.903112	1.13362	0.988845	0.54914	1.06685	1.12672	1.12954
727	chr2	187083322	187652730	0.964499	1.03598	0.930046	0.857473	1.19181	0.781278	1.38973	1.08278	0.88537	0.88297	0.974324	1.03623	0.762553	1.10361	1.02387	1.15116	0.584825	0.827982	0.953268	1.16233	0.582094	1.01615	0.790676	0.960519	1.32916	0.792107	0.899914	0.980744	0.889528	1.06637	1.28887	1.00053	0.99517	1.05304	0.922201	1.03168	1.06727	1.15158	0.69397	1.0717	1.34014	0.86543	1.20923	0.76842	0.961584	1.04513
728	chr2	187652731	188269509	0.819032	0.821104	0.837727	0.843667	1.02724	0.897671	0.908456	0.741359	0.773782	0.724073	0.968943	1.1666	0.869265	0.986328	0.766701	1.15521	1.24438	1.27041	0.772412	0.880757	1.17129	1.15863	0.766148	0.795397	0.971643	1.08069	0.876116	0.945456	0.834636	0.579669	1.10222	0.86153	0.976118	0.929418	1.34334	1.34202	1.12735	1.23924	0.89689	0.929097	1.03868	1.09572	1.03483	0.68888	1.2506	0.92766
729	chr2	188269510	188886829	0.971834	0.860177	0.862861	0.909221	1.01773	1.27474	1.35741	1.04357	0.916725	0.954154	0.668961	1.30809	0.920044	0.701658	1.34755	0.930867	1.36817	1.0534	1.2096	0.870538	0.69554	0.907732	1.15724	1.01157	0.934493	0.991194	1.06588	1.15788	1.08308	1.38042	1.1711	0.894255	0.805265	0.531915	1.03008	1.04243	0.833734	1.09468	0.824767	1.31504	1.04393	1.12543	1.10484	0.995507	0.878419	1.22357
730	chr2	188886830	189497440	0.831575	0.997952	0.65642	0.767861	1.07249	0.548709	1.01974	0.855258	0.998746	0.877739	0.993729	0.928334	1.24509	1.06892	1.1136	1.23325	1.0272	1.2037	0.674142	0.972361	0.997916	0.933153	1.48534	0.68656	0.691274	0.860217	0.866178	0.943948	1.22478	1.27097	0.810831	0.805818	1.14544	0.910466	0.473833	1.22315	1.18786	0.812791	0.69144	0.986821	1.24963	0.825682	0.786545	1.02758	0.973287	0.982854
731	chr2	189497441	190072748	1.00184	1.08763	0.842904	1.2826	0.707882	0.960235	1.35264	0.932844	0.828664	0.891305	0.933982	0.815213	1.25269	1.04625	0.890022	0.795026	1.16449	1.12072	1.02241	0.714078	1.12673	0.942359	0.914751	0.748426	1.36406	1.07904	0.798076	1.08261	0.950382	0.931276	1.04491	1.13413	0.954866	1.38584	1.24446	0.829646	0.761029	0.909253	0.743641	1.05869	0.97515	1.04586	0.869638	1.06611	1.00739	0.889656
732	chr2	190072749	190660230	0.799523	0.778756	0.549649	0.705848	0.834659	1.11369	1.02755	0.87073	0.888527	1.0762	0.92148	0.889661	0.989935	0.838155	1.17198	0.650167	0.829734	0.819649	0.862557	1.15445	0.598088	1.00816	0.993279	0.897813	0.840851	0.923764	1.07836	0.74035	1.05333	0.823998	0.952031	1.00842	1.1321	1.1612	0.933152	0.887808	0.977117	1.08001	1.05881	1.15225	1.01835	1.28684	0.723658	0.944544	0.838714	0.972486
733	chr2	190660231	191244044	1.08732	0.799024	0.876994	1.07378	0.704086	1.21861	1.04804	0.84085	0.85346	0.778133	1.1136	1.38206	1.16815	0.926322	0.831489	0.916199	0.931911	1.12777	0.730101	0.78969	0.754967	0.975859	1.16109	0.903507	1.47031	0.817805	1.06303	0.74368	1.13194	0.973217	1.02685	0.858937	1.26168	0.96347	0.981375	1.10652	0.761607	0.841996	0.912648	0.886196	1.10337	1.02899	0.961184	1.18761	0.697152	0.8542
734	chr2	191244045	191811578	0.87637	1.00836	0.932007	0.832659	1.07323	0.761217	0.984997	1.11683	1.00593	0.978554	0.783292	0.963665	0.971075	0.745688	0.955271	1.19526	0.978909	1.34866	1.02654	0.745007	1.02292	1.07909	1.11953	1.10661	1.01335	0.84415	1.16699	1.16523	0.742218	0.828696	0.941034	0.919172	1.11762	0.764572	0.844056	1.43469	1.03305	1.09815	1.02416	0.751263	0.784617	1.13675	0.857825	0.92384	1.10509	0.912879
735	chr2	191811579	192364194	0.854017	0.97909	0.992012	0.755184	0.788961	0.759901	1.0638	0.916108	0.867942	1.1882	1.22205	0.797613	0.831464	1.15422	1.09655	0.597205	0.708089	1.01597	1.05686	0.744249	1.27079	0.999973	1.08182	0.632112	1.33417	0.908553	0.851735	0.798839	1.12262	1.00956	0.694625	1.16176	1.23326	1.03992	0.90284	1.35967	0.885279	0.818098	1.02461	1.03497	0.815601	0.83404	1.24731	1.23965	1.03876	0.823459
736	chr2	192364195	192897830	1.1962	1.21904	0.921756	0.849855	0.833676	0.785047	1.14753	1.00314	1.03349	1.04344	0.654177	0.763959	1.09642	1.29246	0.966023	0.807022	0.811744	1.28508	1.07052	0.774998	0.748865	0.97559	0.98161	1.01189	1.00817	0.820488	1.04468	1.07177	0.816228	0.752987	0.856631	1.06857	0.948858	1.09027	0.665969	0.619288	0.765798	0.864782	0.927355	0.872824	1.07151	0.743794	1.50135	0.96569	0.957526	0.934664
737	chr2	192897831	193540465	0.929394	1.06064	0.902458	1.15351	0.921815	0.913075	0.772449	1.18938	0.779182	0.76448	0.586581	0.738845	0.984892	0.825993	0.861733	1.06151	1.31076	1.17755	1.0769	0.891105	0.963224	1.03596	1.0387	1.001	0.90443	0.904706	1.15546	1.10337	0.844846	1.03126	1.3675	0.91441	1.14445	1.40437	0.844048	1.03834	0.907383	0.779325	1.07307	0.840214	0.80415	0.9714	0.787555	0.763332	0.975563	1.10468
738	chr2	193540466	194179371	0.797461	1.03642	0.876479	0.749286	1.32402	0.840957	1.05747	0.934441	1.00714	0.842019	0.914179	0.745721	1.24521	1.27935	1.03439	1.10435	0.923741	1.2757	0.888405	0.942428	0.931107	1.12817	1.04884	1.08223	1.25344	1.02425	0.976701	1.11006	0.957494	0.789849	1.09335	1.30999	1.27012	1.02119	0.73099	0.814373	0.950738	0.796879	0.903826	1.04715	1.04443	0.917604	0.912656	1.24607	0.903854	1.20268
739	chr2	194179372	194826947	1.09387	1.05832	1.43566	0.998157	1.02456	0.767456	0.954912	0.815508	0.86934	0.910275	1.12868	0.921278	0.81496	1.15254	1.04894	0.974429	0.796418	1.19095	1.11758	0.808792	0.781654	1.0511	1.16623	1.04546	1.08023	0.986743	1.1112	1.02437	1.23061	1.27708	0.975525	1.02137	1.16687	1.20845	1.17603	1.1876	1.11103	0.975121	0.850536	1.10199	0.773298	0.701618	0.796691	0.786075	1.22881	0.973351
740	chr2	194826948	195483620	1.08649	0.823263	0.814948	0.915658	1.25081	0.810653	0.813779	0.939376	0.913858	0.690662	0.952067	0.783241	0.936588	0.899381	0.826152	0.980601	0.96062	1.1665	1.02433	0.941773	0.862081	1.11151	0.919836	1.08262	1.6559	1.04625	1.09136	1.5933	1.02992	0.885743	1.40494	1.15407	0.916967	0.828895	0.691823	1.14174	1.02983	0.761563	0.826368	0.973911	1.01793	1.2943	1.04863	1.23909	1.06067	1.05153
741	chr2	195483621	196095895	0.909521	1.06311	0.946886	1.0687	1.19169	0.788972	0.953799	1.01225	0.995709	1.21954	0.957249	0.843303	0.953539	1.10635	1.03176	0.837545	0.902809	0.969748	1.01379	0.885692	1.24216	1.05287	1.11213	1.01027	0.902	0.97465	0.987143	0.73804	1.02816	0.860421	0.782264	0.78711	0.984661	1.21227	0.829016	1.04044	0.838279	0.781186	0.517026	0.821669	1.19081	0.91338	0.580447	1.04788	1.05579	0.935178
742	chr2	196095896	196708732	0.904703	0.931408	1.06406	0.560758	1.28839	0.791947	1.20447	0.971996	0.887467	1.62935	0.943992	1.06602	1.09536	0.894645	0.874804	1.40669	0.985439	1.26314	1.13024	0.405917	0.927739	0.922386	1.44065	0.759712	0.922178	0.935466	1.12631	0.8057	1.59484	1.13074	0.879943	1.00261	1.18427	0.827894	0.820598	0.693804	1.05637	1.14907	1.15511	0.922011	1.29199	1.2981	1.31931	0.763415	0.581203	1.00123
743	chr2	196708733	197286682	0.922251	1.08814	0.823205	1.23793	0.875859	1.569	1.1012	0.991136	0.944776	1.42719	0.592831	0.66812	0.936129	1.04491	1.28572	1.33407	0.950967	1.24088	0.875676	0.922817	0.848342	0.855786	1.36925	1.07135	0.948173	1.03453	0.967581	1.09224	0.856217	0.628218	0.989984	0.980055	1.11721	1.14657	1.01983	1.31802	0.759977	1.10674	1.16407	1.10086	0.804124	0.796342	1.01827	0.746726	0.746694	1.70172
744	chr2	197286683	197867756	1.10062	0.750993	1.00179	1.11575	0.853151	0.86348	1.04677	1.11827	0.951605	1.10256	1.20712	0.898257	0.835257	0.940539	0.786303	1.42849	1.08114	1.67318	1.08885	0.884272	0.926039	0.937007	0.87881	0.752031	0.738165	0.74141	1.05719	0.735973	1.08406	0.650798	1.05399	0.863975	1.00199	1.26501	1.0254	1.0034	0.766707	0.800441	1.32611	1.16007	0.663165	1.38069	1.09293	1.041	1.14309	1.04741
745	chr2	197867757	198426965	0.979767	0.948989	0.910191	1.50344	1.02104	1.57311	1.00525	0.954374	0.921358	1.51593	0.842354	0.63692	1.25294	0.976156	1.08298	0.725979	0.800232	1.62844	0.945474	1.09249	0.84765	0.99137	1.12193	0.772578	0.609356	1.10413	0.871463	1.51342	1.0769	0.957165	1.12612	1.01809	0.881125	1.06486	1.12439	1.42723	1.00257	0.940994	0.747219	1.12201	1.00283	0.983285	0.598318	0.98606	1.04785	1.04529
746	chr2	198426966	199037780	0.925656	1.15823	1.09582	0.831789	1.26921	1.12428	0.917917	0.825063	0.796188	1.46129	1.24686	1.01766	0.945428	0.958762	1.00383	1.06445	0.846655	1.73039	0.764135	0.883728	0.843328	1.11019	1.29949	0.659018	1.05792	0.908205	0.908527	1.53022	0.90434	0.99683	1.0156	1.15352	1.17386	1.11553	1.07124	0.783917	1.00522	1.13389	0.810135	0.894659	1.37128	1.26866	0.93025	1.0702	1.47742	0.996489
747	chr2	199037781	199629140	0.915276	1.04802	0.964662	0.694537	1.57318	1.14376	1.01878	0.951551	1.04645	0.948742	0.826993	0.967088	0.998084	1.1951	0.983369	1.14761	0.796066	1.79078	0.884913	0.751051	0.981157	0.995511	1.05281	0.908189	1.12083	0.836805	1.03015	0.917793	0.668516	1.38348	0.839087	0.901298	1.03614	1.09615	1.00349	1.1213	0.984283	0.744417	0.840852	0.874036	0.991887	1.0831	1.4337	1.09555	1.22033	0.937902
748	chr2	199629141	200229865	0.946836	1.35622	1.25185	1.35582	1.21321	0.939268	0.89824	1.06769	0.943167	2.05322	0.851511	0.967136	0.963492	0.81859	0.725608	1.26354	0.992382	1.36665	0.897505	0.839557	1.4108	1.09532	1.1132	0.789492	0.743038	1.12726	1.19217	1.04224	1.02701	1.34002	0.845481	1.02317	1.10544	0.594951	0.872903	1.38773	1.09073	0.740784	0.770791	1.08808	0.98193	1.08474	0.628583	1.0566	0.863988	0.957798
749	chr2	200229866	200797130	1.22159	0.97849	1.16062	0.881526	1.0784	1.2054	1.13505	0.940164	0.838208	1.34392	0.692834	0.991217	1.0267	0.727659	1.0651	0.429624	0.972814	1.77725	1.12639	0.795938	0.94819	1.10418	1.286	1.0893	1.45733	1.0265	0.927148	0.835925	1.00144	1.29786	1.08004	1.01813	1.27671	0.885404	0.89143	0.93395	1.09566	1.10104	0.956597	0.958308	0.697693	1.2859	0.676407	1.16563	0.850888	1.02351
750	chr2	200797131	201352467	1.05148	1.27813	1.29509	1.22158	1.03568	1.14075	0.805896	0.952223	0.82026	1.37665	1.51254	0.850093	1.18339	0.837844	1.13883	0.954662	1.25369	1.47783	1.03695	0.950671	0.608452	0.979638	1.07964	1.02298	0.853552	0.868239	1.11	0.925518	1.24056	1.21138	0.948363	0.899662	1.2765	1.4335	0.472186	0.823248	1.02268	1.0306	1.00833	0.847853	0.526577	0.891565	0.872042	1.11563	0.8753	1.11083
751	chr2	201352468	201904224	1.22577	1.02303	0.907514	0.909979	0.931587	1.19268	0.966635	1.24184	0.901137	0.963536	0.883895	0.756985	1.13323	1.08541	0.960958	0.964067	0.739877	2.19329	0.747814	0.949059	0.737116	1.1878	1.36658	1.11848	0.821331	0.946561	0.795021	1.28241	1.27173	0.960156	1.10856	0.750824	0.927873	0.973632	0.911492	0.870059	0.893284	1.32951	1.12453	0.643746	1.00236	1.03696	1.15259	1.0251	0.820256	0.508156
752	chr2	201904225	202492300	0.909633	1.12066	1.54313	1.04967	1.04065	1.04564	1.15249	0.958032	0.927688	0.903916	0.921701	1.09875	0.867241	0.91462	1.04192	0.996286	1.34366	1.58391	0.678058	0.637549	1.14227	1.02305	1.29757	1.33767	1.27523	0.825429	1.13531	1.18299	0.727185	1.2956	0.880182	1.07367	1.26938	1.15988	0.892419	1.32987	1.16932	1.15245	0.925268	1.1828	1.2967	0.942227	0.961663	1.05313	1.37577	0.771257
753	chr2	202492301	203029930	1.20312	1.17795	0.950395	0.685767	1.28089	0.852949	1.10084	1.07787	0.964969	0.626568	0.825762	0.83362	1.14896	0.948837	1.00344	0.878136	0.853332	1.34316	0.67956	0.865966	0.989884	1.07324	0.988814	1.13743	1.05046	0.673871	0.889784	0.94079	0.737402	0.975322	1.08589	1.21641	1.28969	1.12542	1.143	1.31228	1.064	0.98215	0.900196	1.18	1.56101	0.551706	0.804448	1.23546	0.840337	1.04415
754	chr2	203029931	203629667	0.981311	1.32448	0.997605	0.665028	0.739076	1.01423	1.32467	0.933994	1.04065	1.53881	1.19541	0.770702	0.94484	1.38625	1.08977	0.66252	1.10595	1.37902	0.964231	1.21392	0.960616	1.05974	1.15964	1.23604	0.96733	1.05512	0.964089	1.45765	0.71842	0.953835	1.20733	1.13067	0.840451	0.898124	1.07798	0.95953	1.09836	0.873754	0.869873	1.15348	0.944475	0.865637	0.988888	1.0339	1.17444	1.17869
755	chr2	203629668	204254706	1.15703	1.02588	1.17233	1.02943	1.16804	1.20621	1.33416	0.817373	0.90126	1.0157	1.25174	0.858554	0.902217	0.912428	1.16687	1.14777	0.927008	1.17763	0.852988	0.913213	0.911796	1.08034	1.0504	0.764806	0.897265	0.938346	0.871709	1.01401	0.813866	1.19475	0.855863	0.99836	1.03595	0.870739	1.20434	1.03952	1.18679	1.20333	0.65735	1.44737	1.46795	1.02747	0.985177	0.841333	1.04396	0.798941
756	chr2	204254707	204816649	0.902046	1.1117	0.645501	1.16969	0.649789	1.32913	0.947311	0.818167	1.04738	1.54823	1.66215	0.66174	0.71744	1.0673	1.51364	1.4304	1.37022	1.43599	1.02929	0.860114	0.694817	0.78711	0.696279	1.15194	0.924162	0.829234	0.92705	0.741127	0.774985	0.905133	0.879224	0.872788	1.35429	0.966472	0.91853	0.856813	0.909632	0.97346	0.688916	1.26662	0.957522	1.05384	1.09047	1.30654	0.905838	1.17657
757	chr2	204816650	205323412	0.856775	1.14725	0.937403	0.909989	0.960026	1.04006	1.07052	0.990934	0.892321	1.18276	0.95776	1.10978	1.32876	0.777878	1.13305	0.864309	1.40508	1.42174	0.934722	0.687836	0.78588	0.897737	1.0562	1.18325	0.891338	1.25587	0.970213	0.870193	1.14222	1.17846	1.31796	1.31417	1.31277	0.824137	1.12375	1.0946	1.05882	0.614489	1.09849	1.11488	0.813679	1.03708	1.07321	1.18644	1.02624	0.762997
758	chr2	205323413	205905460	0.653242	1.01855	1.09034	0.735323	1.34624	1.13065	0.956663	0.915116	0.998395	1.24621	0.985818	0.919118	0.804789	1.31626	1.02824	1.44861	0.643101	1.42089	1.02803	0.736075	0.982989	0.934879	1.13253	0.767245	1.11681	1.08336	1.36405	0.925262	1.25794	1.47657	0.986717	1.07492	0.762613	0.842701	1.06398	1.24182	1.21773	0.852041	0.701949	0.867602	1.00761	1.18169	0.931953	1.04326	0.736392	1.01893
759	chr2	205905461	206466045	0.76314	0.979685	0.914481	0.823681	0.905282	1.0392	0.789898	0.796294	0.963989	1.12223	0.913061	1.10546	1.05116	0.989396	0.868968	0.84936	0.860565	1.12582	0.824019	1.01745	0.988975	1.15946	0.90589	1.01486	0.978674	0.993041	1.17036	0.968768	0.885535	1.05347	0.840589	0.829436	1.24343	1.0269	0.896289	1.08825	1.02181	1.10162	1.07138	1.09476	1.04434	0.888908	0.838409	0.782521	0.800833	1.20529
760	chr2	206466046	207006434	0.947318	1.30782	1.39484	0.706473	1.08488	1.09477	0.793992	0.85085	0.844085	1.13032	0.904481	1.2451	0.976535	0.770328	1.00945	0.712949	1.31684	1.05648	1.27052	1.05473	1.26753	0.785166	1.15721	1.11374	1.14035	0.71845	0.75052	0.899337	0.775003	1.32778	1.00428	1.29352	1.15765	1.1141	1.02789	0.726809	1.29116	1.3284	1.00708	0.83641	0.898777	0.996862	1.05168	0.648459	0.800397	0.818525
761	chr2	207006435	207606015	0.653293	0.816665	1.03951	1.26466	1.21941	1.2287	1.05819	0.957789	0.800857	1.03617	1.2286	0.766156	0.796394	0.690392	1.22678	1.02893	1.03358	1.73807	1.19478	1.00534	1.0153	0.919193	1.04063	0.912855	0.983943	1.01473	0.927063	1.03465	1.1583	0.853109	1.3656	0.978994	1.55135	0.966758	1.04587	1.04806	1.23993	1.06991	0.901292	1.44098	1.10651	0.902992	1.30843	1.05302	0.859642	0.626612
762	chr2	207606016	208158531	1.01161	0.951256	0.912109	0.880591	1.47157	0.88218	1.0834	1.13256	1.00884	1.31841	1.19478	0.847783	0.730903	1.18926	0.813048	0.984512	0.815552	1.30492	1.05949	0.913283	1.14314	0.745936	0.805559	0.654248	0.937646	1.06398	1.30688	1.05843	1.65754	0.923471	1.03973	1.23388	1.36251	0.966385	0.873804	0.741565	1.02218	1.02151	0.796329	0.776715	1.22371	0.945291	0.910244	1.02098	0.820408	0.599482
763	chr2	208158532	208744211	1.00099	1.06682	0.957923	0.935831	1.08736	0.968854	0.943829	1.1577	0.880855	1.26661	1.24854	1.26877	0.825816	0.850228	0.955365	1.06425	1.06751	1.6205	0.732721	0.64353	1.13757	1.09778	0.874463	0.871666	1.15867	1.16438	1.1622	1.25086	0.620993	0.882967	1.11397	0.936309	0.94887	0.819883	0.7634	0.959835	0.872583	1.00343	1.04013	1.06357	0.88788	1.09384	1.29638	1.55573	0.877922	0.865982
764	chr2	208744212	209307346	0.687274	0.971261	1.03311	1.14698	1.16516	1.3928	1.00073	1.21963	0.941368	0.777636	1.03971	0.708475	1.01068	0.754008	1.05805	1.37913	0.883218	1.54466	1.14629	0.952578	0.86223	0.949751	1.16591	0.771076	1.04914	0.916252	0.944569	1.483	1.45689	1.21243	0.929954	0.77681	1.19001	0.788369	0.667474	0.937804	1.06097	0.814321	0.935794	1.38796	1.16582	1.01191	0.830132	1.12847	1.08724	0.918736
765	chr2	209307347	209950366	0.856561	0.922304	1.04762	0.842528	0.791498	1.15621	0.977755	0.964974	0.921739	1.17571	1.0137	0.761342	0.953967	0.904171	0.969446	0.634847	1.0428	1.68958	1.18381	0.987726	0.874766	0.92083	1.03176	0.895772	0.860234	1.39838	1.11357	1.02305	1.009	0.867124	1.14525	0.736118	1.02931	1.11411	1.25244	1.45855	0.998202	0.88582	0.816313	0.401155	0.95432	0.85136	1.42616	1.23949	0.942436	1.09254
766	chr2	209950367	210574043	0.780776	0.92455	1.17861	1.61064	1.45239	1.32912	0.891475	1.07078	1.1569	1.45592	1.28465	0.875556	1.16927	1.29871	1.27747	0.84442	0.911303	1.80219	1.03272	1.05845	0.625591	0.985736	1.01745	1.20271	1.07868	1.17154	1.29101	1.24288	1.22091	0.809803	1.0148	1.17281	1.02123	0.929769	1.49266	0.694726	0.945124	1.19039	1.22449	1.04613	1.00079	1.05831	0.982142	1.02592	0.884106	1.41335
767	chr2	210574044	211171618	0.984366	1.10546	0.783334	1.06275	0.817133	0.806346	0.956496	1.05052	0.952041	1.15469	0.996754	1.3875	1.19697	0.952803	1.05733	1.31361	0.602008	2.00049	0.832587	1.03265	1.2686	1.28445	1.15934	0.683978	1.03791	1.3414	1.07174	1.46386	0.787244	0.757035	0.995718	0.858197	1.04683	1.22825	0.812458	1.30194	0.698715	1.53171	0.850558	1.00989	0.925084	1.00726	1.20825	1.02035	0.869061	1.01907
768	chr2	211171619	211768561	1.08575	1.01883	0.810158	1.08366	0.633988	1.17378	1.19467	0.991741	0.965225	1.37275	1.3594	1.36583	0.902867	0.935707	1.28654	0.624632	1.2633	1.57365	0.971611	1.00359	1.35586	1.0329	1.07809	0.943358	1.22357	0.934241	1.19224	1.03517	1.00235	1.2716	1.37881	0.984632	1.04047	0.929627	0.726791	0.894649	0.885773	1.00951	1.12198	1.16017	1.23973	0.917685	1.08326	0.968457	1.14795	1.0098
769	chr2	211768562	212385880	1.09802	1.0682	0.539226	0.867398	0.839941	1.11719	1.0098	1.01296	1.05827	1.19269	0.880487	0.865051	1.10238	0.834788	1.22221	1.05535	0.943005	1.27647	1.10207	1.33817	0.929592	1.01659	1.58011	1.1205	1.24167	0.956409	1.22918	1.20227	1.13114	1.18941	1.19852	0.837132	1.04084	0.662508	1.34011	1.76366	1.01145	0.681937	1.0269	1.04569	0.874543	1.07014	1.55098	1.26834	0.817208	0.722085
770	chr2	212385881	213023884	0.738952	1.31406	0.874337	0.793803	1.11493	1.01855	0.82546	0.903217	0.966173	0.735072	0.830285	0.840517	0.831268	0.782505	0.958613	1.42058	1.06212	1.46784	1.16237	1.26215	1.2086	0.848883	1.12685	1.25667	1.13803	0.899776	0.988893	0.798021	1.20525	1.14768	1.10742	0.832799	0.942931	1.29673	1.00242	1.13985	0.883497	1.10096	0.85857	0.973401	1.03714	1.01704	1.12175	0.973644	0.978377	1.04065
771	chr2	213023885	213649304	0.802448	0.959775	1.11964	1.10853	0.937465	1.51407	1.09442	1.0747	1.02512	1.11238	0.817561	0.78298	0.917129	0.810744	0.985626	1.56079	0.908464	1.27379	1.00047	1.08972	0.977273	1.15877	1.17742	1.08931	0.772781	0.950408	1.05471	1.26523	1.13957	0.987981	1.15466	0.923746	1.53377	0.284087	0.948491	1.28245	1.00775	0.815444	1.007	0.919821	1.40552	1.19769	1.07489	0.800643	0.952885	0.884733
772	chr2	213649305	214234366	1.1096	1.03698	0.795359	0.961216	0.887905	0.825145	0.910147	1.0649	1.04615	1.35868	1.10072	0.963854	0.85658	0.991071	0.857095	0.656819	1.22285	1.45582	1.06106	0.99748	0.903177	0.985563	0.622661	0.729536	0.892303	0.764812	0.822187	0.932756	1.10144	0.894089	1.11916	1.20387	0.915044	1.2505	1.29926	0.873895	1.02025	1.28487	0.680118	0.875333	1.0295	1.31382	0.785535	1.35273	0.792535	0.901702
773	chr2	214234367	214852894	0.928315	0.8778	0.617769	0.955951	0.957191	0.762316	1.01138	0.998528	0.755862	1.17601	1.0051	1.10048	1.27393	0.746416	0.904706	1.06482	0.890096	1.05423	0.833393	1.27814	0.890128	0.776411	0.951533	0.699184	0.837332	0.902857	1.19348	1.04269	0.832911	1.19032	0.950554	0.98816	1.12029	1.20349	1.37984	0.934127	1.18074	1.18215	0.897504	0.923257	0.49257	1.19106	1.18021	1.2859	0.917216	0.909555
774	chr2	214852895	215430070	0.865774	1.16821	0.536525	0.963232	0.884764	0.82673	1.01565	0.946791	0.960048	0.873212	1.18221	1.21519	1.20324	1.19856	0.694202	0.85321	0.972866	0.999044	1.11673	0.935159	1.13113	1.07371	0.996379	0.732627	1.12385	1.02004	1.10308	0.807298	1.06924	0.903316	1.29412	0.961665	1.12308	1.21321	0.732867	1.1504	1.35004	0.72312	0.767622	1.02484	0.838165	0.887446	1.06324	0.988951	1.01173	0.813587
775	chr2	215430071	216033288	0.776662	1.25035	1.02222	1.23819	0.804951	0.867767	1.11569	1.31334	1.07903	0.881828	1.19781	0.989598	1.24076	0.908214	1.37504	0.990523	1.20411	1.01947	1.17293	1.02372	0.949598	0.937313	0.951285	1.06853	0.966349	1.09907	1.091	0.605475	0.736822	1.08913	1.13458	0.745154	1.14558	1.23109	0.884046	1.39607	1.29938	0.780665	0.875419	1.00439	0.866933	0.824867	0.798363	0.921374	1.20864	1.25961
776	chr2	216033289	216581914	0.847404	0.798677	0.947259	0.906991	0.75697	1.23705	1.32014	0.943578	0.937213	1.14261	0.946223	0.766449	1.33863	0.73922	1.04868	1.07128	0.787305	1.15277	1.15361	0.854118	1.03306	0.920726	1.06254	0.737386	1.02861	0.96719	0.975494	0.713794	1.28945	1.00492	0.633114	0.773488	0.831915	0.915538	0.724899	1.29739	0.972023	1.05429	0.952235	1.17368	0.866735	0.890099	0.972648	1.11328	0.520712	1.16946
777	chr2	216581915	217115576	1.0153	0.938731	1.22049	0.955233	0.78565	0.616476	1.08484	1.06319	0.920411	0.891897	0.510532	0.815178	0.965483	0.78966	1.03505	0.973471	0.862857	1.47181	0.969801	0.994468	0.868673	0.868958	0.978056	1.04495	0.846083	0.916044	1.22528	0.916398	1.00451	1.71382	1.28065	1.02616	0.997917	1.12768	0.769283	1.09199	1.07588	0.976088	0.769751	1.06523	0.984611	1.01144	0.83661	1.11821	0.987384	0.89569
778	chr2	217115577	217635057	0.959211	0.941156	1.30636	1.18444	0.720158	0.755157	1.05378	0.907979	1.02883	1.13868	0.988496	1.03913	0.84963	0.813082	1.21686	1.3698	1.24867	1.25164	0.864945	1.09823	1.01877	1.00288	1.01878	0.744216	0.765645	1.05108	0.934177	1.00863	0.797817	0.753965	0.79463	1.62041	0.969845	1.1306	0.986643	1.05028	1.02085	1.21814	1.12433	0.826227	1.18258	1.13561	0.903386	1.08043	1.14539	0.779365
779	chr2	217635058	218179413	1.02045	0.844597	0.838957	1.01419	0.852229	0.660909	1.06144	0.938775	1.15092	0.977194	0.607586	0.830261	1.06977	0.887641	1.00395	1.138	0.799879	1.15877	0.810086	1.30548	0.941515	0.941155	1.19987	0.803267	1.06844	1.09095	1.21722	1.26404	1.21202	1.31102	0.721317	0.810532	0.921696	0.825686	1.11916	1.72311	1.13836	0.964677	0.741532	1.09646	1.40639	1.01138	0.710226	1.01967	1.20341	1.15331
780	chr2	218179414	218692445	1.41386	1.06322	0.897711	0.932301	0.960458	1.02158	0.78451	0.969215	1.0704	0.94583	0.865812	1.15774	0.973214	0.998595	1.00768	0.654664	1.28865	1.08601	0.920803	1.07692	1.04344	0.977224	0.952721	1.35442	0.906724	1.08906	1.11376	0.925302	0.976669	0.758288	1.25141	1.04003	1.03176	1.12426	1.15557	1.28457	0.778433	1.06397	0.823125	1.39952	0.878616	0.982753	0.979335	1.19963	1.26281	0.986083
781	chr2	218692446	219232032	0.822272	1.11111	1.15471	0.766887	1.03052	1.07533	0.803195	1.08109	0.959902	0.725638	1.09112	0.878234	0.944368	0.916996	0.91426	0.951451	0.733779	1.14637	1.02488	1.10497	0.947665	1.06032	0.911495	0.68447	0.99974	0.899455	0.991706	1.34868	1.27119	1.16511	1.07553	1.21838	0.932537	0.72433	0.512722	1.17624	0.925731	1.36	0.839908	1.19247	0.917915	0.907475	1.21485	1.14793	0.874479	0.984534
782	chr2	219232033	219808940	0.527215	1.12145	0.994536	1.0885	1.04148	1.13497	1.11319	0.810232	0.843638	0.717883	0.787724	1.26635	1.09492	0.788629	0.801793	0.97061	0.948863	0.994453	0.857086	0.817778	1.54	0.999765	0.991893	1.07337	1.16721	0.952104	1.16275	1.28109	1.17294	1.18757	1.13688	1.08904	1.24267	1.04108	1.03002	1.04092	1.26411	1.16607	0.838352	1.43014	1.06261	0.818808	1.14596	1.1082	0.995841	1.16061
783	chr2	219808941	220374296	0.989905	0.781556	1.17563	1.40067	0.592966	0.633428	0.851037	1.11334	0.814664	0.914218	0.832215	1.14688	0.812562	0.88001	1.08191	0.843253	1.0789	0.907229	0.800404	0.917285	0.613111	1.15895	0.771126	1.10496	0.773209	1.03076	0.816922	0.768426	0.987754	0.983485	0.673694	1.18656	0.829837	0.804893	0.928608	1.1933	0.904035	0.987049	0.771251	1.06988	0.830769	0.890867	0.93334	0.841153	1.07708	0.789188
784	chr2	220374297	220896785	1.27502	0.779775	0.85976	1.06342	0.694292	0.851242	1.15626	0.799997	1.09578	1.34307	0.76991	0.714549	1.03413	0.650024	0.980717	0.842492	1.36703	1.10745	0.89848	0.755736	1.02048	0.864589	0.96315	1.07495	0.823563	1.01349	1.06068	1.17971	1.01869	1.29172	1.03574	0.746207	0.77378	1.3482	1.07456	0.922383	0.985514	0.492142	1.12715	1.11774	0.677862	0.800431	1.21423	0.838472	0.499157	1.25068
785	chr2	220896786	221456349	0.945119	1.00576	1.09717	0.941322	0.707852	0.91749	1.03936	0.873311	1.02678	0.80927	1.50249	0.709394	0.907978	0.975709	1.43575	1.06571	0.7988	0.942447	0.765185	0.905215	1.38845	0.926259	0.914869	0.926923	1.42918	1.21582	1.02913	0.791592	0.593369	0.851821	1.0596	1.0665	1.0726	0.594432	0.977806	0.56547	0.898728	0.875166	0.761832	0.61158	0.928937	0.93352	0.663566	0.94144	0.811218	0.862294
786	chr2	221456350	222053679	0.909478	0.725712	1.08875	0.624097	1.54619	1.06318	1.04878	0.897705	0.957578	1.45645	0.964828	0.877425	1.18844	0.890276	1.20884	1.01762	1.29364	1.33162	1.09876	0.92793	1.11166	0.9695	1.02578	1.0926	0.890128	1.36808	1.18714	0.801215	1.05657	1.04812	1.17407	0.868167	0.814571	0.911649	0.90343	0.968463	1.31806	1.07215	0.981296	0.993603	1.51536	0.800406	1.0858	0.964242	1.08751	1.21242
787	chr2	222053680	222632543	0.957324	0.994133	0.690462	0.881343	1.02108	1.00783	1.00527	1.06857	1.10271	1.34724	1.09001	0.920027	0.957103	1.33112	1.24447	1.15509	0.679128	1.37142	1.03683	0.568972	1.12196	1.09115	1.4088	1.30742	1.13162	0.805382	1.01053	1.04754	1.35909	0.771953	0.968394	1.07979	0.904384	1.45507	1.24312	1.18105	1.07019	0.940987	1.02737	1.04037	0.607699	1.45602	1.22266	0.896434	1.04781	1.28997
788	chr2	222632544	223225608	1.21917	1.01884	0.968492	1.10327	1.26283	1.17808	1.00572	1.08875	1.06028	1.43689	0.88919	1.07927	1.19819	0.960567	1.12103	1.28369	1.02341	1.24542	1.02807	0.958801	0.76149	1.07641	1.15771	0.826159	1.24243	0.94131	1.02289	0.947498	1.37982	1.23897	1.09887	1.10397	1.20144	1.01037	0.856617	1.14571	0.883127	0.931099	0.819061	1.41212	0.702505	0.876887	0.90596	1.00797	1.05611	1.01878
789	chr2	223225609	223806104	0.902471	1.08513	1.25091	0.961982	1.01861	0.938775	1.03907	1.09942	0.961425	0.854121	1.10497	0.933443	1.20436	1.1035	1.0298	0.764594	0.641088	1.09806	0.763377	0.854026	0.933483	1.14738	1.3918	1.16132	1.09596	0.803394	1.10561	1.06417	1.01229	1.23961	1.54817	1.1889	1.24478	1.01124	1.15437	1.24335	1.31966	1.16661	0.725497	1.17976	1.03327	0.997879	1.04746	0.827116	0.581245	1.57136
790	chr2	223806105	224407124	0.671243	1.13843	0.769322	1.12357	1.2557	0.856104	1.20053	1.022	1.01899	0.840085	1.21848	0.843922	0.921261	1.02648	0.80608	1.13805	0.902253	1.14757	0.989189	1.24614	1.21038	0.966759	1.20901	1.14288	0.859382	1.16494	0.867253	1.68227	1.07784	0.946676	1.1345	1.54079	1.02243	1.66641	1.02936	1.55244	0.66204	1.40576	0.607065	1.10581	1.25968	1.18899	1.33728	0.931306	1.35899	1.05553
791	chr2	224407125	224980386	1.00832	1.11446	0.822821	0.961893	0.995026	1.27215	1.03102	0.847147	0.92705	1.07138	1.05405	0.885926	1.26941	0.814052	1.33413	0.997545	1.1139	0.981426	0.732506	1.16554	1.35625	1.19317	1.03847	1.46356	1.10331	1.00974	1.18632	0.585116	1.19184	0.766971	1.28202	0.968535	1.35656	0.560205	1.37107	1.45851	1.05353	1.33574	1.0732	1.40372	1.19846	0.801433	0.9746	1.0465	0.916588	1.39845
792	chr2	224980387	225550324	0.953993	1.20581	0.98799	1.39124	1.01366	1.26414	1.13554	0.984238	0.981735	0.956511	1.42318	0.842343	0.960154	0.987386	0.964749	1.03494	0.570244	1.04519	1.41461	0.872921	1.11398	1.15069	1.11679	0.65684	0.936261	1.05436	0.970102	0.800515	0.616996	1.38111	0.976156	0.848114	1.24304	0.756309	1.06545	1.08388	0.857428	0.8673	0.845567	0.769535	1.04918	0.960025	0.866999	1.1414	0.742702	1.27066
793	chr2	225550325	226149564	0.781054	1.19196	1.52035	0.764189	0.995202	1.10153	1.16035	0.940007	0.771324	1.05839	1.17541	1.17618	0.900611	1.11293	0.971636	1.01383	0.852732	1.18526	0.917157	0.725115	1.17059	0.89633	1.33523	1.17949	1.35685	1.08318	1.01889	1.10851	1.01683	0.818687	1.06126	1.18482	1.2212	1.99827	0.811164	0.767925	1.05033	0.901337	0.972372	0.704905	1.24819	1.1793	0.831345	1.54033	1.24088	1.11221
794	chr2	226149565	226735473	0.85563	1.0977	0.908162	1.12136	1.00174	0.653009	1.0674	0.595499	1.03526	1.13545	0.735891	0.868623	0.790089	0.720034	0.81637	1.45662	1.09776	1.35052	0.876695	0.769229	0.802808	0.844688	1.0078	1.12362	1.21767	0.969027	0.873508	0.946648	0.938855	1.06188	1.26246	1.24497	0.676421	1.10208	0.756562	1.08327	1.16084	0.999618	0.578271	1.08477	0.75654	0.900812	0.862835	0.98405	1.20579	0.856039
795	chr2	226735474	227324478	0.862902	1.06425	1.20839	0.601212	1.26363	0.985173	1.14208	0.797982	1.05015	0.864948	1.03269	0.940485	1.15252	1.02535	1.09654	0.844358	0.84436	1.06267	0.891213	0.854815	1.29819	1.00537	1.06494	1.09243	1.03682	1.14654	1.38856	1.13117	1.10098	0.781422	0.807094	1.26518	1.14863	0.833501	0.939748	0.941368	0.944643	0.869173	1.02065	0.988622	0.743358	0.748085	1.08061	1.02505	1.12816	1.31029
796	chr2	227324479	227877678	0.916083	0.96458	0.694655	0.570081	1.59824	0.946079	0.982635	0.875666	1.05929	1.12116	1.4445	0.790038	0.956186	0.919193	0.915251	1.37163	1.0017	1.1647	0.726661	1.01558	0.77401	1.05496	1.18589	0.695924	0.897293	0.94085	1.04928	0.951875	1.03658	1.09849	0.88196	1.0828	1.0166	0.622454	0.92736	0.823321	0.985855	1.13406	0.7854	0.92172	1.54775	1.07943	0.867274	0.93363	1.26959	1.07911
797	chr2	227877679	228440656	0.861183	1.128	0.994506	0.961791	0.824671	1.12306	1.12306	0.811975	1.07717	1.1785	1.12538	1.01635	1.19265	0.596967	0.919995	1.16413	0.994555	1.35093	1.01349	0.835086	1.11451	0.989548	1.04713	0.640879	1.06368	1.01034	1.20759	1.03337	1.03426	0.970436	1.15519	1.21653	1.1969	0.967868	1.07001	0.982156	1.12954	1.1988	0.999156	1.21876	1.24022	1.24962	1.08723	0.851385	1.21217	1.27219
798	chr2	228440657	229049246	0.784744	1.0489	0.953024	1.08485	1.2221	0.923914	0.898639	0.715403	0.899739	1.00215	1.17109	1.01827	0.929137	1.10071	0.832107	1.107	1.20799	1.05278	1.09463	1.16035	1.03885	0.840799	1.10614	0.941168	0.847614	0.902289	1.15702	1.20598	0.924049	1.1285	1.00075	0.736301	0.99457	1.20257	1.01454	1.21722	1.24217	0.996923	0.91226	1.21624	1.04706	0.951058	1.30731	1.135	1.02176	0.80034
799	chr2	229049247	229662697	0.853761	0.806394	1.37626	1.01214	1.19439	1.13416	1.32509	1.16528	0.994257	0.994218	1.50983	0.764682	1.09718	1.22575	0.846623	1.14114	1.24788	0.893948	1.01515	1.03329	0.982431	1.11592	1.15228	0.950568	1.43195	1.16702	1.37497	1.03496	1.04038	0.706485	1.08838	1.29239	1.29618	1.02276	0.818781	0.854574	0.937335	1.12418	1.01047	1.22113	0.738324	1.07854	1.32707	0.932797	1.15609	1.34906
800	chr2	229662698	230228189	1.01517	0.952953	1.25509	1.0176	0.97227	1.02591	0.971388	1.06669	0.85591	1.6892	1.72338	1.31311	0.958327	1.13901	1.07614	1.17626	1.07796	1.19272	0.923127	1.03688	1.43793	1.16603	1.03693	0.975119	1.28619	1.01894	1.09571	0.77709	1.03873	1.01789	1.37402	1.26495	1.1935	0.782488	0.961673	0.849547	0.979559	1.13573	0.711196	0.941859	1.14308	1.24547	0.784467	0.812685	0.995461	1.39189
801	chr2	230228190	230800531	0.878073	0.970843	1.43748	1.13428	0.842369	1.22924	1.14185	1.02692	1.10135	0.87109	1.33706	0.68892	1.00078	1.48787	0.863961	1.00686	1.15984	1.02193	0.908471	0.999836	1.44464	0.918194	0.907801	1.13061	1.11033	0.984184	1.03534	0.917175	1.06261	1.06388	1.46712	1.15233	0.928667	1.20497	0.922102	1.11156	1.07904	0.774999	0.845782	1.17105	0.801472	0.673256	0.732474	1.03365	1.08663	1.26866
802	chr2	230800532	231405846	0.973476	1.08909	1.51854	1.51976	1.10059	0.914812	1.23487	1.10932	1.0688	0.981516	0.954244	0.893374	1.10488	1.00723	0.847023	1.20521	0.988675	1.15265	0.846915	1.00903	0.881177	1.05449	0.881605	1.05262	0.956465	1.05195	1.12237	1.2333	1.30679	1.27109	1.13951	0.698201	0.87447	1.39615	1.13181	0.723026	0.996085	0.964713	0.91911	1.16271	1.39489	1.18151	0.654817	1.05925	1.28617	0.884131
803	chr2	231405847	231962181	1.15345	1.1933	1.00356	0.775105	0.978664	0.955606	1.16207	1.01641	0.927833	0.654138	1.32007	1.01275	0.945412	1.11258	0.767374	0.835048	0.798451	0.991845	0.966261	0.882888	1.09926	0.971426	1.08111	1.01001	1.42887	1.07116	1.04558	1.0965	1.07914	1.05685	1.4342	1.19506	1.62954	0.740994	1.17278	0.905848	1.09983	1.0231	0.676676	0.906414	0.845371	1.24911	1.04306	1.42297	1.10386	0.823368
804	chr2	231962182	232509364	1.00532	0.795728	1.01912	0.772968	1.40386	0.781036	1.19911	1.04031	0.881805	1.19706	1.09349	0.680253	0.944424	1.12114	0.959598	1.04166	0.903298	0.973549	1.04132	0.857732	1.01874	0.915837	0.670522	0.730458	1.13829	1.26765	1.12942	1.42074	0.968273	0.577337	0.647675	1.27753	0.746693	0.665647	0.736733	1.0012	1.34216	0.98025	0.677616	0.72135	1.07058	1.02205	0.78618	0.786924	0.925815	0.895956
805	chr2	232509365	233105626	1.05953	0.967579	1.41016	0.814155	1.06362	1.31337	1.33124	1.08151	1.10575	1.12039	1.13079	0.671066	1.06976	0.855739	0.755855	1.10563	1.58166	0.893155	1.1448	1.41019	1.58845	0.920213	0.864486	0.79127	0.562305	1.04209	1.01374	0.900372	0.786066	0.970291	1.44531	0.86319	0.699346	1.40165	1.26659	0.938675	1.12198	0.863094	1.04316	0.898744	1.36495	1.1133	0.97067	0.923946	0.995593	0.767257
806	chr2	233105627	233691097	1.56386	1.28875	1.1937	0.695154	1.12864	0.942235	0.855773	0.946018	0.975529	1.07073	0.91216	0.86976	1.37181	1.39806	0.860956	1.05703	0.823002	0.906885	1.07893	0.841573	0.85622	0.969757	0.7199	1.2789	0.668848	1.23696	0.936069	1.0566	0.85977	0.946306	0.918007	0.973303	1.27586	0.949462	0.812991	1.2977	1.01073	0.966782	0.791123	1.14471	1.16148	1.06446	1.14708	1.16765	0.935135	0.949937
807	chr2	233691098	234322803	1.23622	1.28913	1.28467	1.04602	0.913588	1.10301	1.06635	1.12377	0.881842	1.39944	0.930606	1.09249	1.07587	1.32484	1.03653	1.1838	1.41769	1.15244	0.972195	0.719839	0.620073	0.866087	0.841511	1.23357	0.790244	0.755699	1.04945	1.08493	1.15495	0.865198	0.689529	1.02523	1.36138	0.587225	0.992914	0.993897	0.73886	1.19055	1.41533	1.49833	1.09225	1.19416	1.32155	1.37108	0.97755	1.00222
808	chr2	234322804	234876730	0.533123	1.23073	0.571431	0.551057	0.808824	0.922956	1.26669	0.792087	1.14109	0.976606	1.08995	0.565624	0.9853	1.15844	0.918833	0.87065	0.948964	1.17158	1.10108	0.788453	0.968194	0.97968	0.808226	0.981099	0.970746	1.01109	1.05837	0.764121	1.20278	0.992696	0.695214	0.934701	1.29672	1.22119	0.917052	0.650391	0.880939	1.1379	1.04047	1.02127	1.12119	1.09364	0.997995	0.699117	1.04848	0.754029
809	chr2	234876731	235442059	0.730966	0.843966	0.943533	0.869299	1.43987	0.984945	1.0846	1.13209	0.935523	1.15548	1.19541	0.880119	1.01548	1.19685	0.867922	1.10889	1.00439	1.0006	0.910833	1.0727	0.85677	0.99425	1.16697	1.34288	0.833613	0.933141	0.989803	0.877963	1.03547	1.08004	1.10294	1.23074	0.994727	0.746009	1.16089	0.756459	1.07446	1.04355	0.665082	1.14045	1.30785	0.896209	1.09508	1.02462	1.06332	0.981393
810	chr2	235442060	235995331	0.985543	1.1488	0.741707	0.833897	1.55007	1.13761	1.04844	0.906886	1.02679	1.36329	1.02336	1.02692	0.924473	1.0683	1.16129	0.845357	1.25449	1.11567	1.05466	0.770345	0.614987	0.823854	1.06805	0.919715	1.01445	0.875372	0.938377	0.95062	0.948543	0.694974	0.905908	0.965116	0.884954	1.23009	1.0942	1.14167	1.13823	1.04178	1.22522	1.06794	1.01983	0.969028	0.911649	1.22032	1.13876	0.660406
811	chr2	235995332	236527031	0.778005	1.13887	0.690273	1.28851	1.19068	1.08742	1.06135	1.04091	1.02302	0.98923	0.692985	0.765474	1.08414	1.04091	1.22997	0.718434	0.930216	1.00558	0.796799	1.02023	1.07375	1.10013	0.889563	1.0096	1.04884	1.04308	0.85431	0.931525	0.966592	0.68464	1.33871	1.20471	1.33219	0.706607	1.23861	1.1698	1.12524	1.12623	1.27856	1.09278	1.07043	0.653214	0.761289	0.743269	1.00154	0.841558
812	chr2	236527032	237054632	0.98277	0.88203	0.708181	0.821574	0.941416	0.748521	1.01298	1.1657	1.02446	1.36498	1.1301	0.820799	0.916757	0.694039	0.990432	0.92685	0.811186	1.02996	0.880116	0.886186	0.831347	0.987958	1.28055	0.926421	1.22335	0.880407	1.02684	0.875775	0.978631	0.715136	0.741267	1.09735	1.02644	1.1777	0.839096	0.830949	1.03493	1.2625	0.948137	0.579395	1.08691	1.0781	1.29576	1.21496	1.25344	0.932884
813	chr2	237054633	237606095	1.04763	1.27658	0.849223	0.868228	0.785975	0.655712	1.57913	0.76873	0.879149	1.16482	1.07078	0.950058	0.91454	1.01376	0.748913	1.10876	0.775867	1.09524	0.8464	0.841356	0.646076	0.965172	0.906919	0.682992	0.95274	0.918654	1.13725	0.711983	0.993263	0.990543	0.600684	1.1228	0.987072	0.995682	0.70353	0.607337	1.19301	1.35385	1.14149	1.30954	1.43679	1.04904	1.32409	1.18501	1.29361	0.628967
814	chr2	237606096	238134641	1.00752	1.11575	0.726072	1.2957	0.657712	0.921907	1.33831	1.04088	1.19215	1.15755	0.909328	0.986431	0.902453	1.28623	1.09836	0.576008	0.816743	1.22315	1.14229	0.852491	0.831494	0.852075	0.961575	1.0413	0.907936	1.04808	1.15826	0.770524	0.939492	1.18641	1.16639	1.13626	0.894542	1.22463	0.763243	1.53866	1.09565	1.25821	1.12575	1.06086	0.875209	0.691178	0.479702	0.901709	1.25246	0.732972
815	chr2	238134642	238642009	0.956945	1.16222	1.08064	0.746539	0.535738	0.845577	1.1644	0.824815	1.0287	1.05702	1.0761	1.01608	0.778527	1.20493	0.915641	0.694382	0.955289	1.32663	0.764427	0.981608	0.871721	1.10277	0.852541	1.1877	1.22239	0.881147	0.898375	0.969229	1.05342	1.19398	1.02874	1.13016	0.986841	1.09107	0.584051	1.21425	0.878242	1.02805	1.16318	0.77129	0.941909	0.806688	0.767431	0.993219	1.21212	0.952318
816	chr2	238642010	239218709	0.880908	1.21004	0.875207	1.34185	1.2693	0.948958	0.848062	0.778398	1.1612	0.761014	1.39873	1.05596	1.04443	0.994389	0.82271	0.901914	1.25416	1.22815	0.771944	1.27963	0.747979	0.934019	1.01525	0.563482	1.20321	0.918283	0.978978	1.02996	1.00151	1.07756	0.640782	1.03381	0.980978	0.463223	0.933689	0.715119	0.938191	1.21002	1.14458	0.786898	0.926383	1.20674	0.71204	0.981218	0.740823	1.20631
817	chr2	239218710	239771790	0.936082	0.807632	0.617254	0.581126	0.932381	1.29496	0.856554	0.840253	0.945386	1.07523	1.09549	0.910106	1.00635	1.04537	0.89492	1.10578	0.99468	1.19628	1.02353	0.954874	1.44126	0.786103	0.795441	0.608241	0.975173	0.701712	1.09413	0.851479	0.848764	0.794038	1.05137	0.712027	1.29075	0.872948	0.880417	0.883261	0.911551	1.0921	0.895965	0.442223	0.775282	0.776106	0.748884	0.992393	1.2568	0.875351
818	chr2	239771791	240310159	1.17063	0.807908	0.966667	0.787061	1.22166	0.802294	0.937685	1.01458	0.974221	0.972339	0.86961	0.964779	1.18791	0.735201	0.985962	1.03456	1.03856	1.34761	0.761627	1.14846	0.940315	1.03274	0.695609	0.994414	0.929336	1.04197	1.0579	1.39332	1.06339	0.749118	0.949038	0.963452	0.727559	1.04074	0.702051	1.17922	0.965359	0.95922	0.689069	1.15285	0.715173	0.863577	0.824018	1.06981	1.10611	0.902409
819	chr2	240310160	240890328	1.15678	0.56516	0.841629	1.01175	1.30039	0.850926	0.814452	0.67125	0.722392	0.886014	0.654574	0.858433	0.974298	0.763456	1.1255	0.782927	1.28146	1.35787	0.488906	0.627871	1.2976	1.09707	0.802041	0.47637	0.899981	0.931479	0.895354	0.50094	1.15065	0.799475	0.745383	1.22203	0.826284	0.876917	0.592252	0.54853	0.796191	1.05272	0.691789	1.23713	0.916781	0.457729	1.19182	0.58358	0.85024	0.734709
820	chr2	240890329	241439010	1.24087	0.963125	0.672355	1.04268	1.40761	0.672837	1.14484	0.923926	1.12149	1.24139	1.04862	1.20576	1.04067	1.06816	0.977313	0.923328	0.999937	1.19892	1.0547	1.4074	1.29261	1.04006	0.965826	0.932869	1.07237	0.973592	1.07912	1.22019	1.19168	0.913825	1.0756	0.846608	1.33211	0.820835	0.896743	1.02145	1.30246	1.31014	1.0792	0.650085	1.10212	0.782827	1.21312	1.00433	1.31346	1.03424
821	chr2	241439011	242020116	0.981089	0.776255	0.674207	0.817447	0.858739	1.12542	1.20417	1.09495	1.10694	1.37432	0.984203	0.688392	0.975918	1.11377	1.25551	1.07426	1.02746	1.3602	0.724528	1.04852	1.04064	1.11136	1.02506	0.786783	0.795485	0.769581	1.27035	0.909438	0.663743	1.30721	0.985195	0.747537	0.561751	0.822781	1.06825	1.09977	0.932315	1.10219	1.16229	1.06727	1.07869	1.19109	0.968922	0.75581	0.729872	1.10307
822	chr2	242020117	242585353	1.16714	1.05099	0.762055	1.05799	1.56532	0.605819	0.947854	0.803456	1.08108	0.961614	0.706177	1.3309	0.930067	1.02416	0.839684	1.22968	0.791657	1.76191	1.0732	1.81612	0.79156	0.955709	1.04352	1.22794	1.09226	0.989531	1.17093	1.19429	0.892601	0.770971	0.741933	0.981223	1.25075	1.20591	1.10408	0.835164	1.49082	1.17147	0.836001	0.950591	0.937658	0.73464	1.15041	1.18709	0.997198	0.94402
823	chr2	242585354	243199373	1.04808	0.760534	1.01649	1.33729	0.958279	0.883357	1.11832	0.930993	0.923005	0.967155	0.708405	0.83854	0.872148	1.06928	0.939731	1.2256	0.931088	1.34198	1.07419	0.945289	0.699898	0.957648	0.889164	0.460964	0.673768	0.998402	1.08337	0.914555	0.723145	1.25349	0.58809	0.780069	1.05028	0.899777	0.778409	0.714376	1.00361	1.40989	0.907474	1.22509	0.866504	0.911827	0.778268	1.12584	1.0754	0.698555
824	chr3	1	660048	1.26425	0.893082	0.699858	0.983476	0.660228	0.961897	0.84807	0.871985	0.903596	0.864874	1.22605	1.24024	1.08157	1.02592	1.07206	1.11298	0.834577	1.39403	0.876817	0.877285	0.742939	1.04989	1.13666	0.834058	1.03315	0.905222	1.01602	0.584118	1.06321	1.06549	0.819523	0.810819	1.06694	0.434918	1.07492	1.06682	0.857672	0.929298	1.17551	1.06537	0.848896	1.01898	0.909258	1.12016	1.18169	0.940433
825	chr3	660049	1278640	1.17513	0.922764	1.35525	1.13836	0.558716	1.98566	0.928558	1.1755	0.870544	1.16108	0.725216	1.30406	0.853958	1.05742	1.06757	0.911874	0.953272	0.832858	1.01141	1.08056	1.27132	0.890913	0.929921	1.27336	0.829466	0.967578	1.2227	1.08138	1.00495	0.965312	0.948666	1.4514	1.17611	1.25643	0.728248	1.04212	0.829878	1.12015	1.11625	0.820657	1.33408	0.888329	1.06034	0.831733	1.02544	0.946027
826	chr3	1278641	1911351	1.12919	0.920873	0.9456	1.32775	0.776668	1.30311	0.779077	1.09083	1.08846	1.01348	0.944444	0.824565	1.31385	0.889082	0.896515	1.06248	1.43976	0.576694	1.30086	1.3216	0.9787	0.968199	0.870286	1.29953	0.929719	1.21681	1.09897	0.991514	0.979237	0.860054	1.08861	1.07817	1.33715	1.24896	1.27044	1.21197	1.10055	1.00141	0.795703	1.28694	1.22798	1.22197	1.18159	0.871136	1.0382	0.937118
827	chr3	1911352	2514064	1.19034	1.30903	1.27241	0.967602	1.22943	1.0961	0.899112	0.96876	0.879486	0.97008	1.06174	0.993975	1.03327	1.14585	1.25161	1.87422	0.972986	0.668445	1.07436	1.34123	0.794459	1.00815	0.904288	1.11388	1.15474	0.981706	0.869499	1.22957	1.04971	0.829711	0.838782	1.20029	1.1024	0.896202	1.26991	0.875942	1.10989	1.15256	0.819456	1.15167	1.11307	1.31286	0.813351	1.17233	1.46682	1.25976
828	chr3	2514065	3097847	0.850712	1.10957	1.05058	1.288	1.13011	1.48165	0.83607	0.991631	0.980454	1.01039	0.851615	1.10994	1.18463	1.4197	1.03111	1.42417	1.05156	0.51416	0.975737	0.831691	1.08578	0.988719	1.28368	1.25232	0.919076	1.16485	1.128	0.90154	1.34482	1.412	1.05141	1.24546	0.958688	1.18951	1.4001	1.07673	1.0918	0.917283	0.845688	0.964517	1.01902	1.18972	0.789124	1.07855	1.14744	1.35362
829	chr3	3097848	3680588	1.44173	1.10282	1.29013	0.984009	1.188	1.42034	1.05327	1.39641	0.964606	0.767194	1.07143	1.20058	1.20078	0.92303	1.0095	1.17999	1.57936	0.633616	1.04571	1.30233	0.918838	1.01256	0.94068	1.11044	1.24346	1.03778	1.06584	1.10793	0.993331	1.44581	1.2215	0.894536	1.47666	1.25501	0.84177	0.866015	1.06445	1.24194	1.47653	1.22691	1.28677	1.22883	1.27427	0.967053	1.21478	0.799017
830	chr3	3680589	4287433	1.11581	1.17558	1.09904	1.50315	1.21895	1.20357	1.34323	1.12991	0.940803	1.39279	0.818461	1.48556	1.00932	1.24241	1.03591	1.31828	0.91917	0.685033	0.916427	1.02496	1.04632	0.938358	1.12042	1.28787	0.91445	0.883078	1.11244	1.07354	0.973109	0.709656	1.17212	1.01806	1.32045	1.20916	1.26773	1.00995	1.11248	1.16134	0.934676	0.959237	0.913071	1.19124	1.19656	0.878305	1.01561	1.57845
831	chr3	4287434	4854943	1.28255	0.889103	1.26301	1.16613	0.841086	0.848961	1.06206	1.15401	0.995793	1.07794	0.821731	1.34124	1.28648	1.4784	1.31498	1.2386	0.811142	0.895218	1.37481	1.06187	1.00715	0.920714	1.08724	1.16746	1.11615	1.24164	1.16877	0.90415	1.11246	0.879263	0.994904	1.11382	0.762578	1.50146	0.869842	0.648693	1.09525	1.27312	0.856995	0.880224	1.20724	0.927972	0.657182	1.22101	1.17163	1.55174
832	chr3	4854944	5426767	1.11269	1.2982	1.01972	0.679647	0.876081	1.17199	0.82269	1.04198	0.858039	0.801756	0.723328	1.03247	0.817542	1.269	0.892862	0.817144	1.00592	0.90528	1.15705	0.906863	0.757906	0.971022	1.03011	1.07387	1.23603	1.10757	1.16868	1.29483	0.880085	1.07074	0.9626	1.04259	1.20843	1.1918	1.3364	1.32077	1.5174	0.831282	1.17573	1.47998	1.18899	1.05151	0.831894	0.999306	0.803073	0.887601
833	chr3	5426768	6024881	0.954463	1.15149	1.1773	0.948083	1.45251	1.14925	0.942505	1.02455	0.881663	1.17019	1.56199	0.885072	1.11922	0.788637	0.821038	1.24639	1.49347	0.789785	1.12711	1.09664	0.775703	1.07289	0.804594	0.963979	1.04329	0.739512	1.04725	0.688531	1.07885	1.00764	1.02883	0.935454	1.11398	1.1021	0.784533	0.96482	1.20115	1.05606	0.981359	0.787579	1.50223	0.892874	0.639677	1.17932	1.37391	1.47666
834	chr3	6024882	6675420	1.10963	1.09582	1.08672	0.788727	1.04034	1.15154	1.15248	0.86149	1.07756	1.20609	0.88759	0.870537	1.04271	1.44098	1.13408	1.38109	0.996898	0.932415	1.46665	0.824003	0.907404	1.26596	0.956392	1.3173	0.94555	0.901911	0.819731	0.878799	1.2765	1.38124	0.807292	1.10112	1.1772	1.67878	1.62134	0.976837	1.15049	0.870996	1.00667	1.10863	1.03947	0.934551	1.26768	1.08921	0.990595	1.15084
835	chr3	6675421	7280214	1.33475	1.02085	1.16494	0.773441	1.40027	1.0373	0.783616	0.953056	1.00312	1.05829	0.975799	1.014	0.902174	1.46411	1.01017	0.908223	1.29797	0.823082	1.29404	0.865206	0.752165	0.923932	0.76445	1.20108	0.742115	1.06045	0.977184	1.19371	1.00269	1.16601	1.18936	1.45039	1.11627	1.2027	0.896455	0.854948	1.05573	1.17045	1.02896	0.544612	1.12835	1.15341	0.961674	1.15509	1.6076	0.873196
836	chr3	7280215	7879896	1.01957	1.05361	1.15001	0.997849	1.32501	0.880756	0.972533	1.06651	0.974731	1.11271	1.42631	0.911884	1.10327	1.38726	1.07389	0.856934	1.12415	1.04992	1.00835	0.6202	1.08701	1.17182	1.05643	0.883193	0.878233	1.00628	1.19609	1.12714	1.49128	1.15008	0.877904	1.33508	0.946055	1.10077	0.923956	0.897845	0.824247	0.882306	1.26678	0.691174	1.28324	1.76452	0.838461	0.881336	1.04934	1.34078
837	chr3	7879897	8466793	1.35197	0.834173	0.883529	1.25786	1.18899	1.1844	0.968498	1.05568	1.04576	1.03153	0.507031	0.947062	1.18497	1.10234	1.08041	2.1112	0.551285	0.939545	1.11836	1.00655	1.15908	0.952915	1.33375	1.43761	0.910929	1.36931	1.07956	1.40319	1.06975	1.0429	0.964094	1.05134	1.01859	1.18818	1.54393	1.29501	1.25863	1.05205	1.30871	0.949699	1.09622	1.16102	0.95876	1.12154	0.867487	1.17539
838	chr3	8466794	9004481	0.943551	1.14889	1.06268	0.949626	0.970413	0.913154	0.66808	0.929319	0.85712	1.01089	1.04654	1.38336	0.870915	1.2987	1.08747	1.03412	0.750621	0.779095	1.22037	1.49358	0.791929	0.903227	1.25668	1.26094	1.05651	1.05191	1.00652	0.792173	0.849927	0.987048	0.993419	1.26668	1.13676	1.22558	1.15718	0.742943	0.94441	1.03791	1.32089	0.851168	1.158	1.29661	0.978227	1.082	0.923758	1.34623
839	chr3	9004482	9536286	1.33478	0.945588	0.893707	0.827244	0.958513	1.01026	1.06682	0.769034	1.01065	0.888939	0.961686	1.21189	0.875289	1.03092	1.00987	1.29003	1.11072	0.931402	1.06551	0.763773	0.753167	0.967221	1.11325	0.736237	1.13235	0.886347	1.09883	0.553869	1.26182	1.22596	1.43668	1.12968	1.12393	1.1458	1.13584	1.27943	1.07297	0.946147	1.16434	1.24657	0.860308	1.43602	1.02391	0.990462	1.41081	0.804912
840	chr3	9536287	10105236	1.27546	1.21974	1.31984	0.969789	1.01611	1.70043	1.13082	0.920237	0.973952	0.948295	0.926582	1.0475	0.986121	1.17261	0.864062	1.36609	1.33549	0.880302	0.940642	1.04578	1.15183	0.928459	1.02775	0.918484	0.784608	1.18845	0.925475	0.978889	0.934083	0.934376	1.12221	1.26808	1.15427	0.639374	1.28868	0.928399	0.870327	1.03333	0.948941	1.28245	1.07193	1.22438	1.42729	0.972031	0.72261	1.27727
841	chr3	10105237	10636985	1.21451	0.907869	0.692623	0.596853	0.860271	0.81025	0.708859	0.78968	0.865258	0.820573	0.936423	1.20983	1.06934	1.01898	0.910389	1.24923	0.909821	0.851411	0.797931	0.954421	1.06215	0.902545	0.916905	1.25934	1.20727	1.11973	0.853555	0.732593	1.38953	0.918459	1.233	1.17363	1.25563	1.3556	0.874929	1.12654	1.08948	0.862454	1.28174	1.19557	0.830771	0.740865	0.928483	0.911014	1.0411	1.26432
842	chr3	10636986	11166312	1.35487	1.0382	0.904085	0.640978	1.08275	1.11413	0.86746	1.14149	1.08263	0.996011	1.20323	0.803875	1.16025	1.10955	0.856508	1.11268	1.28663	0.486418	0.780432	0.985452	0.760221	0.967094	0.890541	1.10989	0.997057	1.04831	1.06584	0.947974	0.857918	0.830742	1.06997	0.847069	1.05224	1.21737	1.00562	0.957426	1.04954	1.08015	1.26979	1.42555	1.09844	1.09336	1.1191	1.08851	1.46474	0.881698
843	chr3	11166313	11713576	1.11873	0.701704	1.15495	0.972842	1.06661	0.690375	0.889252	0.955308	1.00231	0.874659	1.2171	0.673914	1.326	1.54727	1.02772	1.33388	0.781642	0.802716	0.97239	0.73809	0.801837	1.16607	1.30849	0.875258	1.14986	1.26195	0.799677	0.820789	1.19135	0.940173	0.793632	1.49614	1.02601	1.40392	0.704355	0.681779	1.00171	1.03515	1.30597	1.10742	1.08741	0.802785	0.853925	1.00573	1.03227	0.985468
844	chr3	11713577	12278738	0.931998	0.776256	1.09194	1.08806	1.06073	1.05499	0.824015	0.932569	0.895011	0.822963	0.941991	0.913868	0.936117	1.01196	0.93684	1.19392	0.985841	0.717267	0.82991	0.818191	1.09569	1.01981	0.873962	1.25751	0.964711	0.857161	0.916734	1.47926	1.12067	1.93117	1.04978	1.16612	1.28727	0.774257	0.900056	0.91457	1.07418	0.824924	1.22479	1.04465	1.15492	1.04596	1.23547	1.11911	0.712038	0.855004
845	chr3	12278739	12846322	1.42218	1.39891	0.724558	0.980344	1.13219	1.01705	1.01658	1.13307	0.934903	0.846307	1.61242	1.59619	0.973413	1.50659	1.28093	1.24521	1.0618	0.830878	0.981686	1.0007	0.940665	0.983924	1.54773	1.20935	1.1169	1.10407	0.843268	0.791904	0.864689	1.07984	1.09817	1.27553	0.703594	1.65473	1.57466	1.01631	0.89701	0.832783	1.10673	1.07689	0.709199	1.03175	0.775308	1.31166	0.737658	1.57221
846	chr3	12846323	13381575	0.99432	1.14324	0.870176	1.15851	1.14615	0.912584	1.2137	1.07311	1.07249	0.864648	1.00021	0.966804	1.17965	1.14974	0.986864	0.859415	0.981706	0.851511	0.861031	1.12794	0.919708	0.901029	0.775056	0.801674	1.16366	1.03432	1.05874	1.21167	0.906156	0.918575	0.794885	1.07062	0.773087	0.747724	1.24026	0.862046	0.915886	0.904569	0.867055	1.20886	0.915977	0.810832	0.791036	1.3425	1.44986	0.746677
847	chr3	13381576	13918708	1.24595	1.33408	0.81429	1.27713	1.53746	0.832747	1.05171	1.10968	1.04656	0.663425	0.785181	0.690158	1.03415	1.25143	0.937074	0.870708	0.752257	0.616443	0.987483	0.978173	0.9054	1.16896	0.998484	0.935256	1.00325	1.01784	0.934873	0.618738	1.17689	0.982565	1.13898	0.941864	0.998324	1.53679	1.37935	0.66366	0.882715	1.27211	1.17047	1.12007	0.880363	1.17751	0.720147	0.820115	1.03304	0.828579
848	chr3	13918709	14494067	1.21804	1.09018	1.01092	0.849687	1.78407	0.886154	1.05103	0.986377	1.14882	0.74402	0.754021	0.859888	1.35712	0.764082	0.978253	1.23852	1.02676	0.431033	0.915638	1.18762	1.03989	1.03881	1.10299	1.26341	0.662531	1.12915	0.85045	1.1597	0.872809	1.26421	0.686379	0.679346	1.18193	1.1516	1.22571	0.581788	1.23532	1.17359	0.691793	0.89347	0.998117	0.801479	1.2263	0.925722	0.851147	1.16401
849	chr3	14494068	15035099	1.15551	0.999512	1.92515	0.888878	1.40986	1.25532	0.982026	1.13687	1.01783	0.829503	1.30088	1.13236	1.29643	0.794767	0.870826	0.862594	0.765115	0.743099	0.987134	1.48798	0.563607	0.969341	0.808205	0.689822	1.35952	1.03022	1.06762	1.14396	0.938495	1.00837	0.942303	1.10622	0.92174	1.32167	0.667168	0.436357	0.915281	0.893284	1.05237	0.881729	0.871096	0.876848	0.874242	1.20454	1.00165	0.636119
850	chr3	15035100	15572839	0.962271	1.15181	0.469767	1.39953	0.890655	1.13822	1.21042	1.26754	0.877619	0.725719	1.35577	1.27195	0.954108	0.943136	0.98017	1.30277	1.10701	0.750017	1.0544	1.26309	1.02134	0.872393	1.14152	0.846718	0.948008	1.03004	1.36409	0.738287	1.31604	1.17796	0.672993	0.847698	1.0784	1.25414	1.00198	1.43054	0.919514	0.986009	0.853265	1.04116	1.1317	1.00159	0.933596	1.26022	1.15322	1.34206
851	chr3	15572840	16128224	1.03265	1.10197	0.855695	0.527032	0.866234	0.896215	1.17105	0.95422	0.76037	0.510526	0.903399	1.20792	1.13258	0.928622	0.93569	1.19221	1.36526	0.655265	1.12367	1.1483	0.963412	0.78243	0.748655	0.538149	1.31495	0.856373	0.894866	1.08547	1.0779	1.20327	1.19128	0.749086	1.50715	0.881395	1.16196	0.692129	1.08909	1.22739	1.04563	0.85703	0.839772	1.16216	1.21169	1.05003	1.30034	1.35107
852	chr3	16128225	16653616	0.853596	0.924973	0.99287	0.877404	0.960252	1.20819	1.03342	0.845311	0.930976	0.758939	1.33052	0.790183	1.18069	0.88229	0.864754	1.41069	0.69029	0.774362	1.23602	0.994364	0.747219	0.89707	0.913767	1.16956	1.33379	0.995211	1.2449	0.843931	0.979162	0.907727	0.675541	1.18828	1.02471	1.46629	0.954673	0.610247	0.937065	1.28055	1.01208	0.91383	0.699388	0.6153	0.888832	0.770832	1.02114	0.849547
853	chr3	16653617	17187500	1.276	1.00585	1.33118	1.27089	1.13797	1.37611	0.872451	1.14225	0.992149	1.30061	0.806449	0.821278	1.5275	1.12576	1.26022	0.775624	0.678806	0.874167	0.82453	1.16223	0.836067	0.833139	1.18054	1.28471	1.31031	1.13258	0.977715	0.846434	0.764647	1.00274	1.0488	0.687169	1.07566	1.81465	0.675098	1.12	0.964978	1.28279	0.766267	1.08765	0.883614	0.951598	0.943087	0.932984	1.54069	1.15903
854	chr3	17187501	17781748	1.00944	1.40157	0.835689	1.27623	0.997151	0.985038	1.19781	0.903807	0.900569	0.728295	0.805717	1.04949	1.12969	0.864455	0.696635	0.935447	1.00293	1.11838	1.2538	1.01504	0.864728	0.933983	1.22109	0.850211	1.07954	1.03541	0.747769	0.941326	0.951508	0.687092	1.15299	0.8943	1.05953	1.22519	1.18398	0.947235	1.04504	0.800909	1.04741	0.915989	0.807209	0.712852	1.00112	0.844566	1.07227	0.619138
855	chr3	17781749	18313136	0.978948	1.21075	1.15058	0.872444	1.25815	1.39166	1.08594	1.06291	0.932263	1.03335	0.996629	0.991577	1.25072	1.05596	0.863296	1.36754	0.796392	0.799046	1.14013	0.968027	0.528759	1.06127	1.15279	1.25854	1.14664	1.05452	1.29504	0.963556	1.14166	1.11994	0.707392	1.02405	0.855758	1.09777	0.919172	0.888582	0.717625	1.02131	1.07594	1.13423	1.17019	0.679783	1.05841	0.97545	0.86882	0.960938
856	chr3	18313137	18873202	1.36061	0.810533	1.21985	0.571047	1.16651	1.11106	0.867632	1.22421	0.902625	0.933323	0.885414	1.18232	1.09614	1.29544	0.944801	1.46416	1.05996	0.615998	1.28267	1.08714	0.926856	0.857064	1.01879	1.00901	0.824327	1.14496	1.05723	1.07739	1.13727	1.17837	1.09761	0.678712	0.746577	1.01609	1.18186	1.14841	1.20829	1.1404	0.790292	1.22031	0.902501	1.58892	1.04093	0.915318	1.30533	1.1148
857	chr3	18873203	19482567	0.942411	1.13196	1.15761	1.3243	0.792783	0.94362	0.946723	1.22341	0.693385	1.25543	1.17489	1.25582	0.935806	1.07187	1.11789	0.905753	1.3546	0.915808	1.05719	1.2122	0.888079	0.862784	0.802649	0.961853	0.970262	1.2786	0.911785	1.12514	1.33661	0.722231	0.753728	1.22402	0.934383	1.18611	0.894376	0.782814	0.923612	0.914158	1.27918	1.06335	0.778357	1.18786	1.18162	0.98497	1.05152	1.49325
858	chr3	19482568	20117630	1.00779	1.31104	1.46579	1.12298	0.865321	1.26503	0.762468	1.09202	0.9353	0.897538	1.41399	0.776194	0.810123	1.16081	1.42611	1.25241	1.29775	0.74169	0.821518	1.20442	1.12637	1.07382	1.02353	0.924706	1.06506	0.991239	1.08355	1.18967	1.08079	1.27069	0.966096	0.772478	1.00338	1.28456	0.996888	0.804943	1.12947	0.945154	1.03863	0.997141	0.659147	1.04007	0.929656	0.941436	1.15826	0.99235
859	chr3	20117631	20708255	1.45606	1.54205	0.888791	1.07936	0.932723	1.50064	0.863866	0.841115	1.05616	1.13368	1.31027	1.40725	1.39681	1.43601	1.04884	0.888743	1.15869	1.05118	0.845505	0.943785	1.27455	1.11814	0.795509	1.20733	1.49977	0.893373	1.14095	0.886617	0.958513	1.13619	1.01312	1.16547	1.23072	1.32296	1.0194	1.41148	0.82511	0.785115	0.839642	0.862468	1.31213	1.16597	0.916796	0.9169	0.942415	1.11433
860	chr3	20708256	21319187	0.935162	1.11938	0.897153	0.859892	1.28601	0.73133	1.10409	0.840269	1.13046	1.10895	0.861543	0.902427	0.858533	1.38633	0.771547	0.87191	1.18462	0.868429	0.930782	0.821435	1.13513	0.850335	0.966904	1.5081	0.767428	1.10535	0.852633	0.978694	0.83043	0.891007	1.05545	0.980202	1.188	1.33846	0.937445	0.759435	0.900724	1.18606	0.896249	0.806186	0.918594	1.01742	1.22314	1.13567	0.796598	1.01194
861	chr3	21319188	21891695	1.3552	1.18052	0.770004	1.41094	0.688268	0.704109	1.41205	1.07795	0.916681	0.714592	0.947095	1.13347	1.17759	1.12223	1.02296	1.06201	0.65933	0.8472	0.805358	0.791666	1.004	1.028	0.9349	1.18902	0.964537	0.95123	0.843618	1.22067	1.07127	1.07392	1.34515	1.10037	1.24796	1.56376	1.18155	1.25659	0.957584	0.754706	0.977721	0.902688	0.858062	0.652857	0.909337	1.14599	0.734308	1.30845
862	chr3	21891696	22492553	1.2907	0.877266	0.810337	0.842734	0.872077	0.874574	0.928348	1.00448	0.997907	1.05928	0.875398	0.991442	1.16566	1.08888	1.07195	1.24932	0.895398	0.951022	0.828605	0.940487	0.958178	0.856241	0.99433	1.22081	0.864792	1.00813	0.894254	0.877609	0.954725	1.12666	1.0552	1.1942	0.998094	0.961712	0.922318	1.1854	0.721172	0.933198	0.718139	1.23734	0.980149	0.791915	1.00929	1.16555	0.764716	0.988474
863	chr3	22492554	23110221	0.936023	0.986536	1.13967	1.0614	0.893314	1.18225	1.07323	1.19559	0.876709	1.17395	0.904337	0.865054	1.02207	1.06842	0.65654	1.02591	0.921966	0.661718	1.14382	0.770657	1.1857	0.91926	0.760963	1.03022	0.834843	0.837012	0.900083	0.837475	0.94275	0.747074	0.664042	0.747815	0.935006	1.1689	1.20109	0.581084	0.83457	0.8719	1.04949	0.677917	1.98406	1.08725	0.615751	1.28437	0.94323	0.822371
864	chr3	23110222	23681751	1.39964	1.39327	0.752701	1.28885	1.2569	0.943578	1.15867	1.13591	1.00343	1.02849	0.989594	0.877135	1.12825	1.08646	1.134	1.51837	1.21121	0.837299	0.808924	1.17683	1.09669	1.01554	1.08559	0.74916	0.843277	1.06322	1.03795	1.20981	1.57864	1.2363	1.01006	0.927888	1.0123	1.2322	0.772175	0.746142	1.00007	1.09511	1.62446	1.20684	1.04557	1.08235	1.00228	1.04261	1.2468	0.853263
865	chr3	23681752	24242833	0.761631	0.867429	0.966646	0.867457	0.76709	1.15226	1.16272	1.30238	0.881628	0.909606	1.152	1.07744	1.09445	1.12082	0.948214	1.21709	1.11634	0.755716	0.907222	0.757435	0.981453	0.821362	0.981567	1.57311	1.17723	1.01815	1.15149	0.766311	1.08114	0.853004	0.986807	0.893382	0.531105	0.840045	1.26827	1.00114	1.15052	0.871169	1.0769	1.02835	1.16168	1.44942	1.08681	0.885844	1.05492	0.951966
866	chr3	24242834	24793772	1.06015	0.997828	1.17044	0.742701	1.05145	0.917121	0.918036	1.06306	0.963912	1.11928	0.895205	0.933093	1.06464	1.16732	0.939546	0.9525	1.20666	0.917935	1.14325	1.2462	1.30628	0.979197	1.08453	1.14648	1.06507	1.05839	0.860377	0.879129	1.00733	0.539736	0.870703	0.877143	0.913978	1.19564	1.00357	0.729373	0.949088	1.00351	0.869796	0.623174	1.07351	0.983487	1.08937	1.14814	1.19412	0.865175
867	chr3	24793773	25369035	1.13622	0.80175	0.761517	0.737934	0.763669	1.17879	1.05353	1.00395	1.08924	1.17581	1.01388	0.922571	1.02203	0.88612	0.905778	0.889331	0.880806	0.789567	1.12256	1.12027	0.974557	1.08575	1.02047	1.20761	0.948864	0.906094	1.15925	1.04644	1.33623	1.19655	1.07858	0.858465	1.11798	0.939362	1.34033	0.964815	1.02622	0.865814	1.02535	0.921886	1.25214	1.16645	1.40065	0.899601	0.812191	0.786342
868	chr3	25369036	25901991	1.48884	1.04993	1.19453	1.49039	1.46481	1.26428	1.0827	1.09918	1.00891	1.20328	0.982666	1.04258	1.32427	1.30467	1.02502	0.968445	0.607418	1.04981	0.956344	1.05925	1.11615	1.07542	1.15041	0.775563	1.22159	1.07215	1.40477	1.01192	0.971755	1.39007	1.06013	0.907574	1.50649	1.30829	1.06639	1.12406	1.06053	0.987949	1.07519	1.35573	0.94054	0.957077	1.18745	1.21272	0.967676	1.03075
869	chr3	25901992	26491080	1.25884	0.831226	1.26295	0.750791	0.702625	1.02095	1.01193	1.01759	1.05531	0.993642	1.04974	0.973005	0.92185	0.859298	0.893695	1.25472	0.995434	0.804658	1.01951	0.713874	0.708531	1.09182	0.935748	0.908606	0.787845	0.884978	1.0062	0.930865	1.03597	1.36563	0.793611	1.20484	1.01303	0.875754	1.1184	0.822919	0.961105	0.918266	0.876451	0.767813	0.681113	1.55147	0.88918	1.03948	1.40732	1.07165
870	chr3	26491081	27100033	1.12459	1.05666	0.875085	1.21528	0.749607	1.11073	1.1533	1.2112	1.08052	1.39935	1.0488	1.19042	1.15026	1.30876	1.0384	0.945659	1.48836	0.689774	1.04771	1.06838	0.962214	1.14294	0.933999	1.14675	0.871266	1.08084	1.14064	0.927671	1.15413	0.922512	0.992301	0.823171	0.941798	1.69767	1.27569	0.680867	0.867487	0.998417	1.19061	0.920231	0.97791	0.997001	1.34507	1.17462	1.1985	1.12764
871	chr3	27100034	27683745	0.913272	1.34876	1.16241	1.29873	0.738621	1.17254	0.82791	0.975967	1.09874	1.04202	1.0521	1.36871	1.07152	1.06526	1.10836	1.34759	0.970758	1.06937	0.883495	0.842698	1.0569	0.902067	0.953619	1.05618	1.26421	1.03664	1.03429	1.18777	0.950841	0.953991	0.917081	1.48414	0.931643	1.80474	1.08151	0.829476	0.902302	1.00765	0.890349	0.935525	1.08425	1.16309	1.08983	0.930923	1.55975	1.0447
872	chr3	27683746	28265448	0.870831	1.06703	1.19991	1.37467	1.14683	0.919862	0.923535	1.09359	1.05836	1.37723	1.24069	0.628127	0.886213	1.28865	0.987409	0.440852	0.696155	0.98648	0.87527	0.925471	1.02664	0.903371	1.10317	0.851137	0.809775	1.286	0.853396	0.901477	0.88543	1.20651	0.96974	0.867516	0.881179	1.874	1.28909	0.798776	0.587103	0.931867	1.148	1.43845	1.42371	1.04253	1.29434	0.863423	1.29494	0.792528
873	chr3	28265449	28850041	0.89167	0.821033	0.957049	0.886025	1.01239	1.13256	0.920227	1.019	0.983297	0.92074	1.31628	0.925124	0.858659	0.965291	0.756165	1.19505	1.30311	0.742578	0.915832	1.08788	0.990367	0.863774	1.1804	0.979321	1.08704	1.05467	0.907681	0.887568	1.27013	1.0691	0.923694	1.06933	1.00896	1.30504	0.849611	0.973063	1.12921	0.968631	1.0573	0.96372	1.42277	1.1306	1.19783	1.03401	1.0834	1.31371
874	chr3	28850042	29391959	1.04293	1.04044	1.12036	1.07231	1.19119	1.07148	0.982495	1.05588	0.825389	0.85622	1.16374	0.935238	1.00419	1.02846	0.952431	1.10895	1.54253	0.675495	0.789157	0.897696	1.06276	1.21786	0.924972	0.920759	1.49635	0.918747	1.0355	0.991766	1.01096	0.825943	0.877355	1.06733	0.834417	1.10233	1.0366	0.921885	0.696358	1.17631	0.756041	1.20357	1.04808	0.937698	0.986166	0.865293	0.920522	1.01024
875	chr3	29391960	29963758	0.964911	1.03087	1.71931	0.743348	1.07016	1.12736	0.693645	0.903892	0.980274	0.811462	0.916523	0.90649	1.13708	1.14197	0.929474	1.06332	0.905779	0.466374	0.924349	0.887442	1.0424	0.819001	0.961025	1.05425	1.25882	0.814816	1.13388	1.01127	1.2453	1.39838	1.04115	1.45965	0.830551	0.898452	1.22367	1.22994	0.781027	0.891535	1.486	0.8662	1.14948	0.924673	0.88327	0.872899	1.02681	1.00028
876	chr3	29963759	30511103	1.38126	0.919186	0.942244	0.73457	1.19385	1.10062	1.13185	0.960572	1.00266	1.01711	0.823635	0.593432	1.04548	1.29827	0.919488	0.876585	1.23957	0.697345	1.03119	0.811581	0.892957	0.796442	0.77612	1.19113	0.797026	1.13363	0.84038	1.26053	1.38032	1.05114	1.05185	0.840846	0.824444	1.10966	1.13879	1.1357	0.885329	1.07039	1.1914	1.07371	0.809829	0.766541	1.03862	1.00051	0.886732	0.852362
877	chr3	30511104	31061432	1.48569	0.904914	0.840188	1.00896	0.868077	0.82671	1.09154	0.928385	0.998681	0.848273	1.19109	1.1891	1.01661	1.0168	0.907091	1.17974	0.822743	0.874457	0.900824	1.10017	1.12542	1.10867	0.860121	1.30086	0.648017	0.904151	0.939709	0.742804	0.990743	0.883554	0.662005	0.824311	0.85111	0.85447	0.817232	0.923379	0.753323	0.855217	1.18726	0.914974	0.942835	0.988537	0.959193	1.323	1.16056	0.711036
878	chr3	31061433	31589827	1.28307	1.10262	0.943839	0.906384	1.07505	0.881804	0.954009	0.829549	0.945075	1.06471	0.821952	0.941757	1.25298	1.10053	0.895101	1.08213	0.862214	0.560682	1.06051	0.822316	0.819713	1.11906	1.26308	0.852601	0.916093	1.01192	0.732197	1.01282	1.14665	1.01539	1.26638	1.07962	0.830887	1.29001	1.2497	0.667829	0.872981	0.640983	0.749803	1.00183	1.04112	1.02089	0.884205	1.02085	1.14892	1.0433
879	chr3	31589828	32156968	1.22891	1.37827	0.851514	1.009	0.818344	0.951942	0.823536	0.988122	1.00789	0.926164	0.976641	1.1044	0.904966	1.0474	1.03239	1.07527	1.088	0.788666	1.06894	0.985775	1.03942	0.993641	0.934811	1.23048	1.11493	0.997677	1.13042	1.38216	1.21542	1.37978	0.794739	0.863565	0.872951	1.15771	1.17019	0.770761	1.30472	1.18238	0.987552	1.06554	0.864012	1.19078	1.19592	0.661962	1.18469	0.930519
880	chr3	32156969	32719097	0.957903	1.05374	1.06624	1.23113	1.13726	1.0719	1.15549	0.892029	1.10524	1.06203	0.987385	0.946314	0.937501	0.846475	0.801654	1.2778	1.50963	0.911553	1.1797	0.727903	0.917615	0.929248	0.808992	0.926439	0.933734	0.903206	0.756729	0.997777	1.40484	0.831994	0.929248	1.24192	0.996355	0.709764	1.24545	0.72924	1.25419	1.23421	1.28163	1.2798	1.00683	0.952377	1.2331	0.81469	0.875938	1.20853
881	chr3	32719098	33309540	1.23814	1.25854	0.938923	0.930375	0.884265	1.0487	0.775764	1.1233	1.03466	0.938228	1.04932	0.965869	1.0685	1.11313	0.969953	1.54027	0.67315	1.08973	0.992601	0.921338	0.845992	0.874112	1.12968	0.822565	0.955802	0.966633	1.03033	0.74683	1.19169	1.30988	0.697929	1.19364	0.945161	0.984594	0.851895	0.783511	1.09525	1.11634	1.04109	1.05096	0.916114	0.988041	1.16997	1.01078	0.98825	0.940711
882	chr3	33309541	33895103	0.961138	1.36083	0.724508	1.18612	1.01859	0.976159	0.836732	0.879039	0.756184	1.03481	1.11704	1.15124	0.960846	0.692938	1.0244	0.782228	0.970199	0.912735	1.00318	1.10766	0.98332	0.969685	1.13513	1.282	1.06187	0.989606	0.813351	1.27971	1.31818	0.928801	0.922581	1.38592	1.63624	1.40408	0.877933	0.882009	1.32181	1.29943	0.922401	0.906644	0.729619	1.15583	0.819146	1.06503	1.09796	0.840834
883	chr3	33895104	34452693	1.10444	1.02743	1.10147	1.06164	0.763615	0.881432	0.88428	1.01207	0.993942	0.938231	1.24619	0.776766	1.06156	1.20705	1.10759	0.950233	0.860916	0.852745	1.04614	0.982639	0.99315	1.07924	0.853744	0.872527	0.807255	0.933939	1.02875	1.03783	0.712931	0.984202	1.08601	1.20299	0.945755	1.25562	0.840987	0.643497	0.79179	1.04166	0.632912	0.838488	0.827539	0.888528	0.988193	0.877464	0.656721	1.06525
884	chr3	34452694	35081101	1.05309	1.44941	1.2314	1.32079	1.26365	1.04447	1.07164	0.875322	1.0794	1.20883	1.17319	0.999927	0.921692	0.735795	0.912068	1.39345	0.593877	0.708564	0.94354	0.783619	1.22325	0.684014	1.04782	1.0146	0.897277	0.899324	0.848361	1.09674	1.06147	1.65167	1.04202	1.20547	1.06043	1.05953	1.03634	1.7459	1.06987	1.09659	0.92542	1.1661	1.02161	0.984183	0.785977	1.04017	1.07793	0.514801
885	chr3	35081102	35720734	1.04753	0.76403	0.740056	0.851864	1.32156	0.885047	0.71925	0.85872	0.966673	1.27594	1.13105	0.662506	1.14477	1.10339	1.17124	0.90599	0.944264	0.994659	0.72057	0.974322	0.839279	1.07965	0.969924	1.06371	1.25144	0.88948	0.861121	1.04605	0.999831	1.04675	1.40759	1.09886	1.2056	1.24399	1.12543	1.30069	1.17871	1.09392	1.31761	0.733528	1.14508	1.14098	1.22718	0.859346	0.764867	0.965084
886	chr3	35720735	36313704	0.925234	1.27494	1.24693	1.00228	0.960434	0.685072	1.0343	0.92467	0.999467	0.767557	0.872773	1.28612	1.12503	0.958956	1.16264	0.895598	1.09909	0.800088	0.895076	1.07552	1.19101	1.11115	1.21838	1.04279	1.28442	0.993635	1.22463	1.33963	1.13777	0.77641	1.01248	1.1033	1.10243	1.39358	1.3406	0.735672	1.1211	0.829233	1.00499	1.08786	1.43099	1.1073	1.47795	1.10002	1.42419	0.911374
887	chr3	36313705	36889229	1.14558	1.07706	0.780363	0.984093	1.05791	0.922912	1.08225	0.895184	0.895995	0.928709	1.0748	1.12157	0.885525	0.878802	0.846618	0.931877	1.18912	0.771152	0.857368	1.07931	1.19599	1.01678	1.04882	0.66885	1.21314	1.16793	1.0119	1.3506	1.28058	1.0014	0.961028	1.03058	1.20969	0.991393	1.21157	0.738671	1.11678	1.04983	0.985458	0.954251	0.971893	1.08019	0.959255	1.11947	1.34918	0.862301
888	chr3	36889230	37442923	1.2685	1.20057	1.05816	0.807809	0.808007	0.860117	1.00912	0.986077	1.06192	1.04895	1.01275	0.762728	0.912793	0.929676	0.569604	0.732071	1.26117	0.852454	0.95273	0.971306	0.915566	0.98391	1.07097	0.964234	1.07657	0.991279	0.922732	1.00864	0.98779	1.15726	0.867886	1.16979	0.935919	0.908432	0.851798	0.673616	0.907659	0.843215	1.25044	1.02448	1.06844	0.965281	0.750974	0.937019	0.884459	0.833371
889	chr3	37442924	37983589	0.93973	1.10464	0.921639	0.938217	1.10766	1.04291	0.9063	0.965336	0.916017	0.830259	1.19457	1.0932	0.787564	1.33898	0.938067	0.865144	1.11004	0.80133	0.952836	0.922755	0.680207	0.900876	0.861946	1.15722	1.25608	0.793048	0.83712	0.71354	0.988033	0.675242	0.844514	1.01564	0.865703	1.47622	1.39937	1.1478	1.26234	0.946004	0.896314	1.34461	0.874056	0.807733	1.09989	1.16192	0.748451	1.35765
890	chr3	37983590	38522674	0.854748	0.585249	1.27112	0.88996	1.00247	0.92096	1.05107	1.00398	0.854402	0.715282	0.691058	1.30053	1.16539	1.07848	0.982254	0.863008	1.00995	0.597283	0.96964	0.881249	1.42219	0.948588	1.01451	1.15183	1.07385	1.01717	1.08772	0.98397	1.19482	0.467938	0.942518	0.845389	0.742127	1.27491	0.889818	0.737955	1.26049	0.957836	1.25224	1.45921	0.972944	0.876056	0.930803	1.06343	1.0733	1.44752
891	chr3	38522675	39063771	1.21515	0.937553	0.905904	0.986155	1.12566	1.00857	0.870665	0.929389	0.981328	1.23728	0.848056	0.922264	1.08798	1.03994	1.13397	0.97397	0.811308	1.11713	1.34837	1.36949	0.723453	0.975088	0.869557	0.701712	0.717931	0.826082	0.771163	1.40479	1.16987	0.824184	1.14274	1.03634	1.04461	0.991924	0.8926	1.28097	0.840857	1.15754	1.3475	1.32365	1.18787	0.909264	1.10142	1.19802	1.10949	0.848881
892	chr3	39063772	39637072	0.979612	0.742602	0.884576	1.02604	0.656914	1.35472	0.75275	0.948772	0.880686	1.10977	1.1985	0.770074	0.975571	0.701971	0.732185	1.31878	0.860241	1.02049	1.30754	1.03835	1.07486	1.10848	0.807689	1.06392	0.982068	1.21252	1.12592	0.821389	1.38817	1.88033	0.907382	0.911194	0.637635	1.0648	0.863607	1.0945	1.24946	1.19903	0.96451	1.06689	1.21082	1.36711	1.51163	0.974192	0.806534	0.941527
893	chr3	39637073	40243321	1.18956	0.784481	0.80508	0.888158	0.951483	0.967221	0.80674	0.936719	0.876984	0.837774	0.793666	1.17534	0.831838	1.02658	1.05873	0.697362	0.82687	0.927148	0.871797	1.25057	1.0915	1.10598	0.937846	0.891767	0.96197	0.906606	1.23936	0.54218	1.45439	1.10599	1.4823	0.852626	1.15183	1.19857	1.10779	1.25309	0.958012	1.19358	1.28111	1.22582	1.29665	0.785192	0.694508	1.05312	1.51331	0.915862
894	chr3	40243322	40810171	1.21652	0.941709	0.807885	0.987729	0.945699	1.12498	1.30904	0.83833	1.03174	1.00291	0.879803	0.509209	1.11937	1.26629	0.986061	0.997981	1.17139	1.05554	1.18529	0.836458	1.06747	0.894635	0.972904	0.924713	1.03267	0.763316	0.964719	1.4835	0.955635	1.2357	1.05854	0.997325	0.812487	0.966184	1.10258	0.978608	1.05845	0.952471	1.18334	1.24567	0.766599	1.01471	0.771785	1.28886	1.10631	0.994727
895	chr3	40810172	41355744	0.886559	0.832645	1.03958	0.914904	1.36805	1.01955	0.953422	0.879786	1.09487	1.32277	1.12627	0.996097	1.11496	1.25024	1.20997	0.962643	0.956065	1.15876	0.968725	1.17699	0.634569	1.10583	0.847922	1.40117	1.23003	1.123	1.06898	1.05937	1.1044	1.1059	0.972246	0.915823	0.846204	1.04406	0.922894	1.43161	0.901746	1.1111	0.711581	0.989319	1.23306	1.17781	0.614203	0.775926	0.962841	1.08453
896	chr3	41355745	41945397	1.05389	0.92582	1.33042	1.0126	1.27348	1.0067	1.455	0.939346	0.859303	0.901054	0.881914	1.01826	1.10735	1.14667	1.0925	0.999319	0.75257	0.987983	1.18706	0.922319	0.625883	1.00101	0.785127	1.06755	0.738705	0.990383	1.03682	1.27355	1.28038	1.0528	1.14601	0.991432	1.05371	0.908158	1.30839	0.993921	0.763665	0.988456	1.28368	1.19581	1.36529	1.14059	1.3056	1.51723	0.712639	0.91974
897	chr3	41945398	42499187	1.31465	1.17787	1.20382	1.21321	0.882333	1.17892	1.31286	1.0229	1.04409	1.01546	0.825732	0.784554	1.04284	1.14954	0.871906	1.04705	0.902053	0.787691	0.932454	1.02976	0.761574	1.06643	1.00119	1.05474	1.44438	0.990969	0.963894	1.25431	0.940807	1.00684	1.132	0.842115	0.990331	0.798725	1.02261	1.18852	1.15948	0.681462	1.38672	1.13871	1.09268	1.08438	1.06402	0.769942	1.34435	1.06645
898	chr3	42499188	43056167	1.09609	0.814523	0.964438	1.01899	1.1073	0.845359	1.30108	1.03506	0.846361	0.797512	1.0994	1.04724	1.12177	1.23533	0.726394	0.784165	0.940544	1.53359	0.965981	0.922914	0.964287	1.16219	1.0494	1.28692	1.6162	0.975364	0.983737	0.844728	1.06306	1.21112	1.18691	1.38742	1.11894	1.34425	1.03134	1.12762	0.959933	0.844264	0.875649	1.32065	1.0897	0.897934	1.01438	0.873712	1.42322	1.10809
899	chr3	43056168	43587896	0.861747	1.29452	0.831379	0.95777	0.779505	1.26197	1.4154	0.912774	0.980718	1.1682	0.848738	0.641246	0.815352	0.719137	0.892598	0.611981	1.32369	1.36888	0.984985	1.23064	1.12531	1.01654	0.842008	1.16959	0.977564	1.23752	1.1262	1.05948	1.02843	0.930733	0.918429	0.909891	0.66222	1.45971	1.05397	0.669742	1.12594	0.536805	0.873767	1.11782	0.543341	1.10893	1.04453	0.797922	1.3944	1.24539
900	chr3	43587897	44124223	1.23107	1.09724	1.12094	1.26147	1.01165	1.11206	0.781478	1.08662	1.0922	1.02522	1.16302	0.638289	1.1027	1.40715	0.948668	0.76865	1.13824	0.995299	1.38141	0.894615	0.898491	1.13609	0.916393	0.929861	1.04665	1.0798	1.04886	1.25916	0.962716	1.06959	1.20811	1.00951	0.79937	0.982511	1.03655	1.23516	0.687985	0.948426	1.11331	1.28546	0.91582	1.19654	1.10106	0.82154	1.14816	1.15545
901	chr3	44124224	44679167	1.09834	1.05861	0.979686	1.56595	0.881517	0.899321	0.898998	0.733877	0.967391	0.828537	1.27943	1.01089	1.23781	1.01008	1.12327	1.25117	0.951784	1.17522	0.741907	0.943717	0.697897	0.917782	1.19764	0.941763	0.693389	0.786329	1.03942	0.930167	1.05885	1.43879	0.813839	1.0034	1.41602	0.784611	0.875135	1.01676	0.967821	0.978092	0.909508	1.07293	0.980702	0.998361	0.575693	1.31848	1.20612	0.931379
902	chr3	44679168	45202134	1.46117	0.870339	0.92814	1.12124	1.26001	1.17852	0.82751	0.823544	0.98481	1.05705	0.965441	1.00567	1.09548	1.1823	0.705754	0.555471	0.619803	1.2791	1.14892	0.881876	1.01458	1.09306	0.745621	0.654943	1.14798	0.862107	0.943021	0.875278	0.974871	1.16605	0.702748	0.916868	0.820966	1.04955	0.973082	0.85704	0.721494	0.797595	1.10558	1.22854	0.907048	1.13955	1.26794	1.05012	0.955817	1.20302
903	chr3	45202135	45720895	1.03274	1.27019	0.980192	0.92142	0.689029	0.949856	0.78927	1.04826	0.944227	1.065	1.07462	0.901842	1.11374	1.17273	0.878765	1.36804	0.735043	1.35419	0.96921	1.04497	0.804667	1.1338	0.892914	0.995084	1.02742	1.11894	1.14809	1.3019	0.911032	0.862828	1.11676	0.941453	0.792295	1.04961	1.30389	0.604517	0.990595	0.831717	1.32587	0.830193	0.605941	0.853783	1.12872	1.14214	1.32403	0.859293
904	chr3	45720896	46235561	1.02962	0.930814	0.907942	1.05042	0.982647	0.714853	0.852939	1.07115	0.965884	0.855226	1.10337	1.15039	1.5923	1.07895	0.529134	1.38907	1.42217	1.11035	1.17188	0.8816	1.08446	0.932503	0.837722	0.694443	0.830428	0.798887	1.04885	0.969641	1.10959	0.862173	0.711021	0.968583	0.962919	1.20893	1.16592	1.00808	0.893326	0.945711	0.98643	1.05834	0.812886	1.2104	0.930797	1.24614	1.1063	1.0522
905	chr3	46235562	46779957	1.18869	1.06032	1.10494	1.24267	1.20492	1.46466	0.995143	0.845795	0.969514	1.05085	1.23784	1.07375	1.01387	1.14922	0.986876	0.791068	1.42061	1.39726	0.894743	0.999524	0.89274	1.01775	1.05156	0.82421	0.814296	1.02133	1.13793	0.644573	0.962063	0.721627	0.987293	1.0705	0.997351	0.865658	0.891239	0.731365	1.06561	1.00924	1.04009	1.18639	0.752385	1.02884	1.03677	0.805915	0.671987	0.818608
906	chr3	46779958	47357350	0.959207	1.00961	1.34265	1.18443	0.626225	0.839061	0.927779	1.07038	0.807232	1.20838	1.4553	0.842548	0.868929	1.11562	0.995595	0.901185	1.33011	1.17887	0.916843	0.988407	0.884718	1.03036	0.867339	0.720951	1.07668	0.880625	1.09664	0.849375	0.883296	0.969386	0.869125	0.810206	0.99537	0.608795	0.827505	1.38193	0.750621	1.06853	1.44914	0.91804	1.01363	0.932831	1.18569	0.980397	0.823249	0.90508
907	chr3	47357351	47942045	1.14548	1.24093	0.633093	0.789744	0.815397	0.661081	0.938457	0.846087	0.952635	0.53964	1.10125	0.702896	0.974733	1.21046	0.950864	1.33311	1.09931	1.40847	1.30722	0.76721	0.944059	1.08824	1.09473	0.974114	0.929608	1.01252	1.00478	1.25817	1.12901	1.46546	1.03099	1.06376	0.944625	1.17728	1.24018	0.47375	0.694143	1.16808	1.2283	0.829843	0.95191	1.41457	0.853827	1.15266	1.10602	0.984766
908	chr3	47942046	48533983	1.15508	1.20934	0.945355	0.744318	1.31354	1.227	0.844718	1.09231	0.997214	1.17343	0.975137	1.21913	1.30814	1.08067	0.470351	1.25716	1.01263	1.19353	1.09221	0.773268	1.34146	0.949486	0.76629	0.869797	0.856172	1.00035	1.05795	1.17475	1.02419	0.576916	0.770107	0.946773	1.12976	0.929576	1.24317	1.19395	1.06759	0.999876	1.3043	1.20969	1.00344	1.30733	1.2102	1.32846	0.928177	0.970868
909	chr3	48533984	49128224	1.25582	1.35011	1.26733	0.912941	0.878682	0.978915	1.013	0.987016	1.16768	0.901499	1.01419	0.850152	0.643699	0.674186	0.933365	0.630295	1.072	1.3026	0.955152	1.1521	0.974784	1.04478	1.02448	1.17695	0.978691	0.792364	0.972819	1.20423	1.22343	0.941047	1.24436	0.698322	1.26959	0.905935	0.805587	0.949765	1.00268	1.46567	1.30698	0.831379	0.984971	0.739919	1.35468	1.55008	0.995378	1.59935
910	chr3	49128225	49704877	1.04541	0.723873	1.02047	1.03654	0.789011	0.476296	1.02078	1.09873	1.04107	0.807127	0.894293	0.990618	1.17943	0.712083	0.836525	1.18883	0.992841	0.908673	1.09291	0.634217	1.02263	1.03088	1.23138	0.824159	0.947499	0.970239	0.773162	1.06524	1.48327	0.828469	0.98401	0.745624	0.802607	1.4145	1.19026	1.04568	0.976617	1.1459	0.937544	0.938814	0.756414	0.958594	0.653068	1.06443	0.654622	1.05519
911	chr3	49704878	50260844	0.87989	1.04543	0.85263	0.760708	1.16747	1.18033	0.900948	0.980602	1.09341	1.29034	1.31769	1.4744	1.19121	1.36554	1.05998	1.49166	1.13466	1.15794	0.942149	0.744732	1.2186	1.05196	1.19722	0.862132	0.800454	0.993109	1.23522	1.20663	1.17849	1.11027	1.14091	0.747874	0.770884	0.880915	0.883402	1.35819	1.0706	0.824446	0.845343	1.36261	1.11856	0.911601	0.781723	0.96873	0.878765	1.05397
912	chr3	50260845	50797501	1.19895	0.946518	1.14374	0.756584	1.01914	0.560623	1.12542	1.0936	0.90602	0.693141	1.08789	0.769894	0.995854	0.977423	0.942359	1.10475	0.703354	0.949899	0.966476	1.00178	0.702702	1.01862	0.677983	1.33139	0.895381	1.29382	1.17384	0.734243	1.3651	1.18151	1.04828	0.810655	0.744601	0.758682	0.913383	1.34049	0.998451	1.03773	0.728927	0.977482	1.3434	1.19599	1.15784	0.761566	0.70498	0.817501
913	chr3	50797502	51437562	1.10634	1.1874	0.723388	1.0355	0.573592	1.23016	0.927762	1.20189	0.943707	0.865169	1.10045	0.90312	1.18333	1.38924	0.798928	2.0339	0.890379	1.73194	1.21998	0.791913	0.965168	1.07518	1.04055	0.819045	0.85577	0.794333	1.14261	1.37845	0.861235	1.11995	1.25426	1.08705	1.12472	1.08858	0.826087	0.94029	1.29068	0.96552	0.715588	1.39909	0.499763	1.0914	1.39341	1.01424	1.3468	1.30551
914	chr3	51437563	52049225	1.16363	0.823673	1.07658	1.10501	1.13532	1.09762	0.805899	1.07615	1.12075	0.949937	1.34915	0.832282	0.828582	1.16744	1.25402	0.879551	1.09505	0.885201	1.28216	0.86459	0.945772	0.977247	0.915276	1.01498	1.0067	0.911024	0.897475	1.32306	1.1434	1.00904	1.03563	0.997169	1.24527	0.800374	0.959409	1.06605	1.10485	1.22033	1.1409	0.7067	1.27831	0.874689	1.11931	0.913939	0.801761	1.09234
915	chr3	52049226	52572622	1.21084	1.07908	1.59687	1.09666	0.876786	1.0904	0.893049	1.42472	1.25562	1.04452	1.31942	0.618528	0.925275	0.907718	1.41658	1.15306	1.19545	1.32462	1.08999	1.31852	1.09935	1.13352	1.03185	0.928844	0.741403	1.00759	0.944503	1.16825	1.13945	0.86203	1.34068	0.713357	0.94473	1.04547	0.922764	1.48982	1.03579	1.2387	0.949802	0.988342	1.28248	1.11617	1.1573	1.12096	1.28847	0.579178
916	chr3	52572623	53144358	0.957263	1.58422	0.952039	0.696731	0.875089	0.632872	1.21548	1.21031	1.10833	1.15801	1.33375	1.21631	1.36512	1.21469	1.20721	1.70022	0.450608	1.72227	1.17626	1.01647	1.0737	0.94337	0.860208	0.921902	0.874276	1.10685	0.976152	1.21441	1.57348	1.32596	1.10763	0.805617	0.938917	0.741081	0.978235	0.950173	0.912859	0.736627	1.0893	1.00745	1.4672	0.996624	1.05716	1.34267	0.840777	0.79043
917	chr3	53144359	53716970	1.06584	0.846913	0.671578	1.0672	0.659459	0.836465	0.889889	0.926044	0.95312	1.47179	1.24584	0.968405	0.897831	1.22844	1.0113	1.2251	0.754512	1.27245	1.03322	0.768982	1.3506	1.07947	0.925678	1.0295	1.29699	0.880354	1.049	1.01332	0.858539	0.942796	0.981184	1.26407	0.784085	1.04223	0.806807	1.19021	0.858782	0.724474	0.898345	0.782525	1.01791	0.74094	0.942626	0.753693	1.14279	1.22814
918	chr3	53716971	54270764	1.12979	0.915442	0.945189	0.744314	0.844777	1.03174	0.935969	0.856187	0.997084	1.05829	1.28021	1.3326	0.986477	1.25081	1.22997	0.790213	1.39574	1.1502	0.884003	1.10431	0.912311	0.949352	0.821021	0.961808	1.11833	1.39493	1.10877	0.720372	0.824896	1.18974	0.844235	1.142	1.10355	0.575204	1.08288	1.05878	1.11214	1.23353	1.55498	1.25616	0.903062	1.14378	1.0136	0.784668	0.785724	1.09825
919	chr3	54270765	54820051	0.998896	0.879098	0.928722	1.0497	0.927787	1.3481	0.932516	0.961713	1.08349	1.03121	1.18402	1.23761	0.748038	1.14715	1.22547	0.698499	0.690094	0.759298	1.04597	0.611438	0.859447	1.0032	0.956697	1.00547	1.29345	1.16241	0.967019	1.10899	0.900391	1.16272	1.08383	0.841455	0.85064	1.22991	1.16576	0.919169	0.801733	1.03259	1.20897	0.983281	0.79771	1.53285	0.808183	0.971404	0.795486	0.9292
920	chr3	54820052	55351836	1.03878	0.801119	0.850599	1.00535	1.49925	1.0424	0.741281	0.758289	0.968808	1.16112	1.36955	0.837665	1.03875	1.03687	0.933172	1.23584	1.30806	0.575187	0.867221	1.24844	0.729413	1.07406	0.985879	0.71657	0.950471	1.03992	1.26993	0.914214	0.956257	1.30241	0.958499	0.824257	1.12749	1.54642	0.797737	0.823414	0.864499	1.16595	1.08497	1.05298	0.899954	1.1763	1.10688	0.93877	1.0615	0.854924
921	chr3	55351837	55877584	0.78335	1.00052	0.885208	0.923441	0.971007	1.01732	1.23622	1.01692	1.07432	0.728305	1.21496	0.937841	0.762821	1.28516	1.00829	1.42234	1.26639	0.648822	0.93342	1.39907	1.11877	0.793356	1.0145	0.876032	1.15951	1.23743	1.23489	1.02714	0.963796	0.983307	0.64202	1.32346	1.39036	1.07501	0.998661	0.8063	0.841248	1.11963	1.17422	1.09365	0.769634	1.13743	0.866578	1.20551	0.936873	1.30402
922	chr3	55877585	56430114	1.34641	1.21339	1.03551	0.862399	0.989804	1.16133	0.878153	1.09881	0.972926	1.15019	0.545629	0.767701	1.19703	0.911838	1.05877	1.29196	1.14874	0.700816	1.11674	1.08326	1.1656	0.96277	0.952658	1.23857	1.38485	0.949587	1.00749	1.43103	1.04962	0.959708	1.04353	0.881753	1.41983	0.819295	1.33142	1.11579	0.876835	0.948484	0.946896	0.863605	0.919538	0.862442	1.03063	0.97314	1.06257	1.49007
923	chr3	56430115	57014024	0.933048	0.858361	0.982399	1.32098	1.14073	0.956867	1.24434	0.969042	1.03087	0.951133	1.25245	1.05541	1.27494	0.91253	1.00141	1.48449	1.09853	0.726452	1.05772	1.03089	0.959995	0.96515	0.88953	1.15687	1.15987	0.978261	0.788749	1.40172	1.47553	1.41368	0.949732	0.6866	0.897393	1.26886	1.08518	0.816388	0.927629	0.862987	0.828455	1.1975	0.749955	0.970559	1.03587	1.36004	1.28256	1.4629
924	chr3	57014025	57616689	0.694611	1.19375	1.06252	0.987987	1.19283	1.16693	0.895454	1.02485	1.03179	1.22655	1.03142	0.933258	0.779504	1.06732	1.18451	1.13025	1.01071	0.603421	1.05936	0.616698	1.03151	1.03272	1.19797	0.950728	1.05117	0.958208	1.17389	1.49879	1.16815	1.45742	0.971032	0.938681	0.882714	0.786653	1.51863	0.671646	0.756264	0.921623	0.935074	1.60811	0.751146	0.802264	0.680614	0.773014	1.09457	1.34091
925	chr3	57616690	58159775	0.859577	1.28422	0.722414	1.12141	0.957458	0.777074	0.841894	1.01327	1.04398	1.46293	0.675613	1.13003	0.974218	0.809602	1.00641	0.975211	1.04083	0.620855	1.09769	0.878344	0.998349	1.01871	0.848658	1.03655	0.840211	0.997504	0.86608	0.665129	1.32002	1.24747	1.14381	1.24206	1.28786	0.946308	1.18449	0.781353	1.26871	1.06658	1.0104	0.992727	1.00641	0.734125	1.28652	0.814589	0.665807	0.99103
926	chr3	58159776	58690519	0.738059	0.716229	1.29577	1.28965	1.42585	1.02917	0.764936	0.954667	1.1481	0.938718	0.949359	1.19888	0.930854	1.28807	0.59296	1.00834	0.93683	0.9567	0.954674	1.08893	1.10737	0.939075	0.900171	1.00169	0.998463	0.812508	0.865738	0.867897	1.24543	0.877946	1.23523	1.09386	1.10004	1.09058	1.04805	0.993123	1.03616	1.07673	1.2315	1.24144	1.24114	1.4702	0.731915	1.24977	1.32703	0.827095
927	chr3	58690520	59274973	0.955833	0.762015	1.34795	1.08791	0.840423	1.06025	0.765453	0.929357	0.93525	1.22065	1.40998	0.935112	1.09186	0.818786	1.14152	0.39512	1.39621	1.10263	0.938098	1.30265	0.776927	0.868282	1.06739	1.22959	0.875157	1.07015	0.885412	1.07616	0.883651	0.938794	0.724209	1.08428	0.722768	1.02298	1.7052	0.593801	1.08866	1.06712	1.10483	1.18702	1.23811	0.797689	0.840538	1.09201	1.59868	0.61545
928	chr3	59274974	59809329	0.859804	0.804306	0.713334	1.22383	1.31013	0.67672	1.10121	0.940771	1.0802	1.18467	1.05888	0.77149	0.711431	1.09546	0.961202	0.989515	1.08242	0.962001	0.803038	1.15129	0.881941	1.17058	1.17301	0.925449	0.895115	0.996824	0.969246	1.04328	0.95861	0.753642	1.37832	1.29671	0.878636	1.23091	0.744658	0.59461	1.16713	1.26889	0.840244	1.3514	1.02918	1.08736	0.962546	1.07238	1.01511	0.64599
929	chr3	59809330	60335054	1.51876	1.03855	1.2035	0.921849	1.05149	0.900268	0.917735	1.16607	0.859941	0.777478	1.02505	1.15132	1.1649	1.35004	1.07108	1.28459	1.07161	0.926393	1.37616	1.49655	1.09575	0.780754	0.964463	1.07636	1.18177	1.10944	1.09261	1.15608	1.01668	1.32307	1.3371	1.21579	0.852751	0.799635	0.960774	0.520336	0.900273	0.961068	0.801854	1.14118	1.46624	0.969973	1.27376	1.02108	0.904422	0.957138
930	chr3	60335055	60902697	1.06387	0.880603	0.867457	1.40368	0.884185	0.817054	0.990575	1.10274	0.978459	1.20008	1.07622	0.686316	0.788812	0.741685	1.05584	1.06438	0.820903	0.787919	0.810834	1.40818	0.966366	0.969207	1.27078	1.17696	1.01761	1.0784	1.11099	1.30531	1.60274	1.57499	1.10862	1.09157	0.948371	1.26523	0.917486	1.2268	0.938472	0.897854	0.977063	0.89305	1.01853	0.859008	1.43301	0.942361	0.706474	0.930512
931	chr3	60902698	61498295	0.818822	1.36182	1.02179	1.46583	1.08961	0.842753	1.12255	1.085	0.991913	0.856879	0.732511	1.18425	0.844138	1.1607	1.14533	1.30305	0.980809	0.777971	1.06473	0.903271	0.933518	1.06435	0.985741	1.03321	1.20364	0.844957	1.07733	1.1639	1.16952	0.718328	1.15932	0.999538	1.04263	1.30204	0.845071	0.919518	0.977438	1.13953	0.853078	1.126	1.26716	1.18819	1.03962	1.20306	0.934692	1.12056
932	chr3	61498296	62070998	1.15999	1.0553	0.464014	0.860013	1.37749	1.02777	1.05309	1.25702	0.983548	0.876574	0.976174	0.983414	1.22857	0.870241	0.920061	1.65773	0.682118	0.818843	1.11739	1.05892	0.871005	1.04749	0.98122	1.42172	1.18126	0.959911	0.925418	1.04881	1.11914	0.853828	0.873948	0.91519	1.02319	1.34843	1.02152	0.969718	0.858266	1.19645	1.09495	1.17641	1.26996	1.06204	1.06504	0.900286	1.65343	1.20128
933	chr3	62070999	62602561	1.20231	1.00116	1.17223	1.08255	1.01606	1.30405	0.811384	0.822588	0.904817	1.07184	0.746116	1.09725	1.00022	1.19325	0.847021	0.972814	0.913359	0.890866	0.987042	1.02551	0.984861	0.95232	1.16674	1.08993	1.42169	1.0371	0.927308	1.0141	1.30271	0.964395	0.651872	1.27819	1.28393	1.46917	1.32042	0.781095	0.644764	1.14356	1.20848	1.03946	0.771221	1.00877	0.994321	0.942626	1.22167	1.14897
934	chr3	62602562	63142392	0.979169	1.32986	0.893023	1.01383	1.17488	0.790166	1.13752	1.13077	0.999295	0.873665	0.832503	0.913217	1.0547	1.0854	1.31407	1.23051	1.04229	0.876527	1.2939	1.26289	1.01354	0.956466	0.899929	1.32953	0.691688	0.8194	1.05712	1.2989	1.06105	1.00575	1.50181	1.18615	1.1975	0.633722	1.06845	0.788012	0.982105	1.00453	0.941635	1.04118	0.887253	1.07441	1.03122	0.868022	1.08127	1.07192
935	chr3	63142393	63711946	1.08907	1.00655	0.924362	0.825293	0.635762	0.682447	0.823075	0.931821	0.889409	1.2242	0.757056	0.988113	1.00223	0.925055	1.09873	1.30941	1.1881	0.822792	1.21114	0.963249	0.995001	1.07822	0.851697	1.13815	1.2515	0.886751	0.907964	1.05284	1.22683	1.10022	1.12686	1.48758	1.30774	0.694838	1.21091	0.646371	0.891412	0.964875	1.12072	0.885258	0.794357	1.05087	0.909889	1.14509	1.47972	0.944255
936	chr3	63711947	64225502	1.33417	1.53943	1.72745	1.48699	1.23316	0.683625	1.08184	0.915897	1.14205	1.29605	0.94989	1.05102	1.26142	1.10135	0.90203	1.02683	1.06869	0.795448	0.936339	0.810005	1.11799	1.14879	0.868038	1.0855	1.02831	0.907328	0.712186	0.956305	1.03858	0.66801	1.07573	1.30804	0.766757	1.37834	1.22915	0.629058	1.0189	0.83681	1.00234	1.17559	1.36244	1.11967	1.47999	0.773455	1.03572	1.2006
937	chr3	64225503	64744874	1.47086	1.14917	1.18204	0.960274	0.754528	0.706637	0.864151	0.779326	0.884909	1.22974	1.01182	0.866265	0.805088	1.12133	0.968766	1.24073	0.920434	1.09708	1.08454	1.15156	0.818568	0.986366	1.00845	1.24369	1.14338	0.794174	0.73219	0.909714	0.74242	0.975988	1.16652	0.891258	0.846812	1.7275	0.938485	0.698104	1.0859	1.26591	1.36253	1.47102	1.59923	1.0333	1.17391	1.32454	1.31427	0.884047
938	chr3	64744875	65283641	1.2958	0.997996	0.868582	1.43342	0.961171	0.86466	0.960219	1.11984	0.938757	0.966041	1.04785	1.10923	0.957706	0.963166	1.05718	1.37865	0.667973	1.14786	1.28891	0.659943	1.27921	1.05467	0.851702	1.2307	1.15315	0.938404	0.66163	1.07394	1.25158	0.824769	0.938276	0.9408	1.31251	1.15813	0.973151	0.779876	0.8498	1.0443	1.15198	0.859849	1.00925	0.885021	1.00898	1.31402	1.12596	1.00951
939	chr3	65283642	65824786	0.984331	0.931381	0.789558	1.06475	1.39825	0.751011	0.944388	0.985711	0.775729	1.03223	1.21436	0.873917	1.06064	1.00167	0.922048	1.33042	1.10833	1.06566	0.909812	1.39049	1.56446	0.979339	0.906111	0.668424	1.22562	0.973239	0.861817	0.829826	1.29088	0.957062	1.01479	1.20952	1.18418	1.0299	1.0318	0.748725	0.968115	1.06956	1.36742	1.40082	0.866918	0.872453	1.11101	1.07994	1.09998	0.748966
940	chr3	65824787	66444432	0.818253	1.15528	1.33308	1.16714	0.860173	0.785795	0.873073	1.20408	0.897849	0.975489	1.10544	0.738433	1.24145	1.22184	0.687138	1.41337	0.760178	0.965197	1.08673	0.540046	1.20028	1.13443	0.977707	0.990215	0.853984	0.820445	0.959048	0.898939	1.0957	1.25377	0.88274	1.28404	0.806363	0.833262	0.90812	0.370908	0.955886	0.86499	1.19679	1.42383	0.753273	1.06703	0.852387	1.0906	0.886356	0.819207
941	chr3	66444433	67003910	0.775126	1.13645	0.921603	1.19855	0.897504	0.859866	0.988377	0.896478	1.04677	1.66112	1.50609	0.966159	0.984322	1.41288	0.519396	1.23125	1.3114	0.929028	1.1908	0.777034	1.17705	0.879878	1.04491	0.921281	1.30078	1.01769	1.16055	1.03311	0.960144	1.18913	0.914718	0.862114	1.33372	0.794871	1.09518	0.922991	0.964305	1.17232	1.01474	1.21659	0.939043	0.886437	1.12624	1.27433	0.748334	0.904541
942	chr3	67003911	67588864	1.02872	1.17053	0.735883	0.940335	0.476701	0.627646	1.1525	1.02716	0.840788	0.749435	0.919964	0.99277	0.831464	1.2848	0.941094	1.05864	0.62013	1.06721	0.791557	1.05421	0.685134	1.0079	0.937921	1.22999	1.42732	0.892229	0.954794	1.44944	1.26733	0.789415	1.01393	1.13731	0.986814	1.00661	1.41167	0.764701	0.719175	1.23295	1.06552	0.88222	0.883151	0.863872	1.14558	1.08928	1.13305	1.18054
943	chr3	67588865	68186644	1.27284	1.24579	1.0948	1.16803	1.13813	0.88889	1.2167	1.02353	1.09399	1.32735	0.959239	0.969552	1.07877	1.8278	0.880793	1.2978	0.714901	1.12107	0.980863	1.15512	1.20245	1.14273	1.08168	1.1673	0.846066	0.910782	1.11288	0.894027	0.956427	1.11645	0.828809	1.07984	1.44652	1.0512	1.27283	1.14846	0.738404	0.800296	1.06921	0.915249	1.29355	1.2295	0.884802	1.09489	1.10957	1.09252
944	chr3	68186645	68797815	1.05113	1.22004	0.682094	1.2499	1.43723	0.980617	1.08374	1.09666	0.911905	1.16727	1.0755	0.985397	1.1953	1.29627	1.14435	1.294	1.22101	1.16456	1.10214	0.992392	0.747581	0.906599	1.33341	1.00745	1.18368	0.934544	0.842497	1.00432	1.19938	0.795565	1.16517	1.07017	1.02388	1.07474	0.75244	1.33551	1.01942	1.19726	1.44373	1.03501	1.41967	1.49744	1.16938	1.22217	1.20116	0.912504
945	chr3	68797816	69376664	0.812278	1.08527	0.759578	0.813321	1.49293	1.03388	1.15904	1.10931	0.806573	1.65691	0.887719	1.05966	1.03772	1.50624	1.09443	1.17287	1.04352	0.885831	1.04291	1.00836	0.972281	1.03895	0.868215	1.2069	0.880128	1.11217	1.05874	1.18109	0.781154	1.16505	1.2777	1.04161	0.895425	1.46088	1.19312	0.964148	0.92938	0.944708	1.11972	0.962277	0.774424	0.813959	1.80694	0.968312	1.68881	1.13456
946	chr3	69376665	69941299	1.12316	1.18608	1.13678	1.16755	1.36946	0.894996	1.05281	1.14818	1.06292	0.83869	0.793035	1.2602	0.86869	1.2008	0.939044	1.29471	1.13079	1.06259	0.909415	0.995705	1.03379	0.904396	0.831453	1.08477	0.700352	1.05133	1.02667	1.42186	0.936224	1.11571	1.12653	1.05395	0.789417	0.882965	1.38217	1.22334	0.804768	0.990162	0.910374	0.742883	0.866562	1.46001	1.34954	1.07998	1.16322	1.0215
947	chr3	69941300	70523065	1.13095	0.974598	1.26583	1.23777	0.959609	1.3099	0.794471	0.840041	0.951272	1.09497	0.770503	1.02048	0.948179	1.19533	0.914781	1.37735	1.20847	1.17926	0.970649	0.854046	0.944954	0.993836	1.0684	1.0447	1.19841	0.852299	0.863983	0.940632	1.08757	1.00486	0.88539	0.96338	0.883538	1.12877	1.04695	1.01555	0.868461	1.07831	0.917963	1.65261	0.765995	0.734201	1.09819	0.791669	0.951974	1.2969
948	chr3	70523066	71081020	1.23182	1.08575	1.16031	0.547549	0.832314	0.904764	0.666798	0.955701	0.931394	1.31319	1.09085	1.17573	1.14221	1.34821	1.37066	1.49427	0.633206	1.21798	1.01278	1.0372	1.24076	0.921341	1.12469	1.05322	0.958371	1.13228	0.858323	1.18888	0.815039	0.658676	1.32954	0.992635	1.08211	0.611414	1.01997	0.778907	1.12771	0.975609	0.893742	0.803305	1.17098	1.04128	1.08764	1.0326	0.930472	1.17611
949	chr3	71081021	71607116	1.2165	1.22876	1.14733	0.635599	0.975237	0.684784	1.16997	1.018	0.923538	1.16013	0.921316	0.803554	1.06868	1.16759	0.967554	1.29067	1.04426	0.916527	1.16697	1.19306	0.754	1.04826	0.721895	0.812618	0.955121	1.14448	0.982557	0.630848	0.988114	1.17933	0.855397	1.36076	1.08013	0.859051	1.235	0.714829	1.07277	0.782059	0.980704	0.844804	1.09971	1.04656	1.35494	1.00093	0.695688	1.09144
950	chr3	71607117	72146169	1.26773	1.06898	0.471349	0.857952	0.96256	0.889027	1.07684	1.01742	0.977336	0.809787	1.10421	1.36415	1.37894	1.17586	1.04551	0.864411	0.839662	0.928686	1.07513	0.8312	1.03333	0.897216	0.89181	0.799185	1.0217	0.651025	1.11283	0.89776	1.08937	1.08025	1.19707	0.938074	0.927545	0.97267	1.2774	0.893082	1.30344	0.97797	1.01402	0.903366	1.00489	1.0366	0.734961	1.11636	0.988685	0.829233
951	chr3	72146170	72665035	0.962687	1.04545	0.98246	1.17125	0.57497	0.882677	0.987353	0.984971	1.00946	1.29371	1.31571	1.06354	1.26679	1.18151	0.897498	1.03285	1.02738	1.03355	1.1376	0.953057	0.897556	0.867817	0.906419	1.23746	1.09099	0.865783	1.01726	0.860682	1.00543	1.1169	1.20883	0.794139	0.790897	1.19522	0.739434	0.975352	0.959629	1.1067	0.91428	1.37341	1.38769	0.844346	1.2113	0.939474	0.672079	0.662568
952	chr3	72665036	73240617	0.840568	1.00167	0.82281	1.01859	0.801117	0.873001	0.966762	0.919586	0.978159	1.17222	0.879085	1.242	1.25776	1.00672	1.06144	0.927918	0.672269	0.854044	0.931694	0.978136	1.17861	1.02449	1.00793	1.16989	1.1034	0.919557	1.15621	0.950729	0.890023	1.24753	1.36067	1.05486	0.966549	0.800378	0.772606	0.675695	0.825038	0.800133	0.725338	1.43484	0.714864	1.27876	1.01463	0.715274	0.961272	0.838454
953	chr3	73240618	73789580	0.932859	1.07827	1.11308	1.10636	1.21923	1.45308	1.00936	1.08441	0.997133	0.697303	1.10298	1.20224	1.16847	1.07605	1.31731	1.07658	1.44414	1.05067	1.06991	1.05713	0.9488	1.06774	1.20501	1.45729	1.2913	1.45842	1.10713	1.38723	1.21896	1.06061	1.0513	0.968823	1.40589	1.24663	0.715011	1.08514	0.996944	1.13104	1.21168	1.52099	0.779229	0.987865	0.768077	1.05192	1.425	1.38836
954	chr3	73789581	74350060	0.989387	1.30524	1.09383	1.09541	1.16943	1.04745	0.922038	1.1271	0.899149	1.1014	0.990754	1.2326	0.953934	1.25653	1.09235	1.34018	0.800908	0.921424	1.35959	1.05357	0.861867	1.10686	0.976717	1.30976	0.905378	0.889546	0.999578	0.972844	1.05548	0.756081	1.20179	1.45514	0.985312	1.67195	1.0953	0.807267	1.06073	1.12503	0.964854	1.09932	1.03203	1.0019	1.21525	0.884125	0.956174	1.27539
955	chr3	74350061	74905994	1.17362	1.42902	0.971765	1.01143	1.30635	1.00958	0.886515	0.831913	1.0002	0.9629	1.13654	0.826461	1.06149	1.26005	1.28858	1.48977	1.34225	0.613617	1.09355	1.02233	1.17396	0.98414	0.963162	1.54442	1.06514	0.948867	1.04776	1.34244	0.900294	0.742354	0.809114	1.32671	1.04593	1.30694	1.07508	0.932611	1.12059	1.26102	1.23539	1.52827	0.817295	1.0023	0.884606	1.09422	1.01382	0.66786
956	chr3	74905995	75508939	1.03011	1.10707	1.14671	0.968465	1.32866	0.992547	0.639905	1.06034	0.866093	0.884933	1.26177	0.905789	1.08365	0.954791	1.06823	1.38257	0.975993	0.762791	0.996114	1.05864	0.729626	0.90406	0.67978	1.10752	0.807767	0.780693	1.03548	0.765945	1.10023	1.1109	0.949156	1.06621	0.977629	1.12085	0.868321	0.769337	0.637953	1.36967	0.848641	0.917626	1.01464	1.2134	1.13431	0.747513	0.993972	0.729816
[truncated: 4,044 more rows]
[truncated: 35 more columns]
