# Supplementary material for: Copolymerization of single-cell nucleic acids into balls of acrylamide gel
Source: Genome Res. 2020 Jan;30(1):49–61. doi: 10.1101/gr.253047.119 (PMC6961581; doi:10.1101/gr.253047.119)
Supplement: Supplemental Material [file supp_gr.253047.119_Supplemental_Data_S4.xlsx]

## Sheet: README
Supplemental Data S4 - Segmented normalized bin count data for DNA BAGs from sample nyu005_8
Column name	Description
bin.number	sequence number of bin in genome order
chrom	chromosome location of the bin
bin.start	chromosome position bin start coordinate in hg19
bin.end	chromosome position bin end coordinate in hg19
11-character string consisting of ACGT indicating the BAG barcode	the segmented normalized bin count value

## Sheet: nyu005_8.5k.bins.seg
bin.number	chrom	bin.start	bin.end	AAAGGGTCATC	AACCTCTGAAC	AACTTGCTAGA	AACTTGGGTCA	AAGATGGTTGA	AAGCATATACG	AAGCATTCTTA	AAGGTTGAAGA	AAGGTTTTACC	AAGTCAACACA	AAGTCAAGATC	AATGTCGGTTG	AATTAGAGACT	AATTAGTCTAC	AATTAGTTATT	AGAGTCGATGT	AGAGTCGGTAT	AGAGTCTCACT	AGCAACTTATT	AGCAGTATATA	AGTATTGTAAT	AGTATTTGAAC	AGTATTTGAGT	AGTTCGTGATA	ATATAGTGTGG	ATGACATATAG	ATGAGGAATAT	ATGAGGTGATA	ATGTGAAATTG	ATGTGACGTGA	ATTAGTTATCT	ATTCAGAATTG	ATTCAGTGTCC	ATTGACAATTG	ATTGACACAAT	ATTGACAGATC	CAACTTTCTCG	CAGAAGAGTCG	CAGAAGGTTGA	CAGTAAAGTGT	CAGTAACGTGA	CAGTAAGCAGT	CAGTAAGCTAA	CAGTAATGATA	CATAATCAACG	CATAATCGACA
1	chr1	1	452222	0.963773	0.851888	1.00511	0.992528	1.01643	0.997802	0.85257	0.970251	1.00844	1.02071	1.02737	1.00713	1.0286	0.984226	0.972777	1.09713	0.984718	0.965509	1.05075	0.970543	0.940635	0.970057	1.23392	1.04676	0.98334	1.02357	0.940353	0.986295	0.91092	1.02788	0.996805	0.992627	0.995212	0.941011	0.955424	1.04645	0.981081	0.976872	0.986393	0.973653	0.976774	1.00562	1.0203	1.01471	1.00411	0.998002
2	chr1	452223	745221	0.963773	0.851888	1.00511	0.992528	1.01643	0.997802	0.85257	0.970251	1.00844	1.02071	1.02737	1.00713	1.0286	0.984226	0.972777	1.09713	0.984718	0.965509	1.05075	0.970543	0.940635	0.970057	1.23392	1.04676	0.98334	1.02357	0.940353	0.986295	0.91092	1.02788	0.996805	0.992627	0.995212	0.941011	0.955424	1.04645	0.981081	0.976872	0.986393	0.973653	0.976774	1.00562	1.0203	1.01471	1.00411	0.998002
3	chr1	745222	1492396	0.963773	0.851888	1.00511	0.992528	1.01643	0.997802	0.85257	0.970251	1.00844	1.02071	1.02737	1.00713	1.0286	0.984226	0.972777	1.09713	0.984718	0.965509	1.05075	0.970543	0.940635	0.970057	1.23392	1.04676	0.98334	1.02357	0.940353	0.986295	0.91092	1.02788	0.996805	0.992627	0.995212	0.941011	0.955424	1.04645	0.981081	0.976872	0.986393	0.973653	0.976774	1.00562	1.0203	1.01471	1.00411	0.998002
4	chr1	1492397	2103671	0.963773	0.851888	1.00511	0.992528	1.01643	0.997802	0.85257	0.970251	1.00844	1.02071	1.02737	1.00713	1.0286	0.984226	0.972777	1.09713	0.984718	0.965509	1.05075	0.970543	0.940635	0.970057	1.23392	1.04676	0.98334	1.02357	0.940353	0.986295	0.91092	1.02788	0.996805	0.992627	0.995212	0.941011	0.955424	1.04645	0.981081	0.976872	0.986393	0.973653	0.976774	1.00562	1.0203	1.01471	1.00411	0.998002
5	chr1	2103672	2787808	0.963773	0.851888	1.00511	0.992528	1.01643	0.997802	0.85257	0.970251	1.00844	1.02071	1.02737	1.00713	1.0286	0.984226	0.972777	1.09713	0.984718	0.965509	1.05075	0.970543	0.940635	0.970057	1.23392	1.04676	0.98334	1.02357	0.940353	0.986295	0.91092	1.02788	0.996805	0.992627	0.995212	0.941011	0.955424	1.04645	0.981081	0.976872	0.986393	0.973653	0.976774	1.00562	1.0203	1.01471	1.00411	0.998002
6	chr1	2787809	3339607	0.963773	1.04144	1.00511	0.992528	1.01643	0.997802	1.40607	0.970251	1.00844	1.02071	1.02737	1.00713	1.0286	0.984226	0.972777	1.09713	0.984718	0.965509	1.05075	0.970543	0.940635	0.970057	1.23392	1.04676	0.98334	1.02357	0.940353	0.986295	0.91092	1.02788	0.996805	0.992627	0.995212	0.941011	0.955424	1.04645	0.981081	0.976872	0.986393	0.973653	0.976774	1.00562	1.0203	1.01471	1.00411	0.998002
7	chr1	3339608	4076332	0.963773	1.04144	1.00511	0.992528	1.01643	0.997802	1.40607	0.970251	1.00844	1.02071	1.02737	1.00713	1.0286	0.984226	0.972777	1.09713	0.984718	0.965509	1.05075	0.970543	0.940635	0.970057	1.23392	1.04676	0.98334	1.02357	0.940353	0.986295	0.91092	1.02788	0.996805	0.992627	0.995212	0.941011	0.955424	1.04645	0.981081	0.976872	0.986393	0.973653	0.976774	1.00562	1.0203	1.01471	1.00411	0.998002
8	chr1	4076333	4666304	0.963773	1.04144	1.00511	0.992528	1.01643	0.997802	1.40607	0.970251	1.00844	1.02071	1.02737	1.00713	1.0286	0.984226	0.972777	1.09713	0.984718	0.965509	1.05075	0.970543	0.940635	0.970057	1.23392	1.04676	0.98334	1.02357	0.940353	0.986295	0.91092	1.02788	0.996805	0.992627	0.995212	0.941011	0.955424	1.04645	0.981081	0.976872	0.986393	0.973653	0.976774	1.00562	1.0203	1.01471	1.00411	0.998002
9	chr1	4666305	5263403	0.963773	1.04144	1.00511	0.992528	1.01643	0.997802	1.40607	0.970251	1.00844	1.02071	1.02737	1.00713	1.0286	0.984226	0.972777	1.09713	0.984718	0.965509	1.05075	0.970543	0.940635	0.970057	1.23392	1.04676	0.98334	1.02357	0.940353	0.986295	0.91092	1.02788	0.996805	0.992627	0.995212	0.941011	0.955424	1.04645	0.981081	0.976872	0.986393	0.973653	0.976774	1.00562	1.0203	1.01471	1.00411	0.998002
10	chr1	5263404	5841897	0.963773	1.04144	1.00511	0.992528	1.01643	0.997802	0.978436	0.970251	1.00844	1.02071	1.02737	1.00713	1.0286	0.984226	0.972777	1.09713	0.984718	0.965509	1.05075	0.970543	0.940635	0.970057	1.23392	1.04676	0.98334	1.02357	0.940353	0.986295	0.91092	1.02788	0.996805	0.992627	0.995212	0.941011	0.955424	1.04645	0.981081	0.976872	0.986393	0.973653	0.976774	1.00562	1.0203	1.01471	1.00411	0.998002
11	chr1	5841898	6411067	0.963773	1.04144	1.00511	0.992528	1.01643	0.997802	0.978436	0.970251	1.00844	1.02071	1.02737	1.00713	1.0286	0.984226	0.972777	1.09713	0.984718	0.965509	1.05075	0.970543	0.940635	0.970057	1.23392	1.04676	0.98334	1.02357	0.940353	0.986295	0.91092	1.02788	0.996805	0.992627	0.995212	0.941011	0.955424	1.04645	0.981081	0.976872	0.986393	0.973653	0.976774	1.00562	1.0203	1.01471	1.00411	0.998002
12	chr1	6411068	7030623	0.963773	1.04144	1.00511	0.992528	1.01643	0.997802	0.978436	0.970251	1.00844	1.02071	1.02737	1.00713	1.0286	0.984226	0.972777	1.09713	0.984718	0.449554	1.05075	0.970543	0.940635	0.970057	1.23392	1.04676	0.98334	1.02357	0.940353	0.986295	0.91092	1.02788	0.996805	0.992627	0.995212	0.941011	0.955424	1.04645	0.981081	0.976872	0.986393	0.973653	0.976774	1.00562	1.0203	1.01471	1.00411	0.998002
13	chr1	7030624	7535701	0.963773	1.04144	1.00511	0.992528	1.01643	0.997802	0.978436	0.970251	1.00844	1.02071	1.02737	1.00713	1.0286	0.984226	0.972777	1.09713	0.984718	0.449554	1.05075	0.970543	0.940635	0.970057	0.984816	1.04676	0.98334	1.02357	0.940353	0.986295	0.91092	1.02788	0.996805	0.992627	0.995212	0.941011	0.955424	1.04645	0.981081	0.976872	0.986393	0.973653	0.976774	1.00562	1.0203	1.01471	1.00411	0.998002
14	chr1	7535702	8098868	0.963773	1.04144	1.00511	0.992528	1.01643	0.997802	0.978436	0.970251	1.00844	1.02071	1.02737	1.00713	1.0286	0.984226	0.972777	1.09713	0.984718	0.449554	1.05075	0.970543	0.940635	0.970057	0.984816	1.04676	0.98334	1.02357	0.940353	0.986295	0.91092	1.02788	0.996805	0.992627	0.995212	0.941011	0.955424	1.04645	0.981081	0.976872	0.986393	0.973653	0.976774	1.00562	1.0203	1.01471	1.00411	0.998002
15	chr1	8098869	8658301	0.963773	1.04144	1.00511	0.992528	1.01643	0.997802	0.978436	0.970251	1.00844	1.02071	1.02737	1.00713	1.0286	0.984226	0.972777	1.09713	0.984718	0.449554	1.05075	0.970543	0.940635	0.970057	0.984816	1.04676	0.98334	1.02357	0.940353	0.986295	0.91092	1.02788	0.996805	0.992627	0.995212	0.941011	0.955424	1.04645	0.981081	0.976872	0.986393	0.973653	0.976774	1.00562	1.0203	1.01471	1.00411	0.998002
16	chr1	8658302	9247052	0.963773	1.04144	1.00511	0.992528	1.01643	0.997802	0.978436	0.970251	1.00844	1.02071	1.02737	1.00713	1.0286	0.984226	0.972777	1.09713	0.984718	0.449554	1.05075	0.970543	0.940635	0.970057	0.984816	1.04676	0.98334	1.02357	0.940353	0.986295	0.91092	1.02788	0.996805	0.992627	0.995212	0.941011	0.955424	1.04645	0.981081	0.976872	0.986393	0.973653	0.976774	1.00562	1.0203	1.01471	1.00411	0.998002
17	chr1	9247053	9827738	0.963773	1.04144	1.00511	0.992528	1.01643	0.997802	0.978436	0.970251	1.00844	1.02071	1.02737	1.00713	1.0286	0.984226	0.972777	1.09713	0.984718	0.449554	1.05075	0.970543	0.940635	0.970057	0.984816	1.04676	0.98334	1.02357	0.940353	0.986295	0.91092	1.02788	0.996805	0.992627	0.995212	0.941011	0.955424	1.04645	0.981081	0.976872	0.986393	0.973653	0.976774	1.00562	1.0203	1.01471	1.00411	0.998002
18	chr1	9827739	10401768	0.963773	1.04144	1.00511	0.992528	1.01643	0.997802	0.978436	0.970251	1.00844	1.02071	1.02737	1.00713	1.0286	0.984226	0.972777	1.09713	0.984718	0.449554	1.05075	0.970543	0.940635	0.970057	0.984816	1.04676	0.98334	1.02357	0.940353	0.986295	0.91092	1.02788	0.996805	0.992627	0.995212	0.941011	0.955424	1.04645	0.981081	0.976872	0.986393	0.973653	0.976774	1.00562	1.0203	1.01471	1.00411	0.998002
19	chr1	10401769	10963706	0.963773	1.04144	1.00511	0.992528	1.01643	0.997802	0.978436	0.970251	1.00844	1.02071	1.02737	1.00713	1.0286	0.984226	0.972777	1.09713	0.984718	0.449554	1.05075	0.970543	0.940635	0.970057	0.984816	1.04676	0.98334	1.02357	0.940353	0.986295	0.91092	1.02788	0.996805	0.992627	0.995212	0.941011	0.955424	1.04645	0.981081	0.976872	0.986393	0.973653	0.976774	1.00562	1.0203	1.01471	1.00411	0.998002
20	chr1	10963707	11549274	0.963773	1.04144	1.00511	0.992528	1.01643	0.997802	0.978436	0.970251	1.00844	1.02071	1.02737	1.00713	1.0286	0.984226	0.972777	1.09713	0.984718	0.449554	1.05075	0.970543	0.940635	0.970057	0.984816	1.04676	0.98334	1.02357	0.940353	0.986295	0.91092	1.02788	0.996805	0.992627	0.995212	0.941011	0.955424	1.04645	0.981081	0.976872	0.986393	0.973653	0.976774	1.00562	1.0203	1.01471	1.00411	0.998002
21	chr1	11549275	12115795	0.963773	1.04144	1.00511	0.992528	1.01643	0.997802	0.978436	0.970251	1.00844	1.02071	1.02737	1.00713	1.0286	0.984226	0.972777	1.09713	0.984718	0.449554	1.05075	0.970543	0.940635	0.970057	0.984816	1.04676	0.98334	1.02357	0.940353	0.986295	0.91092	1.02788	0.996805	0.992627	0.995212	0.941011	0.955424	1.04645	0.981081	0.976872	0.986393	0.973653	0.976774	1.00562	1.0203	1.01471	1.00411	0.998002
22	chr1	12115796	12639080	0.963773	1.04144	1.00511	0.992528	1.01643	0.997802	0.978436	0.970251	1.00844	1.02071	1.02737	1.00713	1.0286	0.984226	0.972777	1.09713	0.984718	0.449554	1.05075	0.970543	0.940635	0.970057	0.984816	1.04676	0.98334	1.02357	0.940353	0.986295	0.91092	1.02788	0.996805	0.992627	0.995212	0.941011	0.955424	1.04645	0.981081	0.976872	0.986393	0.973653	0.976774	1.00562	1.0203	1.01471	1.00411	0.998002
23	chr1	12639081	13185377	0.963773	1.04144	1.00511	0.992528	1.01643	0.997802	0.978436	0.970251	1.00844	1.02071	1.02737	1.00713	1.0286	0.984226	0.972777	1.09713	0.984718	0.929601	1.05075	0.970543	0.940635	0.970057	0.984816	1.04676	0.98334	1.02357	0.940353	0.986295	0.91092	1.02788	0.996805	0.992627	0.995212	0.941011	0.955424	1.04645	0.981081	0.976872	0.986393	0.973653	0.976774	1.00562	1.0203	1.01471	1.00411	0.998002
24	chr1	13185378	13953813	0.963773	1.04144	1.00511	0.992528	1.01643	0.997802	0.978436	0.970251	1.00844	1.02071	1.02737	1.00713	1.0286	0.984226	0.972777	1.09713	0.984718	0.929601	1.05075	0.970543	0.940635	0.970057	0.984816	1.04676	0.98334	1.02357	0.940353	0.986295	0.91092	1.02788	0.996805	0.992627	0.995212	0.941011	0.955424	1.04645	0.981081	0.976872	0.986393	0.973653	0.976774	1.00562	1.0203	1.01471	1.00411	0.998002
25	chr1	13953814	14525691	0.963773	1.04144	1.00511	0.992528	1.01643	0.997802	0.978436	0.970251	1.00844	1.02071	1.02737	1.00713	1.0286	0.984226	0.972777	1.09713	0.984718	0.929601	1.05075	0.970543	0.940635	0.970057	0.984816	1.04676	0.98334	1.02357	0.940353	0.986295	0.91092	1.02788	0.996805	0.992627	0.995212	0.941011	0.955424	1.04645	0.981081	0.976872	0.986393	0.973653	0.976774	1.00562	1.0203	1.01471	1.00411	0.998002
26	chr1	14525692	15070084	0.963773	1.04144	1.00511	0.992528	1.01643	0.997802	0.978436	0.970251	1.00844	1.02071	1.02737	1.00713	1.0286	0.984226	0.972777	1.09713	0.984718	0.929601	1.05075	0.970543	0.940635	0.970057	0.984816	1.04676	0.98334	1.02357	0.940353	0.986295	0.91092	1.02788	0.996805	0.992627	0.995212	0.941011	0.955424	1.04645	0.981081	0.976872	0.986393	0.973653	0.976774	1.00562	1.0203	1.01471	1.00411	0.998002
27	chr1	15070085	15637822	0.963773	1.04144	1.00511	0.992528	1.01643	0.997802	0.978436	0.970251	1.00844	1.02071	1.02737	1.00713	1.0286	0.984226	0.972777	1.09713	0.984718	0.929601	1.05075	0.970543	0.940635	0.970057	0.984816	1.04676	0.98334	1.02357	0.940353	0.986295	0.91092	1.02788	0.996805	0.992627	0.995212	0.941011	0.955424	1.04645	0.981081	0.976872	0.986393	0.973653	0.976774	1.00562	1.0203	1.01471	1.00411	0.998002
28	chr1	15637823	16224070	0.963773	1.04144	1.00511	0.992528	1.01643	0.997802	0.978436	0.970251	1.00844	1.02071	1.02737	1.00713	1.0286	0.984226	0.972777	1.09713	0.984718	0.929601	1.05075	0.970543	0.940635	0.970057	0.984816	1.04676	0.98334	1.02357	0.940353	0.986295	0.91092	1.02788	0.996805	0.992627	0.995212	0.941011	0.955424	1.04645	0.981081	0.976872	0.986393	0.973653	0.976774	1.00562	1.0203	1.01471	1.00411	0.998002
29	chr1	16224071	16787901	0.963773	1.04144	1.00511	0.992528	1.01643	0.997802	0.978436	0.970251	1.00844	1.02071	1.02737	1.00713	1.0286	0.984226	0.972777	1.09713	0.984718	0.929601	1.05075	0.970543	0.940635	0.970057	0.984816	1.04676	0.98334	1.02357	0.940353	0.986295	0.91092	1.02788	0.996805	0.992627	0.995212	0.941011	0.955424	1.04645	0.981081	0.976872	0.986393	0.973653	0.976774	1.00562	1.0203	1.01471	1.00411	0.998002
30	chr1	16787902	17045007	0.963773	1.04144	1.00511	0.992528	1.01643	0.997802	0.978436	0.970251	1.00844	1.02071	1.02737	1.00713	1.0286	0.984226	0.972777	1.09713	0.984718	0.929601	1.05075	0.970543	0.940635	0.970057	0.984816	1.04676	0.98334	1.02357	0.940353	0.986295	0.91092	1.02788	0.996805	0.992627	0.995212	0.941011	0.955424	1.04645	0.981081	0.976872	0.986393	0.973653	0.976774	1.00562	1.0203	1.01471	1.00411	0.998002
31	chr1	17045008	17464646	0.963773	1.04144	1.00511	0.992528	1.01643	0.997802	0.978436	0.970251	1.00844	1.02071	1.02737	1.00713	1.0286	0.984226	0.972777	1.09713	0.984718	0.929601	1.05075	0.970543	0.940635	0.970057	0.984816	1.04676	0.98334	1.02357	0.940353	0.986295	0.91092	1.02788	0.996805	0.992627	0.995212	0.941011	0.955424	1.04645	0.981081	0.976872	0.986393	0.973653	0.976774	1.00562	1.0203	1.01471	1.00411	0.998002
32	chr1	17464647	18018387	0.963773	1.04144	1.00511	0.992528	1.01643	0.997802	0.978436	0.970251	1.00844	1.02071	1.02737	1.00713	1.0286	0.984226	0.972777	1.09713	0.984718	0.929601	1.05075	0.970543	0.940635	0.970057	0.984816	1.04676	0.98334	1.02357	0.940353	0.986295	0.91092	1.02788	0.996805	0.992627	0.995212	0.941011	0.955424	1.04645	0.981081	0.976872	0.986393	0.973653	0.976774	1.00562	1.0203	1.01471	1.00411	0.998002
33	chr1	18018388	18544245	0.963773	1.04144	1.00511	0.992528	1.01643	0.997802	0.978436	0.970251	1.00844	1.02071	1.02737	1.00713	1.0286	0.984226	0.972777	1.09713	0.984718	0.929601	1.05075	0.970543	0.940635	0.970057	0.984816	1.04676	0.98334	1.02357	0.940353	0.986295	0.91092	1.02788	0.996805	0.992627	0.995212	0.941011	0.955424	1.04645	0.981081	0.976872	0.986393	0.973653	0.976774	1.00562	1.0203	1.01471	1.00411	0.998002
34	chr1	18544246	19100010	0.963773	1.04144	1.00511	0.992528	1.01643	0.997802	0.978436	0.970251	1.00844	1.02071	1.02737	1.00713	1.0286	0.984226	0.972777	1.09713	0.984718	0.929601	1.05075	0.970543	0.940635	0.970057	1.29849	1.04676	0.98334	1.02357	0.940353	0.986295	0.91092	1.02788	0.996805	0.992627	0.995212	0.941011	0.955424	1.04645	0.981081	0.976872	0.986393	0.973653	0.976774	1.00562	1.0203	1.01471	1.00411	0.998002
35	chr1	19100011	19606896	0.963773	1.04144	1.00511	0.992528	1.01643	0.997802	0.978436	0.970251	1.00844	1.02071	1.02737	1.00713	1.0286	0.984226	0.972777	1.09713	0.984718	0.929601	1.05075	0.970543	0.940635	0.970057	1.29849	1.04676	0.98334	1.02357	0.940353	0.986295	0.91092	1.02788	0.996805	0.992627	0.995212	0.941011	0.955424	1.04645	0.981081	0.976872	0.986393	0.973653	0.976774	1.00562	1.0203	1.01471	1.00411	0.998002
36	chr1	19606897	20137766	0.963773	1.04144	1.00511	0.992528	1.01643	0.997802	0.978436	0.970251	1.00844	1.02071	1.02737	1.00713	1.0286	0.984226	0.972777	1.09713	0.984718	0.929601	1.05075	0.970543	0.940635	0.970057	1.29849	1.04676	0.98334	1.02357	0.940353	0.986295	0.91092	1.02788	0.996805	0.992627	0.995212	0.941011	0.955424	1.04645	0.981081	0.976872	0.986393	0.973653	0.976774	1.00562	1.0203	1.01471	1.00411	0.998002
37	chr1	20137767	20657072	0.963773	1.04144	1.00511	0.992528	1.01643	0.997802	0.978436	0.970251	1.00844	1.02071	1.02737	1.00713	1.0286	0.984226	0.972777	1.09713	0.984718	0.929601	1.05075	0.970543	0.940635	0.970057	1.29849	1.04676	0.98334	1.02357	0.940353	0.986295	0.91092	1.02788	0.996805	0.992627	0.995212	0.941011	0.955424	1.04645	0.981081	0.976872	0.986393	0.973653	0.976774	1.00562	1.0203	1.01471	1.00411	0.998002
38	chr1	20657073	21191910	0.963773	1.04144	1.00511	0.992528	1.01643	0.997802	0.978436	0.970251	1.00844	1.02071	1.02737	1.00713	1.0286	0.984226	0.972777	1.09713	0.984718	0.929601	1.05075	0.970543	0.940635	0.970057	1.29849	1.04676	0.98334	1.02357	0.940353	0.986295	0.91092	1.02788	0.996805	0.992627	0.995212	0.941011	0.955424	1.04645	0.981081	0.976872	0.986393	0.973653	0.976774	1.00562	1.0203	1.01471	1.00411	0.998002
39	chr1	21191911	21771209	0.963773	1.04144	1.00511	0.992528	1.01643	0.997802	0.978436	0.970251	1.00844	1.02071	1.02737	1.00713	1.0286	0.984226	0.972777	1.09713	0.984718	0.929601	1.05075	0.970543	0.940635	0.970057	1.29849	1.04676	0.98334	1.02357	0.940353	0.986295	0.91092	1.02788	0.996805	0.992627	0.995212	0.941011	0.955424	1.04645	0.981081	0.976872	0.986393	0.973653	0.976774	1.00562	1.0203	1.01471	1.00411	0.998002
40	chr1	21771210	22320818	0.963773	1.04144	1.00511	0.992528	1.01643	0.997802	0.978436	0.970251	1.00844	1.02071	1.02737	1.00713	1.0286	0.984226	0.972777	1.09713	0.984718	0.929601	1.05075	0.970543	0.940635	0.970057	1.29849	1.04676	0.98334	1.02357	0.940353	0.986295	0.91092	1.02788	0.996805	0.992627	0.995212	0.941011	0.955424	1.04645	0.981081	0.976872	0.986393	0.973653	0.976774	1.00562	1.0203	1.01471	1.00411	0.998002
41	chr1	22320819	22870773	0.963773	1.04144	1.00511	0.992528	1.01643	0.997802	0.978436	0.970251	1.00844	1.02071	1.02737	1.00713	1.0286	0.984226	0.972777	1.09713	0.984718	0.929601	1.05075	0.970543	0.940635	0.970057	0.984423	1.04676	0.98334	1.02357	0.940353	0.986295	0.91092	1.02788	0.996805	0.992627	0.995212	0.941011	0.955424	1.04645	0.981081	0.976872	0.986393	0.973653	0.976774	1.00562	1.0203	1.01471	1.00411	0.998002
42	chr1	22870774	23425045	0.963773	1.04144	1.00511	0.992528	1.01643	0.997802	0.978436	0.970251	1.00844	1.02071	1.02737	1.00713	1.0286	0.984226	0.972777	1.09713	0.984718	0.929601	1.05075	0.970543	0.940635	0.970057	0.984423	1.04676	0.98334	1.02357	0.940353	0.986295	0.91092	1.02788	0.996805	0.992627	0.995212	0.941011	0.955424	1.04645	0.981081	0.976872	0.986393	0.973653	0.976774	1.00562	1.0203	1.01471	1.00411	0.998002
43	chr1	23425046	23996176	0.963773	1.04144	1.00511	0.992528	1.01643	0.997802	0.978436	0.970251	1.00844	1.02071	1.02737	1.00713	1.0286	0.984226	0.972777	1.09713	0.984718	0.929601	1.05075	0.970543	0.940635	0.970057	0.984423	1.04676	0.98334	1.02357	0.940353	0.986295	0.91092	1.02788	0.996805	0.992627	0.995212	0.941011	0.955424	1.04645	0.981081	0.976872	0.986393	0.973653	0.976774	1.00562	1.0203	1.01471	1.00411	0.998002
44	chr1	23996177	24601474	0.963773	1.04144	1.00511	0.992528	1.01643	0.997802	0.978436	0.970251	1.00844	1.02071	1.02737	1.00713	1.0286	0.984226	0.972777	1.09713	0.984718	0.929601	1.05075	0.970543	0.940635	0.970057	0.984423	1.04676	0.98334	1.02357	0.940353	0.986295	0.91092	1.02788	0.996805	0.992627	0.995212	0.941011	0.955424	1.04645	0.981081	0.976872	0.986393	0.973653	0.976774	1.00562	1.0203	1.01471	1.00411	0.998002
45	chr1	24601475	25144932	0.963773	1.04144	1.00511	0.992528	1.01643	0.997802	0.978436	0.970251	1.00844	1.02071	1.02737	1.00713	1.0286	0.984226	0.972777	1.09713	0.984718	0.929601	1.05075	0.970543	0.940635	0.970057	0.984423	1.04676	0.98334	1.02357	0.940353	0.986295	0.91092	1.02788	0.996805	0.992627	0.995212	0.941011	0.955424	1.04645	0.981081	0.976872	0.986393	0.973653	0.976774	1.00562	1.0203	1.01471	1.00411	0.998002
46	chr1	25144933	25701803	0.963773	1.04144	1.00511	0.992528	1.01643	0.997802	0.978436	0.970251	1.00844	1.02071	1.02737	1.00713	1.0286	0.984226	0.972777	1.09713	0.984718	0.929601	1.05075	0.970543	0.940635	0.970057	0.984423	1.04676	0.98334	1.02357	0.940353	0.986295	0.91092	1.02788	0.996805	0.992627	0.995212	0.941011	0.955424	1.04645	0.981081	0.976872	0.986393	0.973653	0.976774	1.00562	1.0203	1.01471	1.00411	0.998002
47	chr1	25701804	26231254	0.963773	1.04144	1.00511	0.992528	1.01643	0.997802	0.978436	0.970251	1.00844	1.02071	1.02737	1.00713	1.0286	0.984226	0.972777	1.09713	0.984718	0.929601	1.05075	0.970543	0.940635	0.970057	0.984423	1.04676	0.98334	1.02357	0.940353	0.986295	0.91092	1.02788	0.996805	0.992627	0.995212	0.941011	0.955424	1.04645	0.981081	0.976872	0.986393	0.973653	0.976774	1.00562	1.0203	1.01471	1.00411	0.998002
48	chr1	26231255	26818114	0.963773	1.04144	1.00511	0.992528	1.01643	0.997802	0.978436	0.970251	1.00844	1.02071	1.02737	1.00713	1.0286	0.984226	0.972777	1.09713	0.984718	0.929601	1.05075	0.970543	0.940635	0.970057	0.984423	1.04676	0.98334	1.02357	0.940353	0.986295	0.91092	1.02788	0.996805	0.992627	0.995212	0.941011	0.955424	1.04645	0.981081	0.976872	0.986393	0.973653	0.976774	1.00562	1.0203	1.01471	1.00411	0.998002
49	chr1	26818115	27421923	0.963773	1.04144	1.00511	0.992528	1.01643	0.997802	0.978436	0.970251	1.00844	1.02071	1.02737	1.00713	1.0286	0.984226	0.972777	1.09713	0.984718	0.929601	1.05075	0.970543	0.940635	0.970057	0.984423	1.04676	0.98334	1.02357	0.940353	0.986295	0.91092	1.02788	0.996805	0.992627	0.995212	0.941011	0.955424	1.04645	0.981081	0.976872	0.986393	0.973653	0.976774	1.00562	1.0203	1.01471	1.00411	0.998002
50	chr1	27421924	28012622	0.963773	1.04144	1.00511	0.992528	1.01643	0.997802	0.978436	0.970251	1.00844	1.02071	1.02737	1.00713	1.0286	0.984226	0.972777	1.09713	0.984718	0.929601	1.05075	0.970543	0.940635	0.970057	0.984423	1.04676	0.98334	1.02357	0.940353	0.986295	0.91092	1.02788	0.996805	0.992627	0.995212	0.941011	0.955424	1.04645	0.981081	0.976872	0.986393	0.973653	0.976774	1.00562	1.0203	1.01471	1.00411	0.998002
51	chr1	28012623	28574773	0.963773	1.04144	1.00511	0.992528	1.01643	0.997802	0.978436	0.970251	1.00844	1.02071	1.02737	1.00713	1.0286	0.984226	0.972777	1.09713	0.984718	0.929601	1.05075	0.970543	0.940635	0.970057	0.984423	1.04676	0.98334	1.02357	0.940353	0.986295	0.91092	1.02788	0.996805	0.992627	0.995212	0.941011	0.955424	1.04645	0.981081	0.976872	0.986393	0.973653	0.976774	1.00562	1.0203	1.01471	1.00411	0.998002
52	chr1	28574774	29208302	0.963773	1.04144	1.00511	0.992528	1.01643	0.997802	0.978436	0.970251	1.00844	1.02071	1.02737	1.00713	1.0286	0.984226	0.972777	1.09713	0.984718	0.929601	1.05075	0.970543	0.940635	0.970057	0.984423	1.04676	0.98334	1.02357	0.940353	0.986295	0.91092	1.02788	0.996805	0.992627	0.995212	0.941011	0.955424	1.04645	0.981081	0.976872	0.986393	0.973653	0.976774	1.00562	1.0203	1.01471	1.00411	0.998002
53	chr1	29208303	29779538	0.963773	1.04144	1.00511	0.992528	1.01643	0.997802	0.978436	0.970251	1.00844	1.02071	1.02737	1.00713	1.0286	0.984226	0.972777	1.09713	0.984718	0.929601	1.05075	0.970543	0.940635	0.970057	0.984423	1.04676	0.98334	1.02357	0.940353	0.986295	0.91092	1.02788	0.996805	0.992627	0.995212	0.941011	0.955424	1.04645	0.981081	0.976872	0.986393	0.973653	0.976774	1.00562	1.0203	1.01471	1.00411	0.998002
54	chr1	29779539	30452198	0.963773	1.04144	1.00511	0.992528	1.01643	0.997802	0.978436	0.970251	1.00844	1.02071	1.02737	1.00713	1.0286	0.984226	0.972777	1.09713	0.984718	0.929601	1.05075	0.970543	0.940635	0.970057	0.984423	1.04676	0.98334	1.02357	0.940353	0.986295	0.91092	1.02788	0.996805	0.992627	0.995212	0.941011	0.955424	1.04645	0.981081	0.976872	0.986393	0.973653	0.976774	1.00562	1.0203	1.01471	1.00411	0.998002
55	chr1	30452199	30981922	0.963773	1.04144	1.00511	0.992528	1.01643	0.997802	0.978436	0.970251	1.00844	1.02071	1.02737	1.00713	1.0286	0.984226	0.972777	1.09713	0.984718	0.929601	1.05075	0.970543	0.940635	0.970057	0.984423	1.04676	0.98334	1.02357	0.940353	0.986295	0.91092	1.02788	0.996805	0.992627	0.995212	0.941011	0.955424	1.04645	0.981081	0.976872	0.986393	0.973653	0.976774	1.00562	1.0203	1.01471	1.00411	0.998002
56	chr1	30981923	31519969	0.963773	1.04144	1.00511	0.992528	1.01643	0.997802	0.978436	0.970251	1.00844	1.02071	1.02737	1.00713	1.0286	0.984226	0.972777	1.09713	0.984718	0.929601	1.05075	0.970543	0.940635	0.970057	0.984423	1.04676	0.98334	1.02357	0.940353	0.986295	0.91092	1.02788	0.996805	0.992627	0.995212	0.941011	0.955424	1.04645	0.981081	0.976872	0.986393	0.973653	0.976774	1.00562	1.0203	1.01471	1.00411	0.998002
57	chr1	31519970	32096490	0.963773	1.04144	1.00511	0.992528	1.01643	0.997802	0.978436	0.970251	1.00844	1.02071	1.02737	1.00713	1.0286	0.984226	0.972777	1.09713	0.984718	0.929601	1.05075	0.970543	0.940635	0.970057	0.984423	1.04676	0.98334	1.02357	0.940353	0.986295	0.91092	1.02788	0.996805	0.992627	0.995212	0.941011	0.955424	1.04645	0.981081	0.976872	0.986393	0.973653	0.976774	1.00562	1.0203	1.01471	1.00411	0.998002
58	chr1	32096491	32625382	0.963773	1.04144	1.00511	0.992528	1.01643	0.997802	0.978436	0.970251	1.00844	1.02071	0.61996	1.00713	1.0286	0.984226	0.972777	1.09713	0.984718	0.698933	1.05075	0.970543	0.940635	0.970057	0.984423	1.04676	0.98334	1.02357	0.940353	0.986295	0.91092	1.02788	0.996805	0.992627	0.995212	0.941011	0.955424	1.04645	0.981081	0.976872	0.986393	0.973653	0.976774	1.00562	1.0203	1.01471	1.00411	0.998002
59	chr1	32625383	33223021	0.963773	1.04144	1.00511	0.992528	1.01643	0.997802	0.978436	0.970251	1.00844	1.02071	0.61996	1.00713	1.0286	0.984226	0.972777	1.09713	0.984718	0.698933	1.05075	0.970543	0.940635	0.970057	0.984423	1.04676	0.98334	1.02357	0.940353	0.986295	0.91092	1.02788	0.996805	0.992627	0.995212	0.941011	0.955424	1.04645	0.981081	0.976872	0.986393	0.973653	0.976774	1.00562	1.0203	1.01471	1.00411	0.998002
60	chr1	33223022	33787824	0.963773	1.04144	1.00511	0.992528	1.01643	0.997802	0.978436	0.970251	1.00844	1.02071	0.61996	1.00713	1.0286	0.984226	0.972777	1.09713	0.984718	0.698933	1.05075	0.970543	0.940635	0.970057	0.984423	1.04676	0.98334	1.02357	0.940353	0.986295	0.91092	1.02788	0.996805	0.992627	0.995212	0.941011	0.955424	1.04645	0.981081	0.976872	0.986393	0.973653	0.976774	1.00562	1.0203	1.01471	1.00411	0.998002
61	chr1	33787825	34312960	0.963773	1.04144	1.00511	0.992528	1.01643	0.997802	0.978436	0.970251	1.00844	1.02071	0.61996	1.00713	1.0286	0.984226	0.972777	1.09713	0.984718	0.698933	1.05075	0.970543	0.940635	0.970057	0.984423	1.04676	0.98334	1.02357	0.940353	0.986295	0.91092	1.02788	0.996805	0.992627	0.995212	0.941011	0.955424	1.04645	0.981081	0.976872	0.986393	0.973653	0.976774	1.00562	1.0203	1.01471	1.00411	0.998002
62	chr1	34312961	34842725	0.963773	1.04144	1.00511	0.992528	1.01643	0.997802	0.978436	0.970251	1.00844	1.02071	1.05369	1.00713	1.0286	0.984226	0.972777	1.09713	0.984718	0.698933	1.05075	0.970543	0.940635	0.970057	0.984423	1.04676	0.98334	1.02357	0.940353	0.986295	0.91092	1.02788	0.996805	0.992627	0.995212	0.941011	0.955424	1.04645	0.981081	0.976872	0.986393	0.973653	0.976774	1.00562	1.0203	1.01471	1.00411	0.998002
63	chr1	34842726	35408055	0.963773	1.04144	1.00511	0.992528	1.01643	0.997802	0.978436	0.970251	1.00844	1.02071	1.05369	1.00713	1.0286	0.984226	0.972777	1.09713	0.984718	0.698933	1.05075	0.970543	0.940635	0.970057	0.984423	1.04676	0.98334	1.02357	0.940353	0.986295	0.91092	1.02788	0.996805	0.992627	0.995212	0.941011	0.955424	1.04645	0.981081	0.976872	0.986393	0.973653	0.976774	1.00562	1.0203	1.01471	1.00411	0.998002
64	chr1	35408056	36003712	0.963773	1.04144	1.00511	0.992528	1.01643	0.997802	0.978436	0.970251	1.00844	1.02071	1.05369	1.00713	1.0286	0.984226	0.972777	1.09713	0.984718	0.698933	1.05075	0.970543	0.940635	0.970057	0.984423	1.04676	0.98334	1.02357	0.940353	0.986295	0.91092	1.02788	0.996805	0.992627	0.995212	0.941011	0.955424	1.04645	0.981081	0.976872	0.986393	0.973653	0.976774	1.00562	1.0203	1.01471	1.00411	0.998002
65	chr1	36003713	36599470	0.963773	1.04144	1.00511	0.992528	1.01643	0.997802	0.978436	0.970251	1.00844	1.02071	1.05369	1.00713	1.0286	0.984226	0.972777	1.09713	0.984718	0.698933	1.05075	0.970543	0.940635	0.970057	0.984423	1.04676	0.98334	1.02357	0.940353	0.986295	0.91092	1.02788	0.996805	0.992627	0.995212	0.941011	0.955424	1.04645	0.981081	0.976872	0.986393	0.973653	0.976774	1.00562	1.0203	1.01471	1.00411	0.998002
66	chr1	36599471	37155519	0.963773	1.04144	1.00511	0.992528	1.01643	0.997802	0.978436	0.970251	1.00844	1.02071	1.05369	1.00713	1.0286	0.984226	0.972777	1.09713	0.984718	0.698933	1.05075	0.970543	0.940635	0.970057	0.984423	1.04676	0.98334	1.02357	0.940353	0.986295	0.91092	1.02788	0.996805	0.992627	0.995212	0.941011	0.955424	1.04645	0.981081	0.976872	0.986393	0.973653	0.976774	1.00562	1.0203	1.01471	1.00411	0.998002
67	chr1	37155520	37693437	0.963773	1.04144	1.00511	0.992528	1.01643	0.997802	0.978436	0.970251	1.00844	1.02071	1.05369	1.00713	1.0286	0.984226	0.972777	1.09713	0.984718	0.452214	1.05075	0.970543	0.940635	0.970057	0.984423	1.04676	0.98334	1.02357	0.940353	0.986295	0.91092	1.02788	0.996805	0.992627	0.995212	0.941011	0.955424	1.04645	0.981081	0.976872	0.986393	0.973653	0.976774	1.00562	1.0203	1.01471	1.00411	0.998002
68	chr1	37693438	38249839	0.963773	1.04144	1.00511	0.992528	1.01643	0.997802	0.978436	0.970251	1.00844	1.02071	1.05369	1.00713	1.0286	0.984226	0.972777	1.09713	0.984718	0.452214	1.05075	0.970543	0.940635	0.970057	0.984423	1.04676	0.98334	1.02357	0.940353	0.986295	0.91092	1.02788	0.996805	0.992627	0.995212	0.941011	0.955424	1.04645	0.981081	0.976872	0.986393	0.973653	0.976774	1.00562	1.0203	1.01471	1.00411	0.998002
69	chr1	38249840	38823731	0.963773	1.04144	1.00511	0.992528	1.01643	0.997802	0.978436	0.970251	1.00844	1.02071	1.05369	1.00713	1.0286	0.984226	0.972777	1.09713	0.984718	0.452214	1.05075	0.970543	0.940635	0.970057	0.984423	1.04676	0.98334	1.02357	0.940353	0.986295	0.91092	1.02788	0.996805	0.992627	0.995212	0.941011	0.955424	1.04645	0.981081	0.976872	0.986393	0.973653	0.976774	1.00562	1.0203	1.01471	1.00411	0.998002
70	chr1	38823732	39375246	0.963773	1.04144	1.00511	0.992528	1.01643	0.997802	0.978436	0.970251	1.00844	1.02071	1.05369	1.00713	1.0286	0.984226	0.972777	1.09713	0.984718	0.452214	1.05075	0.970543	0.940635	0.970057	0.984423	1.04676	0.98334	1.02357	0.940353	0.986295	0.91092	1.02788	0.996805	0.992627	0.995212	0.941011	0.955424	1.04645	0.981081	0.976872	0.986393	0.973653	0.976774	1.00562	1.0203	1.01471	1.00411	0.998002
71	chr1	39375247	39959040	0.963773	1.04144	1.00511	0.992528	1.01643	0.997802	0.978436	0.970251	1.00844	1.02071	1.05369	1.00713	1.0286	0.984226	0.972777	1.09713	0.984718	0.452214	1.05075	0.970543	0.940635	0.970057	0.984423	1.04676	0.98334	1.02357	0.940353	0.986295	0.91092	1.02788	0.996805	0.992627	0.995212	0.941011	0.955424	1.04645	0.981081	0.976872	0.986393	0.973653	0.976774	1.00562	1.0203	1.01471	1.00411	0.998002
72	chr1	39959041	40536560	0.963773	1.04144	1.00511	0.992528	1.01643	0.997802	0.978436	0.970251	1.00844	1.02071	1.05369	1.00713	1.0286	0.984226	0.972777	1.09713	0.984718	0.452214	1.05075	0.970543	0.940635	0.970057	0.984423	1.04676	0.98334	1.02357	0.940353	0.986295	0.91092	1.02788	0.996805	0.992627	0.995212	0.941011	0.955424	1.04645	0.981081	0.976872	0.986393	0.973653	0.976774	1.00562	1.0203	1.01471	1.00411	0.998002
73	chr1	40536561	41101982	0.963773	1.04144	1.00511	0.992528	1.01643	0.997802	0.978436	0.970251	1.00844	1.02071	1.05369	1.00713	1.0286	0.984226	0.972777	1.09713	0.984718	0.452214	1.05075	0.970543	0.940635	0.970057	0.984423	1.04676	0.98334	1.02357	0.940353	0.986295	0.91092	1.02788	0.996805	0.992627	0.995212	0.941011	0.955424	1.04645	0.981081	0.976872	0.986393	0.973653	0.976774	1.00562	1.0203	1.01471	1.00411	0.998002
74	chr1	41101983	41653464	0.963773	1.04144	1.00511	0.992528	1.01643	0.997802	0.978436	0.970251	1.00844	1.02071	1.05369	1.00713	1.0286	0.984226	0.972777	1.09713	0.984718	0.452214	1.05075	0.970543	0.940635	0.970057	0.984423	1.04676	0.98334	1.02357	0.940353	0.986295	0.91092	1.02788	0.996805	0.992627	0.995212	0.941011	0.955424	1.04645	0.981081	0.976872	0.986393	0.973653	0.976774	1.00562	1.0203	1.01471	1.00411	0.998002
75	chr1	41653465	42179477	0.963773	1.04144	1.00511	0.992528	1.01643	0.997802	0.978436	0.970251	1.00844	1.02071	1.05369	1.00713	1.0286	0.984226	0.972777	1.09713	0.984718	0.636036	1.05075	0.970543	0.940635	0.970057	0.984423	1.04676	0.98334	1.02357	0.940353	0.986295	0.91092	1.02788	0.996805	0.992627	0.995212	0.941011	0.955424	1.04645	0.981081	0.976872	0.986393	0.973653	0.976774	1.00562	1.0203	1.01471	1.00411	0.998002
76	chr1	42179478	42724209	0.963773	1.04144	1.00511	0.992528	1.01643	0.997802	0.978436	0.970251	1.00844	1.02071	1.05369	1.00713	1.0286	0.984226	0.972777	1.09713	0.984718	0.636036	1.05075	0.970543	0.940635	0.970057	0.984423	1.04676	0.98334	1.02357	0.940353	0.986295	0.91092	1.02788	0.996805	0.992627	0.995212	0.941011	0.955424	1.04645	0.981081	0.976872	0.986393	0.973653	0.976774	1.00562	1.0203	1.01471	1.00411	0.998002
77	chr1	42724210	43266978	0.963773	1.04144	1.00511	0.992528	1.01643	0.997802	0.978436	0.970251	1.00844	1.02071	1.05369	1.00713	1.0286	0.984226	0.972777	1.09713	0.984718	0.636036	1.05075	0.970543	0.940635	0.970057	0.984423	1.04676	0.98334	1.02357	0.940353	0.986295	0.91092	1.02788	0.996805	0.992627	0.995212	0.941011	0.955424	1.04645	0.981081	0.976872	0.986393	0.973653	0.976774	1.00562	1.0203	1.01471	1.00411	0.998002
78	chr1	43266979	43838843	0.963773	1.04144	1.00511	0.992528	1.01643	0.997802	0.978436	0.970251	1.00844	1.02071	1.05369	1.00713	1.0286	0.984226	0.972777	1.09713	0.984718	0.636036	1.05075	0.970543	0.940635	0.970057	0.984423	1.04676	0.98334	1.02357	0.940353	0.986295	0.91092	1.02788	0.996805	0.992627	0.995212	0.941011	0.955424	1.04645	0.981081	0.976872	0.986393	0.973653	0.976774	1.00562	1.0203	1.01471	1.00411	0.998002
79	chr1	43838844	44369899	0.963773	1.04144	1.00511	0.992528	1.01643	0.997802	0.978436	0.970251	1.00844	1.02071	1.05369	1.00713	1.0286	0.984226	0.972777	0.948285	0.984718	0.636036	1.05075	0.970543	0.940635	0.970057	0.984423	1.04676	0.98334	1.02357	0.940353	0.986295	0.91092	1.02788	0.996805	0.992627	0.995212	0.941011	0.955424	1.04645	0.981081	0.976872	0.986393	0.973653	0.976774	1.00562	1.0203	1.01471	1.00411	0.998002
80	chr1	44369900	44896260	0.963773	1.04144	1.00511	0.992528	1.01643	0.997802	0.978436	0.970251	1.00844	1.02071	1.05369	1.00713	1.0286	0.984226	0.972777	0.948285	0.984718	0.636036	1.05075	0.970543	0.940635	0.970057	0.984423	1.04676	0.98334	1.02357	0.940353	0.986295	0.91092	1.02788	0.996805	0.992627	0.995212	0.941011	0.955424	1.04645	0.981081	0.976872	0.986393	0.973653	0.976774	1.00562	1.0203	1.01471	1.00411	0.998002
81	chr1	44896261	45473401	0.963773	1.04144	1.00511	0.992528	1.01643	0.997802	0.978436	0.970251	1.00844	1.02071	1.05369	1.00713	1.0286	0.984226	0.972777	0.948285	0.984718	0.636036	1.05075	0.970543	0.940635	0.970057	0.984423	1.04676	0.98334	1.02357	0.940353	0.986295	0.91092	1.02788	0.996805	0.992627	0.995212	0.941011	0.955424	1.04645	0.981081	0.976872	0.986393	0.973653	0.976774	1.00562	1.0203	1.01471	1.00411	0.998002
82	chr1	45473402	46086723	0.963773	1.04144	1.00511	0.992528	1.01643	0.997802	0.978436	0.970251	1.00844	1.02071	1.05369	1.00713	1.0286	0.984226	0.972777	0.948285	0.984718	0.636036	1.05075	0.970543	0.940635	0.970057	0.984423	1.04676	0.98334	1.02357	0.940353	0.986295	0.91092	1.02788	0.996805	0.992627	0.995212	0.941011	0.955424	1.04645	0.981081	0.976872	0.986393	0.973653	0.976774	1.00562	1.0203	1.01471	1.00411	0.998002
83	chr1	46086724	46638763	0.963773	1.04144	1.00511	0.992528	1.01643	0.997802	0.978436	0.970251	1.00844	1.02071	1.05369	1.00713	1.0286	0.984226	0.972777	0.948285	0.984718	0.636036	1.05075	0.970543	0.940635	0.970057	0.984423	1.04676	0.98334	1.02357	0.940353	0.986295	0.91092	1.02788	0.996805	0.992627	0.995212	0.941011	0.955424	1.04645	0.981081	0.976872	0.986393	0.973653	0.976774	1.00562	1.0203	1.01471	1.00411	0.998002
84	chr1	46638764	47229412	0.963773	1.04144	1.00511	0.992528	1.01643	0.997802	0.978436	0.970251	1.00844	1.02071	1.05369	1.00713	1.0286	0.984226	0.972777	0.948285	0.984718	0.636036	1.05075	0.970543	0.940635	0.970057	0.984423	1.04676	0.98334	1.02357	0.940353	0.986295	0.91092	1.02788	0.996805	0.992627	0.995212	0.941011	0.955424	1.04645	0.981081	0.976872	0.986393	0.973653	0.976774	1.00562	1.0203	1.01471	1.00411	0.998002
85	chr1	47229413	47818347	0.963773	1.04144	1.00511	0.992528	1.01643	0.997802	0.978436	0.970251	1.00844	1.02071	1.05369	1.00713	1.0286	0.984226	0.972777	0.948285	0.984718	0.636036	1.05075	0.970543	0.940635	0.970057	0.984423	1.04676	0.98334	1.02357	0.940353	0.986295	0.91092	1.02788	0.996805	0.992627	0.995212	0.941011	0.955424	1.04645	0.981081	0.976872	0.986393	0.973653	0.976774	1.00562	1.0203	1.01471	1.00411	0.998002
86	chr1	47818348	48362489	0.963773	1.04144	1.00511	0.992528	1.01643	0.997802	0.978436	0.970251	1.00844	1.02071	1.05369	1.00713	1.0286	0.984226	0.972777	0.948285	0.984718	0.636036	1.05075	0.970543	0.940635	0.970057	0.984423	1.04676	0.98334	1.02357	0.940353	0.986295	0.91092	1.02788	0.996805	0.992627	0.995212	0.941011	0.955424	1.04645	0.981081	0.976872	0.986393	0.973653	0.976774	1.00562	1.0203	1.01471	1.00411	0.998002
87	chr1	48362490	48972064	0.963773	1.04144	1.00511	0.992528	1.01643	0.997802	0.978436	0.970251	1.00844	1.02071	1.05369	1.00713	1.0286	0.984226	0.972777	0.948285	0.984718	0.636036	1.05075	0.970543	0.940635	0.970057	0.984423	1.04676	0.98334	1.02357	0.940353	0.986295	0.91092	1.02788	0.996805	0.992627	0.995212	0.941011	0.955424	1.04645	0.981081	0.976872	0.986393	0.973653	0.976774	1.00562	1.0203	1.01471	1.00411	0.998002
88	chr1	48972065	49493460	0.963773	1.04144	1.00511	0.992528	1.01643	0.997802	0.978436	0.970251	1.00844	1.02071	1.05369	1.00713	1.0286	0.984226	0.972777	0.948285	0.984718	0.636036	1.05075	0.970543	0.940635	0.970057	0.984423	1.04676	0.98334	1.02357	0.940353	0.986295	0.91092	1.02788	0.996805	0.992627	0.995212	0.941011	0.955424	1.04645	0.981081	0.976872	0.986393	0.973653	0.976774	1.00562	1.0203	1.01471	1.00411	0.998002
89	chr1	49493461	50109280	0.963773	1.04144	1.00511	0.992528	1.01643	0.997802	0.978436	0.970251	1.00844	1.02071	1.05369	1.00713	1.0286	0.984226	0.972777	0.948285	0.984718	0.848063	1.05075	0.970543	0.940635	0.970057	0.984423	1.04676	0.98334	1.02357	0.940353	0.986295	0.91092	1.02788	0.996805	0.992627	0.995212	0.941011	0.955424	1.04645	0.981081	0.976872	0.986393	0.973653	0.976774	1.00562	1.0203	1.01471	1.00411	0.998002
90	chr1	50109281	50730238	0.963773	1.04144	1.00511	0.992528	1.01643	0.997802	0.978436	0.970251	1.00844	1.02071	1.05369	1.00713	1.0286	0.984226	0.972777	0.948285	0.984718	0.848063	1.05075	0.970543	0.940635	0.970057	0.984423	1.04676	0.98334	1.02357	0.940353	0.986295	0.91092	1.02788	0.996805	0.992627	0.995212	0.941011	0.955424	1.04645	0.981081	0.976872	0.986393	0.973653	0.976774	1.00562	1.0203	1.01471	1.00411	0.998002
91	chr1	50730239	51299293	0.963773	1.04144	1.00511	0.992528	1.01643	0.997802	0.978436	0.970251	1.00844	1.02071	1.05369	1.00713	1.0286	0.984226	0.972777	0.948285	0.984718	0.848063	1.05075	0.970543	0.940635	0.970057	0.984423	1.04676	0.98334	1.02357	0.940353	0.986295	0.91092	1.02788	0.996805	0.992627	0.995212	0.941011	0.955424	1.04645	0.981081	0.976872	0.986393	0.973653	0.976774	1.00562	1.0203	1.01471	1.00411	0.998002
92	chr1	51299294	51904002	0.963773	1.04144	1.00511	0.992528	1.01643	0.997802	0.978436	0.970251	1.00844	1.02071	1.05369	1.00713	1.0286	0.984226	0.972777	0.948285	0.984718	0.848063	1.05075	0.970543	0.940635	0.970057	0.984423	1.04676	0.98334	1.02357	0.940353	0.986295	0.91092	1.02788	0.996805	0.992627	0.995212	0.941011	0.955424	1.04645	0.981081	0.976872	0.986393	0.973653	0.976774	1.00562	1.0203	1.01471	1.00411	0.998002
93	chr1	51904003	52463253	0.963773	1.04144	1.00511	0.992528	1.01643	0.997802	0.978436	0.970251	1.00844	1.02071	1.05369	1.00713	1.0286	0.984226	0.972777	0.948285	0.984718	0.848063	1.05075	0.970543	0.940635	0.970057	0.984423	1.04676	0.98334	1.02357	0.940353	0.986295	0.91092	1.02788	0.996805	0.992627	0.995212	0.941011	0.955424	1.04645	0.981081	0.976872	0.986393	0.973653	0.976774	1.00562	1.0203	1.01471	1.00411	0.998002
94	chr1	52463254	53030839	0.963773	1.04144	1.00511	0.992528	1.01643	0.997802	0.978436	0.970251	1.00844	1.02071	1.05369	1.00713	1.0286	0.984226	0.972777	0.948285	0.984718	0.848063	1.05075	0.970543	0.940635	0.970057	0.984423	1.04676	0.98334	1.02357	0.940353	0.986295	0.91092	1.02788	0.996805	0.992627	0.995212	0.941011	0.955424	1.04645	0.981081	0.976872	0.986393	0.973653	0.976774	1.00562	1.0203	1.01471	1.00411	0.998002
95	chr1	53030840	53588165	0.963773	1.04144	1.00511	0.992528	1.01643	0.997802	0.978436	0.970251	1.00844	1.02071	1.05369	1.00713	1.0286	0.984226	0.972777	0.948285	0.984718	0.848063	1.05075	0.970543	0.940635	0.970057	0.984423	1.04676	0.98334	1.02357	0.940353	0.986295	0.91092	1.02788	0.996805	0.992627	0.995212	0.941011	0.955424	1.04645	0.981081	0.976872	0.986393	0.973653	0.976774	1.00562	1.0203	1.01471	1.00411	0.998002
96	chr1	53588166	54115281	0.963773	1.04144	1.00511	0.992528	1.01643	0.997802	0.978436	0.970251	1.00844	1.02071	1.05369	1.00713	1.0286	0.984226	0.972777	0.948285	0.984718	0.848063	1.05075	0.970543	0.940635	0.970057	0.984423	1.04676	0.98334	1.02357	0.940353	0.986295	0.91092	1.02788	0.996805	0.992627	0.995212	0.941011	0.955424	1.04645	0.981081	0.976872	0.986393	0.973653	0.976774	1.00562	1.0203	1.01471	1.00411	0.998002
97	chr1	54115282	54649783	0.963773	1.04144	1.00511	0.992528	1.01643	0.997802	0.978436	0.970251	1.00844	1.02071	1.05369	1.00713	1.0286	0.984226	0.972777	0.948285	0.984718	0.848063	1.05075	0.970543	0.940635	0.970057	0.984423	1.04676	0.98334	1.02357	0.940353	0.986295	0.91092	1.02788	0.996805	0.992627	0.995212	0.941011	0.955424	1.04645	0.981081	0.976872	0.986393	0.973653	0.976774	1.00562	1.0203	1.01471	1.00411	0.998002
98	chr1	54649784	55211782	0.963773	1.04144	1.00511	0.992528	1.01643	0.997802	0.978436	0.970251	1.00844	1.02071	1.05369	1.00713	1.0286	0.984226	0.972777	0.948285	0.984718	0.848063	1.05075	0.970543	0.940635	0.970057	0.984423	1.04676	0.98334	1.02357	0.940353	0.986295	0.91092	1.02788	0.996805	0.992627	0.995212	0.941011	0.955424	1.04645	0.981081	0.976872	0.986393	0.973653	0.976774	1.00562	1.0203	1.01471	1.00411	0.998002
99	chr1	55211783	55766938	0.963773	1.04144	1.00511	0.992528	1.01643	0.997802	0.978436	0.970251	1.00844	1.02071	1.05369	1.00713	1.0286	0.984226	0.972777	0.948285	0.984718	0.848063	1.05075	0.970543	0.940635	0.970057	0.984423	1.04676	0.98334	1.02357	0.940353	0.986295	0.91092	1.02788	0.996805	0.992627	0.995212	0.941011	0.955424	1.04645	0.981081	0.976872	0.986393	0.973653	0.976774	1.00562	1.0203	1.01471	1.00411	0.998002
100	chr1	55766939	56288049	0.963773	1.04144	1.00511	0.992528	1.01643	0.997802	0.978436	0.970251	1.00844	1.02071	1.05369	1.00713	1.0286	0.984226	0.972777	0.948285	0.984718	0.848063	1.05075	0.970543	0.940635	0.970057	0.984423	1.04676	0.98334	1.02357	0.940353	0.986295	0.91092	1.02788	0.996805	0.992627	0.995212	0.941011	0.955424	1.04645	0.981081	0.976872	0.986393	0.973653	0.976774	1.00562	1.0203	1.01471	1.00411	0.998002
101	chr1	56288050	56830750	0.963773	1.04144	1.00511	0.992528	1.01643	0.997802	0.978436	0.970251	1.00844	1.02071	1.05369	1.00713	1.0286	0.984226	0.972777	0.948285	0.984718	0.848063	1.05075	0.970543	0.940635	0.970057	0.984423	1.04676	0.98334	1.02357	0.940353	0.986295	0.91092	1.02788	0.996805	0.992627	0.995212	0.941011	0.955424	1.04645	0.981081	0.976872	0.986393	0.973653	0.976774	1.00562	1.0203	1.01471	1.00411	0.998002
102	chr1	56830751	57386130	0.963773	1.04144	1.00511	0.992528	1.01643	0.997802	0.978436	0.970251	1.00844	1.02071	1.05369	1.00713	1.0286	0.984226	0.972777	0.948285	0.984718	0.848063	1.05075	0.970543	0.940635	0.970057	0.984423	1.04676	0.98334	1.02357	0.940353	0.986295	0.91092	1.02788	0.996805	0.992627	0.995212	0.941011	0.955424	1.04645	0.981081	0.976872	0.986393	0.973653	0.976774	1.00562	1.0203	1.01471	1.00411	0.998002
103	chr1	57386131	57895993	0.963773	1.04144	1.00511	0.992528	1.01643	0.997802	0.978436	0.970251	1.00844	1.02071	1.05369	1.00713	1.0286	0.984226	0.972777	0.948285	0.984718	0.848063	1.05075	0.970543	0.940635	0.970057	0.984423	1.04676	0.98334	1.02357	0.940353	0.986295	0.91092	1.02788	0.996805	0.992627	0.995212	0.941011	0.955424	1.04645	0.981081	0.976872	0.986393	0.973653	0.976774	1.00562	1.0203	1.01471	1.00411	0.998002
104	chr1	57895994	58421433	0.963773	1.04144	1.00511	0.992528	1.01643	0.997802	0.978436	0.970251	1.00844	1.02071	1.05369	1.00713	1.0286	0.984226	0.972777	0.948285	0.984718	0.848063	1.05075	0.970543	0.940635	0.970057	0.984423	1.04676	0.98334	1.02357	0.940353	0.986295	0.91092	1.02788	0.996805	0.992627	0.995212	0.941011	0.955424	1.04645	0.981081	0.976872	0.986393	0.973653	0.976774	1.00562	1.0203	1.01471	1.00411	0.998002
105	chr1	58421434	58977395	0.963773	1.04144	1.00511	0.992528	1.01643	0.997802	0.978436	0.970251	1.00844	1.02071	1.05369	1.00713	1.0286	0.984226	0.972777	0.948285	0.984718	0.848063	1.05075	0.970543	0.940635	0.970057	0.984423	1.04676	0.98334	1.02357	0.940353	0.986295	0.91092	1.02788	0.996805	0.992627	0.995212	0.941011	0.955424	1.04645	0.981081	0.976872	0.986393	0.973653	0.976774	1.00562	1.0203	1.01471	1.00411	0.998002
106	chr1	58977396	59509713	0.963773	1.04144	1.00511	0.992528	1.01643	0.997802	0.978436	0.970251	1.00844	1.02071	1.05369	1.00713	1.0286	0.984226	0.972777	0.948285	0.984718	0.848063	1.05075	0.970543	0.940635	0.970057	0.984423	1.04676	0.98334	1.02357	0.940353	0.986295	0.91092	1.02788	0.996805	0.992627	0.995212	0.941011	0.955424	1.04645	0.981081	0.976872	0.986393	0.973653	0.976774	1.00562	1.0203	1.01471	1.00411	0.998002
107	chr1	59509714	60055403	0.963773	1.04144	1.00511	0.992528	1.01643	0.997802	0.978436	0.970251	1.00844	1.02071	1.05369	1.00713	1.0286	0.984226	0.972777	0.948285	0.984718	0.848063	1.05075	0.970543	0.940635	0.970057	0.984423	1.04676	0.98334	1.02357	0.940353	0.986295	0.91092	1.02788	0.996805	0.992627	0.995212	0.941011	0.955424	1.04645	0.981081	0.976872	0.986393	0.973653	0.976774	1.00562	1.0203	1.01471	1.00411	0.998002
108	chr1	60055404	60623973	0.963773	1.04144	1.00511	0.992528	1.01643	0.997802	0.978436	0.970251	1.00844	1.02071	1.05369	1.00713	1.0286	0.984226	0.972777	0.948285	0.984718	0.848063	1.05075	0.970543	0.940635	0.970057	0.984423	1.04676	0.98334	1.02357	0.940353	0.986295	0.91092	1.02788	0.996805	0.992627	0.995212	0.941011	0.955424	1.04645	0.981081	0.976872	0.986393	0.973653	0.976774	1.00562	1.0203	1.01471	1.00411	0.998002
109	chr1	60623974	61205575	0.963773	1.04144	1.00511	0.992528	1.01643	0.997802	0.978436	0.970251	1.00844	1.02071	1.05369	1.00713	1.0286	0.984226	0.972777	0.948285	0.984718	0.848063	1.05075	0.970543	0.940635	0.970057	0.984423	1.04676	0.98334	1.02357	0.940353	0.986295	0.91092	1.02788	0.996805	0.992627	0.995212	0.941011	0.955424	1.04645	0.981081	0.976872	0.986393	0.973653	0.976774	1.00562	1.0203	1.01471	1.00411	0.998002
110	chr1	61205576	61782793	0.963773	1.04144	1.00511	0.992528	1.01643	0.997802	0.978436	0.970251	1.00844	1.02071	1.05369	1.00713	1.0286	0.984226	0.972777	0.948285	0.984718	0.848063	1.05075	0.970543	0.940635	0.970057	0.984423	1.04676	0.98334	1.02357	0.940353	0.986295	0.91092	1.02788	0.996805	0.992627	0.995212	0.941011	0.955424	1.04645	0.981081	0.976872	0.986393	0.973653	0.976774	1.00562	1.0203	1.01471	1.00411	0.998002
111	chr1	61782794	62344198	0.963773	1.04144	1.00511	0.992528	1.01643	0.997802	0.978436	0.970251	1.00844	1.02071	1.05369	1.00713	1.0286	0.984226	0.972777	0.948285	0.984718	0.848063	1.05075	0.970543	0.940635	0.970057	0.984423	1.04676	0.98334	1.02357	0.940353	0.986295	0.91092	1.02788	0.996805	0.992627	0.995212	0.941011	0.955424	1.04645	0.981081	0.976872	0.986393	0.973653	0.976774	1.00562	1.0203	1.01471	1.00411	0.998002
112	chr1	62344199	62906604	0.963773	1.04144	1.00511	0.992528	1.01643	0.997802	0.978436	0.970251	1.00844	1.02071	1.05369	1.00713	1.0286	0.984226	0.972777	0.948285	0.984718	0.848063	1.05075	0.970543	0.940635	0.970057	0.984423	1.04676	0.98334	1.02357	0.940353	0.986295	0.91092	1.02788	0.996805	0.992627	0.995212	0.941011	0.955424	1.04645	0.981081	0.976872	0.986393	0.973653	0.976774	1.00562	1.0203	1.01471	1.00411	0.998002
113	chr1	62906605	63478235	0.963773	1.04144	1.00511	0.992528	1.01643	0.997802	0.978436	0.970251	1.00844	1.02071	1.05369	1.00713	1.0286	0.984226	0.972777	0.948285	0.984718	0.848063	1.05075	0.970543	0.940635	0.970057	0.984423	1.04676	0.98334	1.02357	0.940353	0.986295	0.91092	1.02788	0.996805	0.992627	0.995212	0.941011	0.955424	1.04645	0.981081	0.976872	0.986393	0.973653	0.976774	1.00562	1.0203	1.01471	1.00411	0.998002
114	chr1	63478236	64071010	0.963773	1.04144	1.00511	0.992528	1.01643	0.997802	0.978436	0.970251	1.00844	1.02071	1.05369	1.00713	1.0286	0.984226	0.972777	0.948285	0.984718	0.848063	1.05075	0.970543	0.940635	0.970057	0.984423	1.04676	0.98334	1.02357	0.940353	0.986295	0.91092	1.02788	0.996805	0.992627	0.995212	0.941011	0.955424	1.04645	0.981081	0.976872	0.986393	0.973653	0.976774	1.00562	1.0203	1.01471	1.00411	0.998002
115	chr1	64071011	64590948	0.963773	1.04144	1.00511	0.992528	1.01643	0.997802	0.978436	0.970251	1.00844	1.02071	1.05369	1.00713	1.0286	0.984226	0.972777	0.948285	0.984718	0.848063	1.05075	0.970543	0.940635	0.970057	0.984423	1.04676	0.98334	1.02357	0.940353	0.986295	0.91092	1.02788	0.996805	0.992627	0.995212	0.941011	0.955424	1.04645	0.981081	0.976872	0.986393	0.973653	0.976774	1.00562	1.0203	1.01471	1.00411	0.998002
116	chr1	64590949	65152884	0.963773	1.04144	1.00511	0.992528	1.01643	0.997802	0.978436	0.970251	1.00844	1.02071	1.05369	1.00713	1.0286	0.984226	0.972777	0.948285	0.984718	0.848063	1.05075	0.970543	0.940635	0.970057	0.984423	1.04676	0.98334	1.02357	0.940353	0.986295	0.91092	1.02788	0.996805	0.992627	0.995212	0.941011	0.955424	1.04645	0.981081	0.976872	0.986393	0.973653	0.976774	1.00562	1.0203	1.01471	1.00411	0.998002
117	chr1	65152885	65719562	0.963773	1.04144	1.00511	0.992528	1.01643	0.997802	0.978436	0.970251	1.00844	1.02071	1.05369	1.00713	1.0286	0.984226	0.972777	0.948285	0.984718	0.848063	1.05075	0.970543	0.940635	0.970057	0.984423	1.04676	0.98334	1.02357	0.940353	0.986295	0.91092	1.02788	0.996805	0.992627	0.995212	0.941011	0.955424	1.04645	0.981081	0.976872	0.986393	0.973653	0.976774	1.00562	1.0203	1.01471	1.00411	0.998002
118	chr1	65719563	66308609	0.963773	1.04144	1.00511	0.992528	1.01643	0.997802	0.978436	0.970251	1.00844	1.02071	1.05369	1.00713	1.0286	0.984226	0.972777	0.948285	0.984718	0.848063	1.05075	0.970543	0.940635	0.970057	0.984423	1.04676	0.98334	1.02357	0.940353	0.986295	0.91092	1.02788	0.996805	0.992627	0.995212	0.941011	0.955424	1.04645	0.981081	0.976872	0.986393	0.973653	0.976774	1.00562	1.0203	1.01471	1.00411	0.998002
119	chr1	66308610	66864235	0.963773	1.04144	1.00511	0.992528	1.01643	0.997802	0.978436	0.970251	1.00844	1.02071	1.05369	1.00713	1.0286	0.984226	0.972777	0.948285	0.984718	0.639224	1.05075	0.970543	0.940635	0.970057	0.984423	1.04676	0.98334	1.02357	0.940353	0.986295	0.91092	1.02788	0.996805	0.992627	0.995212	0.941011	0.955424	1.04645	0.981081	0.976872	0.986393	0.973653	0.976774	1.00562	1.0203	1.01471	1.00411	0.998002
120	chr1	66864236	67398338	0.963773	1.04144	1.00511	0.992528	1.01643	0.997802	0.978436	0.970251	1.00844	1.02071	1.05369	1.00713	1.0286	0.984226	0.972777	0.948285	0.984718	0.639224	1.05075	0.970543	0.940635	0.970057	0.984423	1.04676	0.98334	1.02357	0.940353	0.986295	0.91092	1.02788	0.996805	0.992627	0.995212	0.941011	0.955424	1.04645	0.981081	0.976872	0.986393	0.973653	0.976774	1.00562	1.0203	1.01471	1.00411	0.998002
121	chr1	67398339	67973173	0.963773	1.04144	1.00511	0.992528	1.01643	0.997802	0.978436	0.970251	1.00844	1.02071	1.05369	1.00713	1.0286	0.984226	0.972777	0.948285	0.984718	0.639224	1.05075	0.970543	0.940635	0.970057	0.984423	1.04676	0.98334	1.02357	0.940353	0.986295	0.91092	1.02788	0.996805	0.992627	0.995212	0.941011	0.955424	1.04645	0.981081	0.976872	0.986393	0.973653	0.976774	1.00562	1.0203	1.01471	1.00411	0.998002
122	chr1	67973174	68517982	0.963773	1.04144	1.00511	0.992528	1.01643	0.997802	0.978436	0.970251	1.00844	1.02071	1.05369	1.00713	1.0286	0.984226	0.972777	0.948285	0.984718	0.639224	1.05075	0.970543	0.940635	0.970057	0.984423	1.04676	0.98334	1.02357	0.940353	0.986295	0.91092	1.02788	0.996805	0.992627	0.995212	0.941011	0.955424	1.04645	0.981081	0.976872	0.986393	0.973653	0.976774	1.00562	1.0203	1.01471	1.00411	0.998002
123	chr1	68517983	69051249	0.963773	1.04144	1.00511	0.992528	1.01643	0.997802	0.978436	0.970251	1.00844	1.02071	1.05369	1.00713	1.0286	0.984226	0.972777	0.948285	0.984718	0.639224	1.05075	0.970543	0.940635	0.970057	0.984423	1.04676	0.98334	1.02357	0.940353	0.986295	0.91092	1.02788	0.996805	0.992627	0.995212	0.941011	0.955424	1.04645	0.981081	0.976872	0.986393	0.973653	0.976774	1.00562	1.0203	1.01471	1.00411	0.998002
124	chr1	69051250	69658870	0.963773	1.04144	1.00511	0.992528	1.01643	0.997802	0.832185	0.970251	1.00844	1.02071	1.05369	1.00713	1.0286	0.984226	0.972777	0.948285	0.984718	0.639224	1.05075	0.970543	0.940635	0.970057	0.984423	1.04676	0.98334	1.02357	0.940353	0.986295	0.91092	1.02788	0.996805	0.992627	0.995212	0.941011	0.955424	1.04645	0.981081	0.976872	0.986393	0.973653	0.976774	1.00562	1.0203	1.01471	1.00411	0.998002
125	chr1	69658871	70267849	0.963773	1.04144	1.00511	0.992528	1.01643	0.997802	0.832185	0.970251	1.00844	1.02071	1.05369	1.00713	1.0286	0.984226	0.972777	0.948285	0.984718	0.639224	1.05075	0.970543	0.940635	0.970057	0.984423	1.04676	0.98334	1.02357	0.940353	0.986295	0.91092	1.02788	0.996805	0.992627	0.995212	0.941011	0.955424	1.04645	0.981081	0.976872	0.986393	0.973653	0.976774	1.00562	1.0203	1.01471	1.00411	0.998002
126	chr1	70267850	70848853	0.963773	1.04144	1.00511	0.992528	1.01643	0.997802	0.832185	0.970251	1.00844	1.02071	1.05369	1.00713	1.0286	0.984226	0.972777	0.948285	0.984718	0.639224	1.05075	0.970543	0.940635	0.970057	0.984423	1.04676	0.98334	1.02357	0.940353	0.986295	0.91092	1.02788	0.996805	0.992627	0.995212	0.941011	0.955424	1.04645	0.981081	0.976872	0.986393	0.973653	0.976774	1.00562	1.0203	1.01471	1.00411	0.998002
127	chr1	70848854	71446267	0.963773	1.04144	1.00511	0.992528	1.01643	0.997802	0.832185	0.970251	1.00844	1.02071	1.05369	1.00713	1.0286	0.984226	0.972777	0.948285	0.984718	0.639224	1.05075	0.970543	0.940635	0.970057	0.984423	1.04676	0.98334	1.02357	0.940353	0.986295	0.91092	1.02788	0.996805	0.992627	0.995212	0.941011	0.955424	1.04645	0.981081	0.976872	0.986393	0.973653	0.976774	1.00562	1.0203	1.01471	1.00411	0.998002
128	chr1	71446268	72018120	0.963773	1.04144	1.00511	0.992528	1.01643	0.997802	0.832185	0.970251	1.00844	1.02071	1.05369	1.00713	1.0286	0.984226	0.972777	0.948285	0.984718	0.639224	1.05075	0.970543	0.940635	0.970057	0.984423	1.04676	0.98334	1.02357	0.940353	0.986295	0.91092	1.02788	0.996805	0.992627	0.995212	0.941011	0.955424	1.04645	0.981081	0.976872	0.986393	0.973653	0.976774	1.00562	1.0203	1.01471	1.00411	0.998002
129	chr1	72018121	72631371	0.963773	1.04144	1.00511	0.992528	1.01643	0.997802	0.832185	0.970251	1.00844	1.02071	1.05369	1.00713	1.0286	0.984226	0.972777	0.948285	0.984718	0.639224	1.05075	0.970543	0.940635	0.970057	0.984423	1.04676	0.98334	1.02357	0.940353	0.986295	0.91092	1.02788	0.996805	0.992627	0.995212	0.941011	0.955424	1.04645	0.981081	0.976872	0.986393	0.973653	0.976774	1.00562	1.0203	1.01471	1.00411	0.998002
130	chr1	72631372	73266160	0.963773	1.04144	1.00511	0.992528	1.01643	0.997802	0.832185	0.970251	1.00844	1.02071	1.05369	1.00713	1.0286	0.984226	0.972777	0.948285	0.984718	0.639224	1.05075	0.970543	0.940635	0.970057	0.984423	1.04676	0.98334	1.02357	0.940353	0.986295	0.91092	1.02788	0.996805	0.992627	0.995212	0.941011	0.955424	1.04645	0.981081	0.976872	0.986393	0.973653	0.976774	1.00562	1.0203	1.01471	1.00411	0.998002
131	chr1	73266161	73881859	0.963773	1.04144	1.00511	0.992528	1.01643	0.997802	0.832185	0.970251	1.00844	1.02071	1.05369	1.00713	1.0286	0.984226	0.972777	0.948285	0.984718	0.639224	1.05075	0.970543	0.940635	0.970057	0.984423	1.04676	0.98334	1.02357	0.940353	0.986295	0.91092	1.02788	0.996805	0.992627	0.995212	0.941011	0.955424	1.04645	0.981081	0.976872	0.986393	0.973653	0.976774	1.00562	1.0203	1.01471	1.00411	0.998002
132	chr1	73881860	74499535	0.963773	1.04144	1.00511	0.992528	1.01643	0.997802	0.832185	0.970251	1.00844	1.02071	1.05369	1.00713	1.0286	0.984226	0.972777	0.948285	0.984718	0.639224	1.05075	0.970543	0.940635	0.970057	0.984423	1.04676	0.98334	1.02357	0.940353	0.986295	0.91092	1.02788	0.996805	0.992627	0.995212	0.941011	0.955424	1.04645	0.981081	1.18034	0.986393	0.973653	0.976774	1.00562	1.0203	1.01471	1.00411	0.998002
133	chr1	74499536	75105554	0.963773	1.04144	1.00511	0.992528	1.01643	0.997802	0.832185	0.970251	1.00844	1.02071	1.05369	1.00713	1.0286	0.984226	0.972777	0.948285	0.984718	0.880469	1.05075	0.970543	0.940635	0.970057	0.984423	1.04676	0.98334	1.02357	0.940353	0.986295	0.91092	1.02788	0.996805	0.992627	0.995212	0.941011	0.955424	1.04645	0.981081	1.18034	0.986393	0.973653	0.976774	1.00562	1.0203	1.01471	1.00411	0.998002
134	chr1	75105555	75698992	0.963773	1.04144	1.00511	0.992528	1.01643	0.997802	0.832185	0.970251	1.00844	1.02071	1.05369	1.00713	1.0286	0.984226	0.972777	0.948285	0.984718	0.880469	1.05075	0.970543	0.940635	0.970057	0.984423	1.04676	0.98334	1.02357	0.940353	0.986295	0.91092	1.02788	0.996805	0.992627	0.995212	0.941011	0.955424	1.04645	0.981081	1.18034	0.986393	0.973653	0.976774	1.00562	1.0203	1.01471	1.00411	0.998002
135	chr1	75698993	76329115	0.963773	1.04144	1.00511	0.992528	1.01643	0.997802	0.832185	0.970251	1.00844	1.02071	1.05369	1.00713	1.0286	0.984226	0.972777	0.948285	0.984718	0.880469	1.05075	0.970543	0.940635	0.970057	0.984423	1.04676	0.98334	1.02357	0.940353	0.986295	0.91092	1.02788	0.996805	0.992627	0.995212	0.941011	0.955424	1.04645	0.981081	1.18034	0.986393	0.973653	0.976774	1.00562	1.0203	1.01471	1.00411	0.998002
136	chr1	76329116	76902390	0.963773	1.04144	1.00511	0.992528	1.01643	0.997802	0.832185	0.970251	1.00844	1.02071	1.05369	1.00713	1.0286	0.984226	0.972777	0.948285	0.984718	0.880469	1.05075	0.970543	0.940635	0.970057	0.984423	1.04676	0.98334	1.02357	0.940353	0.986295	0.91092	1.02788	0.996805	0.992627	0.995212	0.941011	0.955424	1.04645	0.981081	1.18034	0.986393	0.973653	0.976774	1.00562	1.0203	1.01471	1.00411	0.998002
137	chr1	76902391	77452830	0.963773	1.04144	1.00511	0.992528	1.01643	0.997802	0.832185	0.970251	1.00844	1.02071	1.05369	1.00713	1.0286	0.984226	0.972777	0.948285	0.984718	0.880469	1.05075	0.970543	0.940635	0.970057	0.984423	1.04676	0.98334	1.02357	0.940353	0.986295	0.91092	1.02788	0.996805	0.992627	0.995212	0.941011	0.955424	1.04645	0.981081	1.18034	0.986393	0.973653	0.976774	1.00562	1.0203	1.01471	1.00411	0.998002
138	chr1	77452831	78025527	0.963773	1.04144	1.00511	0.992528	1.01643	0.997802	0.832185	0.970251	1.00844	1.02071	1.05369	1.00713	1.0286	0.984226	0.972777	0.948285	0.984718	0.880469	1.05075	0.970543	0.940635	0.970057	0.984423	1.04676	0.98334	1.02357	0.940353	0.986295	0.91092	1.02788	0.996805	0.992627	0.995212	0.941011	0.955424	1.04645	0.981081	1.18034	0.986393	0.973653	0.976774	1.00562	1.0203	1.01471	1.00411	0.998002
139	chr1	78025528	78618126	0.963773	1.04144	1.00511	0.992528	1.01643	0.997802	0.832185	0.970251	1.00844	1.02071	1.05369	1.00713	1.0286	0.984226	0.972777	0.948285	0.984718	0.880469	1.05075	0.970543	0.940635	0.970057	0.984423	1.04676	0.98334	1.02357	0.940353	0.986295	0.91092	1.02788	0.996805	0.992627	0.995212	0.941011	0.955424	1.04645	0.981081	1.18034	0.986393	0.973653	0.976774	1.00562	1.0203	1.01471	1.00411	0.998002
140	chr1	78618127	79187317	0.963773	1.04144	1.00511	0.992528	1.01643	0.997802	0.832185	0.970251	1.00844	1.02071	1.05369	1.00713	1.0286	0.984226	0.972777	0.948285	0.984718	0.880469	1.05075	0.970543	0.940635	0.970057	0.984423	1.04676	0.98334	1.02357	0.940353	0.986295	0.91092	1.02788	0.996805	0.992627	0.995212	0.941011	0.955424	1.04645	0.981081	1.18034	0.986393	0.973653	0.976774	1.00562	1.0203	1.01471	1.00411	0.998002
141	chr1	79187318	79785984	0.963773	1.04144	1.00511	0.992528	1.01643	0.997802	0.832185	0.970251	1.00844	1.02071	1.05369	1.00713	1.0286	0.984226	0.972777	0.948285	0.984718	0.880469	1.05075	0.970543	0.940635	0.970057	0.984423	1.04676	0.98334	1.02357	0.940353	0.986295	0.91092	1.02788	0.996805	0.992627	0.995212	0.941011	0.955424	1.04645	0.981081	1.18034	0.986393	0.973653	0.976774	1.00562	1.0203	1.01471	1.00411	0.998002
142	chr1	79785985	80402697	0.963773	1.04144	1.00511	0.992528	1.01643	0.997802	0.832185	0.970251	1.00844	1.02071	1.05369	1.00713	1.0286	0.984226	0.972777	0.948285	0.984718	0.880469	1.05075	0.970543	0.940635	0.970057	0.984423	1.04676	0.98334	1.02357	0.940353	0.986295	0.91092	1.02788	0.996805	0.992627	0.995212	0.941011	0.955424	1.04645	0.981081	1.18034	0.986393	0.973653	0.976774	1.00562	1.0203	1.01471	1.00411	0.998002
143	chr1	80402698	81035618	0.963773	1.04144	1.00511	0.992528	1.01643	0.997802	0.832185	0.970251	1.00844	1.02071	1.05369	1.00713	1.0286	0.984226	0.972777	0.948285	0.984718	0.880469	1.05075	0.970543	0.940635	0.970057	0.984423	1.04676	0.98334	1.02357	0.940353	0.986295	0.91092	1.02788	0.996805	0.992627	0.995212	0.941011	0.955424	1.04645	0.981081	1.18034	0.986393	0.973653	0.976774	1.00562	1.0203	1.01471	1.00411	0.998002
144	chr1	81035619	81634233	0.963773	1.04144	1.00511	0.992528	1.01643	0.997802	0.832185	0.970251	1.00844	1.02071	1.05369	1.00713	1.0286	0.984226	0.972777	0.948285	0.984718	0.880469	1.05075	0.970543	0.940635	0.970057	0.984423	1.04676	0.98334	1.02357	0.940353	0.986295	0.91092	1.02788	0.996805	0.992627	0.995212	0.941011	0.955424	1.04645	0.981081	1.18034	0.986393	0.973653	0.976774	1.00562	1.0203	1.01471	1.00411	0.998002
145	chr1	81634234	82189465	0.963773	1.04144	1.00511	0.992528	1.01643	0.997802	0.832185	0.970251	1.00844	1.02071	1.05369	1.00713	1.0286	0.984226	0.972777	0.948285	0.984718	0.880469	1.05075	0.970543	0.940635	0.970057	0.984423	1.04676	0.98334	1.02357	0.940353	0.986295	0.91092	1.02788	0.996805	0.992627	0.995212	0.941011	0.955424	1.04645	0.981081	1.18034	0.986393	0.973653	0.976774	1.00562	1.0203	1.01471	1.00411	0.998002
146	chr1	82189466	82759702	0.963773	1.04144	1.00511	0.992528	1.01643	0.997802	0.832185	0.970251	1.00844	1.02071	1.05369	1.00713	1.0286	0.984226	0.972777	0.948285	0.984718	0.880469	1.05075	0.970543	0.940635	0.970057	0.984423	1.04676	0.98334	1.02357	0.940353	0.986295	0.91092	1.02788	0.996805	0.992627	0.995212	0.941011	0.955424	1.04645	0.981081	1.18034	0.986393	0.973653	0.976774	1.00562	1.0203	1.01471	1.00411	0.998002
147	chr1	82759703	83348091	0.963773	1.04144	1.00511	0.992528	1.01643	0.997802	0.832185	0.970251	1.00844	1.02071	1.05369	1.00713	1.0286	0.984226	0.972777	0.948285	0.984718	0.880469	1.05075	0.970543	0.940635	0.970057	0.984423	1.04676	0.98334	1.02357	0.940353	0.986295	0.91092	1.02788	0.996805	0.992627	0.995212	0.941011	0.955424	1.04645	0.981081	1.18034	0.986393	0.973653	0.976774	1.00562	1.0203	1.01471	1.00411	0.998002
148	chr1	83348092	83931134	0.963773	1.04144	1.00511	0.992528	1.01643	0.997802	0.832185	0.970251	1.00844	1.02071	1.05369	1.00713	1.0286	0.984226	0.972777	0.948285	0.984718	0.880469	1.05075	0.970543	0.940635	0.970057	0.984423	1.04676	0.98334	1.02357	0.940353	0.986295	0.91092	1.02788	0.996805	0.992627	0.995212	0.941011	0.955424	1.04645	0.981081	1.18034	0.986393	0.973653	0.976774	1.00562	1.0203	1.01471	1.00411	0.998002
149	chr1	83931135	84492952	0.963773	1.04144	1.00511	0.992528	1.01643	0.997802	0.832185	0.970251	1.00844	1.02071	1.05369	1.00713	1.0286	0.984226	0.972777	0.948285	0.984718	0.880469	1.05075	0.970543	0.940635	0.970057	0.984423	1.04676	0.98334	1.02357	0.940353	0.986295	0.91092	1.02788	0.996805	0.992627	0.995212	0.941011	0.955424	1.04645	0.981081	1.18034	0.986393	0.973653	0.976774	1.00562	1.0203	1.01471	1.00411	0.998002
150	chr1	84492953	85068893	0.963773	1.04144	1.00511	0.992528	1.01643	0.997802	0.832185	0.970251	1.00844	1.02071	1.05369	1.00713	1.0286	0.984226	0.972777	0.948285	0.984718	0.880469	1.05075	0.970543	0.940635	0.970057	0.984423	1.04676	0.98334	1.02357	0.940353	0.986295	0.91092	1.02788	0.996805	0.992627	0.995212	0.941011	0.955424	1.04645	0.981081	1.18034	0.986393	0.973653	0.976774	1.00562	1.0203	1.01471	1.00411	0.998002
151	chr1	85068894	85575571	0.963773	1.04144	1.00511	0.992528	1.01643	0.997802	0.832185	0.970251	1.00844	1.02071	1.05369	1.00713	1.0286	0.984226	0.972777	0.948285	0.984718	0.880469	1.05075	0.970543	0.940635	0.970057	0.984423	1.04676	0.98334	1.02357	0.940353	0.986295	0.91092	1.02788	0.996805	0.992627	0.995212	0.941011	0.955424	1.04645	0.981081	1.18034	0.986393	0.973653	0.976774	1.00562	1.0203	1.01471	1.00411	0.998002
152	chr1	85575572	86113236	0.963773	1.04144	1.00511	0.992528	1.01643	0.997802	0.832185	0.970251	1.00844	1.02071	1.05369	1.00713	1.0286	0.984226	0.972777	0.948285	0.984718	0.880469	1.05075	0.970543	0.940635	0.970057	0.984423	1.04676	0.98334	1.02357	0.940353	0.986295	0.91092	1.02788	0.996805	0.992627	0.995212	0.941011	0.955424	1.04645	0.981081	1.18034	0.986393	0.973653	0.976774	1.00562	1.0203	1.01471	1.00411	0.998002
153	chr1	86113237	86756515	0.963773	1.04144	1.00511	0.992528	1.01643	0.997802	0.832185	0.970251	1.00844	1.02071	1.05369	1.00713	1.0286	0.984226	0.972777	0.948285	0.984718	0.880469	1.05075	0.970543	0.940635	0.970057	0.984423	1.04676	0.98334	1.02357	0.940353	0.986295	0.91092	1.02788	0.996805	0.992627	0.995212	0.941011	0.955424	1.04645	0.981081	1.18034	0.986393	0.973653	0.976774	1.00562	1.0203	1.01471	1.00411	0.998002
154	chr1	86756516	87329744	0.963773	1.04144	1.00511	0.992528	1.01643	0.997802	0.832185	0.970251	1.00844	1.02071	1.05369	1.00713	1.0286	0.984226	0.972777	0.948285	0.984718	0.880469	1.05075	0.970543	0.940635	0.970057	0.984423	1.04676	0.98334	1.02357	0.940353	0.986295	0.91092	1.02788	0.996805	0.992627	0.995212	0.941011	0.955424	1.04645	0.981081	1.18034	0.986393	0.973653	0.976774	1.00562	1.0203	1.01471	1.00411	0.998002
155	chr1	87329745	87863669	0.963773	1.04144	1.00511	0.992528	1.01643	0.997802	0.832185	0.970251	1.00844	1.02071	1.05369	1.00713	1.0286	0.984226	0.972777	0.948285	0.984718	0.880469	1.05075	0.970543	0.940635	0.970057	0.984423	1.04676	0.98334	1.02357	0.940353	0.986295	0.91092	1.02788	0.996805	0.992627	0.995212	0.941011	0.955424	1.04645	0.981081	1.18034	0.986393	0.973653	0.976774	1.00562	1.0203	1.01471	1.00411	0.998002
156	chr1	87863670	88403598	0.963773	1.04144	1.00511	0.992528	1.01643	0.997802	0.832185	0.970251	1.00844	1.02071	1.05369	1.00713	1.0286	0.984226	0.972777	0.948285	0.984718	0.880469	1.05075	0.970543	0.940635	0.970057	0.984423	1.04676	0.98334	1.02357	0.940353	0.986295	0.91092	1.02788	0.996805	0.992627	0.995212	0.941011	0.955424	1.04645	0.981081	1.18034	0.986393	0.973653	0.976774	1.00562	1.0203	1.01471	1.00411	0.998002
157	chr1	88403599	88997463	0.963773	1.04144	1.00511	0.992528	1.01643	0.997802	0.832185	0.970251	1.00844	1.02071	1.05369	1.00713	1.0286	0.984226	0.972777	0.948285	0.984718	0.880469	1.05075	0.970543	0.940635	0.970057	0.984423	1.04676	0.98334	1.02357	0.940353	0.986295	0.91092	1.02788	0.996805	0.992627	0.995212	0.941011	0.955424	1.04645	0.981081	1.18034	0.986393	0.973653	0.976774	1.00562	1.0203	1.01471	1.00411	0.998002
158	chr1	88997464	89587170	0.963773	1.04144	1.00511	0.992528	1.01643	0.997802	0.832185	0.970251	1.00844	1.02071	1.05369	1.00713	1.0286	0.984226	0.972777	0.948285	0.984718	0.880469	1.05075	0.970543	0.940635	0.970057	0.984423	1.04676	0.98334	1.02357	0.940353	0.986295	0.91092	1.02788	0.996805	0.992627	0.995212	0.941011	0.955424	1.04645	0.981081	1.18034	0.986393	0.973653	0.976774	1.00562	1.0203	1.01471	1.00411	0.998002
159	chr1	89587171	90175994	0.963773	1.04144	1.00511	0.992528	1.01643	0.997802	0.832185	0.970251	1.00844	1.02071	1.05369	1.00713	1.0286	0.984226	0.972777	0.948285	0.984718	0.880469	1.05075	0.970543	0.940635	0.970057	0.984423	1.04676	0.98334	1.02357	0.940353	0.986295	0.91092	1.02788	0.996805	0.992627	0.995212	0.941011	0.955424	1.04645	0.981081	1.18034	0.986393	0.973653	0.976774	1.00562	1.0203	1.01471	1.00411	0.998002
160	chr1	90175995	90739605	0.963773	1.04144	1.00511	0.992528	1.01643	0.997802	0.832185	0.970251	1.00844	1.02071	1.05369	1.00713	1.0286	0.984226	0.972777	0.948285	0.984718	0.880469	1.05075	0.970543	0.940635	0.970057	0.984423	1.04676	0.98334	1.02357	0.940353	0.986295	0.91092	1.02788	0.996805	0.992627	0.995212	0.941011	0.955424	1.04645	0.981081	1.18034	0.986393	0.973653	0.976774	1.00562	1.0203	1.01471	1.00411	0.998002
161	chr1	90739606	91304174	0.963773	1.04144	1.00511	0.992528	1.01643	0.997802	0.832185	0.970251	1.00844	1.02071	1.05369	1.00713	1.0286	0.984226	0.972777	0.948285	0.984718	0.880469	1.05075	0.970543	0.940635	0.970057	0.984423	1.04676	0.98334	1.02357	0.940353	0.986295	0.91092	1.02788	0.996805	0.992627	0.995212	0.941011	0.955424	1.04645	0.981081	1.18034	0.986393	0.973653	0.976774	1.00562	1.0203	1.01471	1.00411	0.998002
162	chr1	91304175	91928904	0.963773	1.04144	1.00511	0.992528	1.01643	0.997802	0.832185	0.970251	1.00844	1.02071	1.05369	1.00713	1.0286	0.984226	0.972777	0.948285	0.984718	0.880469	1.05075	0.970543	0.940635	0.970057	0.984423	1.04676	0.98334	1.02357	0.940353	0.986295	0.91092	1.02788	0.996805	0.992627	0.995212	0.941011	0.955424	1.04645	0.981081	1.18034	0.986393	0.973653	0.976774	1.00562	1.0203	1.01471	1.00411	0.998002
163	chr1	91928905	92489562	0.963773	1.04144	1.00511	0.992528	1.01643	0.997802	0.832185	0.970251	1.00844	1.02071	1.05369	1.00713	1.0286	0.984226	0.972777	0.948285	0.984718	0.880469	1.05075	0.970543	0.940635	0.970057	0.984423	1.04676	0.98334	1.02357	0.940353	0.986295	0.91092	1.02788	0.996805	0.992627	0.995212	0.941011	0.955424	1.04645	0.981081	1.18034	0.986393	0.973653	0.976774	1.00562	1.0203	1.01471	1.00411	0.998002
164	chr1	92489563	93096618	0.963773	1.04144	1.00511	0.992528	1.01643	0.997802	0.832185	0.970251	1.00844	1.02071	1.05369	1.00713	1.0286	0.984226	0.972777	0.948285	0.984718	0.880469	1.05075	0.970543	0.940635	0.970057	0.984423	1.04676	0.98334	1.02357	0.940353	0.986295	0.91092	1.02788	0.996805	0.992627	0.995212	0.941011	0.955424	1.04645	0.981081	1.18034	0.986393	0.973653	0.976774	1.00562	1.0203	1.01471	1.00411	0.998002
165	chr1	93096619	93717745	0.963773	1.04144	1.00511	0.992528	1.01643	0.997802	0.832185	0.970251	1.00844	1.02071	1.05369	1.00713	1.0286	0.984226	0.972777	0.948285	0.984718	0.880469	1.05075	0.970543	0.940635	0.970057	0.984423	1.04676	0.98334	1.02357	0.940353	0.986295	0.91092	1.02788	0.996805	0.992627	0.995212	0.941011	0.955424	1.04645	0.981081	1.18034	0.986393	0.973653	0.976774	1.00562	1.0203	1.01471	1.00411	0.998002
166	chr1	93717746	94263259	0.963773	1.04144	1.00511	0.992528	1.01643	0.997802	0.832185	0.970251	1.00844	1.02071	1.05369	1.00713	1.0286	0.984226	0.972777	0.948285	0.984718	0.880469	1.05075	0.970543	0.940635	0.970057	0.984423	1.04676	0.98334	1.02357	0.940353	0.986295	0.91092	1.02788	0.996805	0.992627	0.995212	0.941011	0.955424	1.04645	0.981081	1.18034	0.986393	0.973653	0.976774	1.00562	1.0203	1.01471	1.00411	0.998002
167	chr1	94263260	94793621	0.963773	1.04144	1.00511	0.992528	1.01643	0.997802	0.832185	0.970251	1.00844	1.02071	1.05369	1.00713	1.0286	0.984226	0.972777	0.948285	0.984718	0.880469	1.05075	0.970543	0.940635	0.970057	0.984423	1.04676	0.98334	1.02357	0.940353	0.986295	0.91092	1.02788	0.996805	0.992627	0.995212	0.941011	0.955424	1.04645	0.981081	1.18034	0.986393	0.973653	0.976774	1.00562	1.0203	1.01471	1.00411	0.998002
168	chr1	94793622	95321451	0.963773	1.04144	1.00511	0.992528	1.01643	0.997802	0.832185	0.970251	1.00844	1.02071	1.05369	1.00713	1.0286	0.984226	0.972777	0.948285	0.984718	0.880469	1.05075	0.970543	0.940635	0.970057	0.984423	1.04676	0.98334	1.02357	0.940353	0.986295	0.91092	1.02788	0.996805	0.992627	0.995212	0.941011	0.955424	1.04645	0.981081	1.18034	0.986393	0.973653	0.976774	1.00562	1.0203	1.01471	1.00411	0.998002
169	chr1	95321452	95886048	0.963773	1.04144	1.00511	0.992528	1.01643	0.997802	0.832185	0.970251	1.00844	1.02071	1.05369	1.00713	1.0286	0.984226	0.972777	0.948285	0.984718	0.880469	1.05075	0.970543	0.940635	0.970057	0.984423	1.04676	0.98334	1.02357	0.940353	0.986295	0.91092	1.02788	0.996805	0.992627	0.995212	0.941011	0.955424	1.04645	0.981081	1.18034	0.986393	0.973653	0.976774	1.00562	1.0203	1.01471	1.00411	0.998002
170	chr1	95886049	96451312	0.963773	1.04144	1.00511	0.992528	1.01643	0.997802	0.832185	0.970251	1.00844	1.02071	1.05369	1.00713	1.0286	0.984226	0.972777	0.948285	0.984718	0.880469	1.05075	0.970543	0.940635	0.970057	0.984423	1.04676	0.98334	1.02357	0.940353	0.986295	0.91092	1.02788	0.996805	0.992627	0.995212	0.941011	0.955424	1.04645	0.981081	1.18034	0.986393	0.973653	0.976774	1.00562	1.0203	1.01471	1.00411	0.998002
171	chr1	96451313	97009109	0.963773	1.04144	1.00511	0.992528	1.01643	0.997802	0.832185	0.970251	1.00844	1.02071	1.05369	1.00713	1.0286	0.984226	0.972777	0.948285	0.984718	0.880469	1.05075	0.970543	0.940635	0.970057	0.984423	1.04676	0.98334	1.02357	0.940353	0.986295	0.91092	1.02788	0.996805	0.992627	0.995212	0.941011	0.955424	1.04645	0.981081	1.18034	0.986393	0.973653	0.976774	1.00562	1.0203	1.01471	1.00411	0.998002
172	chr1	97009110	97593588	0.963773	1.04144	1.00511	0.992528	1.01643	0.997802	0.832185	0.970251	1.00844	1.02071	1.05369	1.00713	1.0286	0.984226	0.972777	0.948285	0.984718	0.880469	1.05075	0.970543	0.940635	0.970057	0.984423	1.04676	0.98334	1.02357	0.940353	0.986295	0.91092	1.02788	0.996805	0.992627	0.995212	0.941011	0.955424	1.04645	0.981081	1.18034	0.986393	0.973653	0.976774	1.00562	1.0203	1.01471	1.00411	0.998002
173	chr1	97593589	98180882	0.963773	1.04144	1.00511	0.992528	1.01643	0.997802	0.832185	0.970251	1.00844	1.02071	1.05369	1.00713	1.0286	0.984226	0.972777	0.948285	0.984718	0.880469	1.05075	0.970543	0.940635	0.970057	0.984423	1.04676	0.98334	1.02357	0.940353	0.986295	0.91092	1.02788	0.996805	0.992627	0.995212	0.941011	0.955424	1.04645	0.981081	1.18034	0.986393	0.973653	0.976774	1.00562	1.0203	1.01471	1.00411	0.998002
174	chr1	98180883	98757962	0.963773	1.04144	1.00511	0.992528	1.01643	0.997802	0.832185	0.970251	1.00844	1.02071	1.05369	1.00713	1.0286	0.984226	0.972777	0.948285	0.984718	0.880469	1.05075	0.970543	0.940635	0.970057	0.984423	1.04676	0.98334	1.02357	0.940353	0.986295	0.91092	1.02788	0.996805	0.992627	0.995212	0.941011	0.955424	1.04645	0.981081	1.18034	0.986393	0.973653	0.976774	1.00562	1.0203	1.01471	1.00411	0.998002
175	chr1	98757963	99357509	0.963773	1.04144	1.00511	0.992528	1.01643	0.997802	0.832185	0.970251	1.00844	1.02071	1.05369	1.00713	1.0286	0.984226	0.972777	0.948285	0.984718	0.880469	1.05075	0.970543	0.940635	0.970057	0.984423	1.04676	0.98334	1.02357	0.940353	0.986295	0.91092	1.02788	0.996805	0.992627	0.995212	0.941011	0.955424	1.04645	0.981081	1.18034	0.986393	0.973653	0.976774	1.00562	1.0203	1.01471	1.00411	0.998002
176	chr1	99357510	99963471	0.963773	1.04144	1.00511	0.992528	1.01643	0.997802	0.832185	0.970251	1.00844	1.02071	1.05369	1.00713	1.0286	0.984226	0.972777	0.948285	0.984718	0.880469	1.05075	0.970543	0.940635	0.970057	0.984423	1.04676	0.98334	1.02357	0.940353	0.986295	0.91092	1.02788	0.996805	0.992627	0.995212	0.941011	0.955424	1.04645	0.981081	1.18034	0.986393	0.973653	0.976774	1.00562	1.0203	1.01471	1.00411	0.998002
177	chr1	99963472	100556373	0.963773	1.04144	1.00511	0.992528	1.01643	0.997802	0.832185	0.970251	1.00844	1.02071	1.05369	1.00713	1.0286	0.984226	0.972777	0.948285	0.984718	0.880469	1.05075	0.970543	0.940635	0.970057	0.984423	1.04676	0.98334	1.02357	0.940353	0.986295	0.91092	1.02788	0.996805	0.992627	0.995212	0.941011	0.955424	1.04645	0.981081	1.18034	0.986393	0.973653	0.976774	1.00562	1.0203	1.01471	1.00411	0.998002
178	chr1	100556374	101126693	0.963773	1.04144	1.00511	0.992528	1.01643	0.997802	0.832185	0.970251	1.00844	1.02071	1.05369	1.00713	1.0286	0.984226	0.972777	0.948285	0.984718	0.880469	1.05075	0.970543	0.940635	0.970057	0.984423	1.04676	0.98334	1.02357	0.940353	0.986295	0.91092	1.02788	0.996805	0.992627	0.995212	0.941011	0.955424	1.04645	0.981081	1.18034	0.986393	0.973653	0.976774	1.00562	1.0203	1.01471	1.00411	0.998002
179	chr1	101126694	101706024	0.963773	1.04144	1.00511	0.992528	1.01643	0.997802	0.832185	0.970251	1.00844	1.02071	1.05369	1.00713	1.0286	0.984226	0.972777	0.948285	0.984718	0.880469	1.05075	0.970543	0.940635	0.970057	0.984423	1.04676	0.98334	1.02357	0.940353	0.986295	0.91092	1.02788	0.996805	0.992627	0.995212	0.941011	0.955424	1.04645	0.981081	1.18034	0.986393	0.973653	0.976774	1.00562	1.0203	1.01471	1.00411	0.998002
180	chr1	101706025	102292187	0.963773	1.04144	1.00511	0.992528	1.01643	0.997802	0.832185	0.970251	1.00844	1.02071	1.05369	1.00713	1.0286	0.984226	0.972777	0.948285	0.984718	0.880469	1.05075	0.970543	0.940635	0.970057	0.984423	1.04676	0.98334	1.02357	0.940353	0.986295	0.91092	1.02788	0.996805	0.992627	0.995212	0.941011	0.955424	1.04645	0.981081	1.18034	0.986393	0.973653	0.976774	1.00562	1.0203	1.01471	1.00411	0.998002
181	chr1	102292188	102947726	0.963773	1.04144	1.00511	0.992528	1.01643	0.997802	0.832185	0.970251	1.00844	1.02071	1.05369	1.00713	1.0286	0.984226	0.972777	0.948285	0.984718	0.880469	1.05075	0.970543	0.940635	0.970057	0.984423	1.04676	0.98334	1.02357	0.940353	0.986295	0.91092	1.02788	0.996805	0.992627	0.995212	0.941011	0.955424	1.04645	0.981081	1.18034	0.986393	0.973653	0.976774	1.00562	1.0203	1.01471	1.00411	0.998002
182	chr1	102947727	103611327	0.963773	1.04144	1.00511	0.992528	1.01643	0.997802	0.832185	0.970251	1.00844	1.02071	1.05369	1.00713	1.0286	0.984226	0.972777	0.948285	0.984718	0.880469	1.05075	0.970543	0.940635	0.970057	0.984423	1.04676	0.98334	1.02357	0.940353	0.986295	0.91092	1.02788	0.996805	0.992627	0.995212	0.941011	0.955424	1.04645	0.981081	1.18034	0.986393	0.973653	0.976774	1.00562	1.0203	1.01471	1.00411	0.998002
183	chr1	103611328	104325394	0.963773	1.04144	1.00511	0.992528	1.01643	0.997802	0.832185	0.970251	1.00844	1.02071	1.05369	1.00713	1.0286	0.984226	0.972777	0.948285	0.984718	0.880469	1.05075	0.970543	0.940635	0.970057	0.984423	1.04676	0.98334	1.02357	0.940353	0.986295	0.91092	1.02788	0.996805	0.992627	0.995212	0.941011	0.955424	1.04645	0.981081	1.18034	0.986393	0.973653	0.976774	1.00562	1.0203	1.01471	1.00411	0.998002
184	chr1	104325395	104973153	0.963773	1.04144	1.00511	0.992528	1.01643	0.997802	0.832185	0.970251	1.00844	1.02071	1.05369	1.00713	1.0286	0.984226	0.972777	0.948285	0.984718	0.880469	1.05075	0.970543	0.940635	0.970057	0.984423	1.04676	0.98334	1.02357	0.940353	0.986295	0.91092	1.02788	0.996805	0.992627	0.995212	0.941011	0.955424	1.04645	0.981081	1.18034	0.986393	0.973653	0.976774	1.00562	1.0203	1.01471	1.00411	0.998002
185	chr1	104973154	105631925	0.963773	1.04144	1.00511	0.992528	1.01643	0.997802	0.832185	0.970251	1.00844	1.02071	1.05369	1.00713	1.0286	0.984226	0.972777	0.948285	0.984718	0.880469	1.05075	0.970543	0.940635	0.970057	0.984423	1.04676	0.98334	1.02357	0.940353	0.986295	0.91092	1.02788	0.996805	0.992627	0.995212	0.941011	0.955424	1.04645	0.981081	1.18034	0.986393	0.973653	0.976774	1.00562	1.0203	1.01471	1.00411	0.998002
186	chr1	105631926	106303824	0.963773	1.04144	1.00511	0.992528	1.01643	0.997802	0.832185	0.970251	1.00844	1.02071	1.05369	1.00713	1.0286	0.984226	0.972777	0.948285	0.984718	0.880469	1.05075	0.970543	0.940635	0.970057	0.984423	1.04676	0.98334	1.02357	0.940353	0.986295	0.91092	1.02788	0.996805	0.992627	0.995212	0.941011	0.955424	1.04645	0.981081	1.18034	0.986393	0.973653	0.976774	1.00562	1.0203	1.01471	1.00411	0.998002
187	chr1	106303825	106953753	0.963773	1.04144	1.00511	0.992528	1.01643	0.997802	0.832185	0.970251	1.00844	1.02071	1.05369	1.00713	1.0286	0.984226	0.972777	0.948285	0.984718	0.880469	1.05075	0.970543	0.940635	0.970057	0.984423	1.04676	0.98334	1.02357	0.940353	0.986295	0.91092	1.02788	0.996805	0.992627	0.995212	0.941011	0.955424	1.04645	0.981081	1.18034	0.986393	0.973653	0.976774	1.00562	1.0203	1.01471	1.00411	0.998002
188	chr1	106953754	107568215	0.963773	1.04144	1.00511	0.992528	1.01643	0.997802	0.832185	0.970251	1.00844	1.02071	1.05369	1.00713	1.0286	0.984226	0.972777	0.948285	0.984718	0.880469	1.05075	0.970543	0.940635	0.970057	0.984423	1.04676	0.98334	1.02357	0.940353	0.986295	0.91092	1.02788	0.996805	0.992627	0.995212	0.941011	0.955424	1.04645	0.981081	1.18034	0.986393	0.973653	0.976774	1.00562	1.0203	1.01471	1.00411	0.998002
189	chr1	107568216	108137596	0.963773	1.04144	1.00511	0.992528	1.01643	0.997802	0.832185	0.970251	1.00844	1.02071	1.05369	1.00713	1.0286	0.984226	0.972777	0.948285	0.984718	0.880469	1.05075	0.970543	0.940635	0.970057	0.984423	1.04676	0.98334	1.02357	0.940353	0.986295	0.91092	1.02788	0.996805	0.992627	0.995212	0.941011	0.955424	1.04645	0.981081	1.18034	0.986393	0.973653	0.976774	1.00562	1.0203	1.01471	1.00411	0.998002
190	chr1	108137597	108737609	0.963773	1.04144	1.00511	0.992528	1.01643	0.997802	0.832185	0.970251	1.00844	1.02071	1.05369	1.00713	1.0286	0.984226	0.972777	0.948285	0.984718	0.880469	1.05075	0.970543	0.940635	0.970057	0.984423	1.04676	0.98334	1.02357	0.940353	0.986295	0.91092	1.02788	0.996805	0.992627	0.995212	0.941011	0.955424	1.04645	0.981081	1.18034	0.986393	0.973653	0.976774	1.00562	1.0203	1.01471	1.00411	0.998002
191	chr1	108737610	109217011	0.963773	1.04144	1.00511	0.992528	1.01643	0.997802	0.832185	0.970251	1.00844	1.02071	1.05369	1.00713	1.0286	0.984226	0.972777	0.948285	0.984718	0.880469	1.05075	0.970543	0.940635	0.970057	0.984423	1.04676	0.98334	1.02357	0.940353	0.986295	0.91092	1.02788	0.996805	0.992627	0.995212	0.941011	0.955424	1.04645	0.981081	1.18034	0.986393	0.973653	0.976774	1.00562	1.0203	1.01471	1.00411	0.998002
192	chr1	109217012	109792864	0.963773	1.04144	1.00511	0.992528	1.01643	0.997802	0.832185	0.970251	1.00844	1.02071	1.05369	1.00713	1.0286	0.984226	0.972777	0.948285	0.984718	0.880469	1.05075	0.970543	0.940635	0.970057	0.984423	1.04676	0.98334	1.02357	0.940353	0.986295	0.91092	1.02788	0.996805	0.992627	0.995212	0.941011	0.955424	1.04645	0.981081	1.18034	0.986393	0.973653	0.976774	1.00562	1.0203	1.01471	1.00411	0.998002
193	chr1	109792865	110307274	0.963773	1.04144	1.00511	0.992528	1.01643	0.997802	0.832185	0.970251	1.00844	1.02071	1.05369	1.00713	1.0286	0.984226	0.972777	0.948285	0.984718	0.880469	1.05075	0.970543	0.940635	0.970057	0.984423	1.04676	0.98334	1.02357	0.940353	0.986295	0.91092	1.02788	0.996805	0.992627	0.995212	0.941011	0.955424	1.04645	0.981081	1.18034	0.986393	0.973653	0.976774	1.00562	1.0203	1.01471	1.00411	0.998002
194	chr1	110307275	110817585	0.963773	1.04144	1.00511	0.992528	1.01643	0.997802	0.832185	0.970251	1.00844	1.02071	1.05369	1.00713	1.0286	0.984226	0.972777	0.948285	0.984718	0.880469	1.05075	0.970543	0.940635	0.970057	0.984423	1.04676	0.98334	1.02357	0.940353	0.986295	0.91092	1.02788	0.996805	0.992627	0.995212	0.941011	0.955424	1.04645	0.981081	1.18034	0.986393	0.973653	0.976774	1.00562	1.0203	1.01471	1.00411	0.998002
195	chr1	110817586	111353974	0.963773	1.04144	1.00511	0.992528	1.01643	0.997802	0.832185	0.970251	1.00844	1.02071	1.05369	1.00713	1.0286	0.984226	0.972777	0.948285	0.984718	0.880469	1.05075	0.970543	0.940635	0.970057	0.984423	1.04676	0.98334	1.02357	0.940353	0.986295	0.91092	1.02788	0.996805	0.992627	0.995212	0.941011	0.955424	1.04645	0.981081	1.18034	0.986393	0.973653	0.976774	1.00562	1.0203	1.01471	1.00411	0.998002
196	chr1	111353975	111935225	0.963773	1.04144	1.00511	0.992528	1.01643	0.997802	0.832185	0.970251	1.00844	1.02071	1.05369	1.00713	1.0286	0.984226	0.972777	0.948285	0.984718	0.880469	1.05075	0.970543	0.940635	0.970057	0.984423	1.04676	0.98334	1.02357	0.940353	0.986295	0.91092	1.02788	0.996805	0.992627	0.995212	0.941011	0.955424	1.04645	0.981081	1.18034	0.986393	0.973653	0.976774	1.00562	1.0203	1.01471	1.00411	0.998002
197	chr1	111935226	112464826	0.963773	1.04144	1.00511	0.992528	1.01643	0.997802	0.832185	0.970251	1.00844	1.02071	1.05369	1.00713	1.0286	0.984226	0.972777	0.948285	0.984718	0.880469	1.05075	0.970543	0.940635	0.970057	0.984423	1.04676	0.98334	1.02357	0.940353	0.986295	0.91092	1.02788	0.996805	0.992627	0.995212	0.941011	0.955424	1.04645	0.981081	1.18034	0.986393	0.973653	0.976774	1.00562	1.0203	1.01471	1.00411	0.998002
198	chr1	112464827	113023071	0.963773	1.04144	1.00511	0.992528	1.01643	0.997802	0.832185	0.970251	1.00844	1.02071	1.05369	1.00713	1.0286	0.984226	0.972777	0.948285	0.984718	0.880469	1.05075	0.970543	0.940635	0.970057	0.984423	1.04676	0.98334	1.02357	0.940353	0.986295	0.91092	1.02788	0.996805	0.992627	0.995212	0.941011	0.955424	1.04645	0.981081	1.18034	0.986393	0.973653	0.976774	1.00562	1.0203	1.01471	1.00411	0.998002
199	chr1	113023072	113601014	0.963773	1.04144	1.00511	0.992528	1.01643	0.997802	0.832185	0.970251	1.00844	1.02071	1.05369	1.00713	1.0286	0.984226	0.972777	0.948285	0.984718	0.880469	1.05075	0.970543	0.940635	0.970057	0.984423	1.04676	0.98334	1.02357	0.940353	0.986295	0.91092	1.02788	0.996805	0.992627	0.995212	0.941011	0.955424	1.04645	0.981081	1.18034	0.986393	0.973653	0.976774	1.00562	1.0203	1.01471	1.00411	0.998002
200	chr1	113601015	114190159	0.963773	1.04144	1.00511	0.992528	1.01643	0.997802	0.832185	0.970251	1.00844	1.02071	1.05369	1.00713	1.0286	0.984226	0.972777	0.948285	0.984718	0.880469	1.05075	0.970543	0.940635	0.970057	0.984423	1.04676	0.98334	1.02357	0.940353	0.986295	0.91092	1.02788	0.996805	0.992627	0.995212	0.941011	0.955424	1.04645	0.981081	1.18034	0.986393	0.973653	0.976774	1.00562	1.0203	1.01471	1.00411	0.998002
201	chr1	114190160	114724161	0.963773	1.04144	1.00511	0.992528	1.01643	0.997802	0.832185	0.970251	1.00844	1.02071	1.05369	1.00713	1.0286	0.984226	0.972777	0.948285	0.984718	0.880469	1.05075	0.970543	0.940635	0.970057	0.984423	1.04676	0.98334	1.02357	0.940353	0.986295	0.91092	1.02788	0.996805	0.992627	0.995212	0.941011	0.955424	1.04645	0.981081	1.18034	0.986393	0.973653	0.976774	1.00562	1.0203	1.01471	1.00411	0.998002
202	chr1	114724162	115294291	0.963773	1.04144	1.00511	0.992528	1.01643	0.997802	0.832185	0.970251	1.00844	1.02071	1.05369	1.00713	1.0286	0.984226	0.972777	0.948285	0.984718	0.880469	1.05075	0.970543	0.940635	0.970057	0.984423	1.04676	0.98334	1.02357	0.940353	0.986295	0.91092	1.02788	0.996805	0.992627	0.995212	0.941011	0.955424	1.04645	0.981081	1.18034	0.986393	0.973653	0.976774	1.00562	1.0203	1.01471	1.00411	0.998002
203	chr1	115294292	115857853	0.963773	1.04144	1.00511	0.992528	1.01643	0.997802	0.832185	0.970251	1.00844	1.02071	1.05369	1.00713	1.0286	0.984226	0.972777	0.948285	0.984718	0.880469	1.05075	0.970543	0.940635	0.970057	0.984423	1.04676	0.98334	1.02357	0.940353	0.986295	0.91092	1.02788	0.996805	0.992627	0.995212	0.941011	0.955424	1.04645	0.981081	1.18034	0.986393	0.973653	0.976774	1.00562	1.0203	1.01471	1.00411	0.998002
204	chr1	115857854	116367679	0.963773	1.04144	1.00511	0.992528	1.01643	0.997802	0.832185	0.970251	1.00844	1.02071	1.05369	1.00713	1.0286	0.984226	0.972777	0.948285	0.984718	0.880469	1.05075	0.970543	0.940635	0.970057	0.984423	1.04676	0.98334	1.02357	0.940353	0.986295	0.91092	1.02788	0.996805	0.992627	0.995212	0.941011	0.955424	1.04645	0.981081	1.18034	0.986393	0.973653	0.976774	1.00562	1.0203	1.01471	1.00411	0.998002
205	chr1	116367680	116941363	0.963773	1.04144	1.00511	0.992528	1.01643	0.997802	0.832185	0.970251	1.00844	1.02071	1.05369	1.00713	1.0286	0.984226	0.972777	0.948285	0.984718	0.880469	1.05075	0.970543	0.940635	0.970057	0.984423	1.04676	0.98334	1.02357	0.940353	0.986295	0.91092	1.02788	0.996805	0.992627	0.995212	0.941011	0.955424	1.04645	0.981081	1.18034	0.986393	0.973653	0.976774	1.00562	1.0203	1.01471	1.00411	0.998002
206	chr1	116941364	117470302	0.963773	1.04144	1.00511	0.992528	1.01643	0.997802	0.832185	0.970251	1.00844	1.02071	1.05369	1.00713	1.0286	0.984226	0.972777	0.948285	0.984718	0.880469	1.05075	0.970543	0.940635	0.970057	0.984423	1.04676	0.98334	1.02357	0.940353	0.986295	0.91092	1.02788	0.996805	0.992627	0.995212	0.941011	0.955424	1.04645	0.981081	1.18034	0.986393	0.973653	0.976774	1.00562	1.0203	1.01471	1.00411	0.998002
207	chr1	117470303	118055014	0.963773	1.04144	1.00511	0.992528	1.01643	0.997802	0.832185	0.970251	1.00844	1.02071	1.05369	1.00713	1.0286	0.984226	0.972777	0.948285	0.984718	0.880469	1.05075	0.970543	0.940635	0.970057	0.984423	1.04676	0.98334	1.02357	0.940353	0.986295	0.91092	1.02788	0.996805	0.992627	0.995212	0.941011	0.955424	1.04645	0.981081	1.18034	0.986393	0.973653	0.976774	1.00562	1.0203	1.01471	1.00411	0.998002
208	chr1	118055015	118598626	0.963773	1.04144	1.00511	0.992528	1.01643	0.997802	0.832185	0.970251	1.00844	1.02071	1.05369	1.00713	1.0286	0.984226	0.972777	0.948285	0.984718	0.880469	1.05075	0.970543	0.940635	0.970057	0.984423	1.04676	0.98334	1.02357	0.940353	0.986295	0.91092	1.02788	0.996805	0.992627	0.995212	0.941011	0.955424	1.04645	0.981081	1.18034	0.986393	0.973653	0.976774	1.00562	1.0203	1.01471	1.00411	0.998002
209	chr1	118598627	119157780	0.963773	1.04144	1.00511	0.992528	1.01643	0.997802	0.832185	0.970251	1.00844	1.02071	1.05369	1.00713	1.0286	0.984226	0.972777	0.948285	0.984718	0.880469	1.05075	0.970543	0.940635	0.970057	0.984423	1.04676	0.98334	1.02357	0.940353	0.986295	0.91092	1.02788	0.996805	0.992627	0.995212	0.941011	0.955424	1.04645	0.981081	1.18034	0.986393	0.973653	0.976774	1.00562	1.0203	1.01471	1.00411	0.998002
210	chr1	119157781	119746918	0.963773	1.04144	1.00511	0.992528	1.01643	0.997802	0.832185	0.970251	1.00844	1.02071	1.05369	1.00713	1.0286	0.984226	0.972777	0.948285	0.984718	0.880469	1.05075	0.970543	0.940635	0.970057	0.984423	1.04676	0.98334	1.02357	0.940353	0.986295	0.91092	1.02788	0.996805	0.992627	0.995212	0.941011	0.955424	1.04645	0.981081	1.18034	0.986393	0.973653	0.976774	1.00562	1.0203	1.01471	1.00411	0.998002
211	chr1	119746919	120301818	0.963773	1.04144	1.00511	0.992528	1.01643	0.997802	0.832185	0.970251	1.00844	1.02071	1.05369	1.00713	1.0286	0.984226	0.972777	0.948285	0.984718	0.880469	1.05075	0.970543	0.940635	0.970057	0.984423	1.04676	0.98334	1.02357	0.940353	0.986295	0.91092	1.02788	0.996805	0.992627	0.995212	0.941011	0.955424	1.04645	0.981081	1.18034	0.986393	0.973653	0.976774	1.00562	1.0203	1.01471	1.00411	0.998002
212	chr1	120301819	120653872	0.963773	1.04144	1.00511	0.992528	1.01643	0.997802	0.832185	0.970251	1.00844	1.02071	1.05369	1.00713	1.0286	0.984226	0.972777	0.948285	0.984718	0.880469	1.05075	0.970543	0.940635	0.970057	0.984423	1.04676	0.98334	1.02357	0.940353	0.986295	0.91092	1.02788	0.996805	0.992627	0.995212	0.941011	0.955424	1.04645	0.981081	1.18034	0.986393	0.973653	0.976774	1.00562	1.0203	1.01471	1.00411	0.998002
213	chr1	120653873	121212059	0.963773	1.04144	1.00511	0.992528	1.01643	0.997802	0.832185	0.970251	1.00844	1.02071	1.05369	1.00713	1.0286	0.984226	0.972777	0.948285	0.984718	0.880469	1.05075	0.970543	0.940635	0.970057	0.984423	1.04676	0.98334	1.02357	0.940353	0.986295	0.91092	1.02788	0.996805	0.992627	0.995212	0.941011	0.955424	1.04645	0.981081	1.18034	0.986393	0.973653	0.976774	1.00562	1.0203	1.01471	1.00411	0.998002
214	chr1	121212060	121484735	0.963773	1.04144	1.00511	0.992528	1.01643	0.997802	0.832185	0.970251	1.00844	1.02071	1.05369	1.00713	1.0286	0.984226	0.972777	0.948285	0.984718	0.880469	1.05075	0.970543	0.940635	0.970057	0.984423	1.04676	0.98334	1.02357	0.940353	0.986295	0.91092	1.02788	0.996805	0.992627	0.995212	0.941011	0.955424	1.04645	0.981081	1.18034	0.986393	0.973653	0.976774	1.00562	1.0203	1.01471	1.00411	0.998002
215	chr1	121484736	121485262	0.963773	1.04144	1.00511	0.992528	1.01643	0.997802	0.832185	0.970251	1.00844	1.02071	1.05369	1.00713	1.0286	0.984226	0.972777	0.948285	0.984718	0.880469	1.05075	0.970543	0.940635	0.970057	0.984423	1.04676	0.98334	1.02357	0.940353	0.986295	0.91092	1.02788	0.996805	0.992627	0.995212	0.941011	0.955424	1.04645	0.981081	1.18034	0.986393	0.973653	0.976774	1.00562	1.0203	1.01471	1.00411	0.998002
216	chr1	121485263	142635281	0.963773	1.04144	1.00511	0.992528	1.01643	0.997802	1.1266	1.59712	1.00844	1.02071	1.05369	1.00713	1.0286	0.984226	0.972777	0.948285	0.984718	1.42305	1.05075	0.970543	0.940635	0.970057	0.984423	1.04676	0.98334	1.02357	0.940353	0.986295	0.91092	1.02788	0.996805	0.992627	0.995212	0.941011	0.955424	1.04645	0.981081	1.18034	0.986393	0.973653	0.976774	1.00562	1.0203	1.01471	1.00411	0.998002
217	chr1	142635282	142860790	0.963773	1.04144	1.00511	0.992528	1.01643	0.997802	1.1266	1.59712	1.00844	1.02071	1.05369	1.00713	1.0286	0.984226	0.972777	0.948285	0.984718	1.42305	1.05075	0.970543	0.940635	0.970057	0.984423	1.04676	0.98334	1.02357	0.940353	0.986295	0.91092	1.02788	0.996805	0.992627	0.995212	0.941011	0.955424	1.04645	0.981081	1.18034	0.986393	0.973653	0.976774	1.00562	1.0203	1.01471	1.00411	0.998002
218	chr1	142860791	143228925	0.963773	1.04144	1.00511	0.992528	1.01643	0.997802	1.1266	1.01329	1.00844	1.02071	1.05369	1.00713	1.0286	0.984226	0.972777	0.948285	0.984718	1.42305	1.05075	0.970543	0.940635	0.970057	0.984423	1.04676	0.98334	1.02357	0.940353	0.986295	0.91092	1.02788	0.996805	0.992627	0.995212	0.941011	0.955424	1.04645	0.981081	1.18034	0.986393	0.973653	0.976774	1.00562	1.0203	1.01471	1.00411	0.998002
219	chr1	143228926	143651621	0.963773	1.04144	1.00511	0.992528	1.01643	0.997802	1.1266	1.01329	1.00844	1.02071	1.05369	1.00713	1.0286	0.984226	0.972777	0.948285	0.984718	1.42305	1.05075	0.970543	0.940635	0.970057	0.984423	1.04676	0.98334	1.02357	0.940353	0.986295	0.91092	1.02788	0.996805	0.992627	0.995212	0.941011	0.955424	1.04645	0.885591	1.18034	0.986393	0.973653	0.976774	1.00562	1.0203	1.01471	1.00411	0.998002
220	chr1	143651622	144073980	0.963773	1.04144	1.00511	0.992528	1.01643	0.997802	1.1266	1.01329	1.00844	1.02071	1.05369	1.00713	1.0286	0.984226	0.972777	0.948285	0.984718	1.42305	1.05075	0.970543	0.940635	0.970057	0.984423	1.04676	0.98334	1.02357	0.940353	0.986295	0.91092	1.02788	0.996805	0.992627	0.995212	0.941011	0.955424	1.04645	0.885591	1.18034	0.986393	0.973653	0.976774	1.00562	1.0203	1.01471	1.00411	0.998002
221	chr1	144073981	144687377	0.963773	1.04144	1.00511	0.992528	1.01643	0.997802	1.1266	1.01329	1.00844	1.02071	1.05369	1.00713	1.0286	0.984226	0.972777	0.948285	0.984718	1.42305	1.05075	0.970543	0.940635	0.970057	0.984423	1.04676	0.98334	1.02357	0.940353	0.986295	0.91092	1.02788	0.996805	0.992627	0.995212	0.941011	0.955424	1.04645	0.885591	1.18034	0.986393	0.973653	0.976774	1.00562	1.0203	1.01471	1.00411	0.998002
222	chr1	144687378	145014503	0.963773	0.951325	1.00511	0.992528	1.01643	0.997802	0.815462	1.01329	1.00844	1.02071	1.05369	1.00713	1.0286	0.984226	0.972777	0.948285	0.984718	0.830938	1.05075	0.970543	0.940635	0.970057	0.984423	1.04676	0.98334	1.02357	0.940353	0.986295	0.91092	1.02788	0.996805	0.992627	0.995212	0.941011	0.955424	1.04645	0.885591	1.0002	0.986393	0.973653	0.976774	1.00562	1.0203	1.01471	1.00411	0.998002
223	chr1	145014504	145200569	0.963773	0.951325	1.00511	0.992528	1.01643	0.997802	0.815462	1.01329	1.00844	1.02071	1.05369	1.00713	1.0286	0.984226	0.972777	0.948285	0.984718	0.830938	1.05075	0.970543	0.940635	0.970057	0.984423	1.04676	0.98334	1.02357	0.940353	0.986295	0.91092	1.02788	0.996805	0.992627	0.995212	0.941011	0.955424	1.04645	0.885591	1.0002	0.986393	0.973653	0.976774	1.00562	1.0203	1.01471	1.00411	0.998002
224	chr1	145200570	145471344	0.963773	0.951325	1.00511	0.992528	1.01643	0.997802	0.815462	1.01329	1.00844	1.02071	1.05369	1.00713	1.0286	0.984226	0.972777	0.948285	0.984718	0.830938	1.05075	0.970543	0.940635	0.970057	0.984423	1.04676	0.98334	1.02357	0.940353	0.986295	0.91092	1.02788	0.996805	0.992627	0.995212	0.941011	0.955424	1.04645	0.885591	1.0002	0.986393	0.973653	0.976774	1.00562	1.0203	1.01471	1.00411	0.998002
225	chr1	145471345	146013477	0.963773	0.951325	1.00511	0.992528	1.01643	0.997802	0.815462	1.01329	1.00844	1.02071	1.05369	1.00713	1.0286	0.984226	0.972777	0.948285	0.984718	0.830938	1.05075	0.970543	0.940635	0.970057	0.984423	1.04676	0.98334	1.02357	0.940353	0.986295	0.91092	1.02788	0.996805	0.992627	0.995212	0.941011	0.955424	1.04645	0.885591	1.0002	0.986393	0.973653	0.976774	1.00562	1.0203	1.01471	1.00411	0.998002
226	chr1	146013478	146590495	0.963773	0.951325	1.00511	0.992528	1.01643	0.997802	0.815462	1.01329	1.00844	1.02071	1.05369	1.00713	1.0286	0.984226	0.972777	0.948285	0.984718	0.830938	1.05075	0.970543	0.940635	0.970057	0.984423	1.04676	0.98334	1.02357	0.940353	0.986295	0.91092	1.02788	0.996805	0.992627	0.995212	0.941011	0.955424	1.04645	0.885591	1.0002	0.986393	0.973653	0.976774	1.00562	1.0203	1.01471	1.00411	0.998002
227	chr1	146590496	147187418	0.963773	0.951325	1.00511	0.992528	1.01643	0.997802	0.815462	1.01329	1.00844	1.02071	1.05369	1.00713	1.0286	0.984226	0.972777	0.948285	0.984718	0.830938	1.05075	0.970543	0.940635	0.970057	0.984423	1.04676	0.98334	1.02357	0.940353	0.986295	0.91092	1.02788	0.996805	0.992627	0.995212	0.941011	0.955424	1.04645	0.885591	1.0002	0.986393	0.973653	0.976774	1.00562	1.0203	1.01471	1.00411	0.998002
228	chr1	147187419	147678470	0.963773	0.951325	1.00511	0.992528	1.01643	0.997802	0.815462	1.01329	1.00844	1.02071	1.05369	1.00713	1.0286	0.984226	0.972777	0.948285	0.984718	0.830938	1.05075	0.970543	0.940635	0.970057	0.984423	1.04676	0.98334	1.02357	0.940353	0.986295	0.91092	1.02788	0.996805	0.992627	0.995212	0.941011	0.955424	1.04645	0.885591	1.0002	0.986393	0.973653	0.976774	1.00562	1.0203	1.01471	1.00411	0.998002
229	chr1	147678471	148250251	0.963773	0.951325	1.00511	0.992528	1.01643	0.997802	0.815462	1.01329	1.00844	1.02071	1.05369	1.00713	1.0286	0.984226	0.972777	0.948285	0.984718	0.830938	1.05075	0.970543	0.940635	0.970057	0.984423	1.04676	0.98334	1.02357	0.940353	0.986295	0.91092	1.02788	0.996805	0.992627	0.995212	0.941011	0.955424	1.04645	0.885591	1.0002	0.986393	0.973653	0.976774	1.00562	1.0203	1.01471	1.00411	0.998002
230	chr1	148250252	148827752	0.963773	0.951325	1.00511	0.992528	1.01643	0.997802	0.815462	1.01329	1.00844	1.02071	1.05369	1.00713	1.0286	0.984226	0.972777	0.948285	0.984718	0.830938	1.05075	0.970543	0.940635	0.970057	0.984423	1.04676	0.98334	1.02357	0.940353	0.986295	0.91092	1.02788	0.996805	0.992627	0.995212	0.941011	0.955424	1.04645	0.885591	1.0002	0.986393	0.973653	0.976774	1.00562	1.0203	1.01471	1.00411	0.998002
231	chr1	148827753	149106668	0.963773	0.951325	1.00511	0.992528	1.01643	0.997802	0.815462	1.01329	1.00844	1.02071	1.05369	1.00713	1.0286	0.984226	0.972777	0.948285	0.984718	0.830938	1.05075	0.970543	0.940635	0.970057	0.984423	1.04676	0.98334	1.02357	0.940353	0.986295	0.91092	1.02788	0.996805	0.992627	0.995212	0.941011	0.955424	1.04645	0.885591	1.0002	0.986393	0.973653	0.976774	1.00562	1.0203	1.01471	1.00411	0.998002
232	chr1	149106669	149546402	0.963773	0.951325	1.00511	0.992528	1.01643	0.997802	0.815462	1.01329	1.00844	1.02071	1.05369	1.00713	1.0286	0.984226	0.972777	0.948285	0.984718	0.830938	1.05075	0.970543	0.940635	0.970057	0.984423	1.04676	0.98334	1.02357	0.940353	0.986295	0.91092	1.02788	0.996805	0.992627	0.995212	0.941011	0.955424	1.04645	0.885591	1.0002	0.986393	0.973653	0.976774	1.00562	1.0203	1.01471	1.00411	0.998002
233	chr1	149546403	149963693	0.963773	0.951325	1.00511	0.992528	1.01643	0.997802	0.815462	1.01329	1.00844	1.02071	1.05369	1.00713	1.0286	0.984226	0.972777	0.948285	0.984718	0.830938	1.05075	0.970543	0.940635	0.970057	0.984423	1.04676	0.98334	1.02357	0.940353	0.986295	0.91092	1.02788	0.996805	0.992627	0.995212	0.941011	0.955424	1.04645	0.885591	1.0002	0.986393	0.973653	0.976774	1.00562	1.0203	1.01471	1.00411	0.998002
234	chr1	149963694	150544196	0.963773	0.951325	1.00511	0.992528	1.01643	0.997802	0.815462	1.01329	1.00844	1.02071	1.05369	1.00713	1.0286	0.984226	0.972777	0.948285	0.984718	0.681608	1.05075	0.970543	0.940635	0.970057	0.984423	1.04676	0.98334	1.02357	0.940353	0.986295	0.91092	1.02788	0.996805	0.992627	0.995212	0.941011	0.955424	1.04645	0.885591	1.0002	0.986393	0.973653	0.976774	1.00562	1.0203	1.01471	1.00411	0.998002
235	chr1	150544197	151119814	0.963773	0.951325	1.00511	0.992528	1.01643	0.997802	0.815462	1.01329	1.00844	1.02071	1.05369	1.00713	1.0286	0.984226	0.972777	0.948285	0.984718	0.681608	1.05075	0.970543	0.940635	0.970057	0.984423	1.04676	0.98334	1.02357	0.940353	0.986295	0.91092	1.02788	0.996805	0.992627	0.995212	0.941011	0.955424	1.04645	0.885591	1.0002	0.986393	0.973653	0.976774	1.00562	1.0203	1.01471	1.00411	0.998002
236	chr1	151119815	151655918	0.963773	0.951325	1.00511	0.992528	1.01643	0.997802	0.815462	1.01329	1.00844	1.02071	1.05369	1.00713	1.0286	0.984226	0.972777	0.948285	0.984718	0.681608	1.05075	0.970543	0.940635	0.970057	0.984423	1.04676	0.98334	1.02357	0.940353	0.986295	0.91092	1.02788	0.996805	0.992627	0.995212	0.941011	0.955424	1.04645	0.885591	1.0002	0.986393	0.973653	0.976774	1.00562	1.0203	1.01471	1.00411	0.998002
237	chr1	151655919	152197006	0.963773	0.951325	1.00511	0.992528	1.01643	0.997802	0.959157	1.01329	1.00844	1.02071	1.05369	1.00713	1.0286	0.984226	0.972777	0.948285	0.984718	0.681608	1.05075	0.970543	0.940635	0.970057	0.984423	1.04676	0.98334	1.02357	0.940353	0.986295	0.91092	1.02788	0.996805	0.992627	0.995212	0.941011	0.955424	1.04645	0.885591	1.0002	0.986393	0.973653	0.976774	1.00562	1.0203	1.01471	1.00411	0.998002
238	chr1	152197007	152788205	0.963773	0.951325	1.00511	0.992528	1.01643	0.997802	0.959157	1.01329	1.00844	1.02071	1.05369	1.00713	1.0286	0.984226	0.972777	0.948285	0.984718	0.681608	1.05075	0.970543	0.940635	0.970057	0.984423	1.04676	0.98334	1.02357	0.940353	0.986295	0.91092	1.02788	0.996805	0.992627	0.995212	0.941011	0.955424	1.04645	0.885591	1.0002	0.986393	0.973653	0.976774	1.00562	1.0203	1.01471	1.00411	0.998002
239	chr1	152788206	153374688	0.963773	0.951325	1.00511	0.992528	1.01643	0.997802	0.959157	1.01329	1.00844	1.02071	1.05369	1.00713	1.0286	0.984226	0.972777	0.948285	0.984718	0.681608	1.05075	0.970543	0.940635	0.970057	0.984423	1.04676	0.98334	1.02357	0.940353	0.986295	0.91092	1.02788	0.996805	0.992627	0.995212	0.941011	0.955424	1.04645	0.885591	1.0002	0.986393	0.973653	0.976774	1.00562	1.0203	1.01471	1.00411	0.998002
240	chr1	153374689	153943897	0.963773	0.951325	1.00511	0.992528	1.01643	0.997802	0.959157	1.01329	1.00844	1.02071	1.05369	1.00713	1.0286	0.984226	0.972777	0.948285	0.984718	0.681608	1.05075	0.970543	0.940635	0.970057	0.984423	1.04676	0.98334	1.02357	0.940353	0.986295	0.91092	1.02788	0.996805	0.992627	0.995212	0.941011	0.955424	1.04645	0.885591	1.0002	0.986393	0.973653	0.976774	1.00562	1.0203	1.01471	1.00411	0.998002
241	chr1	153943898	154509355	0.963773	0.951325	1.00511	0.992528	1.01643	0.997802	0.959157	1.01329	1.00844	1.02071	1.05369	1.00713	1.0286	0.984226	0.972777	0.948285	0.984718	0.681608	1.05075	0.970543	0.940635	0.970057	0.984423	1.04676	0.98334	1.02357	0.940353	0.986295	0.91092	1.02788	0.996805	0.992627	0.995212	0.941011	0.955424	1.04645	0.885591	1.0002	0.986393	0.973653	0.976774	1.00562	1.0203	1.01471	1.00411	0.998002
242	chr1	154509356	155035872	0.963773	0.951325	1.00511	0.992528	1.01643	0.997802	0.959157	1.01329	1.00844	1.02071	1.05369	1.00713	1.0286	0.984226	0.972777	0.948285	0.984718	0.681608	1.05075	0.970543	0.940635	0.970057	0.984423	1.04676	0.98334	1.02357	0.940353	0.986295	0.91092	1.02788	0.996805	0.992627	0.995212	0.941011	0.955424	1.04645	0.885591	1.0002	0.986393	0.973653	0.976774	1.00562	1.0203	1.01471	1.00411	0.998002
243	chr1	155035873	155597192	0.963773	0.951325	1.00511	0.992528	1.01643	0.997802	0.959157	1.01329	1.00844	1.02071	1.05369	1.00713	1.0286	0.984226	0.972777	0.948285	0.984718	0.681608	1.05075	0.970543	0.940635	0.970057	0.984423	1.04676	0.98334	1.02357	0.940353	0.986295	0.91092	1.02788	0.996805	0.992627	0.995212	0.941011	0.955424	1.04645	0.885591	1.0002	0.986393	0.973653	0.976774	1.00562	1.0203	1.01471	1.00411	0.998002
244	chr1	155597193	156160924	0.963773	0.951325	1.00511	0.992528	1.01643	0.997802	0.959157	1.01329	1.00844	1.02071	1.05369	1.00713	1.0286	0.984226	0.972777	0.948285	0.984718	0.681608	1.05075	0.970543	0.940635	0.970057	0.984423	1.04676	0.98334	1.02357	0.940353	0.986295	0.91092	1.02788	0.996805	0.992627	0.995212	0.941011	0.955424	1.04645	0.885591	1.0002	0.986393	0.973653	0.976774	1.00562	1.0203	1.01471	1.00411	0.998002
245	chr1	156160925	156726436	0.963773	0.951325	1.00511	0.992528	1.01643	0.997802	0.959157	1.01329	1.00844	1.02071	1.05369	1.00713	1.0286	0.984226	0.972777	0.948285	0.984718	0.681608	1.05075	0.970543	0.940635	0.970057	0.984423	1.04676	0.98334	1.02357	0.940353	0.986295	0.91092	1.02788	0.996805	0.992627	0.995212	0.941011	0.955424	1.04645	0.885591	1.0002	0.986393	0.973653	0.976774	1.00562	1.0203	1.01471	1.00411	0.998002
246	chr1	156726437	157257301	0.963773	0.951325	1.00511	0.992528	1.01643	0.997802	0.959157	1.01329	1.00844	1.02071	1.05369	1.00713	1.0286	0.984226	0.972777	0.948285	0.984718	0.681608	1.05075	0.970543	0.940635	0.970057	0.984423	1.04676	0.98334	1.02357	0.940353	0.986295	0.91092	1.02788	0.996805	0.992627	0.995212	0.941011	0.955424	1.04645	0.885591	1.0002	0.986393	0.973653	0.976774	1.00562	1.0203	1.01471	1.00411	0.998002
247	chr1	157257302	157844142	0.963773	0.951325	1.00511	0.992528	1.01643	0.997802	0.959157	1.01329	1.00844	1.02071	1.05369	1.00713	1.0286	0.984226	0.972777	0.948285	0.984718	0.681608	1.05075	0.970543	0.940635	0.970057	0.984423	1.04676	0.98334	1.02357	0.940353	0.986295	0.91092	1.02788	0.996805	0.992627	0.995212	0.941011	0.955424	1.04645	0.885591	1.0002	0.986393	0.973653	0.976774	1.00562	1.0203	1.01471	1.00411	0.998002
248	chr1	157844143	158423854	0.963773	0.951325	1.00511	0.992528	1.01643	0.997802	0.959157	1.01329	1.00844	1.02071	1.05369	1.00713	1.0286	0.984226	0.972777	0.948285	0.984718	0.681608	1.05075	0.970543	0.940635	0.970057	0.984423	1.04676	0.98334	1.02357	0.940353	0.986295	0.91092	1.02788	0.996805	0.992627	0.995212	0.941011	0.955424	1.04645	0.885591	1.0002	0.986393	0.973653	0.976774	1.00562	1.0203	1.01471	1.00411	0.998002
249	chr1	158423855	159037618	0.963773	0.951325	1.00511	0.992528	1.01643	0.997802	0.959157	1.01329	1.00844	1.02071	1.05369	1.00713	1.0286	0.984226	0.972777	0.948285	0.984718	0.681608	1.05075	0.970543	0.940635	0.970057	0.984423	1.04676	0.98334	1.02357	0.940353	0.986295	0.91092	1.02788	0.996805	0.992627	0.995212	0.941011	0.955424	1.04645	0.885591	1.0002	0.986393	0.973653	0.976774	1.00562	1.0203	1.01471	1.00411	0.998002
250	chr1	159037619	159634668	0.963773	0.951325	1.00511	0.992528	1.01643	0.997802	0.959157	1.01329	1.00844	1.02071	1.05369	1.00713	1.0286	0.984226	0.972777	0.948285	0.984718	0.681608	1.05075	0.970543	0.940635	0.970057	0.984423	1.04676	0.98334	1.02357	0.940353	0.986295	0.91092	1.02788	0.996805	0.992627	0.995212	0.941011	0.955424	1.04645	0.885591	1.0002	0.986393	0.973653	0.976774	1.00562	1.0203	1.01471	1.00411	0.998002
251	chr1	159634669	160173468	0.963773	0.951325	1.00511	0.992528	1.01643	0.997802	0.959157	1.01329	1.00844	1.02071	1.05369	1.00713	1.0286	0.984226	0.972777	0.948285	0.984718	0.681608	1.05075	0.970543	0.940635	0.970057	0.984423	1.04676	0.98334	1.02357	0.940353	0.986295	0.91092	1.02788	0.996805	0.992627	0.995212	0.941011	0.955424	1.04645	0.885591	1.0002	0.986393	0.973653	0.976774	1.00562	1.0203	1.01471	1.00411	0.998002
252	chr1	160173469	160725925	0.963773	0.951325	1.00511	0.992528	1.01643	0.997802	0.959157	1.01329	1.00844	1.02071	1.05369	1.00713	1.0286	0.984226	0.972777	0.948285	0.984718	0.681608	1.05075	0.970543	0.940635	0.970057	0.984423	1.04676	0.98334	1.02357	0.940353	0.986295	0.91092	1.02788	0.996805	0.992627	0.995212	0.941011	0.955424	1.04645	0.885591	1.0002	0.986393	0.973653	0.976774	1.00562	1.0203	1.01471	1.00411	0.998002
253	chr1	160725926	161305874	0.963773	0.951325	1.00511	0.992528	1.01643	0.997802	0.959157	1.01329	1.00844	1.02071	1.05369	1.00713	1.0286	0.984226	0.972777	0.948285	0.984718	0.681608	1.05075	0.970543	0.940635	0.970057	0.984423	1.04676	0.98334	1.02357	0.940353	0.986295	0.91092	1.02788	0.996805	0.992627	0.995212	0.941011	0.955424	1.04645	0.885591	1.0002	0.986393	0.973653	0.976774	1.00562	1.0203	1.01471	1.00411	0.998002
254	chr1	161305875	161802710	0.963773	0.951325	1.00511	0.992528	1.01643	0.997802	0.959157	1.01329	1.00844	1.02071	1.05369	1.00713	1.0286	0.984226	0.972777	0.948285	0.984718	0.681608	1.05075	0.970543	0.940635	0.970057	0.984423	1.04676	0.98334	1.02357	0.940353	0.986295	0.91092	1.02788	0.996805	0.992627	0.995212	0.941011	0.955424	1.04645	0.885591	1.0002	0.986393	0.973653	0.976774	1.00562	1.0203	1.01471	1.00411	0.998002
255	chr1	161802711	162348888	0.963773	0.951325	1.00511	0.992528	1.01643	0.997802	0.959157	1.01329	1.00844	1.02071	1.05369	1.00713	1.0286	0.984226	0.972777	0.948285	0.984718	0.681608	1.05075	0.970543	0.940635	0.970057	0.984423	1.04676	0.98334	1.02357	0.940353	0.986295	0.91092	1.02788	0.996805	0.992627	0.995212	0.941011	0.955424	1.04645	0.885591	1.0002	0.986393	0.973653	0.976774	1.00562	1.0203	1.01471	1.00411	0.998002
256	chr1	162348889	162926125	0.963773	0.951325	1.00511	0.992528	1.01643	0.997802	0.959157	1.01329	1.00844	1.02071	1.05369	1.00713	1.0286	0.984226	0.972777	0.948285	0.984718	0.681608	1.05075	0.970543	0.940635	0.970057	0.984423	1.04676	0.98334	1.02357	0.940353	0.986295	0.91092	1.02788	0.996805	0.992627	0.995212	0.941011	0.955424	1.04645	0.885591	1.0002	0.986393	0.973653	0.976774	1.00562	1.0203	1.01471	1.00411	0.998002
257	chr1	162926126	163495169	0.963773	0.951325	1.00511	0.992528	1.01643	0.997802	0.959157	1.01329	1.00844	1.02071	1.05369	1.00713	1.0286	0.984226	0.972777	0.948285	0.984718	0.681608	1.05075	0.970543	0.940635	0.970057	0.984423	1.04676	0.98334	1.02357	0.940353	0.986295	0.91092	1.02788	0.996805	0.992627	0.995212	0.941011	0.955424	1.04645	0.885591	1.0002	0.986393	0.973653	0.976774	1.00562	1.0203	1.01471	1.00411	0.998002
258	chr1	163495170	164081890	0.963773	0.951325	1.00511	0.992528	1.01643	0.997802	0.959157	1.01329	1.00844	1.02071	1.05369	1.00713	1.0286	0.984226	0.972777	0.948285	0.984718	0.681608	1.05075	0.970543	0.940635	0.970057	0.984423	1.04676	0.98334	1.02357	0.940353	0.986295	0.91092	1.02788	0.996805	0.992627	0.995212	0.941011	0.955424	1.04645	0.885591	1.0002	0.986393	0.973653	0.976774	1.00562	1.0203	1.01471	1.00411	0.998002
259	chr1	164081891	164676271	0.963773	0.951325	1.00511	0.992528	1.01643	0.997802	0.959157	1.01329	1.00844	1.02071	1.05369	1.00713	1.0286	0.984226	0.972777	0.948285	0.984718	0.681608	1.05075	0.970543	0.940635	0.970057	0.984423	1.04676	0.98334	1.02357	0.940353	0.986295	0.91092	1.02788	0.996805	0.992627	0.995212	0.941011	0.955424	1.04645	0.885591	1.0002	0.986393	0.973653	0.976774	1.00562	1.0203	1.01471	1.00411	0.998002
260	chr1	164676272	165237640	0.963773	0.951325	1.00511	0.992528	1.01643	0.997802	0.959157	1.01329	1.00844	1.02071	1.05369	1.00713	1.0286	0.984226	0.972777	0.948285	0.984718	0.681608	1.05075	0.970543	0.940635	0.970057	0.984423	1.04676	0.98334	1.02357	0.940353	0.986295	0.91092	1.02788	0.996805	0.992627	0.995212	0.941011	0.955424	1.04645	0.885591	1.0002	0.986393	0.973653	0.976774	1.00562	1.0203	1.01471	1.00411	0.998002
261	chr1	165237641	165778434	0.963773	0.951325	1.00511	0.992528	1.01643	0.997802	0.959157	1.01329	1.00844	1.02071	1.05369	1.00713	1.0286	0.984226	0.972777	0.948285	0.984718	0.681608	1.05075	0.970543	0.940635	0.970057	0.984423	1.04676	0.98334	1.02357	0.940353	0.986295	0.91092	1.02788	0.996805	0.992627	0.995212	0.941011	0.955424	1.04645	0.885591	1.0002	0.986393	0.973653	0.976774	1.00562	1.0203	1.01471	1.00411	0.998002
262	chr1	165778435	166360792	0.963773	0.951325	1.00511	0.992528	1.01643	0.997802	0.959157	1.01329	1.00844	1.02071	1.05369	1.00713	1.0286	0.984226	0.972777	0.948285	0.984718	0.681608	1.05075	0.970543	0.940635	0.970057	0.984423	1.04676	0.98334	1.02357	0.940353	0.986295	0.91092	1.02788	0.996805	0.992627	0.995212	0.941011	0.955424	1.04645	0.885591	1.0002	0.986393	0.973653	0.976774	1.00562	1.0203	1.01471	1.00411	0.998002
263	chr1	166360793	166974608	0.963773	0.951325	1.00511	0.992528	1.01643	0.997802	0.959157	1.01329	1.00844	1.02071	1.05369	1.00713	1.0286	0.984226	0.972777	0.948285	0.984718	0.681608	1.05075	0.970543	0.940635	0.970057	0.984423	1.04676	0.98334	1.02357	0.940353	0.986295	0.91092	1.02788	0.996805	0.992627	0.995212	0.941011	0.955424	1.04645	0.885591	1.0002	0.986393	0.973653	0.976774	1.00562	1.0203	1.01471	1.00411	0.998002
264	chr1	166974609	167537666	0.963773	0.951325	1.00511	0.992528	1.01643	0.997802	0.959157	1.01329	1.00844	1.02071	1.05369	1.00713	1.0286	0.984226	0.972777	0.948285	0.984718	0.681608	1.05075	0.970543	0.940635	0.970057	0.984423	1.04676	0.98334	1.02357	0.940353	0.986295	0.91092	1.02788	0.996805	0.992627	0.995212	0.941011	0.955424	1.04645	0.885591	1.0002	0.986393	0.973653	0.976774	1.00562	1.0203	1.01471	1.00411	0.998002
265	chr1	167537667	168103992	0.963773	0.951325	1.00511	0.992528	1.01643	0.997802	0.959157	1.01329	1.00844	1.02071	1.05369	1.00713	1.0286	0.984226	0.972777	0.948285	0.984718	0.681608	1.05075	0.970543	0.940635	0.970057	0.984423	1.04676	0.98334	1.02357	0.940353	0.986295	0.91092	1.02788	0.996805	0.992627	0.995212	0.941011	0.955424	1.04645	0.885591	1.0002	0.986393	0.973653	0.976774	1.00562	1.0203	1.01471	1.00411	0.998002
266	chr1	168103993	168662961	0.963773	0.951325	1.00511	0.992528	1.01643	0.997802	0.959157	1.01329	1.00844	1.02071	1.05369	1.00713	1.0286	0.984226	0.972777	0.948285	0.984718	0.374411	1.05075	0.970543	0.940635	0.970057	0.984423	1.04676	0.98334	1.02357	0.940353	0.986295	0.91092	1.02788	0.996805	0.992627	0.995212	0.941011	0.955424	1.04645	0.885591	1.0002	0.986393	0.973653	0.976774	1.00562	1.0203	1.01471	1.00411	0.998002
267	chr1	168662962	169217086	0.963773	0.951325	1.00511	0.992528	1.01643	0.997802	0.959157	1.01329	1.00844	1.02071	1.05369	1.00713	1.0286	0.984226	0.972777	0.948285	0.984718	0.374411	1.05075	0.970543	0.940635	0.970057	0.984423	1.04676	0.98334	1.02357	0.940353	0.986295	0.91092	1.02788	0.996805	0.992627	0.995212	0.941011	0.955424	1.04645	0.885591	1.0002	0.986393	0.973653	0.976774	1.00562	1.0203	1.01471	1.00411	0.998002
268	chr1	169217087	169795787	0.963773	0.951325	1.00511	0.992528	1.01643	0.997802	0.959157	1.01329	1.00844	1.02071	1.05369	1.00713	1.0286	0.984226	0.972777	0.948285	0.984718	0.374411	1.05075	0.970543	0.940635	0.970057	0.984423	1.04676	0.98334	1.02357	0.940353	0.986295	0.91092	1.02788	0.996805	0.992627	0.995212	0.941011	0.955424	1.04645	0.885591	1.0002	0.986393	0.973653	0.976774	1.00562	1.0203	1.01471	1.00411	0.998002
269	chr1	169795788	170410723	0.963773	0.951325	1.00511	0.992528	1.01643	0.997802	0.959157	1.01329	1.00844	1.02071	1.05369	1.00713	1.0286	0.984226	0.972777	0.948285	0.984718	0.374411	1.05075	0.970543	0.940635	0.970057	0.984423	1.04676	0.98334	1.02357	0.940353	0.986295	0.91092	1.02788	0.996805	0.992627	0.995212	0.941011	0.955424	1.04645	0.885591	1.0002	0.986393	0.973653	0.976774	1.00562	1.0203	1.01471	1.00411	0.998002
270	chr1	170410724	170971929	0.963773	0.951325	1.00511	0.992528	1.01643	0.997802	0.959157	1.01329	1.00844	1.02071	1.05369	1.00713	1.0286	0.984226	0.972777	0.948285	0.984718	0.374411	1.05075	0.970543	0.940635	0.970057	0.984423	1.04676	0.98334	1.02357	0.940353	0.986295	0.91092	1.02788	0.996805	0.992627	0.995212	0.941011	0.955424	1.04645	0.885591	1.0002	0.986393	0.973653	0.976774	1.00562	1.0203	1.01471	1.00411	0.998002
271	chr1	170971930	171520101	0.963773	0.951325	1.00511	0.992528	1.01643	0.997802	0.959157	1.01329	1.00844	1.02071	1.05369	1.00713	1.0286	0.984226	0.972777	0.948285	0.984718	0.622632	1.05075	0.970543	0.940635	0.970057	0.984423	1.04676	0.98334	1.02357	0.940353	0.986295	0.91092	1.02788	0.996805	0.992627	0.995212	0.941011	0.955424	1.04645	0.885591	1.0002	0.986393	0.973653	0.976774	1.00562	1.0203	1.01471	1.00411	0.998002
272	chr1	171520102	172104104	0.963773	0.951325	1.00511	0.992528	1.01643	0.997802	0.959157	1.01329	1.00844	1.02071	1.05369	1.00713	1.0286	0.984226	0.972777	0.948285	0.984718	0.622632	1.05075	0.970543	0.940635	0.970057	0.984423	1.04676	0.98334	1.02357	0.940353	0.986295	0.91092	1.02788	0.996805	0.992627	0.995212	0.941011	0.955424	1.04645	0.885591	1.0002	0.986393	0.973653	0.976774	1.00562	1.0203	1.01471	1.00411	0.998002
273	chr1	172104105	172661128	0.963773	0.951325	1.00511	0.992528	1.01643	0.997802	0.959157	1.01329	1.00844	1.02071	1.05369	1.00713	1.0286	0.984226	0.972777	0.948285	0.984718	0.622632	1.05075	0.970543	0.940635	0.970057	0.984423	1.04676	0.98334	1.02357	0.940353	0.986295	0.91092	1.02788	0.996805	0.992627	0.995212	0.941011	0.955424	1.04645	0.885591	1.0002	0.986393	0.973653	0.976774	1.00562	1.0203	1.01471	1.00411	0.998002
274	chr1	172661129	173233587	0.963773	0.951325	1.00511	0.992528	1.01643	0.997802	0.959157	1.01329	1.00844	1.02071	1.05369	1.00713	1.0286	0.984226	0.972777	0.948285	0.984718	0.622632	1.05075	0.970543	0.940635	0.970057	0.984423	1.04676	0.98334	1.02357	0.940353	0.986295	0.91092	1.02788	0.996805	0.992627	0.995212	0.941011	0.955424	1.04645	0.885591	1.0002	0.986393	0.973653	0.976774	1.00562	1.0203	1.01471	1.00411	0.998002
275	chr1	173233588	173818743	0.963773	0.951325	1.00511	0.992528	1.01643	0.997802	0.959157	1.01329	1.00844	1.02071	1.05369	1.00713	1.0286	0.984226	0.972777	0.948285	0.984718	0.622632	1.05075	0.970543	0.940635	0.970057	0.984423	1.04676	0.98334	1.02357	0.940353	0.986295	0.91092	1.02788	0.996805	0.992627	0.995212	0.941011	0.955424	1.04645	0.885591	1.0002	0.986393	0.973653	0.976774	1.00562	1.0203	1.01471	1.00411	0.998002
276	chr1	173818744	174431325	0.963773	0.951325	1.00511	0.992528	1.01643	0.997802	0.959157	1.01329	1.00844	1.02071	1.05369	1.00713	1.0286	0.984226	0.972777	0.948285	0.984718	0.622632	1.05075	0.970543	0.940635	0.970057	0.984423	1.04676	0.98334	1.02357	0.940353	0.986295	0.91092	1.02788	0.996805	0.992627	0.995212	0.941011	0.955424	1.04645	0.885591	1.0002	0.986393	0.973653	0.976774	1.00562	1.0203	1.01471	1.00411	0.998002
277	chr1	174431326	175045446	0.963773	0.951325	1.00511	0.992528	1.01643	0.997802	0.959157	1.01329	1.00844	1.02071	1.05369	1.00713	1.0286	0.984226	0.972777	0.948285	0.984718	0.622632	1.05075	0.970543	0.940635	0.970057	0.984423	1.04676	0.98334	1.02357	0.940353	0.986295	0.91092	1.02788	0.996805	0.992627	0.995212	0.941011	0.955424	1.04645	0.885591	1.0002	0.986393	0.973653	0.976774	1.00562	1.0203	1.01471	1.00411	0.998002
278	chr1	175045447	175597581	0.963773	0.951325	1.00511	0.992528	1.01643	0.997802	0.959157	1.01329	1.00844	1.02071	1.05369	1.00713	1.0286	0.984226	0.972777	0.948285	0.984718	0.622632	1.05075	0.970543	0.940635	0.970057	0.984423	1.04676	0.98334	1.02357	0.940353	0.986295	0.91092	1.02788	0.996805	0.992627	0.995212	0.941011	0.955424	1.04645	0.885591	1.0002	0.986393	0.973653	0.976774	1.00562	1.0203	1.01471	1.00411	0.998002
279	chr1	175597582	176166425	0.963773	0.951325	1.00511	0.992528	1.01643	0.997802	0.959157	1.01329	1.00844	1.02071	1.05369	1.00713	1.0286	0.984226	0.972777	0.948285	0.984718	0.622632	1.05075	0.970543	0.940635	0.970057	0.984423	1.04676	0.98334	1.02357	0.940353	0.986295	0.91092	1.02788	0.996805	0.992627	0.995212	0.941011	0.955424	1.04645	0.885591	1.0002	0.986393	0.973653	0.976774	1.00562	1.0203	1.01471	1.00411	0.998002
280	chr1	176166426	176770471	0.963773	0.951325	1.00511	0.992528	1.01643	0.997802	0.959157	1.01329	1.00844	1.02071	1.05369	1.00713	1.0286	0.984226	0.972777	0.948285	0.984718	0.622632	1.05075	0.970543	0.940635	0.970057	0.984423	1.04676	0.98334	1.02357	0.940353	0.986295	0.91092	1.02788	0.996805	0.992627	0.995212	0.941011	0.955424	1.04645	0.885591	1.0002	0.986393	0.973653	0.976774	1.00562	1.0203	1.01471	1.00411	0.998002
281	chr1	176770472	177289400	0.963773	0.951325	1.00511	0.992528	1.01643	0.997802	0.959157	1.01329	1.00844	1.02071	1.05369	1.00713	1.0286	0.984226	0.972777	0.948285	0.984718	0.622632	1.05075	0.970543	0.940635	0.970057	0.984423	1.04676	0.98334	1.02357	0.940353	0.986295	0.91092	1.02788	0.996805	0.992627	0.995212	0.941011	0.955424	1.04645	0.885591	1.0002	0.986393	0.973653	0.976774	1.00562	1.0203	1.01471	1.00411	0.998002
282	chr1	177289401	177850560	0.963773	0.951325	1.00511	0.992528	1.01643	0.997802	0.959157	1.01329	1.00844	1.02071	1.05369	1.00713	1.0286	0.984226	0.972777	0.948285	0.984718	0.622632	1.05075	0.970543	0.940635	0.970057	0.984423	1.04676	0.98334	1.02357	0.940353	0.986295	0.91092	1.02788	0.996805	0.992627	0.995212	0.941011	0.955424	1.04645	0.885591	1.0002	0.986393	0.973653	0.976774	1.00562	1.0203	1.01471	1.00411	0.998002
283	chr1	177850561	178396910	0.963773	0.951325	1.00511	0.992528	1.01643	0.997802	0.959157	1.01329	1.00844	1.02071	1.05369	1.00713	1.0286	0.984226	0.972777	0.948285	0.984718	0.622632	1.05075	0.970543	0.940635	0.970057	0.984423	1.04676	0.98334	1.02357	0.940353	0.986295	0.91092	1.02788	0.996805	0.992627	0.995212	0.941011	0.955424	1.04645	0.885591	1.0002	0.986393	0.973653	0.976774	1.00562	1.0203	1.01471	1.00411	0.998002
284	chr1	178396911	178938692	0.963773	0.951325	1.00511	0.992528	1.01643	0.997802	0.959157	1.01329	1.00844	1.02071	1.05369	1.00713	1.0286	0.984226	0.972777	0.948285	0.984718	0.622632	1.05075	0.970543	0.940635	0.970057	0.984423	1.04676	0.98334	1.02357	0.940353	0.986295	0.91092	1.02788	0.996805	0.992627	0.995212	0.941011	0.955424	1.04645	0.885591	1.0002	0.986393	0.973653	0.976774	1.00562	1.0203	1.01471	1.00411	0.998002
285	chr1	178938693	179558951	0.963773	0.951325	1.00511	0.992528	1.01643	0.997802	0.959157	1.01329	1.00844	1.02071	1.05369	1.00713	1.0286	0.984226	0.972777	0.948285	0.984718	0.622632	1.05075	0.970543	0.940635	0.970057	0.984423	1.04676	0.98334	1.02357	0.940353	0.986295	0.91092	1.02788	0.996805	0.992627	0.995212	0.941011	0.955424	1.04645	0.885591	1.0002	0.986393	0.973653	0.976774	1.00562	1.0203	1.01471	1.00411	0.998002
286	chr1	179558952	180129944	0.963773	0.951325	1.00511	0.992528	1.01643	0.997802	0.959157	1.01329	1.00844	1.02071	1.05369	1.00713	1.0286	0.984226	0.972777	0.948285	0.984718	0.622632	1.05075	0.970543	0.940635	0.970057	0.984423	1.04676	0.98334	1.02357	0.940353	0.986295	0.91092	1.02788	0.996805	0.992627	0.995212	0.941011	0.955424	1.04645	0.885591	1.0002	0.986393	0.973653	0.976774	1.00562	1.0203	1.01471	1.00411	0.998002
287	chr1	180129945	180663940	0.963773	0.951325	1.00511	0.992528	1.01643	0.997802	0.959157	1.01329	1.00844	1.02071	1.05369	1.00713	1.0286	0.984226	0.972777	0.948285	0.984718	0.622632	1.05075	0.970543	0.940635	0.970057	0.984423	1.04676	0.98334	1.02357	0.940353	0.986295	0.91092	1.02788	0.996805	0.992627	0.995212	0.941011	0.955424	1.04645	0.885591	1.0002	0.986393	0.973653	0.976774	1.00562	1.0203	1.01471	1.00411	0.998002
288	chr1	180663941	181244148	0.963773	0.951325	1.00511	0.992528	1.01643	0.997802	0.959157	1.01329	1.00844	1.02071	1.05369	1.00713	1.0286	0.984226	0.972777	0.948285	0.984718	0.622632	1.05075	0.970543	0.940635	0.970057	0.984423	1.04676	0.98334	1.02357	0.940353	0.986295	0.91092	1.02788	0.996805	0.992627	0.995212	0.941011	0.955424	1.04645	0.885591	1.0002	0.986393	0.973653	0.976774	1.00562	1.0203	1.01471	1.00411	0.998002
289	chr1	181244149	181769045	0.963773	0.951325	1.00511	0.992528	1.01643	0.997802	0.959157	1.01329	1.00844	1.02071	1.05369	1.00713	1.0286	0.984226	0.972777	0.948285	0.984718	0.622632	1.05075	0.970543	0.940635	0.970057	0.984423	1.04676	0.98334	1.02357	0.940353	0.986295	0.91092	1.02788	0.996805	0.992627	0.995212	0.941011	0.955424	1.04645	0.885591	1.0002	0.986393	0.973653	0.976774	1.00562	1.0203	1.01471	1.00411	0.998002
290	chr1	181769046	182352803	0.963773	0.951325	1.00511	0.992528	1.01643	0.997802	0.959157	1.01329	1.00844	1.02071	1.05369	1.00713	1.0286	0.984226	0.972777	0.948285	0.984718	0.622632	1.05075	0.970543	0.940635	0.970057	0.984423	1.04676	0.98334	1.02357	0.940353	0.986295	0.91092	1.02788	0.996805	0.992627	0.995212	0.941011	0.955424	1.04645	0.885591	1.0002	0.986393	0.973653	0.976774	1.00562	1.0203	1.01471	1.00411	0.998002
291	chr1	182352804	182919946	0.963773	0.951325	1.00511	0.992528	1.01643	0.997802	0.959157	1.01329	1.00844	1.02071	1.05369	1.00713	1.0286	0.984226	0.972777	0.948285	0.984718	0.622632	1.05075	0.970543	0.940635	0.970057	0.984423	1.04676	0.98334	1.02357	0.940353	0.986295	0.91092	1.02788	0.996805	0.992627	0.995212	0.941011	0.955424	1.04645	0.885591	1.0002	0.986393	0.973653	0.976774	1.00562	1.0203	1.01471	1.00411	0.998002
292	chr1	182919947	183468650	0.963773	0.951325	1.00511	0.992528	1.01643	0.997802	0.959157	1.01329	1.00844	1.02071	1.05369	1.00713	1.0286	0.984226	0.972777	0.948285	0.984718	0.622632	1.05075	0.970543	0.940635	0.970057	0.984423	1.04676	0.98334	1.02357	0.940353	0.986295	0.91092	1.02788	0.996805	0.992627	0.995212	0.941011	0.955424	1.04645	0.885591	1.0002	0.986393	0.973653	0.976774	1.00562	1.0203	1.01471	1.00411	0.998002
293	chr1	183468651	183991505	0.963773	0.951325	1.00511	0.992528	1.01643	0.997802	0.959157	1.01329	1.00844	1.02071	1.05369	1.00713	1.0286	0.984226	0.972777	0.948285	0.984718	0.622632	1.05075	0.970543	0.940635	0.970057	0.984423	1.04676	0.98334	1.02357	0.940353	0.986295	0.91092	1.02788	0.996805	0.992627	0.995212	0.941011	0.955424	1.04645	0.885591	1.0002	0.986393	0.973653	0.976774	1.00562	1.0203	1.01471	1.00411	0.998002
294	chr1	183991506	184525288	0.963773	0.951325	1.00511	0.992528	1.01643	0.997802	0.959157	1.01329	1.00844	1.02071	1.05369	1.00713	1.0286	0.984226	0.972777	0.948285	0.984718	0.622632	1.05075	0.970543	0.940635	0.970057	0.984423	1.04676	0.98334	1.02357	0.940353	0.986295	0.91092	1.02788	0.996805	0.992627	0.995212	0.941011	0.955424	1.04645	0.885591	1.0002	0.986393	0.973653	0.976774	1.00562	1.0203	1.01471	1.00411	0.998002
295	chr1	184525289	185088868	0.963773	0.951325	1.00511	0.992528	1.01643	0.997802	0.959157	1.01329	1.00844	1.02071	1.05369	1.00713	1.0286	0.984226	0.972777	0.948285	0.984718	0.622632	1.05075	0.970543	0.940635	0.970057	0.984423	1.04676	0.98334	1.02357	0.940353	0.986295	0.91092	1.02788	0.996805	0.992627	0.995212	0.941011	0.955424	1.04645	0.885591	1.0002	0.986393	0.973653	0.976774	1.00562	1.0203	1.01471	1.00411	0.998002
296	chr1	185088869	185654934	0.963773	0.951325	1.00511	0.992528	1.01643	0.997802	0.959157	1.01329	1.00844	1.02071	1.05369	1.00713	1.0286	0.984226	0.972777	0.948285	0.984718	0.622632	1.05075	0.970543	0.940635	0.970057	0.984423	1.04676	0.98334	1.02357	0.940353	0.986295	0.91092	1.02788	0.996805	0.992627	0.995212	0.941011	0.955424	1.04645	0.885591	1.0002	0.986393	0.973653	0.976774	1.00562	1.0203	1.01471	1.00411	0.998002
297	chr1	185654935	186216193	0.963773	0.951325	1.00511	0.992528	1.01643	0.997802	0.959157	1.01329	1.00844	1.02071	1.05369	1.00713	1.0286	0.984226	0.972777	0.948285	0.984718	0.622632	1.05075	0.970543	0.940635	0.970057	0.984423	1.04676	0.98334	1.02357	0.940353	0.986295	0.91092	1.02788	0.996805	0.992627	0.995212	0.941011	0.955424	1.04645	0.885591	1.0002	0.986393	0.973653	0.976774	1.00562	1.0203	1.01471	1.00411	0.998002
298	chr1	186216194	186803099	0.963773	0.951325	1.00511	0.992528	1.01643	0.997802	0.959157	1.01329	1.00844	1.02071	1.05369	1.00713	1.0286	0.984226	0.972777	0.948285	0.984718	0.622632	1.05075	0.970543	0.940635	0.970057	0.984423	1.04676	0.98334	1.02357	0.940353	0.986295	0.91092	1.02788	0.996805	0.992627	0.995212	0.941011	0.955424	1.04645	0.885591	1.0002	0.986393	0.973653	0.976774	1.00562	1.0203	1.01471	1.00411	0.998002
299	chr1	186803100	187413758	0.963773	0.951325	1.00511	0.992528	1.01643	0.997802	0.959157	1.01329	1.00844	1.02071	1.05369	1.00713	1.0286	0.984226	0.972777	0.948285	0.984718	0.622632	1.05075	0.970543	0.940635	0.970057	0.984423	1.04676	0.98334	1.02357	0.940353	0.986295	0.91092	1.02788	0.996805	0.992627	0.995212	0.941011	0.955424	1.04645	0.885591	1.0002	0.986393	0.973653	0.976774	1.00562	1.0203	1.01471	1.00411	0.998002
300	chr1	187413759	188059864	0.963773	0.951325	1.00511	0.992528	1.01643	0.997802	0.959157	1.01329	1.00844	1.02071	1.05369	1.00713	1.0286	0.984226	0.972777	0.948285	0.984718	0.622632	1.05075	0.970543	0.940635	0.970057	0.984423	1.04676	0.98334	1.02357	0.940353	0.986295	0.91092	1.02788	0.996805	0.992627	0.995212	0.941011	0.955424	1.04645	0.885591	1.0002	0.986393	0.973653	0.976774	1.00562	1.0203	1.01471	1.00411	0.998002
301	chr1	188059865	188730303	0.963773	0.951325	1.00511	0.992528	1.01643	0.997802	0.959157	1.01329	1.00844	1.02071	1.05369	1.00713	1.0286	0.984226	0.972777	0.948285	0.984718	0.622632	1.05075	0.970543	0.940635	0.970057	0.984423	1.04676	0.98334	1.02357	0.940353	0.986295	0.91092	1.02788	0.996805	0.992627	0.995212	0.941011	0.955424	1.04645	0.885591	1.0002	0.986393	0.973653	0.976774	1.00562	1.0203	1.01471	1.00411	0.998002
302	chr1	188730304	189426853	0.963773	0.951325	1.00511	0.992528	1.01643	0.997802	0.959157	1.01329	1.00844	1.02071	1.05369	1.00713	1.0286	0.984226	0.972777	0.948285	0.984718	0.622632	1.05075	0.970543	0.940635	0.970057	0.984423	1.04676	0.98334	1.02357	0.940353	0.986295	0.91092	1.02788	0.996805	0.992627	0.995212	0.941011	0.955424	1.04645	0.885591	1.0002	0.986393	0.973653	0.976774	1.00562	1.0203	1.01471	1.00411	0.998002
303	chr1	189426854	190149227	0.963773	0.951325	1.00511	0.992528	1.01643	0.997802	0.959157	1.01329	1.00844	1.02071	1.05369	1.00713	1.0286	0.984226	0.972777	0.948285	0.984718	0.622632	1.05075	0.970543	0.940635	0.970057	0.984423	1.04676	0.98334	1.02357	0.940353	0.986295	0.91092	1.02788	0.996805	0.992627	0.995212	0.941011	0.955424	1.04645	0.885591	1.0002	0.986393	0.973653	0.976774	1.00562	1.0203	1.01471	1.00411	0.998002
304	chr1	190149228	190815777	0.963773	0.951325	1.00511	0.992528	1.01643	0.997802	0.959157	1.01329	1.00844	1.02071	1.05369	1.00713	1.0286	0.984226	0.972777	0.948285	0.984718	0.622632	1.05075	0.970543	0.940635	0.970057	0.984423	1.04676	0.98334	1.02357	0.940353	0.986295	0.91092	1.02788	0.996805	0.992627	0.995212	0.941011	0.955424	1.04645	1.00813	1.0002	0.986393	0.973653	0.976774	1.00562	1.0203	1.01471	1.00411	0.998002
305	chr1	190815778	191514303	0.963773	0.951325	1.00511	0.992528	1.01643	0.997802	0.959157	1.01329	1.00844	1.02071	1.05369	1.00713	1.0286	0.984226	0.972777	0.948285	0.984718	0.622632	1.05075	0.970543	0.940635	0.970057	0.984423	1.04676	0.98334	1.02357	0.940353	0.986295	0.91092	1.02788	0.996805	0.992627	0.995212	0.941011	0.955424	1.04645	1.00813	1.0002	0.986393	0.973653	0.976774	1.00562	1.0203	1.01471	1.00411	0.998002
306	chr1	191514304	192143702	0.963773	0.951325	1.00511	0.992528	1.01643	0.997802	0.959157	1.01329	1.00844	1.02071	1.05369	1.00713	1.0286	0.984226	0.972777	0.948285	0.984718	0.622632	1.05075	0.970543	0.940635	0.970057	0.984423	1.04676	0.98334	1.02357	0.940353	0.986295	0.91092	1.02788	0.996805	0.992627	0.995212	0.941011	0.955424	1.04645	1.00813	1.0002	0.986393	0.973653	0.976774	1.00562	1.0203	1.01471	1.00411	0.998002
307	chr1	192143703	192739406	0.963773	0.951325	1.00511	0.992528	1.01643	0.997802	0.959157	1.01329	1.00844	1.02071	1.05369	1.00713	1.0286	0.984226	0.972777	0.948285	0.984718	0.622632	1.05075	0.970543	0.940635	0.970057	0.984423	1.04676	0.98334	1.02357	0.940353	0.986295	0.91092	1.02788	0.996805	0.992627	0.995212	0.941011	0.955424	1.04645	1.00813	1.0002	0.986393	0.973653	0.976774	1.00562	1.0203	1.01471	1.00411	0.998002
308	chr1	192739407	193316536	0.963773	0.951325	1.00511	0.992528	1.01643	0.997802	0.959157	1.01329	1.00844	1.02071	1.05369	1.00713	1.0286	0.984226	0.972777	0.948285	0.984718	0.889407	1.05075	0.970543	0.940635	0.970057	0.984423	1.04676	0.98334	1.02357	0.940353	0.986295	0.91092	1.02788	0.996805	0.992627	0.995212	0.941011	0.955424	1.04645	1.00813	1.0002	0.986393	0.973653	0.976774	1.00562	1.0203	1.01471	1.00411	0.998002
309	chr1	193316537	193899029	0.963773	0.951325	1.00511	0.992528	1.01643	0.997802	0.959157	1.01329	1.00844	1.02071	1.05369	1.00713	1.0286	0.984226	0.972777	0.948285	0.984718	0.889407	1.05075	0.970543	0.940635	0.970057	0.984423	1.04676	0.98334	1.02357	0.940353	0.986295	0.91092	1.02788	0.996805	0.992627	0.995212	0.941011	0.955424	1.04645	1.00813	1.0002	0.986393	0.973653	0.976774	1.00562	1.0203	1.01471	1.00411	0.998002
310	chr1	193899030	194548290	0.963773	0.951325	1.00511	0.992528	1.01643	0.997802	0.959157	1.01329	1.00844	1.02071	1.05369	1.00713	1.0286	0.984226	0.972777	0.948285	0.984718	0.889407	1.05075	0.970543	0.940635	0.970057	0.984423	1.04676	0.98334	1.02357	0.940353	0.986295	0.91092	1.02788	0.996805	0.992627	0.995212	0.941011	0.955424	1.04645	1.00813	1.0002	0.986393	0.973653	0.976774	1.00562	1.0203	1.01471	1.00411	0.998002
311	chr1	194548291	195216318	0.963773	0.951325	1.00511	0.992528	1.01643	0.997802	0.959157	1.01329	1.00844	1.02071	1.05369	1.00713	1.0286	0.984226	0.972777	0.948285	0.984718	0.889407	1.05075	0.970543	0.940635	0.970057	0.984423	1.04676	0.98334	1.02357	0.940353	0.986295	0.91092	1.02788	0.996805	0.992627	0.995212	0.941011	0.955424	1.04645	1.00813	1.0002	0.986393	0.973653	0.976774	1.00562	1.0203	1.01471	1.00411	0.998002
312	chr1	195216319	195883573	0.963773	0.951325	1.00511	0.992528	1.01643	0.997802	0.959157	1.01329	1.00844	1.02071	1.05369	1.00713	1.0286	0.984226	0.972777	0.948285	0.984718	0.889407	1.05075	0.970543	0.940635	0.970057	0.984423	1.04676	0.98334	1.02357	0.940353	0.986295	0.91092	1.02788	0.996805	0.992627	0.995212	0.941011	0.955424	1.04645	1.00813	1.0002	0.986393	0.973653	0.976774	1.00562	1.0203	1.01471	1.00411	0.998002
313	chr1	195883574	196499443	0.963773	0.951325	1.00511	0.992528	1.01643	0.997802	0.959157	1.01329	1.00844	1.02071	1.05369	1.00713	1.0286	0.984226	0.972777	0.948285	0.984718	0.889407	1.05075	0.970543	0.940635	0.970057	0.984423	1.04676	0.98334	1.02357	0.940353	0.986295	0.91092	1.02788	0.996805	0.992627	0.995212	0.941011	0.955424	1.04645	1.00813	1.0002	0.986393	0.973653	0.976774	1.00562	1.0203	1.01471	1.00411	0.998002
314	chr1	196499444	197115034	0.963773	0.951325	1.00511	0.992528	1.01643	0.997802	0.959157	1.01329	1.00844	1.02071	1.05369	1.00713	1.0286	0.984226	0.972777	0.948285	0.984718	0.889407	1.05075	0.970543	0.940635	0.970057	0.984423	1.04676	0.98334	1.02357	0.940353	0.986295	0.91092	1.02788	0.996805	0.992627	0.995212	0.941011	0.955424	1.04645	1.00813	1.0002	0.986393	0.973653	0.976774	1.00562	1.0203	1.01471	1.00411	0.998002
315	chr1	197115035	197724837	0.963773	0.951325	1.00511	0.992528	1.01643	0.997802	0.959157	1.01329	1.00844	1.02071	1.05369	1.00713	1.0286	0.984226	0.972777	0.948285	0.984718	0.889407	1.05075	0.970543	0.940635	0.970057	0.984423	1.04676	0.98334	1.02357	0.940353	0.986295	0.91092	1.02788	0.996805	0.992627	0.995212	0.941011	0.955424	1.04645	1.00813	1.0002	0.986393	0.973653	0.976774	1.00562	1.0203	1.01471	1.00411	0.998002
316	chr1	197724838	198329827	0.963773	0.951325	1.00511	0.992528	1.01643	0.997802	0.959157	1.01329	1.00844	1.02071	1.05369	1.00713	1.0286	0.984226	0.972777	0.948285	0.984718	0.889407	1.05075	0.970543	0.940635	0.970057	0.984423	1.04676	0.98334	1.02357	0.940353	0.986295	0.91092	1.02788	0.996805	0.992627	0.995212	0.941011	0.955424	1.04645	1.00813	1.0002	0.986393	0.973653	0.976774	1.00562	1.0203	1.01471	1.00411	0.998002
317	chr1	198329828	198884527	0.963773	0.951325	1.00511	0.992528	1.01643	0.997802	0.959157	1.01329	1.00844	1.02071	1.05369	1.00713	1.0286	0.984226	0.972777	0.948285	0.984718	0.889407	1.05075	0.970543	0.940635	0.970057	0.984423	1.04676	0.98334	1.02357	0.940353	0.986295	0.91092	1.02788	0.996805	0.992627	0.995212	0.941011	0.955424	1.04645	1.00813	1.0002	0.986393	0.973653	0.976774	1.00562	1.0203	1.01471	1.00411	0.998002
318	chr1	198884528	199472382	0.963773	0.951325	1.00511	0.992528	1.01643	0.997802	0.959157	1.01329	1.00844	1.02071	1.05369	1.00713	1.0286	0.984226	0.972777	0.948285	0.984718	0.889407	1.05075	0.970543	0.940635	0.970057	0.984423	1.04676	0.98334	1.02357	0.940353	0.986295	0.91092	1.02788	0.996805	0.992627	0.995212	0.941011	0.955424	1.04645	1.00813	1.0002	0.986393	0.973653	0.976774	1.00562	1.0203	1.01471	1.00411	0.998002
319	chr1	199472383	200058568	0.963773	0.951325	1.00511	0.992528	1.01643	0.997802	0.959157	1.01329	1.00844	1.02071	1.05369	1.00713	1.0286	0.984226	0.972777	0.948285	0.984718	0.889407	1.05075	0.970543	0.940635	0.970057	0.984423	1.04676	0.98334	1.02357	0.940353	0.986295	0.91092	1.02788	0.996805	0.992627	0.995212	0.941011	0.955424	1.04645	1.00813	1.0002	0.986393	0.973653	0.976774	1.00562	1.0203	1.01471	1.00411	0.998002
320	chr1	200058569	200597926	0.963773	0.951325	1.00511	0.992528	1.01643	0.997802	0.959157	1.01329	1.00844	1.02071	1.05369	1.00713	1.0286	0.984226	0.972777	0.948285	0.984718	0.889407	1.05075	0.970543	0.940635	0.970057	0.984423	1.04676	0.98334	1.02357	0.940353	0.986295	0.91092	1.02788	0.996805	0.992627	0.995212	0.941011	0.955424	1.04645	1.00813	1.0002	0.986393	0.973653	0.976774	1.00562	1.0203	1.01471	1.00411	0.998002
321	chr1	200597927	201162783	0.963773	0.951325	1.00511	0.992528	1.01643	0.997802	0.959157	1.01329	1.00844	1.02071	1.05369	1.00713	1.0286	0.984226	0.972777	0.948285	0.984718	0.889407	1.05075	0.970543	0.940635	0.970057	0.984423	1.04676	0.98334	1.02357	0.940353	0.986295	0.91092	1.02788	0.996805	0.992627	0.995212	0.941011	0.955424	1.04645	1.00813	1.0002	0.986393	0.973653	0.976774	1.00562	1.0203	1.01471	1.00411	0.998002
322	chr1	201162784	201697350	0.963773	0.951325	1.00511	0.992528	1.01643	0.997802	0.959157	1.01329	1.00844	1.02071	1.05369	1.00713	1.0286	0.984226	0.972777	0.948285	0.984718	0.889407	1.05075	0.970543	0.940635	0.970057	0.984423	1.04676	0.98334	1.02357	0.940353	0.986295	0.91092	1.02788	0.996805	0.992627	0.995212	0.941011	0.955424	1.04645	1.00813	1.0002	0.986393	0.973653	0.976774	1.00562	1.0203	1.01471	1.00411	0.998002
323	chr1	201697351	202246493	0.963773	0.951325	1.00511	0.992528	1.01643	0.997802	0.959157	1.01329	1.00844	1.02071	1.05369	1.00713	1.0286	0.984226	0.972777	0.948285	0.984718	0.889407	1.05075	0.970543	0.940635	0.970057	0.984423	1.04676	0.98334	1.02357	0.940353	0.986295	0.91092	1.02788	0.996805	0.992627	0.995212	0.941011	0.955424	1.04645	1.00813	1.0002	0.986393	0.973653	0.976774	1.00562	1.0203	1.01471	1.00411	0.998002
324	chr1	202246494	202771679	0.963773	0.951325	1.00511	0.992528	1.01643	0.997802	0.959157	1.01329	1.00844	1.02071	1.05369	1.00713	1.0286	0.984226	0.972777	0.948285	0.984718	0.889407	1.05075	0.970543	0.940635	0.970057	0.984423	1.04676	0.98334	1.02357	0.940353	0.986295	0.91092	1.02788	0.996805	0.992627	0.995212	0.941011	0.955424	1.04645	1.00813	1.0002	0.986393	0.973653	0.976774	1.00562	1.0203	1.01471	1.00411	0.998002
325	chr1	202771680	203318771	0.963773	0.951325	1.00511	0.992528	1.01643	0.997802	0.959157	1.01329	1.00844	1.02071	1.05369	1.00713	1.0286	0.984226	0.972777	0.948285	0.984718	0.889407	1.05075	0.970543	0.940635	0.970057	0.984423	1.04676	0.98334	1.02357	0.940353	0.986295	0.91092	1.02788	0.996805	0.992627	0.995212	0.941011	0.955424	1.04645	1.00813	1.0002	0.986393	0.973653	0.976774	1.00562	1.0203	1.01471	1.00411	0.998002
326	chr1	203318772	203867204	0.963773	0.951325	1.00511	0.992528	1.01643	0.997802	0.959157	1.01329	1.00844	1.02071	1.05369	1.00713	1.0286	0.984226	0.972777	0.948285	0.984718	0.71177	1.05075	0.970543	0.940635	0.970057	0.984423	1.04676	0.98334	1.02357	0.940353	0.986295	0.91092	1.02788	0.996805	0.992627	0.995212	0.941011	0.955424	1.04645	1.00813	1.0002	0.986393	0.973653	0.976774	1.00562	1.0203	1.01471	1.00411	0.998002
327	chr1	203867205	204404814	0.963773	0.951325	1.00511	0.992528	1.01643	0.997802	0.959157	1.01329	1.00844	1.02071	1.05369	1.00713	1.0286	0.984226	0.972777	0.948285	0.984718	0.71177	1.05075	0.970543	0.940635	0.970057	0.984423	1.04676	0.98334	1.02357	0.940353	0.986295	0.91092	1.02788	0.996805	0.992627	0.995212	0.941011	0.955424	1.04645	1.00813	1.0002	0.986393	0.973653	0.976774	1.00562	1.0203	1.01471	1.00411	0.998002
328	chr1	204404815	204919940	0.963773	0.951325	1.00511	0.992528	1.01643	0.997802	0.959157	1.01329	1.00844	1.02071	1.05369	1.00713	1.0286	0.984226	0.972777	0.948285	0.984718	0.71177	1.05075	0.970543	0.940635	0.970057	0.984423	1.04676	0.98334	1.02357	0.940353	0.986295	0.91092	1.02788	0.996805	0.992627	0.995212	0.941011	0.955424	1.04645	1.00813	1.0002	0.986393	0.973653	0.976774	1.00562	1.0203	1.01471	1.00411	0.998002
329	chr1	204919941	205458217	0.963773	0.951325	1.00511	0.992528	1.01643	0.997802	0.959157	1.01329	1.00844	1.02071	1.05369	1.00713	1.0286	0.984226	0.972777	0.948285	0.984718	0.71177	1.05075	0.970543	0.940635	0.970057	0.984423	1.04676	0.98334	1.02357	0.940353	0.986295	0.91092	1.02788	0.996805	0.992627	0.995212	0.941011	0.955424	1.04645	1.00813	1.0002	0.986393	0.973653	0.976774	1.00562	1.0203	1.01471	1.00411	0.998002
330	chr1	205458218	206123887	0.963773	0.951325	1.00511	0.992528	1.01643	0.997802	0.959157	1.01329	1.00844	1.02071	1.05369	1.00713	1.0286	0.984226	0.972777	0.948285	0.984718	0.71177	1.05075	0.970543	0.940635	0.970057	0.984423	1.04676	0.98334	1.02357	0.940353	0.986295	0.91092	1.02788	0.996805	0.992627	0.995212	0.941011	0.955424	1.04645	1.00813	1.0002	0.986393	0.973653	0.976774	1.00562	1.0203	1.01471	1.00411	0.998002
331	chr1	206123888	206702715	0.963773	0.951325	1.00511	0.992528	1.01643	0.997802	0.959157	1.01329	1.00844	1.02071	1.05369	1.00713	1.0286	0.984226	0.972777	0.948285	0.984718	0.71177	1.05075	0.970543	0.940635	0.970057	1.08665	1.04676	0.98334	1.02357	0.940353	0.986295	0.91092	1.02788	0.996805	0.992627	0.995212	0.941011	0.955424	1.04645	1.00813	1.0002	0.986393	0.973653	0.976774	1.00562	1.0203	1.01471	1.00411	0.998002
332	chr1	206702716	207220205	0.963773	0.951325	1.00511	0.992528	1.01643	0.997802	0.959157	1.01329	1.00844	1.02071	1.05369	1.00713	1.0286	0.984226	0.972777	0.948285	0.984718	0.71177	1.05075	0.970543	0.940635	0.970057	1.08665	1.04676	0.98334	1.02357	0.940353	0.986295	0.91092	1.02788	0.996805	0.992627	0.995212	0.941011	0.955424	1.04645	1.00813	1.0002	0.986393	0.973653	0.976774	1.00562	1.0203	1.01471	1.00411	0.998002
333	chr1	207220206	207795412	0.963773	0.951325	1.00511	0.992528	1.01643	0.997802	0.959157	1.01329	1.00844	1.02071	1.05369	1.00713	1.0286	0.984226	0.972777	0.948285	0.984718	0.71177	1.05075	0.970543	0.940635	0.970057	1.08665	1.04676	0.98334	1.02357	0.940353	0.986295	0.91092	1.02788	0.996805	0.992627	0.995212	0.941011	0.955424	1.04645	1.00813	1.0002	0.986393	0.973653	0.976774	1.00562	1.0203	1.01471	1.00411	0.998002
334	chr1	207795413	208336398	0.963773	0.951325	1.00511	0.992528	1.01643	0.997802	0.959157	1.01329	1.00844	1.02071	1.05369	1.00713	1.0286	0.984226	0.972777	0.948285	0.984718	0.71177	1.05075	0.970543	0.940635	0.970057	1.08665	1.04676	0.98334	1.02357	0.940353	0.986295	0.91092	1.02788	0.996805	0.992627	0.995212	0.941011	0.955424	1.04645	1.00813	1.0002	0.986393	0.973653	0.976774	1.00562	1.0203	1.01471	1.00411	0.998002
335	chr1	208336399	208878922	0.963773	0.951325	1.00511	0.992528	1.01643	0.997802	0.959157	1.01329	1.00844	1.02071	1.05369	1.00713	1.0286	0.984226	0.972777	0.948285	0.984718	0.71177	1.05075	0.970543	0.940635	0.970057	1.08665	1.04676	0.98334	1.02357	0.940353	0.986295	0.91092	1.02788	0.996805	0.992627	0.995212	0.941011	0.955424	1.04645	1.00813	1.0002	0.986393	0.973653	0.976774	1.00562	1.0203	1.01471	1.00411	0.998002
336	chr1	208878923	209462261	0.963773	0.951325	1.00511	0.992528	1.01643	0.997802	0.959157	1.01329	1.00844	1.02071	1.05369	1.00713	1.0286	0.984226	0.972777	0.948285	0.984718	0.71177	1.05075	0.970543	0.940635	0.970057	1.08665	1.04676	0.98334	1.02357	0.940353	0.986295	0.91092	1.02788	0.996805	0.992627	0.995212	0.941011	0.955424	1.04645	1.00813	1.0002	0.986393	0.973653	0.976774	1.00562	1.0203	1.01471	1.00411	0.998002
337	chr1	209462262	209983585	0.963773	0.951325	1.00511	0.992528	1.01643	0.997802	0.959157	1.01329	1.00844	1.02071	1.05369	1.00713	1.0286	0.984226	0.972777	0.948285	0.984718	0.71177	1.05075	0.970543	0.940635	0.970057	1.08665	1.04676	0.98334	1.02357	0.940353	0.986295	0.91092	1.02788	0.996805	0.992627	0.995212	0.941011	0.955424	1.04645	1.00813	1.0002	0.986393	0.973653	0.976774	1.00562	1.0203	1.01471	1.00411	0.998002
338	chr1	209983586	210566546	0.963773	0.951325	1.00511	0.992528	1.01643	0.997802	0.959157	1.01329	1.00844	1.02071	1.05369	1.00713	1.0286	0.984226	0.972777	0.948285	0.984718	0.71177	1.05075	0.970543	0.940635	0.970057	1.08665	1.04676	0.98334	1.02357	0.940353	0.986295	0.91092	1.02788	0.996805	0.992627	0.995212	0.941011	0.955424	1.04645	1.00813	1.0002	0.986393	0.973653	0.976774	1.00562	1.0203	1.01471	1.00411	0.998002
339	chr1	210566547	211109538	0.963773	0.951325	1.00511	0.992528	1.01643	0.997802	0.959157	1.01329	1.00844	1.02071	1.05369	1.00713	1.0286	0.984226	0.972777	0.948285	0.984718	0.71177	1.05075	0.970543	0.940635	0.970057	1.08665	1.04676	0.98334	1.02357	0.940353	0.986295	0.91092	1.02788	0.996805	0.992627	0.995212	0.941011	0.955424	1.04645	1.00813	1.0002	0.986393	0.973653	0.976774	1.00562	1.0203	1.01471	1.00411	0.998002
340	chr1	211109539	211726239	0.963773	0.951325	1.00511	0.992528	1.01643	0.997802	0.959157	1.01329	1.00844	1.02071	1.05369	1.00713	1.0286	0.984226	0.972777	0.948285	0.984718	0.71177	1.05075	0.970543	0.940635	0.970057	1.08665	1.04676	0.98334	1.02357	0.940353	0.986295	0.91092	1.02788	0.996805	0.992627	0.995212	0.941011	0.955424	1.04645	1.00813	1.0002	0.986393	0.973653	0.976774	1.00562	1.0203	1.01471	1.00411	0.998002
341	chr1	211726240	212278562	0.963773	0.951325	1.00511	0.992528	1.01643	0.997802	0.959157	1.01329	1.00844	1.02071	1.05369	1.00713	1.0286	0.984226	0.972777	0.948285	0.984718	0.71177	1.05075	0.970543	0.940635	0.970057	1.08665	1.04676	0.98334	1.02357	0.940353	0.986295	0.91092	1.02788	0.996805	0.992627	0.995212	0.941011	0.955424	1.04645	1.00813	1.0002	0.986393	0.973653	0.976774	1.00562	1.0203	1.01471	1.00411	0.998002
342	chr1	212278563	212833904	0.963773	0.951325	1.00511	0.992528	1.01643	0.997802	0.959157	1.01329	1.00844	1.02071	1.05369	1.00713	1.0286	0.984226	0.972777	0.948285	0.984718	0.71177	1.05075	0.970543	0.940635	0.970057	1.08665	1.04676	0.98334	1.02357	0.940353	0.986295	0.91092	1.02788	0.996805	0.992627	0.995212	0.941011	0.955424	1.04645	1.00813	1.0002	0.986393	0.973653	0.976774	1.00562	1.0203	1.01471	1.00411	0.998002
343	chr1	212833905	213426832	0.963773	0.951325	1.00511	0.992528	1.01643	0.997802	0.959157	1.01329	1.00844	1.02071	1.05369	1.00713	1.0286	0.984226	0.972777	0.948285	0.984718	0.71177	1.05075	0.970543	0.940635	0.970057	1.08665	1.04676	0.98334	1.02357	0.940353	0.986295	0.91092	1.02788	0.996805	0.992627	0.995212	0.941011	0.955424	1.04645	1.00813	1.0002	0.986393	0.973653	0.976774	1.00562	1.0203	1.01471	1.00411	0.998002
344	chr1	213426833	213958886	0.963773	0.951325	1.00511	0.992528	1.01643	0.997802	0.959157	1.01329	1.00844	1.02071	1.05369	1.00713	1.0286	0.984226	0.972777	0.948285	0.984718	0.71177	1.05075	0.970543	0.940635	0.970057	1.08665	1.04676	0.98334	1.02357	0.940353	0.986295	0.91092	1.02788	0.996805	0.992627	0.995212	0.941011	0.955424	1.04645	1.00813	1.0002	0.986393	0.973653	0.976774	1.00562	1.0203	1.01471	1.00411	0.998002
345	chr1	213958887	214510062	0.963773	0.951325	1.00511	0.992528	1.01643	0.997802	0.959157	1.01329	1.00844	1.02071	1.05369	1.00713	1.0286	0.984226	0.972777	0.948285	0.984718	0.71177	1.05075	0.970543	0.940635	0.970057	1.08665	1.04676	0.98334	1.02357	0.940353	0.986295	0.91092	1.02788	0.996805	0.992627	0.995212	0.941011	0.955424	1.04645	1.00813	1.0002	0.986393	0.973653	0.976774	1.00562	1.0203	1.01471	1.00411	0.998002
346	chr1	214510063	215052594	0.963773	0.951325	1.00511	0.992528	1.01643	0.997802	0.959157	1.01329	1.00844	1.02071	1.05369	1.00713	1.0286	0.984226	0.972777	0.948285	0.984718	0.71177	1.05075	0.970543	0.940635	0.970057	1.08665	1.04676	0.98334	1.02357	0.940353	0.986295	0.91092	1.02788	0.996805	0.992627	0.995212	0.941011	0.955424	1.04645	1.00813	1.0002	0.986393	0.973653	0.976774	1.00562	1.0203	1.01471	1.00411	0.998002
347	chr1	215052595	215631757	0.963773	0.951325	1.00511	0.992528	1.01643	0.997802	0.959157	1.01329	1.00844	1.02071	1.05369	1.00713	1.0286	0.984226	0.972777	0.948285	0.984718	0.71177	1.05075	0.970543	0.940635	0.970057	1.08665	1.04676	0.98334	1.02357	0.940353	0.986295	0.91092	1.02788	0.996805	0.992627	0.995212	0.941011	0.955424	1.04645	1.00813	1.0002	0.986393	0.973653	0.976774	1.00562	1.0203	1.01471	1.00411	0.998002
348	chr1	215631758	216214893	0.963773	0.951325	1.00511	0.992528	1.01643	0.997802	0.959157	1.01329	1.00844	1.02071	1.05369	1.00713	1.0286	0.984226	0.972777	0.948285	0.984718	0.71177	1.05075	0.970543	0.940635	0.970057	1.08665	1.04676	0.98334	1.02357	0.940353	0.986295	0.91092	1.02788	0.996805	0.992627	0.995212	0.941011	0.955424	1.04645	1.00813	1.0002	0.986393	0.973653	0.976774	1.00562	1.0203	1.01471	1.00411	0.998002
349	chr1	216214894	216804639	0.963773	0.951325	1.00511	0.992528	1.01643	0.997802	0.959157	1.01329	1.00844	1.02071	1.05369	1.00713	1.0286	0.984226	0.972777	0.948285	0.984718	0.71177	1.05075	0.970543	0.940635	0.970057	1.08665	1.04676	0.98334	1.02357	0.940353	0.986295	0.91092	1.02788	0.996805	0.992627	0.995212	0.941011	0.955424	1.04645	1.00813	1.0002	0.986393	0.973653	0.976774	1.00562	1.0203	1.01471	1.00411	0.998002
350	chr1	216804640	217376949	0.963773	0.951325	1.00511	0.992528	1.01643	0.997802	0.959157	1.01329	1.00844	1.02071	1.05369	1.00713	1.0286	0.984226	0.972777	0.948285	0.984718	0.71177	1.05075	0.970543	0.940635	0.970057	1.08665	1.04676	0.98334	1.02357	0.940353	0.986295	0.91092	1.02788	0.996805	0.992627	0.995212	0.941011	0.955424	1.04645	1.00813	1.0002	0.986393	0.973653	0.976774	1.00562	1.0203	1.01471	1.00411	0.998002
351	chr1	217376950	217984524	0.963773	0.951325	1.00511	0.992528	1.01643	0.997802	0.959157	1.01329	1.00844	1.02071	1.05369	1.00713	1.0286	0.984226	0.972777	0.948285	0.984718	0.71177	1.05075	0.970543	0.940635	0.970057	1.08665	1.04676	0.98334	1.02357	0.940353	0.986295	0.91092	1.02788	0.996805	0.992627	0.995212	0.941011	0.955424	1.04645	1.00813	1.0002	0.986393	0.973653	0.976774	1.00562	1.0203	1.01471	1.00411	0.998002
352	chr1	217984525	218581792	0.963773	0.951325	1.00511	0.992528	1.01643	0.997802	0.959157	1.01329	1.00844	1.02071	1.05369	1.00713	1.0286	0.984226	0.972777	0.948285	0.984718	0.71177	1.05075	0.970543	0.940635	0.970057	1.08665	1.04676	0.98334	1.02357	0.940353	0.986295	0.91092	1.02788	0.996805	0.992627	0.995212	0.941011	0.955424	1.04645	1.00813	1.0002	0.986393	0.973653	0.976774	1.00562	1.0203	1.01471	1.00411	0.998002
353	chr1	218581793	219155411	0.963773	0.951325	1.00511	0.992528	1.01643	0.997802	0.959157	1.01329	1.00844	1.02071	1.05369	1.00713	1.0286	0.984226	0.972777	0.948285	0.984718	0.71177	1.05075	0.970543	0.940635	0.970057	1.08665	1.04676	0.98334	1.02357	0.940353	0.986295	0.91092	1.02788	0.996805	0.992627	0.995212	0.941011	0.955424	1.04645	1.00813	1.0002	0.986393	0.973653	0.976774	1.00562	1.0203	1.01471	1.00411	0.998002
354	chr1	219155412	219737708	0.963773	0.951325	1.00511	0.992528	1.01643	0.997802	0.959157	1.01329	1.00844	1.02071	1.05369	1.00713	1.0286	0.984226	0.972777	0.948285	0.984718	0.71177	1.05075	0.970543	0.940635	0.970057	1.08665	1.04676	0.98334	1.02357	0.940353	0.986295	0.91092	1.02788	0.996805	0.992627	0.995212	0.941011	0.955424	1.04645	1.00813	1.0002	0.986393	0.973653	0.976774	1.00562	1.0203	1.01471	1.00411	0.998002
355	chr1	219737709	220317364	0.963773	0.951325	1.00511	0.992528	1.01643	0.997802	0.959157	1.01329	1.00844	1.02071	1.05369	1.00713	1.0286	0.984226	0.972777	0.948285	0.984718	0.71177	1.05075	0.970543	0.940635	0.970057	1.08665	1.04676	0.98334	1.02357	0.940353	0.986295	0.91092	1.02788	0.996805	0.992627	0.995212	0.941011	0.955424	1.04645	1.00813	1.0002	0.986393	0.973653	0.976774	1.00562	1.0203	1.01471	1.00411	0.998002
356	chr1	220317365	220890747	0.963773	0.951325	1.00511	0.992528	1.01643	0.997802	0.959157	1.01329	1.00844	1.02071	1.05369	1.00713	1.0286	0.984226	0.972777	0.948285	0.984718	0.71177	1.05075	0.970543	0.940635	0.970057	1.08665	1.04676	0.98334	1.02357	0.940353	0.986295	0.91092	1.02788	0.996805	0.992627	0.995212	0.941011	0.955424	1.04645	1.00813	1.0002	0.986393	0.973653	0.976774	1.00562	1.0203	1.01471	1.00411	0.998002
357	chr1	220890748	221453004	0.963773	0.951325	1.00511	0.992528	1.01643	0.997802	0.959157	1.01329	1.00844	1.02071	1.05369	1.00713	1.0286	0.984226	0.972777	0.948285	0.984718	0.71177	1.05075	0.970543	0.940635	0.970057	1.08665	1.04676	0.98334	1.02357	0.940353	0.986295	0.91092	1.02788	0.996805	0.992627	0.995212	0.941011	0.955424	1.04645	1.00813	1.0002	0.986393	0.973653	0.976774	1.00562	1.0203	1.01471	1.00411	0.998002
358	chr1	221453005	222001728	0.963773	0.951325	1.00511	0.992528	1.01643	0.997802	0.959157	1.01329	1.00844	1.02071	1.05369	1.00713	1.0286	0.984226	0.972777	0.948285	0.984718	0.71177	1.05075	0.970543	0.940635	0.970057	1.08665	1.04676	0.98334	1.02357	0.940353	0.986295	0.91092	1.02788	0.996805	0.992627	0.995212	0.941011	0.955424	1.04645	1.00813	1.0002	0.986393	0.973653	0.976774	1.00562	1.0203	1.01471	1.00411	0.998002
359	chr1	222001729	222541919	0.963773	0.951325	1.00511	0.992528	1.01643	0.997802	0.959157	1.01329	1.00844	1.02071	1.05369	1.00713	1.0286	0.984226	0.972777	0.948285	0.984718	0.71177	1.05075	0.970543	0.940635	0.970057	1.08665	1.04676	0.98334	1.02357	0.940353	0.986295	0.91092	1.02788	0.996805	0.992627	0.995212	0.941011	0.955424	1.04645	1.00813	1.0002	0.986393	0.973653	0.976774	1.00562	1.0203	1.01471	1.00411	0.998002
360	chr1	222541920	223112359	0.963773	0.951325	1.00511	0.992528	1.01643	0.997802	0.959157	1.01329	1.00844	1.02071	1.05369	1.00713	1.0286	0.984226	0.972777	0.948285	0.984718	0.71177	1.05075	0.970543	0.940635	0.970057	1.08665	1.04676	0.98334	1.02357	0.940353	0.986295	0.91092	1.02788	0.996805	0.992627	0.995212	0.941011	0.955424	1.04645	1.00813	1.0002	0.986393	0.973653	0.976774	1.00562	1.0203	1.01471	1.00411	0.998002
361	chr1	223112360	223663742	0.963773	0.951325	1.00511	0.992528	1.01643	0.997802	0.959157	1.01329	1.00844	1.02071	1.05369	1.00713	1.0286	0.984226	0.972777	0.948285	0.984718	0.71177	1.05075	0.970543	0.940635	0.970057	1.08665	1.04676	0.98334	1.02357	0.940353	0.986295	0.91092	1.02788	0.996805	0.992627	0.995212	0.941011	0.955424	1.04645	1.00813	1.0002	0.986393	0.973653	0.976774	1.00562	1.0203	1.01471	1.00411	0.998002
362	chr1	223663743	224227255	0.963773	0.951325	1.00511	0.992528	1.01643	0.997802	0.959157	1.01329	1.00844	1.02071	1.05369	1.00713	1.0286	0.984226	0.972777	0.948285	0.984718	0.71177	1.05075	0.970543	0.940635	0.970057	1.08665	1.04676	0.98334	1.02357	0.940353	0.986295	0.91092	1.02788	0.996805	0.992627	0.995212	0.941011	0.955424	1.04645	1.00813	1.0002	0.986393	0.973653	0.976774	1.00562	1.0203	1.01471	1.00411	0.998002
363	chr1	224227256	224789690	0.963773	0.951325	1.00511	0.992528	1.01643	0.997802	0.959157	1.01329	1.00844	1.02071	1.05369	1.00713	1.0286	0.984226	0.972777	0.948285	0.984718	0.71177	1.05075	0.970543	0.940635	0.970057	1.08665	1.04676	0.98334	1.02357	0.940353	0.986295	0.91092	1.02788	0.996805	0.992627	0.995212	0.941011	0.955424	1.04645	1.00813	1.0002	0.986393	0.973653	0.976774	1.00562	1.0203	1.01471	1.00411	0.998002
364	chr1	224789691	225354268	0.963773	0.951325	1.00511	0.992528	1.01643	0.997802	0.959157	1.01329	1.00844	1.02071	1.05369	1.00713	1.0286	0.984226	0.972777	0.948285	0.984718	0.71177	1.05075	0.970543	0.940635	0.970057	1.08665	1.04676	0.98334	1.02357	0.940353	0.986295	0.91092	1.02788	0.996805	0.992627	0.995212	0.941011	0.955424	1.04645	1.00813	1.0002	0.986393	0.973653	0.976774	1.00562	1.0203	1.01471	1.00411	0.998002
365	chr1	225354269	225943339	0.963773	0.951325	1.00511	0.992528	1.01643	0.997802	0.959157	1.01329	1.00844	1.02071	1.05369	1.00713	1.0286	0.984226	0.972777	0.948285	0.984718	0.71177	1.05075	0.970543	0.940635	0.970057	1.08665	1.04676	0.98334	1.02357	0.940353	0.986295	0.91092	1.02788	0.996805	0.992627	0.995212	0.941011	0.955424	1.04645	1.00813	1.0002	0.986393	0.973653	0.976774	1.00562	1.0203	1.01471	1.00411	0.998002
366	chr1	225943340	226516852	0.963773	0.951325	1.00511	0.992528	1.01643	0.997802	0.959157	1.01329	1.00844	1.02071	1.05369	1.00713	1.0286	0.984226	0.972777	0.948285	0.984718	0.71177	1.05075	0.970543	0.940635	0.970057	1.08665	1.04676	0.98334	1.02357	0.940353	0.986295	0.91092	1.02788	0.996805	0.992627	0.995212	0.941011	0.955424	1.04645	1.00813	1.0002	0.986393	0.973653	0.976774	1.00562	1.0203	1.01471	1.00411	0.998002
367	chr1	226516853	227034810	0.963773	0.951325	1.00511	0.992528	1.01643	0.997802	0.959157	1.01329	1.00844	1.02071	1.05369	1.00713	1.0286	0.984226	0.972777	0.948285	0.984718	0.928207	1.05075	0.970543	0.940635	0.970057	1.08665	1.04676	0.98334	1.02357	0.940353	0.986295	0.91092	1.02788	0.996805	0.992627	0.995212	0.941011	0.955424	1.04645	1.00813	1.0002	0.986393	0.973653	0.976774	1.00562	1.0203	1.01471	1.00411	0.998002
368	chr1	227034811	227634271	0.963773	0.951325	1.00511	0.992528	1.01643	0.997802	0.959157	1.01329	1.00844	1.02071	1.05369	1.00713	1.0286	0.984226	0.972777	0.948285	0.984718	0.928207	1.05075	0.970543	0.940635	0.970057	1.08665	1.04676	0.98334	1.02357	0.940353	0.986295	0.91092	1.02788	0.996805	0.992627	0.995212	0.941011	0.955424	1.04645	1.00813	1.0002	0.986393	0.973653	0.976774	1.00562	1.0203	1.01471	1.00411	0.998002
369	chr1	227634272	228242139	0.963773	0.951325	1.00511	0.992528	1.01643	0.997802	0.959157	1.01329	1.00844	1.02071	1.05369	1.00713	1.0286	0.984226	0.972777	0.948285	0.984718	0.928207	1.05075	0.970543	0.940635	0.970057	1.08665	1.04676	0.98334	1.02357	0.940353	0.986295	0.91092	1.02788	0.996805	0.992627	0.995212	0.941011	0.955424	1.04645	1.00813	1.0002	0.986393	0.973653	0.976774	1.00562	1.0203	1.01471	1.00411	0.998002
370	chr1	228242140	228882840	0.963773	0.951325	1.00511	0.992528	1.01643	0.997802	0.959157	1.01329	1.00844	1.02071	1.05369	1.00713	1.0286	0.984226	0.972777	0.948285	0.984718	0.928207	1.05075	0.970543	0.940635	0.970057	1.08665	1.04676	0.98334	1.02357	0.940353	0.986295	0.91092	1.02788	0.996805	0.992627	0.995212	0.941011	0.955424	1.04645	1.00813	1.0002	0.986393	0.973653	0.976774	1.00562	1.0203	1.01471	1.00411	0.998002
371	chr1	228882841	229390362	0.963773	0.951325	1.00511	0.992528	1.01643	0.997802	0.959157	1.01329	1.00844	1.02071	1.05369	1.00713	1.0286	0.984226	0.972777	0.948285	0.984718	0.928207	1.05075	0.970543	0.940635	0.970057	1.08665	1.04676	0.98334	1.02357	0.940353	0.986295	0.91092	1.02788	0.996805	0.992627	0.995212	0.941011	0.955424	1.04645	1.00813	1.0002	0.986393	0.973653	0.976774	1.00562	1.0203	1.01471	1.00411	0.998002
372	chr1	229390363	229969357	0.963773	0.951325	1.00511	0.992528	1.01643	0.997802	0.959157	1.01329	1.00844	1.02071	1.05369	1.00713	1.0286	0.984226	0.972777	0.948285	0.984718	0.928207	1.05075	0.970543	0.940635	0.970057	1.08665	1.04676	0.98334	1.02357	0.940353	0.986295	0.91092	1.02788	0.996805	0.992627	0.995212	0.941011	0.955424	1.04645	1.00813	1.0002	0.986393	0.973653	0.976774	1.00562	1.0203	1.01471	1.00411	0.998002
373	chr1	229969358	230506526	0.963773	0.951325	1.00511	0.992528	1.01643	0.997802	0.959157	1.01329	1.00844	1.02071	1.05369	1.00713	1.0286	0.984226	0.972777	0.948285	0.984718	0.928207	1.05075	0.970543	0.940635	0.970057	1.08665	1.04676	0.98334	1.02357	0.940353	0.986295	0.91092	1.02788	0.996805	0.992627	0.995212	0.941011	0.955424	1.04645	1.00813	1.0002	0.986393	0.973653	0.976774	1.00562	1.0203	1.01471	1.00411	0.998002
374	chr1	230506527	231039051	0.963773	0.951325	1.00511	0.992528	1.01643	0.997802	0.959157	1.01329	1.00844	1.02071	1.05369	1.00713	1.0286	0.984226	0.972777	0.948285	0.984718	0.928207	1.05075	0.970543	0.940635	0.970057	1.08665	1.04676	0.98334	1.02357	0.940353	0.986295	0.91092	1.02788	0.996805	0.992627	0.995212	0.941011	0.955424	1.04645	1.00813	1.0002	0.986393	0.973653	0.976774	1.00562	1.0203	1.01471	1.00411	0.998002
375	chr1	231039052	231603731	0.963773	0.951325	1.00511	0.992528	1.01643	0.997802	0.959157	1.01329	1.00844	1.02071	1.05369	1.00713	1.0286	0.984226	0.972777	0.948285	0.984718	0.928207	1.05075	0.970543	0.940635	0.970057	1.08665	1.04676	0.98334	1.02357	0.940353	0.986295	0.91092	1.02788	0.996805	0.992627	0.995212	0.941011	0.955424	1.04645	1.00813	1.0002	0.986393	0.973653	0.976774	1.00562	1.0203	1.01471	1.00411	0.998002
376	chr1	231603732	232158879	0.963773	0.951325	1.00511	0.992528	1.01643	0.997802	0.959157	1.01329	1.00844	1.02071	1.05369	1.00713	1.0286	0.984226	0.972777	1.07853	0.984718	0.928207	1.05075	0.970543	0.940635	0.970057	1.08665	1.04676	0.98334	1.02357	0.940353	0.986295	0.91092	1.02788	0.996805	0.992627	0.995212	0.941011	0.955424	1.04645	1.00813	1.0002	0.986393	0.973653	0.976774	1.00562	1.0203	1.01471	1.00411	0.998002
377	chr1	232158880	232716385	0.963773	0.951325	1.00511	0.992528	1.01643	0.997802	0.959157	1.01329	1.00844	1.02071	1.05369	1.00713	1.0286	0.984226	0.972777	1.07853	0.984718	0.928207	1.05075	0.970543	0.940635	0.970057	1.08665	1.04676	0.98334	1.02357	0.940353	0.986295	0.91092	1.02788	0.996805	0.992627	0.995212	0.941011	0.955424	1.04645	1.00813	1.0002	0.986393	0.973653	0.976774	1.00562	1.0203	1.01471	1.00411	0.998002
378	chr1	232716386	233273096	0.963773	0.951325	1.00511	0.992528	1.01643	0.997802	0.959157	1.01329	1.00844	1.02071	1.05369	1.00713	1.0286	0.984226	0.972777	1.07853	0.984718	0.928207	1.05075	0.970543	0.940635	0.970057	1.08665	1.04676	0.98334	1.02357	0.940353	0.986295	0.91092	1.02788	0.996805	0.992627	0.995212	0.941011	0.955424	1.04645	1.00813	1.0002	0.986393	0.973653	0.976774	1.00562	1.0203	1.01471	1.00411	0.998002
379	chr1	233273097	233847521	0.963773	0.951325	1.00511	0.992528	1.01643	0.997802	0.959157	1.01329	1.00844	1.02071	1.05369	1.00713	1.0286	0.984226	0.972777	1.07853	0.984718	0.928207	1.05075	0.970543	0.940635	0.970057	1.08665	1.04676	0.98334	1.02357	0.940353	0.986295	0.91092	1.02788	0.996805	0.992627	0.995212	0.941011	0.955424	1.04645	1.00813	1.0002	0.986393	0.973653	0.976774	1.00562	1.0203	1.01471	1.00411	0.998002
380	chr1	233847522	234447779	0.963773	0.951325	1.00511	0.992528	1.01643	0.997802	0.959157	1.01329	1.00844	1.02071	1.05369	1.00713	1.0286	0.984226	0.972777	1.07853	0.984718	0.928207	1.05075	0.970543	0.940635	0.970057	1.08665	1.04676	0.98334	1.02357	0.940353	0.986295	0.91092	1.02788	0.996805	0.992627	0.995212	0.941011	0.955424	1.04645	1.00813	1.0002	0.986393	0.973653	0.976774	1.00562	1.0203	1.01471	1.00411	0.998002
381	chr1	234447780	234947533	0.963773	0.951325	1.00511	0.992528	1.01643	0.997802	0.959157	1.01329	1.00844	1.02071	1.05369	1.00713	1.0286	0.984226	0.972777	1.07853	0.984718	0.928207	1.05075	0.970543	0.940635	0.970057	1.08665	1.04676	0.98334	1.02357	0.940353	0.986295	0.91092	1.02788	0.996805	0.992627	0.995212	0.941011	0.955424	1.04645	1.00813	1.0002	0.986393	0.973653	0.976774	1.00562	1.0203	1.01471	1.00411	0.998002
382	chr1	234947534	235557147	0.963773	0.951325	1.00511	0.992528	1.01643	0.997802	0.959157	1.01329	1.00844	1.02071	1.05369	1.00713	1.0286	0.984226	0.972777	1.07853	0.984718	0.928207	1.05075	0.970543	0.940635	0.970057	1.08665	1.04676	0.98334	1.02357	0.940353	0.986295	0.91092	1.02788	0.996805	0.992627	0.995212	0.941011	0.955424	1.04645	1.00813	1.0002	0.986393	0.973653	0.976774	1.00562	1.0203	1.01471	1.00411	0.998002
383	chr1	235557148	236131394	0.963773	0.951325	1.00511	0.992528	1.01643	0.997802	0.959157	1.01329	1.00844	1.02071	1.05369	1.00713	1.0286	0.984226	0.972777	1.07853	0.984718	0.928207	1.05075	0.970543	0.940635	0.970057	1.08665	1.04676	0.98334	1.02357	0.940353	0.986295	0.91092	1.02788	0.996805	0.992627	0.995212	0.941011	0.955424	1.04645	1.00813	1.0002	0.986393	0.973653	0.976774	1.00562	1.0203	1.01471	1.00411	0.998002
384	chr1	236131395	236720309	0.963773	0.951325	1.00511	0.992528	1.01643	0.997802	0.959157	1.01329	1.00844	1.02071	1.05369	1.00713	1.0286	0.984226	0.972777	1.07853	0.984718	0.928207	1.05075	0.970543	0.940635	0.970057	1.08665	1.04676	0.98334	1.02357	0.940353	0.986295	0.91092	1.02788	0.996805	0.992627	0.995212	0.941011	0.955424	1.04645	1.00813	1.0002	0.986393	0.973653	0.976774	1.00562	1.0203	1.01471	1.00411	0.998002
385	chr1	236720310	237322870	0.963773	0.951325	1.00511	0.992528	1.01643	0.997802	0.959157	1.01329	1.00844	1.02071	1.05369	1.00713	1.0286	0.984226	0.972777	1.07853	0.984718	0.928207	1.05075	0.970543	0.940635	0.970057	1.08665	1.04676	0.98334	1.02357	0.940353	0.986295	0.91092	1.02788	0.996805	0.992627	0.995212	0.941011	0.955424	1.04645	1.00813	1.0002	0.986393	0.973653	0.976774	1.00562	1.0203	1.01471	1.00411	0.998002
386	chr1	237322871	237940378	0.963773	0.951325	1.00511	0.992528	1.01643	0.997802	0.959157	1.01329	1.00844	1.02071	1.05369	1.00713	1.0286	0.984226	0.972777	1.07853	0.984718	0.928207	1.05075	0.970543	0.940635	0.970057	1.08665	1.04676	0.98334	1.02357	0.940353	0.986295	0.91092	1.02788	0.996805	0.992627	0.995212	0.941011	0.955424	1.04645	1.00813	1.0002	0.986393	0.973653	0.976774	1.00562	1.0203	1.01471	1.00411	0.998002
387	chr1	237940379	238535865	0.963773	0.951325	1.00511	0.992528	1.01643	0.997802	0.959157	1.01329	1.00844	1.02071	1.05369	1.00713	1.0286	0.984226	0.972777	1.07853	0.984718	0.928207	1.05075	0.970543	0.940635	0.970057	1.08665	1.04676	0.98334	1.02357	0.940353	0.986295	0.91092	1.02788	0.996805	0.992627	0.995212	0.941011	0.955424	1.04645	1.00813	1.0002	0.986393	0.973653	0.976774	1.00562	1.0203	1.01471	1.00411	0.998002
388	chr1	238535866	239158283	0.963773	0.951325	1.00511	0.992528	1.01643	0.997802	0.959157	1.01329	1.00844	1.02071	1.05369	1.00713	1.0286	0.984226	0.972777	1.07853	0.984718	0.928207	1.05075	0.970543	0.940635	0.970057	1.08665	1.04676	0.98334	1.02357	0.940353	0.986295	0.91092	1.02788	0.996805	0.992627	0.995212	0.941011	0.955424	1.04645	1.00813	1.0002	0.986393	0.973653	0.976774	1.00562	1.0203	1.01471	1.00411	0.998002
389	chr1	239158284	239731159	0.963773	0.951325	1.00511	0.992528	1.01643	0.997802	0.959157	1.01329	1.00844	1.02071	1.05369	1.00713	1.0286	0.984226	0.972777	1.07853	0.984718	0.928207	1.05075	0.970543	0.940635	0.970057	1.08665	1.04676	0.98334	1.02357	0.940353	0.986295	0.91092	1.02788	0.996805	0.992627	0.995212	0.941011	0.955424	1.04645	1.00813	1.0002	0.986393	0.973653	0.976774	1.00562	1.0203	1.01471	1.00411	0.998002
390	chr1	239731160	240309818	0.963773	0.951325	1.00511	0.992528	1.01643	0.997802	0.959157	1.01329	1.00844	1.02071	1.05369	1.00713	1.0286	0.984226	0.972777	1.07853	0.984718	0.928207	1.05075	0.970543	0.940635	0.970057	1.08665	1.04676	0.98334	1.02357	0.940353	0.986295	0.91092	1.02788	0.996805	0.992627	0.995212	0.941011	0.955424	1.04645	1.00813	1.0002	0.986393	0.973653	0.976774	1.00562	1.0203	1.01471	1.00411	0.998002
391	chr1	240309819	240865619	0.963773	0.951325	1.00511	0.992528	1.01643	0.997802	0.959157	1.01329	1.00844	1.02071	1.05369	1.00713	1.0286	0.984226	0.972777	1.07853	0.984718	0.928207	1.05075	0.970543	0.940635	0.970057	1.08665	1.04676	0.98334	1.02357	0.940353	0.986295	0.91092	1.02788	0.996805	0.992627	0.995212	0.941011	0.955424	1.04645	1.00813	1.0002	0.986393	0.973653	0.976774	1.00562	1.0203	1.01471	1.00411	0.998002
392	chr1	240865620	241446557	0.963773	0.951325	1.00511	0.992528	1.01643	0.997802	0.959157	1.01329	1.00844	1.02071	1.05369	1.00713	1.0286	0.984226	0.972777	1.07853	0.984718	0.928207	1.05075	0.970543	0.940635	0.970057	1.08665	1.04676	0.98334	1.02357	0.940353	0.986295	0.91092	1.02788	0.996805	0.992627	0.995212	0.941011	0.955424	1.04645	1.00813	1.0002	0.986393	0.973653	0.976774	1.00562	1.0203	1.01471	1.00411	0.998002
393	chr1	241446558	242053590	0.963773	0.951325	1.00511	0.992528	1.01643	0.997802	0.959157	1.01329	1.00844	1.02071	1.05369	1.00713	1.0286	0.984226	0.972777	1.07853	0.984718	0.928207	1.05075	0.970543	0.940635	0.970057	1.08665	1.04676	0.98334	1.02357	0.940353	0.986295	0.91092	1.02788	0.996805	0.992627	0.995212	0.941011	0.955424	1.04645	1.00813	1.0002	0.986393	0.973653	0.976774	1.00562	1.0203	1.01471	1.00411	0.998002
394	chr1	242053591	242637973	0.963773	0.951325	1.00511	0.992528	1.01643	0.997802	0.959157	1.01329	1.00844	1.02071	1.05369	1.00713	1.0286	0.984226	0.972777	1.07853	0.984718	0.928207	1.05075	0.970543	0.940635	0.970057	1.08665	1.04676	0.98334	1.02357	0.940353	0.986295	0.91092	1.02788	0.996805	0.992627	0.995212	0.941011	0.955424	1.04645	1.00813	1.0002	0.986393	0.973653	0.976774	1.00562	1.0203	1.01471	1.00411	0.998002
395	chr1	242637974	243226390	0.963773	0.951325	1.00511	0.992528	1.01643	0.997802	0.959157	1.01329	1.00844	1.02071	1.05369	1.00713	1.0286	0.984226	0.972777	1.07853	0.984718	0.928207	1.05075	0.970543	0.940635	0.970057	1.08665	1.04676	0.98334	1.02357	0.940353	0.986295	0.91092	1.02788	0.996805	0.992627	0.995212	0.941011	0.955424	1.04645	1.00813	1.0002	0.986393	0.973653	0.976774	1.00562	1.0203	1.01471	1.00411	0.998002
396	chr1	243226391	243804672	0.963773	0.951325	1.00511	0.992528	1.01643	0.997802	0.959157	1.01329	1.00844	1.02071	1.05369	1.00713	1.0286	0.984226	0.972777	1.07853	0.984718	0.928207	1.05075	0.970543	0.940635	0.970057	1.08665	1.04676	0.98334	1.02357	0.940353	0.986295	0.91092	1.02788	0.996805	0.992627	0.995212	0.941011	0.955424	1.04645	1.00813	1.0002	0.986393	0.973653	0.976774	1.00562	1.0203	1.01471	1.00411	0.998002
397	chr1	243804673	244341875	0.963773	0.951325	1.00511	0.992528	1.01643	0.997802	0.959157	1.01329	1.00844	1.02071	1.05369	1.00713	1.0286	0.984226	0.972777	1.07853	0.984718	0.928207	1.05075	0.970543	0.940635	0.970057	1.08665	1.04676	0.98334	1.02357	0.940353	0.986295	0.91092	1.02788	0.996805	0.992627	0.995212	0.941011	0.955424	1.04645	1.00813	1.0002	0.986393	0.973653	0.976774	1.00562	1.0203	1.01471	1.00411	0.998002
398	chr1	244341876	244911556	0.963773	0.951325	1.00511	0.992528	1.01643	0.997802	0.959157	1.01329	1.00844	1.02071	1.05369	1.00713	1.0286	0.984226	0.972777	1.07853	0.984718	0.928207	1.05075	0.970543	0.940635	0.970057	1.08665	1.04676	0.98334	1.02357	0.940353	0.986295	0.91092	1.02788	0.996805	0.992627	0.995212	0.941011	0.955424	1.04645	1.00813	1.0002	0.986393	0.973653	0.976774	1.00562	1.0203	1.01471	1.00411	0.998002
399	chr1	244911557	245474238	0.963773	0.951325	1.00511	0.992528	1.01643	0.997802	0.959157	1.01329	1.00844	1.02071	1.05369	1.00713	1.0286	0.984226	0.972777	1.07853	0.984718	0.928207	1.05075	0.970543	0.940635	0.970057	1.08665	1.04676	0.98334	1.02357	0.940353	0.986295	0.91092	1.02788	0.996805	0.992627	0.995212	0.941011	0.955424	1.04645	1.00813	1.0002	0.986393	0.973653	0.976774	1.00562	1.0203	1.01471	1.00411	0.998002
400	chr1	245474239	246008178	0.963773	0.951325	1.00511	0.992528	1.01643	0.997802	0.959157	1.01329	1.00844	1.02071	1.05369	1.00713	1.0286	0.984226	0.972777	1.07853	0.984718	0.928207	1.05075	0.970543	0.940635	0.970057	1.08665	1.04676	0.98334	1.02357	0.940353	0.986295	0.91092	1.02788	0.996805	0.992627	0.995212	0.941011	0.955424	1.04645	1.00813	1.0002	0.986393	0.973653	0.976774	1.00562	1.0203	1.01471	1.00411	0.998002
401	chr1	246008179	246599075	0.963773	0.951325	1.00511	0.992528	1.01643	0.997802	0.959157	1.01329	1.00844	1.02071	1.05369	1.00713	1.0286	0.984226	0.972777	1.07853	0.984718	0.928207	1.05075	0.970543	0.940635	0.970057	1.08665	1.04676	0.98334	1.02357	0.940353	0.986295	0.91092	1.02788	0.996805	0.992627	0.995212	0.941011	0.955424	1.04645	1.00813	1.0002	0.986393	0.973653	0.976774	1.00562	1.0203	1.01471	1.00411	0.998002
402	chr1	246599076	247213117	0.963773	0.951325	1.00511	0.992528	1.01643	0.997802	0.959157	1.01329	1.00844	1.02071	1.05369	1.00713	1.0286	0.984226	0.972777	1.07853	0.984718	0.928207	1.05075	0.970543	0.940635	0.970057	1.08665	1.04676	0.98334	1.02357	0.940353	0.986295	0.91092	1.02788	0.996805	0.992627	0.995212	0.941011	0.955424	1.04645	1.00813	1.0002	0.986393	0.973653	0.976774	1.00562	1.0203	1.01471	1.00411	0.998002
403	chr1	247213118	247831991	0.963773	0.951325	1.00511	0.992528	1.01643	0.997802	0.959157	1.01329	1.00844	1.02071	1.05369	1.00713	1.0286	0.984226	0.972777	1.07853	0.984718	0.928207	1.05075	0.970543	0.940635	0.970057	1.08665	1.04676	0.98334	1.02357	0.940353	0.986295	0.91092	1.02788	0.996805	0.992627	0.995212	0.941011	0.955424	1.04645	1.00813	1.0002	0.986393	0.973653	0.976774	1.00562	1.0203	1.01471	1.00411	0.998002
404	chr1	247831992	248517881	0.963773	0.951325	1.00511	0.992528	1.01643	0.997802	0.959157	1.01329	1.00844	1.02071	1.05369	1.00713	1.0286	0.984226	0.972777	1.07853	0.984718	0.928207	1.05075	0.970543	0.940635	0.970057	1.08665	1.04676	0.98334	1.02357	0.940353	0.986295	0.91092	1.02788	0.996805	0.992627	0.995212	0.941011	0.955424	1.04645	1.00813	1.0002	0.986393	0.973653	0.976774	1.00562	1.0203	1.01471	1.00411	0.998002
405	chr1	248517882	249250621	0.963773	0.951325	1.00511	0.992528	1.01643	0.997802	0.959157	1.01329	1.00844	1.02071	1.05369	1.00713	1.0286	0.984226	0.972777	1.07853	0.984718	0.928207	1.05075	0.970543	0.940635	0.970057	1.08665	1.04676	0.98334	1.02357	0.940353	0.986295	0.91092	1.02788	0.996805	0.992627	0.995212	0.941011	0.955424	1.04645	1.00813	1.0002	0.986393	0.973653	0.976774	1.00562	1.0203	1.01471	1.00411	0.998002
406	chr2	1	623315	0.963773	0.951325	1.00511	0.992528	1.01643	0.997802	0.959157	1.01329	1.00844	1.02071	1.05369	1.00713	1.0286	0.984226	0.972777	1.07853	0.984718	0.928207	1.05075	0.970543	0.940635	0.970057	1.08665	1.04676	0.98334	1.02357	0.940353	0.986295	0.91092	1.02788	0.996805	0.992627	0.995212	0.941011	0.955424	1.04645	1.00813	1.0002	0.986393	0.973653	0.976774	1.00562	1.0203	1.01471	1.00411	0.998002
407	chr2	623316	1291916	0.955137	1.03252	0.936318	0.980493	1.01116	0.997802	1.0144	1.00421	0.979513	1.01116	0.959445	0.94535	1.01511	0.990545	0.99372	1.00904	0.980689	0.949899	0.977165	1.05096	0.986492	1.00854	1.03438	0.959829	0.988566	0.967539	1.1378	0.99551	1.02357	1.01086	1.01157	0.980297	1.01227	1.05359	0.979611	1.04938	1.01776	1.04206	0.918788	1.01258	1.02204	1.0143	0.99223	0.966765	0.99233	1.01521
408	chr2	1291917	1889431	0.955137	1.03252	0.936318	0.980493	1.01116	0.997802	1.0144	1.00421	0.979513	1.01116	0.959445	0.94535	1.01511	0.990545	0.99372	1.00904	0.980689	0.949899	0.977165	1.05096	0.986492	1.00854	1.03438	0.959829	0.988566	0.967539	1.1378	0.99551	1.02357	1.01086	1.01157	0.980297	1.01227	1.05359	0.979611	1.04938	1.01776	1.04206	0.918788	1.01258	1.02204	1.0143	0.99223	0.966765	0.99233	1.01521
409	chr2	1889432	2478691	0.955137	1.03252	0.936318	0.980493	1.01116	0.997802	1.0144	1.00421	0.979513	1.01116	0.959445	0.94535	1.01511	0.990545	0.99372	1.00904	0.980689	0.949899	0.977165	1.05096	0.986492	1.00854	1.03438	0.959829	0.988566	0.967539	1.1378	0.99551	1.02357	1.01086	1.01157	0.980297	1.01227	1.05359	0.979611	1.04938	1.01776	1.04206	0.918788	1.01258	1.02204	1.0143	0.99223	0.966765	0.99233	1.01521
410	chr2	2478692	3080026	0.955137	1.03252	0.936318	0.980493	1.01116	0.997802	1.0144	1.00421	0.979513	1.01116	0.959445	0.94535	1.01511	0.990545	0.99372	1.00904	0.980689	0.949899	0.977165	1.05096	0.986492	1.00854	1.03438	0.959829	0.988566	0.967539	1.1378	0.99551	1.02357	1.01086	1.01157	0.980297	1.01227	1.05359	0.979611	1.04938	1.01776	1.04206	0.918788	1.01258	1.02204	1.0143	0.99223	0.966765	0.99233	1.01521
411	chr2	3080027	3725057	0.955137	1.03252	0.936318	0.980493	1.01116	0.997802	1.0144	1.00421	0.979513	1.01116	0.959445	0.94535	1.01511	0.990545	0.99372	1.00904	0.980689	0.949899	0.977165	1.05096	0.986492	1.00854	1.03438	0.959829	0.988566	0.967539	1.1378	0.99551	1.02357	1.01086	1.01157	0.980297	1.01227	1.05359	0.979611	1.04938	1.01776	1.04206	0.918788	1.01258	1.02204	1.0143	0.99223	0.966765	0.99233	1.01521
412	chr2	3725058	4332267	0.955137	1.03252	0.936318	0.980493	1.01116	0.997802	1.0144	1.00421	0.979513	1.01116	0.959445	0.94535	1.01511	0.990545	0.99372	1.00904	0.980689	0.949899	0.977165	1.05096	0.986492	1.00854	1.03438	0.959829	0.988566	0.967539	1.1378	0.99551	1.02357	1.01086	1.01157	0.980297	1.01227	1.05359	0.979611	1.04938	1.01776	1.04206	0.918788	1.01258	1.02204	1.0143	0.99223	0.966765	0.99233	1.01521
413	chr2	4332268	4937378	0.955137	1.03252	0.936318	0.980493	1.01116	0.997802	1.0144	1.00421	0.979513	1.01116	0.959445	0.94535	1.01511	0.990545	0.99372	1.00904	0.980689	0.949899	0.977165	1.05096	0.986492	1.00854	1.03438	0.959829	0.988566	0.967539	1.1378	0.99551	1.02357	1.01086	1.01157	0.980297	1.01227	1.05359	0.979611	1.04938	1.01776	1.04206	0.918788	1.01258	1.02204	1.0143	0.99223	0.966765	0.99233	1.01521
414	chr2	4937379	5660150	0.955137	1.03252	0.936318	0.980493	1.01116	0.997802	1.0144	1.00421	0.979513	1.01116	0.959445	0.94535	1.01511	0.990545	0.99372	1.00904	0.980689	0.949899	0.977165	1.05096	0.986492	1.00854	1.03438	0.959829	0.988566	0.967539	1.1378	0.99551	1.02357	1.01086	1.01157	0.980297	1.01227	1.05359	0.979611	1.04938	1.01776	1.04206	0.918788	1.01258	1.02204	1.0143	0.99223	0.966765	0.99233	1.01521
415	chr2	5660151	6249081	0.955137	1.03252	0.936318	0.980493	1.01116	0.997802	1.0144	1.00421	0.979513	1.01116	0.959445	0.94535	1.01511	0.990545	0.99372	1.00904	0.980689	0.949899	0.977165	1.05096	0.986492	1.00854	1.03438	0.959829	0.988566	0.967539	1.1378	0.99551	1.02357	1.01086	1.01157	0.980297	1.01227	1.05359	0.979611	1.04938	1.01776	1.04206	0.918788	1.01258	1.02204	1.0143	0.99223	0.966765	0.99233	1.01521
416	chr2	6249082	6846145	0.955137	1.03252	0.936318	0.980493	1.01116	0.997802	1.0144	1.00421	0.979513	1.01116	0.959445	0.94535	1.01511	0.990545	0.99372	1.00904	0.980689	0.949899	0.977165	1.05096	0.986492	1.00854	1.03438	0.959829	0.988566	0.967539	1.1378	0.99551	1.02357	1.01086	1.01157	0.980297	1.01227	1.05359	0.979611	1.04938	1.01776	1.04206	0.918788	1.01258	1.02204	1.0143	0.99223	0.966765	0.99233	1.01521
417	chr2	6846146	7403442	0.955137	1.03252	0.936318	0.980493	1.01116	0.997802	1.0144	1.00421	0.979513	1.01116	0.959445	0.94535	1.01511	0.990545	0.99372	1.00904	0.980689	0.949899	0.977165	1.05096	0.986492	1.00854	1.03438	0.959829	0.988566	0.967539	1.1378	0.99551	1.02357	1.01086	1.01157	0.980297	1.01227	1.05359	0.979611	1.04938	1.01776	1.04206	0.918788	1.01258	1.02204	1.0143	0.99223	0.966765	0.99233	1.01521
418	chr2	7403443	7971841	0.955137	1.03252	0.936318	0.980493	1.01116	0.997802	1.0144	1.00421	0.979513	1.01116	0.959445	0.94535	1.01511	0.990545	0.99372	1.00904	0.980689	0.949899	0.977165	1.05096	0.986492	1.00854	1.03438	0.959829	0.988566	0.967539	1.1378	0.99551	1.02357	1.01086	1.01157	0.980297	1.01227	1.05359	0.979611	1.04938	1.01776	1.04206	0.918788	1.01258	1.02204	1.0143	0.99223	0.966765	0.99233	1.01521
419	chr2	7971842	8512706	0.955137	1.03252	0.936318	0.980493	1.01116	0.997802	1.0144	1.00421	0.979513	1.01116	0.959445	0.94535	1.01511	0.990545	0.99372	1.00904	0.980689	0.949899	0.977165	1.05096	0.986492	1.00854	1.03438	0.959829	0.988566	0.967539	1.1378	0.99551	1.02357	1.01086	1.01157	0.980297	1.01227	1.05359	0.979611	1.04938	1.01776	1.04206	0.918788	1.01258	1.02204	1.0143	0.99223	0.966765	0.99233	1.01521
420	chr2	8512707	9052869	0.955137	1.03252	0.936318	0.980493	1.01116	0.997802	1.0144	1.00421	0.979513	1.01116	0.959445	0.94535	1.01511	0.990545	0.99372	1.00904	0.980689	0.949899	0.977165	1.05096	0.986492	1.00854	1.03438	0.959829	0.988566	0.967539	1.1378	0.99551	1.02357	1.01086	1.01157	0.980297	1.01227	1.05359	0.979611	1.04938	1.01776	1.04206	0.918788	1.01258	1.02204	1.0143	0.99223	0.966765	0.99233	1.01521
421	chr2	9052870	9575839	0.955137	1.03252	0.936318	0.980493	1.01116	0.997802	1.0144	1.00421	0.979513	1.01116	0.959445	0.94535	1.01511	0.990545	0.99372	1.00904	0.980689	0.949899	0.977165	1.05096	0.986492	1.00854	1.03438	0.959829	0.988566	0.967539	1.1378	0.99551	1.02357	1.01086	1.01157	0.980297	1.01227	1.05359	0.979611	1.04938	1.01776	1.04206	0.918788	1.01258	1.02204	1.0143	0.99223	0.966765	0.99233	1.01521
422	chr2	9575840	10110255	0.955137	1.03252	0.936318	0.980493	1.01116	0.997802	1.0144	1.00421	0.979513	1.01116	0.959445	0.94535	1.01511	0.990545	0.99372	1.00904	0.980689	0.949899	0.977165	1.05096	0.986492	1.00854	1.03438	0.959829	0.988566	0.967539	1.1378	0.99551	1.02357	1.01086	1.01157	0.980297	1.01227	1.05359	0.979611	1.04938	1.01776	1.04206	0.918788	1.01258	1.02204	1.0143	0.99223	0.966765	0.99233	1.01521
423	chr2	10110256	10655572	0.955137	1.03252	0.936318	0.980493	1.01116	0.997802	1.0144	1.00421	0.979513	1.01116	0.959445	0.94535	1.01511	0.990545	0.99372	1.00904	0.980689	0.949899	0.977165	1.05096	0.986492	1.00854	1.03438	0.959829	0.988566	0.967539	1.1378	0.99551	1.02357	1.01086	1.01157	0.980297	1.01227	1.05359	0.979611	1.04938	1.01776	1.04206	0.918788	1.01258	1.02204	1.0143	0.99223	0.966765	0.99233	1.01521
424	chr2	10655573	11205796	0.955137	1.03252	0.936318	0.980493	1.01116	0.997802	1.0144	1.00421	0.979513	1.01116	0.959445	0.94535	1.01511	0.990545	0.99372	1.00904	0.980689	0.949899	0.977165	1.05096	0.986492	1.00854	1.03438	0.959829	0.988566	0.967539	1.1378	0.99551	1.02357	1.01086	1.01157	0.980297	1.01227	1.05359	0.979611	1.04938	1.01776	1.04206	0.918788	1.01258	1.02204	1.0143	0.99223	0.966765	0.99233	1.01521
425	chr2	11205797	11771021	0.955137	1.03252	0.936318	0.980493	1.01116	0.997802	1.0144	1.00421	0.979513	1.01116	0.959445	0.94535	1.01511	0.990545	0.99372	1.00904	0.980689	0.949899	0.977165	1.05096	0.986492	1.00854	1.03438	0.959829	0.988566	0.967539	1.1378	0.99551	1.02357	1.01086	1.01157	0.980297	1.01227	1.05359	0.979611	1.04938	1.01776	1.04206	0.918788	1.01258	1.02204	1.0143	0.99223	0.966765	0.99233	1.01521
426	chr2	11771022	12346639	0.955137	1.03252	0.936318	0.980493	1.01116	0.997802	1.0144	1.00421	0.979513	1.01116	0.959445	0.94535	1.01511	0.990545	0.99372	1.00904	0.980689	0.949899	0.977165	1.05096	0.986492	1.00854	1.03438	0.959829	0.988566	0.967539	1.1378	0.99551	1.02357	1.01086	1.01157	0.980297	1.01227	1.05359	0.979611	1.04938	1.01776	1.04206	0.918788	1.01258	1.02204	1.0143	0.99223	0.966765	0.99233	1.01521
427	chr2	12346640	12887469	0.955137	1.03252	0.936318	0.980493	1.01116	0.997802	1.0144	1.00421	0.979513	1.01116	0.959445	0.94535	1.01511	0.990545	0.99372	1.00904	0.980689	0.949899	0.977165	1.05096	0.986492	1.00854	1.03438	0.959829	0.988566	0.967539	1.1378	0.99551	1.02357	1.01086	1.01157	0.980297	1.01227	1.05359	0.979611	1.04938	1.01776	1.04206	0.918788	1.01258	1.02204	1.0143	0.99223	0.966765	0.99233	1.01521
428	chr2	12887470	13492121	0.955137	1.03252	0.936318	0.980493	1.01116	0.997802	1.0144	1.00421	0.979513	1.01116	0.959445	0.94535	1.01511	0.990545	0.99372	1.00904	0.980689	0.949899	0.977165	1.05096	0.986492	1.00854	1.03438	0.959829	0.988566	0.967539	1.1378	0.99551	1.02357	1.01086	1.01157	0.980297	1.01227	1.05359	0.979611	1.04938	1.01776	1.04206	0.918788	1.01258	1.02204	1.0143	0.99223	0.966765	0.99233	1.01521
429	chr2	13492122	14127845	0.955137	1.03252	0.936318	0.980493	1.01116	0.997802	1.0144	1.00421	0.979513	1.01116	0.959445	0.94535	1.01511	0.990545	0.99372	1.00904	0.980689	0.949899	0.977165	1.05096	0.986492	1.00854	1.03438	0.959829	0.988566	0.967539	1.1378	0.99551	1.02357	1.01086	1.01157	0.980297	1.01227	1.05359	0.979611	1.04938	1.01776	1.04206	0.918788	1.01258	1.02204	1.0143	0.99223	0.966765	0.99233	1.01521
430	chr2	14127846	14753477	0.955137	1.03252	0.936318	0.980493	1.01116	0.997802	1.0144	1.00421	0.979513	1.01116	0.959445	0.94535	1.01511	0.990545	0.99372	1.00904	0.980689	0.949899	0.977165	1.05096	0.986492	1.00854	1.03438	0.959829	0.988566	0.967539	1.1378	0.99551	1.02357	1.01086	1.01157	0.980297	1.01227	1.05359	0.979611	1.04938	1.01776	1.04206	0.918788	1.01258	1.02204	1.0143	0.99223	0.966765	0.99233	1.01521
431	chr2	14753478	15325175	0.955137	1.03252	0.936318	0.980493	1.01116	0.997802	1.0144	1.00421	0.979513	1.01116	0.959445	0.94535	1.01511	0.990545	0.99372	1.00904	0.980689	0.949899	0.977165	1.05096	0.986492	1.00854	1.03438	0.959829	0.988566	0.967539	1.1378	0.99551	1.02357	1.01086	1.01157	0.980297	1.01227	1.05359	0.979611	1.04938	1.01776	1.04206	0.918788	1.01258	1.02204	1.0143	0.99223	0.966765	0.99233	1.01521
432	chr2	15325176	15931324	0.955137	1.03252	0.936318	0.980493	1.01116	0.997802	1.0144	1.00421	0.979513	1.01116	0.959445	0.94535	1.01511	0.990545	0.99372	1.00904	0.980689	0.949899	0.977165	1.05096	0.986492	1.00854	1.03438	0.959829	0.988566	0.967539	1.1378	0.99551	1.02357	1.01086	1.01157	0.980297	1.01227	1.05359	0.979611	1.04938	1.01776	1.04206	0.918788	1.01258	1.02204	1.0143	0.99223	0.966765	0.99233	1.01521
433	chr2	15931325	16556105	0.955137	1.03252	0.936318	0.980493	1.01116	0.997802	1.0144	1.00421	0.979513	1.01116	0.959445	0.94535	1.01511	0.990545	0.99372	1.00904	0.980689	0.949899	0.977165	1.05096	0.986492	1.00854	1.03438	0.959829	0.988566	0.967539	1.1378	0.99551	1.02357	1.01086	1.01157	0.980297	1.01227	1.05359	0.979611	1.04938	1.01776	1.04206	0.918788	1.01258	1.02204	1.0143	0.99223	0.966765	0.99233	1.01521
434	chr2	16556106	17136767	0.955137	1.03252	0.936318	0.980493	1.01116	0.997802	1.0144	1.00421	0.979513	1.01116	0.959445	0.94535	1.01511	0.990545	0.99372	1.00904	0.980689	0.949899	0.977165	1.05096	0.986492	1.00854	1.03438	0.959829	0.988566	0.967539	1.1378	0.99551	1.02357	1.01086	1.01157	0.980297	1.01227	1.05359	0.979611	1.04938	1.01776	1.04206	0.918788	1.01258	1.02204	1.0143	0.99223	0.966765	0.99233	1.01521
435	chr2	17136768	17730064	0.955137	1.03252	0.936318	0.980493	1.01116	0.997802	1.0144	1.00421	0.979513	1.01116	0.959445	0.94535	1.01511	0.990545	0.99372	1.00904	0.980689	0.949899	0.977165	1.05096	0.986492	1.00854	1.03438	0.959829	0.988566	0.967539	1.1378	0.99551	1.02357	1.01086	1.01157	0.980297	1.01227	1.05359	0.979611	1.04938	1.01776	1.04206	0.918788	1.01258	1.02204	1.0143	0.99223	0.966765	0.99233	1.01521
436	chr2	17730065	18306218	0.955137	1.03252	0.936318	0.980493	1.01116	0.997802	1.0144	1.00421	0.979513	1.01116	0.959445	0.94535	1.01511	0.990545	0.99372	1.00904	0.980689	0.949899	0.977165	1.05096	0.986492	1.00854	1.03438	0.959829	0.988566	0.967539	1.1378	0.99551	1.02357	1.01086	1.01157	0.980297	1.01227	1.05359	0.979611	1.04938	1.01776	1.04206	0.918788	1.01258	1.02204	1.0143	0.99223	0.966765	0.99233	1.01521
437	chr2	18306219	18852855	0.955137	1.03252	0.936318	0.980493	1.01116	0.997802	1.0144	1.00421	0.979513	1.01116	0.959445	0.94535	1.01511	0.990545	0.99372	1.00904	0.980689	0.949899	0.977165	1.05096	0.986492	1.00854	1.03438	0.959829	0.988566	0.967539	1.1378	0.99551	1.02357	1.01086	1.01157	0.980297	1.01227	1.05359	0.979611	1.04938	1.01776	1.04206	0.918788	1.01258	1.02204	1.0143	0.99223	0.966765	0.99233	1.01521
438	chr2	18852856	19411929	0.955137	1.03252	0.936318	0.980493	1.01116	0.997802	1.0144	1.00421	0.979513	1.01116	0.959445	0.94535	1.01511	0.990545	0.99372	1.00904	0.980689	0.949899	0.977165	1.05096	0.986492	1.00854	1.03438	0.959829	0.988566	0.967539	1.1378	0.99551	1.02357	1.01086	1.01157	0.980297	1.01227	1.05359	0.979611	1.04938	1.01776	1.04206	0.918788	1.01258	1.02204	1.0143	0.99223	0.966765	0.99233	1.01521
439	chr2	19411930	19956961	0.955137	1.03252	0.936318	0.980493	1.01116	0.997802	1.0144	1.00421	0.979513	1.01116	0.959445	0.94535	1.01511	0.990545	0.99372	1.00904	0.980689	0.949899	0.977165	1.05096	0.986492	1.00854	1.03438	0.959829	0.988566	0.967539	1.1378	0.99551	1.02357	1.01086	1.01157	0.980297	1.01227	1.05359	0.979611	1.04938	1.01776	1.04206	0.918788	1.01258	1.02204	1.0143	0.99223	0.966765	0.99233	1.01521
440	chr2	19956962	20492039	0.955137	1.03252	0.936318	0.980493	1.01116	0.997802	1.0144	1.00421	0.979513	1.01116	0.959445	0.94535	1.01511	0.990545	0.99372	1.00904	0.980689	0.949899	0.977165	1.05096	0.986492	1.00854	1.03438	0.959829	0.988566	0.967539	1.0003	0.99551	1.02357	1.01086	1.01157	0.980297	1.01227	1.05359	0.979611	1.04938	1.01776	1.04206	0.918788	1.01258	1.02204	1.0143	0.99223	0.966765	0.99233	1.01521
441	chr2	20492040	21029475	0.955137	1.03252	0.936318	0.980493	1.01116	0.997802	1.0144	1.00421	0.979513	1.01116	0.959445	0.94535	1.01511	0.990545	0.99372	1.00904	0.980689	0.949899	0.977165	1.05096	0.986492	1.00854	1.03438	0.959829	0.988566	0.967539	1.0003	0.99551	1.02357	1.01086	1.01157	0.980297	1.01227	1.05359	0.979611	1.04938	1.01776	1.04206	0.918788	1.01258	1.02204	1.0143	0.99223	0.966765	0.99233	1.01521
442	chr2	21029476	21646752	0.955137	1.03252	0.936318	0.980493	1.01116	0.997802	1.0144	1.00421	0.979513	1.01116	0.959445	0.94535	1.01511	0.990545	0.99372	1.00904	0.980689	0.949899	0.977165	1.05096	0.986492	1.00854	1.03438	0.959829	0.988566	0.967539	1.0003	0.99551	1.02357	1.01086	1.01157	0.980297	1.01227	1.05359	0.979611	1.04938	1.01776	1.04206	0.918788	1.01258	1.02204	1.0143	0.99223	0.966765	0.99233	1.01521
443	chr2	21646753	22236360	0.955137	1.03252	0.936318	0.980493	1.01116	0.997802	1.0144	1.00421	0.979513	1.01116	0.959445	0.94535	1.01511	0.990545	0.99372	1.00904	0.980689	0.949899	0.977165	1.05096	0.986492	1.00854	1.03438	0.959829	0.988566	0.967539	1.0003	0.99551	1.02357	1.01086	1.01157	0.980297	1.01227	1.05359	0.979611	1.04938	1.01776	1.04206	0.918788	1.01258	1.02204	1.0143	0.99223	0.966765	0.99233	1.01521
444	chr2	22236361	22831152	0.955137	1.03252	0.936318	0.980493	1.01116	0.997802	1.0144	1.00421	0.979513	1.01116	0.959445	0.94535	1.01511	0.990545	0.99372	1.00904	0.980689	0.949899	0.977165	1.05096	0.986492	1.00854	1.03438	0.959829	0.988566	0.967539	1.0003	0.99551	1.02357	1.01086	1.01157	0.980297	1.01227	1.05359	0.979611	1.04938	1.01776	1.04206	0.918788	1.01258	1.02204	1.0143	0.99223	0.966765	0.99233	1.01521
445	chr2	22831153	23425818	0.955137	1.03252	0.936318	0.980493	1.01116	0.997802	1.0144	1.00421	0.979513	1.01116	0.959445	0.94535	1.01511	0.990545	0.99372	1.00904	0.980689	0.949899	0.977165	1.05096	0.986492	1.00854	1.03438	0.959829	0.988566	0.967539	1.0003	0.99551	1.02357	1.01086	1.01157	0.980297	1.01227	1.05359	0.979611	1.04938	1.01776	1.04206	0.918788	1.01258	1.02204	1.0143	0.99223	0.966765	0.99233	1.01521
446	chr2	23425819	23970592	0.955137	1.03252	0.936318	0.980493	1.01116	0.997802	1.0144	1.00421	0.979513	1.01116	0.959445	0.94535	1.01511	0.990545	0.99372	1.00904	0.980689	0.949899	0.977165	1.05096	0.986492	1.00854	1.03438	0.959829	0.988566	0.967539	1.0003	0.99551	1.02357	1.01086	1.01157	0.980297	1.01227	1.05359	0.979611	1.04938	1.01776	1.04206	0.918788	1.01258	1.02204	1.0143	0.99223	0.966765	0.99233	1.01521
447	chr2	23970593	24554221	0.955137	1.03252	0.936318	0.980493	1.01116	0.997802	1.0144	1.00421	0.979513	1.01116	0.959445	0.94535	1.01511	0.990545	0.99372	1.00904	0.980689	0.949899	0.977165	1.05096	0.986492	1.00854	1.03438	0.959829	0.988566	0.967539	1.0003	0.99551	1.02357	1.01086	1.01157	0.980297	1.01227	1.05359	0.979611	1.04938	1.01776	1.04206	0.918788	1.01258	1.02204	1.0143	0.99223	0.966765	0.99233	1.01521
448	chr2	24554222	25123168	0.955137	1.03252	0.936318	0.980493	1.01116	0.997802	1.0144	1.00421	0.979513	1.01116	0.959445	0.94535	1.01511	0.990545	0.99372	1.00904	0.980689	0.949899	0.977165	1.05096	0.986492	1.00854	1.03438	0.959829	0.988566	0.967539	1.0003	0.99551	1.02357	1.01086	1.01157	0.980297	1.01227	1.05359	0.979611	1.04938	1.01776	1.04206	0.918788	1.01258	1.02204	1.0143	0.99223	0.966765	0.99233	1.01521
449	chr2	25123169	25684596	0.955137	1.03252	0.936318	0.980493	1.01116	0.997802	1.0144	1.00421	0.979513	1.01116	0.959445	0.94535	1.01511	0.990545	0.99372	1.00904	0.980689	0.949899	0.977165	1.05096	0.986492	1.00854	1.03438	0.959829	0.988566	0.967539	1.0003	0.99551	1.02357	1.01086	1.01157	0.980297	1.01227	1.05359	0.979611	1.04938	1.01776	1.04206	0.918788	1.01258	1.02204	1.0143	0.99223	0.966765	0.99233	1.01521
450	chr2	25684597	26258371	0.955137	1.03252	0.936318	0.980493	1.01116	0.997802	1.0144	1.00421	0.979513	1.01116	0.959445	0.94535	1.01511	0.990545	0.99372	1.00904	0.980689	0.68011	0.977165	1.05096	0.986492	1.00854	1.03438	0.959829	0.988566	0.967539	1.0003	0.99551	1.02357	1.01086	1.01157	0.980297	1.01227	1.05359	0.979611	1.04938	1.01776	1.04206	0.918788	1.01258	1.02204	1.0143	0.99223	0.966765	0.99233	1.01521
451	chr2	26258372	26805770	0.955137	1.03252	0.936318	0.980493	1.01116	0.997802	1.0144	1.00421	0.979513	1.01116	0.959445	0.94535	1.01511	0.990545	0.99372	1.00904	0.980689	0.68011	0.977165	1.05096	0.986492	1.00854	1.03438	0.959829	0.988566	0.967539	1.0003	0.99551	1.02357	1.01086	1.01157	0.980297	1.01227	1.05359	0.979611	1.04938	1.01776	1.04206	0.918788	1.01258	1.02204	1.0143	0.99223	0.966765	0.99233	1.01521
452	chr2	26805771	27385234	0.955137	1.03252	0.936318	0.980493	1.01116	0.997802	1.0144	1.00421	0.979513	1.01116	0.959445	0.94535	1.01511	0.990545	0.99372	1.00904	0.980689	0.68011	0.977165	1.05096	0.986492	1.00854	1.03438	0.959829	0.988566	0.967539	1.0003	0.99551	1.02357	1.01086	1.01157	0.980297	1.01227	1.05359	0.979611	1.04938	1.01776	1.04206	0.918788	1.01258	1.02204	1.0143	0.99223	0.966765	0.99233	1.01521
453	chr2	27385235	27959209	0.955137	1.03252	0.936318	0.980493	1.01116	0.997802	1.0144	1.00421	0.979513	1.01116	0.959445	0.94535	1.01511	0.990545	0.99372	1.00904	0.980689	0.68011	0.977165	1.05096	0.986492	1.00854	1.03438	0.959829	0.988566	0.967539	1.0003	0.99551	1.02357	1.01086	1.01157	0.980297	1.01227	1.05359	0.979611	1.04938	1.01776	1.04206	0.918788	1.01258	1.02204	1.0143	0.99223	0.966765	0.99233	1.01521
454	chr2	27959210	28525664	0.955137	1.03252	0.936318	0.980493	1.01116	0.997802	1.0144	1.00421	0.979513	1.01116	0.959445	0.94535	1.01511	0.990545	0.99372	1.00904	0.980689	0.68011	0.977165	1.05096	0.986492	1.00854	1.03438	0.959829	0.988566	0.967539	1.0003	0.99551	1.02357	1.01086	1.01157	0.980297	1.01227	1.05359	0.979611	1.04938	1.01776	1.04206	0.918788	1.01258	1.02204	1.0143	0.99223	0.966765	0.99233	1.01521
455	chr2	28525665	29051652	0.955137	1.03252	0.936318	0.980493	1.01116	0.997802	1.0144	1.00421	0.979513	1.01116	0.959445	0.94535	1.01511	0.990545	0.99372	1.00904	0.980689	0.68011	0.977165	1.05096	0.986492	1.00854	1.03438	0.959829	0.988566	0.967539	1.0003	0.99551	1.02357	1.01086	1.01157	0.980297	1.01227	1.05359	0.979611	1.04938	1.01776	1.04206	0.918788	1.01258	1.02204	1.0143	0.99223	0.966765	0.99233	1.01521
456	chr2	29051653	29590892	0.955137	1.03252	0.936318	0.980493	1.01116	0.997802	1.0144	1.00421	0.979513	1.01116	0.959445	0.94535	1.01511	0.990545	0.99372	1.00904	0.980689	0.955329	0.977165	1.05096	0.986492	1.00854	1.03438	0.959829	0.988566	0.967539	1.0003	0.99551	1.02357	1.01086	1.01157	0.980297	1.01227	1.05359	0.979611	1.04938	1.01776	1.04206	0.918788	1.01258	1.02204	1.0143	0.99223	0.966765	0.99233	1.01521
457	chr2	29590893	30107675	0.955137	1.03252	0.936318	0.980493	1.01116	0.997802	1.0144	1.00421	0.979513	1.01116	0.959445	0.94535	1.01511	0.990545	0.99372	1.00904	0.980689	0.955329	0.977165	1.05096	0.986492	1.00854	1.03438	0.959829	0.988566	0.967539	1.0003	0.99551	1.02357	1.01086	1.01157	0.980297	1.01227	1.05359	0.979611	1.04938	1.01776	1.04206	0.918788	1.01258	1.02204	1.0143	0.99223	0.966765	0.99233	1.01521
458	chr2	30107676	30639392	0.955137	1.03252	0.936318	0.980493	1.01116	0.997802	1.0144	1.00421	0.979513	1.01116	0.959445	0.94535	1.01511	0.990545	0.99372	1.00904	0.980689	0.955329	0.977165	1.05096	0.986492	1.00854	1.03438	0.959829	0.988566	0.967539	1.0003	0.99551	1.02357	1.01086	1.01157	0.980297	1.01227	1.05359	0.979611	1.04938	1.01776	1.04206	0.918788	1.01258	1.02204	1.0143	0.99223	0.966765	0.99233	1.01521
459	chr2	30639393	31172288	0.955137	1.03252	0.936318	0.980493	1.01116	0.997802	1.0144	1.00421	0.979513	1.01116	0.959445	0.94535	1.01511	0.990545	0.99372	1.00904	0.980689	0.955329	0.977165	1.05096	0.986492	1.00854	1.03438	0.959829	0.988566	0.967539	1.0003	0.99551	1.02357	1.01086	1.01157	0.980297	1.01227	1.05359	0.979611	1.04938	1.01776	1.04206	0.918788	1.01258	1.02204	1.0143	0.99223	0.966765	0.99233	1.01521
460	chr2	31172289	31689205	0.955137	1.03252	0.936318	0.980493	1.01116	0.997802	1.0144	1.00421	0.979513	1.01116	0.959445	0.94535	1.01511	0.990545	0.99372	1.00904	0.980689	0.955329	0.977165	1.05096	0.986492	1.00854	1.03438	0.959829	0.988566	0.967539	1.0003	0.99551	1.02357	1.01086	1.01157	0.980297	1.01227	1.05359	0.979611	1.04938	1.01776	1.04206	0.918788	1.01258	1.02204	1.0143	0.99223	0.966765	0.99233	1.01521
461	chr2	31689206	32316549	0.955137	1.03252	0.936318	0.980493	1.01116	0.997802	1.0144	1.00421	0.979513	1.01116	0.959445	0.94535	1.01511	0.990545	0.99372	1.00904	0.980689	0.955329	0.977165	1.05096	0.986492	1.00854	1.03438	0.959829	0.988566	0.967539	1.0003	0.99551	1.02357	1.01086	1.01157	0.980297	1.01227	1.05359	0.979611	1.04938	1.01776	1.04206	0.918788	1.01258	1.02204	1.0143	0.99223	0.966765	0.99233	1.01521
462	chr2	32316550	32948305	0.955137	1.03252	0.936318	0.980493	1.01116	0.997802	1.0144	1.00421	0.979513	1.01116	0.959445	0.94535	1.01511	0.990545	0.99372	1.00904	0.980689	0.955329	0.977165	1.05096	0.986492	1.00854	1.03438	0.959829	0.988566	0.967539	1.0003	0.99551	1.02357	1.01086	1.01157	0.980297	1.01227	1.05359	0.979611	1.04938	1.01776	1.04206	0.918788	1.01258	1.02204	1.0143	0.99223	0.966765	0.99233	1.01521
463	chr2	32948306	33506929	0.955137	1.03252	0.936318	0.980493	1.01116	0.997802	1.0144	1.00421	0.979513	1.01116	0.959445	0.94535	1.01511	0.990545	0.99372	1.00904	0.980689	0.955329	0.977165	1.05096	0.986492	1.00854	1.03438	0.959829	0.988566	0.967539	1.0003	0.99551	1.02357	1.01086	1.01157	0.980297	1.01227	1.05359	0.979611	1.04938	1.01776	1.04206	0.918788	1.01258	1.02204	1.0143	0.99223	0.966765	0.99233	1.01521
464	chr2	33506930	34057170	0.955137	1.03252	0.936318	0.980493	1.01116	0.997802	1.0144	1.00421	0.979513	1.01116	0.959445	0.94535	1.01511	0.990545	0.99372	1.00904	0.980689	0.955329	0.977165	1.05096	0.986492	1.00854	1.03438	0.959829	0.988566	0.967539	1.0003	0.99551	1.02357	1.01086	1.01157	0.980297	1.01227	1.05359	0.979611	1.04938	1.01776	1.04206	0.918788	1.01258	1.02204	1.0143	0.99223	0.966765	0.99233	1.01521
465	chr2	34057171	34655072	0.955137	1.03252	0.936318	0.980493	1.01116	0.997802	1.0144	1.00421	0.979513	1.01116	0.959445	0.94535	1.01511	0.990545	0.99372	1.00904	0.980689	0.955329	0.977165	1.05096	0.986492	1.00854	1.03438	0.959829	0.988566	0.967539	1.0003	0.99551	1.02357	1.01086	1.01157	0.980297	1.01227	1.05359	0.979611	1.04938	1.01776	1.04206	0.918788	1.01258	1.02204	1.0143	0.99223	0.966765	0.99233	1.01521
466	chr2	34655073	35293667	0.955137	1.03252	0.936318	0.980493	1.01116	0.997802	1.0144	1.00421	0.979513	1.01116	0.959445	0.94535	1.01511	0.990545	0.99372	1.00904	0.980689	0.955329	0.977165	1.05096	0.986492	1.00854	1.03438	0.959829	0.988566	0.967539	1.0003	0.99551	1.02357	1.01086	1.01157	0.980297	1.01227	1.05359	0.979611	1.04938	1.01776	1.04206	0.918788	1.01258	1.02204	1.0143	0.99223	0.966765	0.99233	1.01521
467	chr2	35293668	35934724	0.955137	1.03252	0.936318	0.980493	1.01116	0.997802	1.0144	1.00421	0.979513	1.01116	0.959445	0.94535	1.01511	0.990545	0.99372	1.00904	0.980689	0.955329	0.977165	1.05096	0.986492	1.00854	1.03438	0.959829	0.988566	0.967539	1.0003	0.99551	1.02357	1.01086	1.01157	0.980297	1.01227	1.05359	0.979611	1.04938	1.01776	1.04206	0.918788	1.01258	1.02204	1.0143	0.99223	0.966765	0.99233	1.01521
468	chr2	35934725	36560079	0.955137	1.03252	0.936318	0.980493	1.01116	0.997802	1.0144	1.00421	0.979513	1.01116	0.959445	0.94535	1.01511	0.990545	0.99372	1.00904	0.980689	0.955329	0.977165	1.05096	0.986492	1.00854	1.03438	0.959829	0.988566	0.967539	1.0003	0.99551	1.02357	1.01086	1.01157	0.980297	1.01227	1.05359	0.979611	1.04938	1.01776	1.04206	0.918788	1.01258	1.02204	1.0143	0.99223	0.966765	0.99233	1.01521
469	chr2	36560080	37092746	0.955137	1.03252	0.936318	0.980493	1.01116	0.997802	1.0144	1.00421	0.979513	1.01116	0.959445	0.94535	1.01511	0.990545	0.99372	1.00904	0.980689	0.955329	0.977165	1.05096	0.986492	1.00854	1.03438	0.959829	0.988566	0.967539	1.0003	0.99551	1.02357	1.01086	1.01157	0.980297	1.01227	1.05359	0.979611	1.04938	1.01776	1.04206	0.918788	1.01258	1.02204	1.0143	0.99223	0.966765	0.99233	1.01521
470	chr2	37092747	37650850	0.955137	1.03252	0.936318	0.980493	1.01116	0.997802	1.0144	1.00421	0.979513	1.01116	0.959445	0.94535	1.01511	0.990545	0.99372	1.00904	0.980689	0.955329	0.977165	1.05096	0.986492	1.00854	1.03438	0.959829	0.988566	0.967539	1.0003	0.99551	1.02357	1.01086	1.01157	0.980297	1.01227	1.05359	0.979611	1.04938	1.01776	1.04206	0.918788	1.01258	1.02204	1.0143	0.99223	0.966765	0.99233	1.01521
471	chr2	37650851	38166331	0.955137	1.03252	0.936318	0.980493	1.01116	0.997802	1.0144	1.00421	0.979513	1.01116	0.959445	0.94535	1.01511	0.990545	0.99372	1.00904	0.980689	0.955329	0.977165	1.05096	0.986492	1.00854	1.03438	0.959829	0.988566	0.967539	1.0003	0.99551	1.02357	1.01086	1.01157	0.980297	1.01227	1.05359	0.979611	1.04938	1.01776	1.04206	0.918788	1.01258	1.02204	1.0143	0.99223	0.966765	0.99233	1.01521
472	chr2	38166332	38741349	0.955137	1.03252	0.936318	0.980493	1.01116	0.997802	1.0144	1.00421	0.979513	1.01116	0.959445	0.94535	1.01511	0.990545	0.99372	1.00904	0.980689	0.955329	0.977165	1.05096	0.986492	1.00854	1.03438	0.959829	0.988566	0.967539	1.0003	0.99551	1.02357	1.01086	1.01157	0.980297	1.01227	1.05359	0.979611	1.04938	1.01776	1.04206	0.918788	1.01258	1.02204	1.0143	0.99223	0.966765	0.99233	1.01521
473	chr2	38741350	39317701	0.955137	1.03252	0.936318	0.980493	1.01116	0.997802	1.0144	1.00421	0.979513	1.01116	0.959445	0.94535	1.01511	0.990545	0.99372	1.00904	0.980689	0.955329	0.977165	1.05096	0.986492	1.00854	1.03438	0.959829	0.988566	0.967539	1.0003	0.99551	1.02357	1.01086	1.01157	0.980297	1.01227	1.05359	0.979611	1.04938	1.01776	1.04206	0.918788	1.01258	1.02204	1.0143	0.99223	0.966765	0.99233	1.01521
474	chr2	39317702	39885826	0.955137	1.03252	0.936318	0.980493	1.01116	0.997802	1.0144	1.00421	0.979513	1.01116	0.959445	0.94535	1.01511	0.990545	0.99372	1.00904	0.980689	0.955329	0.977165	1.05096	0.986492	1.00854	1.03438	0.959829	0.988566	0.967539	1.0003	0.99551	1.02357	1.01086	1.01157	0.980297	1.01227	1.05359	0.979611	1.04938	1.01776	1.04206	0.918788	1.01258	1.02204	1.0143	0.99223	0.966765	0.99233	1.01521
475	chr2	39885827	40424414	0.955137	1.03252	0.936318	0.980493	1.01116	0.997802	1.0144	1.00421	0.979513	1.01116	0.959445	0.94535	1.01511	0.990545	0.99372	1.00904	0.980689	0.955329	0.977165	1.05096	0.986492	1.00854	1.03438	0.959829	0.988566	0.967539	1.0003	0.99551	1.02357	1.01086	1.01157	0.980297	1.01227	1.05359	0.979611	1.04938	1.01776	1.04206	0.918788	1.01258	1.02204	1.0143	0.99223	0.966765	0.99233	1.01521
476	chr2	40424415	40985600	0.955137	1.03252	0.936318	0.980493	1.01116	0.997802	1.0144	1.00421	0.979513	1.01116	0.959445	0.94535	1.01511	0.990545	0.99372	1.00904	0.980689	0.955329	0.977165	1.05096	0.986492	1.00854	1.03438	0.959829	0.988566	0.967539	1.0003	0.45685	1.02357	1.01086	1.01157	0.980297	1.01227	1.05359	0.979611	1.04938	1.01776	1.04206	0.918788	1.01258	1.02204	1.0143	0.99223	0.966765	0.99233	1.01521
477	chr2	40985601	41577568	0.955137	1.03252	0.936318	0.980493	1.01116	0.997802	1.0144	1.00421	0.979513	1.01116	0.959445	0.94535	1.01511	0.990545	0.99372	1.00904	0.980689	0.955329	0.977165	1.05096	0.986492	1.00854	1.03438	0.959829	0.988566	0.967539	1.0003	0.45685	1.02357	1.01086	1.01157	0.980297	1.01227	1.05359	0.979611	1.04938	1.01776	1.04206	0.918788	1.01258	1.02204	1.0143	0.99223	0.966765	0.99233	1.01521
478	chr2	41577569	42142274	0.955137	1.03252	0.936318	0.980493	1.01116	0.997802	1.0144	1.00421	0.979513	1.01116	0.959445	0.94535	1.01511	0.990545	0.99372	1.00904	0.980689	0.955329	0.977165	1.05096	0.986492	1.00854	1.03438	0.959829	0.988566	0.967539	1.0003	0.984521	1.02357	1.01086	1.01157	0.980297	1.01227	1.05359	0.979611	1.04938	1.01776	1.04206	0.918788	1.01258	1.02204	1.0143	0.99223	0.966765	0.99233	1.01521
479	chr2	42142275	42706203	0.955137	1.03252	0.936318	0.980493	1.01116	0.997802	1.0144	1.00421	0.979513	1.01116	0.959445	0.94535	1.01511	0.990545	0.99372	1.00904	0.980689	0.955329	0.977165	1.05096	0.986492	1.00854	1.03438	0.959829	0.988566	0.967539	1.0003	0.984521	1.02357	1.01086	1.01157	0.980297	1.01227	1.05359	0.979611	1.04938	1.01776	1.04206	0.918788	1.01258	1.02204	1.0143	0.99223	0.966765	0.99233	1.01521
480	chr2	42706204	43279901	0.955137	1.03252	0.936318	0.980493	1.01116	0.997802	1.0144	1.00421	0.979513	1.01116	0.959445	0.94535	1.01511	0.990545	0.99372	1.00904	0.980689	0.955329	0.977165	1.05096	0.986492	1.00854	1.03438	0.959829	0.988566	0.967539	1.0003	0.984521	1.02357	1.01086	1.01157	0.980297	1.01227	1.05359	0.979611	1.04938	1.01776	1.04206	0.918788	1.01258	1.02204	1.0143	0.99223	0.966765	0.99233	1.01521
481	chr2	43279902	43813278	0.955137	1.03252	0.936318	0.980493	1.01116	0.997802	1.0144	1.00421	0.979513	1.01116	0.959445	0.94535	1.01511	0.990545	0.99372	1.00904	0.980689	0.955329	0.977165	1.05096	0.986492	1.00854	1.03438	0.959829	0.988566	0.967539	1.0003	0.984521	1.02357	1.01086	1.01157	0.980297	1.01227	1.05359	0.979611	1.04938	1.01776	1.04206	0.918788	1.01258	1.02204	1.0143	0.99223	0.966765	0.99233	1.01521
482	chr2	43813279	44388866	0.955137	1.03252	0.936318	0.980493	1.01116	0.997802	1.0144	1.00421	0.979513	1.01116	0.959445	0.94535	1.01511	0.990545	0.99372	1.00904	0.980689	0.955329	0.977165	1.05096	0.986492	1.00854	1.03438	0.959829	0.988566	0.967539	1.0003	0.984521	1.02357	1.01086	1.01157	0.980297	1.01227	1.05359	0.979611	1.04938	1.01776	1.04206	0.918788	1.01258	1.02204	1.0143	0.99223	0.966765	0.99233	1.01521
483	chr2	44388867	44974897	0.955137	1.03252	0.936318	0.980493	1.01116	0.997802	1.0144	1.00421	0.979513	1.01116	0.959445	0.94535	1.01511	0.990545	0.99372	1.00904	0.980689	0.955329	0.977165	1.05096	0.986492	1.00854	1.03438	0.959829	0.988566	0.967539	1.0003	0.984521	1.02357	1.01086	1.01157	0.980297	1.01227	1.05359	0.979611	1.04938	1.01776	1.04206	0.918788	1.01258	1.02204	1.0143	0.99223	0.966765	0.99233	1.01521
484	chr2	44974898	45530274	0.955137	1.03252	0.936318	0.980493	1.01116	0.997802	1.0144	1.00421	0.979513	1.01116	0.959445	0.94535	1.01511	0.990545	0.99372	1.00904	0.980689	0.955329	0.977165	1.05096	0.986492	1.00854	1.03438	0.959829	0.988566	0.967539	1.0003	0.984521	1.02357	1.01086	1.01157	0.980297	1.01227	1.05359	0.979611	1.04938	1.01776	1.04206	0.918788	1.01258	1.02204	1.0143	0.99223	0.966765	0.99233	1.01521
485	chr2	45530275	46061029	0.955137	1.03252	0.936318	0.980493	1.01116	0.997802	1.0144	1.00421	0.979513	1.01116	0.959445	0.94535	1.01511	0.990545	0.99372	1.00904	0.980689	0.955329	0.977165	1.05096	0.986492	1.00854	1.03438	0.959829	0.988566	0.967539	1.0003	0.984521	1.02357	1.01086	1.01157	0.980297	1.01227	1.05359	0.979611	1.04938	1.01776	1.04206	0.918788	1.01258	1.02204	1.0143	0.99223	0.966765	0.99233	1.01521
486	chr2	46061030	46573758	0.955137	1.03252	0.936318	0.980493	1.01116	0.997802	1.0144	1.00421	0.979513	1.01116	0.959445	0.94535	1.01511	0.990545	0.99372	1.00904	0.980689	0.955329	0.977165	1.05096	0.986492	1.00854	1.03438	0.959829	0.988566	0.967539	1.0003	0.984521	1.02357	1.01086	1.01157	0.980297	1.01227	1.05359	0.979611	1.04938	1.01776	1.04206	0.918788	1.01258	1.02204	1.0143	0.99223	0.966765	0.99233	1.01521
487	chr2	46573759	47104378	0.955137	1.03252	0.936318	0.980493	1.01116	0.997802	1.0144	1.00421	0.979513	1.01116	0.959445	0.94535	1.01511	0.990545	0.99372	1.00904	0.980689	0.955329	0.977165	1.05096	0.986492	1.00854	1.03438	0.959829	0.988566	0.967539	1.0003	0.984521	1.02357	1.01086	1.01157	0.980297	1.01227	1.05359	0.979611	1.04938	1.01776	1.04206	0.918788	1.01258	1.02204	1.0143	0.99223	0.966765	0.99233	1.01521
488	chr2	47104379	47663655	0.955137	1.03252	0.936318	0.980493	1.01116	0.997802	1.0144	1.00421	0.979513	1.01116	0.959445	0.94535	1.01511	0.990545	0.99372	1.00904	0.980689	0.955329	0.977165	1.05096	0.986492	1.00854	1.03438	0.959829	0.988566	0.967539	1.0003	0.984521	1.02357	1.01086	1.01157	0.980297	1.01227	1.05359	0.979611	1.04938	1.01776	1.04206	0.918788	1.01258	1.02204	1.0143	0.99223	0.966765	0.99233	1.01521
489	chr2	47663656	48241842	0.955137	1.03252	0.936318	0.980493	1.01116	0.997802	1.0144	1.00421	0.979513	1.01116	0.959445	0.94535	1.01511	0.990545	0.99372	1.00904	0.980689	0.955329	0.977165	1.05096	0.986492	1.00854	1.03438	0.959829	0.988566	0.967539	1.0003	0.984521	1.02357	1.01086	1.01157	0.980297	1.01227	1.05359	0.979611	1.04938	1.01776	1.04206	0.918788	1.01258	1.02204	1.0143	0.99223	0.966765	0.99233	1.01521
490	chr2	48241843	48848589	0.955137	1.03252	0.936318	0.980493	1.01116	0.997802	1.0144	1.00421	0.979513	1.01116	0.959445	0.94535	1.01511	0.990545	0.99372	1.00904	0.980689	0.955329	0.977165	1.05096	0.986492	1.00854	1.03438	0.959829	0.988566	0.967539	1.0003	0.984521	1.02357	1.01086	1.01157	0.980297	1.01227	1.05359	0.979611	1.04938	1.01776	1.04206	0.918788	1.01258	1.02204	1.0143	0.99223	0.966765	0.99233	1.01521
491	chr2	48848590	49440252	0.955137	1.03252	0.936318	0.980493	1.01116	0.997802	1.0144	1.00421	0.979513	1.01116	0.959445	0.94535	1.01511	0.990545	0.99372	1.00904	0.980689	0.955329	0.977165	1.05096	0.986492	1.00854	1.03438	0.959829	0.988566	0.967539	1.0003	0.984521	1.02357	1.01086	1.01157	0.980297	1.01227	1.05359	0.979611	1.04938	1.01776	1.04206	0.918788	1.01258	1.02204	1.0143	0.99223	0.966765	0.99233	1.01521
492	chr2	49440253	50059669	0.955137	1.03252	0.936318	0.980493	1.01116	0.997802	1.0144	1.00421	0.979513	1.01116	0.959445	0.94535	1.01511	0.990545	0.99372	1.00904	0.980689	0.955329	0.977165	1.05096	0.986492	1.00854	1.03438	0.959829	0.988566	0.967539	1.0003	0.984521	1.02357	1.01086	1.01157	0.980297	1.01227	1.05359	0.979611	1.04938	1.01776	1.04206	0.918788	1.01258	1.02204	1.0143	0.99223	0.966765	0.99233	1.01521
493	chr2	50059670	50667943	0.955137	1.03252	0.936318	0.980493	1.01116	0.997802	1.0144	1.00421	0.979513	1.01116	0.959445	0.94535	1.01511	0.990545	0.99372	1.00904	0.980689	0.955329	0.977165	1.05096	0.986492	1.00854	1.03438	0.959829	0.988566	0.967539	1.0003	0.984521	1.02357	1.01086	1.01157	0.980297	1.01227	1.05359	0.979611	1.04938	1.01776	1.04206	0.918788	1.01258	1.02204	1.0143	0.99223	0.966765	0.99233	1.01521
494	chr2	50667944	51225749	0.955137	1.03252	0.936318	0.980493	1.01116	0.997802	1.0144	1.00421	0.979513	1.01116	0.959445	0.94535	1.01511	0.990545	0.99372	1.00904	0.980689	0.955329	0.977165	1.05096	0.986492	1.00854	1.03438	0.959829	0.988566	0.967539	1.0003	0.984521	1.02357	1.01086	1.01157	0.980297	1.01227	1.05359	0.979611	1.04938	1.01776	1.04206	0.918788	1.01258	1.02204	1.0143	0.99223	0.966765	0.99233	1.01521
495	chr2	51225750	51857655	0.955137	1.03252	0.936318	0.980493	1.01116	0.997802	1.0144	1.00421	0.979513	1.01116	0.959445	0.94535	1.01511	0.990545	0.99372	1.00904	0.980689	0.955329	0.977165	1.05096	0.986492	1.00854	1.03438	0.959829	0.988566	0.967539	1.0003	0.984521	1.02357	1.01086	1.01157	0.980297	1.01227	1.05359	0.979611	1.04938	1.01776	1.04206	0.918788	1.01258	1.02204	1.0143	0.99223	0.966765	0.99233	1.01521
496	chr2	51857656	52495295	0.955137	1.03252	0.936318	0.980493	1.01116	0.997802	1.0144	1.00421	0.979513	1.01116	0.959445	0.94535	1.01511	0.990545	0.99372	1.00904	0.980689	0.955329	0.977165	1.05096	0.986492	1.00854	1.03438	0.959829	0.988566	0.967539	1.0003	0.984521	1.02357	1.01086	1.01157	0.980297	1.01227	1.05359	0.979611	1.04938	1.01776	1.04206	0.918788	1.01258	1.02204	1.0143	0.99223	0.966765	0.99233	1.01521
497	chr2	52495296	53121072	0.955137	1.03252	0.936318	0.980493	1.01116	0.997802	1.0144	1.00421	0.979513	1.01116	0.959445	0.94535	1.01511	0.990545	0.99372	1.00904	0.980689	0.955329	0.977165	1.05096	0.986492	1.00854	1.03438	0.959829	0.988566	0.967539	1.0003	0.984521	1.02357	1.01086	1.01157	0.980297	1.01227	1.05359	0.979611	1.04938	1.01776	1.04206	0.918788	1.01258	1.02204	1.0143	0.99223	0.966765	0.99233	1.01521
498	chr2	53121073	53734472	0.955137	1.03252	0.936318	0.980493	1.01116	0.997802	1.0144	1.00421	0.979513	1.01116	0.959445	0.94535	1.01511	0.990545	0.99372	1.00904	0.980689	0.955329	0.977165	1.05096	0.986492	1.00854	1.03438	0.959829	0.988566	0.967539	1.0003	0.984521	1.02357	1.01086	1.01157	0.980297	1.01227	1.05359	0.979611	1.04938	1.01776	1.04206	0.918788	1.01258	1.02204	1.0143	0.99223	0.966765	0.99233	1.01521
499	chr2	53734473	54322414	0.955137	1.03252	0.936318	0.980493	1.01116	0.997802	1.0144	1.00421	0.979513	1.01116	0.959445	0.94535	1.01511	0.990545	0.99372	1.00904	0.980689	0.955329	0.977165	1.05096	0.986492	1.00854	1.03438	0.959829	0.988566	0.967539	1.0003	0.984521	1.02357	1.01086	1.01157	0.980297	1.01227	1.05359	0.979611	1.04938	1.01776	1.04206	0.918788	1.01258	1.02204	1.0143	0.99223	0.966765	0.99233	1.01521
500	chr2	54322415	54873111	0.955137	1.03252	0.936318	0.980493	1.01116	0.997802	1.0144	1.00421	0.979513	1.01116	0.959445	0.94535	1.01511	0.990545	0.99372	1.00904	0.980689	0.955329	0.977165	1.05096	0.986492	1.00854	1.03438	0.959829	0.988566	0.967539	1.0003	0.984521	1.02357	1.01086	1.01157	0.980297	1.01227	1.05359	0.979611	1.04938	1.01776	1.04206	0.918788	1.01258	1.02204	1.0143	0.99223	0.966765	0.99233	1.01521
501	chr2	54873112	55410816	0.955137	1.03252	0.936318	0.980493	1.01116	0.997802	1.0144	1.00421	0.979513	1.01116	0.959445	0.94535	1.01511	0.990545	0.99372	1.00904	0.980689	0.955329	0.977165	1.05096	0.986492	1.00854	1.03438	0.959829	0.988566	0.967539	1.0003	0.984521	1.02357	1.01086	1.01157	0.980297	1.01227	1.05359	0.979611	1.04938	1.01776	1.04206	0.918788	1.01258	1.02204	1.0143	0.99223	0.966765	0.99233	1.01521
502	chr2	55410817	56016875	0.955137	1.03252	0.936318	0.980493	1.01116	0.997802	1.0144	1.00421	0.979513	1.01116	0.959445	0.94535	1.01511	0.990545	0.99372	1.00904	0.980689	1.23837	0.977165	1.05096	0.986492	1.00854	1.03438	0.959829	0.988566	0.967539	1.0003	0.984521	1.02357	1.01086	1.01157	0.980297	1.01227	1.05359	0.979611	1.04938	1.01776	1.04206	0.918788	1.01258	1.02204	1.0143	0.99223	0.966765	0.99233	1.01521
503	chr2	56016876	56585117	0.955137	1.03252	0.936318	0.980493	1.01116	0.997802	1.0144	1.00421	0.979513	1.01116	0.959445	0.94535	1.01511	0.990545	0.99372	1.00904	0.980689	1.23837	0.977165	1.05096	0.986492	1.00854	1.03438	0.959829	0.988566	0.967539	1.0003	0.984521	1.02357	1.01086	1.01157	0.980297	1.01227	1.05359	0.979611	1.04938	1.01776	1.04206	0.918788	1.01258	1.02204	1.0143	0.99223	0.966765	0.99233	1.01521
504	chr2	56585118	57199903	0.955137	1.03252	0.936318	0.980493	1.01116	0.997802	1.0144	1.00421	0.979513	1.01116	0.959445	0.94535	1.01511	0.990545	0.99372	1.00904	0.980689	1.23837	0.977165	1.05096	0.986492	1.00854	1.03438	0.959829	0.988566	0.967539	1.0003	0.984521	1.02357	1.01086	1.01157	0.980297	1.01227	1.05359	0.979611	1.04938	1.01776	1.04206	0.918788	1.01258	1.02204	1.0143	0.99223	0.966765	0.99233	1.01521
505	chr2	57199904	57860519	0.955137	1.03252	0.936318	0.980493	1.01116	0.997802	1.0144	1.00421	0.979513	1.01116	0.959445	0.94535	1.01511	0.990545	0.99372	1.00904	0.980689	1.23837	0.977165	1.05096	0.986492	1.00854	0.765137	0.959829	0.988566	0.967539	1.0003	0.984521	1.02357	1.01086	1.01157	0.980297	1.01227	1.05359	0.979611	1.04938	1.01776	1.04206	0.918788	1.01258	1.02204	1.0143	0.99223	0.966765	0.99233	1.01521
506	chr2	57860520	58480694	0.955137	1.03252	0.936318	0.980493	1.01116	0.997802	1.0144	1.00421	0.979513	1.01116	0.959445	0.94535	1.01511	0.990545	0.99372	1.00904	0.980689	1.23837	0.977165	1.05096	0.986492	1.00854	0.765137	0.959829	0.988566	0.967539	1.0003	0.984521	1.02357	1.01086	1.01157	0.980297	1.01227	1.05359	0.979611	1.04938	1.01776	1.04206	0.918788	1.01258	1.02204	1.0143	0.99223	0.966765	0.99233	1.01521
507	chr2	58480695	59064145	0.955137	1.03252	0.936318	0.980493	1.01116	0.997802	1.0144	1.00421	0.979513	1.01116	0.959445	0.94535	1.01511	0.990545	0.99372	1.00904	0.980689	1.23837	0.977165	1.05096	0.986492	1.00854	0.765137	0.959829	0.988566	0.967539	1.0003	0.984521	1.02357	1.01086	1.01157	0.980297	1.01227	1.05359	0.979611	1.04938	1.01776	1.04206	0.918788	1.01258	1.02204	1.0143	0.99223	0.966765	0.99233	1.01521
508	chr2	59064146	59626627	0.955137	1.03252	0.936318	0.980493	1.01116	0.997802	1.0144	1.00421	0.979513	1.01116	0.959445	0.94535	1.01511	0.990545	0.99372	1.00904	0.980689	1.23837	0.977165	1.05096	0.986492	1.00854	0.765137	0.959829	0.988566	0.967539	1.0003	0.984521	1.02357	1.01086	1.01157	0.980297	1.01227	1.05359	0.979611	1.04938	1.01776	1.04206	0.918788	1.01258	1.02204	1.0143	0.99223	0.966765	0.99233	1.01521
509	chr2	59626628	60218381	0.955137	1.03252	0.936318	0.980493	1.01116	0.997802	1.0144	1.00421	0.979513	1.01116	0.959445	0.94535	1.01511	0.990545	0.99372	1.00904	0.980689	1.23837	0.977165	1.05096	0.986492	1.00854	0.765137	0.959829	0.988566	0.967539	1.0003	0.984521	1.02357	1.01086	1.01157	0.980297	1.01227	1.05359	0.979611	1.04938	1.01776	1.04206	0.918788	1.01258	1.02204	1.0143	0.99223	0.966765	0.99233	1.01521
510	chr2	60218382	60766100	0.955137	1.03252	0.936318	0.980493	1.01116	0.997802	1.0144	1.00421	0.979513	1.01116	0.959445	0.94535	1.01511	0.990545	0.99372	1.00904	0.980689	1.23837	0.977165	1.05096	0.986492	1.00854	0.765137	0.959829	0.988566	0.967539	1.0003	0.984521	1.02357	1.01086	1.01157	0.980297	1.01227	1.05359	0.979611	1.04938	1.01776	1.04206	0.918788	1.01258	1.02204	1.0143	0.99223	0.966765	0.99233	1.01521
511	chr2	60766101	61371602	0.955137	1.03252	0.936318	0.980493	1.01116	0.997802	1.0144	1.00421	0.979513	1.01116	0.959445	0.94535	1.01511	0.990545	0.99372	1.00904	0.980689	1.23837	0.977165	1.05096	0.986492	1.00854	0.765137	0.959829	0.988566	0.967539	1.0003	0.984521	1.02357	1.01086	1.01157	0.980297	1.01227	1.05359	0.979611	1.04938	1.01776	1.04206	0.918788	1.01258	1.02204	1.0143	0.99223	0.966765	0.99233	1.01521
512	chr2	61371603	61963438	0.955137	1.03252	0.936318	0.980493	1.01116	0.997802	1.0144	1.00421	0.979513	1.01116	0.959445	0.94535	1.01511	0.990545	0.99372	1.00904	0.980689	1.23837	0.977165	1.05096	0.986492	1.00854	0.765137	0.959829	0.988566	0.967539	1.0003	0.984521	1.02357	1.01086	1.01157	0.980297	1.01227	1.05359	0.979611	1.04938	1.01776	1.04206	0.918788	1.01258	1.02204	1.0143	0.99223	0.966765	0.99233	1.01521
513	chr2	61963439	62528246	0.955137	1.03252	0.936318	0.980493	1.01116	0.997802	1.0144	1.00421	0.979513	1.01116	0.959445	0.94535	1.01511	0.990545	0.99372	1.00904	0.980689	1.23837	0.977165	1.05096	0.986492	1.00854	0.765137	0.959829	0.988566	0.967539	1.0003	0.984521	1.02357	1.01086	1.01157	0.980297	1.01227	1.05359	0.979611	1.04938	1.01776	1.04206	0.918788	1.01258	1.02204	1.0143	0.99223	0.966765	0.99233	1.01521
514	chr2	62528247	63091836	0.955137	1.03252	0.936318	0.980493	1.01116	0.997802	1.0144	1.00421	0.979513	1.01116	0.959445	0.94535	1.01511	0.990545	0.99372	1.00904	0.980689	1.23837	0.977165	1.05096	0.986492	1.00854	0.765137	0.959829	0.988566	0.967539	1.0003	0.984521	1.02357	1.01086	1.01157	0.980297	1.01227	1.05359	0.979611	1.04938	1.01776	1.04206	0.918788	1.01258	1.02204	1.0143	0.99223	0.966765	0.99233	1.01521
515	chr2	63091837	63693974	0.955137	1.03252	0.936318	0.980493	1.01116	0.997802	1.0144	1.00421	0.979513	1.01116	0.959445	0.94535	1.01511	0.990545	0.99372	1.00904	0.980689	1.23837	0.977165	1.05096	0.986492	1.00854	0.765137	0.959829	0.988566	0.967539	1.0003	0.984521	1.02357	1.01086	1.01157	0.980297	1.01227	1.05359	0.979611	1.04938	1.01776	1.04206	0.918788	1.01258	1.02204	1.0143	0.99223	0.966765	0.99233	1.01521
516	chr2	63693975	64299928	0.955137	1.03252	0.936318	0.980493	1.01116	0.997802	1.0144	1.00421	0.979513	1.01116	0.959445	0.94535	1.01511	0.990545	0.99372	1.00904	0.980689	1.23837	0.977165	1.05096	0.986492	1.00854	0.765137	0.959829	0.988566	0.967539	1.0003	0.984521	1.02357	1.01086	1.01157	0.980297	1.01227	1.05359	0.979611	1.04938	1.01776	1.04206	0.918788	1.01258	1.02204	1.0143	0.99223	0.966765	0.99233	1.01521
517	chr2	64299929	64856705	0.955137	1.03252	0.936318	0.980493	1.01116	0.997802	1.0144	1.00421	0.979513	1.01116	0.959445	0.94535	1.01511	0.990545	0.99372	1.00904	0.980689	1.23837	0.977165	1.05096	0.986492	1.00854	0.765137	0.959829	0.988566	0.967539	1.0003	0.984521	1.02357	1.01086	1.01157	0.980297	1.01227	1.05359	0.979611	1.04938	1.01776	1.04206	0.918788	1.01258	1.02204	1.0143	0.99223	0.966765	0.99233	1.01521
518	chr2	64856706	65395037	0.955137	1.03252	0.936318	0.980493	1.01116	0.997802	1.0144	1.00421	0.979513	1.01116	0.959445	0.94535	1.01511	0.990545	0.99372	1.00904	0.980689	1.23837	0.977165	1.05096	0.986492	1.00854	0.765137	0.959829	0.988566	0.967539	1.0003	0.984521	1.02357	1.01086	1.01157	0.980297	1.01227	1.05359	0.979611	1.04938	1.01776	1.04206	0.918788	1.01258	1.02204	1.0143	0.99223	0.966765	0.99233	1.01521
519	chr2	65395038	65975717	0.955137	1.03252	0.936318	0.980493	1.01116	0.997802	1.0144	1.00421	0.979513	1.01116	0.959445	0.94535	1.01511	0.990545	0.99372	1.00904	0.980689	1.23837	0.977165	1.05096	0.986492	1.00854	0.765137	0.959829	0.988566	0.967539	1.0003	0.984521	1.02357	1.01086	1.01157	0.980297	1.01227	1.05359	0.979611	1.04938	1.01776	1.04206	0.918788	1.01258	1.02204	1.0143	0.99223	0.966765	0.99233	1.01521
520	chr2	65975718	66532901	0.955137	1.03252	0.936318	0.980493	1.01116	0.997802	1.0144	1.00421	0.979513	1.01116	0.959445	0.94535	1.01511	0.990545	0.99372	1.00904	0.980689	1.23837	0.977165	1.05096	0.986492	1.00854	0.765137	0.959829	0.988566	0.967539	1.0003	0.984521	1.02357	1.01086	1.01157	0.980297	1.01227	1.05359	0.979611	1.04938	1.01776	1.04206	0.918788	1.01258	1.02204	1.0143	0.99223	0.966765	0.99233	1.01521
521	chr2	66532902	67114299	0.955137	1.03252	0.936318	0.980493	1.01116	0.997802	1.0144	1.00421	0.979513	1.01116	0.959445	0.94535	1.01511	0.990545	0.99372	1.00904	0.980689	1.23837	0.977165	1.05096	0.986492	1.00854	0.765137	0.959829	0.988566	0.967539	1.0003	0.984521	1.02357	1.01086	1.01157	0.980297	1.01227	1.05359	0.979611	1.04938	1.01776	1.04206	0.918788	1.01258	1.02204	1.0143	0.99223	0.966765	0.99233	1.01521
522	chr2	67114300	67665165	0.955137	1.03252	0.936318	0.980493	1.01116	0.997802	1.0144	1.00421	0.979513	1.01116	0.959445	0.94535	1.01511	0.990545	0.99372	1.00904	0.980689	1.23837	0.977165	1.05096	0.986492	1.00854	0.765137	0.959829	0.988566	0.967539	1.0003	0.984521	1.02357	1.01086	1.01157	0.980297	1.01227	1.05359	0.979611	1.04938	1.01776	1.04206	0.918788	1.01258	1.02204	1.0143	0.99223	0.966765	0.99233	1.01521
523	chr2	67665166	68186107	0.955137	1.03252	0.936318	0.980493	1.01116	0.997802	1.0144	1.00421	0.979513	1.01116	0.959445	0.94535	1.01511	0.990545	0.99372	1.00904	0.980689	1.23837	0.977165	1.05096	0.986492	1.00854	0.765137	0.959829	0.988566	0.967539	1.0003	0.984521	1.02357	1.01086	1.01157	0.980297	1.01227	1.05359	0.979611	1.04938	1.01776	1.04206	0.918788	1.01258	1.02204	1.0143	0.99223	0.966765	0.99233	1.01521
524	chr2	68186108	68787302	0.955137	1.03252	0.936318	0.980493	1.01116	0.997802	1.0144	1.00421	0.979513	1.01116	0.959445	0.94535	1.01511	0.990545	0.99372	1.00904	0.980689	1.23837	0.977165	1.05096	0.986492	1.00854	0.765137	0.959829	0.988566	0.967539	1.0003	0.984521	1.02357	1.01086	1.01157	0.980297	1.01227	1.05359	0.979611	1.04938	1.01776	1.04206	0.918788	1.01258	1.02204	1.0143	0.99223	0.966765	0.99233	1.01521
525	chr2	68787303	69331267	0.955137	1.03252	0.936318	0.980493	1.01116	0.997802	1.0144	1.00421	0.979513	1.01116	0.959445	0.94535	1.01511	0.990545	0.99372	1.00904	0.980689	1.23837	0.977165	1.05096	0.986492	1.00854	0.954278	0.959829	0.988566	0.967539	1.0003	0.984521	1.02357	1.01086	1.01157	0.980297	1.01227	1.05359	0.979611	1.04938	1.01776	1.04206	0.918788	1.01258	1.02204	1.0143	0.99223	0.966765	0.99233	1.01521
526	chr2	69331268	69848186	0.955137	1.03252	0.936318	0.980493	1.01116	0.997802	1.0144	1.00421	0.979513	1.01116	0.959445	0.94535	1.01511	0.990545	0.99372	1.00904	0.980689	1.01643	0.977165	1.05096	0.986492	1.00854	0.954278	0.959829	0.988566	0.967539	1.0003	0.984521	1.02357	1.01086	1.01157	0.980297	1.01227	1.05359	0.979611	1.04938	1.01776	1.04206	0.918788	1.01258	1.02204	1.0143	0.99223	0.966765	0.99233	1.01521
527	chr2	69848187	70399683	0.955137	1.03252	0.936318	0.980493	1.01116	0.997802	1.0144	1.00421	0.979513	1.01116	0.959445	0.94535	1.01511	0.990545	0.99372	1.00904	0.980689	1.01643	0.977165	1.05096	0.986492	1.00854	0.954278	0.959829	0.988566	0.967539	1.0003	0.984521	1.02357	1.01086	1.01157	0.980297	1.01227	1.05359	0.979611	1.04938	1.01776	1.04206	0.918788	1.01258	1.02204	1.0143	0.99223	0.966765	0.99233	1.01521
528	chr2	70399684	70925997	0.955137	1.03252	0.936318	0.980493	1.01116	0.997802	1.0144	1.00421	0.979513	1.01116	0.959445	0.94535	1.01511	0.990545	0.99372	1.00904	0.980689	1.01643	0.977165	1.05096	0.986492	1.00854	0.954278	0.959829	0.988566	0.967539	1.0003	0.984521	1.02357	1.01086	1.01157	0.980297	1.01227	1.05359	0.979611	1.04938	1.01776	1.04206	0.918788	1.01258	1.02204	1.0143	0.99223	0.966765	0.99233	1.01521
529	chr2	70925998	71466266	0.955137	1.03252	0.936318	0.980493	1.01116	0.997802	1.0144	1.00421	0.979513	1.01116	0.959445	0.94535	1.01511	0.990545	0.99372	1.00904	0.980689	1.01643	0.977165	1.05096	0.986492	1.00854	0.954278	0.959829	0.988566	0.967539	1.0003	0.984521	1.02357	1.01086	1.01157	0.980297	1.01227	1.05359	0.979611	1.04938	1.01776	1.04206	0.918788	1.01258	1.02204	1.0143	0.99223	0.966765	0.99233	1.01521
530	chr2	71466267	72019041	0.955137	1.03252	0.936318	0.980493	1.01116	0.997802	1.0144	1.00421	0.979513	1.01116	0.959445	0.94535	1.01511	0.990545	0.99372	1.00904	0.980689	1.01643	0.977165	1.05096	0.986492	1.00854	0.954278	0.959829	0.988566	0.967539	1.0003	0.984521	1.02357	1.01086	1.01157	0.980297	1.01227	1.05359	0.979611	1.04938	1.01776	1.04206	0.918788	1.01258	1.02204	1.0143	0.99223	0.966765	0.99233	1.01521
531	chr2	72019042	72560515	0.955137	1.03252	0.936318	0.980493	1.01116	0.997802	1.0144	1.00421	0.979513	1.01116	0.959445	0.94535	1.01511	0.990545	0.99372	1.00904	0.980689	1.01643	0.977165	1.05096	0.986492	1.00854	0.954278	0.959829	0.988566	0.967539	1.0003	0.984521	1.02357	1.01086	1.01157	0.980297	1.01227	1.05359	0.979611	1.04938	1.01776	1.04206	0.918788	1.01258	1.02204	1.0143	0.99223	0.966765	0.99233	1.01521
532	chr2	72560516	73127374	0.955137	1.03252	0.936318	0.980493	1.01116	0.997802	1.0144	1.00421	0.979513	1.01116	0.959445	0.94535	1.01511	0.990545	0.99372	1.00904	0.980689	1.01643	0.977165	1.05096	0.986492	1.00854	0.954278	0.959829	0.988566	0.967539	1.0003	0.984521	1.02357	1.01086	1.01157	0.980297	1.01227	1.05359	0.979611	1.04938	1.01776	1.04206	0.918788	1.01258	1.02204	1.0143	0.99223	0.966765	0.99233	1.01521
533	chr2	73127375	73681096	0.955137	1.03252	0.936318	0.980493	1.01116	0.997802	1.0144	1.00421	0.979513	1.01116	0.959445	0.94535	1.01511	0.990545	0.99372	1.00904	0.980689	1.01643	0.977165	1.05096	0.986492	1.00854	0.954278	0.959829	0.988566	0.967539	1.0003	0.984521	1.02357	1.01086	1.01157	0.980297	1.01227	1.05359	0.979611	1.04938	1.01776	1.04206	0.918788	1.01258	1.02204	1.0143	0.99223	0.966765	0.99233	1.01521
534	chr2	73681097	74197867	0.955137	1.03252	0.936318	0.980493	1.01116	0.997802	1.0144	1.00421	0.979513	1.01116	0.959445	0.94535	1.01511	0.990545	0.99372	1.00904	0.980689	1.01643	0.977165	1.05096	0.986492	1.00854	0.954278	0.959829	0.988566	0.967539	1.0003	0.984521	1.02357	1.01086	1.01157	0.980297	1.01227	1.05359	0.979611	1.04938	1.01776	1.04206	0.918788	1.01258	1.02204	1.0143	0.99223	0.966765	0.99233	1.01521
535	chr2	74197868	74739669	0.955137	1.03252	0.936318	0.980493	1.01116	0.997802	1.0144	1.00421	0.979513	1.01116	0.959445	0.94535	1.01511	0.990545	0.99372	1.00904	0.980689	1.01643	0.977165	1.05096	0.986492	1.00854	0.954278	0.959829	0.988566	0.967539	1.0003	0.984521	1.02357	1.01086	1.01157	0.980297	1.01227	1.05359	0.979611	1.04938	1.01776	1.04206	0.918788	1.01258	1.02204	1.0143	0.99223	0.966765	0.99233	1.01521
536	chr2	74739670	75274397	0.955137	1.03252	0.936318	0.980493	1.01116	0.997802	1.0144	1.00421	0.979513	1.01116	0.959445	0.94535	1.01511	0.990545	0.99372	1.00904	0.980689	1.01643	0.977165	1.05096	0.986492	1.00854	0.954278	0.959829	0.988566	0.967539	1.0003	0.984521	1.02357	1.01086	1.01157	0.980297	1.01227	1.05359	0.979611	1.04938	1.01776	1.04206	0.918788	1.01258	1.02204	1.0143	0.99223	0.966765	0.99233	1.01521
537	chr2	75274398	75824412	0.955137	1.03252	0.936318	0.980493	1.01116	0.997802	1.0144	1.00421	0.979513	1.01116	0.959445	0.94535	1.01511	0.990545	0.99372	1.00904	0.980689	1.01643	0.977165	1.05096	0.986492	1.00854	0.954278	0.959829	0.988566	0.967539	1.0003	0.984521	1.02357	1.01086	1.01157	0.980297	1.01227	1.05359	0.979611	1.04938	1.01776	1.04206	0.918788	1.01258	1.02204	1.0143	0.99223	0.966765	0.99233	1.01521
538	chr2	75824413	76402788	0.955137	1.03252	0.936318	0.980493	1.01116	0.997802	1.0144	1.00421	0.979513	1.01116	0.959445	0.94535	1.01511	0.990545	0.99372	1.00904	0.980689	1.01643	0.977165	1.05096	1.13077	1.00854	0.954278	0.959829	0.988566	0.967539	1.0003	0.984521	1.02357	1.01086	1.01157	0.980297	1.01227	1.05359	0.979611	1.04938	1.01776	1.04206	0.918788	1.01258	1.02204	1.0143	0.99223	0.966765	0.99233	1.01521
539	chr2	76402789	77005801	0.955137	1.03252	0.936318	0.980493	1.01116	0.997802	1.0144	1.00421	0.979513	1.01116	0.959445	0.94535	1.01511	0.990545	0.99372	1.00904	0.980689	1.01643	0.977165	1.05096	1.13077	1.00854	1.06364	0.959829	0.988566	0.967539	1.0003	0.984521	1.02357	1.01086	1.01157	0.980297	1.01227	1.05359	0.979611	1.04938	1.01776	1.04206	0.918788	1.01258	1.02204	1.0143	0.99223	0.966765	0.99233	1.01521
540	chr2	77005802	77635480	0.955137	1.03252	0.936318	0.980493	1.01116	0.997802	1.0144	1.00421	0.979513	1.01116	0.959445	0.94535	1.01511	0.990545	0.99372	1.00904	0.980689	1.01643	0.977165	1.05096	1.13077	1.00854	1.06364	0.959829	0.988566	0.967539	1.0003	0.984521	1.02357	1.01086	1.01157	0.980297	1.01227	1.05359	0.979611	1.04938	1.01776	1.04206	0.918788	1.01258	1.02204	1.0143	0.99223	0.966765	0.99233	1.01521
541	chr2	77635481	78298586	0.955137	1.03252	0.936318	0.980493	1.01116	0.997802	1.0144	1.00421	0.979513	1.01116	0.959445	0.94535	1.01511	0.990545	0.99372	1.00904	0.980689	1.01643	0.977165	1.05096	1.13077	1.00854	1.06364	0.959829	0.988566	0.967539	1.0003	0.984521	1.02357	1.01086	1.01157	0.980297	1.01227	1.05359	0.979611	1.04938	1.01776	1.04206	0.918788	1.01258	1.02204	1.0143	0.99223	0.966765	0.99233	1.01521
542	chr2	78298587	78949255	0.955137	1.03252	0.936318	0.980493	1.01116	0.997802	1.0144	1.00421	0.979513	1.01116	0.959445	0.94535	1.01511	0.990545	0.99372	1.00904	0.980689	1.01643	0.977165	1.05096	1.13077	1.00854	1.06364	0.959829	0.988566	0.967539	1.0003	0.984521	1.02357	1.01086	1.01157	0.980297	1.01227	1.05359	0.979611	1.04938	1.01776	1.04206	0.918788	1.01258	1.02204	1.0143	0.99223	0.966765	0.99233	1.01521
543	chr2	78949256	79567436	0.955137	1.03252	0.936318	0.980493	1.01116	0.997802	1.0144	1.00421	0.979513	1.01116	0.959445	0.94535	1.01511	0.990545	0.99372	1.00904	0.980689	1.01643	0.977165	1.05096	1.13077	1.00854	1.06364	0.959829	0.988566	0.967539	1.0003	0.984521	1.02357	1.01086	1.01157	0.980297	1.01227	1.05359	0.979611	1.04938	1.01776	1.04206	0.918788	1.01258	1.02204	1.0143	0.99223	0.966765	0.99233	1.01521
544	chr2	79567437	80174024	0.955137	1.03252	0.936318	0.980493	1.01116	0.997802	1.0144	1.00421	0.979513	1.01116	0.959445	0.94535	1.01511	0.990545	0.99372	1.00904	0.980689	1.01643	0.977165	1.05096	1.13077	1.00854	1.06364	0.959829	0.988566	0.967539	1.0003	0.984521	1.02357	1.01086	1.01157	0.980297	1.01227	1.05359	0.979611	1.04938	1.01776	1.04206	0.918788	1.01258	1.02204	1.0143	0.99223	0.966765	0.99233	1.01521
545	chr2	80174025	80737675	0.955137	1.03252	0.936318	0.980493	1.01116	0.997802	1.0144	1.00421	0.979513	1.01116	0.959445	0.94535	1.01511	0.990545	0.99372	1.00904	0.980689	1.01643	0.977165	1.05096	1.13077	1.00854	1.06364	0.959829	0.988566	0.967539	1.0003	0.984521	1.02357	1.01086	1.01157	0.980297	1.01227	1.05359	0.979611	1.04938	1.01776	1.04206	0.918788	1.01258	1.02204	1.0143	0.99223	0.966765	0.99233	1.01521
546	chr2	80737676	81322909	0.955137	1.03252	0.936318	0.980493	1.01116	0.997802	1.0144	1.00421	0.979513	1.01116	0.959445	0.94535	1.01511	0.990545	0.99372	1.00904	0.980689	1.01643	0.977165	1.05096	1.13077	1.00854	1.06364	0.959829	0.988566	0.967539	1.0003	0.984521	1.02357	1.01086	1.01157	0.980297	1.01227	1.05359	0.979611	1.04938	1.01776	1.04206	0.918788	1.01258	1.02204	1.0143	0.99223	0.966765	0.99233	1.01521
547	chr2	81322910	81967414	0.955137	1.03252	0.936318	0.980493	1.01116	0.997802	1.0144	1.00421	0.979513	1.01116	0.959445	0.94535	1.01511	0.990545	0.99372	1.00904	0.980689	1.01643	0.977165	1.05096	1.13077	1.00854	1.06364	0.959829	0.988566	0.967539	1.0003	0.984521	1.02357	1.01086	1.01157	0.980297	1.01227	1.05359	0.979611	1.04938	1.01776	1.04206	0.918788	1.01258	1.02204	1.0143	0.99223	0.966765	0.99233	1.01521
548	chr2	81967415	82609727	0.955137	1.03252	0.936318	0.980493	1.01116	0.997802	1.0144	1.00421	0.979513	1.01116	0.959445	0.94535	1.01511	0.990545	0.99372	1.00904	0.980689	1.01643	0.977165	1.05096	1.13077	1.00854	1.06364	0.959829	0.988566	0.967539	1.0003	0.984521	1.02357	1.01086	1.01157	0.980297	1.01227	1.05359	0.979611	1.04938	1.01776	1.04206	0.918788	1.01258	1.02204	1.0143	0.99223	0.966765	0.99233	1.01521
549	chr2	82609728	83265518	0.955137	1.03252	0.936318	0.980493	1.01116	0.997802	1.0144	1.00421	0.979513	1.01116	0.959445	0.94535	1.01511	0.990545	0.99372	1.00904	0.980689	1.01643	0.977165	1.05096	1.13077	1.00854	1.06364	0.959829	0.988566	0.967539	1.0003	0.984521	1.02357	1.01086	1.01157	0.980297	1.01227	1.05359	0.979611	1.04938	1.01776	1.04206	0.918788	1.01258	1.02204	1.0143	0.99223	0.966765	0.99233	1.01521
550	chr2	83265519	83915331	0.955137	1.03252	0.936318	0.980493	1.01116	0.997802	1.0144	1.00421	0.979513	1.01116	0.959445	0.94535	1.01511	0.990545	0.99372	1.00904	0.980689	1.01643	0.977165	1.05096	1.13077	1.00854	1.06364	0.959829	0.988566	0.967539	1.0003	0.984521	1.02357	1.01086	1.01157	0.980297	1.01227	1.05359	0.979611	1.04938	1.01776	1.04206	0.918788	1.01258	1.02204	1.0143	0.99223	0.966765	0.99233	1.01521
551	chr2	83915332	84531358	0.955137	1.03252	0.936318	0.980493	1.01116	0.997802	1.0144	1.00421	0.979513	1.01116	0.959445	0.94535	1.01511	0.990545	0.99372	1.00904	0.980689	1.01643	0.977165	1.05096	1.13077	1.00854	1.06364	0.959829	0.988566	0.967539	1.0003	0.984521	1.02357	1.01086	1.01157	0.980297	1.01227	1.05359	0.979611	1.04938	1.01776	1.04206	0.918788	1.01258	1.02204	1.0143	0.99223	0.966765	0.99233	1.01521
552	chr2	84531359	85113634	0.955137	1.03252	0.936318	0.980493	1.01116	0.997802	1.0144	1.00421	0.979513	1.01116	0.959445	0.94535	1.01511	0.990545	0.99372	1.00904	0.980689	1.01643	0.977165	1.05096	1.13077	1.00854	1.06364	0.959829	0.988566	0.967539	1.0003	0.984521	1.02357	1.01086	1.01157	0.980297	1.01227	1.05359	0.979611	1.04938	1.01776	1.04206	0.918788	1.01258	1.02204	1.0143	0.99223	0.966765	0.99233	1.01521
553	chr2	85113635	85662722	0.955137	1.03252	0.936318	0.980493	1.01116	0.997802	1.0144	1.00421	0.979513	1.01116	0.959445	0.94535	1.01511	0.990545	0.99372	1.00904	0.980689	1.01643	0.977165	1.05096	1.13077	1.00854	1.06364	0.959829	0.988566	0.967539	1.0003	0.984521	1.02357	1.01086	1.01157	0.980297	1.01227	1.05359	0.979611	1.04938	1.01776	1.04206	0.918788	1.01258	1.02204	1.0143	0.99223	0.966765	0.99233	1.01521
554	chr2	85662723	86193776	0.955137	1.03252	0.936318	0.980493	1.01116	0.997802	1.0144	1.00421	0.979513	1.01116	0.959445	0.94535	1.01511	0.990545	0.99372	1.00904	0.980689	1.01643	0.977165	1.05096	1.13077	1.00854	1.06364	0.959829	0.988566	0.967539	1.0003	0.984521	1.02357	1.01086	1.01157	0.980297	1.01227	1.05359	0.979611	1.04938	1.01776	1.04206	0.918788	1.01258	1.02204	1.0143	0.99223	0.966765	0.99233	1.01521
555	chr2	86193777	86713141	0.955137	1.03252	0.936318	0.980493	1.01116	0.997802	1.0144	1.00421	0.979513	1.01116	0.959445	0.94535	1.01511	0.990545	0.99372	1.00904	0.980689	1.01643	0.977165	1.05096	1.13077	1.00854	1.06364	0.959829	0.988566	0.967539	1.0003	0.984521	1.02357	1.01086	1.01157	0.980297	1.01227	1.05359	0.979611	1.04938	1.01776	1.04206	0.918788	1.01258	1.02204	1.0143	0.99223	0.966765	0.99233	1.01521
556	chr2	86713142	87244542	0.955137	1.03252	0.936318	0.980493	1.01116	0.997802	1.0144	1.00421	0.979513	1.01116	0.959445	0.94535	1.01511	0.990545	0.99372	1.00904	0.980689	1.01643	0.977165	1.05096	1.13077	1.00854	1.06364	0.959829	0.988566	0.967539	1.0003	0.984521	1.02357	1.01086	1.01157	0.980297	1.01227	1.05359	0.979611	1.04938	1.01776	1.04206	0.918788	1.01258	1.02204	1.0143	0.99223	0.966765	0.99233	1.01521
557	chr2	87244543	87719425	0.955137	1.03252	0.936318	0.980493	1.01116	0.997802	1.0144	1.00421	0.979513	1.01116	0.959445	0.94535	1.01511	0.990545	0.99372	1.00904	0.980689	1.01643	0.977165	1.05096	1.13077	1.00854	1.06364	0.959829	0.988566	0.967539	1.0003	0.984521	1.02357	1.01086	1.01157	0.980297	1.01227	1.05359	0.979611	1.04938	1.01776	1.04206	0.918788	1.01258	1.02204	1.0143	0.99223	0.966765	0.99233	1.01521
558	chr2	87719426	88176626	0.955137	1.03252	0.936318	0.980493	1.01116	0.997802	1.0144	1.00421	0.979513	1.01116	0.959445	0.94535	1.01511	0.990545	0.99372	1.00904	0.980689	1.01643	0.977165	1.05096	1.13077	1.00854	1.06364	0.959829	0.988566	0.967539	1.0003	0.984521	1.02357	1.01086	1.01157	0.980297	1.01227	1.05359	0.979611	1.04938	1.01776	1.04206	0.918788	1.01258	1.02204	1.0143	0.99223	0.966765	0.99233	1.01521
559	chr2	88176627	88762188	0.955137	1.03252	0.936318	0.980493	1.01116	0.997802	1.0144	1.00421	0.979513	1.01116	0.959445	0.94535	1.01511	0.990545	0.99372	1.00904	0.980689	1.01643	0.977165	1.05096	1.13077	1.00854	1.06364	0.959829	0.988566	0.967539	1.0003	0.984521	1.02357	1.01086	1.01157	0.980297	1.01227	1.05359	0.979611	1.04938	1.01776	1.04206	0.918788	1.01258	1.02204	1.0143	0.99223	0.966765	0.99233	1.01521
560	chr2	88762189	89346597	0.955137	1.03252	0.936318	0.980493	1.01116	0.997802	1.0144	1.00421	0.979513	1.01116	0.959445	0.94535	1.01511	0.990545	0.99372	1.00904	0.980689	1.01643	0.977165	1.05096	1.13077	1.00854	1.06364	0.959829	0.988566	0.967539	1.0003	0.984521	1.02357	1.01086	1.01157	0.980297	1.01227	1.05359	0.979611	1.04938	1.01776	1.04206	0.918788	1.01258	1.02204	1.0143	0.99223	0.966765	0.99233	1.01521
561	chr2	89346598	89990370	0.955137	1.03252	0.936318	0.980493	1.01116	0.997802	1.0144	1.00421	0.979513	1.01116	0.959445	0.94535	1.01511	0.990545	0.99372	1.00904	0.980689	1.01643	0.977165	1.05096	1.13077	1.00854	1.06364	0.959829	0.988566	0.967539	1.0003	0.984521	1.02357	1.01086	1.01157	0.980297	1.01227	1.05359	0.979611	1.04938	1.01776	1.04206	0.918788	1.01258	1.02204	1.0143	0.99223	0.966765	0.99233	1.01521
562	chr2	89990371	90376609	0.955137	1.03252	0.936318	0.980493	1.01116	0.997802	1.0144	1.00421	0.979513	1.01116	0.959445	0.94535	1.01511	0.990545	0.99372	1.00904	0.980689	1.01643	0.977165	1.05096	1.13077	1.00854	1.06364	0.959829	0.988566	0.967539	1.0003	0.984521	1.02357	1.01086	1.01157	0.980297	1.01227	1.05359	0.979611	1.04938	1.01776	1.04206	0.918788	1.01258	1.02204	1.0143	0.99223	0.966765	0.99233	1.01521
563	chr2	90376610	91619109	0.955137	1.03252	0.936318	0.980493	1.01116	0.997802	1.0144	1.00421	0.979513	1.01116	0.959445	0.94535	1.01511	0.990545	0.99372	1.00904	0.980689	1.01643	0.977165	1.05096	1.13077	1.00854	1.06364	0.959829	0.988566	0.967539	1.0003	0.984521	1.02357	1.01086	1.01157	0.980297	1.01227	1.05359	0.979611	1.04938	1.01776	1.04206	0.918788	1.01258	1.02204	1.0143	0.99223	0.966765	0.99233	1.01521
564	chr2	91619110	91788864	0.955137	1.03252	0.936318	0.980493	1.01116	0.997802	1.0144	1.00421	0.979513	1.01116	0.959445	0.94535	1.01511	0.990545	0.99372	1.00904	0.980689	1.01643	0.977165	1.05096	1.13077	1.00854	1.06364	0.959829	0.988566	0.967539	1.0003	0.984521	1.02357	1.01086	1.01157	0.980297	1.01227	1.05359	0.979611	1.04938	1.01776	1.04206	0.918788	1.01258	1.02204	1.0143	0.99223	0.966765	0.99233	1.01521
565	chr2	91788865	91968499	0.955137	1.03252	0.936318	0.980493	1.01116	0.997802	1.0144	1.00421	0.979513	1.01116	0.959445	0.94535	1.01511	0.990545	0.99372	1.00904	0.980689	1.01643	0.977165	1.05096	1.13077	1.00854	1.06364	0.959829	0.988566	0.967539	1.0003	0.984521	1.02357	1.01086	1.01157	0.980297	1.01227	1.05359	0.979611	1.04938	1.01776	1.04206	0.918788	1.01258	1.02204	1.0143	0.99223	0.966765	0.99233	1.01521
566	chr2	91968500	92291438	0.955137	1.03252	0.936318	0.980493	1.01116	0.997802	1.0144	1.00421	0.979513	1.01116	0.959445	0.94535	1.01511	0.990545	0.99372	1.00904	0.980689	1.01643	0.977165	1.05096	1.13077	1.00854	1.06364	0.959829	0.988566	0.967539	1.0003	0.984521	1.02357	1.01086	1.01157	0.980297	1.01227	1.05359	0.979611	1.04938	1.01776	1.04206	0.918788	1.01258	1.02204	1.0143	0.99223	0.966765	0.99233	1.01521
567	chr2	92291439	92323508	0.955137	1.03252	0.936318	0.980493	1.01116	0.997802	1.0144	1.00421	0.979513	1.01116	0.959445	0.94535	1.01511	0.990545	0.99372	1.00904	0.980689	1.25295	0.977165	1.05096	1.13077	1.00854	1.06364	0.959829	0.988566	0.967539	1.59042	0.984521	1.02357	1.01086	1.01157	0.980297	1.01227	1.05359	0.979611	1.04938	1.01776	1.04206	0.918788	1.01258	1.02204	1.0143	0.99223	1.63493	0.99233	1.01521
568	chr2	92323509	95739877	0.955137	1.03252	0.936318	0.980493	1.01116	0.997802	1.0144	1.73256	1.37438	1.01116	0.959445	0.94535	1.01511	0.990545	0.99372	1.00904	0.980689	1.25295	0.977165	1.05096	1.13077	1.53864	1.06364	0.959829	0.988566	0.967539	1.59042	0.984521	1.02357	1.01086	1.01157	0.980297	1.01227	1.05359	0.979611	1.04938	1.01776	1.04206	0.918788	1.01258	1.02204	1.0143	0.99223	1.63493	0.99233	1.01521
569	chr2	95739878	96263241	0.955137	1.03252	0.936318	0.980493	1.01116	0.997802	1.0144	1.73256	1.37438	1.01116	0.959445	0.94535	1.01511	0.990545	0.99372	1.00904	0.980689	1.25295	0.977165	1.05096	1.13077	1.53864	1.06364	0.959829	0.988566	0.967539	1.59042	0.984521	1.02357	1.01086	1.01157	0.980297	1.01227	1.05359	0.979611	1.04938	1.01776	1.04206	0.918788	1.01258	1.02204	1.0143	0.99223	1.63493	0.99233	1.01521
570	chr2	96263242	96748874	0.955137	1.03252	0.936318	0.980493	1.01116	0.997802	1.0144	0.990644	0.963002	1.01116	0.959445	0.94535	1.01511	0.990545	0.99372	1.00904	0.980689	1.25295	0.977165	1.05096	1.13077	1.00361	1.06364	0.959829	0.988566	0.967539	1.04875	0.984521	1.02357	1.01086	1.01157	0.980297	1.01227	1.05359	0.979611	1.04938	1.01776	1.04206	0.918788	1.01258	1.02204	1.0143	0.99223	1.01288	0.99233	1.01521
571	chr2	96748875	97323101	0.955137	1.03252	0.936318	0.980493	1.01116	0.997802	1.0144	0.990644	0.963002	1.01116	0.959445	0.94535	1.01511	0.990545	0.99372	1.00904	0.980689	1.25295	0.977165	1.05096	1.13077	1.00361	1.06364	0.959829	0.988566	0.967539	1.04875	0.984521	1.02357	1.01086	1.01157	0.980297	1.01227	1.05359	0.979611	1.04938	1.01776	1.04206	0.918788	1.01258	1.02204	1.0143	0.99223	1.01288	0.99233	1.01521
572	chr2	97323102	97922929	0.955137	1.03252	0.936318	0.980493	1.01116	0.997802	1.0144	0.990644	0.963002	1.01116	0.959445	0.94535	1.01511	0.990545	0.99372	1.00904	0.980689	1.25295	0.977165	1.05096	1.13077	1.00361	1.06364	0.959829	0.988566	0.967539	1.04875	0.984521	1.02357	1.01086	1.01157	0.980297	1.01227	1.05359	0.979611	1.04938	1.01776	1.04206	0.918788	1.01258	1.02204	1.0143	0.99223	1.01288	0.99233	1.01521
573	chr2	97922930	98391350	0.955137	1.03252	0.936318	0.980493	1.01116	0.997802	1.0144	0.990644	0.963002	1.01116	0.959445	0.94535	1.01511	0.990545	0.99372	1.00904	0.980689	1.25295	0.977165	1.05096	1.13077	1.00361	1.06364	0.959829	0.988566	0.967539	1.04875	0.984521	1.02357	1.01086	1.01157	0.980297	1.01227	1.05359	0.979611	1.04938	1.01776	1.04206	0.918788	1.01258	1.02204	1.0143	0.99223	1.01288	0.99233	1.01521
574	chr2	98391351	98952421	0.955137	1.03252	0.936318	0.980493	1.01116	0.997802	1.0144	0.990644	0.963002	1.01116	0.959445	0.94535	1.01511	0.990545	0.99372	1.00904	0.980689	1.25295	0.977165	1.05096	1.13077	1.00361	1.06364	0.959829	0.988566	0.967539	1.04875	0.984521	1.02357	1.01086	1.01157	0.980297	1.01227	1.05359	0.979611	1.04938	1.01776	1.04206	0.918788	1.01258	1.02204	1.0143	0.99223	1.01288	0.99233	1.01521
575	chr2	98952422	99477768	0.955137	1.03252	0.936318	0.980493	1.01116	0.997802	1.0144	0.990644	0.963002	1.01116	0.959445	0.94535	1.01511	0.990545	0.99372	1.00904	0.980689	1.25295	0.977165	1.05096	1.13077	1.00361	1.06364	0.959829	0.988566	0.967539	1.04875	0.984521	1.02357	1.01086	1.01157	0.980297	1.01227	1.05359	0.979611	1.04938	1.01776	1.04206	0.918788	1.01258	1.02204	1.0143	0.99223	1.01288	0.99233	1.01521
576	chr2	99477769	100062227	0.955137	1.03252	0.936318	0.980493	1.01116	0.997802	1.0144	0.990644	0.963002	1.01116	0.959445	0.94535	1.01511	0.990545	0.99372	1.00904	0.980689	1.25295	0.977165	1.05096	1.13077	1.00361	1.06364	0.959829	0.988566	0.967539	1.04875	0.984521	1.02357	1.01086	1.01157	0.980297	1.01227	1.05359	0.979611	1.04938	1.01776	1.04206	0.918788	1.01258	1.02204	1.0143	0.99223	1.01288	0.99233	1.01521
577	chr2	100062228	100616222	0.955137	1.03252	0.936318	0.980493	1.01116	0.997802	1.0144	0.990644	0.963002	1.01116	0.959445	0.94535	1.01511	0.990545	0.99372	1.00904	0.980689	1.25295	0.977165	1.05096	1.13077	1.00361	1.06364	0.959829	0.988566	0.967539	1.04875	0.984521	1.02357	1.01086	1.01157	0.980297	1.01227	1.05359	0.979611	1.04938	1.01776	1.04206	0.918788	1.01258	1.02204	1.0143	0.99223	1.01288	0.99233	1.01521
578	chr2	100616223	101174461	0.955137	1.03252	0.936318	0.980493	1.01116	0.997802	1.0144	0.990644	0.963002	1.01116	0.959445	0.94535	1.01511	0.990545	0.99372	1.00904	0.980689	1.25295	0.977165	1.05096	1.13077	1.00361	1.06364	0.959829	0.988566	0.967539	1.04875	0.984521	1.02357	1.01086	1.01157	0.980297	1.01227	1.05359	0.979611	1.04938	1.01776	1.04206	0.918788	1.01258	1.02204	1.0143	0.99223	1.01288	0.99233	1.01521
579	chr2	101174462	101707352	0.955137	1.03252	0.936318	0.980493	1.01116	0.997802	1.0144	0.990644	0.963002	1.01116	0.959445	0.94535	1.01511	0.990545	0.99372	1.00904	0.980689	1.25295	0.977165	1.05096	1.13077	1.00361	1.06364	0.959829	0.988566	0.967539	1.04875	0.984521	1.02357	1.01086	1.01157	0.980297	1.01227	1.05359	0.979611	1.04938	1.01776	1.04206	0.918788	1.01258	1.02204	1.0143	0.99223	1.01288	0.99233	1.01521
580	chr2	101707353	102269997	0.955137	1.03252	0.936318	0.980493	1.01116	0.997802	1.0144	0.990644	0.963002	1.01116	0.959445	0.94535	1.01511	0.990545	0.99372	1.00904	0.980689	1.25295	0.977165	1.05096	1.13077	1.00361	1.06364	0.959829	0.988566	0.967539	1.04875	0.984521	1.02357	1.01086	1.01157	0.980297	1.01227	1.05359	0.979611	1.04938	1.01776	1.04206	0.918788	1.01258	1.02204	1.0143	0.99223	1.01288	0.99233	1.01521
581	chr2	102269998	102808137	0.955137	1.03252	0.936318	0.980493	1.01116	0.997802	1.0144	0.990644	0.963002	1.01116	0.959445	0.94535	1.01511	0.990545	0.99372	1.00904	0.980689	1.25295	0.977165	1.05096	1.13077	1.00361	1.06364	0.959829	0.988566	0.967539	1.04875	0.984521	1.02357	1.01086	1.01157	0.980297	1.01227	1.05359	0.979611	1.04938	1.01776	1.04206	0.918788	1.01258	1.02204	1.0143	0.99223	1.01288	0.99233	1.01521
582	chr2	102808138	103380847	0.955137	1.03252	0.936318	0.980493	1.01116	0.997802	1.0144	0.990644	0.963002	1.01116	0.959445	0.94535	1.01511	0.990545	0.99372	1.00904	0.980689	1.25295	0.977165	1.05096	1.13077	1.00361	1.06364	0.959829	0.988566	0.967539	1.04875	0.984521	1.02357	1.01086	1.01157	0.980297	1.01227	1.05359	0.979611	1.04938	1.01776	1.04206	0.918788	1.01258	1.02204	1.0143	0.99223	1.01288	0.99233	1.01521
583	chr2	103380848	103958916	0.955137	1.03252	0.936318	0.980493	1.01116	0.997802	1.0144	0.990644	0.963002	1.01116	0.959445	0.94535	1.01511	0.990545	0.99372	1.00904	0.980689	1.25295	0.977165	1.05096	1.13077	1.00361	1.06364	0.959829	0.988566	0.967539	1.04875	0.984521	1.02357	1.01086	1.01157	0.980297	1.01227	1.05359	0.979611	1.04938	1.01776	1.04206	0.918788	1.01258	1.02204	1.0143	0.99223	1.01288	0.99233	1.01521
584	chr2	103958917	104583262	0.955137	1.03252	0.936318	0.980493	1.01116	0.997802	1.0144	0.990644	0.963002	1.01116	0.959445	0.94535	1.01511	0.990545	0.99372	1.00904	0.980689	1.25295	0.977165	1.05096	1.13077	1.00361	1.06364	0.959829	0.988566	0.967539	1.04875	0.984521	1.02357	1.01086	1.01157	0.980297	1.01227	1.05359	0.979611	1.04938	1.01776	1.04206	0.918788	1.01258	1.02204	1.0143	0.99223	1.01288	0.99233	1.01521
585	chr2	104583263	105157092	0.955137	1.03252	0.936318	0.980493	1.01116	0.997802	1.0144	0.990644	0.963002	1.01116	0.959445	0.94535	1.01511	0.990545	0.99372	1.00904	0.980689	1.25295	0.977165	1.05096	1.13077	1.00361	1.06364	0.959829	0.988566	0.967539	1.04875	0.984521	1.02357	1.01086	1.01157	0.980297	1.01227	1.05359	0.979611	1.04938	1.01776	1.04206	0.918788	1.01258	1.02204	1.0143	0.99223	1.01288	0.99233	1.01521
586	chr2	105157093	105733021	0.955137	1.03252	0.936318	0.980493	1.01116	0.997802	1.0144	0.990644	0.963002	1.01116	0.959445	0.94535	1.01511	0.990545	0.99372	1.00904	0.980689	1.25295	0.977165	1.05096	1.13077	1.00361	1.06364	0.959829	0.988566	0.967539	1.04875	0.984521	1.02357	1.01086	1.01157	0.980297	1.01227	1.05359	0.979611	1.04938	1.01776	1.04206	0.918788	1.01258	1.02204	1.0143	0.99223	1.01288	0.99233	1.01521
587	chr2	105733022	106261284	0.955137	1.03252	0.936318	0.980493	1.01116	0.997802	1.0144	0.990644	0.963002	1.01116	0.959445	0.94535	1.01511	0.990545	0.99372	1.00904	0.980689	1.25295	0.977165	1.05096	1.13077	1.00361	1.06364	0.959829	0.988566	0.967539	1.04875	0.984521	1.02357	1.01086	1.01157	0.980297	1.01227	1.05359	0.979611	1.04938	1.01776	1.04206	0.918788	1.01258	1.02204	1.0143	0.99223	1.01288	0.99233	1.01521
588	chr2	106261285	106829510	0.955137	1.03252	0.936318	0.980493	1.01116	0.997802	1.0144	0.990644	0.963002	1.01116	0.959445	0.94535	1.01511	0.990545	0.99372	1.00904	0.980689	1.25295	0.977165	1.05096	1.13077	1.00361	1.06364	0.959829	0.988566	0.967539	1.04875	0.984521	1.02357	1.01086	1.01157	0.980297	1.01227	1.05359	0.979611	1.04938	1.01776	1.04206	0.918788	1.01258	1.02204	1.0143	0.99223	1.01288	0.99233	1.01521
589	chr2	106829511	107372619	0.955137	1.03252	0.936318	0.980493	1.01116	0.997802	1.0144	0.990644	0.963002	1.01116	0.959445	0.94535	1.01511	0.990545	0.99372	1.00904	0.980689	1.25295	0.977165	1.05096	1.13077	1.00361	1.06364	0.959829	0.988566	0.967539	1.04875	0.984521	1.02357	1.01086	1.01157	0.980297	1.01227	1.05359	0.979611	1.04938	1.01776	1.04206	0.918788	1.01258	1.02204	1.0143	0.99223	1.01288	0.99233	1.01521
590	chr2	107372620	107966539	0.955137	1.03252	0.936318	0.980493	1.01116	0.997802	1.0144	0.990644	0.963002	1.01116	0.959445	0.94535	1.01511	0.990545	0.99372	1.00904	0.980689	1.25295	0.977165	1.05096	1.13077	1.00361	1.06364	0.959829	0.988566	0.967539	1.04875	0.984521	1.02357	1.01086	1.01157	0.980297	1.01227	1.05359	0.979611	1.04938	1.01776	1.04206	0.918788	1.01258	1.02204	1.0143	0.99223	1.01288	0.99233	1.01521
591	chr2	107966540	108548870	0.955137	1.03252	0.936318	0.980493	1.01116	0.997802	1.0144	0.990644	0.963002	1.01116	0.959445	0.94535	1.01511	0.990545	0.99372	1.00904	0.980689	1.25295	0.977165	1.05096	1.13077	1.00361	1.06364	0.959829	0.988566	0.967539	1.04875	0.984521	1.02357	1.01086	1.01157	0.980297	1.01227	1.05359	0.979611	1.04938	1.01776	1.04206	0.918788	1.01258	1.02204	1.0143	0.99223	1.01288	0.99233	1.01521
592	chr2	108548871	109143853	0.955137	1.03252	0.936318	0.980493	1.01116	0.997802	1.0144	0.990644	0.963002	1.01116	0.959445	0.94535	1.01511	0.990545	0.99372	1.00904	0.980689	1.25295	0.977165	1.05096	1.13077	1.00361	1.06364	0.959829	0.988566	0.967539	1.04875	0.984521	1.02357	1.01086	1.01157	0.980297	1.01227	1.05359	0.979611	1.04938	1.01776	1.04206	0.918788	1.01258	1.02204	1.0143	0.99223	1.01288	0.99233	1.01521
593	chr2	109143854	109683166	0.955137	1.03252	0.936318	0.980493	1.01116	0.997802	1.0144	0.990644	0.963002	1.01116	0.959445	0.94535	1.01511	0.990545	0.99372	1.00904	0.980689	1.25295	0.977165	1.05096	1.13077	1.00361	1.06364	0.959829	0.988566	0.967539	1.04875	0.984521	1.02357	1.01086	1.01157	0.980297	1.01227	1.05359	0.979611	1.04938	1.01776	1.04206	0.918788	1.01258	1.02204	1.0143	0.99223	1.01288	0.99233	1.01521
594	chr2	109683167	110364666	0.955137	1.03252	0.936318	0.980493	1.01116	0.997802	1.0144	0.990644	0.963002	1.01116	0.959445	0.94535	1.01511	0.990545	0.99372	1.00904	0.980689	1.25295	0.977165	1.05096	1.13077	1.00361	1.06364	0.959829	0.988566	0.967539	1.04875	0.984521	1.02357	1.01086	1.01157	0.980297	1.01227	1.05359	0.979611	1.04938	1.01776	1.04206	0.918788	1.01258	1.02204	1.0143	0.99223	1.01288	0.99233	1.01521
595	chr2	110364667	110790741	0.955137	1.03252	0.936318	0.980493	1.01116	0.997802	1.0144	0.990644	0.963002	1.01116	0.959445	0.94535	1.01511	0.990545	0.99372	1.00904	0.980689	1.25295	0.977165	1.05096	1.13077	1.00361	1.06364	0.959829	0.988566	0.967539	1.04875	0.984521	1.02357	1.01086	1.01157	0.980297	1.01227	1.05359	0.979611	1.04938	1.01776	1.04206	0.918788	1.01258	1.02204	1.0143	0.99223	1.01288	0.99233	1.01521
596	chr2	110790742	111228419	0.955137	1.03252	0.936318	0.980493	1.01116	0.997802	1.0144	0.990644	0.963002	1.01116	0.959445	0.94535	1.01511	0.990545	0.99372	1.00904	0.980689	1.25295	0.977165	1.05096	1.13077	1.00361	1.06364	0.959829	0.988566	0.967539	1.04875	0.984521	1.02357	1.01086	1.01157	0.980297	1.01227	1.05359	0.979611	1.04938	1.01776	1.04206	0.918788	1.01258	1.02204	1.0143	0.99223	1.01288	0.99233	1.01521
597	chr2	111228420	111664300	0.955137	1.03252	0.936318	0.980493	1.01116	0.997802	1.0144	0.990644	0.963002	1.01116	0.959445	0.94535	1.01511	0.990545	0.99372	1.00904	0.980689	1.25295	0.977165	1.05096	1.13077	1.00361	1.06364	0.959829	0.988566	0.967539	1.04875	0.984521	1.02357	1.01086	1.01157	0.980297	1.01227	1.05359	0.979611	1.04938	1.01776	1.04206	0.918788	1.01258	1.02204	1.0143	0.99223	1.01288	0.99233	1.01521
598	chr2	111664301	112149833	0.955137	1.03252	0.936318	0.980493	1.01116	0.997802	1.0144	0.990644	0.963002	1.01116	0.959445	0.94535	1.01511	0.990545	0.99372	1.00904	0.980689	1.25295	0.977165	1.05096	1.13077	1.00361	1.06364	0.959829	0.988566	0.967539	1.04875	0.984521	1.02357	1.01086	1.01157	0.980297	1.01227	1.05359	0.979611	1.04938	1.01776	1.04206	0.918788	1.01258	1.02204	1.0143	0.99223	1.01288	0.99233	1.01521
599	chr2	112149834	112569814	0.955137	1.03252	0.936318	0.980493	1.01116	0.997802	1.0144	0.990644	0.963002	1.01116	0.959445	0.94535	1.01511	0.990545	0.99372	1.00904	0.980689	1.25295	0.977165	1.05096	1.13077	1.00361	1.06364	0.959829	0.988566	0.967539	1.04875	0.984521	1.02357	1.01086	1.01157	0.980297	1.01227	1.05359	0.979611	1.04938	1.01776	1.04206	0.918788	1.01258	1.02204	1.0143	0.99223	1.01288	0.99233	1.01521
600	chr2	112569815	113127312	0.955137	1.03252	0.936318	0.980493	1.01116	0.997802	1.0144	0.990644	0.963002	1.01116	0.959445	0.94535	1.01511	0.990545	0.99372	1.00904	0.980689	1.25295	0.977165	1.05096	1.13077	1.00361	1.06364	0.959829	0.988566	0.967539	1.04875	0.984521	1.02357	1.01086	1.01157	0.980297	1.01227	1.05359	0.979611	1.04938	1.01776	1.04206	0.918788	1.01258	1.02204	1.0143	0.99223	1.01288	0.99233	1.01521
601	chr2	113127313	113642012	0.955137	1.03252	0.936318	0.980493	1.01116	0.997802	1.0144	0.990644	0.963002	1.01116	0.959445	0.94535	1.01511	0.990545	0.99372	1.00904	0.980689	1.25295	0.977165	1.05096	1.13077	1.00361	1.06364	0.959829	0.988566	0.967539	1.04875	0.984521	1.02357	1.01086	1.01157	0.980297	1.01227	1.05359	0.979611	1.04938	1.01776	1.04206	0.918788	1.01258	1.02204	1.0143	0.99223	1.01288	0.99233	1.01521
602	chr2	113642013	114194598	0.955137	1.03252	0.936318	0.980493	1.01116	0.997802	1.0144	0.990644	0.963002	1.01116	0.959445	0.94535	1.01511	0.990545	0.99372	1.00904	0.980689	1.25295	0.977165	1.05096	1.13077	1.00361	1.06364	0.959829	0.988566	0.967539	1.04875	0.984521	1.02357	1.01086	1.01157	0.980297	1.01227	1.05359	0.979611	1.04938	1.01776	1.04206	0.918788	1.01258	1.02204	1.0143	0.99223	1.01288	0.99233	1.01521
603	chr2	114194599	114704318	0.955137	1.03252	0.936318	0.980493	1.01116	0.997802	1.0144	0.990644	0.963002	1.01116	0.959445	0.94535	1.01511	0.990545	0.99372	1.00904	0.980689	1.25295	0.977165	1.05096	1.13077	1.00361	1.06364	0.959829	0.988566	0.967539	1.04875	0.984521	1.02357	1.01086	1.01157	0.980297	1.01227	1.05359	0.979611	1.04938	1.01776	1.04206	0.918788	1.01258	1.02204	1.0143	0.99223	1.01288	0.99233	1.01521
604	chr2	114704319	115271329	0.955137	1.03252	0.936318	0.980493	1.01116	0.997802	1.0144	0.990644	0.963002	1.01116	0.959445	0.94535	1.01511	0.990545	0.99372	1.00904	0.980689	1.25295	0.977165	1.05096	1.13077	1.00361	1.06364	0.959829	0.988566	0.967539	1.04875	0.984521	1.02357	1.01086	1.01157	0.980297	1.01227	1.05359	0.979611	1.04938	1.01776	1.04206	0.918788	1.01258	1.02204	1.0143	0.99223	1.01288	0.99233	1.01521
605	chr2	115271330	115868512	0.955137	1.03252	0.936318	0.980493	1.01116	0.997802	1.0144	0.990644	0.963002	1.01116	0.959445	0.94535	1.01511	0.990545	0.99372	1.00904	0.980689	1.25295	0.977165	1.05096	1.13077	1.00361	1.06364	0.959829	0.988566	0.967539	1.04875	0.984521	1.02357	1.01086	1.01157	0.980297	1.01227	1.05359	0.979611	1.04938	1.01776	1.04206	0.918788	1.01258	1.02204	1.0143	0.99223	1.01288	0.99233	1.01521
606	chr2	115868513	116515162	0.955137	1.03252	0.936318	0.980493	1.01116	0.997802	1.0144	0.990644	0.963002	1.01116	0.959445	0.94535	1.01511	0.990545	0.99372	1.00904	0.980689	1.25295	0.977165	1.05096	1.13077	1.00361	1.06364	0.959829	0.988566	0.967539	1.04875	0.984521	1.02357	1.01086	1.01157	0.980297	1.01227	1.05359	0.979611	1.04938	1.01776	1.04206	0.918788	1.01258	1.02204	1.0143	0.99223	1.01288	0.99233	1.01521
607	chr2	116515163	117191918	0.955137	1.03252	0.936318	0.980493	1.01116	0.997802	1.0144	0.990644	0.963002	1.01116	0.959445	0.94535	1.01511	0.990545	0.99372	1.00904	0.980689	1.53112	0.977165	1.05096	1.13077	1.00361	1.06364	0.959829	0.988566	0.967539	1.04875	0.984521	1.02357	1.01086	1.01157	0.980297	1.01227	1.05359	0.979611	1.04938	1.01776	1.04206	0.918788	1.01258	1.02204	1.0143	0.99223	1.01288	0.99233	1.01521
608	chr2	117191919	117839082	0.955137	1.03252	0.936318	0.980493	1.01116	0.997802	1.0144	0.990644	0.963002	1.01116	0.959445	0.94535	1.01511	0.990545	0.99372	1.00904	0.980689	1.53112	0.977165	1.05096	1.13077	1.00361	1.06364	0.959829	0.988566	0.967539	1.04875	0.984521	1.02357	1.01086	1.01157	0.980297	1.01227	1.05359	0.979611	1.04938	1.01776	1.04206	0.918788	1.01258	1.02204	1.0143	0.99223	1.01288	0.99233	1.01521
609	chr2	117839083	118447120	0.955137	1.03252	0.936318	0.980493	1.01116	0.997802	1.0144	0.990644	0.963002	1.01116	0.959445	0.94535	1.01511	0.990545	0.99372	1.00904	0.980689	1.53112	0.977165	1.05096	1.13077	1.00361	1.06364	0.959829	0.988566	0.967539	1.04875	0.984521	1.02357	1.01086	1.01157	0.980297	1.01227	1.05359	0.979611	1.04938	1.01776	1.04206	0.918788	1.01258	1.02204	1.0143	0.99223	1.01288	0.99233	1.01521
610	chr2	118447121	119017500	0.955137	1.03252	0.936318	0.980493	1.01116	0.997802	1.0144	0.990644	0.963002	1.01116	0.959445	0.94535	1.01511	0.990545	0.99372	1.00904	0.980689	1.53112	0.977165	1.05096	1.13077	1.00361	1.06364	0.959829	0.988566	0.967539	1.04875	0.984521	1.02357	1.01086	1.01157	0.980297	1.01227	1.05359	0.979611	1.04938	1.01776	1.04206	0.918788	1.01258	1.02204	1.0143	0.99223	1.01288	0.99233	1.01521
611	chr2	119017501	119560105	0.955137	1.03252	0.936318	0.980493	1.01116	0.997802	1.0144	0.990644	0.963002	1.01116	0.959445	0.94535	1.01511	0.990545	0.99372	1.00904	0.980689	1.53112	0.977165	1.05096	1.13077	1.00361	1.06364	0.959829	0.988566	0.967539	1.04875	0.984521	1.02357	1.01086	1.01157	0.980297	1.01227	1.05359	0.979611	1.04938	1.01776	1.04206	0.918788	1.01258	1.02204	1.0143	0.99223	1.01288	0.99233	1.01521
612	chr2	119560106	120133584	0.955137	1.03252	0.936318	0.980493	1.01116	0.997802	1.0144	0.990644	0.963002	1.01116	0.959445	0.94535	1.01511	0.990545	0.99372	1.00904	0.980689	1.53112	0.977165	1.05096	1.13077	1.00361	1.06364	0.959829	0.988566	0.967539	1.04875	0.984521	1.02357	1.01086	1.01157	0.980297	1.01227	1.05359	0.979611	1.04938	1.01776	1.04206	0.918788	1.01258	1.02204	1.0143	0.99223	1.01288	0.99233	1.01521
613	chr2	120133585	120691116	0.955137	1.03252	0.936318	0.980493	1.01116	0.997802	1.0144	0.990644	0.963002	1.01116	0.959445	0.94535	1.01511	0.990545	0.99372	1.00904	0.980689	1.53112	0.977165	1.05096	1.13077	1.00361	1.06364	0.959829	0.988566	0.967539	1.04875	0.984521	1.02357	1.01086	1.01157	0.980297	1.01227	1.05359	0.979611	1.04938	1.01776	1.04206	0.918788	1.01258	1.02204	1.0143	0.99223	1.01288	0.99233	1.01521
614	chr2	120691117	121252446	0.955137	1.03252	0.936318	0.980493	1.01116	0.997802	1.0144	0.990644	0.963002	1.01116	0.959445	0.94535	1.01511	0.990545	0.99372	1.00904	0.980689	1.53112	0.977165	1.05096	1.13077	1.00361	1.06364	0.959829	0.988566	0.967539	1.04875	0.984521	1.02357	1.01086	1.01157	0.980297	1.01227	1.05359	0.979611	1.04938	1.01776	1.04206	0.918788	1.01258	1.02204	1.0143	0.99223	1.01288	0.99233	1.01521
615	chr2	121252447	121773776	0.955137	1.03252	0.936318	0.980493	1.01116	0.997802	1.0144	0.990644	0.963002	1.01116	0.959445	0.94535	1.01511	0.990545	0.99372	1.00904	0.980689	1.53112	0.977165	1.05096	1.13077	1.00361	1.06364	0.959829	0.988566	0.967539	1.04875	0.984521	1.02357	1.01086	1.01157	0.980297	1.01227	1.05359	0.979611	1.04938	1.01776	1.04206	0.918788	1.01258	1.02204	1.0143	0.99223	1.01288	0.99233	1.01521
616	chr2	121773777	122302964	0.955137	1.03252	0.936318	0.980493	1.01116	0.997802	1.0144	0.990644	0.963002	1.01116	0.959445	0.94535	1.01511	0.990545	0.99372	1.00904	0.980689	1.53112	0.977165	1.05096	1.13077	1.00361	1.06364	0.959829	0.988566	0.967539	1.04875	0.984521	1.02357	1.01086	1.01157	0.980297	1.01227	1.05359	0.979611	1.04938	1.01776	1.04206	0.918788	1.01258	1.02204	1.0143	0.99223	1.01288	0.99233	1.01521
617	chr2	122302965	122874003	0.955137	1.03252	0.936318	0.980493	1.01116	0.997802	1.0144	0.990644	0.963002	1.01116	0.959445	0.94535	1.01511	0.990545	0.99372	1.00904	0.980689	1.15131	0.977165	1.05096	1.13077	1.00361	1.06364	0.959829	0.988566	0.967539	1.04875	0.984521	1.02357	1.01086	1.01157	0.980297	1.01227	1.05359	0.979611	1.04938	1.01776	1.04206	0.918788	1.01258	1.02204	1.0143	0.99223	1.01288	0.99233	1.01521
618	chr2	122874004	123441462	0.955137	1.03252	0.936318	0.980493	1.01116	0.997802	1.0144	0.990644	0.963002	1.01116	0.959445	0.94535	1.01511	0.990545	0.99372	1.00904	0.980689	1.15131	0.977165	1.05096	1.13077	1.00361	1.06364	0.959829	0.988566	0.967539	1.04875	0.984521	1.02357	1.01086	1.01157	0.980297	1.01227	1.05359	0.979611	1.04938	1.01776	1.04206	0.918788	1.01258	1.02204	1.0143	0.99223	1.01288	0.99233	1.01521
619	chr2	123441463	124063508	0.955137	1.03252	0.936318	0.980493	1.01116	0.997802	1.0144	0.990644	0.963002	1.01116	0.959445	0.94535	1.01511	0.990545	0.99372	1.00904	0.980689	1.15131	0.977165	1.05096	1.13077	1.00361	1.06364	0.959829	0.988566	0.967539	1.04875	0.984521	1.02357	1.01086	1.01157	0.980297	1.01227	1.05359	0.979611	1.04938	1.01776	1.04206	0.918788	1.01258	1.02204	1.0143	0.99223	1.01288	0.99233	1.01521
620	chr2	124063509	124709236	0.955137	1.03252	0.936318	0.980493	1.01116	0.997802	1.0144	0.990644	0.963002	1.01116	0.959445	0.94535	1.01511	0.990545	0.99372	1.00904	0.980689	1.15131	0.977165	1.05096	1.13077	1.00361	1.06364	0.959829	0.988566	0.967539	1.04875	0.984521	1.02357	1.01086	1.01157	0.980297	1.01227	1.05359	0.979611	1.04938	1.01776	1.04206	0.918788	1.01258	1.02204	1.0143	0.99223	1.01288	0.99233	1.01521
621	chr2	124709237	125326406	0.955137	1.03252	0.936318	0.980493	1.01116	0.997802	1.0144	0.990644	0.963002	1.01116	0.959445	0.94535	1.01511	0.990545	0.99372	1.00904	0.980689	1.15131	0.977165	1.05096	1.13077	1.00361	1.06364	0.959829	0.988566	0.967539	1.04875	0.984521	1.02357	1.01086	1.01157	0.980297	1.01227	1.05359	0.979611	1.04938	1.01776	1.04206	0.918788	1.01258	1.02204	1.0143	0.99223	1.01288	0.99233	1.01521
622	chr2	125326407	125940962	0.955137	1.03252	0.936318	0.980493	1.01116	0.997802	1.0144	0.990644	0.963002	1.01116	0.959445	0.94535	1.01511	0.990545	0.99372	1.00904	0.980689	1.15131	0.977165	1.05096	1.13077	1.00361	1.06364	0.959829	0.988566	0.967539	1.04875	0.984521	1.02357	1.01086	1.01157	0.980297	1.01227	1.05359	0.979611	1.04938	1.01776	1.04206	0.918788	1.01258	1.02204	1.0143	0.99223	1.01288	0.99233	1.01521
623	chr2	125940963	126582813	0.955137	1.03252	0.936318	0.980493	1.01116	0.997802	1.0144	0.990644	0.963002	1.01116	0.959445	0.94535	1.01511	0.990545	0.99372	1.00904	0.980689	1.15131	0.977165	1.05096	1.13077	1.00361	1.06364	0.959829	0.988566	0.967539	1.04875	0.984521	1.02357	1.01086	1.01157	0.980297	1.01227	1.05359	0.979611	1.04938	1.01776	1.04206	0.918788	1.01258	1.02204	1.0143	0.99223	1.01288	0.99233	1.01521
624	chr2	126582814	127221537	0.955137	1.03252	0.936318	0.980493	1.01116	0.997802	1.0144	0.990644	0.963002	1.01116	0.959445	0.94535	1.01511	0.990545	0.99372	1.00904	0.980689	1.15131	0.977165	1.05096	1.13077	1.00361	1.06364	0.959829	0.988566	0.967539	1.04875	0.984521	1.02357	1.01086	1.01157	0.980297	1.01227	1.05359	0.979611	1.04938	1.01776	1.04206	0.918788	1.01258	1.02204	1.0143	0.99223	1.01288	0.99233	1.01521
625	chr2	127221538	127750413	0.955137	1.03252	0.936318	0.980493	1.01116	0.997802	1.0144	0.990644	0.963002	1.01116	0.959445	0.94535	1.01511	0.990545	0.99372	1.00904	0.980689	1.15131	0.977165	1.05096	1.13077	1.00361	1.06364	0.959829	0.988566	0.967539	1.04875	0.984521	1.02357	1.01086	1.01157	0.980297	1.01227	1.05359	0.979611	1.04938	1.01776	1.04206	0.918788	1.01258	1.02204	1.0143	0.99223	1.01288	0.99233	1.01521
626	chr2	127750414	128290847	0.955137	1.03252	0.936318	0.980493	1.01116	0.997802	1.0144	0.990644	0.963002	1.01116	0.959445	0.94535	1.01511	0.990545	0.99372	1.00904	0.980689	1.15131	0.977165	1.05096	1.13077	1.00361	1.06364	0.959829	0.988566	0.967539	1.04875	0.984521	1.02357	1.01086	1.01157	0.980297	1.01227	1.05359	0.979611	1.04938	1.01776	1.04206	0.918788	1.01258	1.02204	1.0143	0.99223	1.01288	0.99233	1.01521
627	chr2	128290848	128855975	0.955137	1.03252	0.936318	0.980493	1.01116	0.997802	1.0144	0.990644	0.963002	1.01116	0.959445	0.94535	1.01511	0.990545	0.99372	1.00904	0.980689	1.15131	0.977165	1.05096	1.13077	1.00361	1.06364	0.959829	0.988566	0.967539	1.04875	0.984521	1.02357	1.01086	1.01157	0.980297	1.01227	1.05359	0.979611	1.04938	1.01776	1.04206	0.918788	1.01258	1.02204	1.0143	0.99223	1.01288	0.99233	1.01521
628	chr2	128855976	129393203	0.955137	1.03252	0.936318	0.980493	1.01116	0.997802	1.0144	0.990644	0.963002	1.01116	0.959445	0.94535	1.01511	0.990545	0.99372	1.00904	0.980689	1.15131	0.977165	1.05096	1.13077	1.00361	1.06364	0.959829	0.988566	0.967539	1.04875	0.984521	1.02357	1.01086	1.01157	0.980297	1.01227	1.05359	0.979611	1.04938	1.01776	1.04206	0.918788	1.01258	1.02204	1.0143	0.99223	1.01288	0.99233	1.01521
629	chr2	129393204	129999158	0.955137	1.03252	0.936318	0.980493	1.01116	0.997802	1.0144	0.990644	0.963002	1.01116	0.959445	0.94535	1.01511	0.990545	0.99372	1.00904	0.980689	1.15131	0.977165	1.05096	1.13077	1.00361	1.06364	0.959829	0.988566	0.967539	1.04875	0.984521	1.02357	1.01086	1.01157	0.980297	1.01227	1.05359	0.979611	1.04938	1.01776	1.04206	0.918788	1.01258	1.02204	1.0143	0.99223	1.01288	0.99233	1.01521
630	chr2	129999159	130586390	0.955137	1.03252	0.936318	0.980493	1.01116	0.997802	1.0144	0.990644	0.963002	1.01116	0.959445	0.94535	1.01511	0.990545	0.99372	1.00904	0.980689	1.15131	0.977165	1.05096	1.13077	1.00361	1.06364	0.959829	0.988566	0.967539	1.04875	0.984521	1.02357	1.01086	1.01157	0.980297	1.01227	1.05359	0.979611	1.04938	1.01776	1.04206	0.918788	1.01258	1.02204	1.0143	0.99223	1.01288	0.99233	1.01521
631	chr2	130586391	131165368	0.955137	1.03252	0.936318	0.980493	1.01116	0.997802	1.0144	0.990644	0.963002	1.01116	0.959445	0.94535	1.01511	0.990545	0.99372	1.00904	0.980689	1.15131	0.977165	1.05096	1.13077	1.00361	1.06364	0.959829	0.988566	0.967539	1.04875	0.984521	1.02357	1.01086	1.01157	0.980297	1.01227	1.05359	0.979611	1.04938	1.01776	1.04206	0.918788	1.01258	1.02204	1.0143	0.99223	1.01288	0.99233	1.01521
632	chr2	131165369	131648763	0.955137	1.03252	0.936318	0.980493	1.01116	0.997802	1.0144	0.990644	0.963002	1.01116	0.959445	0.94535	1.01511	0.990545	0.99372	1.00904	0.980689	1.15131	0.977165	1.05096	1.13077	1.00361	1.06364	0.959829	0.988566	0.967539	1.04875	0.984521	1.02357	1.01086	1.01157	0.980297	1.01227	1.05359	0.979611	1.04938	1.01776	1.04206	0.918788	1.01258	1.02204	1.0143	0.99223	1.01288	0.99233	1.01521
633	chr2	131648764	132242678	0.955137	1.03252	0.936318	0.980493	1.01116	0.997802	1.0144	0.990644	0.963002	1.01116	0.959445	0.94535	1.01511	0.990545	0.99372	1.00904	0.980689	1.15131	0.977165	1.05096	1.13077	1.00361	1.06364	0.959829	0.988566	0.967539	1.04875	0.984521	1.02357	1.01086	1.01157	0.980297	1.01227	1.05359	0.979611	1.04938	1.01776	1.04206	0.918788	1.01258	1.02204	1.0143	0.99223	1.01288	0.99233	1.01521
634	chr2	132242679	132813952	0.955137	1.03252	0.936318	0.980493	1.01116	0.997802	1.0144	0.990644	0.963002	1.01116	0.959445	0.94535	1.01511	0.990545	0.99372	1.00904	0.980689	1.15131	0.977165	1.05096	1.13077	1.00361	1.06364	0.959829	0.988566	0.967539	1.04875	0.984521	1.02357	1.01086	1.01157	0.980297	1.01227	1.05359	0.979611	1.04938	1.01776	1.04206	0.918788	1.01258	1.02204	1.0143	0.99223	1.01288	0.99233	1.01521
635	chr2	132813953	133329190	0.955137	1.03252	0.936318	0.980493	1.01116	0.997802	1.0144	0.990644	0.963002	1.01116	0.959445	0.94535	1.01511	0.990545	0.99372	1.00904	0.980689	1.15131	0.977165	1.05096	1.13077	1.00361	1.06364	0.959829	0.988566	0.967539	1.04875	0.984521	1.02357	1.01086	1.01157	0.980297	1.01227	1.05359	0.979611	1.04938	1.01776	1.04206	0.918788	1.01258	1.02204	1.0143	0.99223	1.01288	0.99233	1.01521
636	chr2	133329191	133879163	0.955137	1.03252	0.936318	0.980493	1.01116	0.997802	1.0144	0.990644	0.963002	1.01116	0.959445	0.94535	1.01511	0.990545	0.99372	1.00904	0.980689	1.15131	0.977165	1.05096	1.13077	1.00361	1.06364	0.959829	0.988566	0.967539	1.04875	0.984521	1.02357	1.01086	1.01157	0.980297	1.01227	1.05359	0.979611	1.04938	1.01776	1.04206	0.918788	1.01258	1.02204	1.0143	0.99223	1.01288	0.99233	1.01521
637	chr2	133879164	134451962	0.955137	1.03252	0.936318	0.980493	1.01116	0.997802	1.0144	0.990644	0.963002	1.01116	0.959445	0.94535	1.01511	0.990545	0.99372	1.00904	0.980689	1.15131	0.977165	1.05096	1.13077	1.00361	1.06364	0.959829	0.988566	0.967539	1.04875	0.984521	1.02357	1.01086	1.01157	0.980297	1.01227	1.05359	0.979611	1.04938	1.01776	1.04206	0.918788	1.01258	1.02204	1.0143	0.99223	1.01288	0.99233	1.01521
638	chr2	134451963	135013951	0.955137	1.03252	0.936318	0.980493	1.01116	0.997802	1.0144	0.990644	0.963002	1.01116	0.959445	0.94535	1.01511	0.990545	0.99372	1.00904	0.980689	1.15131	0.977165	1.05096	0.928207	1.00361	1.06364	0.959829	0.988566	0.967539	1.04875	0.984521	1.02357	1.01086	1.01157	0.980297	1.01227	1.05359	0.979611	1.04938	1.01776	1.04206	0.918788	1.01258	1.02204	1.0143	0.99223	1.01288	0.99233	1.01521
639	chr2	135013952	135582542	0.955137	1.03252	0.936318	0.980493	1.01116	0.997802	1.0144	0.990644	0.963002	1.01116	0.959445	0.94535	1.01511	0.990545	0.99372	1.00904	0.980689	1.15131	0.977165	1.05096	0.928207	1.00361	1.06364	0.959829	0.988566	0.967539	1.04875	0.984521	1.02357	1.01086	1.01157	0.980297	1.01227	1.05359	0.979611	1.04938	1.01776	1.04206	0.918788	1.01258	1.02204	1.0143	0.99223	1.01288	0.99233	1.01521
640	chr2	135582543	136201080	0.955137	1.03252	0.936318	0.980493	1.01116	0.997802	1.0144	0.990644	0.963002	1.01116	0.959445	0.94535	1.01511	0.990545	0.99372	1.00904	0.980689	1.15131	0.977165	1.05096	0.928207	1.00361	1.06364	0.959829	0.988566	0.967539	1.04875	0.984521	1.02357	1.01086	1.01157	0.980297	1.01227	1.05359	0.979611	1.04938	1.01776	1.04206	0.918788	1.01258	1.02204	1.0143	0.99223	1.01288	0.99233	1.01521
641	chr2	136201081	136783721	0.955137	1.03252	0.936318	0.980493	1.01116	0.997802	1.0144	0.990644	0.963002	1.01116	0.959445	0.94535	1.01511	0.990545	0.99372	1.00904	0.980689	1.15131	0.977165	1.05096	0.928207	1.00361	1.06364	0.959829	0.988566	0.967539	1.04875	0.984521	1.02357	1.01086	1.01157	0.980297	1.01227	1.05359	0.979611	1.04938	1.01776	1.04206	0.918788	1.01258	1.02204	1.0143	0.99223	1.01288	0.99233	1.01521
642	chr2	136783722	137353545	0.955137	1.03252	0.936318	0.980493	1.01116	0.997802	1.0144	0.990644	0.963002	1.01116	0.959445	0.94535	1.01511	0.990545	0.99372	1.00904	0.980689	1.15131	0.977165	1.05096	0.928207	1.00361	1.06364	0.959829	0.988566	0.967539	1.04875	0.984521	1.02357	1.01086	1.01157	0.980297	1.01227	1.05359	0.979611	1.04938	1.01776	1.04206	0.918788	1.01258	1.02204	1.0143	0.99223	1.01288	0.99233	1.01521
643	chr2	137353546	137960274	0.955137	1.03252	0.936318	0.980493	1.01116	0.997802	1.0144	0.990644	0.963002	1.01116	0.959445	0.94535	1.01511	0.990545	0.99372	1.00904	0.980689	1.15131	0.977165	1.05096	0.928207	1.00361	1.06364	0.959829	0.988566	0.967539	1.04875	0.984521	1.02357	1.01086	1.01157	0.980297	1.01227	1.05359	0.979611	1.04938	1.01776	1.04206	0.918788	1.01258	1.02204	1.0143	0.99223	1.01288	0.99233	1.01521
644	chr2	137960275	138599213	0.955137	1.03252	0.936318	0.980493	1.01116	0.997802	1.0144	0.990644	0.963002	1.01116	0.959445	0.94535	1.01511	0.990545	0.99372	1.00904	0.980689	1.15131	0.977165	1.05096	0.928207	1.00361	1.06364	0.959829	0.988566	0.967539	1.04875	0.984521	1.02357	1.01086	1.01157	0.980297	1.01227	1.05359	0.979611	1.04938	1.01776	1.04206	0.918788	1.01258	1.02204	1.0143	0.99223	1.01288	0.99233	1.01521
645	chr2	138599214	139194499	0.955137	1.03252	0.936318	0.980493	1.01116	0.997802	1.0144	0.990644	0.963002	1.01116	0.959445	0.94535	1.01511	0.990545	0.99372	1.00904	0.980689	1.15131	0.977165	1.05096	0.928207	1.00361	1.06364	0.959829	0.988566	0.967539	1.04875	0.984521	1.02357	1.01086	1.01157	0.980297	1.01227	1.05359	0.979611	1.04938	1.01776	1.04206	0.918788	1.01258	1.02204	1.0143	0.99223	1.01288	0.99233	1.01521
646	chr2	139194500	139786267	0.955137	1.03252	0.936318	0.980493	1.01116	0.997802	1.0144	0.990644	0.963002	1.01116	0.959445	0.94535	1.01511	0.990545	0.99372	1.00904	0.980689	1.15131	0.977165	1.05096	0.928207	1.00361	1.06364	0.959829	0.988566	0.967539	1.04875	0.984521	1.02357	1.01086	1.01157	0.980297	1.01227	1.05359	0.979611	1.04938	1.01776	1.04206	0.918788	1.01258	1.02204	1.0143	0.99223	1.01288	0.99233	1.01521
647	chr2	139786268	140401708	0.955137	1.03252	0.936318	0.980493	1.01116	0.997802	1.0144	0.990644	0.963002	1.01116	0.959445	0.94535	1.01511	0.990545	0.99372	1.00904	0.980689	1.15131	0.977165	1.05096	0.928207	1.00361	1.06364	0.959829	0.988566	0.967539	1.04875	0.984521	1.02357	1.01086	1.01157	0.980297	1.01227	1.05359	0.979611	1.04938	1.01776	1.04206	0.918788	1.01258	1.02204	1.0143	0.99223	1.01288	0.99233	1.01521
648	chr2	140401709	141029098	0.955137	1.03252	0.936318	0.980493	1.01116	0.997802	1.0144	0.990644	0.963002	1.01116	0.959445	0.94535	1.01511	0.990545	0.99372	1.00904	0.980689	1.15131	0.977165	1.05096	0.928207	1.00361	1.06364	0.959829	0.988566	0.967539	1.04875	0.984521	1.02357	1.01086	1.01157	0.980297	1.01227	1.05359	0.979611	1.04938	1.01776	1.04206	0.918788	1.01258	1.02204	1.0143	0.99223	1.01288	0.99233	1.01521
649	chr2	141029099	141677408	0.955137	1.03252	0.936318	0.980493	1.01116	0.997802	1.0144	0.990644	0.963002	1.01116	0.959445	0.94535	1.01511	0.990545	0.99372	1.00904	0.980689	1.15131	0.977165	1.05096	0.928207	1.00361	1.06364	0.959829	0.988566	0.967539	1.04875	0.984521	1.02357	1.01086	1.01157	0.980297	1.01227	1.05359	0.979611	1.04938	1.01776	1.04206	0.918788	1.01258	1.02204	1.0143	0.99223	1.01288	0.99233	1.01521
650	chr2	141677409	142317290	0.955137	1.03252	0.936318	0.980493	1.01116	0.997802	1.0144	0.990644	0.963002	1.01116	0.959445	0.94535	1.01511	0.990545	0.99372	1.00904	0.980689	1.15131	0.977165	1.05096	0.928207	1.00361	1.06364	0.959829	0.988566	0.967539	1.04875	0.984521	1.02357	1.01086	1.01157	0.980297	1.01227	1.05359	0.979611	1.04938	1.01776	1.04206	0.918788	1.01258	1.02204	1.0143	0.99223	1.01288	0.99233	1.01521
651	chr2	142317291	142934201	0.955137	1.03252	0.936318	0.980493	1.01116	0.997802	1.0144	0.990644	0.963002	1.01116	0.959445	0.94535	1.01511	0.990545	0.99372	1.00904	0.980689	1.15131	0.977165	1.05096	0.928207	1.00361	1.06364	0.959829	0.988566	0.967539	1.04875	0.984521	1.02357	1.01086	1.01157	0.980297	1.01227	1.05359	0.979611	1.04938	1.01776	1.04206	0.918788	1.01258	1.02204	1.0143	0.99223	1.01288	0.99233	1.01521
652	chr2	142934202	143577326	0.955137	1.03252	0.936318	0.980493	1.01116	0.997802	1.0144	0.990644	0.963002	1.01116	0.959445	0.94535	1.01511	0.990545	0.99372	1.00904	0.980689	1.15131	0.977165	1.05096	0.928207	1.00361	1.06364	0.959829	0.988566	0.967539	1.04875	0.984521	1.02357	1.01086	1.01157	0.980297	1.01227	1.05359	0.979611	1.04938	1.01776	1.04206	0.918788	1.01258	1.02204	1.0143	0.99223	1.01288	0.99233	1.01521
653	chr2	143577327	144158111	0.955137	1.03252	0.936318	0.980493	1.01116	0.997802	1.0144	0.990644	0.963002	1.01116	0.959445	0.94535	1.01511	0.990545	0.99372	1.00904	0.980689	1.15131	0.977165	1.05096	0.928207	1.00361	1.06364	0.959829	0.988566	0.967539	1.04875	0.984521	1.02357	1.01086	1.01157	0.980297	1.01227	1.05359	0.979611	1.04938	1.01776	1.04206	0.918788	1.01258	1.02204	1.0143	0.99223	1.01288	0.99233	1.01521
654	chr2	144158112	144712970	0.955137	1.03252	0.936318	0.980493	1.01116	0.997802	1.0144	0.990644	0.963002	1.01116	0.959445	0.94535	1.01511	0.990545	0.99372	1.00904	0.980689	1.15131	0.977165	1.05096	0.928207	1.00361	1.06364	0.959829	0.988566	0.967539	1.04875	0.984521	1.02357	1.01086	1.01157	0.980297	1.01227	1.05359	0.979611	1.04938	1.01776	1.04206	0.918788	1.01258	1.02204	1.0143	0.99223	1.01288	0.99233	1.01521
655	chr2	144712971	145266648	0.955137	1.03252	0.936318	0.980493	1.01116	0.997802	1.0144	0.990644	0.963002	1.01116	0.959445	0.94535	1.01511	0.990545	0.99372	1.00904	0.980689	1.49616	0.977165	1.05096	0.928207	1.00361	1.06364	0.959829	0.988566	0.967539	1.04875	0.984521	1.02357	1.01086	1.01157	0.980297	1.01227	1.05359	0.979611	1.04938	1.01776	1.04206	0.918788	1.01258	1.02204	1.0143	0.99223	1.01288	0.99233	1.01521
656	chr2	145266649	145814222	0.955137	1.03252	0.936318	0.980493	1.01116	0.997802	1.0144	0.990644	0.963002	1.01116	0.959445	0.94535	1.01511	0.990545	0.99372	1.00904	0.980689	1.49616	0.977165	1.05096	0.928207	1.00361	1.06364	0.959829	0.988566	0.967539	1.04875	0.984521	1.02357	1.01086	1.01157	0.980297	1.01227	1.05359	0.979611	1.04938	1.01776	1.04206	0.918788	1.01258	1.02204	1.0143	0.99223	1.01288	0.99233	1.01521
657	chr2	145814223	146384648	0.955137	1.03252	0.936318	0.980493	1.01116	0.997802	1.0144	0.990644	0.963002	1.01116	0.959445	0.94535	1.01511	0.990545	0.99372	1.00904	0.980689	1.49616	0.977165	1.05096	0.928207	1.00361	1.06364	0.959829	0.988566	0.967539	1.04875	0.984521	1.02357	1.01086	1.01157	0.980297	1.01227	1.05359	0.979611	1.04938	1.01776	1.04206	0.918788	1.01258	1.02204	1.0143	0.99223	1.01288	0.99233	1.01521
658	chr2	146384649	146990645	0.955137	1.03252	0.936318	0.980493	1.01116	0.997802	1.0144	0.990644	0.963002	1.01116	0.959445	0.94535	1.01511	0.990545	0.99372	1.00904	0.980689	1.49616	0.977165	1.05096	0.928207	1.00361	1.06364	0.959829	0.988566	0.967539	1.04875	0.984521	1.02357	1.01086	1.01157	0.980297	1.01227	1.05359	0.979611	1.04938	1.01776	1.04206	0.918788	1.01258	1.02204	1.0143	0.99223	1.01288	0.99233	1.01521
659	chr2	146990646	147625670	0.955137	1.03252	0.936318	0.980493	1.01116	0.997802	1.0144	0.990644	0.963002	1.01116	0.959445	0.94535	1.01511	0.990545	0.99372	1.00904	0.980689	1.49616	0.977165	1.05096	0.928207	1.00361	1.06364	0.959829	0.988566	0.967539	1.04875	0.984521	1.02357	1.01086	1.01157	0.980297	1.01227	1.05359	0.979611	1.04938	1.01776	1.04206	0.918788	1.01258	1.02204	1.0143	0.99223	1.01288	0.99233	1.01521
660	chr2	147625671	148217403	0.955137	1.03252	0.936318	0.980493	1.01116	0.997802	1.0144	0.990644	0.963002	1.01116	0.959445	0.94535	1.01511	0.990545	0.99372	1.00904	0.980689	1.49616	0.977165	1.05096	0.928207	1.00361	1.06364	0.959829	0.988566	0.967539	1.04875	0.984521	1.02357	1.01086	1.01157	0.980297	1.01227	1.05359	0.979611	1.04938	1.01776	1.04206	0.918788	1.01258	1.02204	1.0143	0.99223	1.01288	0.99233	1.01521
661	chr2	148217404	148815487	0.955137	1.03252	0.936318	0.980493	1.01116	0.997802	1.0144	0.990644	0.963002	1.01116	0.959445	0.94535	1.01511	0.990545	0.99372	1.00904	0.980689	1.49616	0.977165	1.05096	0.928207	1.00361	1.06364	0.959829	0.988566	0.967539	1.04875	0.984521	1.02357	1.01086	1.01157	0.980297	1.01227	1.05359	0.979611	1.04938	1.01776	1.04206	0.918788	1.01258	1.02204	1.0143	0.99223	1.01288	0.99233	1.01521
662	chr2	148815488	149433742	0.955137	1.03252	0.936318	0.980493	1.01116	0.997802	1.0144	0.990644	0.963002	1.01116	0.959445	0.94535	1.01511	0.990545	0.99372	1.00904	0.980689	1.49616	0.977165	1.05096	0.928207	1.00361	1.06364	0.959829	0.988566	0.967539	1.04875	0.984521	1.02357	1.01086	1.01157	0.980297	1.01227	1.05359	0.979611	1.04938	1.01776	1.04206	0.918788	1.01258	1.02204	1.0143	0.99223	1.01288	0.99233	1.01521
663	chr2	149433743	150075732	0.955137	1.03252	0.936318	0.980493	1.01116	0.997802	1.0144	0.990644	0.963002	1.01116	0.959445	0.94535	1.01511	0.990545	0.99372	1.00904	0.980689	1.49616	0.977165	1.05096	0.928207	1.00361	1.06364	0.959829	0.988566	0.967539	1.04875	0.984521	1.02357	1.01086	1.01157	0.980297	1.01227	1.05359	0.979611	1.04938	1.01776	1.04206	0.918788	1.01258	1.02204	1.0143	0.99223	1.01288	0.99233	1.01521
664	chr2	150075733	150640794	0.955137	1.03252	0.936318	0.980493	1.01116	0.997802	1.0144	0.990644	0.963002	1.01116	0.959445	0.94535	1.01511	0.990545	0.99372	1.00904	0.980689	1.49616	0.977165	1.05096	0.928207	1.00361	1.06364	0.959829	0.988566	0.967539	1.04875	0.984521	1.02357	1.01086	1.01157	0.980297	1.01227	1.05359	0.979611	1.04938	1.01776	1.04206	0.918788	1.01258	1.02204	1.0143	0.99223	1.01288	0.99233	1.01521
665	chr2	150640795	151247288	0.955137	1.03252	0.936318	0.980493	1.01116	0.997802	1.0144	0.990644	0.963002	1.01116	0.959445	0.94535	1.01511	0.990545	0.99372	1.00904	0.980689	1.49616	0.977165	1.05096	0.928207	1.00361	1.06364	0.959829	0.988566	0.967539	1.04875	0.984521	1.02357	1.01086	1.01157	0.980297	1.01227	1.05359	0.979611	1.04938	1.01776	1.04206	0.918788	1.01258	1.02204	1.0143	0.99223	1.01288	0.99233	1.01521
666	chr2	151247289	151796735	0.955137	1.03252	0.936318	0.980493	1.01116	0.997802	1.0144	0.990644	0.963002	1.01116	0.959445	0.94535	1.01511	0.990545	0.99372	1.00904	0.980689	1.49616	0.977165	1.05096	0.928207	1.00361	1.06364	0.959829	0.988566	0.967539	1.04875	0.984521	1.02357	1.01086	1.01157	0.980297	1.01227	1.05359	0.979611	1.04938	1.01776	1.04206	0.918788	1.01258	1.02204	1.0143	0.99223	1.01288	0.99233	1.01521
667	chr2	151796736	152365098	0.955137	1.03252	0.936318	0.980493	1.01116	0.997802	1.0144	0.990644	0.963002	1.01116	0.959445	0.94535	1.01511	0.990545	0.99372	1.00904	0.980689	1.49616	0.977165	1.05096	0.928207	1.00361	1.06364	0.959829	0.988566	0.967539	1.04875	0.984521	1.02357	1.01086	1.01157	0.980297	1.01227	1.05359	0.979611	1.04938	1.01776	1.04206	0.918788	1.01258	1.02204	1.0143	0.99223	1.01288	0.99233	1.01521
668	chr2	152365099	152924203	0.955137	1.03252	0.936318	0.980493	1.01116	0.997802	1.0144	0.990644	0.963002	1.01116	0.959445	0.94535	1.01511	0.990545	0.99372	1.00904	0.980689	1.49616	0.977165	1.05096	0.928207	1.00361	1.06364	0.959829	0.988566	0.967539	1.04875	0.984521	1.02357	1.01086	1.01157	0.980297	1.01227	1.05359	0.979611	1.04938	1.01776	1.04206	0.918788	1.01258	1.02204	1.0143	0.99223	1.01288	0.99233	1.01521
669	chr2	152924204	153482704	0.955137	1.03252	0.936318	0.980493	1.01116	0.997802	1.0144	0.990644	0.963002	1.01116	0.959445	0.94535	1.01511	0.990545	0.99372	1.00904	0.980689	1.49616	0.977165	1.05096	0.928207	1.00361	1.06364	0.959829	0.988566	0.967539	1.04875	0.984521	1.02357	1.01086	1.01157	0.980297	1.01227	1.05359	0.979611	1.04938	1.01776	1.04206	0.918788	1.01258	1.02204	1.0143	0.99223	1.01288	0.99233	1.01521
670	chr2	153482705	154067730	0.955137	1.03252	0.936318	0.980493	1.01116	0.997802	1.0144	0.990644	0.963002	1.01116	0.959445	0.94535	1.01511	0.990545	0.99372	1.00904	0.980689	1.49616	0.977165	1.05096	0.928207	1.00361	1.06364	0.959829	0.988566	0.967539	1.04875	0.984521	1.02357	1.01086	1.01157	0.980297	1.01227	1.05359	0.979611	1.04938	1.01776	1.04206	0.918788	1.01258	1.02204	1.0143	0.99223	1.01288	0.99233	1.01521
671	chr2	154067731	154689401	0.955137	1.03252	0.936318	0.980493	1.01116	0.997802	1.0144	0.990644	0.963002	1.01116	0.959445	0.94535	1.01511	0.990545	0.99372	1.00904	0.980689	1.49616	0.977165	1.05096	0.928207	1.00361	1.06364	0.959829	0.988566	0.967539	1.04875	0.984521	1.02357	1.01086	1.01157	0.980297	1.01227	1.05359	0.979611	1.04938	1.01776	1.04206	0.918788	1.01258	1.02204	1.0143	0.99223	1.01288	0.99233	1.01521
672	chr2	154689402	155324219	0.955137	1.03252	0.936318	0.980493	1.01116	0.997802	1.0144	0.990644	0.963002	1.01116	0.959445	0.94535	1.01511	0.990545	0.99372	1.00904	0.980689	1.49616	0.977165	1.05096	0.928207	1.00361	1.06364	0.959829	0.988566	0.967539	1.04875	0.984521	1.02357	1.01086	1.01157	0.980297	1.01227	1.05359	0.979611	1.04938	1.01776	1.04206	0.918788	1.01258	1.02204	1.0143	0.99223	1.01288	0.99233	1.01521
673	chr2	155324220	155957917	0.955137	1.03252	0.936318	0.980493	1.01116	0.997802	1.0144	0.990644	0.963002	1.01116	0.959445	0.94535	1.01511	0.990545	0.99372	1.00904	0.980689	1.49616	0.977165	1.05096	0.928207	1.00361	1.06364	0.959829	0.988566	0.967539	1.04875	0.984521	1.02357	1.01086	1.01157	0.980297	1.01227	1.05359	0.979611	1.04938	1.01776	1.04206	0.918788	1.01258	1.02204	1.0143	0.99223	1.01288	0.99233	1.01521
674	chr2	155957918	156581214	0.955137	1.03252	0.936318	0.980493	1.01116	0.997802	1.0144	0.990644	0.963002	1.01116	0.959445	0.94535	1.01511	0.990545	0.99372	1.00904	0.980689	1.49616	0.977165	1.05096	0.928207	1.00361	1.06364	0.959829	0.988566	0.967539	1.04875	0.984521	1.02357	1.01086	1.01157	0.980297	1.01227	1.05359	0.979611	1.04938	1.01776	1.04206	0.918788	1.01258	1.02204	1.0143	0.99223	1.01288	0.99233	1.01521
675	chr2	156581215	157185678	0.955137	1.03252	0.936318	0.980493	1.01116	0.997802	1.0144	0.990644	0.963002	1.01116	0.959445	0.94535	1.01511	0.990545	0.99372	1.00904	0.980689	1.49616	0.977165	1.05096	0.928207	1.00361	1.06364	0.959829	0.988566	0.967539	1.04875	0.984521	1.02357	1.01086	1.01157	0.980297	1.01227	1.05359	0.979611	1.04938	1.01776	1.04206	0.918788	1.01258	1.02204	1.0143	0.99223	1.01288	0.99233	1.01521
676	chr2	157185679	157788539	0.955137	1.03252	0.936318	0.980493	1.01116	0.997802	1.0144	0.990644	0.963002	1.01116	0.959445	0.94535	1.01511	0.990545	0.99372	1.00904	0.980689	1.49616	0.977165	1.05096	0.928207	1.00361	1.06364	0.959829	0.988566	0.967539	1.04875	0.984521	1.02357	1.01086	1.01157	0.980297	1.01227	1.05359	0.979611	1.04938	1.01776	1.04206	0.918788	1.01258	1.02204	1.0143	0.99223	1.01288	0.99233	1.01521
677	chr2	157788540	158360473	0.955137	1.03252	0.936318	0.980493	1.01116	0.997802	1.0144	0.990644	0.963002	1.01116	0.959445	0.94535	1.01511	0.990545	0.99372	1.00904	0.980689	1.49616	0.977165	1.05096	0.928207	1.00361	1.06364	0.959829	0.988566	0.967539	1.04875	0.984521	1.02357	1.01086	1.01157	0.980297	1.01227	1.05359	0.979611	1.04938	1.01776	1.04206	0.918788	1.01258	1.02204	1.0143	0.99223	1.01288	0.99233	1.01521
678	chr2	158360474	158939760	0.955137	1.03252	0.936318	0.980493	1.01116	0.997802	1.0144	0.990644	0.963002	1.01116	0.959445	0.94535	1.01511	0.990545	0.99372	1.00904	0.980689	1.49616	0.977165	1.05096	0.928207	1.00361	1.06364	0.959829	0.988566	0.967539	1.04875	0.984521	1.02357	1.01086	1.01157	0.980297	1.01227	1.05359	0.979611	1.04938	1.01776	1.04206	0.918788	1.01258	1.02204	1.0143	0.99223	1.01288	0.99233	1.01521
679	chr2	158939761	159520812	0.955137	1.03252	0.936318	0.980493	1.01116	0.997802	1.0144	0.990644	0.963002	1.01116	0.959445	0.94535	1.01511	0.990545	0.99372	1.00904	0.980689	1.49616	0.977165	1.05096	0.928207	1.00361	1.06364	0.959829	0.988566	0.967539	1.04875	0.984521	1.02357	1.01086	1.01157	0.980297	1.01227	1.05359	0.979611	1.04938	1.01776	1.04206	0.918788	1.01258	1.02204	1.0143	0.99223	1.01288	0.99233	1.01521
680	chr2	159520813	160050929	0.955137	1.03252	0.936318	0.980493	1.01116	0.997802	1.0144	0.990644	0.963002	1.01116	0.959445	0.94535	1.01511	0.990545	0.99372	1.00904	0.980689	1.49616	0.977165	1.05096	0.928207	1.00361	1.06364	0.959829	0.988566	0.967539	1.04875	0.984521	1.02357	1.01086	1.01157	0.980297	1.01227	1.05359	0.979611	1.04938	1.01776	1.04206	0.918788	1.01258	1.02204	1.0143	0.99223	1.01288	0.99233	1.01521
681	chr2	160050930	160669067	0.955137	1.03252	0.936318	0.980493	1.01116	0.997802	1.0144	0.990644	0.963002	1.01116	0.959445	0.94535	1.01511	0.990545	0.99372	1.00904	0.980689	1.49616	0.977165	1.05096	0.928207	1.00361	1.06364	0.959829	0.988566	0.967539	1.04875	0.984521	1.02357	1.01086	1.01157	0.980297	1.01227	1.05359	0.979611	1.04938	1.01776	1.04206	0.918788	1.01258	1.02204	1.0143	0.99223	1.01288	0.99233	1.01521
682	chr2	160669068	161202238	0.955137	1.03252	0.936318	0.980493	1.01116	0.997802	1.0144	0.990644	0.963002	1.01116	0.959445	0.94535	1.01511	0.990545	0.99372	1.00904	0.980689	1.49616	0.977165	1.05096	0.928207	1.00361	1.06364	0.959829	0.988566	0.967539	1.04875	0.984521	1.02357	1.01086	1.01157	0.980297	1.01227	1.05359	0.979611	1.04938	1.01776	1.04206	0.918788	1.01258	1.02204	1.0143	0.99223	1.01288	0.99233	1.01521
683	chr2	161202239	161773459	0.955137	1.03252	0.936318	0.980493	1.01116	0.997802	1.0144	0.990644	0.963002	1.26364	0.959445	0.94535	1.01511	0.990545	0.99372	1.00904	0.980689	1.49616	0.977165	1.05096	0.928207	1.00361	1.06364	0.959829	0.988566	0.967539	1.04875	0.984521	1.02357	1.01086	1.01157	0.980297	1.01227	1.05359	0.979611	1.04938	1.01776	1.04206	0.918788	1.01258	1.02204	1.0143	0.99223	1.01288	0.99233	1.01521
684	chr2	161773460	162325710	0.955137	1.03252	0.936318	0.980493	1.01116	0.997802	1.0144	0.990644	0.963002	1.26364	0.959445	0.94535	1.01511	0.990545	0.99372	1.00904	0.980689	1.49616	0.977165	1.05096	0.928207	1.00361	1.06364	0.959829	0.988566	0.967539	1.04875	0.984521	1.02357	1.01086	1.01157	0.980297	1.01227	1.05359	0.979611	1.04938	1.01776	1.04206	0.918788	1.01258	1.02204	1.0143	0.99223	1.01288	0.99233	1.01521
685	chr2	162325711	162922715	0.955137	1.03252	0.936318	0.980493	1.01116	0.997802	1.0144	0.990644	0.963002	1.26364	0.959445	0.94535	1.01511	0.990545	0.99372	1.00904	0.980689	1.49616	0.977165	1.05096	0.928207	1.00361	1.06364	0.959829	0.988566	0.967539	1.04875	0.984521	1.02357	1.01086	1.01157	0.980297	1.01227	1.05359	0.979611	1.04938	1.01776	1.04206	0.918788	1.01258	1.02204	1.0143	0.99223	1.01288	0.99233	1.01521
686	chr2	162922716	163482820	0.955137	1.03252	0.936318	0.980493	1.01116	0.997802	1.0144	0.990644	0.963002	1.26364	0.959445	0.94535	1.01511	0.990545	0.99372	1.00904	0.980689	1.49616	0.977165	1.05096	0.928207	1.00361	1.06364	0.959829	0.988566	0.967539	1.04875	0.984521	1.02357	1.01086	1.01157	0.980297	1.01227	1.05359	0.979611	1.04938	1.01776	1.04206	0.918788	1.01258	1.02204	1.0143	0.99223	1.01288	0.99233	1.01521
687	chr2	163482821	164063638	0.955137	1.03252	0.936318	0.980493	1.01116	0.997802	1.0144	0.990644	0.963002	1.26364	0.959445	0.94535	1.01511	0.990545	0.99372	1.00904	0.980689	1.49616	0.977165	1.05096	0.928207	1.00361	1.06364	0.959829	0.988566	0.967539	1.04875	0.984521	1.02357	1.01086	1.01157	0.980297	1.01227	1.05359	0.979611	1.04938	1.01776	1.04206	0.918788	1.01258	1.02204	1.0143	0.99223	1.01288	0.99233	1.01521
688	chr2	164063639	164640860	0.955137	1.03252	0.936318	0.980493	1.01116	0.997802	1.0144	0.990644	0.963002	1.26364	0.959445	0.94535	1.01511	0.990545	0.99372	1.00904	0.980689	1.49616	0.977165	1.05096	0.928207	1.00361	1.06364	0.959829	0.988566	0.967539	1.04875	0.984521	1.02357	1.01086	1.01157	0.980297	1.01227	1.05359	0.979611	1.04938	1.01776	1.04206	0.918788	1.01258	1.02204	1.0143	0.99223	1.01288	0.99233	1.01521
689	chr2	164640861	165258046	0.955137	1.03252	0.936318	0.980493	1.01116	0.997802	1.0144	0.990644	0.963002	1.26364	0.959445	0.94535	1.01511	0.990545	0.99372	1.00904	0.980689	1.49616	0.977165	1.05096	0.928207	1.00361	1.06364	0.959829	0.988566	0.967539	1.04875	0.984521	1.02357	1.01086	1.01157	0.980297	1.01227	1.05359	0.979611	1.04938	1.01776	1.04206	0.918788	1.01258	1.02204	1.0143	0.99223	1.01288	0.99233	1.01521
690	chr2	165258047	165858757	0.955137	1.03252	0.936318	0.980493	1.01116	0.997802	1.0144	0.990644	0.963002	1.26364	0.959445	0.94535	1.01511	0.990545	0.99372	1.00904	0.980689	1.49616	0.977165	1.05096	0.928207	1.00361	1.06364	0.959829	0.988566	0.967539	1.04875	0.984521	1.02357	1.01086	1.01157	0.980297	1.01227	1.05359	0.979611	1.04938	1.01776	1.04206	0.918788	1.01258	1.02204	1.0143	0.99223	1.01288	0.99233	1.01521
691	chr2	165858758	166434803	0.955137	1.03252	0.936318	0.980493	1.01116	0.997802	1.0144	0.990644	0.963002	1.26364	0.959445	0.94535	1.01511	0.990545	0.99372	1.00904	0.980689	1.49616	0.977165	1.05096	0.928207	1.00361	1.06364	0.959829	0.988566	0.967539	1.04875	0.984521	1.02357	1.01086	1.01157	0.980297	1.01227	1.05359	0.979611	1.04938	1.01776	1.04206	0.918788	1.01258	1.02204	1.0143	0.99223	1.01288	0.99233	1.01521
692	chr2	166434804	167029764	0.955137	1.03252	0.936318	0.980493	1.01116	0.997802	1.0144	0.990644	0.963002	1.26364	0.959445	0.94535	1.01511	0.990545	0.99372	1.00904	0.980689	1.49616	0.977165	1.05096	0.928207	1.00361	1.06364	0.959829	0.988566	0.967539	1.04875	0.984521	1.02357	1.01086	1.01157	0.980297	1.01227	1.05359	0.979611	1.04938	1.01776	1.04206	0.918788	1.01258	1.02204	1.0143	0.99223	1.01288	0.99233	1.01521
693	chr2	167029765	167655412	0.955137	1.03252	0.936318	0.980493	1.01116	0.997802	1.0144	0.990644	0.963002	1.26364	0.959445	0.94535	1.01511	0.990545	0.99372	1.00904	0.980689	1.49616	0.977165	1.05096	0.928207	1.00361	1.06364	0.959829	0.988566	0.967539	1.04875	0.984521	1.02357	1.01086	1.01157	0.980297	1.01227	1.05359	0.979611	1.04938	1.01776	1.04206	0.918788	1.01258	1.02204	1.0143	0.99223	1.01288	0.99233	1.01521
694	chr2	167655413	168282943	0.955137	1.03252	0.936318	0.980493	1.01116	0.997802	1.0144	0.990644	0.963002	1.26364	0.959445	0.94535	1.01511	0.990545	0.99372	1.00904	0.980689	1.49616	0.977165	1.05096	0.928207	1.00361	1.06364	0.959829	0.988566	0.967539	1.04875	0.984521	1.02357	1.01086	1.01157	0.980297	1.01227	1.05359	0.979611	1.04938	1.01776	1.04206	0.918788	1.01258	1.02204	1.0143	0.99223	1.01288	0.99233	1.01521
695	chr2	168282944	168888168	0.955137	1.03252	0.936318	0.980493	1.01116	0.997802	1.0144	0.990644	0.963002	1.26364	0.959445	0.94535	1.01511	0.990545	0.99372	1.00904	0.980689	1.0847	0.977165	1.05096	0.928207	1.00361	1.06364	0.959829	0.988566	0.967539	1.04875	0.984521	1.02357	1.01086	1.01157	0.980297	1.01227	1.05359	0.979611	1.04938	1.01776	1.04206	0.918788	1.01258	1.02204	1.0143	0.99223	1.01288	0.99233	1.01521
696	chr2	168888169	169455058	0.955137	1.03252	0.936318	0.980493	1.01116	0.997802	1.0144	0.990644	0.963002	1.26364	0.959445	0.94535	1.01511	0.990545	0.99372	1.00904	0.980689	1.0847	0.977165	1.05096	0.928207	1.00361	1.06364	0.959829	0.988566	0.967539	1.04875	0.984521	1.02357	1.01086	1.01157	0.980297	1.01227	1.05359	0.979611	1.04938	1.01776	1.04206	0.918788	1.01258	1.02204	1.0143	0.99223	1.01288	0.99233	1.01521
697	chr2	169455059	170031165	0.955137	1.03252	0.936318	0.980493	1.01116	0.997802	1.0144	0.990644	0.963002	1.26364	0.959445	0.94535	1.01511	0.990545	0.99372	1.00904	0.980689	1.0847	0.977165	1.05096	0.928207	1.00361	1.06364	0.959829	0.988566	0.967539	1.04875	0.984521	1.02357	1.01086	1.01157	0.980297	1.01227	1.05359	0.979611	1.04938	1.01776	1.04206	0.918788	1.01258	1.02204	1.0143	0.99223	1.01288	0.99233	1.01521
698	chr2	170031166	170666653	0.955137	1.03252	0.936318	0.980493	1.01116	0.997802	1.0144	0.990644	0.963002	1.26364	0.959445	0.94535	1.01511	0.990545	0.99372	1.00904	0.980689	1.0847	0.977165	0.917044	0.928207	1.00361	1.06364	0.959829	0.988566	0.967539	1.04875	0.984521	1.02357	1.01086	1.01157	0.980297	1.01227	1.05359	0.979611	1.04938	1.01776	1.04206	0.918788	1.01258	1.02204	1.0143	0.99223	1.01288	0.99233	1.01521
699	chr2	170666654	171260197	0.955137	1.03252	0.936318	0.980493	1.01116	0.997802	1.0144	0.990644	0.963002	1.26364	0.959445	0.94535	1.01511	0.990545	0.99372	1.00904	0.980689	1.0847	0.977165	0.917044	0.928207	1.00361	1.06364	0.959829	0.988566	0.967539	1.04875	0.984521	1.02357	1.01086	1.01157	0.980297	1.01227	1.05359	0.979611	1.04938	1.01776	1.04206	0.918788	1.01258	1.02204	1.0143	0.99223	1.01288	0.99233	1.01521
700	chr2	171260198	171857302	0.955137	1.03252	0.936318	0.980493	1.01116	0.997802	1.0144	0.990644	0.963002	1.26364	0.959445	0.94535	1.01511	0.990545	0.99372	1.00904	0.980689	1.0847	0.977165	0.917044	0.928207	1.00361	1.06364	0.959829	0.988566	0.967539	1.04875	0.984521	1.02357	1.01086	1.01157	0.980297	1.01227	1.05359	0.979611	1.04938	1.01776	1.04206	0.918788	1.01258	1.02204	1.0143	0.99223	1.01288	0.99233	1.01521
701	chr2	171857303	172425821	0.955137	1.03252	0.936318	0.980493	1.01116	0.997802	1.0144	0.990644	0.963002	1.26364	0.959445	0.94535	1.01511	0.990545	0.99372	1.00904	0.980689	1.0847	0.977165	0.917044	0.928207	1.00361	1.06364	0.959829	0.988566	0.967539	1.04875	0.984521	1.02357	1.01086	1.01157	0.980297	1.01227	1.05359	0.979611	1.04938	1.01776	1.04206	0.918788	1.01258	1.02204	1.0143	0.99223	1.01288	0.99233	1.01521
702	chr2	172425822	173009238	0.955137	1.03252	0.936318	0.980493	1.01116	0.997802	1.0144	0.990644	0.963002	1.26364	0.959445	0.94535	1.01511	0.990545	0.99372	1.00904	0.980689	1.0847	0.977165	0.917044	0.928207	1.00361	1.06364	0.959829	0.988566	0.967539	1.04875	0.984521	1.02357	1.01086	1.01157	0.980297	1.01227	1.05359	0.979611	1.04938	1.01776	1.04206	0.918788	1.01258	1.02204	1.0143	0.99223	1.01288	0.99233	1.01521
703	chr2	173009239	173539658	0.955137	1.03252	0.936318	0.980493	1.01116	0.997802	1.0144	0.990644	0.963002	1.26364	0.959445	0.94535	1.01511	0.990545	0.99372	1.00904	0.980689	1.0847	0.977165	0.917044	0.928207	1.00361	1.06364	0.959829	0.988566	0.967539	1.04875	0.984521	1.02357	1.01086	1.01157	0.980297	1.01227	1.05359	0.979611	1.04938	1.01776	1.04206	0.918788	1.01258	1.02204	1.0143	0.99223	1.01288	0.99233	1.01521
704	chr2	173539659	174088898	0.955137	1.03252	0.936318	0.980493	1.01116	0.997802	1.0144	0.990644	0.963002	1.26364	0.959445	0.94535	1.01511	0.990545	0.99372	1.00904	0.980689	1.0847	0.977165	0.917044	0.928207	1.00361	1.06364	0.959829	0.988566	0.967539	1.04875	0.984521	1.02357	1.01086	1.01157	0.980297	1.01227	1.05359	0.979611	1.04938	1.01776	1.04206	0.918788	1.01258	1.02204	1.0143	0.99223	1.01288	0.99233	1.01521
705	chr2	174088899	174656529	0.955137	1.03252	0.936318	0.980493	1.01116	0.997802	1.0144	0.990644	0.963002	1.26364	0.959445	0.94535	1.01511	0.990545	0.99372	1.00904	0.980689	1.0847	0.977165	0.917044	0.928207	1.00361	1.06364	0.959829	0.988566	0.967539	1.04875	0.984521	1.02357	1.01086	1.01157	0.980297	1.01227	1.05359	0.979611	1.04938	1.01776	1.04206	0.918788	1.01258	1.02204	1.0143	0.99223	1.01288	0.99233	1.01521
706	chr2	174656530	175232621	0.955137	1.03252	0.936318	0.980493	1.01116	0.997802	1.0144	0.990644	0.963002	1.26364	0.959445	0.94535	1.01511	0.990545	0.99372	1.00904	0.980689	1.0847	0.977165	0.917044	0.928207	1.00361	1.06364	0.959829	0.988566	0.967539	1.04875	0.984521	1.02357	1.01086	1.01157	0.980297	1.01227	1.05359	0.979611	1.04938	1.01776	1.04206	0.918788	1.01258	1.02204	1.0143	0.99223	1.01288	0.99233	1.01521
707	chr2	175232622	175784204	0.955137	1.03252	0.936318	0.980493	1.01116	0.997802	1.0144	0.990644	0.963002	1.0595	0.959445	0.94535	1.01511	0.990545	0.99372	1.00904	0.980689	1.0847	0.977165	0.917044	0.928207	1.00361	1.06364	0.959829	0.988566	0.967539	1.04875	0.984521	1.02357	1.01086	1.01157	0.980297	1.01227	1.05359	0.979611	1.04938	1.01776	1.04206	0.918788	1.01258	1.02204	1.0143	0.99223	1.01288	0.99233	1.01521
708	chr2	175784205	176376912	0.955137	1.03252	0.936318	0.980493	1.01116	0.997802	1.0144	0.990644	0.963002	1.0595	0.959445	0.94535	1.01511	0.990545	0.99372	1.00904	0.980689	1.0847	0.977165	0.917044	0.928207	1.00361	1.06364	0.959829	0.988566	0.967539	1.04875	0.984521	1.02357	1.01086	1.01157	0.980297	1.01227	1.05359	0.979611	1.04938	1.01776	1.04206	0.918788	1.01258	1.02204	1.0143	0.99223	1.01288	0.99233	1.01521
709	chr2	176376913	176974547	0.955137	1.03252	0.936318	0.980493	1.01116	0.997802	1.0144	0.990644	0.963002	1.0595	0.959445	0.94535	1.01511	0.990545	0.99372	1.00904	0.980689	1.0847	0.977165	0.917044	0.928207	1.00361	1.06364	0.959829	0.988566	0.967539	1.04875	0.984521	1.02357	1.01086	1.01157	0.980297	1.01227	1.05359	0.979611	1.04938	1.01776	1.04206	0.918788	1.01258	1.02204	1.0143	0.99223	1.01288	0.99233	1.01521
710	chr2	176974548	177552906	0.955137	1.03252	0.936318	0.980493	1.01116	0.997802	1.0144	0.990644	0.963002	1.0595	0.959445	0.94535	1.01511	0.990545	0.99372	1.00904	0.980689	1.0847	0.977165	0.917044	0.928207	1.00361	1.06364	0.959829	0.988566	0.967539	1.04875	0.984521	1.02357	1.01086	1.01157	0.980297	1.01227	1.05359	0.979611	1.04938	1.01776	1.04206	0.918788	1.01258	1.02204	1.0143	0.99223	1.01288	0.99233	1.01521
711	chr2	177552907	178098801	0.955137	1.03252	0.936318	0.980493	1.01116	0.997802	1.0144	0.990644	0.963002	1.0595	0.959445	0.94535	1.01511	0.990545	0.99372	1.00904	0.980689	1.0847	0.977165	0.917044	0.928207	1.00361	1.06364	0.959829	0.988566	0.967539	1.04875	0.984521	1.02357	1.01086	1.01157	0.980297	1.01227	1.05359	0.979611	1.04938	1.01776	1.04206	0.918788	1.01258	1.02204	1.0143	0.99223	1.01288	0.99233	1.01521
712	chr2	178098802	178661516	0.955137	1.03252	0.936318	0.980493	1.01116	0.997802	1.0144	0.990644	0.963002	1.0595	0.959445	0.94535	1.01511	0.990545	0.99372	1.00904	0.980689	1.0847	0.977165	0.917044	0.928207	1.00361	1.06364	0.959829	0.988566	0.967539	1.04875	0.984521	1.02357	1.01086	1.01157	0.980297	1.01227	1.05359	0.979611	1.04938	1.01776	1.04206	0.918788	1.01258	1.02204	1.0143	0.99223	1.01288	0.99233	1.01521
713	chr2	178661517	179255210	0.955137	1.03252	0.936318	0.980493	1.01116	0.997802	1.0144	0.990644	0.963002	1.0595	0.959445	0.94535	1.01511	0.990545	0.99372	1.00904	0.980689	1.0847	0.977165	0.917044	0.928207	1.00361	1.06364	0.959829	0.988566	0.967539	1.04875	0.984521	1.02357	1.01086	1.01157	0.980297	1.01227	1.05359	0.979611	1.04938	1.01776	1.04206	0.918788	1.01258	1.02204	1.0143	0.99223	1.01288	0.99233	1.01521
714	chr2	179255211	179774323	0.955137	1.03252	0.936318	0.980493	1.01116	0.997802	1.0144	0.990644	0.963002	1.0595	0.959445	0.94535	1.01511	0.990545	0.99372	1.00904	0.980689	1.0847	0.977165	0.917044	0.928207	1.00361	1.06364	0.959829	0.988566	0.967539	1.04875	0.984521	1.02357	1.01086	1.01157	0.980297	1.01227	1.05359	0.979611	1.04938	1.01776	1.04206	0.918788	1.01258	1.02204	1.0143	0.99223	1.01288	0.99233	1.01521
715	chr2	179774324	180390520	0.955137	1.03252	0.936318	0.980493	1.01116	0.997802	1.0144	0.990644	0.963002	1.0595	0.959445	0.94535	1.01511	0.990545	0.99372	1.00904	0.980689	1.0847	0.977165	0.917044	0.928207	1.00361	1.06364	0.959829	0.988566	0.967539	1.04875	0.984521	1.02357	1.01086	1.01157	0.980297	1.01227	1.05359	0.979611	1.04938	1.01776	1.04206	0.918788	1.01258	1.02204	1.0143	0.99223	1.01288	0.99233	1.01521
716	chr2	180390521	180971365	0.955137	1.03252	0.936318	0.980493	1.01116	0.997802	1.0144	0.990644	0.963002	1.0595	0.959445	0.94535	1.01511	0.990545	0.99372	1.00904	0.980689	1.0847	0.977165	0.917044	0.928207	1.00361	1.06364	0.959829	0.988566	0.967539	1.04875	0.984521	1.02357	1.01086	1.01157	0.980297	1.01227	1.05359	0.979611	1.04938	1.01776	1.04206	0.918788	1.01258	1.02204	1.0143	0.99223	1.01288	0.99233	1.01521
717	chr2	180971366	181571683	0.955137	1.03252	0.936318	0.980493	1.01116	0.997802	1.0144	0.990644	0.963002	1.0595	0.959445	0.94535	1.01511	0.990545	0.99372	1.00904	0.980689	1.0847	0.977165	0.917044	0.928207	1.00361	1.06364	0.959829	0.988566	0.967539	1.04875	0.984521	1.02357	1.01086	1.01157	0.980297	1.01227	1.05359	0.979611	1.04938	1.01776	1.04206	0.918788	1.01258	1.02204	1.0143	0.99223	1.01288	0.99233	1.01521
718	chr2	181571684	182145671	0.955137	1.03252	0.936318	0.980493	1.01116	0.997802	1.0144	0.990644	0.963002	1.0595	0.959445	0.94535	1.01511	0.990545	0.99372	1.00904	0.980689	1.0847	0.977165	0.917044	0.928207	1.00361	1.06364	0.959829	0.988566	0.967539	1.04875	0.984521	1.02357	1.01086	1.01157	0.980297	1.01227	1.05359	0.979611	1.04938	1.01776	1.04206	0.918788	1.01258	1.02204	1.0143	0.99223	1.01288	0.99233	1.01521
719	chr2	182145672	182722619	0.955137	1.03252	0.936318	0.980493	1.01116	0.997802	1.0144	0.990644	0.963002	1.0595	0.959445	0.94535	1.01511	0.990545	0.99372	1.00904	0.980689	1.0847	0.977165	0.917044	0.928207	1.00361	1.06364	0.959829	0.988566	0.967539	1.04875	0.984521	1.02357	1.01086	1.01157	0.980297	1.01227	1.05359	0.979611	1.04938	1.01776	1.04206	0.918788	1.01258	1.02204	1.0143	0.99223	1.01288	0.99233	1.01521
720	chr2	182722620	183301791	0.955137	1.03252	0.936318	0.980493	1.01116	0.997802	1.0144	0.990644	0.963002	1.0595	0.959445	0.94535	1.01511	0.990545	0.99372	1.00904	0.980689	1.0847	0.977165	0.917044	0.928207	1.00361	1.06364	0.959829	0.988566	0.967539	1.04875	0.984521	1.02357	1.01086	1.01157	0.980297	1.01227	1.05359	0.979611	1.04938	1.01776	1.04206	0.918788	1.01258	1.02204	1.0143	0.99223	1.01288	0.99233	1.01521
721	chr2	183301792	183895901	0.955137	1.03252	0.936318	0.980493	1.01116	0.997802	1.0144	0.990644	0.963002	1.0595	0.959445	0.94535	1.01511	0.990545	0.99372	1.00904	0.980689	1.0847	0.977165	0.917044	0.928207	1.00361	1.06364	0.959829	0.988566	0.967539	1.04875	0.984521	1.02357	1.01086	1.01157	0.980297	1.01227	1.05359	0.979611	1.04938	1.01776	1.04206	0.918788	1.01258	1.02204	1.0143	0.99223	1.01288	0.99233	1.01521
722	chr2	183895902	184513520	0.955137	1.03252	0.936318	0.980493	1.01116	0.997802	1.0144	0.990644	0.963002	1.0595	0.959445	0.94535	1.01511	0.990545	0.99372	1.00904	0.980689	1.0847	0.977165	0.917044	0.928207	1.00361	1.06364	0.959829	0.988566	0.967539	1.04875	0.984521	1.02357	1.01086	1.01157	0.980297	1.01227	1.05359	0.979611	1.04938	1.01776	1.04206	0.918788	1.01258	1.02204	1.0143	0.99223	1.01288	0.99233	1.01521
723	chr2	184513521	185162633	0.955137	1.03252	0.936318	0.980493	1.01116	0.997802	1.0144	0.990644	0.963002	1.0595	0.959445	0.94535	1.01511	0.990545	0.99372	1.00904	0.980689	1.0847	0.977165	0.917044	0.928207	1.00361	1.06364	0.959829	0.988566	0.967539	1.04875	0.984521	1.02357	1.01086	1.01157	0.980297	1.01227	1.05359	0.979611	1.04938	1.01776	1.04206	0.918788	1.01258	1.02204	1.0143	0.99223	1.01288	0.99233	1.01521
724	chr2	185162634	185796384	0.955137	1.03252	0.936318	0.980493	1.01116	0.997802	1.0144	0.990644	0.963002	1.0595	0.959445	0.94535	1.01511	0.990545	0.99372	1.00904	0.980689	1.0847	0.977165	0.917044	0.928207	1.00361	1.06364	0.959829	0.988566	0.967539	1.04875	0.984521	1.02357	1.01086	1.01157	0.980297	1.01227	1.05359	0.979611	1.04938	1.01776	1.04206	0.918788	1.01258	1.02204	1.0143	0.99223	1.01288	0.99233	1.01521
725	chr2	185796385	186460487	0.955137	1.03252	0.936318	0.980493	1.01116	0.997802	1.0144	0.990644	0.963002	1.0595	0.959445	0.94535	1.01511	0.990545	0.99372	1.00904	0.980689	1.0847	0.977165	0.917044	0.928207	1.00361	1.06364	0.959829	0.988566	0.967539	1.04875	0.984521	1.02357	1.01086	1.01157	0.980297	1.01227	1.05359	0.979611	1.04938	1.01776	1.04206	0.918788	1.01258	1.02204	1.0143	0.99223	1.01288	0.99233	1.01521
726	chr2	186460488	187083321	0.955137	1.03252	0.936318	0.980493	1.01116	0.997802	1.0144	0.990644	0.963002	1.0595	0.959445	0.94535	1.01511	0.990545	0.99372	1.00904	0.980689	1.0847	0.977165	0.917044	0.928207	1.00361	1.06364	0.959829	0.988566	0.967539	1.04875	0.984521	1.02357	1.01086	1.01157	0.980297	1.01227	1.05359	0.979611	1.04938	1.01776	1.04206	0.918788	1.01258	1.02204	1.0143	0.99223	1.01288	0.99233	1.01521
727	chr2	187083322	187652730	0.955137	1.03252	0.936318	0.980493	1.01116	0.997802	1.0144	0.990644	0.963002	1.0595	0.959445	0.94535	1.01511	0.990545	0.99372	1.00904	0.980689	1.0847	0.977165	0.917044	0.928207	1.00361	1.06364	0.959829	0.988566	0.967539	1.04875	0.984521	1.02357	1.01086	1.01157	0.980297	1.01227	1.05359	0.979611	1.04938	1.01776	1.04206	0.918788	1.01258	1.02204	1.0143	0.99223	1.01288	0.99233	1.01521
728	chr2	187652731	188269509	0.955137	1.03252	0.936318	0.980493	1.01116	0.997802	1.0144	0.990644	0.963002	1.0595	0.959445	0.94535	1.01511	0.990545	0.99372	1.00904	0.980689	1.0847	0.977165	0.917044	0.928207	1.00361	1.06364	0.959829	0.988566	0.967539	1.04875	0.984521	1.02357	1.01086	1.01157	0.980297	1.01227	1.05359	0.979611	1.04938	1.01776	1.04206	0.918788	1.01258	1.02204	1.0143	0.99223	1.01288	0.99233	1.01521
729	chr2	188269510	188886829	0.955137	1.03252	0.936318	0.980493	1.01116	0.997802	1.0144	0.990644	0.963002	1.0595	0.959445	0.94535	1.01511	0.990545	0.99372	1.00904	0.980689	1.0847	0.977165	0.917044	0.928207	1.00361	1.06364	0.959829	0.988566	0.967539	1.04875	0.984521	1.02357	1.01086	1.01157	0.980297	1.01227	1.05359	0.979611	1.04938	1.01776	1.04206	0.918788	1.01258	1.02204	1.0143	0.99223	1.01288	0.99233	1.01521
730	chr2	188886830	189497440	0.955137	1.03252	0.936318	0.980493	1.01116	0.997802	1.0144	0.990644	0.963002	1.0595	0.959445	0.94535	1.01511	0.990545	0.99372	1.00904	0.980689	1.0847	0.977165	0.917044	0.928207	1.00361	1.06364	0.959829	0.988566	0.967539	1.04875	0.984521	1.02357	1.01086	1.01157	0.980297	1.01227	1.05359	0.979611	1.04938	1.01776	1.04206	0.918788	1.01258	1.02204	1.0143	0.99223	1.01288	0.99233	1.01521
731	chr2	189497441	190072748	0.955137	1.03252	0.936318	0.980493	1.01116	0.997802	1.0144	0.990644	0.963002	1.0595	0.959445	0.94535	1.01511	0.990545	0.99372	1.00904	0.980689	1.0847	0.977165	0.917044	0.928207	1.00361	1.06364	0.959829	0.988566	0.967539	1.04875	0.984521	1.02357	1.01086	1.01157	0.980297	1.01227	1.05359	0.979611	1.04938	1.01776	1.04206	0.918788	1.01258	1.02204	1.0143	0.99223	1.01288	0.99233	1.01521
732	chr2	190072749	190660230	0.955137	1.03252	0.936318	0.980493	1.01116	0.997802	1.0144	0.990644	0.963002	1.0595	0.959445	0.94535	1.01511	0.990545	0.99372	1.00904	0.980689	1.0847	0.977165	0.917044	0.928207	1.00361	1.06364	0.959829	0.988566	0.967539	1.04875	0.984521	1.02357	1.01086	1.01157	0.980297	1.01227	1.05359	0.979611	1.04938	1.01776	1.04206	0.918788	1.01258	1.02204	1.0143	0.99223	1.01288	0.99233	1.01521
733	chr2	190660231	191244044	0.955137	1.03252	0.936318	0.980493	1.01116	0.997802	1.0144	0.990644	0.963002	1.0595	0.959445	0.94535	1.01511	0.990545	0.99372	1.00904	0.980689	1.0847	0.977165	0.917044	0.928207	1.00361	1.06364	0.959829	0.988566	0.967539	1.04875	0.984521	1.02357	1.01086	1.01157	0.980297	1.01227	1.05359	0.979611	1.04938	1.01776	1.04206	0.918788	1.01258	1.02204	1.0143	0.99223	1.01288	0.99233	1.01521
734	chr2	191244045	191811578	0.955137	1.03252	0.936318	0.980493	1.01116	0.997802	1.0144	0.990644	0.963002	1.0595	0.959445	0.94535	1.01511	0.990545	0.99372	1.00904	0.980689	1.0847	0.977165	0.917044	0.928207	1.00361	1.06364	0.959829	0.988566	0.967539	1.04875	0.984521	1.02357	1.01086	1.01157	0.980297	1.01227	1.05359	0.979611	1.04938	1.01776	1.04206	0.918788	1.01258	1.02204	1.0143	0.99223	1.01288	0.99233	1.01521
735	chr2	191811579	192364194	0.955137	1.03252	0.936318	0.980493	1.01116	0.997802	1.0144	0.990644	0.963002	1.0595	0.959445	0.94535	1.01511	0.990545	0.99372	1.00904	0.980689	1.0847	0.977165	0.917044	0.928207	1.00361	1.06364	0.959829	0.988566	0.967539	1.04875	0.984521	1.02357	1.01086	1.01157	0.980297	1.01227	1.05359	0.979611	1.04938	1.01776	1.04206	0.918788	1.01258	1.02204	1.0143	0.99223	1.01288	0.99233	1.01521
736	chr2	192364195	192897830	0.955137	1.03252	0.936318	0.980493	1.01116	0.997802	1.0144	0.990644	0.963002	1.0595	0.959445	0.94535	1.01511	0.990545	0.99372	1.00904	0.980689	1.0847	0.977165	0.917044	0.928207	1.00361	1.06364	0.959829	0.988566	0.967539	1.04875	0.984521	1.02357	1.01086	1.01157	0.980297	1.01227	1.05359	0.979611	1.04938	1.01776	1.04206	0.918788	1.01258	1.02204	1.0143	0.99223	1.01288	0.99233	1.01521
737	chr2	192897831	193540465	0.955137	1.03252	0.936318	0.980493	1.01116	0.997802	1.0144	0.990644	0.963002	1.0595	0.959445	0.94535	1.01511	0.990545	0.99372	1.00904	0.980689	1.0847	0.977165	0.917044	0.928207	1.00361	1.06364	0.959829	0.988566	0.967539	1.04875	0.984521	1.02357	1.01086	1.01157	0.980297	1.01227	1.05359	0.979611	1.04938	1.01776	1.04206	0.918788	1.01258	1.02204	1.0143	0.99223	1.01288	0.99233	1.01521
738	chr2	193540466	194179371	0.955137	1.03252	0.936318	0.980493	1.01116	0.997802	1.0144	0.990644	0.963002	1.0595	0.959445	0.94535	1.01511	0.990545	0.99372	1.00904	0.980689	1.0847	0.977165	0.917044	0.928207	1.00361	1.06364	0.959829	0.988566	0.967539	1.04875	0.984521	1.02357	1.01086	1.01157	0.980297	1.01227	1.05359	0.979611	1.04938	1.01776	1.04206	0.918788	1.01258	1.02204	1.0143	0.99223	1.01288	0.99233	1.01521
739	chr2	194179372	194826947	0.955137	1.03252	0.936318	0.980493	1.01116	0.997802	1.0144	0.990644	0.963002	1.0595	0.959445	0.94535	1.01511	0.990545	0.99372	1.00904	0.980689	1.0847	0.977165	0.917044	0.928207	1.00361	1.06364	0.959829	0.988566	0.967539	1.04875	0.984521	1.02357	1.01086	1.01157	0.980297	1.01227	1.05359	0.979611	1.04938	1.01776	1.04206	0.918788	1.01258	1.02204	1.0143	0.99223	1.01288	0.99233	1.01521
740	chr2	194826948	195483620	0.955137	1.03252	0.936318	0.980493	1.01116	0.997802	1.0144	0.990644	0.963002	1.0595	0.959445	0.94535	1.01511	0.990545	0.99372	1.00904	0.980689	1.0847	0.977165	0.917044	0.928207	1.00361	1.06364	0.959829	0.988566	0.967539	1.04875	0.984521	1.02357	1.01086	1.01157	0.980297	1.01227	1.05359	0.979611	1.04938	1.01776	1.04206	0.918788	1.01258	1.02204	1.0143	0.99223	1.01288	0.99233	1.01521
741	chr2	195483621	196095895	0.955137	1.03252	0.936318	0.980493	1.01116	0.997802	1.0144	0.990644	0.963002	1.0595	0.959445	0.94535	1.01511	0.990545	0.99372	1.00904	0.980689	1.0847	0.977165	0.917044	0.928207	1.00361	1.06364	0.959829	0.988566	0.967539	1.04875	0.984521	1.02357	1.01086	1.01157	0.980297	1.01227	1.05359	0.979611	1.04938	1.01776	1.04206	0.918788	1.01258	1.02204	1.0143	0.99223	1.01288	0.99233	1.01521
742	chr2	196095896	196708732	0.955137	1.03252	0.936318	0.980493	1.01116	0.997802	1.0144	0.990644	0.963002	1.0595	0.959445	0.94535	1.01511	0.990545	0.99372	1.00904	0.980689	1.0847	0.977165	0.917044	0.928207	1.00361	1.06364	0.959829	0.988566	0.967539	1.04875	0.984521	1.02357	1.01086	1.01157	0.980297	1.01227	1.05359	0.979611	1.04938	1.01776	1.04206	0.918788	1.01258	1.02204	1.0143	0.99223	1.01288	0.99233	1.01521
743	chr2	196708733	197286682	0.955137	1.03252	0.936318	0.980493	1.01116	0.997802	1.0144	0.990644	0.963002	1.0595	0.959445	0.94535	1.01511	0.990545	0.99372	1.00904	0.980689	1.0847	0.977165	0.917044	0.928207	1.00361	1.06364	0.959829	0.988566	0.967539	1.04875	0.984521	1.02357	1.01086	1.01157	0.980297	1.01227	1.05359	0.979611	1.04938	1.01776	1.04206	0.918788	1.01258	1.02204	1.0143	0.99223	1.01288	0.99233	1.01521
744	chr2	197286683	197867756	0.955137	1.03252	0.936318	0.980493	1.01116	0.997802	1.0144	0.990644	0.963002	1.0595	0.959445	0.94535	1.01511	0.990545	0.99372	1.00904	0.980689	1.50817	0.977165	0.917044	0.928207	1.00361	1.06364	0.959829	0.988566	0.967539	1.04875	0.984521	1.02357	1.01086	1.01157	0.980297	1.01227	1.05359	0.979611	1.04938	1.01776	1.04206	0.918788	1.01258	1.02204	1.0143	0.99223	1.01288	0.99233	1.01521
745	chr2	197867757	198426965	0.955137	1.03252	0.936318	0.980493	1.01116	0.997802	1.0144	0.990644	0.963002	1.0595	0.959445	0.94535	1.01511	0.990545	0.99372	1.00904	0.980689	1.50817	0.977165	0.917044	0.928207	1.00361	1.06364	0.959829	0.988566	0.967539	1.04875	0.984521	1.02357	1.01086	1.01157	0.980297	1.01227	1.05359	0.979611	1.04938	1.01776	1.04206	0.918788	1.01258	1.02204	1.0143	0.99223	1.01288	0.99233	1.01521
746	chr2	198426966	199037780	0.955137	1.03252	0.936318	0.980493	1.01116	0.997802	1.0144	0.990644	0.963002	1.0595	0.959445	0.94535	1.01511	0.990545	0.99372	1.00904	0.980689	1.50817	0.977165	0.917044	0.928207	1.00361	1.06364	0.959829	0.988566	0.967539	1.04875	0.984521	1.02357	1.01086	1.01157	0.980297	1.01227	1.05359	0.979611	1.04938	1.01776	1.04206	0.918788	1.01258	1.02204	1.0143	0.99223	1.01288	0.99233	1.01521
747	chr2	199037781	199629140	0.955137	1.03252	0.936318	0.980493	1.01116	0.997802	1.0144	0.990644	0.963002	1.0595	0.959445	0.94535	1.01511	0.990545	0.99372	1.00904	0.980689	1.50817	0.977165	0.917044	0.928207	1.00361	1.06364	0.959829	0.988566	0.967539	1.04875	0.984521	1.02357	1.01086	1.01157	0.980297	1.01227	1.05359	0.979611	1.04938	1.01776	1.04206	0.918788	1.01258	1.02204	1.0143	0.99223	1.01288	0.99233	1.01521
748	chr2	199629141	200229865	0.955137	1.03252	0.936318	0.980493	1.01116	0.997802	1.0144	0.990644	0.963002	1.0595	0.959445	0.94535	1.01511	0.990545	0.99372	1.00904	0.980689	1.50817	0.977165	0.917044	0.928207	1.00361	1.06364	0.959829	0.988566	0.967539	1.04875	0.984521	1.02357	1.01086	1.01157	0.980297	1.01227	1.05359	0.979611	1.04938	1.01776	1.04206	0.918788	1.01258	1.02204	1.0143	0.99223	1.01288	0.99233	1.01521
749	chr2	200229866	200797130	0.955137	1.03252	0.936318	0.980493	1.01116	0.997802	1.0144	0.990644	0.963002	1.0595	0.959445	0.94535	1.01511	0.990545	0.99372	1.00904	0.980689	1.50817	0.977165	0.917044	0.928207	1.00361	1.06364	0.959829	0.988566	0.967539	1.04875	0.984521	1.02357	1.01086	1.01157	0.980297	1.01227	1.05359	0.979611	1.04938	1.01776	1.04206	0.918788	1.01258	1.02204	1.0143	0.99223	1.01288	0.99233	1.01521
750	chr2	200797131	201352467	0.955137	1.03252	0.936318	0.980493	1.01116	0.997802	1.0144	0.990644	0.963002	1.0595	0.959445	0.94535	1.01511	0.990545	0.99372	1.00904	0.980689	1.50817	0.977165	0.917044	0.928207	1.00361	1.06364	0.959829	0.988566	0.967539	1.04875	0.984521	1.02357	1.01086	1.01157	0.980297	1.01227	1.05359	0.979611	1.04938	1.01776	1.04206	0.918788	1.01258	1.02204	1.0143	0.99223	1.01288	0.99233	1.01521
751	chr2	201352468	201904224	0.955137	1.03252	0.936318	0.980493	1.01116	0.997802	1.0144	0.990644	0.963002	1.0595	0.959445	0.94535	1.01511	0.990545	0.99372	1.00904	0.980689	1.50817	0.977165	0.917044	0.928207	1.00361	1.06364	0.959829	0.988566	0.967539	1.04875	0.984521	1.02357	1.01086	1.01157	0.980297	1.01227	1.05359	0.979611	1.04938	1.01776	1.04206	0.918788	1.01258	1.02204	1.0143	0.99223	1.01288	0.99233	1.01521
752	chr2	201904225	202492300	0.955137	1.03252	0.936318	0.980493	1.01116	0.997802	1.0144	0.990644	0.963002	1.0595	0.959445	0.94535	1.01511	0.990545	0.99372	1.00904	0.980689	1.50817	0.977165	0.917044	0.928207	1.00361	1.06364	0.959829	0.988566	0.967539	1.04875	0.984521	1.02357	1.01086	1.01157	0.980297	1.01227	1.05359	0.979611	1.04938	1.01776	1.04206	0.918788	1.01258	1.02204	1.0143	0.99223	1.01288	0.99233	1.01521
753	chr2	202492301	203029930	0.955137	1.03252	0.936318	0.980493	1.01116	0.997802	1.0144	0.990644	0.963002	1.0595	0.959445	0.94535	1.01511	0.990545	0.99372	1.00904	0.980689	1.50817	0.977165	0.917044	0.928207	1.00361	1.06364	0.959829	0.988566	0.967539	1.04875	0.984521	1.02357	1.01086	1.01157	0.980297	1.01227	1.05359	0.979611	1.04938	1.01776	1.04206	0.918788	1.01258	1.02204	1.0143	0.99223	1.01288	0.99233	1.01521
754	chr2	203029931	203629667	0.955137	1.03252	0.936318	0.980493	1.01116	0.997802	1.0144	0.990644	0.963002	1.0595	0.959445	0.94535	1.01511	0.990545	0.99372	1.00904	0.980689	1.50817	0.977165	0.917044	0.928207	1.00361	1.06364	0.959829	0.988566	0.967539	1.04875	0.984521	1.02357	1.01086	1.01157	0.980297	1.01227	1.05359	0.979611	1.04938	1.01776	1.04206	0.918788	1.01258	1.02204	1.0143	0.99223	1.01288	0.99233	1.01521
755	chr2	203629668	204254706	0.955137	1.03252	0.936318	0.980493	1.01116	0.997802	1.0144	0.990644	0.963002	1.0595	0.959445	0.94535	1.01511	0.990545	0.99372	1.00904	0.980689	1.50817	0.977165	0.917044	0.928207	1.00361	1.06364	0.959829	0.988566	0.967539	1.04875	0.984521	1.02357	1.01086	1.01157	0.980297	1.01227	1.05359	0.979611	1.04938	1.01776	1.04206	0.918788	1.01258	1.02204	1.0143	0.99223	1.01288	0.99233	1.01521
756	chr2	204254707	204816649	0.955137	1.03252	0.936318	0.980493	1.01116	0.997802	1.0144	0.990644	0.963002	1.0595	0.959445	0.94535	1.01511	0.990545	0.99372	1.00904	0.980689	1.50817	0.977165	0.917044	0.928207	1.00361	1.06364	0.959829	0.988566	0.967539	1.04875	0.984521	1.02357	1.01086	1.01157	0.980297	1.01227	1.05359	0.979611	1.04938	1.01776	1.04206	0.918788	1.01258	1.02204	1.0143	0.99223	1.01288	0.99233	1.01521
757	chr2	204816650	205323412	0.955137	1.03252	0.936318	0.980493	1.01116	0.997802	1.0144	0.990644	0.963002	1.0595	0.959445	0.94535	1.01511	0.990545	0.99372	1.00904	0.980689	1.50817	0.977165	0.917044	0.928207	1.00361	1.06364	0.959829	0.988566	0.967539	1.04875	0.984521	1.02357	1.01086	1.01157	0.980297	1.01227	1.05359	0.979611	1.04938	1.01776	1.04206	0.918788	1.01258	1.02204	1.0143	0.99223	1.01288	0.99233	1.01521
758	chr2	205323413	205905460	0.955137	1.03252	0.936318	0.980493	1.01116	0.997802	1.0144	0.990644	0.963002	1.0595	0.959445	0.94535	1.01511	0.990545	0.99372	1.00904	0.980689	1.50817	0.977165	0.917044	0.928207	1.00361	1.06364	0.959829	0.988566	0.967539	1.04875	0.984521	1.02357	1.01086	1.01157	0.980297	1.01227	1.05359	0.979611	1.04938	1.01776	1.04206	0.918788	1.01258	1.02204	1.0143	0.99223	1.01288	0.99233	1.01521
759	chr2	205905461	206466045	0.955137	1.03252	0.936318	0.980493	1.01116	0.997802	1.0144	0.990644	0.963002	1.0595	0.959445	0.94535	1.01511	0.990545	0.99372	1.00904	0.980689	1.50817	0.977165	0.917044	0.928207	1.00361	1.06364	0.959829	0.988566	0.967539	1.04875	0.984521	1.02357	1.01086	1.01157	0.980297	1.01227	1.05359	0.979611	1.04938	1.01776	1.04206	0.918788	1.01258	1.02204	1.0143	0.99223	1.01288	0.99233	1.01521
760	chr2	206466046	207006434	0.955137	1.03252	0.936318	0.980493	1.01116	0.997802	1.0144	0.990644	0.963002	1.0595	0.959445	0.94535	1.01511	0.990545	0.99372	1.00904	0.980689	1.50817	0.977165	0.917044	0.928207	1.00361	1.06364	0.959829	0.988566	0.967539	1.04875	0.984521	1.02357	1.01086	1.01157	0.980297	1.01227	1.05359	0.979611	1.04938	1.01776	1.04206	0.918788	1.01258	1.02204	1.0143	0.99223	1.01288	0.99233	1.01521
761	chr2	207006435	207606015	0.955137	1.03252	0.936318	0.980493	1.01116	0.997802	1.0144	0.990644	0.963002	1.0595	0.959445	0.94535	1.01511	0.990545	0.99372	1.00904	0.980689	1.50817	0.977165	0.917044	0.928207	1.00361	1.06364	0.959829	0.988566	0.967539	1.04875	0.984521	1.02357	1.01086	1.01157	0.980297	1.01227	1.05359	0.979611	1.04938	1.01776	1.04206	0.918788	1.01258	1.02204	1.0143	0.99223	1.01288	0.99233	1.01521
762	chr2	207606016	208158531	0.955137	1.03252	0.936318	0.980493	1.01116	0.997802	1.0144	0.990644	0.963002	1.0595	0.959445	0.94535	1.01511	0.990545	0.99372	1.00904	0.980689	1.50817	0.977165	0.917044	0.928207	1.00361	1.06364	0.959829	0.988566	0.967539	1.04875	0.984521	1.02357	1.01086	1.01157	0.980297	1.01227	1.05359	0.979611	1.04938	1.01776	1.04206	0.918788	1.01258	1.02204	1.0143	0.99223	1.01288	0.99233	1.01521
763	chr2	208158532	208744211	0.955137	1.03252	0.936318	0.980493	1.01116	0.997802	1.0144	0.990644	0.963002	1.0595	0.959445	0.94535	1.01511	0.990545	0.99372	1.00904	0.980689	1.50817	0.977165	0.917044	0.928207	1.00361	1.06364	0.959829	0.988566	0.967539	1.04875	0.984521	1.02357	1.01086	1.01157	0.980297	1.01227	1.05359	0.979611	1.04938	1.01776	1.04206	0.918788	1.01258	1.02204	1.0143	0.99223	1.01288	0.99233	1.01521
764	chr2	208744212	209307346	0.955137	1.03252	0.936318	0.980493	1.01116	0.997802	1.0144	0.990644	0.963002	1.0595	0.959445	0.94535	1.01511	0.990545	0.99372	1.00904	0.980689	1.50817	0.977165	0.917044	0.928207	1.00361	1.06364	0.959829	0.988566	0.967539	1.04875	0.984521	1.02357	1.01086	1.01157	0.980297	1.01227	1.05359	0.979611	1.04938	1.01776	1.04206	0.918788	1.01258	1.02204	1.0143	0.99223	1.01288	0.99233	1.01521
765	chr2	209307347	209950366	0.955137	1.03252	0.936318	0.980493	1.01116	0.997802	1.0144	0.990644	0.963002	1.0595	0.959445	0.94535	1.01511	0.990545	0.99372	1.00904	0.980689	1.50817	0.977165	0.917044	0.928207	1.00361	1.06364	0.959829	0.988566	0.967539	1.04875	0.984521	1.02357	1.01086	1.01157	0.980297	1.01227	1.05359	0.979611	1.04938	1.01776	1.04206	0.918788	1.01258	1.02204	1.0143	0.99223	1.01288	0.99233	1.01521
766	chr2	209950367	210574043	0.955137	1.03252	0.936318	0.980493	1.01116	0.997802	1.0144	0.990644	0.963002	1.0595	0.959445	0.94535	1.01511	0.990545	0.99372	1.00904	0.980689	1.50817	0.977165	0.917044	0.928207	1.00361	1.06364	0.959829	0.988566	0.967539	1.04875	0.984521	1.02357	1.01086	1.01157	0.980297	1.01227	1.05359	0.979611	1.04938	1.01776	1.04206	0.918788	1.01258	1.02204	1.0143	0.99223	1.01288	0.99233	1.01521
767	chr2	210574044	211171618	0.955137	1.03252	0.936318	0.980493	1.01116	0.997802	1.0144	0.990644	0.963002	1.0595	0.959445	0.94535	1.01511	0.990545	0.99372	1.00904	0.980689	1.50817	0.977165	0.917044	0.928207	1.00361	1.06364	0.959829	0.988566	0.967539	1.04875	0.984521	1.02357	1.01086	1.01157	0.980297	1.01227	1.05359	0.979611	1.04938	1.01776	1.04206	0.918788	1.01258	1.02204	1.0143	0.99223	1.01288	0.99233	1.01521
768	chr2	211171619	211768561	0.955137	1.03252	0.936318	0.980493	1.01116	0.997802	1.0144	0.990644	0.963002	1.0595	0.959445	0.94535	1.01511	0.990545	0.99372	1.00904	0.980689	1.50817	0.977165	0.917044	0.928207	1.00361	1.06364	0.959829	0.988566	0.967539	1.04875	0.984521	1.02357	1.01086	1.01157	0.980297	1.01227	1.05359	0.979611	1.04938	1.01776	1.04206	0.918788	1.01258	1.02204	1.0143	0.99223	1.01288	0.99233	1.01521
769	chr2	211768562	212385880	0.955137	1.03252	0.936318	0.980493	1.01116	0.997802	1.0144	0.990644	0.963002	1.0595	0.959445	0.94535	1.01511	0.990545	0.99372	1.00904	0.980689	1.50817	0.977165	0.917044	0.928207	1.00361	1.06364	0.959829	0.988566	0.967539	1.04875	0.984521	1.02357	1.01086	1.01157	0.980297	1.01227	1.05359	0.979611	1.04938	1.01776	1.04206	0.918788	1.01258	1.02204	1.0143	0.99223	1.01288	0.99233	1.01521
770	chr2	212385881	213023884	0.955137	1.03252	0.936318	0.980493	1.01116	0.997802	1.0144	0.990644	0.963002	1.0595	0.959445	0.94535	1.01511	0.990545	0.99372	1.00904	0.980689	1.50817	0.977165	0.917044	0.928207	1.00361	1.06364	0.959829	0.988566	0.967539	1.04875	0.984521	1.02357	1.01086	1.01157	0.980297	1.01227	1.05359	0.979611	1.04938	1.01776	1.04206	0.918788	1.01258	1.02204	1.0143	0.99223	1.01288	0.99233	1.01521
771	chr2	213023885	213649304	0.955137	1.03252	0.936318	0.980493	1.01116	0.997802	1.0144	0.990644	0.963002	1.0595	0.959445	0.94535	1.01511	0.990545	0.99372	1.00904	0.980689	1.50817	0.977165	0.917044	0.928207	1.00361	1.06364	0.959829	0.988566	0.967539	1.04875	0.984521	1.02357	1.01086	1.01157	0.980297	1.01227	1.05359	0.979611	1.04938	1.01776	1.04206	0.918788	1.01258	1.02204	1.0143	0.99223	1.01288	0.99233	1.01521
772	chr2	213649305	214234366	0.955137	1.03252	0.936318	0.980493	1.01116	0.997802	1.0144	0.990644	0.963002	1.0595	0.959445	0.94535	1.01511	0.990545	0.99372	1.00904	0.980689	1.50817	0.977165	0.917044	0.928207	1.00361	1.06364	0.959829	0.988566	0.967539	1.04875	0.984521	1.02357	1.01086	1.01157	0.980297	1.01227	1.05359	0.979611	1.04938	1.01776	1.04206	0.918788	1.01258	1.02204	1.0143	0.99223	1.01288	0.99233	1.01521
773	chr2	214234367	214852894	0.955137	1.03252	0.936318	0.980493	1.01116	0.997802	1.0144	0.990644	0.963002	1.0595	0.959445	0.94535	1.01511	0.990545	0.99372	1.00904	0.980689	1.09615	0.977165	0.917044	0.928207	1.00361	1.06364	0.959829	0.988566	0.967539	1.04875	0.984521	1.02357	1.01086	1.01157	0.980297	1.01227	1.05359	0.979611	1.04938	1.01776	1.04206	0.918788	1.01258	1.02204	1.0143	0.99223	1.01288	0.99233	1.01521
774	chr2	214852895	215430070	0.955137	1.03252	0.936318	0.980493	1.01116	0.997802	1.0144	0.990644	0.963002	1.0595	0.959445	0.94535	1.01511	0.990545	0.99372	1.00904	0.980689	1.09615	0.977165	0.917044	0.928207	1.00361	1.06364	0.959829	0.988566	0.967539	1.04875	0.984521	1.02357	1.01086	1.01157	0.980297	1.01227	1.05359	0.979611	1.04938	1.01776	1.04206	0.918788	1.01258	1.02204	1.0143	0.99223	1.01288	0.99233	1.01521
775	chr2	215430071	216033288	0.955137	1.03252	0.936318	0.980493	1.01116	0.997802	1.0144	0.990644	0.963002	1.0595	0.959445	0.94535	1.01511	0.990545	0.99372	1.00904	0.980689	1.09615	0.977165	0.917044	0.928207	1.00361	1.06364	0.959829	0.988566	0.967539	1.04875	0.984521	1.02357	1.01086	1.01157	0.980297	1.01227	1.05359	0.979611	1.04938	1.01776	1.04206	0.918788	1.01258	1.02204	1.0143	0.99223	1.01288	0.99233	1.01521
776	chr2	216033289	216581914	0.955137	1.03252	0.936318	0.980493	1.01116	0.997802	1.0144	0.990644	0.963002	1.0595	0.959445	0.94535	1.01511	0.990545	0.99372	1.00904	0.980689	1.09615	0.977165	0.917044	0.928207	1.00361	1.06364	0.959829	0.988566	0.967539	1.04875	0.984521	1.02357	1.01086	1.01157	0.980297	1.01227	1.05359	0.979611	1.04938	1.01776	1.04206	0.918788	1.01258	1.02204	1.0143	0.99223	1.01288	0.99233	1.01521
777	chr2	216581915	217115576	0.955137	1.03252	0.936318	0.980493	1.01116	0.997802	1.0144	0.990644	0.963002	1.0595	0.959445	0.94535	1.01511	0.990545	0.99372	1.00904	0.980689	1.09615	0.977165	0.917044	0.928207	1.00361	1.06364	0.959829	0.988566	0.967539	1.04875	0.984521	1.02357	1.01086	1.01157	0.980297	1.01227	1.05359	0.979611	1.04938	1.01776	1.04206	0.918788	1.01258	1.02204	1.0143	0.99223	1.01288	0.99233	1.01521
778	chr2	217115577	217635057	0.955137	1.03252	0.936318	0.980493	1.01116	0.997802	1.0144	0.990644	0.963002	1.0595	0.959445	0.94535	1.01511	0.990545	0.99372	1.00904	0.980689	1.09615	0.977165	0.917044	0.928207	1.00361	1.06364	0.959829	0.988566	0.967539	1.04875	0.984521	1.02357	1.01086	1.01157	0.980297	1.01227	1.05359	0.979611	1.04938	1.01776	1.04206	0.918788	1.01258	1.02204	1.0143	0.99223	1.01288	0.99233	1.01521
779	chr2	217635058	218179413	0.955137	1.03252	0.936318	0.980493	1.01116	0.997802	1.0144	0.990644	0.963002	1.0595	0.959445	0.94535	1.01511	0.990545	0.99372	1.00904	0.980689	1.09615	0.977165	0.917044	0.928207	1.00361	1.06364	0.959829	0.988566	0.967539	1.04875	0.984521	1.02357	1.01086	1.01157	0.980297	1.01227	1.05359	0.979611	1.04938	1.01776	1.04206	0.918788	1.01258	1.02204	1.0143	0.99223	1.01288	0.99233	1.01521
780	chr2	218179414	218692445	0.955137	1.03252	0.936318	0.980493	1.01116	0.997802	1.0144	0.990644	0.963002	1.0595	0.959445	0.94535	1.01511	0.990545	0.99372	1.00904	0.980689	1.09615	0.977165	0.917044	0.928207	1.00361	1.06364	0.959829	0.988566	0.967539	1.04875	0.984521	1.02357	1.01086	1.01157	0.980297	1.01227	1.05359	0.979611	1.04938	1.01776	1.04206	0.918788	1.01258	1.02204	1.0143	0.99223	1.01288	0.99233	1.01521
781	chr2	218692446	219232032	0.955137	1.03252	0.936318	0.980493	1.01116	0.997802	1.0144	0.990644	0.963002	1.0595	0.959445	0.94535	1.01511	0.990545	0.99372	1.00904	0.980689	1.09615	0.977165	0.917044	0.928207	1.00361	1.06364	0.959829	0.988566	0.967539	1.04875	0.984521	1.02357	1.01086	1.01157	0.980297	1.01227	1.05359	0.979611	1.04938	1.01776	1.04206	0.918788	1.01258	1.02204	1.0143	0.99223	1.01288	0.99233	1.01521
782	chr2	219232033	219808940	0.955137	1.03252	0.936318	0.980493	1.01116	0.997802	1.0144	0.990644	0.963002	1.0595	0.959445	0.94535	1.01511	0.990545	0.99372	1.00904	0.980689	1.09615	0.977165	0.917044	0.928207	1.00361	1.06364	0.959829	0.988566	0.967539	1.04875	0.984521	1.02357	1.01086	1.01157	0.980297	1.01227	1.05359	0.979611	1.04938	1.01776	1.04206	0.918788	1.01258	1.02204	1.0143	0.99223	1.01288	0.99233	1.01521
783	chr2	219808941	220374296	0.955137	1.03252	0.936318	0.980493	1.01116	0.997802	1.0144	0.990644	0.963002	1.0595	0.959445	0.94535	1.01511	0.990545	0.99372	1.00904	0.980689	1.09615	0.977165	0.917044	0.928207	1.00361	1.06364	0.959829	0.988566	0.967539	1.04875	0.984521	1.02357	1.01086	1.01157	0.980297	1.01227	1.05359	0.979611	1.04938	1.01776	1.04206	0.918788	1.01258	1.02204	1.0143	0.99223	1.01288	0.99233	1.01521
784	chr2	220374297	220896785	0.955137	1.03252	0.936318	0.980493	1.01116	0.997802	1.0144	0.990644	0.963002	1.0595	0.959445	0.94535	1.01511	0.990545	0.99372	1.00904	0.980689	1.09615	0.977165	0.917044	0.928207	1.00361	1.06364	0.959829	0.988566	0.967539	1.04875	0.984521	1.02357	1.01086	1.01157	0.980297	1.01227	1.05359	0.979611	1.04938	1.01776	1.04206	0.918788	1.01258	1.02204	1.0143	0.99223	1.01288	0.99233	1.01521
785	chr2	220896786	221456349	0.955137	1.03252	0.936318	0.980493	1.01116	0.997802	1.0144	0.990644	0.963002	1.0595	0.959445	0.94535	1.01511	0.990545	0.99372	1.00904	0.980689	1.09615	0.977165	0.917044	0.928207	1.00361	1.06364	0.959829	0.988566	0.967539	1.04875	0.984521	1.02357	1.01086	1.01157	0.980297	1.01227	1.05359	0.979611	1.04938	1.01776	1.04206	0.918788	1.01258	1.02204	1.0143	0.99223	1.01288	0.99233	1.01521
786	chr2	221456350	222053679	0.955137	1.03252	0.936318	0.980493	1.01116	0.997802	1.0144	0.990644	0.963002	1.0595	0.959445	0.94535	1.01511	0.990545	0.99372	1.00904	0.980689	1.09615	0.977165	0.917044	0.928207	1.00361	1.06364	0.959829	0.988566	0.967539	1.04875	0.984521	1.02357	1.01086	1.01157	0.980297	1.01227	1.05359	0.979611	1.04938	1.01776	1.04206	0.918788	1.01258	1.02204	1.0143	0.99223	1.01288	0.99233	1.01521
787	chr2	222053680	222632543	0.955137	1.03252	0.936318	0.980493	1.01116	0.997802	1.0144	0.990644	0.963002	1.0595	0.959445	0.94535	1.01511	0.990545	0.99372	1.00904	0.980689	1.09615	0.977165	0.917044	0.928207	1.00361	1.06364	0.959829	0.988566	0.967539	1.04875	0.984521	1.02357	1.01086	1.01157	0.980297	1.01227	1.05359	0.979611	1.04938	1.01776	1.04206	0.918788	1.01258	1.02204	1.0143	0.99223	1.01288	0.99233	1.01521
788	chr2	222632544	223225608	0.955137	1.03252	0.936318	0.980493	1.01116	0.997802	1.0144	0.990644	0.963002	1.0595	0.959445	0.94535	1.01511	0.990545	0.99372	1.00904	0.980689	1.09615	0.977165	0.917044	0.928207	1.00361	1.06364	0.959829	0.988566	0.967539	1.04875	0.984521	1.02357	1.01086	1.01157	0.980297	1.01227	1.05359	0.979611	1.04938	1.01776	1.04206	0.918788	1.01258	1.02204	1.0143	0.99223	1.01288	0.99233	1.01521
789	chr2	223225609	223806104	0.955137	1.03252	0.936318	0.980493	1.01116	0.997802	1.0144	0.990644	0.963002	1.0595	0.959445	0.94535	1.01511	0.990545	0.99372	1.00904	0.980689	1.09615	0.977165	0.917044	0.928207	1.00361	1.06364	0.959829	0.988566	0.967539	1.04875	0.984521	1.02357	1.01086	1.01157	0.980297	1.01227	1.05359	0.979611	1.04938	1.01776	1.04206	0.918788	1.01258	1.02204	1.0143	0.99223	1.01288	0.99233	1.01521
790	chr2	223806105	224407124	0.955137	1.03252	0.936318	0.980493	1.01116	0.997802	1.0144	0.990644	0.963002	1.0595	0.959445	0.94535	1.01511	0.990545	0.99372	1.00904	0.980689	1.09615	0.977165	0.917044	0.928207	1.00361	1.06364	0.959829	0.988566	0.967539	1.04875	0.984521	1.02357	1.01086	1.01157	0.980297	1.01227	1.05359	0.979611	1.04938	1.01776	1.04206	0.918788	1.01258	1.02204	1.0143	0.99223	1.01288	0.99233	1.01521
791	chr2	224407125	224980386	0.955137	1.03252	0.936318	0.980493	1.01116	0.997802	1.0144	0.990644	0.963002	1.0595	0.959445	0.94535	1.01511	0.990545	0.99372	1.00904	0.980689	1.09615	0.977165	0.917044	0.928207	1.00361	1.06364	0.959829	0.988566	0.967539	1.04875	0.984521	1.02357	1.01086	1.01157	0.980297	1.01227	1.05359	0.979611	1.04938	1.01776	1.04206	0.918788	1.01258	1.02204	1.0143	0.99223	1.01288	0.99233	1.01521
792	chr2	224980387	225550324	0.955137	1.03252	0.936318	0.980493	1.01116	0.997802	1.0144	0.990644	0.963002	1.0595	0.959445	0.94535	1.01511	0.990545	0.99372	1.00904	0.980689	1.09615	0.977165	0.917044	0.928207	1.00361	1.06364	0.959829	0.988566	0.967539	1.04875	0.984521	1.02357	1.01086	1.01157	0.980297	1.01227	1.05359	0.979611	1.04938	1.01776	1.04206	0.918788	1.01258	1.02204	1.0143	0.99223	1.01288	0.99233	1.01521
793	chr2	225550325	226149564	0.955137	1.03252	0.936318	0.980493	1.01116	0.997802	1.0144	0.990644	0.963002	1.0595	0.959445	0.94535	1.01511	0.990545	0.99372	1.00904	0.980689	1.09615	0.977165	0.917044	0.928207	1.00361	1.06364	0.959829	0.988566	0.967539	1.04875	0.984521	1.02357	1.01086	1.01157	0.980297	1.01227	1.05359	0.979611	1.04938	1.01776	1.04206	0.918788	1.01258	1.02204	1.0143	0.99223	1.01288	0.99233	1.01521
794	chr2	226149565	226735473	0.955137	1.03252	0.936318	0.980493	1.01116	0.997802	1.0144	0.752767	0.963002	1.0595	0.959445	0.94535	1.01511	0.990545	0.99372	1.00904	0.980689	1.09615	0.977165	0.917044	0.928207	1.00361	1.06364	0.959829	0.988566	0.967539	1.04875	0.984521	1.02357	1.01086	1.01157	0.980297	1.01227	1.05359	0.979611	1.04938	1.01776	1.04206	0.918788	1.01258	1.02204	1.0143	0.99223	1.01288	0.99233	1.01521
795	chr2	226735474	227324478	0.955137	1.03252	0.936318	0.980493	1.01116	0.997802	1.0144	0.752767	0.963002	1.0595	0.959445	0.94535	1.01511	0.990545	0.99372	1.00904	0.980689	1.09615	0.977165	0.917044	0.928207	1.00361	1.06364	0.959829	0.988566	0.967539	1.04875	0.984521	1.02357	1.01086	1.01157	0.980297	1.01227	1.05359	0.979611	1.04938	1.01776	1.04206	0.918788	1.01258	1.02204	1.0143	0.99223	1.01288	0.99233	1.01521
796	chr2	227324479	227877678	0.955137	1.03252	0.936318	0.980493	1.01116	0.997802	1.0144	0.752767	0.963002	1.0595	0.959445	0.94535	1.01511	0.990545	0.99372	1.00904	0.980689	1.09615	0.977165	0.917044	0.928207	1.00361	1.06364	0.959829	0.988566	0.967539	1.04875	0.984521	1.02357	1.01086	1.01157	0.980297	1.01227	1.05359	0.979611	1.04938	1.01776	1.04206	0.918788	1.01258	1.02204	1.0143	0.99223	1.01288	0.99233	1.01521
797	chr2	227877679	228440656	0.955137	1.03252	0.936318	0.980493	1.01116	0.997802	1.0144	0.752767	0.963002	1.0595	0.959445	0.94535	1.01511	0.990545	0.99372	1.00904	0.980689	1.09615	0.977165	0.917044	0.928207	1.00361	1.06364	0.959829	0.988566	0.967539	1.04875	0.984521	1.02357	1.01086	1.01157	0.980297	1.01227	1.05359	0.979611	1.04938	1.01776	1.04206	0.918788	1.01258	1.02204	1.0143	0.99223	1.01288	0.99233	1.01521
798	chr2	228440657	229049246	0.955137	1.03252	0.936318	0.980493	1.01116	0.997802	1.0144	0.752767	0.963002	1.0595	0.959445	0.94535	1.01511	0.990545	0.99372	1.00904	0.980689	1.09615	0.977165	0.917044	0.928207	1.00361	1.06364	0.959829	0.988566	0.967539	1.04875	0.984521	1.02357	1.01086	1.01157	0.980297	1.01227	1.05359	0.979611	1.04938	1.01776	1.04206	0.918788	1.01258	1.02204	1.0143	0.99223	1.01288	0.99233	1.01521
799	chr2	229049247	229662697	0.955137	1.03252	0.936318	0.980493	1.01116	0.997802	1.0144	0.958199	0.963002	1.0595	0.959445	0.94535	1.01511	0.990545	0.99372	1.00904	0.980689	1.09615	0.977165	0.917044	0.928207	1.00361	1.06364	0.959829	0.988566	0.967539	1.04875	0.984521	1.02357	1.01086	1.01157	0.980297	1.01227	1.05359	0.979611	1.04938	1.01776	1.04206	0.918788	1.01258	1.02204	1.0143	0.99223	1.01288	0.99233	1.01521
800	chr2	229662698	230228189	0.955137	1.03252	0.936318	0.980493	1.01116	0.997802	1.0144	0.958199	0.963002	1.0595	0.959445	0.94535	1.01511	0.990545	0.99372	1.00904	0.980689	1.09615	0.977165	0.917044	0.928207	1.00361	1.06364	0.959829	0.988566	0.967539	1.04875	0.984521	1.02357	1.01086	1.01157	0.980297	1.01227	1.05359	0.979611	1.04938	1.01776	1.04206	0.918788	1.01258	1.02204	1.0143	0.99223	1.01288	0.99233	1.01521
801	chr2	230228190	230800531	0.955137	1.03252	0.936318	0.980493	1.01116	0.997802	1.0144	0.958199	0.963002	1.0595	0.959445	0.94535	1.01511	0.990545	0.99372	1.00904	0.980689	1.09615	0.977165	0.917044	0.928207	1.00361	0.916036	0.959829	0.988566	0.967539	1.04875	0.984521	1.02357	1.01086	1.01157	0.980297	1.01227	1.05359	0.979611	1.04938	1.01776	1.04206	0.918788	1.01258	1.02204	1.0143	0.99223	1.01288	0.99233	1.01521
802	chr2	230800532	231405846	0.955137	1.03252	0.936318	0.980493	1.01116	0.997802	1.0144	0.958199	0.963002	1.0595	0.959445	0.94535	1.01511	0.990545	0.99372	1.00904	0.980689	1.09615	0.977165	0.917044	0.928207	1.00361	0.916036	0.959829	0.988566	0.967539	1.04875	0.984521	1.02357	1.01086	1.01157	0.980297	1.01227	1.05359	0.979611	1.04938	1.01776	1.04206	0.918788	1.01258	1.02204	1.0143	0.99223	1.01288	0.99233	1.01521
803	chr2	231405847	231962181	0.955137	1.03252	0.936318	0.980493	1.01116	0.997802	1.0144	0.958199	0.963002	1.0595	0.959445	0.94535	1.01511	0.990545	0.99372	1.00904	0.980689	1.09615	0.977165	0.917044	0.928207	1.00361	0.916036	0.959829	0.988566	0.967539	1.04875	0.984521	1.02357	1.01086	1.01157	0.980297	1.01227	1.05359	0.979611	1.04938	1.01776	1.04206	0.918788	1.01258	1.02204	1.0143	0.99223	1.01288	0.99233	1.01521
804	chr2	231962182	232509364	0.955137	1.03252	0.936318	0.980493	1.01116	0.997802	1.0144	0.958199	0.963002	1.0595	0.959445	0.94535	1.01511	0.990545	0.99372	1.00904	0.980689	1.09615	0.977165	0.917044	0.928207	1.00361	0.916036	0.959829	0.988566	0.967539	1.04875	0.984521	1.02357	1.01086	1.01157	0.980297	1.01227	1.05359	0.979611	1.04938	1.01776	1.04206	0.918788	1.01258	1.02204	1.0143	0.99223	1.01288	0.99233	1.01521
805	chr2	232509365	233105626	0.955137	1.03252	0.936318	0.980493	1.01116	0.997802	1.0144	0.958199	0.963002	1.0595	0.959445	0.94535	1.01511	0.990545	0.99372	1.00904	0.980689	1.09615	0.977165	0.917044	0.928207	1.00361	0.916036	0.959829	0.988566	0.967539	1.04875	0.984521	1.02357	1.01086	1.01157	0.980297	1.01227	1.05359	0.979611	1.04938	1.01776	1.04206	0.918788	1.01258	1.02204	1.0143	0.99223	1.01288	0.99233	1.01521
806	chr2	233105627	233691097	0.955137	1.03252	0.936318	0.980493	1.01116	0.997802	1.0144	0.958199	0.963002	1.0595	0.959445	0.94535	1.01511	0.990545	0.99372	1.00904	0.980689	1.09615	0.977165	0.917044	0.928207	1.00361	0.916036	0.959829	0.988566	0.967539	1.04875	0.984521	1.02357	1.01086	1.01157	0.980297	1.01227	1.05359	0.979611	1.04938	1.01776	1.04206	0.918788	1.01258	1.02204	1.0143	0.99223	1.01288	0.99233	1.01521
807	chr2	233691098	234322803	0.955137	1.03252	0.936318	0.980493	1.01116	0.997802	1.0144	0.958199	0.963002	1.0595	0.959445	0.94535	1.01511	0.990545	0.99372	1.00904	0.980689	1.09615	0.977165	0.917044	0.928207	1.00361	0.916036	0.959829	0.988566	0.967539	1.04875	0.984521	1.02357	1.01086	1.01157	0.980297	1.01227	1.05359	0.979611	1.04938	1.01776	1.04206	0.918788	1.01258	1.02204	1.0143	0.99223	1.01288	0.99233	1.01521
808	chr2	234322804	234876730	0.955137	1.03252	0.936318	0.980493	1.01116	0.997802	1.0144	0.958199	0.963002	1.0595	0.959445	0.94535	1.01511	0.990545	0.99372	1.00904	0.980689	1.09615	0.977165	0.917044	0.928207	1.00361	0.916036	0.959829	0.988566	0.967539	1.04875	0.984521	1.02357	1.01086	1.01157	0.980297	1.01227	1.05359	0.979611	1.04938	1.01776	1.04206	0.918788	1.01258	1.02204	1.0143	0.99223	1.01288	0.99233	1.01521
809	chr2	234876731	235442059	0.955137	1.03252	0.936318	0.980493	1.01116	0.997802	1.0144	0.958199	0.963002	1.0595	0.959445	0.94535	1.01511	0.990545	0.99372	1.00904	0.980689	1.09615	0.977165	0.917044	0.928207	1.00361	0.916036	0.959829	0.988566	0.967539	1.04875	0.984521	1.02357	1.01086	1.01157	0.980297	1.01227	1.05359	0.979611	1.04938	1.01776	1.04206	0.918788	1.01258	1.02204	1.0143	0.99223	1.01288	0.99233	1.01521
810	chr2	235442060	235995331	0.955137	1.03252	0.936318	0.980493	1.01116	0.997802	1.0144	0.958199	0.963002	1.0595	0.959445	0.94535	1.01511	0.990545	0.99372	1.00904	0.980689	1.09615	0.977165	0.917044	0.928207	1.00361	0.916036	0.959829	0.988566	0.967539	1.04875	0.984521	1.02357	1.01086	1.01157	0.980297	1.01227	1.05359	0.979611	1.04938	1.01776	1.04206	0.918788	1.01258	1.02204	1.0143	0.99223	1.01288	0.99233	1.01521
811	chr2	235995332	236527031	0.955137	1.03252	0.936318	0.980493	1.01116	0.997802	1.0144	0.958199	0.963002	1.0595	0.959445	0.94535	1.01511	0.990545	0.99372	1.00904	0.980689	1.09615	0.977165	0.917044	0.928207	1.00361	0.916036	0.959829	0.988566	0.967539	1.04875	0.984521	1.02357	1.01086	1.01157	0.980297	1.01227	1.05359	0.979611	1.04938	1.01776	1.04206	0.918788	1.01258	1.02204	1.0143	0.99223	1.01288	0.99233	1.01521
812	chr2	236527032	237054632	0.955137	1.03252	0.936318	0.980493	1.01116	0.997802	1.0144	0.958199	0.963002	1.0595	0.959445	0.94535	1.01511	0.990545	0.99372	1.00904	0.980689	1.09615	0.977165	0.917044	0.928207	1.00361	0.916036	0.959829	0.988566	0.967539	1.04875	0.984521	1.02357	1.01086	1.01157	0.980297	1.01227	1.05359	0.979611	1.04938	1.01776	1.04206	0.918788	1.01258	1.02204	1.0143	0.99223	1.01288	0.99233	1.01521
813	chr2	237054633	237606095	0.955137	1.03252	0.936318	0.980493	1.01116	0.997802	1.0144	0.958199	0.963002	1.0595	0.959445	0.94535	1.01511	0.990545	0.99372	1.00904	0.980689	1.09615	0.977165	0.917044	0.928207	1.00361	0.916036	0.959829	0.988566	0.967539	1.04875	0.984521	1.02357	1.01086	1.01157	0.980297	1.01227	1.05359	0.979611	1.04938	1.01776	1.04206	0.918788	1.01258	1.02204	1.0143	0.99223	1.01288	0.99233	1.01521
814	chr2	237606096	238134641	0.955137	1.03252	0.936318	0.980493	1.01116	0.997802	1.0144	0.958199	0.963002	1.0595	0.959445	0.94535	1.01511	0.990545	0.99372	1.00904	0.980689	1.33216	0.977165	0.917044	0.928207	1.00361	0.916036	0.959829	0.988566	0.967539	1.04875	0.984521	1.02357	1.01086	1.01157	0.980297	1.01227	1.05359	0.979611	1.04938	1.01776	1.04206	0.918788	1.01258	1.02204	1.0143	0.99223	1.01288	0.99233	1.01521
815	chr2	238134642	238642009	0.955137	1.03252	0.936318	0.980493	1.01116	0.997802	1.0144	0.958199	0.963002	1.0595	0.959445	0.94535	1.01511	0.990545	0.99372	1.00904	0.980689	1.33216	0.977165	0.917044	0.928207	1.00361	0.916036	0.959829	0.988566	0.967539	1.04875	0.984521	1.02357	1.01086	1.01157	0.980297	1.01227	1.05359	0.979611	1.04938	1.01776	1.04206	0.918788	1.01258	1.02204	1.0143	0.99223	1.01288	0.99233	1.01521
816	chr2	238642010	239218709	0.955137	1.03252	0.936318	0.980493	1.01116	0.997802	1.0144	0.958199	0.963002	1.0595	0.959445	0.94535	1.01511	0.990545	0.99372	1.00904	0.980689	1.33216	0.977165	0.917044	0.928207	1.00361	0.916036	0.959829	0.988566	0.967539	1.04875	0.984521	1.02357	1.01086	1.01157	0.980297	1.01227	1.05359	0.979611	1.04938	1.01776	1.04206	0.918788	1.01258	1.02204	1.0143	0.99223	1.01288	0.99233	1.01521
817	chr2	239218710	239771790	0.955137	1.03252	0.936318	0.980493	1.01116	0.997802	1.0144	0.958199	0.963002	1.0595	0.959445	0.94535	1.01511	0.990545	0.99372	1.00904	0.980689	1.33216	0.977165	0.917044	0.928207	1.00361	0.916036	0.959829	0.988566	0.967539	1.04875	0.984521	1.02357	1.01086	1.01157	0.980297	1.01227	1.05359	0.979611	1.04938	1.01776	1.04206	0.918788	1.01258	1.02204	1.0143	0.99223	1.01288	0.99233	1.01521
818	chr2	239771791	240310159	0.955137	1.03252	0.936318	0.980493	1.01116	0.997802	1.0144	0.958199	0.963002	1.0595	0.959445	0.94535	1.01511	0.990545	0.99372	1.00904	0.980689	1.33216	0.977165	0.917044	0.928207	1.00361	0.916036	0.959829	0.988566	0.967539	1.04875	0.984521	1.02357	1.01086	1.01157	0.980297	1.01227	1.05359	0.979611	1.04938	1.01776	1.04206	0.918788	1.01258	1.02204	1.0143	0.99223	1.01288	0.99233	1.01521
819	chr2	240310160	240890328	0.955137	1.03252	0.936318	0.980493	1.01116	0.997802	1.0144	0.958199	0.963002	1.0595	0.959445	0.94535	1.01511	0.990545	0.99372	1.00904	0.980689	1.33216	0.977165	0.917044	0.928207	1.00361	0.916036	0.959829	0.988566	0.967539	1.04875	0.984521	1.02357	1.01086	1.01157	0.980297	1.01227	1.05359	0.979611	1.04938	1.01776	1.04206	0.918788	1.01258	1.02204	1.0143	0.99223	1.01288	0.99233	1.01521
820	chr2	240890329	241439010	0.955137	1.03252	0.936318	0.980493	1.01116	0.997802	1.0144	0.958199	0.963002	1.0595	0.959445	0.94535	1.01511	0.990545	0.99372	1.00904	0.980689	1.33216	0.977165	1.17316	0.928207	1.00361	0.916036	0.959829	0.988566	0.967539	1.04875	0.984521	1.02357	1.01086	1.01157	0.980297	1.01227	1.05359	0.979611	1.04938	1.01776	1.04206	0.918788	1.01258	1.02204	1.0143	0.99223	1.01288	0.99233	1.01521
821	chr2	241439011	242020116	0.955137	1.03252	0.936318	0.980493	1.01116	0.997802	1.0144	0.958199	0.963002	1.0595	0.959445	0.94535	1.01511	0.990545	0.99372	1.00904	0.980689	1.33216	0.977165	1.17316	0.928207	1.00361	0.916036	0.959829	0.988566	0.967539	1.04875	0.984521	1.02357	1.01086	1.01157	0.980297	1.01227	1.05359	0.979611	1.04938	1.01776	1.04206	0.918788	1.01258	1.02204	1.0143	0.99223	1.01288	0.99233	1.01521
822	chr2	242020117	242585353	0.955137	1.03252	0.936318	0.980493	1.01116	0.997802	1.0144	0.958199	0.963002	1.0595	0.959445	0.94535	1.01511	0.990545	0.99372	1.00904	0.980689	1.33216	0.977165	1.17316	0.928207	1.00361	0.916036	0.959829	0.988566	0.967539	1.04875	0.984521	1.02357	1.01086	1.01157	0.980297	1.01227	1.05359	0.979611	1.04938	1.01776	1.04206	0.918788	1.01258	1.02204	1.0143	0.99223	1.01288	0.99233	1.01521
823	chr2	242585354	243199373	0.955137	1.03252	0.936318	0.980493	1.01116	0.997802	1.0144	0.958199	0.963002	1.0595	0.959445	0.94535	1.01511	0.990545	0.99372	1.00904	0.980689	1.33216	0.977165	1.17316	0.928207	1.00361	0.916036	0.959829	0.988566	0.967539	1.04875	0.984521	1.02357	1.01086	1.01157	0.980297	1.01227	1.05359	0.979611	1.04938	1.01776	1.04206	0.918788	1.01258	1.02204	1.0143	0.99223	1.01288	0.99233	1.01521
824	chr3	1	660048	0.955137	1.03252	0.936318	0.980493	1.01116	0.997802	1.0144	0.958199	0.963002	1.0595	0.959445	0.94535	1.01511	0.990545	0.99372	1.00904	0.980689	1.33216	0.977165	1.17316	0.928207	1.00361	0.916036	0.959829	0.988566	0.967539	1.04875	0.984521	1.02357	1.01086	1.01157	0.980297	1.01227	1.05359	0.979611	1.04938	1.01776	1.04206	0.918788	1.01258	1.02204	1.0143	0.99223	1.01288	0.99233	1.01521
825	chr3	660049	1278640	1.07229	1.03479	0.997503	1.01298	1.003	1.08231	0.968313	0.989951	0.960982	1.01349	1.01298	0.982161	1.0248	1.06994	0.96252	1.07154	1.00421	0.78435	0.986887	0.983931	1.0027	0.999	0.972583	1.0013	1.02143	0.979513	1.00451	1.00713	1.09188	1.00451	0.989753	1.02204	1.00501	1.2107	1.0321	0.944311	0.967055	1.02235	1.04112	0.998601	0.9859	1.01867	1.02829	1.00864	1.01491	0.997603
826	chr3	1278641	1911351	1.07229	1.03479	0.997503	1.01298	1.003	1.08231	0.968313	0.989951	0.960982	1.01349	1.01298	0.982161	1.0248	1.06994	0.96252	1.07154	1.00421	0.78435	0.986887	0.983931	1.0027	0.999	0.972583	1.0013	1.02143	0.979513	1.00451	1.00713	1.09188	1.00451	0.989753	1.02204	1.00501	1.2107	1.0321	0.944311	0.967055	1.02235	1.04112	0.998601	0.9859	1.01867	1.02829	1.00864	1.01491	0.997603
827	chr3	1911352	2514064	1.07229	1.03479	0.997503	1.01298	1.003	1.08231	0.968313	0.989951	0.960982	1.01349	1.01298	0.982161	1.0248	1.06994	0.96252	1.07154	1.00421	0.78435	0.986887	0.983931	1.0027	0.999	0.972583	1.0013	1.02143	0.979513	1.00451	1.00713	1.09188	1.00451	0.989753	1.02204	1.00501	1.2107	1.0321	0.944311	0.967055	1.02235	1.04112	0.998601	0.9859	1.01867	1.02829	1.00864	1.01491	0.997603
828	chr3	2514065	3097847	1.07229	1.03479	0.997503	1.01298	1.003	1.08231	0.968313	0.989951	0.960982	1.01349	1.01298	0.982161	1.0248	1.06994	0.96252	1.07154	1.00421	0.78435	0.986887	0.983931	1.0027	0.999	0.972583	1.0013	1.02143	0.979513	1.00451	1.00713	1.09188	1.00451	0.989753	1.02204	1.00501	1.2107	1.0321	0.944311	0.967055	1.02235	1.04112	0.998601	0.9859	1.01867	1.02829	1.00864	1.01491	0.997603
829	chr3	3097848	3680588	1.07229	1.03479	0.997503	1.01298	1.003	1.08231	0.968313	0.989951	0.960982	1.01349	1.01298	0.982161	1.0248	1.06994	0.96252	1.07154	1.00421	0.78435	0.986887	0.983931	1.0027	0.999	0.972583	1.0013	1.02143	0.979513	1.00451	1.00713	1.09188	1.00451	0.989753	1.02204	1.00501	1.2107	1.0321	0.944311	0.967055	1.02235	1.04112	0.998601	0.9859	1.01867	1.02829	1.00864	1.01491	0.997603
830	chr3	3680589	4287433	1.07229	1.03479	0.997503	1.01298	1.003	1.08231	0.968313	0.989951	0.960982	1.01349	1.01298	0.982161	1.0248	1.06994	0.96252	1.07154	1.00421	0.78435	0.986887	0.983931	1.0027	0.999	0.972583	1.0013	1.02143	0.979513	1.00451	1.00713	1.09188	1.00451	0.989753	1.02204	1.00501	1.2107	1.0321	0.944311	0.967055	1.02235	1.04112	0.998601	0.9859	1.01867	1.02829	1.00864	1.01491	0.997603
831	chr3	4287434	4854943	1.07229	1.03479	0.997503	1.01298	1.003	1.08231	0.968313	0.989951	0.960982	1.01349	1.01298	0.982161	1.0248	1.06994	0.96252	1.07154	1.00421	0.78435	0.986887	0.983931	1.0027	0.999	0.972583	1.0013	1.02143	0.979513	1.00451	1.00713	1.09188	1.00451	0.989753	1.02204	1.00501	1.2107	1.0321	0.944311	0.967055	1.02235	1.04112	0.998601	0.9859	1.01867	1.02829	1.00864	1.01491	0.997603
832	chr3	4854944	5426767	1.07229	1.03479	0.997503	1.01298	1.003	1.08231	0.968313	0.989951	0.960982	1.01349	1.01298	0.982161	1.0248	1.06994	0.96252	1.07154	1.00421	0.78435	0.986887	0.983931	1.0027	0.999	0.972583	1.0013	1.02143	0.979513	1.00451	1.00713	1.09188	1.00451	0.989753	1.02204	1.00501	1.2107	1.0321	0.944311	0.967055	1.02235	1.04112	0.998601	0.9859	1.01867	1.02829	1.00864	1.01491	0.997603
833	chr3	5426768	6024881	1.07229	1.03479	0.997503	1.01298	1.003	1.08231	0.968313	0.989951	0.960982	1.01349	1.01298	0.982161	1.0248	1.06994	0.96252	1.07154	1.00421	0.78435	0.986887	0.983931	1.0027	0.999	0.972583	1.0013	1.02143	0.979513	1.00451	1.00713	1.09188	1.00451	0.989753	1.02204	1.00501	1.2107	1.0321	0.944311	0.967055	1.02235	1.04112	0.998601	0.9859	1.01867	1.02829	1.00864	1.01491	0.997603
834	chr3	6024882	6675420	1.07229	1.03479	0.997503	1.01298	1.003	1.08231	0.968313	0.989951	0.960982	1.01349	1.01298	0.982161	1.0248	1.06994	0.96252	1.07154	1.00421	0.78435	0.986887	0.983931	1.0027	0.999	0.972583	1.0013	1.02143	0.979513	1.00451	1.00713	1.09188	1.00451	0.989753	1.02204	1.00501	1.2107	1.0321	0.944311	0.967055	1.02235	1.04112	0.998601	0.9859	1.01867	1.02829	1.00864	1.01491	0.997603
835	chr3	6675421	7280214	1.07229	1.03479	0.997503	1.01298	1.003	1.08231	0.968313	0.989951	0.960982	1.01349	1.01298	0.982161	1.0248	1.06994	0.96252	1.07154	1.00421	0.78435	0.986887	0.983931	1.0027	0.999	0.972583	1.0013	1.02143	0.979513	1.00451	1.00713	1.09188	1.00451	0.989753	1.02204	1.00501	1.2107	1.0321	0.944311	0.967055	1.02235	1.04112	0.998601	0.9859	1.01867	1.02829	1.00864	1.01491	0.997603
836	chr3	7280215	7879896	1.07229	1.03479	0.997503	1.01298	1.003	1.08231	0.968313	0.989951	0.960982	1.01349	1.01298	0.982161	1.0248	1.06994	0.96252	1.07154	1.00421	0.78435	0.986887	0.983931	1.0027	0.999	0.972583	1.0013	1.02143	0.979513	1.00451	1.00713	1.09188	1.00451	0.989753	1.02204	1.00501	1.2107	1.0321	0.944311	0.967055	1.02235	1.04112	0.998601	0.9859	1.01867	1.02829	1.00864	1.01491	0.997603
837	chr3	7879897	8466793	1.07229	1.03479	0.997503	1.01298	1.003	1.08231	0.968313	0.989951	0.960982	1.01349	1.01298	0.982161	1.0248	1.06994	0.96252	1.07154	1.00421	0.78435	0.986887	0.983931	1.0027	0.999	0.972583	1.0013	1.02143	0.979513	1.00451	1.00713	1.09188	1.00451	0.989753	1.02204	1.00501	1.2107	1.0321	0.944311	0.967055	1.02235	1.04112	0.998601	0.9859	1.01867	1.02829	1.00864	1.01491	0.997603
838	chr3	8466794	9004481	1.07229	1.03479	0.997503	1.01298	1.003	1.08231	0.968313	0.989951	0.960982	1.01349	1.01298	0.982161	1.0248	1.06994	0.96252	1.07154	1.00421	0.78435	0.986887	0.983931	1.0027	0.999	0.972583	1.0013	1.02143	0.979513	1.00451	1.00713	1.09188	1.00451	0.989753	1.02204	1.00501	1.2107	1.0321	0.944311	0.967055	1.02235	1.04112	0.998601	0.9859	1.01867	1.02829	1.00864	1.01491	0.997603
839	chr3	9004482	9536286	1.07229	1.03479	0.997503	1.01298	1.003	1.08231	0.968313	0.989951	0.960982	1.01349	1.01298	0.982161	1.0248	1.06994	0.96252	1.07154	1.00421	0.78435	0.986887	0.983931	1.0027	0.999	0.972583	1.0013	1.02143	0.979513	1.00451	1.00713	1.09188	1.00451	0.989753	1.02204	1.00501	1.2107	1.0321	0.944311	0.967055	1.02235	1.04112	0.998601	0.9859	1.01867	1.02829	1.00864	1.01491	0.997603
840	chr3	9536287	10105236	1.07229	1.03479	0.997503	1.01298	1.003	1.08231	0.968313	0.989951	0.960982	1.01349	1.01298	0.982161	1.0248	1.06994	0.96252	1.07154	1.00421	0.78435	0.986887	0.983931	1.0027	0.999	0.972583	1.0013	1.02143	0.979513	1.00451	1.00713	1.09188	1.00451	0.989753	1.02204	1.00501	1.2107	1.0321	0.944311	0.967055	1.02235	1.04112	0.998601	0.9859	1.01867	1.02829	1.00864	1.01491	0.997603
841	chr3	10105237	10636985	1.07229	1.03479	0.997503	1.01298	1.003	1.08231	0.968313	0.989951	0.960982	1.01349	1.01298	0.982161	1.0248	1.06994	0.96252	1.07154	1.00421	0.78435	0.986887	0.983931	1.0027	0.999	0.972583	1.0013	1.02143	0.979513	1.00451	1.00713	1.09188	1.00451	0.989753	1.02204	1.00501	1.2107	1.0321	0.944311	0.967055	1.02235	1.04112	0.998601	0.9859	1.01867	1.02829	1.00864	1.01491	0.997603
842	chr3	10636986	11166312	1.07229	1.03479	0.997503	1.01298	1.003	1.08231	0.968313	0.989951	0.960982	1.01349	1.01298	0.982161	1.0248	1.06994	0.96252	1.07154	1.00421	0.78435	0.986887	0.983931	1.0027	0.999	0.972583	1.0013	1.02143	0.979513	1.00451	1.00713	1.09188	1.00451	0.989753	1.02204	1.00501	1.2107	1.0321	0.944311	0.967055	1.02235	1.04112	0.998601	0.9859	1.01867	1.02829	1.00864	1.01491	0.997603
843	chr3	11166313	11713576	1.07229	1.03479	0.997503	1.01298	1.003	1.08231	0.968313	0.989951	0.960982	0.755557	1.01298	0.982161	1.0248	1.06994	0.96252	1.07154	1.00421	0.78435	0.986887	0.983931	1.0027	0.999	0.972583	1.0013	1.02143	0.979513	1.00451	1.00713	1.09188	1.00451	0.989753	1.02204	1.00501	1.2107	1.0321	0.944311	0.967055	1.02235	1.04112	0.998601	0.9859	1.01867	1.02829	1.00864	1.01491	0.997603
844	chr3	11713577	12278738	1.07229	1.03479	0.997503	1.01298	1.003	1.08231	0.968313	0.989951	0.960982	0.755557	1.01298	0.982161	1.0248	1.06994	0.96252	1.07154	1.00421	0.78435	0.986887	0.983931	1.0027	0.999	0.972583	1.0013	1.02143	0.979513	1.00451	1.00713	1.09188	1.00451	0.989753	1.02204	1.00501	1.2107	1.0321	0.944311	0.967055	1.02235	1.04112	0.998601	0.9859	1.01867	1.02829	1.00864	1.01491	0.997603
845	chr3	12278739	12846322	1.07229	1.03479	0.997503	1.01298	1.003	1.08231	0.968313	0.989951	0.960982	0.755557	1.01298	0.982161	1.0248	1.06994	0.96252	1.07154	1.00421	0.78435	0.986887	0.983931	1.0027	0.999	0.972583	1.0013	1.02143	0.979513	1.00451	1.00713	1.09188	1.00451	0.989753	1.02204	1.00501	1.2107	1.0321	0.944311	0.967055	1.02235	1.04112	0.998601	0.9859	1.01867	1.02829	1.00864	1.01491	0.997603
846	chr3	12846323	13381575	1.07229	1.03479	0.997503	1.01298	1.003	1.08231	0.968313	0.989951	0.960982	0.755557	1.01298	0.982161	1.0248	1.06994	0.96252	1.07154	1.00421	0.78435	0.986887	0.983931	1.0027	0.999	0.972583	1.0013	1.02143	0.979513	1.00451	1.00713	1.09188	1.00451	0.989753	1.02204	1.00501	1.2107	1.0321	0.944311	0.967055	1.02235	1.04112	0.998601	0.9859	1.01867	1.02829	1.00864	1.01491	0.997603
847	chr3	13381576	13918708	1.07229	1.03479	0.997503	1.01298	1.003	1.08231	0.968313	0.989951	0.960982	0.755557	1.01298	0.982161	1.0248	1.06994	0.96252	1.07154	1.00421	0.78435	0.986887	0.983931	1.0027	0.999	0.972583	1.0013	1.02143	0.979513	1.00451	1.00713	1.09188	1.00451	0.989753	1.02204	1.00501	1.2107	1.0321	0.944311	0.967055	1.02235	1.04112	0.998601	0.9859	1.01867	1.02829	1.00864	1.01491	0.997603
848	chr3	13918709	14494067	1.07229	1.03479	0.997503	1.01298	1.003	1.08231	0.968313	0.989951	0.960982	0.755557	1.01298	0.982161	1.0248	1.06994	0.96252	1.07154	1.00421	0.78435	0.986887	0.983931	1.0027	0.999	0.972583	1.0013	1.02143	0.979513	1.00451	1.00713	1.09188	1.00451	0.989753	1.02204	1.00501	1.2107	1.0321	0.944311	0.967055	1.02235	1.04112	0.998601	0.9859	1.01867	1.02829	1.00864	1.01491	0.997603
849	chr3	14494068	15035099	1.07229	1.03479	0.997503	1.01298	1.003	1.08231	0.968313	0.989951	0.960982	0.755557	1.01298	0.982161	1.0248	1.06994	0.96252	1.07154	1.00421	0.78435	0.986887	0.983931	1.0027	0.999	0.972583	1.0013	1.02143	0.979513	1.00451	1.00713	1.09188	1.00451	0.989753	1.02204	1.00501	1.2107	1.0321	0.944311	0.967055	1.02235	1.04112	0.998601	0.9859	1.01867	1.02829	1.00864	1.01491	0.997603
850	chr3	15035100	15572839	1.07229	1.03479	0.997503	1.01298	1.003	1.08231	0.968313	0.989951	0.960982	0.755557	1.01298	0.982161	1.0248	1.06994	0.96252	1.07154	1.00421	0.78435	0.986887	0.983931	1.0027	0.999	0.972583	1.0013	1.02143	0.979513	1.00451	1.00713	1.09188	1.00451	0.989753	1.02204	1.00501	1.2107	1.0321	0.944311	0.967055	1.02235	1.04112	0.998601	0.9859	1.01867	1.02829	1.00864	1.01491	0.997603
851	chr3	15572840	16128224	1.07229	1.03479	0.997503	1.01298	1.003	1.08231	0.968313	0.989951	0.960982	0.755557	1.01298	0.982161	1.0248	1.06994	0.96252	1.07154	1.00421	0.78435	0.986887	0.983931	1.0027	0.999	0.972583	1.0013	1.02143	0.979513	1.00451	1.00713	1.09188	1.00451	0.989753	1.02204	1.00501	1.2107	1.0321	0.944311	0.967055	1.02235	1.04112	0.998601	0.9859	1.01867	1.02829	1.00864	1.01491	0.997603
852	chr3	16128225	16653616	1.07229	1.03479	0.997503	1.01298	1.003	1.08231	0.968313	0.989951	0.960982	0.755557	1.01298	0.982161	1.0248	1.06994	0.96252	1.07154	1.00421	0.78435	0.986887	0.983931	1.0027	0.999	0.972583	1.0013	1.02143	0.979513	1.00451	1.00713	1.09188	1.00451	0.989753	1.02204	1.00501	1.2107	1.0321	0.944311	0.967055	1.02235	1.04112	0.998601	0.9859	1.01867	1.02829	1.00864	1.01491	0.997603
853	chr3	16653617	17187500	1.07229	1.03479	0.997503	1.01298	1.003	1.08231	0.968313	0.989951	0.960982	1.04991	1.01298	0.982161	1.0248	1.06994	0.96252	1.07154	1.00421	0.78435	0.986887	0.983931	1.0027	0.999	0.972583	1.0013	1.02143	0.979513	1.00451	1.00713	1.09188	1.00451	0.989753	1.02204	1.00501	1.2107	1.0321	0.944311	0.967055	1.02235	1.04112	0.998601	0.9859	1.01867	1.02829	1.00864	1.01491	0.997603
854	chr3	17187501	17781748	1.07229	1.03479	0.997503	1.01298	1.003	1.08231	0.968313	0.989951	0.960982	1.04991	1.01298	0.982161	1.0248	1.06994	0.96252	1.07154	1.00421	0.78435	0.986887	0.983931	1.0027	0.999	0.972583	1.0013	1.02143	0.979513	1.00451	1.00713	1.09188	1.00451	0.989753	1.02204	1.00501	1.2107	1.0321	0.944311	0.967055	1.02235	1.04112	0.998601	0.9859	1.01867	1.02829	1.00864	1.01491	0.997603
855	chr3	17781749	18313136	1.07229	1.03479	0.997503	1.01298	1.003	1.08231	0.968313	0.989951	0.960982	1.04991	1.01298	0.982161	1.0248	1.06994	0.96252	1.07154	1.00421	0.78435	0.986887	0.983931	1.0027	0.999	0.972583	1.0013	1.02143	0.979513	1.00451	1.00713	1.09188	1.00451	0.989753	1.02204	1.00501	1.2107	1.0321	0.944311	0.967055	1.02235	1.04112	0.998601	0.9859	1.01867	1.02829	1.00864	1.01491	0.997603
856	chr3	18313137	18873202	1.07229	1.03479	0.997503	1.01298	1.003	1.08231	0.968313	0.989951	0.960982	1.04991	1.01298	0.982161	1.0248	1.06994	0.96252	1.07154	1.00421	0.78435	0.986887	0.983931	1.0027	0.999	0.972583	1.0013	1.02143	0.979513	1.00451	1.00713	1.09188	1.00451	0.989753	1.02204	1.00501	1.2107	1.0321	0.944311	0.967055	1.02235	1.04112	0.998601	0.9859	1.01867	1.02829	1.00864	1.01491	0.997603
857	chr3	18873203	19482567	1.07229	1.03479	0.997503	1.01298	1.003	1.08231	0.968313	0.989951	0.960982	1.04991	1.01298	0.982161	1.0248	1.06994	0.96252	1.07154	1.00421	0.78435	0.986887	0.983931	1.0027	0.999	0.972583	1.0013	1.02143	0.979513	1.00451	1.00713	1.09188	1.00451	0.989753	1.02204	1.00501	1.2107	1.0321	0.944311	0.967055	1.02235	1.04112	0.998601	0.9859	1.01867	1.02829	1.00864	1.01491	0.997603
858	chr3	19482568	20117630	1.07229	1.03479	0.997503	1.01298	1.003	1.08231	0.968313	0.989951	0.960982	1.04991	1.01298	0.982161	1.0248	1.06994	0.96252	1.07154	1.00421	0.78435	0.986887	0.983931	1.0027	0.999	0.972583	1.0013	1.02143	0.979513	1.00451	1.00713	1.09188	1.00451	0.989753	1.02204	1.00501	1.2107	1.0321	0.944311	0.967055	1.02235	1.04112	0.998601	0.9859	1.01867	1.02829	1.00864	1.01491	0.997603
859	chr3	20117631	20708255	1.07229	1.03479	0.997503	1.01298	1.003	1.08231	0.968313	0.989951	0.960982	1.04991	1.01298	0.982161	1.0248	1.06994	0.96252	1.07154	1.00421	0.78435	0.986887	0.983931	1.0027	0.999	0.972583	1.0013	1.02143	0.979513	1.00451	1.00713	1.09188	1.00451	0.989753	1.02204	1.00501	1.2107	1.0321	0.944311	0.967055	1.02235	1.04112	0.998601	0.9859	1.01867	1.02829	1.00864	1.01491	0.997603
860	chr3	20708256	21319187	1.07229	1.03479	0.997503	1.01298	1.003	1.08231	0.968313	0.989951	0.960982	1.04991	1.01298	0.982161	1.0248	1.06994	0.96252	1.07154	1.00421	0.78435	0.986887	0.983931	1.0027	0.999	0.972583	1.0013	1.02143	0.979513	1.00451	1.00713	1.09188	1.00451	0.989753	1.02204	1.00501	1.2107	1.0321	0.944311	0.967055	1.02235	1.04112	0.998601	0.9859	1.01867	1.02829	1.00864	1.01491	0.997603
861	chr3	21319188	21891695	1.07229	1.03479	0.997503	1.01298	1.003	1.08231	0.968313	0.989951	0.960982	1.04991	1.01298	0.982161	1.0248	1.06994	0.96252	1.07154	1.00421	0.78435	0.986887	0.983931	1.0027	0.999	0.972583	1.0013	1.02143	0.979513	1.00451	1.00713	1.09188	1.00451	0.989753	1.02204	1.00501	1.2107	1.0321	0.944311	0.967055	1.02235	1.04112	0.998601	0.9859	1.01867	1.02829	1.00864	1.01491	0.997603
862	chr3	21891696	22492553	1.07229	1.03479	0.997503	1.01298	1.003	1.08231	0.968313	0.989951	0.960982	1.04991	1.01298	0.982161	1.0248	1.06994	0.96252	1.07154	1.00421	0.78435	0.986887	0.983931	1.0027	0.999	0.972583	1.0013	1.02143	0.979513	1.00451	1.00713	1.09188	1.00451	0.989753	1.02204	1.00501	1.2107	1.0321	0.944311	0.967055	1.02235	1.04112	0.998601	0.9859	1.01867	1.02829	1.00864	1.01491	0.997603
863	chr3	22492554	23110221	1.07229	1.03479	0.997503	1.01298	1.003	1.08231	0.968313	0.989951	0.960982	1.04991	1.01298	0.982161	1.0248	1.06994	0.96252	1.07154	1.00421	0.78435	0.986887	0.983931	1.0027	0.999	0.972583	1.0013	1.02143	0.979513	1.00451	1.00713	1.09188	1.00451	0.989753	1.02204	1.00501	1.2107	1.0321	0.944311	0.967055	1.02235	1.04112	0.998601	0.9859	1.01867	1.02829	1.00864	1.01491	0.997603
864	chr3	23110222	23681751	1.07229	1.03479	0.997503	1.01298	1.003	1.08231	0.968313	0.989951	0.960982	1.04991	1.01298	0.982161	1.0248	1.06994	0.96252	1.07154	1.00421	0.78435	0.986887	0.983931	1.0027	0.999	0.972583	1.0013	1.02143	0.979513	1.00451	1.00713	1.09188	1.00451	0.989753	1.02204	1.00501	1.2107	1.0321	0.944311	0.967055	1.02235	1.04112	0.998601	0.9859	1.01867	1.02829	1.00864	1.01491	0.997603
865	chr3	23681752	24242833	1.07229	1.03479	0.997503	1.01298	1.003	1.08231	0.968313	0.989951	0.960982	1.04991	1.01298	0.982161	1.0248	1.06994	0.96252	1.07154	1.00421	0.78435	0.986887	0.983931	1.0027	0.999	0.972583	1.0013	1.02143	0.979513	1.00451	1.00713	1.09188	1.00451	0.989753	1.02204	1.00501	1.2107	1.0321	0.944311	0.967055	1.02235	1.04112	0.998601	0.9859	1.01867	1.02829	1.00864	1.01491	0.997603
866	chr3	24242834	24793772	1.07229	1.03479	0.997503	1.01298	1.003	1.08231	0.968313	0.989951	0.960982	1.04991	1.01298	0.982161	1.0248	1.06994	0.96252	1.07154	1.00421	0.78435	0.986887	0.983931	1.0027	0.999	0.972583	1.0013	1.02143	0.979513	1.00451	1.00713	1.09188	1.00451	0.989753	1.02204	1.00501	1.2107	1.0321	0.944311	0.967055	1.02235	1.04112	0.998601	0.9859	1.01867	1.02829	1.00864	1.01491	0.997603
867	chr3	24793773	25369035	1.07229	1.03479	0.997503	1.01298	1.003	1.08231	0.968313	0.989951	0.960982	1.04991	1.01298	0.982161	1.0248	1.06994	0.96252	1.07154	1.00421	0.78435	0.986887	0.983931	1.0027	0.999	0.972583	1.0013	1.02143	0.979513	1.00451	1.00713	1.09188	1.00451	0.989753	1.02204	1.00501	1.2107	1.0321	0.944311	0.967055	1.02235	1.04112	0.998601	0.9859	1.01867	1.02829	1.00864	1.01491	0.997603
868	chr3	25369036	25901991	1.07229	1.03479	0.997503	1.01298	1.003	1.08231	0.968313	0.989951	0.960982	1.04991	1.01298	0.982161	1.0248	1.06994	0.96252	1.07154	1.00421	0.78435	0.986887	0.983931	1.0027	0.999	0.972583	1.0013	1.02143	0.979513	1.00451	1.00713	1.09188	1.00451	0.989753	1.02204	1.00501	1.2107	1.0321	0.944311	0.967055	1.02235	1.04112	0.998601	0.9859	1.01867	1.02829	1.00864	1.01491	0.997603
869	chr3	25901992	26491080	1.07229	1.03479	0.997503	1.01298	1.003	1.08231	0.968313	0.989951	0.960982	1.04991	1.01298	0.982161	1.0248	1.06994	0.96252	1.07154	1.00421	0.78435	0.986887	0.983931	1.0027	0.999	0.972583	1.0013	1.02143	0.979513	1.00451	1.00713	1.09188	1.00451	0.989753	1.02204	1.00501	1.2107	1.0321	0.944311	0.967055	1.02235	1.04112	0.998601	0.9859	1.01867	1.02829	1.00864	1.01491	0.997603
870	chr3	26491081	27100033	1.07229	1.03479	0.997503	1.01298	1.003	1.08231	0.968313	0.989951	0.960982	1.04991	1.01298	0.982161	1.0248	1.06994	0.96252	1.07154	1.00421	0.78435	0.986887	0.983931	1.0027	0.999	0.972583	1.0013	1.02143	0.979513	1.00451	1.00713	1.09188	1.00451	0.989753	1.02204	1.00501	1.2107	1.0321	0.944311	0.967055	1.02235	1.04112	0.998601	0.9859	1.01867	1.02829	1.00864	1.01491	0.997603
871	chr3	27100034	27683745	1.07229	1.03479	0.997503	1.01298	1.003	1.08231	0.968313	0.989951	0.960982	1.04991	1.01298	0.982161	1.0248	1.06994	0.96252	1.07154	1.00421	0.78435	0.986887	0.983931	1.0027	0.999	0.972583	1.0013	1.02143	0.979513	1.00451	1.00713	1.09188	1.00451	0.989753	1.02204	1.00501	1.2107	1.0321	0.944311	0.967055	1.02235	1.04112	0.998601	0.9859	1.01867	1.02829	1.00864	1.01491	0.997603
872	chr3	27683746	28265448	1.07229	1.03479	0.997503	1.01298	1.003	1.08231	0.968313	0.989951	0.960982	1.04991	1.01298	0.982161	1.0248	1.06994	0.96252	1.07154	1.00421	0.78435	0.986887	0.983931	1.0027	0.999	0.972583	1.0013	1.02143	0.979513	1.00451	1.00713	1.09188	1.00451	0.989753	1.02204	1.00501	1.2107	1.0321	0.944311	0.967055	1.02235	1.04112	0.998601	0.9859	1.01867	1.02829	1.00864	1.01491	0.997603
873	chr3	28265449	28850041	1.07229	1.03479	0.997503	1.01298	1.003	1.08231	0.968313	0.989951	0.960982	1.04991	1.01298	0.982161	1.0248	1.06994	0.96252	1.07154	1.00421	0.78435	0.986887	0.983931	1.0027	0.999	0.972583	1.0013	1.02143	0.979513	1.00451	1.00713	1.09188	1.00451	0.989753	1.02204	1.00501	1.2107	1.0321	0.944311	0.967055	1.02235	1.04112	0.998601	0.9859	1.01867	1.02829	1.00864	1.01491	0.997603
874	chr3	28850042	29391959	1.07229	1.03479	0.997503	1.01298	1.003	1.08231	0.968313	0.989951	0.960982	1.04991	1.01298	0.982161	1.0248	1.06994	0.96252	1.07154	1.00421	0.78435	0.986887	0.983931	1.0027	0.999	0.972583	1.0013	1.02143	0.979513	1.00451	1.00713	1.09188	1.00451	0.989753	1.02204	1.00501	1.05054	1.0321	0.944311	0.967055	1.02235	1.04112	0.998601	0.9859	1.01867	1.02829	1.00864	1.01491	0.997603
875	chr3	29391960	29963758	1.07229	1.03479	0.997503	1.01298	1.003	1.08231	0.968313	0.989951	0.960982	1.04991	1.01298	0.982161	1.0248	1.06994	0.96252	1.07154	1.00421	0.78435	0.986887	0.983931	1.0027	0.999	0.972583	1.0013	1.02143	0.979513	1.00451	1.00713	1.09188	1.00451	0.989753	1.02204	1.00501	1.05054	1.0321	0.944311	0.967055	1.02235	1.04112	0.998601	0.9859	1.01867	1.02829	1.00864	1.01491	0.997603
876	chr3	29963759	30511103	1.07229	1.03479	0.997503	1.01298	1.003	1.08231	0.968313	0.989951	0.960982	1.04991	1.01298	0.982161	1.0248	1.06994	0.96252	1.07154	1.00421	0.78435	0.986887	0.983931	1.0027	0.999	0.972583	1.0013	1.02143	0.979513	1.00451	1.00713	1.09188	1.00451	0.989753	1.02204	1.00501	1.05054	1.0321	0.944311	0.967055	1.02235	1.04112	0.998601	0.9859	1.01867	1.02829	1.00864	1.01491	0.997603
877	chr3	30511104	31061432	1.07229	1.03479	0.997503	1.01298	1.003	0.920719	0.968313	0.989951	0.960982	1.04991	1.01298	0.982161	1.0248	1.06994	0.96252	1.07154	1.00421	0.78435	0.986887	0.983931	1.0027	0.999	0.972583	1.0013	1.02143	0.979513	1.00451	1.00713	1.09188	1.00451	0.989753	1.02204	1.00501	1.05054	1.0321	0.944311	0.967055	1.02235	1.04112	0.998601	0.9859	1.01867	1.02829	1.00864	1.01491	0.997603
878	chr3	31061433	31589827	1.07229	1.03479	0.997503	1.01298	1.003	0.920719	0.968313	0.989951	0.960982	1.04991	1.01298	0.982161	1.0248	1.06994	0.96252	1.07154	1.00421	0.78435	0.986887	0.983931	1.0027	0.999	0.972583	1.0013	1.02143	0.979513	1.00451	1.00713	1.09188	1.00451	0.989753	1.02204	1.00501	1.05054	1.0321	0.944311	0.967055	1.02235	1.04112	0.998601	0.9859	1.01867	1.02829	1.00864	1.01491	0.997603
879	chr3	31589828	32156968	1.07229	1.03479	0.997503	1.01298	1.003	0.920719	0.968313	0.989951	0.960982	1.04991	1.01298	0.982161	1.0248	1.06994	0.96252	1.07154	1.00421	0.78435	0.986887	0.983931	1.0027	0.999	0.972583	1.0013	1.02143	0.979513	1.00451	1.00713	1.09188	1.00451	0.989753	1.02204	1.00501	1.05054	1.0321	0.944311	0.967055	1.02235	1.04112	0.998601	0.9859	1.01867	1.02829	1.00864	1.01491	0.997603
880	chr3	32156969	32719097	1.07229	1.03479	0.997503	1.01298	1.003	0.920719	0.968313	0.989951	0.960982	1.04991	1.01298	0.982161	1.0248	1.06994	0.96252	1.07154	1.00421	0.78435	0.986887	0.983931	1.0027	0.999	0.972583	1.0013	1.02143	0.979513	1.00451	1.00713	1.09188	1.00451	0.989753	1.02204	1.00501	1.05054	1.0321	0.944311	0.967055	1.02235	1.04112	0.998601	0.9859	1.01867	1.02829	1.00864	1.01491	0.997603
881	chr3	32719098	33309540	1.07229	1.03479	0.997503	1.01298	1.003	0.920719	0.968313	0.989951	0.960982	1.04991	1.01298	0.982161	1.0248	1.06994	0.96252	1.07154	1.00421	0.78435	0.986887	0.983931	1.0027	0.999	0.972583	1.0013	1.02143	0.979513	1.00451	1.00713	1.09188	1.00451	0.989753	1.02204	1.00501	1.05054	1.0321	0.944311	0.967055	1.02235	1.04112	0.998601	0.9859	1.01867	1.02829	1.00864	1.01491	0.997603
882	chr3	33309541	33895103	1.07229	1.03479	0.997503	1.01298	1.003	0.920719	0.968313	0.989951	0.960982	1.04991	1.01298	0.982161	1.0248	1.06994	0.96252	1.07154	1.00421	0.78435	0.986887	0.983931	1.0027	0.999	0.972583	1.0013	1.02143	0.979513	1.00451	1.00713	1.09188	1.00451	0.989753	1.02204	1.00501	1.05054	1.0321	0.944311	0.967055	1.02235	1.04112	0.998601	0.9859	1.01867	1.02829	1.00864	1.01491	0.997603
883	chr3	33895104	34452693	1.07229	1.03479	0.997503	1.01298	1.003	0.920719	0.968313	0.989951	0.960982	1.04991	1.01298	0.982161	1.0248	1.06994	0.96252	1.07154	1.00421	0.78435	0.986887	0.983931	1.0027	0.999	0.972583	1.0013	1.02143	0.979513	1.00451	1.00713	1.09188	1.00451	0.989753	1.02204	1.00501	1.05054	1.0321	0.944311	0.967055	1.02235	1.04112	0.998601	0.9859	1.01867	1.02829	1.00864	1.01491	0.997603
884	chr3	34452694	35081101	1.07229	1.03479	0.997503	1.01298	1.003	0.920719	0.968313	0.989951	0.960982	1.04991	1.01298	0.982161	1.0248	1.06994	0.96252	1.07154	1.00421	0.78435	0.986887	0.983931	1.0027	0.999	0.972583	1.0013	1.02143	0.979513	1.00451	1.00713	1.09188	1.00451	0.989753	1.02204	1.00501	1.05054	1.0321	0.944311	0.967055	1.02235	1.04112	0.998601	0.9859	1.01867	1.02829	1.00864	1.01491	0.997603
885	chr3	35081102	35720734	1.07229	1.03479	0.997503	1.01298	1.003	0.920719	0.968313	0.989951	0.960982	1.04991	1.01298	0.982161	1.0248	1.06994	0.96252	1.07154	1.00421	0.78435	0.986887	0.983931	1.0027	0.999	0.972583	1.0013	1.02143	0.979513	1.00451	1.00713	1.09188	1.00451	0.989753	1.02204	1.00501	1.05054	1.0321	0.944311	0.967055	1.02235	1.04112	0.998601	0.9859	1.01867	1.02829	1.00864	1.01491	0.997603
886	chr3	35720735	36313704	1.07229	1.03479	0.997503	1.01298	1.003	0.920719	0.968313	0.989951	0.960982	1.04991	1.01298	0.982161	1.0248	1.06994	0.96252	1.07154	1.00421	0.78435	0.986887	0.983931	1.0027	0.999	0.972583	1.0013	1.02143	0.979513	1.00451	1.00713	1.09188	1.00451	0.989753	1.02204	1.00501	1.05054	1.0321	0.944311	0.967055	1.02235	1.04112	0.998601	0.9859	1.01867	1.02829	1.00864	1.01491	0.997603
887	chr3	36313705	36889229	1.07229	1.03479	0.997503	1.01298	1.003	0.920719	0.968313	0.989951	0.960982	1.04991	1.01298	0.982161	1.0248	1.06994	0.96252	1.07154	1.00421	0.78435	0.986887	0.983931	1.0027	0.999	0.972583	1.0013	1.02143	0.979513	1.00451	1.00713	1.09188	1.00451	0.989753	1.02204	1.00501	1.05054	1.0321	0.944311	0.967055	1.02235	1.04112	0.998601	0.9859	1.01867	1.02829	1.00864	1.01491	0.997603
888	chr3	36889230	37442923	1.07229	1.03479	0.997503	1.01298	1.003	0.920719	0.968313	0.989951	0.960982	1.04991	1.01298	0.982161	1.0248	1.06994	0.96252	1.07154	1.00421	0.78435	0.986887	0.983931	1.0027	0.999	0.972583	1.0013	1.02143	0.979513	1.00451	1.00713	1.09188	1.00451	0.989753	1.02204	1.00501	1.05054	1.0321	0.944311	0.967055	1.02235	1.04112	0.998601	0.9859	1.01867	1.02829	1.00864	1.01491	0.997603
889	chr3	37442924	37983589	1.07229	1.03479	0.997503	1.01298	1.003	0.920719	0.968313	0.989951	0.960982	1.04991	1.01298	0.982161	1.0248	1.06994	0.96252	1.07154	1.00421	0.78435	0.986887	0.983931	1.0027	0.999	0.972583	1.0013	1.02143	0.979513	1.00451	1.00713	1.09188	1.00451	0.989753	1.02204	1.00501	1.05054	1.0321	0.944311	0.967055	1.02235	1.04112	0.998601	0.9859	1.01867	1.02829	1.00864	1.01491	0.997603
890	chr3	37983590	38522674	1.07229	1.03479	0.997503	1.01298	1.003	0.920719	0.968313	0.989951	0.960982	1.04991	1.01298	0.982161	1.0248	1.06994	0.96252	1.07154	1.00421	0.78435	0.986887	0.983931	1.0027	0.999	0.972583	1.0013	1.02143	0.979513	1.00451	1.00713	1.09188	1.00451	0.989753	1.02204	1.00501	1.05054	1.0321	0.944311	0.967055	1.02235	1.04112	0.998601	0.9859	1.01867	1.02829	1.00864	1.01491	0.997603
891	chr3	38522675	39063771	1.07229	1.03479	0.997503	1.01298	1.003	0.920719	0.968313	0.989951	0.960982	1.04991	1.01298	0.982161	1.0248	1.06994	0.96252	1.07154	1.00421	1.17328	0.986887	0.983931	1.0027	0.999	0.972583	1.0013	1.02143	0.979513	1.00451	1.00713	1.09188	1.00451	0.989753	1.02204	1.00501	1.05054	1.0321	0.944311	0.967055	1.02235	1.04112	0.998601	0.9859	1.01867	1.02829	1.00864	1.01491	0.997603
892	chr3	39063772	39637072	1.07229	1.03479	0.997503	1.01298	1.003	0.920719	0.968313	0.989951	0.960982	1.04991	1.01298	0.982161	1.0248	1.06994	0.96252	1.07154	1.00421	1.17328	0.986887	0.983931	1.0027	0.999	0.972583	1.0013	1.02143	0.979513	1.00451	1.00713	1.09188	1.00451	0.989753	1.02204	1.00501	1.05054	1.0321	0.944311	0.967055	1.02235	1.04112	0.998601	0.9859	1.01867	1.02829	1.00864	1.01491	0.997603
893	chr3	39637073	40243321	1.07229	1.03479	0.997503	1.01298	1.003	0.920719	0.968313	0.989951	0.960982	1.04991	1.01298	0.982161	1.0248	1.06994	0.96252	1.07154	1.00421	1.17328	0.986887	0.983931	1.0027	0.999	0.972583	1.0013	1.02143	0.979513	1.00451	1.00713	1.09188	1.00451	0.989753	1.02204	1.00501	1.05054	1.0321	0.944311	0.967055	1.02235	1.04112	0.998601	0.9859	1.01867	1.02829	1.00864	1.01491	0.997603
894	chr3	40243322	40810171	1.07229	1.03479	0.997503	1.01298	1.003	0.920719	0.968313	0.989951	0.960982	1.04991	1.01298	0.982161	1.0248	1.06994	0.96252	1.07154	1.00421	1.17328	0.986887	0.983931	1.0027	0.999	0.972583	1.0013	1.02143	0.979513	1.00451	1.00713	1.09188	1.00451	0.989753	1.02204	1.00501	1.05054	1.0321	0.944311	0.967055	1.02235	1.04112	0.998601	0.9859	1.01867	1.02829	1.00864	1.01491	0.997603
895	chr3	40810172	41355744	1.07229	1.03479	0.997503	1.01298	1.003	0.920719	0.968313	0.989951	0.960982	1.04991	1.01298	0.982161	1.0248	1.06994	0.96252	1.07154	1.00421	1.17328	0.986887	0.983931	1.0027	0.999	0.972583	1.0013	1.02143	0.979513	1.00451	1.00713	1.09188	1.00451	0.989753	1.02204	1.00501	1.05054	1.0321	0.944311	0.967055	1.02235	1.04112	0.998601	0.9859	1.01867	1.02829	1.00864	1.01491	0.997603
896	chr3	41355745	41945397	1.07229	1.03479	0.997503	1.01298	1.003	0.920719	1.36957	0.989951	0.960982	1.04991	1.01298	0.982161	1.0248	1.06994	0.96252	1.07154	1.00421	1.17328	0.986887	0.983931	1.0027	0.999	0.972583	1.0013	1.02143	0.979513	1.00451	1.00713	1.09188	1.00451	0.989753	1.02204	1.00501	1.05054	1.0321	0.944311	0.967055	1.02235	1.04112	0.998601	0.9859	1.01867	1.02829	1.00864	1.01491	0.997603
897	chr3	41945398	42499187	1.07229	1.03479	0.997503	1.01298	1.003	0.920719	1.36957	0.989951	0.960982	1.04991	1.01298	0.982161	1.0248	1.06994	0.96252	1.07154	1.00421	1.17328	0.986887	0.983931	1.0027	0.999	0.972583	1.0013	1.02143	0.979513	1.00451	1.00713	1.09188	1.00451	0.989753	1.02204	1.00501	1.05054	1.0321	0.944311	0.967055	1.02235	1.04112	0.998601	0.9859	1.01867	1.02829	1.00864	1.01491	0.997603
898	chr3	42499188	43056167	1.07229	1.03479	0.997503	1.01298	1.003	0.920719	1.36957	0.989951	0.960982	1.04991	1.01298	0.982161	1.0248	1.06994	0.96252	1.07154	1.00421	1.17328	0.986887	0.983931	1.0027	0.999	0.972583	1.0013	1.02143	0.979513	1.00451	1.00713	1.09188	1.00451	0.989753	1.02204	1.00501	1.05054	1.0321	0.944311	0.967055	1.02235	1.04112	0.998601	0.9859	1.01867	1.02829	1.00864	1.01491	0.997603
899	chr3	43056168	43587896	1.07229	1.03479	0.997503	1.01298	1.003	0.920719	1.36957	0.989951	0.960982	1.04991	1.01298	0.982161	1.0248	1.06994	0.96252	1.07154	1.00421	1.17328	0.986887	0.983931	1.0027	0.999	0.972583	1.0013	1.02143	0.979513	1.00451	1.00713	1.09188	1.00451	0.989753	1.02204	1.00501	1.05054	1.0321	0.944311	0.967055	1.02235	1.04112	0.998601	0.9859	1.01867	1.02829	1.00864	1.01491	0.997603
900	chr3	43587897	44124223	1.07229	1.03479	0.997503	1.01298	1.003	0.920719	0.963387	0.989951	0.960982	1.04991	1.01298	0.982161	1.0248	1.06994	0.96252	1.07154	1.00421	1.17328	0.986887	0.983931	1.0027	0.999	0.972583	1.0013	1.02143	0.979513	1.00451	1.00713	1.09188	1.00451	0.989753	1.02204	1.00501	1.05054	1.0321	0.944311	0.967055	1.02235	1.04112	0.998601	0.9859	1.01867	1.02829	1.00864	1.01491	0.997603
901	chr3	44124224	44679167	1.07229	1.03479	0.997503	1.01298	1.003	0.920719	0.963387	0.989951	0.960982	1.04991	1.01298	0.982161	1.0248	1.06994	0.96252	1.07154	1.00421	1.17328	0.986887	0.983931	1.0027	0.999	0.972583	1.0013	1.02143	0.979513	1.00451	1.00713	1.09188	1.00451	0.989753	1.02204	1.00501	1.05054	1.0321	0.944311	0.967055	1.02235	1.04112	0.998601	0.9859	1.01867	1.02829	1.00864	1.01491	0.997603
902	chr3	44679168	45202134	1.07229	1.03479	0.997503	1.01298	1.003	0.920719	0.963387	0.989951	0.960982	1.04991	1.01298	0.982161	1.0248	1.06994	0.96252	1.07154	1.00421	1.17328	0.986887	0.983931	1.0027	0.999	0.972583	1.0013	1.02143	0.979513	1.00451	1.00713	1.09188	1.00451	0.989753	1.02204	1.00501	1.05054	1.0321	0.944311	0.967055	1.02235	1.04112	0.998601	0.9859	1.01867	1.02829	1.00864	1.01491	0.997603
903	chr3	45202135	45720895	1.07229	1.03479	0.997503	1.01298	1.003	0.920719	0.963387	0.989951	0.960982	1.04991	1.01298	0.982161	1.0248	1.06994	0.96252	1.07154	1.00421	1.17328	0.986887	0.983931	1.0027	0.999	0.972583	1.0013	1.02143	0.979513	1.00451	1.00713	1.09188	1.00451	0.989753	1.02204	1.00501	1.05054	1.0321	0.944311	0.967055	1.02235	1.04112	0.998601	0.9859	1.01867	1.02829	1.00864	1.01491	0.997603
904	chr3	45720896	46235561	1.07229	1.03479	0.997503	1.01298	1.003	0.920719	0.963387	0.989951	0.960982	1.04991	1.01298	0.982161	1.0248	1.06994	0.96252	1.07154	1.00421	1.17328	0.986887	0.983931	1.0027	0.999	0.972583	1.0013	1.02143	0.979513	1.00451	1.00713	1.09188	1.00451	0.989753	1.02204	1.00501	1.05054	1.0321	0.944311	0.967055	1.02235	1.04112	0.998601	0.9859	1.01867	1.02829	1.00864	1.01491	0.997603
905	chr3	46235562	46779957	1.07229	1.03479	0.997503	1.01298	1.003	0.920719	0.963387	0.989951	0.960982	1.04991	1.01298	0.982161	1.0248	1.06994	0.96252	1.07154	1.00421	1.17328	0.986887	0.983931	1.0027	0.999	0.972583	1.0013	1.02143	0.979513	1.00451	1.00713	1.09188	1.00451	0.989753	1.02204	1.00501	1.05054	1.0321	0.944311	0.967055	1.02235	1.04112	0.998601	0.9859	1.01867	1.02829	1.00864	1.01491	0.997603
906	chr3	46779958	47357350	1.07229	1.03479	0.997503	1.01298	1.003	0.920719	0.963387	0.989951	0.960982	1.04991	1.01298	0.982161	1.0248	1.06994	0.96252	1.07154	1.00421	1.17328	0.986887	0.983931	1.0027	0.999	0.972583	1.0013	1.02143	0.979513	1.00451	1.00713	1.09188	1.00451	0.989753	1.02204	1.00501	1.05054	1.0321	0.944311	0.967055	1.02235	1.04112	0.998601	0.9859	1.01867	1.02829	1.00864	1.01491	0.997603
907	chr3	47357351	47942045	1.07229	1.03479	0.997503	1.01298	1.003	0.920719	0.963387	0.989951	0.960982	1.04991	1.01298	0.982161	1.0248	1.06994	0.96252	1.07154	1.00421	1.17328	0.986887	0.983931	1.0027	0.999	0.972583	1.0013	1.02143	0.979513	1.00451	1.00713	1.09188	1.00451	0.989753	1.02204	1.00501	1.05054	1.0321	0.944311	0.967055	1.02235	1.04112	0.998601	0.9859	1.01867	1.02829	1.00864	1.01491	0.997603
908	chr3	47942046	48533983	1.07229	1.03479	0.997503	1.01298	1.003	0.920719	0.963387	0.989951	0.960982	1.04991	1.01298	0.982161	1.0248	1.06994	0.96252	1.07154	1.00421	1.17328	0.986887	0.983931	1.0027	0.999	0.972583	1.0013	1.02143	0.979513	1.00451	1.00713	1.09188	1.00451	0.989753	1.02204	1.00501	1.05054	1.0321	0.944311	0.967055	1.02235	1.04112	0.998601	0.9859	1.01867	1.02829	1.00864	1.01491	0.997603
909	chr3	48533984	49128224	1.07229	1.03479	0.997503	1.01298	1.003	0.920719	0.963387	0.989951	0.960982	1.04991	1.01298	0.982161	1.0248	1.06994	0.96252	1.07154	1.00421	1.17328	0.986887	0.983931	1.0027	0.999	0.972583	1.0013	1.02143	0.979513	1.00451	1.00713	1.09188	1.00451	0.989753	1.02204	1.00501	1.05054	1.0321	0.944311	0.967055	1.02235	1.04112	0.998601	0.9859	1.01867	1.02829	1.00864	1.01491	0.997603
910	chr3	49128225	49704877	1.07229	1.03479	0.997503	1.01298	1.003	0.920719	0.963387	0.989951	0.960982	1.04991	1.01298	0.982161	1.0248	1.06994	0.96252	1.07154	1.00421	1.17328	0.986887	0.983931	1.0027	0.999	0.972583	1.0013	1.02143	0.979513	1.00451	1.00713	1.09188	1.00451	0.989753	1.02204	1.00501	1.05054	1.0321	0.944311	0.967055	1.02235	1.04112	0.998601	0.9859	1.01867	1.02829	1.00864	1.01491	0.997603
911	chr3	49704878	50260844	1.07229	1.03479	0.997503	1.01298	1.003	0.920719	0.963387	0.989951	0.960982	1.04991	1.01298	0.982161	1.0248	1.06994	0.96252	1.07154	1.00421	1.17328	0.986887	0.983931	1.0027	0.999	0.972583	1.0013	1.02143	0.979513	1.00451	1.00713	1.09188	1.00451	0.989753	1.02204	1.00501	1.05054	1.0321	0.944311	0.967055	1.02235	1.04112	0.998601	0.9859	1.01867	1.02829	1.00864	1.01491	0.997603
912	chr3	50260845	50797501	1.07229	1.03479	0.997503	1.01298	1.003	0.920719	0.963387	0.989951	0.960982	1.04991	1.01298	0.982161	1.0248	1.06994	0.96252	1.07154	1.00421	1.17328	0.986887	0.983931	1.0027	0.999	0.972583	1.0013	1.02143	0.979513	1.00451	1.00713	1.09188	1.00451	0.989753	1.02204	1.00501	1.05054	1.0321	0.944311	0.967055	1.02235	1.04112	0.998601	0.9859	1.01867	1.02829	1.00864	1.01491	0.997603
913	chr3	50797502	51437562	1.07229	1.03479	0.997503	1.01298	1.003	0.920719	0.963387	0.989951	0.960982	1.04991	1.01298	0.982161	1.0248	1.06994	0.96252	1.07154	1.00421	1.17328	0.986887	0.983931	1.0027	0.999	0.972583	1.0013	1.02143	0.979513	1.00451	1.00713	1.09188	1.00451	0.989753	1.02204	1.00501	1.05054	1.0321	0.944311	0.967055	1.02235	1.04112	0.998601	0.9859	1.01867	1.02829	1.00864	1.01491	0.997603
914	chr3	51437563	52049225	1.07229	1.03479	0.997503	1.01298	1.003	0.920719	0.963387	0.989951	0.960982	1.04991	1.01298	0.982161	1.0248	1.06994	0.96252	1.07154	1.00421	1.17328	0.986887	0.983931	1.0027	0.999	0.972583	1.0013	1.02143	0.979513	1.00451	1.00713	1.09188	1.00451	0.989753	1.02204	1.00501	1.05054	1.0321	0.944311	0.967055	1.02235	1.04112	0.998601	0.9859	1.01867	1.02829	1.00864	1.01491	0.997603
915	chr3	52049226	52572622	1.07229	1.03479	0.997503	1.01298	1.003	0.920719	0.963387	0.989951	0.960982	1.04991	1.01298	0.982161	1.0248	1.06994	0.96252	1.07154	1.00421	1.17328	0.986887	0.983931	1.0027	0.999	0.972583	1.0013	1.02143	0.979513	1.00451	1.00713	1.09188	1.00451	0.989753	1.02204	1.00501	1.05054	1.0321	0.944311	0.967055	1.02235	1.04112	0.998601	0.9859	1.01867	1.02829	1.00864	1.01491	0.997603
916	chr3	52572623	53144358	1.07229	1.03479	0.997503	1.01298	1.003	0.920719	0.963387	0.989951	0.960982	1.04991	1.01298	0.982161	1.0248	1.06994	0.96252	1.07154	1.00421	1.17328	0.986887	0.983931	1.0027	0.999	0.972583	1.0013	1.02143	0.979513	1.00451	1.00713	1.09188	1.00451	0.989753	1.02204	1.00501	1.05054	1.0321	0.944311	0.967055	1.02235	1.04112	0.998601	0.9859	1.01867	1.02829	1.00864	1.01491	0.997603
917	chr3	53144359	53716970	1.07229	1.03479	0.997503	1.01298	1.003	0.920719	0.963387	0.989951	0.960982	1.04991	1.01298	0.982161	1.0248	1.06994	0.96252	1.07154	1.00421	1.17328	0.986887	0.983931	1.0027	0.999	0.972583	1.0013	1.02143	0.979513	1.00451	1.00713	1.09188	1.00451	0.989753	1.02204	1.00501	1.05054	1.0321	0.944311	0.967055	1.02235	1.04112	0.998601	0.9859	1.01867	1.02829	1.00864	1.01491	0.997603
918	chr3	53716971	54270764	1.07229	1.03479	0.997503	1.01298	1.003	0.920719	0.963387	0.989951	0.960982	1.04991	1.01298	0.982161	1.0248	1.06994	0.96252	1.07154	1.00421	1.17328	0.986887	0.983931	1.0027	0.999	0.972583	1.0013	1.02143	0.979513	1.00451	1.00713	1.09188	1.00451	0.989753	1.02204	1.00501	1.05054	1.0321	0.944311	0.967055	1.02235	1.04112	0.998601	0.9859	1.01867	1.02829	1.00864	1.01491	0.997603
919	chr3	54270765	54820051	1.07229	1.03479	0.997503	1.01298	1.003	0.920719	0.963387	0.989951	0.960982	1.04991	1.01298	0.982161	1.0248	1.06994	0.96252	1.07154	1.00421	0.659153	0.986887	0.983931	1.0027	0.999	0.972583	1.0013	1.02143	0.979513	1.00451	1.00713	1.09188	1.00451	0.989753	1.02204	1.00501	1.05054	1.0321	0.944311	0.967055	1.02235	1.04112	0.998601	0.9859	1.01867	1.02829	1.00864	1.01491	0.997603
920	chr3	54820052	55351836	1.07229	1.03479	0.997503	1.01298	1.003	0.920719	0.963387	0.989951	0.960982	1.04991	1.01298	0.982161	1.0248	1.06994	0.96252	1.07154	1.00421	0.659153	0.986887	0.983931	1.0027	0.999	0.972583	1.0013	1.02143	0.979513	1.00451	1.00713	1.09188	1.00451	0.989753	1.02204	1.00501	1.05054	1.0321	0.944311	0.967055	1.02235	1.04112	0.998601	0.9859	1.01867	1.02829	1.00864	1.01491	0.997603
921	chr3	55351837	55877584	1.07229	1.03479	0.997503	1.01298	1.003	0.920719	0.963387	0.989951	0.960982	1.04991	1.01298	0.982161	1.0248	1.06994	0.96252	1.07154	1.00421	0.659153	0.986887	0.983931	1.0027	0.999	0.972583	1.0013	1.02143	0.979513	1.00451	1.00713	1.09188	1.00451	0.989753	1.02204	1.00501	1.05054	1.0321	0.944311	0.967055	1.02235	1.04112	0.998601	0.9859	1.01867	1.02829	1.00864	1.01491	0.997603
922	chr3	55877585	56430114	1.07229	1.03479	0.997503	1.01298	1.003	0.920719	0.963387	0.989951	0.960982	1.04991	1.01298	0.982161	1.0248	1.06994	0.96252	1.07154	1.00421	0.659153	0.986887	0.983931	1.0027	0.999	0.972583	1.0013	1.02143	0.979513	1.00451	1.00713	1.09188	1.00451	0.989753	1.02204	1.00501	1.05054	1.0321	0.944311	0.967055	1.02235	1.04112	0.998601	0.9859	1.01867	1.02829	1.00864	1.01491	0.997603
923	chr3	56430115	57014024	1.07229	1.03479	0.997503	1.01298	1.003	0.920719	0.963387	0.989951	0.960982	1.04991	1.01298	0.982161	1.0248	1.06994	0.96252	1.07154	1.00421	0.659153	0.986887	0.983931	1.0027	0.999	0.972583	1.0013	1.02143	0.979513	1.00451	1.00713	1.09188	1.00451	0.989753	1.02204	1.00501	1.05054	1.0321	0.944311	0.967055	1.02235	1.04112	0.998601	0.9859	1.01867	1.02829	1.00864	1.01491	0.997603
924	chr3	57014025	57616689	1.07229	1.03479	0.997503	1.01298	1.003	0.920719	0.963387	0.989951	0.960982	1.04991	1.01298	0.982161	1.0248	1.06994	0.96252	1.07154	1.00421	0.659153	0.986887	0.983931	1.0027	0.999	0.972583	1.0013	1.02143	0.979513	1.00451	1.00713	1.09188	1.00451	0.989753	1.02204	1.00501	1.05054	1.0321	0.944311	0.967055	1.02235	1.04112	0.998601	0.9859	1.01867	1.02829	1.00864	1.01491	0.997603
925	chr3	57616690	58159775	1.07229	1.03479	0.997503	1.01298	1.003	0.920719	0.963387	0.989951	0.960982	1.04991	1.01298	0.982161	1.0248	1.06994	0.96252	1.07154	1.00421	0.659153	0.986887	0.983931	1.0027	0.999	0.972583	1.0013	1.02143	0.979513	1.00451	1.00713	1.09188	1.00451	0.989753	1.02204	1.00501	1.05054	1.0321	0.944311	0.967055	1.02235	1.04112	0.998601	0.9859	1.01867	1.02829	1.00864	1.01491	0.997603
926	chr3	58159776	58690519	1.07229	1.03479	0.997503	1.01298	1.003	0.920719	0.963387	0.989951	0.960982	1.04991	1.01298	0.982161	1.0248	1.06994	0.96252	1.07154	1.00421	0.950849	0.986887	0.983931	1.0027	0.999	0.972583	1.0013	1.02143	0.979513	1.00451	1.00713	1.09188	1.00451	0.989753	1.02204	1.00501	1.05054	1.0321	0.944311	0.967055	1.02235	1.04112	0.998601	0.9859	1.01867	1.02829	1.00864	1.01491	0.997603
927	chr3	58690520	59274973	1.07229	1.03479	0.997503	1.01298	1.003	0.920719	0.963387	0.989951	0.960982	1.04991	1.01298	0.982161	1.0248	1.06994	0.96252	1.07154	1.00421	0.950849	0.986887	0.983931	1.0027	0.999	0.972583	1.0013	1.02143	0.979513	1.00451	1.00713	1.09188	1.00451	0.989753	1.02204	1.00501	1.05054	1.0321	0.944311	0.967055	1.02235	1.04112	0.998601	0.9859	1.01867	1.02829	1.00864	1.01491	0.997603
928	chr3	59274974	59809329	1.07229	1.03479	0.997503	1.01298	1.003	0.920719	0.963387	0.989951	0.960982	1.04991	1.01298	0.982161	1.0248	1.06994	0.96252	1.07154	1.00421	0.950849	0.986887	0.983931	1.0027	0.999	0.972583	1.0013	1.02143	0.979513	1.00451	1.00713	1.09188	1.00451	0.989753	1.02204	1.00501	1.05054	1.0321	0.944311	0.967055	1.02235	1.04112	0.998601	0.9859	1.01867	1.02829	1.00864	1.01491	0.997603
929	chr3	59809330	60335054	1.07229	1.03479	0.997503	1.01298	1.003	0.920719	0.963387	0.989951	0.960982	1.04991	1.01298	0.982161	1.0248	1.06994	0.96252	1.07154	1.00421	0.950849	0.986887	0.983931	1.0027	0.999	0.972583	1.0013	1.02143	0.979513	1.00451	1.00713	1.09188	1.00451	0.989753	1.02204	1.00501	1.05054	1.0321	0.944311	0.967055	1.02235	1.04112	0.998601	0.9859	1.01867	1.02829	1.00864	1.01491	0.997603
930	chr3	60335055	60902697	1.07229	1.03479	0.997503	1.01298	1.003	0.920719	0.963387	0.989951	0.960982	1.04991	1.01298	0.982161	1.0248	1.06994	0.96252	1.07154	1.00421	0.950849	0.986887	0.983931	1.0027	0.999	0.972583	1.0013	1.02143	0.979513	1.00451	1.00713	1.09188	1.00451	0.989753	1.02204	1.00501	1.05054	1.0321	0.944311	0.967055	1.02235	1.04112	0.998601	0.9859	1.01867	1.02829	1.00864	1.01491	0.997603
931	chr3	60902698	61498295	1.07229	1.03479	0.997503	1.01298	1.003	0.920719	0.963387	0.989951	0.960982	1.04991	1.01298	0.982161	1.0248	1.06994	0.96252	1.07154	1.00421	0.950849	0.986887	0.983931	1.0027	0.999	0.972583	1.0013	1.02143	0.979513	1.00451	1.00713	1.09188	1.00451	0.989753	1.02204	1.00501	1.05054	1.0321	0.944311	0.967055	1.02235	1.04112	0.998601	0.9859	1.01867	1.02829	1.00864	1.01491	0.997603
932	chr3	61498296	62070998	1.07229	1.03479	0.997503	1.01298	1.003	0.920719	0.963387	0.989951	0.960982	1.04991	1.01298	0.982161	1.0248	1.06994	0.96252	1.07154	1.00421	0.950849	0.986887	0.983931	1.0027	0.999	0.972583	1.0013	1.02143	0.979513	1.00451	1.00713	1.09188	1.00451	0.989753	1.02204	1.00501	1.05054	1.0321	0.944311	0.967055	1.02235	1.04112	0.998601	0.9859	1.01867	1.02829	1.00864	1.01491	0.997603
933	chr3	62070999	62602561	1.07229	1.03479	0.997503	1.01298	1.003	0.920719	0.963387	0.989951	0.960982	1.04991	1.01298	0.982161	1.0248	1.06994	0.96252	1.07154	1.00421	0.950849	0.986887	0.983931	1.0027	0.999	0.972583	1.0013	1.02143	0.979513	1.00451	1.00713	1.09188	1.00451	0.989753	1.02204	1.00501	1.05054	1.0321	0.944311	0.967055	1.02235	1.04112	0.998601	0.9859	1.01867	1.02829	1.00864	1.01491	0.997603
934	chr3	62602562	63142392	1.07229	1.03479	0.997503	1.01298	1.003	0.920719	0.963387	0.989951	0.960982	1.04991	1.01298	0.982161	1.0248	1.06994	0.96252	1.07154	1.00421	0.950849	0.986887	0.983931	1.0027	0.999	0.972583	1.0013	1.02143	0.979513	1.00451	1.00713	1.09188	1.00451	0.989753	1.02204	1.00501	1.05054	1.0321	0.944311	0.967055	1.02235	1.04112	0.998601	0.9859	1.01867	1.02829	1.00864	1.01491	0.997603
935	chr3	63142393	63711946	1.07229	1.03479	0.997503	1.01298	1.003	0.920719	0.963387	0.989951	0.960982	1.04991	1.01298	0.982161	1.0248	1.06994	0.96252	1.07154	1.00421	0.950849	0.986887	0.983931	1.0027	0.999	0.972583	1.0013	1.02143	0.979513	1.00451	1.00713	1.09188	1.00451	0.989753	1.02204	1.00501	1.05054	1.0321	0.944311	0.967055	1.02235	1.04112	0.998601	0.9859	1.01867	1.02829	1.00864	1.01491	0.997603
936	chr3	63711947	64225502	1.07229	1.03479	0.997503	1.01298	1.003	0.920719	0.963387	0.989951	0.960982	1.04991	1.01298	0.982161	1.0248	1.06994	0.96252	1.07154	1.00421	0.950849	0.986887	0.983931	1.0027	0.999	0.972583	1.0013	1.02143	0.979513	0.701384	1.00713	1.09188	1.00451	0.989753	1.02204	1.00501	1.05054	1.0321	0.944311	0.967055	1.02235	1.04112	0.998601	0.9859	1.01867	1.02829	1.00864	1.01491	0.997603
937	chr3	64225503	64744874	1.07229	1.03479	0.997503	1.01298	1.003	0.920719	0.963387	0.989951	0.960982	1.04991	1.01298	0.982161	1.0248	1.06994	0.96252	1.07154	1.00421	0.950849	0.986887	0.983931	1.0027	0.999	0.972583	1.0013	1.02143	0.979513	0.701384	1.00713	1.09188	1.00451	0.989753	1.02204	1.00501	1.05054	1.0321	0.944311	0.967055	1.02235	1.04112	0.998601	0.9859	1.01867	1.02829	1.00864	1.01491	0.997603
938	chr3	64744875	65283641	1.07229	1.03479	0.997503	1.01298	1.003	0.920719	0.963387	0.989951	0.960982	1.04991	1.01298	0.982161	1.0248	1.06994	0.96252	1.07154	1.00421	0.950849	0.986887	0.983931	1.0027	0.999	0.972583	1.0013	1.02143	0.979513	0.701384	1.00713	1.09188	1.00451	0.989753	1.02204	1.00501	1.05054	1.0321	0.944311	0.967055	1.02235	1.04112	0.998601	0.9859	1.01867	1.02829	1.00864	1.01491	0.997603
939	chr3	65283642	65824786	1.07229	1.03479	0.997503	1.01298	1.003	0.920719	0.963387	0.989951	0.960982	1.04991	1.01298	0.982161	1.0248	1.06994	0.96252	1.07154	1.00421	0.950849	0.986887	0.983931	1.0027	0.999	0.972583	1.0013	1.02143	0.979513	0.973653	1.00713	1.09188	1.00451	0.989753	1.02204	1.00501	1.05054	1.0321	0.944311	0.967055	1.02235	1.04112	0.998601	0.9859	1.01867	1.02829	1.00864	1.01491	0.997603
940	chr3	65824787	66444432	1.07229	1.03479	0.997503	1.01298	1.003	0.920719	0.963387	0.989951	0.960982	1.04991	1.01298	0.982161	1.0248	1.06994	0.96252	1.07154	1.00421	0.950849	0.986887	0.983931	1.0027	0.999	0.972583	1.0013	1.02143	0.979513	0.973653	1.00713	1.09188	1.00451	0.989753	1.02204	1.00501	1.05054	1.0321	0.944311	0.967055	1.02235	1.04112	0.998601	0.9859	1.01867	1.02829	1.00864	1.01491	0.997603
941	chr3	66444433	67003910	1.07229	1.03479	0.997503	1.01298	1.003	0.920719	0.963387	0.989951	0.960982	1.04991	1.01298	0.982161	1.0248	1.06994	0.96252	1.07154	1.00421	0.950849	0.986887	0.983931	1.0027	0.999	0.972583	1.0013	1.02143	0.979513	0.973653	1.00713	1.09188	1.00451	0.989753	1.02204	1.00501	1.05054	1.0321	0.944311	0.967055	1.02235	1.04112	0.998601	0.9859	1.01867	1.02829	1.00864	1.01491	0.997603
942	chr3	67003911	67588864	1.07229	1.03479	0.997503	1.01298	1.003	0.920719	0.963387	0.989951	0.960982	1.04991	1.01298	0.982161	1.0248	1.06994	0.96252	1.07154	1.00421	0.950849	0.986887	0.983931	1.0027	0.999	0.972583	1.0013	1.02143	0.979513	0.973653	1.00713	1.09188	1.00451	0.989753	1.02204	1.00501	1.05054	1.0321	0.944311	0.967055	1.02235	1.04112	0.998601	0.9859	1.01867	1.02829	1.00864	1.01491	0.997603
943	chr3	67588865	68186644	1.07229	1.03479	0.997503	1.01298	1.003	0.920719	0.963387	0.989951	0.960982	1.04991	1.01298	0.982161	1.0248	1.06994	0.96252	1.07154	1.00421	0.950849	0.986887	0.983931	1.0027	0.999	0.972583	1.0013	1.02143	0.979513	0.973653	1.00713	1.09188	1.00451	0.989753	1.02204	1.00501	1.05054	1.0321	0.944311	0.967055	1.02235	1.04112	0.998601	0.9859	1.01867	1.02829	1.00864	1.01491	0.997603
944	chr3	68186645	68797815	1.07229	1.03479	0.997503	1.01298	1.003	0.920719	0.963387	0.989951	0.960982	1.04991	1.01298	0.982161	1.0248	1.06994	0.96252	1.07154	1.00421	0.950849	0.986887	0.983931	1.0027	0.999	0.972583	1.0013	1.02143	0.979513	0.973653	1.00713	1.09188	1.00451	0.989753	1.02204	1.00501	1.05054	1.0321	0.944311	0.967055	1.02235	1.04112	0.998601	0.9859	1.01867	1.02829	1.00864	1.01491	0.997603
945	chr3	68797816	69376664	1.07229	1.03479	0.997503	1.01298	1.003	0.920719	0.963387	0.989951	0.960982	1.04991	1.01298	0.982161	1.0248	1.06994	0.96252	1.07154	1.00421	0.950849	0.986887	0.983931	1.0027	0.999	0.972583	1.0013	1.02143	0.979513	0.973653	1.00713	1.09188	1.00451	0.989753	1.02204	1.00501	1.05054	1.0321	0.944311	0.967055	1.02235	1.04112	0.998601	0.9859	1.01867	1.02829	1.00864	1.01491	0.997603
946	chr3	69376665	69941299	1.07229	1.03479	0.997503	1.01298	1.003	0.920719	0.963387	0.989951	0.960982	1.04991	1.01298	0.982161	1.0248	1.06994	0.96252	1.07154	1.00421	0.950849	0.986887	0.983931	1.0027	0.999	0.972583	1.0013	1.02143	0.979513	0.973653	1.00713	1.09188	1.00451	0.989753	1.02204	1.00501	1.05054	1.0321	0.944311	0.967055	1.02235	1.04112	0.998601	0.9859	1.01867	1.02829	1.00864	1.01491	0.997603
947	chr3	69941300	70523065	1.07229	1.03479	0.997503	1.01298	1.003	0.920719	0.963387	0.989951	0.960982	1.04991	1.01298	0.982161	1.0248	1.06994	0.96252	1.07154	1.00421	0.950849	0.986887	0.983931	1.0027	0.999	0.972583	1.0013	1.02143	0.979513	0.973653	1.00713	1.09188	1.00451	0.989753	1.02204	1.00501	1.05054	1.0321	0.944311	0.967055	1.02235	1.04112	0.998601	0.9859	1.01867	1.02829	1.00864	1.01491	0.997603
948	chr3	70523066	71081020	1.07229	1.03479	0.997503	1.01298	1.003	0.920719	0.963387	0.989951	0.960982	1.04991	1.01298	0.982161	1.0248	1.06994	0.96252	1.07154	1.00421	0.950849	0.986887	0.983931	1.0027	0.999	0.972583	1.0013	1.02143	0.979513	0.973653	1.00713	1.09188	1.00451	0.989753	1.02204	1.00501	1.05054	1.0321	0.944311	0.967055	1.02235	1.04112	0.998601	0.9859	1.01867	1.02829	1.00864	1.01491	0.997603
949	chr3	71081021	71607116	1.07229	1.03479	0.997503	1.01298	1.003	0.920719	0.963387	0.989951	0.960982	1.04991	1.01298	0.982161	1.0248	1.06994	0.96252	1.07154	1.00421	0.950849	0.986887	0.983931	1.0027	0.999	0.972583	1.0013	1.02143	0.979513	0.973653	1.00713	1.09188	1.00451	0.989753	1.02204	1.00501	1.05054	1.0321	0.944311	0.967055	1.02235	1.04112	0.998601	0.9859	1.01867	1.02829	1.00864	1.01491	0.997603
950	chr3	71607117	72146169	1.07229	1.03479	0.997503	1.01298	1.003	0.920719	0.963387	0.989951	0.960982	1.04991	1.01298	0.982161	1.0248	1.06994	0.96252	1.07154	1.00421	0.950849	0.986887	0.983931	1.0027	0.999	0.972583	1.0013	1.02143	0.979513	0.973653	1.00713	1.09188	1.00451	0.989753	1.02204	1.00501	1.05054	1.0321	0.944311	0.967055	1.02235	1.04112	0.998601	0.9859	1.01867	1.02829	1.00864	1.01491	0.997603
951	chr3	72146170	72665035	1.07229	1.03479	0.997503	1.01298	1.003	0.920719	0.963387	0.989951	0.960982	1.04991	1.01298	0.982161	1.0248	1.06994	0.96252	1.07154	1.00421	0.950849	0.986887	0.983931	1.0027	0.999	0.972583	1.0013	1.02143	0.979513	0.973653	1.00713	1.09188	1.00451	0.989753	1.02204	1.00501	1.05054	1.0321	0.944311	0.967055	1.02235	1.04112	0.998601	0.9859	1.01867	1.02829	1.00864	1.01491	0.997603
952	chr3	72665036	73240617	1.07229	1.03479	0.997503	1.01298	1.003	0.920719	0.963387	0.989951	0.960982	1.04991	1.01298	0.982161	1.0248	1.06994	0.96252	1.07154	1.00421	0.950849	0.986887	0.983931	1.0027	0.999	0.972583	1.0013	1.02143	0.979513	0.973653	1.00713	1.09188	1.00451	0.989753	1.02204	1.00501	1.05054	1.0321	0.944311	0.967055	1.02235	1.04112	0.998601	0.9859	1.01867	1.02829	1.00864	1.01491	0.997603
953	chr3	73240618	73789580	1.07229	1.03479	0.997503	1.01298	1.003	0.920719	0.963387	0.989951	0.960982	1.04991	1.01298	0.982161	1.0248	1.06994	0.96252	1.07154	1.00421	0.950849	0.986887	0.983931	1.0027	0.999	0.972583	1.0013	1.02143	0.979513	0.973653	1.00713	1.09188	1.00451	0.989753	1.02204	1.00501	1.05054	1.0321	0.944311	0.967055	1.02235	1.04112	0.998601	0.9859	1.01867	1.02829	1.00864	1.01491	0.997603
954	chr3	73789581	74350060	1.07229	1.03479	0.997503	1.01298	1.003	0.920719	0.963387	0.989951	0.960982	1.04991	1.01298	0.982161	1.0248	1.06994	0.96252	1.07154	1.00421	0.950849	0.986887	0.983931	1.0027	0.999	0.972583	1.0013	1.02143	0.979513	0.973653	1.00713	1.09188	1.00451	0.989753	1.02204	1.00501	1.05054	1.0321	0.944311	0.967055	1.02235	1.04112	0.998601	0.9859	1.01867	1.02829	1.00864	1.01491	0.997603
955	chr3	74350061	74905994	1.07229	1.03479	0.997503	1.01298	1.003	0.920719	0.963387	0.989951	0.960982	1.04991	1.01298	0.982161	1.0248	1.06994	0.96252	1.07154	1.00421	0.950849	0.986887	0.983931	1.0027	0.999	0.972583	1.0013	1.02143	0.979513	0.973653	1.00713	1.09188	1.00451	0.989753	1.02204	1.00501	1.05054	1.0321	0.944311	0.967055	1.02235	1.04112	0.998601	0.9859	1.01867	1.02829	1.00864	1.01491	0.997603
956	chr3	74905995	75508939	1.07229	1.03479	0.997503	1.01298	1.003	0.920719	0.963387	0.989951	0.960982	1.04991	1.01298	0.982161	1.0248	1.06994	0.96252	1.07154	1.00421	0.950849	0.986887	0.983931	1.0027	0.999	0.972583	1.0013	1.02143	0.979513	0.973653	1.00713	1.09188	1.00451	0.989753	1.02204	1.00501	1.05054	1.0321	0.944311	0.967055	1.02235	1.04112	0.998601	0.9859	1.01867	1.02829	1.00864	1.01491	0.997603
[truncated: 4,044 more rows]
[truncated: 35 more columns]
