# Supplementary material for: Copolymerization of single-cell nucleic acids into balls of acrylamide gel
Source: Genome Res. 2020 Jan;30(1):49–61. doi: 10.1101/gr.253047.119 (PMC6961581; doi:10.1101/gr.253047.119)
Supplement: Supplemental Material [file supp_gr.253047.119_Supplemental_Data_S5.xlsx]

## Sheet: README
Supplemental Data S5 - Normalized bin count data for DNA BAGs from sample nyu005_14
Column name	Description
bin.number	sequence number of bin in genome order
chrom	chromosome location of the bin
bin.start	chromosome position bin start coordinate in hg19
bin.end	chromosome position bin end coordinate in hg19
11-character string consisting of ACGT indicating the BAG barcode	the normalized bin count value

## Sheet: nyu005_14.5k.bins.seg
bin.number	chrom	bin.start	bin.end	AAACTGAATAT	AAACTGAGATC	AAACTGCATCC	AAACTGGTTCT	AAAGGGAGAGA	AACCTCGCAGT	AACGTAAGTAC	AACGTAATAGT	AACTTGTGAAC	AACTTGTTACC	AAGGTTCTACT	AAGTCAAGTAC	AAGTCAGAATC	AAGTCAGGTCA	AATCGAAATTG	AGAAGGACTGA	AGAAGGCATAA	AGAAGGCGTAG	AGAGCAGGTTG	AGAGTCTTATT	AGCAACACTCT	AGCAACCGACA	AGCAACCTAGA	AGCAACGAATC	AGCAACTGTCC	AGCAGTCGTTC	AGCAGTCTTGT	AGCTAGCAAGT	AGCTAGTGTCC	AGGTACATATA	AGGTTTAGAGA	AGGTTTGAAGA	AGTACACTTAC	AGTACATATTC	AGTACATGTAA	AGTATTGATAC	AGTGTGCTTAC	AGTGTGTCAGA	AGTTCGCTACT	AGTTCGGTTCT	AGTTCGTGTGG	ATAACGCAAGT	ATAACGTATTC	ATAGTTATTCC	ATAGTTCTACT	ATATAGGAACT
1	chr1	1	428275	1.0003	1.03842	1.02388	1.0027	1.01319	1.02737	1.00652	1.0539	1.10241	1.05475	1.04739	1.00672	0.996207	1.00511	1.04687	1.03241	1.00965	1.04812	0.99372	1.02327	1.02624	0.983931	1.014	1.00471	1.02624	0.997104	1.03221	1.02194	0.984029	1.20334	1.01603	0.60951	0.994217	0.985408	0.982652	1.00823	1.02501	1.40074	1.0031	1.0009	0.986788	1.0144	0.993819	1.02173	1.00692	1.0031
2	chr1	428276	620697	1.0003	1.03842	1.02388	1.0027	1.01319	1.02737	1.00652	1.0539	1.10241	1.05475	1.04739	1.00672	0.996207	1.00511	1.04687	1.03241	1.00965	1.04812	0.99372	1.02327	1.02624	0.983931	1.014	1.00471	1.02624	0.997104	1.03221	1.02194	0.984029	1.20334	1.01603	0.60951	0.994217	0.985408	0.982652	1.00823	1.02501	1.40074	1.0031	1.0009	0.986788	1.0144	0.993819	1.02173	1.00692	1.0031
3	chr1	620698	1122128	1.0003	1.03842	1.02388	1.0027	1.01319	1.02737	1.00652	1.0539	1.10241	1.05475	1.04739	1.00672	0.996207	1.00511	1.04687	1.03241	1.00965	1.04812	0.99372	1.02327	1.02624	0.983931	1.014	1.00471	1.02624	0.997104	1.03221	1.02194	0.984029	1.20334	1.01603	0.60951	0.994217	0.985408	0.982652	1.00823	1.02501	1.40074	1.0031	1.0009	0.986788	1.0144	0.993819	1.02173	1.00692	1.0031
4	chr1	1122129	1779256	1.0003	1.03842	1.02388	1.0027	1.01319	1.02737	1.00652	1.0539	1.10241	1.05475	1.04739	1.00672	0.996207	1.00511	1.04687	1.03241	1.00965	1.04812	0.99372	1.02327	1.02624	0.983931	1.014	1.00471	1.02624	0.997104	1.03221	1.02194	0.984029	1.20334	1.01603	0.60951	0.994217	0.985408	0.982652	1.00823	1.02501	1.40074	1.0031	1.0009	0.986788	1.0144	0.993819	1.02173	1.00692	1.0031
5	chr1	1779257	2357606	1.0003	1.03842	1.02388	1.0027	1.01319	1.02737	1.00652	1.0539	1.10241	1.05475	1.04739	1.00672	0.996207	1.00511	1.04687	1.03241	1.00965	1.04812	0.99372	1.02327	1.02624	0.983931	1.014	1.00471	1.02624	0.997104	1.03221	1.02194	0.984029	1.20334	1.01603	1.0028	0.994217	0.985408	0.982652	1.00823	1.02501	0.968797	1.0031	1.0009	0.986788	1.0144	0.993819	1.02173	1.00692	1.0031
6	chr1	2357607	2964887	1.0003	1.03842	1.02388	1.0027	1.01319	1.02737	1.00652	1.0539	1.10241	1.05475	1.04739	1.00672	0.996207	1.00511	1.04687	1.03241	1.00965	1.04812	0.99372	1.02327	1.02624	0.983931	1.014	1.00471	1.02624	0.997104	1.03221	1.02194	0.984029	1.20334	1.01603	1.0028	0.994217	0.985408	0.982652	1.00823	1.02501	0.968797	1.0031	1.0009	0.986788	1.0144	0.993819	1.02173	1.00692	1.0031
7	chr1	2964888	3470030	1.0003	1.03842	1.02388	1.0027	1.01319	1.02737	1.00652	1.0539	1.10241	1.05475	1.04739	1.00672	0.996207	1.00511	1.04687	1.03241	1.00965	1.04812	0.99372	1.02327	1.02624	0.983931	1.014	1.00471	1.02624	0.997104	1.03221	1.02194	0.984029	1.20334	1.01603	1.0028	0.994217	0.985408	0.982652	1.00823	1.02501	0.968797	1.0031	1.0009	0.986788	1.0144	0.993819	1.02173	1.00692	1.0031
8	chr1	3470031	4193611	1.0003	1.03842	1.02388	1.0027	1.01319	1.02737	1.00652	1.0539	1.10241	1.05475	1.04739	1.00672	0.996207	1.00511	1.04687	1.03241	1.00965	1.04812	0.99372	1.02327	1.02624	0.983931	1.014	1.00471	1.02624	0.997104	1.03221	1.02194	0.984029	1.20334	1.01603	1.0028	0.994217	0.985408	0.982652	1.00823	1.02501	0.968797	1.0031	1.0009	0.986788	1.0144	0.993819	1.02173	1.00692	1.0031
9	chr1	4193612	4734431	1.0003	1.03842	1.02388	1.0027	1.01319	1.02737	1.00652	1.0539	1.10241	1.05475	1.04739	1.00672	0.996207	1.00511	1.04687	1.03241	1.00965	1.04812	0.99372	1.02327	1.02624	0.983931	1.014	1.00471	1.02624	0.997104	1.03221	1.02194	0.984029	1.20334	1.01603	1.0028	0.994217	0.985408	0.982652	1.00823	1.02501	0.968797	1.0031	1.0009	0.986788	1.0144	0.993819	1.02173	1.00692	1.0031
10	chr1	4734432	5296313	1.0003	1.03842	1.02388	1.0027	1.01319	1.02737	1.00652	1.0539	1.10241	1.05475	1.04739	1.00672	0.996207	1.00511	1.04687	1.03241	1.00965	1.04812	0.99372	1.02327	1.02624	0.983931	1.014	1.00471	1.02624	0.997104	1.03221	1.02194	0.984029	1.20334	1.01603	1.0028	0.994217	0.985408	0.982652	1.00823	1.02501	0.968797	1.0031	1.0009	0.986788	1.0144	0.993819	1.02173	1.00692	1.0031
11	chr1	5296314	5845062	1.0003	1.03842	1.02388	1.0027	1.01319	1.02737	1.00652	1.0539	1.10241	1.05475	1.04739	1.00672	0.996207	1.00511	1.04687	1.03241	1.00965	1.04812	0.99372	1.02327	1.02624	0.983931	1.014	1.00471	1.02624	0.997104	1.03221	1.02194	0.984029	1.20334	1.01603	1.0028	0.994217	0.985408	0.982652	1.00823	1.02501	0.968797	1.0031	1.0009	0.986788	1.0144	0.993819	1.02173	1.00692	1.0031
12	chr1	5845063	6382868	1.0003	1.03842	1.02388	1.0027	1.01319	1.02737	1.00652	1.0539	1.10241	1.05475	1.04739	1.00672	0.996207	1.00511	1.04687	1.03241	1.00965	1.04812	0.99372	1.02327	1.02624	0.983931	1.014	1.00471	1.02624	0.997104	1.03221	1.02194	0.984029	1.20334	1.01603	1.0028	0.994217	0.985408	0.982652	1.00823	1.02501	0.968797	1.0031	1.0009	0.986788	1.0144	0.993819	1.02173	1.00692	1.0031
13	chr1	6382869	6962366	1.0003	1.03842	1.02388	1.0027	1.01319	1.02737	1.00652	1.0539	1.10241	1.05475	1.04739	1.00672	0.996207	1.00511	1.04687	1.03241	1.00965	1.04812	0.99372	1.02327	1.02624	0.983931	1.014	1.00471	1.02624	0.997104	1.03221	1.02194	0.984029	1.20334	1.01603	1.0028	0.994217	0.985408	0.982652	1.00823	1.02501	0.968797	1.0031	1.0009	0.986788	1.0144	0.993819	1.02173	1.00692	1.0031
14	chr1	6962367	7468721	1.0003	1.03842	1.02388	1.0027	1.01319	1.02737	1.00652	1.0539	1.10241	1.05475	1.04739	1.00672	0.996207	1.00511	1.04687	1.03241	1.00965	1.04812	0.99372	1.02327	1.02624	0.983931	1.014	1.00471	1.02624	0.997104	1.03221	1.02194	0.984029	1.20334	1.01603	1.0028	0.994217	0.985408	0.982652	1.00823	1.02501	0.968797	1.0031	1.0009	0.986788	1.0144	0.993819	1.02173	1.00692	1.0031
15	chr1	7468722	7999687	1.0003	1.03842	1.02388	1.0027	1.01319	1.02737	1.00652	1.0539	1.10241	1.05475	1.04739	1.00672	0.996207	1.00511	1.04687	1.03241	1.00965	1.04812	0.99372	1.02327	1.02624	0.983931	1.014	1.00471	1.02624	0.997104	1.03221	1.02194	0.984029	1.20334	1.01603	1.0028	0.994217	0.985408	0.982652	1.00823	1.02501	0.968797	1.0031	1.0009	0.986788	1.0144	0.993819	1.02173	1.00692	1.0031
16	chr1	7999688	8554982	1.0003	1.03842	1.02388	1.0027	1.01319	1.02737	1.00652	1.0539	1.10241	1.05475	1.04739	1.00672	0.996207	1.00511	1.04687	1.03241	1.00965	1.04812	0.99372	1.02327	1.02624	0.983931	1.014	1.00471	1.02624	0.997104	1.03221	1.02194	0.984029	1.20334	1.01603	1.0028	0.994217	0.985408	0.982652	1.00823	1.02501	0.968797	1.0031	1.0009	0.986788	1.0144	0.993819	1.02173	1.00692	1.0031
17	chr1	8554983	9133954	1.0003	1.03842	1.02388	1.0027	1.01319	1.02737	1.00652	1.0539	1.10241	1.05475	1.04739	1.00672	0.996207	1.00511	1.04687	1.03241	1.00965	1.04812	0.99372	1.02327	1.02624	0.983931	1.014	1.00471	1.02624	0.997104	1.03221	1.02194	0.984029	1.20334	1.01603	1.0028	0.994217	0.985408	0.982652	1.00823	1.02501	0.968797	1.0031	1.0009	0.986788	1.0144	0.993819	1.02173	1.00692	1.0031
18	chr1	9133955	9673433	1.0003	1.03842	1.02388	1.0027	1.01319	1.02737	1.00652	1.0539	1.10241	1.05475	1.04739	1.00672	0.996207	1.00511	1.04687	1.03241	1.00965	1.04812	0.99372	1.02327	1.02624	0.983931	1.014	1.00471	1.02624	0.997104	1.03221	1.02194	0.984029	1.20334	1.01603	1.0028	0.994217	0.985408	0.982652	1.00823	1.02501	0.968797	1.0031	1.0009	0.986788	1.0144	0.993819	1.02173	1.00692	1.0031
19	chr1	9673434	10246190	1.0003	1.03842	1.02388	1.0027	1.01319	1.02737	1.00652	1.0539	1.10241	1.05475	1.04739	1.00672	0.996207	1.00511	1.04687	1.03241	1.00965	1.04812	0.99372	1.02327	1.02624	0.983931	1.014	1.00471	1.02624	0.997104	1.03221	1.02194	0.984029	1.20334	1.01603	1.0028	0.994217	0.985408	0.982652	1.00823	1.02501	0.968797	1.0031	1.0009	0.986788	1.0144	0.993819	1.02173	1.00692	1.0031
20	chr1	10246191	10793949	1.0003	1.03842	1.02388	1.0027	1.01319	1.02737	1.00652	1.0539	1.10241	1.05475	1.04739	1.00672	0.996207	1.00511	1.04687	1.03241	1.00965	1.04812	0.99372	1.02327	1.02624	0.983931	1.014	1.00471	1.02624	0.997104	1.03221	1.02194	0.984029	1.20334	1.01603	1.0028	0.994217	0.985408	0.982652	1.00823	1.02501	0.968797	1.0031	1.0009	0.986788	1.0144	0.993819	1.02173	1.00692	1.0031
21	chr1	10793950	11339541	1.0003	1.03842	1.02388	1.0027	1.01319	1.02737	1.00652	1.0539	1.10241	1.05475	1.04739	1.00672	0.996207	1.00511	1.04687	1.03241	1.00965	1.04812	0.99372	1.02327	1.02624	0.983931	1.014	1.00471	1.02624	0.997104	1.03221	1.02194	0.984029	1.20334	1.01603	1.0028	0.994217	0.985408	0.982652	1.00823	1.02501	0.968797	1.0031	1.0009	0.986788	1.0144	0.993819	1.02173	1.00692	1.0031
22	chr1	11339542	11889564	1.0003	1.03842	1.02388	1.0027	1.01319	1.02737	1.00652	1.0539	1.10241	1.05475	1.04739	1.00672	0.996207	1.00511	1.04687	1.03241	1.00965	1.04812	0.99372	1.02327	1.02624	0.983931	1.014	1.00471	1.02624	0.997104	1.03221	1.02194	0.984029	1.20334	1.01603	1.0028	0.994217	0.985408	0.982652	1.00823	1.02501	0.968797	1.0031	1.0009	0.986788	1.0144	0.993819	1.02173	1.00692	1.0031
23	chr1	11889565	12416188	1.0003	1.03842	1.02388	1.0027	1.01319	1.02737	1.00652	1.0539	1.10241	1.05475	1.04739	1.00672	0.996207	1.00511	1.04687	1.03241	1.00965	1.04812	0.99372	1.02327	1.02624	0.983931	1.014	1.00471	1.02624	0.997104	1.03221	1.02194	0.984029	1.20334	1.01603	1.0028	0.994217	0.985408	0.982652	1.00823	1.02501	0.968797	1.0031	1.0009	0.986788	1.0144	0.993819	1.02173	1.00692	1.0031
24	chr1	12416189	12936486	1.0003	1.03842	1.02388	1.0027	1.01319	1.02737	1.00652	1.0539	1.10241	1.05475	1.04739	1.00672	0.996207	1.00511	1.04687	1.03241	1.00965	1.04812	0.99372	1.02327	1.02624	0.983931	1.014	1.00471	1.02624	0.997104	1.03221	1.02194	0.984029	1.20334	1.01603	1.0028	0.994217	0.985408	0.982652	1.00823	1.02501	0.968797	1.0031	1.0009	0.986788	1.0144	0.993819	1.02173	1.00692	1.0031
25	chr1	12936487	13636282	1.0003	1.03842	1.02388	1.0027	1.01319	1.02737	1.00652	1.0539	1.10241	1.05475	1.04739	1.00672	0.996207	1.00511	1.04687	1.03241	1.00965	1.04812	0.99372	1.02327	1.02624	0.983931	1.014	1.00471	1.02624	0.997104	1.03221	1.02194	0.984029	1.20334	1.01603	1.0028	0.994217	0.985408	0.982652	1.00823	1.02501	0.968797	1.0031	1.0009	0.986788	1.0144	0.993819	1.02173	1.00692	1.0031
26	chr1	13636283	14233689	1.0003	1.03842	1.02388	1.0027	1.01319	1.02737	1.00652	1.0539	1.10241	1.05475	1.04739	1.00672	0.996207	1.00511	1.04687	1.03241	1.00965	1.04812	0.99372	1.02327	1.02624	0.983931	1.014	1.00471	1.02624	0.997104	1.03221	1.02194	0.984029	1.20334	1.01603	1.0028	0.994217	0.985408	0.982652	1.00823	1.02501	0.968797	1.0031	1.0009	0.986788	1.0144	0.993819	1.02173	1.00692	1.0031
27	chr1	14233690	14779206	1.0003	1.03842	1.02388	1.0027	1.01319	1.02737	1.00652	1.0539	1.10241	1.05475	1.04739	1.00672	0.996207	1.00511	1.04687	1.03241	1.00965	1.04812	0.99372	1.02327	1.02624	0.983931	1.014	1.00471	1.02624	0.997104	1.03221	1.02194	0.984029	1.20334	1.01603	1.0028	0.994217	0.985408	0.982652	1.00823	1.02501	0.968797	1.0031	1.0009	0.986788	1.0144	0.993819	1.02173	1.00692	1.0031
28	chr1	14779207	15303889	1.0003	1.03842	1.02388	1.0027	1.01319	1.02737	1.00652	1.0539	1.10241	1.05475	1.04739	1.00672	0.996207	1.00511	1.04687	1.03241	1.00965	1.04812	0.99372	1.02327	1.02624	0.983931	1.014	1.00471	1.02624	0.997104	1.03221	1.02194	0.984029	1.20334	1.01603	1.0028	0.994217	0.985408	0.982652	1.00823	1.02501	0.968797	1.0031	1.0009	0.986788	1.0144	0.993819	1.02173	1.00692	1.0031
29	chr1	15303890	15826550	1.0003	1.03842	1.02388	1.0027	1.01319	1.02737	1.00652	1.0539	1.10241	1.05475	1.04739	1.00672	0.996207	1.00511	1.04687	1.03241	1.00965	1.04812	0.99372	1.02327	1.02624	0.983931	1.014	1.00471	1.02624	0.997104	1.03221	1.02194	0.984029	1.20334	1.01603	1.0028	0.994217	0.985408	0.982652	1.00823	1.02501	0.968797	1.0031	1.0009	0.986788	1.0144	0.993819	1.02173	1.00692	1.0031
30	chr1	15826551	16392039	1.0003	1.03842	1.02388	1.0027	1.01319	1.02737	1.00652	1.0539	1.10241	1.05475	1.04739	1.00672	0.996207	1.00511	1.04687	1.03241	1.00965	1.04812	0.99372	1.02327	1.02624	0.983931	1.014	1.00471	1.02624	0.997104	1.03221	1.02194	0.984029	1.20334	1.01603	1.0028	0.994217	0.985408	0.982652	1.00823	1.02501	0.968797	1.0031	1.0009	0.986788	1.0144	0.993819	1.02173	1.00692	1.0031
31	chr1	16392040	16891016	1.0003	1.03842	1.02388	1.0027	1.01319	1.02737	1.00652	1.0539	1.10241	1.05475	1.04739	1.00672	0.996207	1.00511	1.04687	1.03241	1.00965	1.04812	0.99372	1.02327	1.02624	0.983931	1.014	1.00471	1.02624	0.997104	1.03221	1.02194	0.984029	1.20334	1.01603	1.0028	0.994217	0.985408	0.982652	1.00823	1.02501	0.968797	1.0031	1.0009	0.986788	1.0144	0.993819	1.02173	1.00692	1.0031
32	chr1	16891017	17095187	1.0003	1.03842	1.02388	1.0027	1.01319	1.02737	1.00652	1.0539	1.10241	1.05475	1.04739	1.00672	0.996207	1.00511	1.04687	1.03241	1.00965	1.04812	0.99372	1.02327	1.02624	0.983931	1.014	1.00471	1.02624	0.997104	1.03221	1.02194	0.984029	1.20334	1.01603	1.0028	0.994217	0.985408	0.982652	1.00823	1.02501	0.968797	1.0031	1.0009	0.986788	1.0144	0.993819	1.02173	1.00692	1.0031
33	chr1	17095188	17565229	1.0003	1.03842	1.02388	1.0027	1.01319	1.02737	1.00652	1.0539	1.10241	1.05475	1.04739	1.00672	0.996207	1.00511	1.04687	1.03241	1.00965	1.04812	0.99372	1.02327	1.02624	0.983931	1.014	1.00471	1.02624	0.997104	1.03221	1.02194	0.984029	1.20334	1.01603	1.0028	0.994217	0.985408	0.982652	1.00823	1.02501	0.968797	1.0031	1.0009	0.986788	1.0144	0.993819	1.02173	1.00692	1.0031
34	chr1	17565230	18083485	1.0003	1.03842	1.02388	1.0027	1.01319	1.02737	1.00652	1.0539	1.10241	1.05475	1.04739	1.00672	0.996207	1.00511	1.04687	1.03241	1.00965	1.04812	0.99372	1.02327	1.02624	0.983931	1.014	1.00471	1.02624	0.997104	1.03221	1.02194	0.984029	1.20334	1.01603	1.0028	0.994217	0.985408	0.982652	1.00823	1.02501	0.968797	1.0031	1.0009	0.986788	1.0144	0.993819	1.02173	1.00692	1.0031
35	chr1	18083486	18587701	1.0003	1.03842	1.02388	1.0027	1.01319	1.02737	1.00652	1.0539	1.10241	1.05475	1.04739	1.00672	0.996207	1.00511	1.04687	1.03241	1.00965	1.04812	0.99372	1.02327	1.02624	0.983931	1.014	1.00471	1.02624	0.997104	1.03221	1.02194	0.984029	1.20334	1.01603	1.0028	0.994217	0.985408	0.982652	1.00823	1.02501	0.968797	1.0031	1.0009	0.986788	1.0144	0.993819	1.02173	1.00692	1.0031
36	chr1	18587702	19113519	1.0003	1.03842	1.02388	1.0027	1.01319	1.02737	1.00652	1.0539	1.10241	1.05475	1.04739	1.00672	0.996207	1.00511	1.04687	1.03241	1.00965	1.04812	0.99372	1.02327	1.02624	0.983931	1.014	1.00471	1.02624	0.997104	1.03221	1.02194	0.984029	1.20334	1.01603	1.0028	0.994217	0.985408	0.982652	1.00823	1.02501	0.968797	1.0031	1.0009	0.986788	1.0144	0.993819	1.02173	1.00692	1.0031
37	chr1	19113520	19594848	1.0003	1.03842	1.02388	1.0027	1.01319	1.02737	1.00652	1.0539	1.10241	1.05475	1.04739	1.00672	0.996207	1.00511	1.04687	1.03241	1.00965	1.04812	0.99372	1.02327	1.02624	0.983931	1.014	1.00471	1.02624	0.997104	1.03221	1.02194	0.984029	1.20334	1.01603	1.0028	0.994217	0.985408	0.982652	1.00823	1.02501	0.968797	1.0031	1.0009	0.986788	1.0144	0.993819	1.02173	1.00692	1.0031
38	chr1	19594849	20112230	1.0003	1.03842	1.02388	1.0027	1.01319	1.02737	1.00652	1.0539	1.10241	1.05475	1.04739	1.00672	0.996207	1.00511	1.04687	1.03241	1.00965	1.04812	0.99372	1.02327	1.02624	0.983931	1.014	1.00471	1.02624	0.997104	1.03221	1.02194	0.984029	1.20334	1.01603	1.0028	0.994217	0.985408	0.982652	1.00823	1.02501	0.968797	1.0031	1.0009	0.986788	1.0144	0.993819	1.02173	1.00692	1.0031
39	chr1	20112231	20626778	1.0003	1.03842	1.02388	1.0027	1.01319	1.02737	1.00652	1.0539	1.10241	1.05475	1.04739	1.00672	0.996207	1.00511	1.04687	1.03241	1.00965	1.04812	0.99372	1.02327	1.02624	0.983931	1.014	1.00471	1.02624	0.997104	1.03221	1.02194	0.984029	1.20334	1.01603	1.0028	0.994217	0.985408	0.982652	1.00823	1.02501	0.968797	1.0031	1.0009	0.986788	1.0144	0.993819	1.02173	1.00692	1.0031
40	chr1	20626779	21153878	1.0003	1.03842	1.02388	1.0027	1.01319	1.02737	1.00652	1.0539	1.10241	1.05475	1.04739	1.00672	0.996207	1.00511	1.04687	1.03241	1.00965	1.04812	0.99372	1.02327	1.02624	0.983931	1.014	1.00471	1.02624	0.997104	1.03221	1.02194	0.984029	1.20334	1.01603	1.0028	0.994217	0.985408	0.982652	1.00823	1.02501	0.968797	1.0031	1.0009	0.986788	1.0144	0.993819	1.02173	1.00692	1.0031
41	chr1	21153879	21724878	1.0003	1.03842	1.02388	1.0027	1.01319	1.02737	1.00652	1.0539	1.10241	1.05475	1.04739	1.00672	0.996207	1.00511	1.04687	1.03241	1.00965	1.04812	0.99372	1.02327	1.02624	0.983931	1.014	1.00471	1.02624	0.997104	1.03221	1.02194	0.984029	1.20334	1.01603	1.0028	0.994217	0.985408	0.982652	1.00823	1.02501	0.968797	1.0031	1.0009	0.986788	1.0144	0.993819	1.02173	1.00692	1.0031
42	chr1	21724879	22253016	1.0003	1.03842	1.02388	1.0027	1.01319	1.02737	1.00652	1.0539	1.10241	1.05475	1.04739	1.00672	0.996207	1.00511	1.04687	1.03241	1.00965	1.04812	0.99372	1.02327	1.02624	0.983931	1.014	1.00471	1.02624	0.997104	1.03221	1.02194	0.984029	1.20334	1.01603	1.0028	0.994217	0.985408	0.982652	1.00823	1.02501	0.968797	1.0031	1.0009	0.986788	1.0144	0.993819	1.02173	1.00692	1.0031
43	chr1	22253017	22782741	1.0003	1.03842	1.02388	1.0027	1.01319	1.02737	1.00652	1.0539	1.10241	1.05475	1.04739	1.00672	0.996207	1.00511	1.04687	1.03241	1.00965	1.04812	0.99372	1.02327	1.02624	0.983931	1.014	1.00471	1.02624	0.997104	1.03221	1.02194	0.984029	1.20334	1.01603	1.0028	0.994217	0.985408	0.982652	1.00823	1.02501	0.968797	1.0031	1.0009	0.986788	1.0144	0.993819	1.02173	1.00692	1.0031
44	chr1	22782742	23305764	1.0003	1.03842	1.02388	1.0027	1.01319	1.02737	1.00652	1.0539	1.10241	1.05475	1.04739	1.00672	0.996207	1.00511	1.04687	1.03241	1.00965	1.04812	0.99372	1.02327	1.02624	0.983931	1.014	1.00471	1.02624	0.997104	1.03221	1.02194	0.984029	1.20334	1.01603	1.0028	0.994217	0.985408	0.982652	1.00823	1.02501	0.968797	1.0031	1.0009	0.986788	1.0144	0.993819	1.02173	1.00692	1.0031
45	chr1	23305765	23866999	1.0003	1.03842	1.02388	1.0027	1.01319	1.02737	1.00652	1.0539	1.10241	1.05475	1.04739	1.00672	0.996207	1.00511	1.04687	1.03241	1.00965	1.04812	0.99372	1.02327	1.02624	0.983931	1.014	1.00471	1.02624	0.997104	1.03221	1.02194	0.984029	1.20334	1.01603	1.0028	0.994217	0.985408	0.982652	1.00823	1.02501	0.968797	1.0031	1.0009	0.986788	1.0144	0.993819	1.02173	1.00692	1.0031
46	chr1	23867000	24468012	1.0003	1.03842	1.02388	1.0027	1.01319	1.02737	1.00652	1.0539	1.10241	1.05475	1.04739	1.00672	0.996207	1.00511	1.04687	1.03241	1.00965	1.04812	0.99372	1.02327	1.02624	0.983931	1.014	1.00471	1.02624	0.997104	1.03221	1.02194	0.984029	1.20334	1.01603	1.0028	0.994217	0.985408	0.982652	1.00823	1.02501	0.968797	1.0031	1.0009	0.986788	1.0144	0.993819	1.02173	1.00692	1.0031
47	chr1	24468013	24984290	1.0003	1.03842	1.02388	1.0027	1.01319	1.02737	1.00652	1.0539	1.10241	1.05475	1.04739	1.00672	0.996207	1.00511	1.04687	1.03241	1.00965	1.04812	0.99372	1.02327	1.02624	0.983931	1.014	1.00471	1.02624	0.997104	1.03221	1.02194	0.984029	1.20334	1.01603	1.0028	0.994217	0.985408	0.982652	1.00823	1.02501	0.968797	1.0031	1.0009	0.986788	1.0144	0.993819	1.02173	1.00692	1.0031
48	chr1	24984291	25535135	1.0003	1.03842	1.02388	1.0027	1.01319	1.02737	1.00652	1.0539	1.10241	1.05475	1.04739	1.00672	0.996207	1.00511	1.04687	1.03241	1.00965	1.04812	0.99372	1.02327	1.02624	0.983931	1.014	1.00471	1.02624	0.997104	1.03221	1.02194	0.984029	1.20334	1.01603	1.0028	0.994217	0.985408	0.982652	1.00823	1.02501	0.968797	1.0031	1.0009	0.986788	1.0144	0.993819	1.02173	1.00692	1.0031
49	chr1	25535136	26072297	1.0003	1.03842	1.02388	1.0027	1.01319	1.02737	1.00652	1.0539	1.10241	1.05475	1.04739	1.00672	0.996207	1.00511	1.04687	1.03241	1.00965	1.04812	0.99372	1.02327	1.02624	0.983931	1.014	1.00471	1.02624	0.997104	1.03221	1.02194	0.984029	1.20334	1.01603	1.0028	0.994217	0.985408	0.982652	1.00823	1.02501	0.968797	1.0031	1.0009	0.986788	1.0144	0.993819	1.02173	1.00692	1.0031
50	chr1	26072298	26616722	1.0003	1.03842	1.02388	1.0027	1.01319	1.02737	1.00652	1.0539	1.10241	1.05475	1.04739	1.00672	0.996207	1.00511	1.04687	1.03241	1.00965	1.04812	0.99372	1.02327	1.02624	0.983931	1.014	1.00471	1.02624	0.997104	1.03221	1.02194	0.984029	1.20334	1.01603	1.0028	0.994217	0.985408	0.982652	1.00823	1.02501	1.43118	1.0031	1.0009	0.986788	1.0144	0.993819	1.02173	1.00692	1.0031
51	chr1	26616723	27190656	1.0003	1.03842	1.02388	1.0027	1.01319	1.02737	1.00652	1.0539	1.10241	1.05475	1.04739	1.00672	0.996207	1.00511	1.04687	1.03241	1.00965	1.04812	0.99372	1.02327	1.02624	0.983931	1.014	1.00471	1.02624	0.997104	1.03221	1.02194	0.984029	1.20334	1.01603	1.0028	0.994217	0.985408	0.982652	1.00823	1.02501	1.43118	1.0031	1.0009	0.986788	1.0144	0.993819	1.02173	1.00692	1.0031
52	chr1	27190657	27754800	1.0003	1.03842	1.02388	1.0027	1.01319	1.02737	1.00652	1.0539	1.10241	1.05475	1.04739	1.00672	0.996207	1.00511	1.04687	1.03241	1.00965	1.04812	0.99372	1.02327	1.02624	0.983931	1.014	1.00471	1.02624	0.997104	1.03221	1.02194	0.984029	1.20334	1.01603	1.0028	0.994217	0.985408	0.982652	1.00823	1.02501	1.43118	1.0031	1.0009	0.986788	1.0144	0.993819	1.02173	1.00692	1.0031
53	chr1	27754801	28337819	1.0003	1.03842	1.02388	1.0027	1.01319	1.02737	1.00652	1.0539	1.10241	1.05475	1.04739	1.00672	0.996207	1.00511	1.04687	1.03241	1.00965	1.04812	0.99372	1.02327	1.02624	0.983931	1.014	1.00471	1.02624	0.997104	1.03221	1.02194	0.984029	1.20334	1.01603	1.0028	0.994217	0.985408	0.982652	1.00823	1.02501	1.43118	1.0031	1.0009	0.986788	1.0144	0.993819	1.02173	1.00692	1.0031
54	chr1	28337820	28925275	1.0003	1.03842	1.02388	1.0027	1.01319	1.02737	1.00652	1.0539	1.10241	1.05475	1.04739	1.00672	0.996207	1.00511	1.04687	1.03241	1.00965	1.04812	0.99372	1.02327	1.02624	0.983931	1.014	1.00471	1.02624	0.997104	1.03221	1.02194	0.984029	1.20334	1.01603	1.0028	0.994217	0.985408	0.982652	1.00823	1.02501	1.43118	1.0031	1.0009	0.986788	1.0144	0.993819	1.02173	1.00692	1.0031
55	chr1	28925276	29525195	1.0003	1.03842	1.02388	1.0027	1.01319	1.02737	1.00652	1.0539	1.10241	1.05475	1.04739	1.00672	0.996207	1.00511	1.04687	1.03241	1.00965	1.04812	0.99372	1.02327	1.02624	0.983931	1.014	1.00471	1.02624	0.997104	1.03221	1.02194	0.984029	1.20334	1.01603	1.0028	0.994217	0.985408	0.982652	1.00823	1.02501	1.43118	1.0031	1.0009	0.986788	1.0144	0.993819	1.02173	1.00692	1.0031
56	chr1	29525196	30186066	1.0003	1.03842	1.02388	1.0027	1.01319	1.02737	1.00652	1.0539	1.10241	1.05475	1.04739	1.00672	0.996207	1.00511	1.04687	1.03241	1.00965	1.04812	0.99372	1.02327	1.02624	0.983931	1.014	1.00471	1.02624	0.997104	1.03221	1.02194	0.984029	1.20334	1.01603	1.0028	0.994217	0.985408	0.982652	1.00823	1.02501	1.43118	1.0031	1.0009	0.986788	1.0144	0.993819	1.02173	1.00692	1.0031
57	chr1	30186067	30712617	1.0003	1.03842	1.02388	1.0027	1.01319	1.02737	1.00652	1.0539	1.10241	1.05475	1.04739	1.00672	0.996207	1.00511	1.04687	1.03241	1.00965	1.04812	0.99372	1.02327	1.02624	0.983931	1.014	1.00471	1.02624	0.997104	1.03221	1.02194	0.984029	1.20334	1.01603	1.0028	0.994217	0.985408	0.982652	1.00823	1.02501	1.43118	1.0031	1.0009	0.986788	1.0144	0.993819	1.02173	1.00692	1.0031
58	chr1	30712618	31230675	1.0003	1.03842	1.02388	1.0027	1.01319	1.02737	1.00652	1.0539	1.10241	1.05475	1.04739	1.00672	0.996207	1.00511	1.04687	1.03241	1.00965	1.04812	0.99372	1.02327	1.02624	0.983931	1.014	1.00471	1.02624	0.997104	1.03221	1.02194	0.984029	1.20334	1.01603	1.0028	0.994217	0.985408	0.982652	1.00823	1.02501	1.43118	1.0031	1.0009	0.986788	1.0144	0.993819	1.02173	1.00692	1.0031
59	chr1	31230676	31776539	1.0003	1.03842	1.02388	1.0027	1.01319	1.02737	1.00652	1.0539	1.10241	1.05475	1.04739	1.00672	0.996207	1.00511	1.04687	1.03241	1.00965	1.04812	0.99372	1.02327	1.02624	0.983931	1.014	1.00471	1.02624	0.997104	1.03221	1.02194	0.984029	1.20334	1.01603	1.0028	0.994217	0.985408	0.982652	1.00823	1.02501	1.43118	1.0031	1.0009	0.986788	1.0144	0.993819	1.02173	1.00692	1.0031
60	chr1	31776540	32278682	1.0003	1.03842	1.02388	1.0027	1.01319	1.02737	1.00652	1.0539	1.10241	1.05475	1.04739	1.00672	0.996207	1.00511	1.04687	1.03241	1.00965	1.04812	0.99372	1.02327	1.02624	0.983931	1.014	1.00471	1.02624	0.997104	1.03221	1.02194	0.984029	1.20334	1.01603	1.0028	0.994217	0.985408	0.982652	1.00823	1.02501	1.43118	1.0031	1.0009	0.986788	1.0144	0.993819	1.02173	1.00692	1.0031
61	chr1	32278683	32824485	1.0003	1.03842	1.02388	1.0027	1.01319	1.02737	1.00652	1.0539	1.10241	1.05475	1.04739	1.00672	0.996207	1.00511	1.04687	1.03241	1.00965	1.04812	0.99372	1.02327	1.02624	0.983931	1.014	1.00471	1.02624	0.997104	1.03221	1.02194	0.984029	1.20334	1.01603	1.0028	0.994217	0.985408	0.982652	1.00823	1.02501	0.688734	1.0031	1.0009	0.986788	1.0144	0.993819	1.02173	1.00692	1.0031
62	chr1	32824486	33411502	1.0003	1.03842	1.02388	1.0027	1.01319	1.02737	1.00652	1.0539	1.10241	1.05475	1.04739	1.00672	0.996207	1.00511	1.04687	1.03241	1.00965	1.04812	0.99372	1.02327	1.02624	0.983931	1.014	1.00471	1.02624	0.997104	1.03221	1.02194	0.984029	1.20334	1.01603	1.0028	0.994217	0.985408	0.982652	1.00823	1.02501	0.688734	1.0031	1.0009	0.986788	1.0144	0.993819	1.02173	1.00692	1.0031
63	chr1	33411503	33958687	1.0003	1.03842	1.02388	1.0027	1.01319	1.02737	1.00652	1.0539	1.10241	1.05475	1.04739	1.00672	0.996207	1.00511	1.04687	1.03241	1.00965	1.04812	0.99372	1.02327	1.02624	0.983931	1.014	1.00471	1.02624	0.997104	1.03221	1.02194	0.984029	1.20334	1.01603	1.0028	0.994217	0.985408	0.982652	1.00823	1.02501	0.688734	1.0031	1.0009	0.986788	1.0144	0.993819	1.02173	1.00692	1.0031
64	chr1	33958688	34452171	1.0003	1.03842	1.02388	1.0027	1.01319	1.02737	1.00652	1.0539	1.10241	1.05475	1.04739	1.00672	0.996207	1.00511	1.04687	1.03241	1.00965	1.04812	0.99372	1.02327	1.02624	0.983931	1.014	1.00471	1.02624	0.997104	1.03221	1.02194	0.984029	1.20334	1.01603	1.0028	0.994217	0.985408	0.982652	1.00823	1.02501	0.688734	1.0031	1.0009	0.986788	1.0144	0.993819	1.02173	1.00692	1.0031
65	chr1	34452172	34989422	1.0003	1.03842	1.02388	1.0027	1.01319	1.02737	1.00652	1.0539	1.10241	1.05475	1.04739	1.00672	0.996207	1.00511	1.04687	1.03241	1.00965	1.04812	0.99372	1.02327	1.02624	0.983931	1.014	1.00471	1.02624	0.997104	1.03221	1.02194	0.984029	1.20334	1.01603	1.0028	0.994217	0.985408	0.982652	1.00823	1.02501	0.688734	1.0031	1.0009	0.986788	1.0144	0.993819	1.02173	1.00692	1.0031
66	chr1	34989423	35549642	1.0003	1.03842	1.02388	1.0027	1.01319	1.02737	1.00652	1.0539	1.10241	1.05475	1.04739	1.00672	0.996207	1.00511	1.04687	1.03241	1.00965	1.04812	0.99372	1.02327	1.02624	0.983931	1.014	1.00471	1.02624	0.997104	1.03221	1.02194	0.984029	1.20334	1.01603	1.0028	0.994217	0.985408	0.982652	1.00823	1.02501	0.688734	1.0031	1.0009	0.986788	1.0144	0.993819	1.02173	1.00692	1.0031
67	chr1	35549643	36138499	1.0003	1.03842	1.02388	1.0027	1.01319	1.02737	1.00652	1.0539	1.10241	1.05475	1.04739	1.00672	0.996207	1.00511	1.04687	1.03241	1.00965	1.04812	0.99372	1.02327	1.02624	0.983931	1.014	1.00471	1.02624	0.997104	1.03221	1.02194	0.984029	1.20334	1.01603	1.0028	0.994217	0.985408	0.982652	1.00823	1.02501	0.688734	1.0031	1.0009	0.986788	1.0144	0.993819	1.02173	1.00692	1.0031
68	chr1	36138500	36727231	1.0003	1.03842	1.02388	1.0027	1.01319	1.02737	1.00652	1.0539	1.10241	1.05475	1.04739	1.00672	0.996207	1.00511	1.04687	1.03241	1.00965	1.04812	0.99372	1.02327	1.02624	0.983931	1.014	1.00471	1.02624	0.997104	1.03221	1.02194	0.984029	1.20334	1.01603	1.0028	0.994217	0.985408	0.982652	1.00823	1.02501	1.08806	1.0031	1.0009	0.986788	1.0144	0.993819	1.02173	1.00692	1.0031
69	chr1	36727232	37235739	1.0003	1.03842	1.02388	1.0027	1.01319	1.02737	1.00652	1.0539	1.10241	1.05475	1.04739	1.00672	0.996207	1.00511	1.04687	1.03241	1.00965	1.04812	0.99372	1.02327	1.02624	0.983931	1.014	1.00471	1.02624	0.997104	1.03221	1.02194	0.984029	1.20334	1.01603	1.0028	0.994217	0.985408	0.982652	1.00823	1.02501	1.08806	1.0031	1.0009	0.986788	1.0144	0.993819	1.02173	1.00692	1.0031
70	chr1	37235740	37748931	1.0003	1.03842	1.02388	1.0027	1.01319	1.02737	1.00652	1.0539	1.10241	1.05475	1.04739	1.00672	0.996207	1.00511	1.04687	1.03241	1.00965	1.04812	0.99372	1.02327	1.02624	0.983931	1.014	1.00471	1.02624	0.997104	1.03221	1.02194	0.984029	1.20334	1.01603	1.0028	0.994217	0.985408	0.982652	1.00823	1.02501	1.08806	1.0031	1.0009	0.986788	1.0144	0.993819	1.02173	1.00692	1.0031
71	chr1	37748932	38289538	1.0003	1.03842	1.02388	1.0027	1.01319	1.02737	1.00652	1.0539	1.10241	1.05475	1.04739	1.00672	0.996207	1.00511	1.04687	1.03241	1.00965	1.04812	0.99372	1.02327	1.02624	0.983931	1.014	1.00471	1.02624	0.997104	1.03221	1.02194	0.984029	1.20334	1.01603	1.0028	0.994217	0.985408	0.982652	1.00823	1.02501	1.08806	1.0031	1.0009	0.986788	1.0144	0.993819	1.02173	1.00692	1.0031
72	chr1	38289539	38829953	1.0003	1.03842	1.02388	1.0027	1.01319	1.02737	1.00652	1.0539	1.10241	1.05475	1.04739	1.00672	0.996207	1.00511	1.04687	1.03241	1.00965	1.04812	0.99372	1.02327	1.02624	0.983931	1.014	1.00471	1.02624	0.997104	1.03221	1.02194	0.984029	1.20334	1.01603	1.0028	0.994217	0.985408	0.982652	1.00823	1.02501	1.08806	1.0031	1.0009	0.986788	1.0144	0.993819	1.02173	1.00692	1.0031
73	chr1	38829954	39368644	1.0003	1.03842	1.02388	1.0027	1.01319	1.02737	1.00652	1.0539	1.10241	1.05475	1.04739	1.00672	0.996207	1.00511	1.04687	1.03241	1.00965	1.04812	0.99372	1.02327	1.02624	0.983931	1.014	1.00471	1.02624	0.997104	1.03221	1.02194	0.984029	1.20334	1.01603	1.0028	0.994217	0.985408	0.982652	1.00823	1.02501	1.08806	1.0031	1.0009	0.986788	1.0144	0.993819	1.02173	1.00692	1.0031
74	chr1	39368645	39955961	1.0003	1.03842	1.02388	1.0027	1.01319	1.02737	1.00652	1.0539	1.10241	1.05475	1.04739	1.00672	0.996207	1.00511	1.04687	1.03241	1.00965	1.04812	0.99372	1.02327	1.02624	0.983931	1.014	1.00471	1.02624	0.997104	1.03221	1.02194	0.984029	1.20334	1.01603	1.0028	0.994217	0.985408	0.982652	1.00823	1.02501	1.08806	1.0031	1.0009	0.986788	1.0144	0.993819	1.02173	1.00692	1.0031
75	chr1	39955962	40517524	1.0003	1.03842	1.02388	1.0027	1.01319	1.02737	1.00652	1.0539	1.10241	1.05475	1.04739	1.00672	0.996207	1.00511	1.04687	1.03241	1.00965	1.04812	0.99372	1.02327	1.02624	0.983931	1.014	1.00471	1.02624	0.997104	1.03221	1.02194	0.984029	0.989258	1.01603	1.0028	0.994217	0.985408	0.982652	1.00823	1.02501	1.08806	1.0031	1.0009	0.986788	1.0144	0.993819	1.02173	1.00692	1.0031
76	chr1	40517525	41094253	1.0003	1.03842	1.02388	1.0027	1.01319	1.02737	1.00652	1.0539	1.10241	1.05475	1.04739	1.00672	0.996207	1.00511	1.04687	1.03241	1.00965	1.04812	0.99372	1.02327	1.02624	0.983931	1.014	1.00471	1.02624	0.997104	1.03221	1.02194	0.984029	0.989258	1.01603	1.0028	0.994217	0.985408	0.982652	1.00823	1.02501	1.08806	1.0031	1.0009	0.986788	1.0144	0.993819	1.02173	1.00692	1.0031
77	chr1	41094254	41646374	1.0003	1.03842	1.02388	1.0027	1.01319	1.02737	1.00652	1.0539	1.10241	1.05475	1.04739	1.00672	0.996207	1.00511	1.04687	1.03241	1.00965	1.04812	0.99372	1.02327	1.02624	0.983931	1.014	1.00471	1.02624	0.997104	1.03221	1.02194	0.984029	0.989258	1.01603	1.0028	0.994217	0.985408	0.982652	1.00823	1.02501	1.08806	1.0031	1.0009	0.986788	1.0144	0.993819	1.02173	1.00692	1.0031
78	chr1	41646375	42165436	1.0003	1.03842	1.02388	1.0027	1.01319	1.02737	1.00652	1.0539	1.10241	1.05475	1.04739	1.00672	0.996207	1.00511	1.04687	1.03241	1.00965	1.04812	0.99372	1.02327	1.02624	0.983931	1.014	1.00471	1.02624	0.997104	1.03221	1.02194	0.984029	0.989258	1.01603	1.0028	0.994217	0.985408	0.982652	1.00823	1.02501	1.08806	1.0031	1.0009	0.986788	1.0144	0.993819	1.02173	1.00692	1.0031
79	chr1	42165437	42694462	1.0003	1.03842	1.02388	1.0027	1.01319	1.02737	1.00652	1.0539	1.10241	1.05475	1.04739	1.00672	0.996207	1.00511	1.04687	1.03241	1.00965	1.04812	0.99372	1.02327	1.02624	0.983931	1.014	1.00471	1.02624	0.997104	1.03221	1.02194	0.984029	0.989258	1.01603	1.0028	0.994217	0.985408	0.982652	1.00823	1.02501	1.08806	1.0031	1.0009	0.986788	1.0144	0.993819	1.02173	1.00692	1.0031
80	chr1	42694463	43249010	1.0003	1.03842	1.02388	1.0027	1.01319	1.02737	1.00652	1.0539	1.10241	1.05475	1.04739	1.00672	0.996207	1.00511	1.04687	1.03241	1.00965	1.04812	0.99372	1.02327	1.02624	0.983931	1.014	1.00471	1.02624	0.997104	1.03221	1.02194	0.984029	0.989258	1.01603	1.0028	0.994217	0.985408	0.982652	1.00823	1.02501	1.08806	1.0031	1.0009	0.986788	1.0144	0.993819	1.02173	1.00692	1.0031
81	chr1	43249011	43794406	1.0003	1.03842	1.02388	1.0027	1.01319	1.02737	1.00652	1.0539	1.10241	1.05475	1.04739	1.00672	0.996207	1.00511	1.04687	1.03241	1.00965	1.04812	0.99372	1.02327	1.02624	0.983931	1.014	1.00471	1.02624	0.997104	1.03221	1.02194	0.984029	0.989258	1.01603	1.0028	0.994217	0.985408	0.982652	1.00823	1.02501	1.08806	1.0031	1.0009	0.986788	1.0144	0.993819	1.02173	1.00692	1.0031
82	chr1	43794407	44316124	1.0003	1.03842	1.02388	1.0027	1.01319	1.02737	1.00652	1.0539	1.10241	1.05475	1.04739	1.00672	0.996207	1.00511	1.04687	1.03241	1.00965	1.04812	0.99372	1.02327	1.02624	0.983931	1.014	1.00471	1.02624	0.997104	1.03221	1.02194	0.984029	0.989258	1.01603	1.0028	0.994217	0.985408	0.982652	1.00823	1.02501	1.08806	1.0031	1.0009	0.986788	1.0144	0.993819	1.02173	1.00692	1.0031
83	chr1	44316125	44825171	1.0003	1.03842	1.02388	1.0027	1.01319	1.02737	1.00652	1.0539	1.10241	1.05475	1.04739	1.00672	0.996207	1.00511	1.04687	1.03241	1.00965	1.04812	0.99372	1.02327	1.02624	0.983931	1.014	1.00471	1.02624	0.997104	1.03221	1.02194	0.984029	0.989258	1.01603	1.0028	0.994217	0.985408	0.982652	1.00823	1.02501	1.08806	1.0031	1.0009	0.986788	1.0144	0.993819	1.02173	1.00692	1.0031
84	chr1	44825172	45381782	1.0003	1.03842	1.02388	1.0027	1.01319	1.02737	1.00652	1.0539	1.10241	1.05475	1.04739	1.00672	0.996207	1.00511	1.04687	1.03241	1.00965	1.04812	0.99372	1.02327	1.02624	0.983931	1.014	1.00471	1.02624	0.997104	1.03221	1.02194	0.984029	0.989258	1.01603	1.0028	0.994217	0.985408	0.982652	1.00823	1.02501	1.08806	1.0031	1.0009	0.986788	1.0144	0.993819	1.02173	1.00692	1.0031
85	chr1	45381783	45982407	1.0003	1.03842	1.02388	1.0027	1.01319	1.02737	1.00652	1.0539	1.10241	1.05475	1.04739	1.00672	0.996207	1.00511	1.04687	1.03241	1.00965	1.04812	0.99372	1.02327	1.02624	0.983931	1.014	1.00471	1.02624	0.997104	1.03221	1.02194	0.984029	0.989258	1.01603	1.0028	0.994217	0.985408	0.982652	1.00823	1.02501	1.08806	1.0031	1.0009	0.986788	1.0144	0.993819	1.02173	1.00692	1.0031
86	chr1	45982408	46555657	1.0003	1.03842	1.02388	1.0027	1.01319	1.02737	1.00652	1.0539	1.10241	1.05475	1.04739	1.00672	0.996207	1.00511	1.04687	1.03241	1.00965	1.04812	0.99372	1.02327	1.02624	0.983931	1.014	1.00471	1.02624	0.997104	1.03221	1.02194	0.984029	0.989258	1.01603	1.0028	0.994217	0.985408	0.982652	1.00823	1.02501	1.08806	1.0031	1.0009	0.986788	1.0144	0.993819	1.02173	1.00692	1.0031
87	chr1	46555658	47105707	1.0003	1.03842	1.02388	1.0027	1.01319	1.02737	1.00652	1.0539	1.10241	1.05475	1.04739	1.00672	0.996207	1.00511	1.04687	1.03241	1.00965	1.04812	0.99372	1.02327	1.02624	0.983931	1.014	1.00471	1.02624	0.997104	1.03221	1.02194	0.984029	0.989258	1.01603	1.0028	0.994217	0.985408	0.982652	1.00823	1.02501	1.08806	1.0031	1.0009	0.986788	1.0144	0.993819	1.02173	1.00692	1.0031
88	chr1	47105708	47670062	1.0003	1.03842	1.02388	1.0027	1.01319	1.02737	1.00652	1.0539	1.10241	1.05475	1.04739	1.00672	0.996207	1.00511	1.04687	1.03241	1.00965	1.04812	0.99372	1.02327	1.02624	0.983931	1.014	1.00471	1.02624	0.997104	1.03221	1.02194	0.984029	0.989258	1.01603	1.0028	0.994217	0.985408	0.982652	1.00823	1.02501	1.08806	1.0031	1.0009	0.986788	1.0144	0.993819	1.02173	1.00692	1.0031
89	chr1	47670063	48225609	1.0003	1.03842	1.02388	1.0027	1.01319	1.02737	1.00652	1.0539	1.10241	1.05475	1.04739	1.00672	0.996207	1.00511	1.04687	1.03241	1.00965	1.04812	0.99372	1.02327	1.02624	0.983931	1.014	1.00471	1.02624	0.997104	1.03221	1.02194	0.984029	0.989258	1.01603	1.0028	0.994217	0.985408	0.982652	1.00823	1.02501	1.08806	1.0031	1.0009	0.986788	1.0144	0.993819	1.02173	1.00692	1.0031
90	chr1	48225610	48777902	1.0003	1.03842	1.02388	1.0027	1.01319	1.02737	1.00652	1.0539	1.10241	1.05475	1.04739	1.00672	0.996207	1.00511	1.04687	1.03241	1.00965	1.04812	0.99372	1.02327	1.02624	0.983931	1.014	1.00471	1.02624	0.997104	1.03221	1.02194	0.984029	0.989258	1.01603	1.0028	0.994217	0.985408	0.982652	1.00823	1.02501	1.08806	1.0031	1.0009	0.986788	1.0144	0.993819	1.02173	1.00692	1.0031
91	chr1	48777903	49334779	1.0003	1.03842	1.02388	1.0027	1.01319	1.02737	1.00652	1.0539	1.10241	1.05475	1.04739	1.00672	0.996207	1.00511	1.04687	1.03241	1.00965	1.04812	0.99372	1.02327	1.02624	0.983931	1.014	1.00471	1.02624	0.997104	1.03221	1.02194	0.984029	0.989258	1.01603	1.0028	0.994217	0.985408	0.982652	1.00823	1.02501	1.08806	1.0031	1.0009	0.986788	1.0144	0.993819	1.02173	1.00692	1.0031
92	chr1	49334780	49945727	1.0003	1.03842	1.02388	1.0027	1.01319	1.02737	1.00652	1.0539	1.10241	1.05475	1.04739	1.00672	0.996207	1.00511	1.04687	1.03241	1.00965	1.04812	0.99372	1.02327	1.02624	0.983931	1.014	1.00471	1.02624	0.997104	1.03221	1.02194	0.984029	0.989258	1.01603	1.0028	0.994217	0.985408	0.982652	1.00823	1.02501	1.08806	1.0031	1.0009	0.986788	1.0144	0.993819	1.02173	1.00692	1.0031
93	chr1	49945728	50600828	1.0003	1.03842	1.02388	1.0027	1.01319	1.02737	1.00652	1.0539	1.10241	1.05475	1.04739	1.00672	0.996207	1.00511	1.04687	1.03241	1.00965	1.04812	0.99372	1.02327	1.02624	0.983931	1.014	1.00471	1.02624	0.997104	1.03221	1.02194	0.984029	0.989258	1.01603	1.0028	0.994217	0.985408	0.982652	1.00823	1.02501	1.08806	1.0031	1.0009	0.986788	1.0144	0.993819	1.02173	1.00692	1.0031
94	chr1	50600829	51151005	1.0003	1.03842	1.02388	1.0027	1.01319	1.02737	1.00652	1.0539	1.10241	1.05475	1.04739	1.00672	0.996207	1.00511	1.04687	1.03241	1.00965	1.04812	0.99372	1.02327	1.02624	0.983931	1.014	1.00471	1.02624	0.997104	1.03221	1.02194	0.984029	0.989258	1.01603	1.0028	0.994217	0.985408	0.982652	1.00823	1.02501	1.08806	1.0031	1.0009	0.986788	1.0144	0.993819	1.02173	1.00692	1.0031
95	chr1	51151006	51757726	1.0003	1.03842	1.02388	1.0027	1.01319	1.02737	1.00652	1.0539	1.10241	1.05475	1.04739	1.00672	0.996207	1.00511	1.04687	1.03241	1.00965	1.04812	0.99372	1.02327	1.02624	0.983931	1.014	1.00471	1.02624	0.997104	1.03221	1.02194	0.984029	0.989258	1.01603	1.0028	0.994217	0.985408	0.982652	1.00823	1.02501	1.08806	1.0031	1.0009	0.986788	1.0144	0.993819	1.02173	1.00692	1.0031
96	chr1	51757727	52332791	1.0003	1.03842	1.02388	1.0027	1.01319	1.02737	1.00652	1.0539	1.10241	1.05475	1.04739	1.00672	0.996207	1.00511	1.04687	1.03241	1.00965	1.04812	0.99372	1.02327	1.02624	0.983931	1.014	1.00471	1.02624	0.997104	1.03221	1.02194	0.984029	0.989258	1.01603	1.0028	0.994217	0.985408	0.982652	1.00823	1.02501	1.08806	1.0031	1.0009	0.986788	1.0144	0.993819	1.02173	1.00692	1.0031
97	chr1	52332792	52882385	1.0003	1.03842	1.02388	1.0027	1.01319	1.02737	1.00652	1.0539	1.10241	1.05475	1.04739	1.00672	0.996207	1.00511	1.04687	1.03241	1.00965	1.04812	0.99372	1.02327	1.02624	0.983931	1.014	1.00471	1.02624	0.997104	1.03221	1.02194	0.984029	0.989258	1.01603	1.0028	0.994217	0.985408	0.982652	1.00823	1.02501	1.08806	1.0031	1.0009	0.986788	1.0144	0.993819	1.02173	1.00692	1.0031
98	chr1	52882386	53464136	1.0003	1.03842	1.02388	1.0027	1.01319	1.02737	1.00652	1.0539	1.10241	1.05475	1.04739	1.00672	0.996207	1.00511	1.04687	1.03241	1.00965	1.04812	0.99372	1.02327	1.02624	0.983931	1.014	1.00471	1.02624	0.997104	1.03221	1.02194	0.984029	0.989258	1.01603	1.0028	0.994217	0.985408	0.982652	1.00823	1.02501	1.08806	1.0031	1.0009	0.986788	1.0144	0.993819	1.02173	1.00692	1.0031
99	chr1	53464137	53974370	1.0003	1.03842	1.02388	1.0027	1.01319	1.02737	1.00652	1.0539	1.10241	1.05475	1.04739	1.00672	0.996207	1.00511	1.04687	1.03241	1.00965	1.04812	0.99372	1.02327	1.02624	0.983931	1.014	1.00471	1.02624	0.997104	1.03221	1.02194	0.984029	0.989258	1.01603	1.0028	0.994217	0.985408	0.982652	1.00823	1.02501	1.08806	1.0031	1.0009	0.986788	1.0144	0.993819	1.02173	1.00692	1.0031
100	chr1	53974371	54490830	1.0003	1.03842	1.02388	1.0027	1.01319	1.02737	1.00652	1.0539	1.10241	1.05475	1.04739	1.00672	0.996207	1.00511	1.04687	1.03241	1.00965	1.04812	0.99372	1.02327	1.02624	0.983931	1.014	1.00471	1.02624	0.997104	1.03221	1.02194	0.984029	0.989258	1.01603	1.0028	0.994217	0.985408	0.982652	1.00823	1.02501	1.08806	1.0031	1.0009	0.986788	1.0144	0.993819	1.02173	1.00692	1.0031
101	chr1	54490831	55017871	1.0003	1.03842	1.02388	1.0027	1.01319	1.02737	1.00652	1.0539	1.10241	1.05475	1.04739	1.00672	0.996207	1.00511	1.04687	1.03241	1.00965	1.04812	0.99372	1.02327	1.02624	0.983931	1.014	1.00471	1.02624	0.997104	1.03221	1.02194	0.984029	0.989258	1.01603	1.0028	0.994217	0.985408	0.982652	1.00823	1.02501	1.08806	1.0031	1.0009	0.986788	1.0144	0.993819	1.02173	1.00692	1.0031
102	chr1	55017872	55545268	1.0003	1.03842	1.02388	1.0027	1.01319	1.02737	1.00652	1.0539	1.10241	1.05475	1.04739	1.00672	0.996207	1.00511	1.04687	1.03241	1.00965	1.04812	0.99372	1.02327	1.02624	0.983931	1.014	1.00471	1.02624	0.997104	1.03221	1.02194	0.984029	0.989258	1.01603	1.0028	0.994217	0.985408	0.982652	1.00823	1.02501	1.08806	1.0031	1.0009	0.986788	1.0144	0.993819	1.02173	1.00692	1.0031
103	chr1	55545269	56071292	1.0003	1.03842	1.02388	1.0027	1.01319	1.02737	1.00652	1.0539	1.10241	1.05475	1.04739	1.00672	0.996207	1.00511	1.04687	1.03241	1.00965	1.04812	0.99372	1.02327	1.02624	0.983931	1.014	1.00471	1.02624	0.997104	1.03221	1.02194	0.984029	0.989258	1.01603	1.0028	0.994217	0.985408	0.982652	1.00823	1.02501	1.08806	1.0031	1.0009	0.986788	1.0144	0.993819	1.02173	1.00692	1.0031
104	chr1	56071293	56612909	1.0003	1.03842	1.02388	1.0027	1.01319	1.02737	1.00652	1.0539	1.10241	1.05475	1.04739	1.00672	0.996207	1.00511	1.04687	1.03241	1.00965	1.04812	0.99372	1.02327	1.02624	0.983931	1.014	1.00471	1.02624	0.997104	1.03221	1.02194	0.984029	0.989258	1.01603	1.0028	0.994217	0.985408	0.982652	1.00823	1.02501	1.08806	1.0031	1.0009	0.986788	1.0144	0.993819	1.02173	1.00692	1.0031
105	chr1	56612910	57165721	1.0003	1.03842	1.02388	1.0027	1.01319	1.02737	1.00652	1.0539	1.10241	1.05475	1.04739	1.00672	0.996207	1.00511	1.04687	1.03241	1.00965	1.04812	0.99372	1.02327	1.02624	0.983931	1.014	1.00471	1.02624	0.997104	1.03221	1.02194	0.984029	0.989258	1.01603	1.0028	0.994217	0.985408	0.982652	1.00823	1.02501	1.08806	1.0031	1.0009	0.986788	1.0144	0.993819	1.02173	1.00692	1.0031
106	chr1	57165722	57675614	1.0003	1.03842	1.02388	1.0027	1.01319	1.02737	1.00652	1.0539	1.10241	1.05475	1.04739	1.00672	0.996207	1.00511	1.04687	1.03241	1.00965	1.04812	0.99372	1.02327	1.02624	0.983931	1.014	1.00471	1.02624	0.997104	1.03221	1.02194	0.984029	0.989258	1.01603	1.0028	0.994217	0.985408	0.982652	1.00823	1.02501	1.08806	1.0031	1.0009	0.986788	1.0144	0.993819	1.02173	1.00692	1.0031
107	chr1	57675615	58207672	1.0003	1.03842	1.02388	1.0027	1.01319	1.02737	1.00652	1.0539	1.10241	1.05475	1.04739	1.00672	0.996207	1.00511	1.04687	1.03241	1.00965	1.04812	0.99372	1.02327	1.02624	0.983931	1.014	1.00471	1.02624	0.997104	1.03221	1.02194	0.984029	0.989258	1.01603	1.0028	0.994217	0.985408	0.982652	1.00823	1.02501	1.08806	1.0031	1.0009	0.986788	1.0144	0.993819	1.02173	1.00692	1.0031
108	chr1	58207673	58753761	1.0003	1.03842	1.02388	1.0027	1.01319	1.02737	1.00652	1.0539	1.10241	1.05475	1.04739	1.00672	0.996207	1.00511	1.04687	1.03241	1.00965	1.04812	0.99372	1.02327	1.02624	0.983931	1.014	1.00471	1.02624	0.997104	1.03221	1.02194	0.984029	0.989258	1.01603	1.0028	0.994217	0.985408	0.982652	1.00823	1.02501	1.08806	1.0031	1.0009	0.986788	1.0144	0.993819	1.02173	1.00692	1.0031
109	chr1	58753762	59296770	1.0003	1.03842	1.02388	1.0027	1.01319	1.02737	1.00652	1.0539	1.10241	1.05475	1.04739	1.00672	0.996207	1.00511	1.04687	1.03241	1.00965	1.04812	0.99372	1.02327	1.02624	0.983931	1.014	1.00471	1.02624	0.997104	1.03221	1.02194	0.984029	0.989258	1.01603	1.0028	0.994217	0.985408	0.982652	1.00823	1.02501	1.08806	1.0031	1.0009	0.986788	1.0144	0.993819	1.02173	1.00692	1.0031
110	chr1	59296771	59806590	1.0003	1.03842	1.02388	1.0027	1.01319	1.02737	1.00652	1.0539	1.10241	1.05475	1.04739	1.00672	0.996207	1.00511	1.04687	1.03241	1.00965	1.04812	0.99372	1.02327	1.02624	0.983931	1.014	1.00471	1.02624	0.997104	1.03221	1.02194	0.984029	0.989258	1.01603	1.0028	0.994217	0.985408	0.982652	1.00823	1.02501	1.08806	1.0031	1.0009	0.986788	1.0144	0.993819	1.02173	1.00692	1.0031
111	chr1	59806591	60380718	1.0003	1.03842	1.02388	1.0027	1.01319	1.02737	1.00652	1.0539	1.10241	1.05475	1.04739	1.00672	0.996207	1.00511	1.04687	1.03241	1.00965	1.04812	0.99372	1.02327	1.02624	0.983931	1.014	1.00471	1.02624	0.997104	1.03221	1.02194	0.984029	0.989258	1.01603	1.0028	0.994217	0.985408	0.982652	1.00823	1.02501	1.08806	1.0031	1.0009	0.986788	1.0144	0.993819	1.02173	1.00692	1.0031
112	chr1	60380719	60939726	1.0003	1.03842	1.02388	1.0027	1.01319	1.02737	1.00652	1.0539	1.10241	1.05475	1.04739	1.00672	0.996207	1.00511	1.04687	1.03241	1.00965	1.04812	0.99372	1.02327	1.02624	0.983931	1.014	1.00471	1.02624	0.997104	1.03221	1.02194	0.984029	0.989258	1.01603	1.0028	0.994217	0.985408	0.982652	1.00823	1.02501	1.08806	1.0031	1.0009	0.986788	1.0144	0.993819	1.02173	1.00692	1.0031
113	chr1	60939727	61522369	1.0003	1.03842	1.02388	1.0027	1.01319	1.02737	1.00652	1.0539	1.10241	1.05475	1.04739	1.00672	0.996207	1.00511	1.04687	1.03241	1.00965	1.04812	0.99372	1.02327	1.02624	0.983931	1.014	1.00471	1.02624	0.997104	1.03221	1.02194	0.984029	0.989258	1.01603	1.0028	0.994217	0.985408	0.982652	1.00823	1.02501	1.08806	1.0031	1.0009	0.986788	1.0144	0.993819	1.02173	1.00692	1.0031
114	chr1	61522370	62069927	1.0003	1.03842	1.02388	1.0027	1.01319	1.02737	1.00652	1.0539	1.10241	1.05475	1.04739	1.00672	0.996207	1.00511	1.04687	1.03241	1.00965	1.04812	0.99372	1.02327	1.02624	0.983931	1.014	1.00471	1.02624	0.997104	1.03221	1.02194	0.984029	0.989258	1.01603	1.0028	0.994217	0.985408	0.982652	1.00823	1.02501	1.08806	1.0031	1.0009	0.986788	1.0144	0.993819	1.02173	1.00692	1.0031
115	chr1	62069928	62645996	1.0003	1.03842	1.02388	1.0027	1.01319	1.02737	1.00652	1.0539	1.10241	1.05475	1.04739	1.00672	0.996207	1.00511	1.04687	1.03241	1.00965	1.04812	0.99372	1.02327	1.02624	0.983931	1.014	1.00471	1.02624	0.997104	1.03221	1.02194	0.984029	0.989258	1.01603	1.0028	0.994217	0.985408	0.982652	1.00823	1.02501	1.08806	1.0031	1.0009	0.986788	1.0144	0.993819	1.02173	1.00692	1.0031
116	chr1	62645997	63216789	1.0003	1.03842	1.02388	1.0027	1.01319	1.02737	1.00652	1.0539	1.10241	1.05475	1.04739	1.00672	0.996207	1.00511	1.04687	1.03241	1.00965	1.04812	0.99372	1.02327	1.02624	0.983931	1.014	1.00471	1.02624	0.997104	1.03221	1.02194	0.984029	0.989258	1.01603	1.0028	0.994217	0.985408	0.982652	1.00823	1.02501	1.08806	1.0031	1.0009	0.986788	1.0144	0.993819	1.02173	1.00692	1.0031
117	chr1	63216790	63778331	1.0003	1.03842	1.02388	1.0027	1.01319	1.02737	1.00652	1.0539	1.10241	1.05475	1.04739	1.00672	0.996207	1.00511	1.04687	1.03241	1.00965	1.04812	0.99372	1.02327	1.02624	0.983931	1.014	1.00471	1.02624	0.997104	1.03221	1.02194	0.984029	0.989258	1.01603	1.0028	0.994217	0.985408	0.982652	1.00823	1.02501	1.08806	1.0031	1.0009	0.986788	1.0144	0.993819	1.02173	1.00692	1.0031
118	chr1	63778332	64357321	1.0003	1.03842	1.02388	1.0027	1.01319	1.02737	1.00652	1.0539	1.10241	1.05475	1.04739	1.00672	0.996207	1.00511	1.04687	1.03241	1.00965	1.04812	0.99372	1.02327	1.02624	0.983931	1.014	1.00471	1.02624	0.997104	1.03221	1.02194	0.984029	0.989258	1.01603	1.0028	0.994217	0.985408	0.982652	1.00823	1.02501	1.08806	1.0031	1.0009	0.986788	1.0144	0.993819	1.02173	1.00692	1.0031
119	chr1	64357322	64893475	1.0003	1.03842	1.02388	1.0027	1.01319	1.02737	1.00652	1.0539	1.10241	1.05475	1.04739	1.00672	0.996207	1.00511	1.04687	1.03241	1.00965	1.04812	0.99372	1.02327	1.02624	0.983931	1.014	1.00471	1.02624	0.997104	1.03221	1.02194	0.984029	0.989258	1.01603	1.0028	0.994217	0.985408	0.982652	1.00823	1.02501	1.08806	1.0031	1.0009	0.986788	1.0144	0.993819	1.02173	1.00692	1.0031
120	chr1	64893476	65443747	1.0003	1.03842	1.02388	1.0027	1.01319	1.02737	1.00652	1.0539	1.10241	1.05475	1.04739	1.00672	0.996207	1.00511	1.04687	1.03241	1.00965	1.04812	0.99372	1.02327	1.02624	0.983931	1.014	1.00471	1.02624	0.997104	1.03221	1.02194	0.984029	0.989258	1.01603	1.0028	0.994217	0.985408	0.982652	1.00823	1.02501	1.08806	1.0031	1.0009	0.986788	1.0144	0.993819	1.02173	1.00692	1.0031
121	chr1	65443748	66034896	1.0003	1.03842	1.02388	1.0027	1.01319	1.02737	1.00652	1.0539	1.10241	1.05475	1.04739	1.00672	0.996207	1.00511	1.04687	1.03241	1.00965	1.04812	0.99372	1.02327	1.02624	0.983931	1.014	1.00471	1.02624	0.997104	1.03221	1.02194	0.984029	0.989258	1.01603	1.0028	0.994217	0.985408	0.982652	1.00823	1.02501	1.08806	1.0031	1.0009	0.986788	1.0144	0.993819	1.02173	1.00692	1.0031
122	chr1	66034897	66634161	1.0003	1.03842	1.02388	1.0027	1.01319	1.02737	1.00652	1.0539	1.10241	1.05475	1.04739	1.00672	0.996207	1.00511	1.04687	1.03241	1.00965	1.04812	0.99372	1.02327	1.02624	0.983931	1.014	1.00471	1.02624	0.997104	1.03221	1.02194	0.984029	0.989258	1.01603	1.0028	0.994217	0.985408	0.982652	1.00823	1.02501	1.08806	1.0031	1.0009	0.986788	1.0144	0.993819	1.02173	1.00692	1.0031
123	chr1	66634162	67152832	1.0003	1.03842	1.02388	1.0027	1.01319	1.02737	1.00652	1.0539	1.10241	1.05475	1.04739	1.00672	0.996207	1.00511	1.04687	1.03241	1.00965	1.04812	0.99372	1.02327	1.02624	0.983931	1.014	1.00471	1.02624	0.997104	1.03221	1.02194	0.984029	0.989258	1.01603	1.0028	0.994217	0.985408	0.982652	1.00823	1.02501	1.08806	1.0031	1.0009	0.986788	1.0144	0.993819	1.02173	1.00692	1.0031
124	chr1	67152833	67732351	1.0003	1.03842	1.02388	1.0027	1.01319	1.02737	1.00652	1.0539	1.10241	1.05475	1.04739	1.00672	0.996207	1.00511	1.04687	1.03241	1.00965	1.04812	0.99372	1.02327	1.02624	0.983931	1.014	1.00471	1.02624	0.997104	1.03221	1.02194	0.984029	0.989258	1.01603	1.0028	0.994217	0.985408	0.982652	1.00823	1.02501	1.08806	1.0031	1.0009	0.986788	1.0144	0.993819	1.02173	1.00692	1.0031
125	chr1	67732352	68276604	1.0003	1.03842	1.02388	1.0027	1.01319	1.02737	1.00652	1.0539	1.10241	1.05475	1.04739	1.00672	0.996207	1.00511	1.04687	1.03241	1.00965	1.04812	0.99372	1.02327	1.02624	0.983931	1.014	1.00471	1.02624	0.997104	1.03221	1.02194	0.984029	0.989258	1.01603	1.0028	0.994217	0.985408	0.982652	1.00823	1.02501	1.08806	1.0031	1.0009	0.986788	1.0144	0.993819	1.02173	1.00692	1.0031
126	chr1	68276605	68817623	1.0003	1.03842	1.02388	1.0027	1.01319	1.02737	1.00652	1.0539	1.10241	1.05475	1.04739	1.00672	0.996207	1.00511	1.04687	1.03241	1.00965	1.04812	0.99372	1.02327	1.02624	0.983931	1.014	1.00471	1.02624	0.997104	1.03221	1.02194	0.984029	0.989258	1.01603	1.0028	0.994217	0.985408	0.982652	1.00823	1.02501	1.08806	1.0031	1.0009	0.986788	1.0144	0.993819	1.02173	1.00692	1.0031
127	chr1	68817624	69418625	1.0003	1.03842	1.02388	1.0027	1.01319	1.02737	1.00652	1.0539	1.10241	1.05475	1.04739	1.00672	0.996207	1.00511	1.04687	1.03241	1.00965	1.04812	0.99372	1.02327	1.02624	0.983931	1.014	1.00471	1.02624	0.997104	1.03221	1.02194	0.984029	0.989258	1.01603	1.0028	0.994217	0.985408	0.982652	1.00823	1.02501	1.08806	1.0031	1.0009	0.986788	1.0144	0.993819	1.02173	1.00692	1.0031
128	chr1	69418626	70050103	1.0003	1.03842	1.02388	1.0027	1.01319	1.02737	1.00652	1.0539	1.10241	1.05475	1.04739	1.00672	0.996207	1.00511	1.04687	1.03241	1.00965	1.04812	0.99372	1.02327	1.02624	0.983931	1.014	1.00471	1.02624	0.997104	1.03221	1.02194	0.984029	0.989258	1.01603	1.0028	0.994217	0.985408	0.982652	1.00823	1.02501	1.08806	1.0031	1.0009	0.986788	1.0144	0.993819	1.02173	1.00692	1.0031
129	chr1	70050104	70656974	1.0003	1.03842	1.02388	1.0027	1.01319	1.02737	1.00652	1.0539	1.10241	1.05475	1.04739	1.00672	0.996207	1.00511	1.04687	1.03241	1.00965	1.04812	0.99372	1.02327	1.02624	0.983931	1.014	1.00471	1.02624	0.997104	1.03221	1.02194	0.984029	0.989258	1.01603	1.0028	0.994217	0.985408	0.982652	1.00823	1.02501	1.08806	1.0031	1.0009	0.986788	1.0144	0.993819	1.02173	1.00692	1.0031
130	chr1	70656975	71257566	1.0003	1.03842	1.02388	1.0027	1.01319	1.02737	1.00652	1.0539	1.10241	1.05475	1.04739	1.00672	0.996207	1.00511	1.04687	1.03241	1.00965	1.04812	0.99372	1.02327	1.02624	0.983931	1.014	1.00471	1.02624	0.997104	1.03221	1.02194	0.984029	0.989258	1.01603	1.0028	0.994217	0.985408	0.982652	1.00823	1.02501	1.08806	1.0031	1.0009	0.986788	1.0144	0.993819	1.02173	1.00692	1.0031
131	chr1	71257567	71845356	1.0003	1.03842	1.02388	1.0027	1.01319	1.02737	1.00652	1.0539	1.10241	1.05475	1.04739	1.00672	0.996207	1.00511	1.04687	1.03241	1.00965	1.04812	0.99372	1.02327	1.02624	0.983931	1.014	1.00471	1.02624	0.997104	1.03221	1.02194	0.984029	0.989258	1.01603	1.0028	0.994217	0.985408	0.982652	1.00823	1.02501	1.08806	1.0031	1.0009	0.986788	1.0144	0.993819	1.02173	1.00692	1.0031
132	chr1	71845357	72472429	1.0003	1.03842	1.02388	1.0027	1.01319	1.02737	1.00652	1.0539	1.10241	1.05475	1.04739	1.00672	0.996207	1.00511	1.04687	1.03241	1.00965	1.04812	0.99372	1.02327	1.02624	0.983931	1.014	1.00471	1.02624	0.997104	1.03221	1.02194	0.984029	0.989258	1.01603	1.0028	0.994217	0.985408	0.982652	1.00823	1.02501	1.08806	1.0031	1.0009	0.986788	1.0144	0.993819	1.02173	1.00692	1.0031
133	chr1	72472430	73144554	1.0003	1.03842	1.02388	1.0027	1.01319	1.02737	1.00652	1.0539	1.10241	1.05475	1.04739	1.00672	0.996207	1.00511	1.04687	1.03241	1.00965	1.04812	0.99372	1.02327	1.02624	0.983931	1.014	1.00471	1.02624	0.997104	1.03221	1.02194	0.984029	0.989258	1.01603	1.0028	0.994217	0.985408	0.982652	1.00823	1.02501	1.08806	1.0031	1.0009	0.986788	1.0144	0.993819	1.02173	1.00692	1.0031
134	chr1	73144555	73774849	1.0003	1.03842	1.02388	1.0027	1.01319	1.02737	1.00652	1.0539	1.10241	1.05475	1.04739	1.00672	0.996207	1.00511	1.04687	1.03241	1.00965	1.04812	0.99372	1.02327	1.02624	0.983931	1.014	1.00471	1.02624	0.997104	1.03221	1.02194	0.984029	0.989258	1.01603	1.0028	0.994217	0.985408	0.982652	1.00823	1.02501	1.08806	1.0031	1.0009	0.986788	1.0144	0.993819	1.02173	1.00692	1.0031
135	chr1	73774850	74407237	1.0003	1.03842	1.02388	1.0027	1.01319	1.02737	1.00652	1.0539	1.10241	1.05475	1.04739	1.00672	0.996207	1.00511	1.04687	1.03241	1.00965	1.04812	0.99372	1.02327	1.02624	0.983931	1.014	1.00471	1.02624	0.997104	1.03221	1.02194	0.984029	0.989258	1.01603	1.0028	0.994217	0.985408	0.982652	1.00823	1.02501	1.08806	1.0031	1.0009	0.986788	1.0144	0.993819	1.02173	1.00692	1.0031
136	chr1	74407238	75045278	1.0003	1.03842	1.02388	1.0027	1.01319	1.02737	1.00652	1.0539	1.10241	1.05475	1.04739	1.00672	0.996207	1.00511	1.04687	1.03241	1.00965	1.04812	0.99372	1.02327	1.02624	0.983931	1.014	1.00471	1.02624	0.997104	1.03221	1.02194	0.984029	0.989258	1.01603	1.0028	0.994217	0.985408	0.982652	1.00823	1.02501	1.08806	1.0031	1.0009	0.986788	1.0144	0.993819	1.02173	1.00692	1.0031
137	chr1	75045279	75662881	1.0003	1.03842	1.02388	1.0027	1.01319	1.02737	1.00652	1.0539	1.10241	1.05475	1.04739	1.00672	0.996207	1.00511	1.04687	1.03241	1.00965	1.04812	0.99372	1.02327	1.02624	0.983931	1.014	1.00471	1.02624	0.997104	1.03221	1.02194	0.984029	0.989258	1.01603	1.0028	0.994217	0.985408	0.982652	1.00823	1.02501	1.08806	1.0031	1.0009	0.986788	1.0144	0.993819	1.02173	1.00692	1.0031
138	chr1	75662882	76288206	1.0003	1.03842	1.02388	1.0027	1.01319	1.02737	1.00652	1.0539	1.10241	1.05475	1.04739	1.00672	0.996207	1.00511	1.04687	1.03241	1.00965	1.04812	0.99372	1.02327	1.02624	0.983931	1.014	1.00471	1.02624	0.997104	1.03221	1.02194	0.984029	0.989258	1.01603	1.0028	0.994217	0.985408	0.982652	1.00823	1.02501	1.08806	1.0031	1.0009	0.986788	1.0144	0.993819	1.02173	1.00692	1.0031
139	chr1	76288207	76875077	1.0003	1.03842	1.02388	1.0027	1.01319	1.02737	1.00652	1.0539	1.10241	1.05475	1.04739	1.00672	0.996207	1.00511	1.04687	1.03241	1.00965	1.04812	0.99372	1.02327	1.02624	0.983931	1.014	1.00471	1.02624	0.997104	1.03221	1.02194	0.984029	0.989258	1.01603	1.0028	0.994217	0.985408	0.982652	1.00823	1.02501	1.08806	1.0031	1.0009	0.986788	1.0144	0.993819	1.02173	1.00692	1.0031
140	chr1	76875078	77433567	1.0003	1.03842	1.02388	1.0027	1.01319	1.02737	1.00652	1.0539	1.10241	1.05475	1.04739	1.00672	0.996207	1.00511	1.04687	1.03241	1.00965	1.04812	0.99372	1.02327	1.02624	0.983931	1.014	1.00471	1.02624	0.997104	1.03221	1.02194	0.984029	0.989258	1.01603	1.0028	0.994217	0.985408	0.982652	1.00823	1.02501	1.08806	1.0031	1.0009	0.986788	1.0144	0.993819	1.02173	1.00692	1.0031
141	chr1	77433568	78014083	1.0003	1.03842	1.02388	1.0027	1.01319	1.02737	1.00652	1.0539	1.10241	1.05475	1.04739	1.00672	0.996207	1.00511	1.04687	1.03241	1.00965	1.04812	0.99372	1.02327	1.02624	0.983931	1.014	1.00471	1.02624	0.997104	1.03221	1.02194	0.984029	0.989258	1.01603	1.0028	0.994217	0.985408	0.982652	1.00823	1.02501	1.08806	1.0031	1.0009	0.986788	1.0144	0.993819	1.02173	1.00692	1.0031
142	chr1	78014084	78608752	1.0003	1.03842	1.02388	1.0027	1.01319	1.02737	1.00652	1.0539	1.10241	1.05475	1.04739	1.00672	0.996207	1.00511	1.04687	1.03241	1.00965	1.04812	0.99372	1.02327	1.02624	0.983931	1.014	1.00471	1.02624	0.997104	1.03221	1.02194	0.984029	0.989258	1.01603	1.0028	0.994217	0.985408	0.982652	1.00823	1.02501	1.08806	1.0031	1.0009	0.986788	1.0144	0.993819	1.02173	1.00692	1.0031
143	chr1	78608753	79191996	1.0003	1.03842	1.02388	1.0027	1.01319	1.02737	1.00652	1.0539	1.10241	1.05475	1.04739	1.00672	0.996207	1.00511	1.04687	1.03241	1.00965	1.04812	0.99372	1.02327	1.02624	0.983931	1.014	1.00471	1.02624	0.997104	1.03221	1.02194	0.984029	0.989258	1.01603	1.0028	0.994217	0.985408	0.982652	1.00823	1.02501	1.08806	1.0031	1.0009	0.986788	1.0144	0.993819	1.02173	1.00692	1.0031
144	chr1	79191997	79812996	1.0003	1.03842	1.02388	1.0027	1.01319	1.02737	1.00652	1.0539	1.10241	1.05475	1.04739	1.00672	0.996207	1.00511	1.04687	1.03241	1.00965	1.04812	0.99372	1.02327	1.02624	0.983931	1.014	1.00471	1.02624	0.997104	1.03221	1.02194	0.984029	0.989258	1.01603	1.0028	0.994217	0.985408	0.982652	1.00823	1.02501	1.08806	1.0031	1.0009	0.986788	1.0144	0.993819	1.02173	1.00692	1.0031
145	chr1	79812997	80447542	1.0003	1.03842	1.02388	1.0027	1.01319	1.02737	1.00652	1.0539	1.10241	1.05475	1.04739	1.00672	0.996207	1.00511	1.04687	1.03241	1.00965	1.04812	0.99372	1.02327	1.02624	0.983931	1.014	1.00471	1.02624	0.997104	1.03221	1.02194	0.984029	0.989258	1.01603	1.0028	0.994217	0.985408	0.982652	1.00823	1.02501	1.08806	1.0031	1.0009	0.986788	1.0144	0.993819	1.02173	1.00692	1.0031
146	chr1	80447543	81097252	1.0003	1.03842	1.02388	1.0027	1.01319	1.02737	1.00652	1.0539	1.10241	1.05475	1.04739	1.00672	0.996207	1.00511	1.04687	1.03241	1.00965	1.04812	0.99372	1.02327	1.02624	0.983931	1.014	1.00471	1.02624	0.997104	1.03221	1.02194	0.984029	0.989258	1.01603	1.0028	0.994217	0.985408	0.982652	1.00823	1.02501	1.08806	1.0031	1.0009	0.986788	1.0144	0.993819	1.02173	1.00692	1.0031
147	chr1	81097253	81720993	1.0003	1.03842	1.02388	1.0027	1.01319	1.02737	1.00652	1.0539	1.10241	1.05475	1.04739	1.00672	0.996207	1.00511	1.04687	1.03241	1.00965	1.04812	0.99372	1.02327	1.02624	0.983931	1.014	1.00471	1.02624	0.997104	1.03221	1.02194	0.984029	0.989258	1.01603	1.0028	0.994217	0.985408	0.982652	1.00823	1.02501	1.08806	1.0031	1.0009	0.986788	1.0144	0.993819	1.02173	1.00692	1.0031
148	chr1	81720994	82290104	1.0003	1.03842	1.02388	1.0027	1.01319	1.02737	1.00652	1.0539	1.10241	1.05475	1.04739	1.00672	0.996207	1.00511	1.04687	1.03241	1.00965	1.04812	0.99372	1.02327	1.02624	0.983931	1.014	1.00471	1.02624	0.997104	1.03221	1.02194	0.984029	0.989258	1.01603	1.0028	0.994217	0.985408	0.982652	1.00823	1.02501	1.08806	1.0031	1.0009	0.986788	1.0144	0.993819	1.02173	1.00692	1.0031
149	chr1	82290105	82880592	1.0003	1.03842	1.02388	1.0027	1.01319	1.02737	1.00652	1.0539	1.10241	1.05475	1.04739	1.00672	0.996207	1.00511	1.04687	1.03241	1.00965	1.04812	0.99372	1.02327	1.02624	0.983931	1.014	1.00471	1.02624	0.997104	1.03221	1.02194	0.984029	0.989258	1.01603	1.0028	0.994217	0.985408	0.982652	1.00823	1.02501	1.08806	1.0031	1.0009	0.986788	1.0144	0.993819	1.02173	1.00692	1.0031
150	chr1	82880593	83494495	1.0003	1.03842	1.02388	1.0027	1.01319	1.02737	1.00652	1.0539	1.10241	1.05475	1.04739	1.00672	0.996207	1.00511	1.04687	1.03241	1.00965	1.04812	0.99372	1.02327	1.02624	0.983931	1.014	1.00471	1.02624	0.997104	1.03221	1.02194	0.984029	0.989258	1.01603	1.0028	0.994217	0.985408	0.982652	1.00823	1.02501	1.08806	1.0031	1.0009	0.986788	1.0144	0.993819	1.02173	1.00692	1.0031
151	chr1	83494496	84076510	1.0003	1.03842	1.02388	1.0027	1.01319	1.02737	1.00652	1.0539	1.10241	1.05475	1.04739	1.00672	0.996207	1.00511	1.04687	1.03241	1.00965	1.04812	0.99372	1.02327	1.02624	0.983931	1.014	1.00471	1.02624	0.997104	1.03221	1.02194	0.984029	0.989258	1.01603	1.0028	0.994217	0.985408	0.982652	1.00823	1.02501	1.08806	1.0031	1.0009	0.986788	1.0144	0.993819	1.02173	1.00692	1.0031
152	chr1	84076511	84674563	1.0003	1.03842	1.02388	1.0027	1.01319	1.02737	1.00652	1.0539	1.10241	1.05475	1.04739	1.00672	0.996207	1.00511	1.04687	1.03241	1.00965	1.04812	0.99372	1.02327	1.02624	0.983931	1.014	1.00471	1.02624	0.997104	1.03221	1.02194	0.984029	0.989258	1.01603	1.0028	0.994217	0.985408	0.982652	1.00823	1.02501	1.08806	1.0031	1.0009	0.986788	1.0144	0.993819	1.02173	1.00692	1.0031
153	chr1	84674564	85228907	1.0003	1.03842	1.02388	1.0027	1.01319	1.02737	1.00652	1.0539	1.10241	1.05475	1.04739	1.00672	0.996207	1.00511	1.04687	1.03241	1.00965	1.04812	0.99372	1.02327	1.02624	0.983931	1.014	1.00471	1.02624	0.997104	1.03221	1.02194	0.984029	0.989258	1.01603	1.0028	0.994217	0.985408	0.982652	1.00823	1.02501	1.08806	1.0031	1.0009	0.986788	1.0144	0.993819	1.02173	1.00692	1.0031
154	chr1	85228908	85760592	1.0003	1.03842	1.02388	1.0027	1.01319	1.02737	1.00652	1.0539	1.10241	1.05475	1.04739	1.00672	0.996207	1.00511	1.04687	1.03241	1.00965	1.04812	0.99372	1.02327	1.02624	0.983931	1.014	1.00471	1.02624	0.997104	1.03221	1.02194	0.984029	0.989258	1.01603	1.0028	0.994217	0.985408	0.982652	1.00823	1.02501	1.08806	1.0031	1.0009	0.986788	1.0144	0.993819	1.02173	1.00692	1.0031
155	chr1	85760593	86335646	1.0003	1.03842	1.02388	1.0027	1.01319	1.02737	1.00652	1.0539	1.10241	1.05475	1.04739	1.00672	0.996207	1.00511	1.04687	1.03241	1.00965	1.04812	0.99372	1.02327	1.02624	0.983931	1.014	1.00471	1.02624	0.997104	1.03221	1.02194	0.984029	0.989258	1.01603	1.0028	0.994217	0.985408	0.982652	1.00823	1.02501	1.08806	1.0031	1.0009	0.986788	1.0144	0.993819	1.02173	1.00692	1.0031
156	chr1	86335647	86956300	1.0003	1.03842	1.02388	1.0027	1.01319	1.02737	1.00652	1.0539	1.10241	1.05475	1.04739	1.00672	0.996207	1.00511	1.04687	1.03241	1.00965	1.04812	0.99372	1.02327	1.02624	0.983931	1.014	1.00471	1.02624	0.997104	1.03221	1.02194	0.984029	0.989258	1.01603	1.0028	0.994217	0.985408	0.982652	1.00823	1.02501	1.08806	1.0031	1.0009	0.986788	1.0144	0.993819	1.02173	1.00692	1.0031
157	chr1	86956301	87555322	1.0003	1.03842	1.02388	1.0027	1.01319	1.02737	1.00652	1.0539	1.10241	1.05475	1.04739	1.00672	0.996207	1.00511	1.04687	1.03241	1.00965	1.04812	0.99372	1.02327	1.02624	0.983931	1.014	1.00471	1.02624	0.997104	1.03221	1.02194	0.984029	0.989258	1.01603	1.0028	0.994217	0.985408	0.982652	1.00823	1.02501	1.08806	1.0031	1.0009	0.986788	1.0144	0.993819	1.02173	1.00692	1.0031
158	chr1	87555323	88076806	1.0003	1.03842	1.02388	1.0027	1.01319	1.02737	1.00652	1.0539	1.10241	1.05475	1.04739	1.00672	0.996207	1.00511	1.04687	1.03241	1.00965	1.04812	0.99372	1.02327	1.02624	0.983931	1.014	1.00471	1.02624	0.997104	1.03221	1.02194	0.984029	0.989258	1.01603	1.0028	0.994217	0.985408	0.982652	1.00823	1.02501	1.08806	1.0031	1.0009	0.986788	1.0144	0.993819	1.02173	1.00692	1.0031
159	chr1	88076807	88632427	1.0003	1.03842	1.02388	1.0027	1.01319	1.02737	1.00652	1.0539	1.10241	1.05475	1.04739	1.00672	0.996207	1.00511	1.04687	1.03241	1.00965	1.04812	0.99372	1.02327	1.02624	0.983931	1.014	1.00471	1.02624	0.997104	1.03221	1.02194	0.984029	0.989258	1.01603	1.0028	0.994217	0.985408	0.982652	1.00823	1.02501	1.08806	1.0031	1.0009	0.986788	1.0144	0.993819	1.02173	1.00692	1.0031
160	chr1	88632428	89234116	1.0003	1.03842	1.02388	1.0027	1.01319	1.02737	1.00652	1.0539	1.10241	1.05475	1.04739	1.00672	0.996207	1.00511	1.04687	1.03241	1.00965	1.04812	0.99372	1.02327	1.02624	0.983931	1.014	1.00471	1.02624	0.997104	1.03221	1.02194	0.984029	0.989258	1.01603	1.0028	0.994217	0.985408	0.982652	1.00823	1.02501	1.08806	1.0031	1.0009	0.986788	1.0144	0.993819	1.02173	1.00692	1.0031
161	chr1	89234117	89835964	1.0003	1.03842	1.02388	1.0027	1.01319	1.02737	1.00652	1.0539	1.10241	1.05475	1.04739	1.00672	0.996207	1.00511	1.04687	1.03241	1.00965	1.04812	0.99372	1.02327	1.02624	0.983931	1.014	1.00471	1.02624	0.997104	1.03221	1.02194	0.984029	0.989258	1.01603	1.0028	0.994217	0.985408	0.982652	1.00823	1.02501	1.08806	1.0031	1.0009	0.986788	1.0144	0.993819	1.02173	1.00692	1.0031
162	chr1	89835965	90417012	1.0003	1.03842	1.02388	1.0027	1.01319	1.02737	1.00652	1.0539	1.10241	1.05475	1.04739	1.00672	0.996207	1.00511	1.04687	1.03241	1.00965	1.04812	0.99372	1.02327	1.02624	0.983931	1.014	1.00471	1.02624	0.997104	1.03221	1.02194	0.984029	0.989258	1.01603	1.0028	0.994217	0.985408	0.982652	1.00823	1.02501	1.08806	1.0031	1.0009	0.986788	1.0144	0.993819	1.02173	1.00692	1.0031
163	chr1	90417013	90984240	1.0003	1.03842	1.02388	1.0027	1.01319	1.02737	1.00652	1.0539	1.10241	1.05475	1.04739	1.00672	0.996207	1.00511	1.04687	1.03241	1.00965	1.04812	0.99372	1.02327	1.02624	0.983931	1.014	1.00471	1.02624	0.997104	1.03221	1.02194	0.984029	0.989258	1.01603	1.0028	0.994217	0.985408	0.982652	1.00823	1.02501	1.08806	1.0031	1.0009	0.986788	1.0144	0.993819	1.02173	1.00692	1.0031
164	chr1	90984241	91590270	1.0003	1.03842	1.02388	1.0027	1.01319	1.02737	1.00652	1.0539	1.10241	1.05475	1.04739	1.00672	0.996207	1.00511	1.04687	1.03241	1.00965	1.04812	0.99372	1.02327	1.02624	0.983931	1.014	1.00471	1.02624	0.997104	1.03221	1.02194	0.984029	0.989258	1.01603	1.0028	0.994217	0.985408	0.982652	1.00823	1.02501	1.08806	1.0031	1.0009	0.986788	1.0144	0.993819	1.02173	1.00692	1.0031
165	chr1	91590271	92184429	1.0003	1.03842	1.02388	1.0027	1.01319	1.02737	1.00652	1.0539	1.10241	1.05475	1.04739	1.00672	0.996207	1.00511	1.04687	1.03241	1.00965	1.04812	0.99372	1.02327	1.02624	0.983931	1.014	1.00471	1.02624	0.997104	1.03221	1.02194	0.984029	0.989258	1.01603	1.0028	0.994217	0.985408	0.982652	1.00823	1.02501	1.08806	1.0031	1.0009	0.986788	1.0144	0.993819	1.02173	1.00692	1.0031
166	chr1	92184430	92781375	1.0003	1.03842	1.02388	1.0027	1.01319	1.02737	1.00652	1.0539	1.10241	1.05475	1.04739	1.00672	0.996207	1.00511	1.04687	1.03241	1.00965	1.04812	0.99372	1.02327	1.02624	0.983931	1.014	1.00471	1.02624	0.997104	1.03221	1.02194	0.984029	0.989258	1.01603	1.0028	0.994217	0.985408	0.982652	1.00823	1.02501	1.08806	1.0031	1.0009	0.986788	1.0144	0.993819	1.02173	1.00692	1.0031
167	chr1	92781376	93411980	1.0003	1.03842	1.02388	1.0027	1.01319	1.02737	1.00652	1.0539	1.10241	1.05475	1.04739	1.00672	0.996207	1.00511	1.04687	1.03241	1.00965	1.04812	0.99372	1.02327	1.02624	0.983931	1.014	1.00471	1.02624	0.997104	1.03221	1.02194	0.984029	0.989258	1.01603	1.0028	0.994217	0.985408	0.982652	1.00823	1.02501	1.08806	1.0031	1.0009	0.986788	1.0144	0.993819	1.02173	1.00692	1.0031
168	chr1	93411981	94022121	1.0003	1.03842	1.02388	1.0027	1.01319	1.02737	1.00652	1.0539	1.10241	1.05475	1.04739	1.00672	0.996207	1.00511	1.04687	1.03241	1.00965	1.04812	0.99372	1.02327	1.02624	0.983931	1.014	1.00471	1.02624	0.997104	1.03221	1.02194	0.984029	0.989258	1.01603	1.0028	0.994217	0.985408	0.982652	1.00823	1.02501	1.08806	1.0031	1.0009	0.986788	1.0144	0.993819	1.02173	1.00692	1.0031
169	chr1	94022122	94532104	1.0003	1.03842	1.02388	1.0027	1.01319	1.02737	1.00652	1.0539	1.10241	1.05475	1.04739	1.00672	0.996207	1.00511	1.04687	1.03241	1.00965	1.04812	0.99372	1.02327	1.02624	0.983931	1.014	1.00471	1.02624	0.997104	1.03221	1.02194	0.984029	0.989258	1.01603	1.0028	0.994217	0.985408	0.982652	1.00823	1.02501	1.08806	1.0031	1.0009	0.986788	1.0144	0.993819	1.02173	1.00692	1.0031
170	chr1	94532105	95085962	1.0003	1.03842	1.02388	1.0027	1.01319	1.02737	1.00652	1.0539	1.10241	1.05475	1.04739	1.00672	0.996207	1.00511	1.04687	1.03241	1.00965	1.04812	0.99372	1.02327	1.02624	0.983931	1.014	1.00471	1.02624	0.997104	1.03221	1.02194	0.984029	0.989258	1.01603	1.0028	0.994217	0.985408	0.982652	1.00823	1.02501	1.08806	1.0031	1.0009	0.986788	1.0144	0.993819	1.02173	1.00692	1.0031
171	chr1	95085963	95614269	1.0003	1.03842	1.02388	1.0027	1.01319	1.02737	1.00652	1.0539	1.10241	1.05475	1.04739	1.00672	0.996207	1.00511	1.04687	1.03241	1.00965	1.04812	0.99372	1.02327	1.02624	0.983931	1.014	1.00471	1.02624	0.997104	1.03221	1.02194	0.984029	0.989258	1.01603	1.0028	0.994217	0.985408	0.982652	1.00823	1.02501	1.08806	1.0031	1.0009	0.986788	1.0144	0.993819	1.02173	1.00692	1.0031
172	chr1	95614270	96185750	1.0003	1.03842	1.02388	1.0027	1.01319	1.02737	1.00652	1.0539	1.10241	1.05475	1.04739	1.00672	0.996207	1.00511	1.04687	1.03241	1.00965	1.04812	0.99372	1.02327	1.02624	0.983931	1.014	1.00471	1.02624	0.997104	1.03221	1.02194	0.984029	0.989258	1.01603	1.0028	0.994217	0.985408	0.982652	1.00823	1.02501	1.08806	1.0031	1.0009	0.986788	1.0144	0.993819	1.02173	1.00692	1.0031
173	chr1	96185751	96773407	1.0003	1.03842	1.02388	1.0027	1.01319	1.02737	1.00652	1.0539	1.10241	1.05475	1.04739	1.00672	0.996207	1.00511	1.04687	1.03241	1.00965	1.04812	0.99372	1.02327	1.02624	0.983931	1.014	1.00471	1.02624	0.997104	1.03221	1.02194	0.984029	0.989258	1.01603	1.0028	0.994217	0.985408	0.982652	1.00823	1.02501	1.08806	1.0031	1.0009	0.986788	1.0144	0.993819	1.02173	1.00692	1.0031
174	chr1	96773408	97369806	1.0003	1.03842	1.02388	1.0027	1.01319	1.02737	1.00652	1.0539	1.10241	1.05475	1.04739	1.00672	0.996207	1.00511	1.04687	1.03241	1.00965	1.04812	0.99372	1.02327	1.02624	0.983931	1.014	1.00471	1.02624	0.997104	1.03221	1.02194	0.984029	0.989258	1.01603	1.0028	0.994217	0.985408	0.982652	1.00823	1.02501	1.08806	1.0031	1.0009	0.986788	1.0144	0.993819	1.02173	1.00692	1.0031
175	chr1	97369807	97970896	1.0003	1.03842	1.02388	1.0027	1.01319	1.02737	1.00652	1.0539	1.10241	1.05475	1.04739	1.00672	0.996207	1.00511	1.04687	1.03241	1.00965	1.04812	0.99372	1.02327	1.02624	0.983931	1.014	1.00471	1.02624	0.997104	1.03221	1.02194	0.984029	0.989258	1.01603	1.0028	0.994217	0.985408	0.982652	1.00823	1.02501	1.08806	1.0031	1.0009	0.986788	1.0144	0.993819	1.02173	1.00692	1.0031
176	chr1	97970897	98578727	1.0003	1.03842	1.02388	1.0027	1.01319	1.02737	1.00652	1.0539	1.10241	1.05475	1.04739	1.00672	0.996207	1.00511	1.04687	1.03241	1.00965	1.04812	0.99372	1.02327	1.02624	0.983931	1.014	1.00471	1.02624	0.997104	1.03221	1.02194	0.984029	0.989258	1.01603	1.0028	0.994217	0.985408	0.982652	1.00823	1.02501	1.08806	1.0031	1.0009	0.986788	1.0144	0.993819	1.02173	1.00692	1.0031
177	chr1	98578728	99172535	1.0003	1.03842	1.02388	1.0027	1.01319	1.02737	1.00652	1.0539	1.10241	1.05475	1.04739	1.00672	0.996207	1.00511	1.04687	1.03241	1.00965	1.04812	0.99372	1.02327	1.02624	0.983931	1.014	1.00471	1.02624	0.997104	1.03221	1.02194	0.984029	0.989258	1.01603	1.0028	0.994217	0.985408	0.982652	1.00823	1.02501	1.08806	1.0031	1.0009	0.986788	1.0144	0.993819	1.02173	1.00692	1.0031
178	chr1	99172536	99790172	1.0003	1.03842	1.02388	1.0027	1.01319	1.02737	1.00652	1.0539	1.10241	1.05475	1.04739	1.00672	0.996207	1.00511	1.04687	1.03241	1.00965	1.04812	0.99372	1.02327	1.02624	0.983931	1.014	1.00471	1.02624	0.997104	1.03221	1.02194	0.984029	0.989258	1.01603	1.0028	0.994217	0.985408	0.982652	1.00823	1.02501	1.08806	1.0031	1.0009	0.986788	1.0144	0.993819	1.02173	1.00692	1.0031
179	chr1	99790173	100382303	1.0003	1.03842	1.02388	1.0027	1.01319	1.02737	1.00652	1.0539	1.10241	1.05475	1.04739	1.00672	0.996207	1.00511	1.04687	1.03241	1.00965	1.04812	0.99372	1.02327	1.02624	0.983931	1.014	1.00471	1.02624	0.997104	1.03221	1.02194	0.984029	0.989258	1.01603	1.0028	0.994217	0.985408	0.982652	1.00823	1.02501	1.08806	1.0031	1.0009	0.986788	1.0144	0.993819	1.02173	1.00692	1.0031
180	chr1	100382304	100970376	1.0003	1.03842	1.02388	1.0027	1.01319	1.02737	1.00652	1.0539	1.10241	1.05475	1.04739	1.00672	0.996207	1.00511	1.04687	1.03241	1.00965	1.04812	0.99372	1.02327	1.02624	0.983931	1.014	1.00471	1.02624	0.997104	1.03221	1.02194	0.984029	0.989258	1.01603	1.0028	0.994217	0.985408	0.982652	1.00823	1.02501	1.08806	1.0031	1.0009	0.986788	1.0144	0.993819	1.02173	1.00692	1.0031
181	chr1	100970377	101575036	1.0003	1.03842	1.02388	1.0027	1.01319	1.02737	1.00652	1.0539	1.10241	1.05475	1.04739	1.00672	0.996207	1.00511	1.04687	1.03241	1.00965	1.04812	0.99372	1.02327	1.02624	0.983931	1.014	1.00471	1.02624	0.997104	1.03221	1.02194	0.984029	0.989258	1.01603	1.0028	0.994217	0.985408	0.982652	1.00823	1.02501	1.08806	1.0031	1.0009	0.986788	1.0144	0.993819	1.02173	1.00692	1.0031
182	chr1	101575037	102162511	1.0003	1.03842	1.02388	1.0027	1.01319	1.02737	1.00652	1.0539	1.10241	1.05475	1.04739	1.00672	0.996207	1.00511	1.04687	1.03241	1.00965	1.04812	0.99372	1.02327	1.02624	0.983931	1.014	1.00471	1.02624	0.997104	1.03221	1.02194	0.984029	0.989258	1.01603	1.0028	0.994217	0.985408	0.982652	1.00823	1.02501	1.08806	1.0031	1.0009	0.986788	1.0144	0.993819	1.02173	1.00692	1.0031
183	chr1	102162512	102821319	1.0003	1.03842	1.02388	1.0027	1.01319	1.02737	1.00652	1.0539	1.10241	1.05475	1.04739	1.00672	0.996207	1.00511	1.04687	1.03241	1.00965	0.919523	0.99372	1.02327	1.02624	0.983931	1.014	1.00471	1.02624	0.997104	1.03221	1.02194	0.984029	0.989258	1.01603	1.0028	0.994217	0.985408	0.982652	1.00823	1.02501	1.08806	1.0031	1.0009	0.986788	1.0144	0.993819	1.02173	1.00692	1.0031
184	chr1	102821320	103522641	1.0003	1.03842	1.02388	1.0027	1.01319	1.02737	1.00652	1.0539	1.10241	1.05475	1.04739	1.00672	0.996207	1.00511	1.04687	1.03241	1.00965	0.919523	0.99372	1.02327	1.02624	0.983931	1.014	1.00471	1.02624	0.997104	1.03221	1.02194	0.984029	0.989258	1.01603	1.0028	0.994217	0.985408	0.982652	1.00823	1.02501	1.08806	1.0031	1.0009	0.986788	1.0144	0.993819	1.02173	1.00692	1.0031
185	chr1	103522642	104275074	1.0003	1.03842	1.02388	1.0027	1.01319	1.02737	1.00652	1.0539	1.10241	1.05475	1.04739	1.00672	0.996207	1.00511	1.04687	1.03241	1.00965	0.919523	0.99372	1.02327	1.02624	0.983931	1.014	1.00471	1.02624	0.997104	1.03221	1.02194	0.984029	0.989258	1.01603	1.0028	0.994217	0.985408	0.982652	1.00823	1.02501	1.08806	1.0031	1.0009	0.986788	1.0144	0.993819	1.02173	1.00692	1.0031
186	chr1	104275075	104935505	1.0003	1.03842	1.02388	1.0027	1.01319	1.02737	1.00652	1.0539	1.10241	1.05475	1.04739	1.00672	0.996207	1.00511	1.04687	1.03241	1.00965	0.919523	0.99372	1.02327	1.02624	0.983931	1.014	1.00471	1.02624	0.997104	1.03221	1.02194	0.984029	0.989258	1.01603	1.0028	0.994217	0.985408	0.982652	1.00823	1.02501	1.08806	1.0031	1.0009	0.986788	1.0144	0.993819	1.02173	1.00692	1.0031
187	chr1	104935506	105624180	1.0003	1.03842	1.02388	1.0027	1.01319	1.02737	1.00652	1.0539	1.10241	1.05475	1.04739	1.00672	0.996207	1.00511	1.04687	1.03241	1.00965	0.919523	0.99372	1.02327	1.02624	0.983931	1.014	1.00471	1.02624	0.997104	1.03221	1.02194	0.984029	0.989258	1.01603	1.0028	0.994217	0.985408	0.982652	1.00823	1.02501	1.08806	1.0031	1.0009	0.986788	1.0144	0.993819	1.02173	1.00692	1.0031
188	chr1	105624181	106333559	1.0003	1.03842	1.02388	1.0027	1.01319	1.02737	1.00652	1.0539	1.10241	1.05475	1.04739	1.00672	0.996207	1.00511	1.04687	1.03241	1.00965	0.919523	0.99372	1.02327	1.02624	0.983931	1.014	1.00471	1.02624	0.997104	1.03221	1.02194	0.984029	0.989258	1.01603	1.0028	0.994217	0.985408	0.982652	1.00823	1.02501	1.08806	1.0031	1.0009	0.986788	1.0144	0.993819	1.02173	1.00692	1.0031
189	chr1	106333560	107010452	1.0003	1.03842	1.02388	1.0027	1.01319	1.02737	1.00652	1.0539	1.10241	1.05475	1.04739	1.00672	0.996207	1.00511	1.04687	1.03241	1.00965	0.919523	0.99372	1.02327	1.02624	0.983931	1.014	1.00471	1.02624	0.997104	1.03221	1.02194	0.984029	0.989258	1.01603	1.0028	0.994217	0.985408	0.982652	1.00823	1.02501	1.08806	1.0031	1.0009	0.986788	1.0144	0.993819	1.02173	1.00692	1.0031
190	chr1	107010453	107647138	1.0003	1.03842	1.02388	1.0027	1.01319	1.02737	1.00652	1.0539	1.10241	1.05475	1.04739	1.00672	0.996207	1.00511	1.04687	1.03241	1.00965	0.919523	0.99372	1.02327	1.02624	0.983931	1.014	1.00471	1.02624	0.997104	1.03221	1.02194	0.984029	0.989258	1.01603	1.0028	0.994217	0.985408	0.982652	1.00823	1.02501	1.08806	1.0031	1.0009	0.986788	1.0144	0.993819	1.02173	1.00692	1.0031
191	chr1	107647139	108209610	1.0003	1.03842	1.02388	1.0027	1.01319	1.02737	1.00652	1.0539	1.10241	1.05475	1.04739	1.00672	0.996207	1.00511	1.04687	1.03241	1.00965	0.919523	0.99372	1.02327	1.02624	0.983931	1.014	1.00471	1.02624	0.997104	1.03221	1.02194	0.984029	0.989258	1.01603	1.0028	0.994217	0.985408	0.982652	1.00823	1.02501	1.08806	1.0031	1.0009	0.986788	1.0144	0.993819	1.02173	1.00692	1.0031
192	chr1	108209611	108790410	1.0003	1.03842	1.02388	1.0027	1.01319	1.02737	1.00652	1.0539	1.10241	1.05475	1.04739	1.00672	0.996207	1.00511	1.04687	1.03241	1.00965	0.919523	0.99372	1.02327	1.02624	0.983931	1.014	1.00471	1.02624	0.997104	1.03221	1.02194	0.984029	0.989258	1.01603	1.0028	0.994217	0.985408	0.982652	1.00823	1.02501	1.08806	1.0031	1.0009	0.986788	1.0144	0.993819	1.02173	1.00692	1.0031
193	chr1	108790411	109312955	1.0003	1.03842	1.02388	1.0027	1.01319	1.02737	1.00652	1.0539	1.10241	1.05475	1.04739	1.00672	0.996207	1.00511	1.04687	1.03241	1.00965	0.919523	0.99372	1.02327	1.02624	0.983931	1.014	1.00471	1.02624	0.997104	1.03221	1.02194	0.984029	0.989258	1.01603	1.0028	0.994217	0.985408	0.982652	1.00823	1.02501	1.08806	1.0031	1.0009	0.986788	1.0144	0.993819	1.02173	1.00692	1.0031
194	chr1	109312956	109881076	1.0003	1.03842	1.02388	1.0027	1.01319	1.02737	1.00652	1.0539	1.10241	1.05475	1.04739	1.00672	0.996207	1.00511	1.04687	1.03241	1.00965	0.919523	0.99372	1.02327	1.02624	0.983931	1.014	1.00471	1.02624	0.997104	1.03221	1.02194	0.984029	0.989258	1.01603	1.0028	0.994217	0.985408	0.982652	1.00823	1.02501	1.08806	1.0031	1.0009	0.986788	1.0144	0.993819	1.02173	1.00692	1.0031
195	chr1	109881077	110383595	1.0003	1.03842	1.02388	1.0027	1.01319	1.02737	1.00652	1.0539	1.10241	1.05475	1.04739	1.00672	0.996207	1.00511	1.04687	1.03241	1.00965	0.919523	0.99372	1.02327	1.02624	0.983931	1.014	1.00471	1.02624	0.997104	1.03221	1.02194	0.984029	0.989258	1.01603	1.0028	0.994217	0.985408	0.982652	1.00823	1.02501	1.08806	1.0031	1.0009	0.986788	1.0144	0.993819	1.02173	1.00692	1.0031
196	chr1	110383596	110886689	1.0003	1.03842	1.02388	1.0027	1.01319	1.02737	1.00652	1.0539	1.10241	1.05475	1.04739	1.00672	0.996207	1.00511	1.04687	1.03241	1.00965	0.919523	0.99372	1.02327	1.02624	0.983931	1.014	1.00471	1.02624	0.997104	1.03221	1.02194	0.984029	0.989258	1.01603	1.0028	0.994217	0.985408	0.982652	1.00823	1.02501	1.08806	1.0031	1.0009	0.986788	1.0144	0.993819	1.02173	1.00692	1.0031
197	chr1	110886690	111420648	1.0003	1.03842	1.02388	1.0027	1.01319	1.02737	1.00652	1.0539	1.10241	1.05475	1.04739	1.00672	0.996207	1.00511	1.04687	1.03241	1.00965	0.919523	0.99372	1.02327	1.02624	0.983931	1.014	1.00471	1.02624	0.997104	1.03221	1.02194	0.984029	0.989258	1.01603	1.0028	0.994217	0.985408	0.982652	1.00823	1.02501	1.08806	1.0031	1.0009	0.986788	1.0144	0.993819	1.02173	1.00692	1.0031
198	chr1	111420649	111996937	1.0003	1.03842	1.02388	1.0027	1.01319	1.02737	1.00652	1.0539	1.10241	1.05475	1.04739	1.00672	0.996207	1.00511	1.04687	1.03241	1.00965	0.919523	0.99372	1.02327	1.02624	0.983931	1.014	1.00471	1.02624	0.997104	1.03221	1.02194	0.984029	0.989258	1.01603	1.0028	0.994217	0.985408	0.982652	1.00823	1.02501	1.08806	1.0031	1.0009	0.986788	1.0144	0.993819	1.02173	1.00692	1.0031
199	chr1	111996938	112507588	1.0003	1.03842	1.02388	1.0027	1.01319	1.02737	1.00652	1.0539	1.10241	1.05475	1.04739	1.00672	0.996207	1.00511	1.04687	1.03241	1.00965	0.919523	0.99372	1.02327	1.02624	0.983931	1.014	1.00471	1.02624	0.997104	1.03221	1.02194	0.984029	0.989258	1.01603	1.0028	0.994217	0.985408	0.982652	1.00823	1.02501	1.08806	1.0031	1.0009	0.986788	1.0144	0.993819	1.02173	1.00692	1.0031
200	chr1	112507589	113064713	1.0003	1.03842	1.02388	1.0027	1.01319	1.02737	1.00652	1.0539	1.10241	1.05475	1.04739	1.00672	0.996207	1.00511	1.04687	1.03241	1.00965	0.919523	0.99372	1.02327	1.02624	0.983931	1.014	1.00471	1.02624	0.997104	1.03221	1.02194	0.984029	0.989258	1.01603	1.0028	0.994217	0.985408	0.982652	1.00823	1.02501	1.08806	1.0031	1.0009	0.986788	1.0144	0.993819	1.02173	1.00692	1.0031
201	chr1	113064714	113646617	1.0003	1.03842	1.02388	1.0027	1.01319	1.02737	1.00652	1.0539	1.10241	1.05475	1.04739	1.00672	0.996207	1.00511	1.04687	1.03241	1.00965	0.919523	0.99372	1.02327	1.02624	0.983931	1.014	1.00471	1.02624	0.997104	1.03221	1.02194	0.984029	0.989258	1.01603	1.0028	0.994217	0.985408	0.982652	1.00823	1.02501	1.08806	1.0031	1.0009	0.986788	1.0144	0.993819	1.02173	1.00692	1.0031
202	chr1	113646618	114246719	1.0003	1.03842	1.02388	1.0027	1.01319	1.02737	1.00652	1.0539	1.10241	1.05475	1.04739	1.00672	0.996207	1.00511	1.04687	1.03241	1.00965	0.919523	0.99372	1.02327	1.02624	0.983931	1.014	1.00471	1.02624	0.997104	1.03221	1.02194	0.984029	0.989258	1.01603	1.0028	0.994217	0.985408	0.982652	1.00823	1.02501	1.08806	1.0031	1.0009	0.986788	1.0144	0.993819	1.02173	1.00692	1.0031
203	chr1	114246720	114775197	1.0003	1.03842	1.02388	1.0027	1.01319	1.02737	1.00652	1.0539	1.10241	1.05475	1.04739	1.00672	0.996207	1.00511	1.04687	1.03241	1.00965	0.919523	0.99372	1.02327	1.02624	0.983931	1.014	1.00471	1.02624	0.997104	1.03221	1.02194	0.984029	0.989258	1.01603	1.0028	0.994217	0.985408	0.982652	1.00823	1.02501	1.08806	1.0031	1.0009	0.986788	1.0144	0.993819	1.02173	1.00692	1.0031
204	chr1	114775198	115369574	1.0003	1.03842	1.02388	1.0027	1.01319	1.02737	1.00652	1.0539	1.10241	1.05475	1.04739	1.00672	0.996207	1.00511	1.04687	1.03241	1.00965	0.919523	0.99372	1.02327	1.02624	0.983931	1.014	1.00471	1.02624	0.997104	1.03221	1.02194	0.984029	0.989258	1.01603	1.0028	0.994217	0.985408	0.982652	1.00823	1.02501	1.08806	1.0031	1.0009	0.986788	1.0144	0.993819	1.02173	1.00692	1.0031
205	chr1	115369575	115913808	1.0003	1.03842	1.02388	1.0027	1.01319	1.02737	1.00652	1.0539	1.10241	1.05475	1.04739	1.00672	0.996207	1.00511	1.04687	1.03241	1.00965	0.919523	0.99372	1.02327	1.02624	0.983931	1.014	1.00471	1.02624	0.997104	1.03221	1.02194	0.984029	0.989258	1.01603	1.0028	0.994217	0.985408	0.982652	1.00823	1.02501	1.08806	1.0031	1.0009	0.986788	1.0144	0.993819	1.02173	1.00692	1.0031
206	chr1	115913809	116452002	1.0003	1.03842	1.02388	1.0027	1.01319	1.02737	1.00652	1.0539	1.10241	1.05475	1.04739	1.00672	0.996207	1.00511	1.04687	1.03241	1.00965	0.919523	0.99372	1.02327	1.02624	0.983931	1.014	1.00471	1.02624	0.997104	1.03221	1.02194	0.984029	0.989258	1.01603	1.0028	0.994217	0.985408	0.982652	1.00823	1.02501	1.08806	1.0031	1.0009	0.986788	1.0144	0.993819	1.02173	1.00692	1.0031
207	chr1	116452003	117008723	1.0003	1.03842	1.02388	1.0027	1.01319	1.02737	1.00652	1.0539	1.10241	1.05475	1.04739	1.00672	0.996207	1.00511	1.04687	1.03241	1.00965	0.919523	0.99372	1.02327	1.02624	0.983931	1.014	1.00471	1.02624	0.997104	1.03221	1.02194	0.984029	0.989258	1.01603	1.0028	0.994217	0.985408	0.982652	1.00823	1.02501	1.08806	1.0031	1.0009	0.986788	1.0144	0.993819	1.02173	1.00692	1.0031
208	chr1	117008724	117543074	1.0003	1.03842	1.02388	1.0027	1.01319	1.02737	1.00652	1.0539	1.10241	1.05475	1.04739	1.00672	0.996207	1.00511	1.04687	1.03241	1.00965	0.919523	0.99372	1.02327	1.02624	0.983931	1.014	1.00471	1.02624	0.997104	1.03221	1.02194	0.984029	0.989258	1.01603	1.0028	0.994217	0.985408	0.982652	1.00823	1.02501	1.08806	1.0031	1.0009	0.986788	1.0144	0.993819	1.02173	1.00692	1.0031
209	chr1	117543075	118119076	1.0003	1.03842	1.02388	1.0027	1.01319	1.02737	1.00652	1.0539	1.10241	1.05475	1.04739	1.00672	0.996207	1.00511	1.04687	1.03241	1.00965	0.919523	0.99372	1.02327	1.02624	0.983931	1.014	1.00471	1.02624	0.997104	1.03221	1.02194	0.984029	0.989258	1.01603	1.0028	0.994217	0.985408	0.982652	1.00823	1.02501	1.08806	1.0031	1.0009	0.986788	1.0144	0.993819	1.02173	1.00692	1.0031
210	chr1	118119077	118650750	1.0003	1.03842	1.02388	1.0027	1.01319	1.02737	1.00652	1.0539	1.10241	1.05475	1.04739	1.00672	0.996207	1.00511	1.04687	1.03241	1.00965	0.919523	0.99372	1.02327	1.02624	0.983931	1.014	1.00471	1.02624	0.997104	1.03221	1.02194	0.984029	0.989258	1.01603	1.0028	0.994217	0.985408	0.982652	1.00823	1.02501	1.08806	1.0031	1.0009	0.986788	1.0144	0.993819	1.02173	1.00692	1.0031
211	chr1	118650751	119235421	1.0003	1.03842	1.02388	1.0027	1.01319	1.02737	1.00652	1.0539	1.10241	1.05475	1.04739	1.00672	0.996207	1.00511	1.04687	1.03241	1.00965	0.919523	0.99372	1.02327	1.02624	0.983931	1.014	1.00471	1.02624	0.997104	1.03221	1.02194	0.984029	0.989258	1.01603	1.0028	0.994217	0.985408	0.982652	1.00823	1.02501	1.08806	1.0031	1.0009	0.986788	1.0144	0.993819	1.02173	1.00692	1.0031
212	chr1	119235422	119819469	1.0003	1.03842	1.02388	1.0027	1.01319	1.02737	1.00652	1.0539	1.10241	1.05475	1.04739	1.00672	0.996207	1.00511	1.04687	1.03241	1.00965	0.919523	0.99372	1.02327	1.02624	0.983931	1.014	1.00471	1.02624	0.997104	1.03221	1.02194	0.984029	0.989258	1.01603	1.0028	0.994217	0.985408	0.982652	1.00823	1.02501	1.08806	1.0031	1.0009	0.986788	1.0144	0.993819	1.02173	1.00692	1.0031
213	chr1	119819470	120368499	1.0003	1.03842	1.02388	1.0027	1.01319	1.02737	1.00652	1.0539	1.10241	1.05475	1.04739	1.00672	0.996207	1.00511	1.04687	1.03241	1.00965	0.919523	0.99372	1.02327	1.02624	0.983931	1.014	1.00471	1.02624	0.997104	1.03221	1.02194	0.984029	0.989258	1.01603	1.0028	0.994217	0.985408	0.982652	1.00823	1.02501	1.08806	1.0031	1.0009	0.986788	1.0144	0.993819	1.02173	1.00692	1.0031
214	chr1	120368500	120677830	1.0003	1.03842	1.02388	1.0027	1.01319	1.02737	1.00652	1.0539	1.10241	1.05475	1.04739	1.00672	0.996207	1.00511	1.04687	1.03241	1.00965	0.919523	0.99372	1.02327	1.02624	0.983931	1.014	1.00471	1.02624	0.997104	1.03221	1.02194	0.984029	0.989258	1.01603	1.0028	0.994217	0.985408	0.982652	1.00823	1.02501	1.08806	1.0031	1.0009	0.986788	1.0144	0.993819	1.02173	1.00692	1.0031
215	chr1	120677831	121247629	1.0003	1.03842	1.02388	1.0027	1.01319	1.02737	1.00652	1.0539	1.10241	1.05475	1.04739	1.00672	0.996207	1.00511	1.04687	1.03241	1.00965	0.919523	0.99372	1.02327	1.02624	0.983931	1.014	1.00471	1.02624	0.997104	1.03221	1.02194	0.984029	0.989258	1.01603	1.0028	0.994217	0.985408	0.982652	1.00823	1.02501	1.08806	1.0031	1.0009	0.986788	1.0144	0.993819	1.02173	1.00692	1.0031
216	chr1	121247630	121484735	1.0003	1.03842	1.02388	1.0027	1.01319	1.02737	1.00652	1.0539	1.10241	1.05475	1.04739	1.00672	2.32938	1.00511	1.04687	1.03241	1.00965	0.919523	0.99372	1.02327	1.02624	0.983931	1.014	1.00471	1.02624	1.94371	1.03221	1.02194	0.984029	0.989258	1.01603	1.0028	1.90656	0.985408	0.982652	1.00823	1.02501	1.08806	2.00872	1.0009	0.986788	1.0144	2.19899	1.02173	1.00692	1.90904
217	chr1	121484736	142551914	1.0003	1.03842	1.02388	1.0027	1.01319	1.02737	1.00652	1.0539	1.10241	1.05475	1.04739	1.00672	2.32938	1.00511	1.04687	1.03241	1.00965	0.919523	0.99372	1.02327	1.02624	0.983931	1.014	1.00471	1.02624	1.94371	1.03221	1.02194	0.984029	0.989258	1.01603	1.0028	1.90656	0.985408	0.982652	1.00823	1.02501	1.08806	2.00872	1.0009	0.986788	1.0144	2.19899	1.02173	1.00692	1.90904
218	chr1	142551915	142803208	1.0003	1.03842	1.02388	1.0027	1.01319	1.02737	1.00652	1.0539	1.10241	1.05475	1.04739	1.00672	0.997703	1.00511	1.04687	1.03241	1.00965	0.919523	0.99372	1.02327	1.02624	0.983931	1.014	1.00471	1.02624	1.00783	1.03221	1.02194	0.984029	0.989258	1.01603	1.0028	0.986393	0.985408	0.982652	1.00823	1.02501	1.08806	0.994714	1.0009	0.986788	1.0144	1.01837	1.02173	1.00692	1.00351
219	chr1	142803209	142955990	1.0003	1.03842	1.02388	1.0027	1.01319	1.02737	1.00652	1.0539	1.10241	1.05475	1.04739	1.00672	0.997703	1.00511	1.04687	1.03241	1.00965	0.919523	0.99372	1.02327	1.02624	0.983931	1.014	1.00471	1.02624	1.00783	1.03221	1.02194	0.984029	0.989258	1.01603	1.0028	0.986393	0.985408	0.982652	1.00823	1.02501	1.08806	0.994714	1.0009	0.986788	1.0144	1.01837	1.02173	1.00692	1.00351
220	chr1	142955991	143394308	1.0003	1.03842	1.02388	1.0027	1.01319	1.02737	1.00652	1.0539	1.10241	1.05475	1.04739	1.00672	0.997703	1.00511	1.04687	1.03241	1.00965	0.919523	0.99372	1.02327	1.02624	0.983931	1.014	1.00471	1.02624	1.00783	1.03221	1.02194	0.984029	0.989258	1.01603	1.0028	0.986393	0.985408	0.982652	1.00823	1.02501	1.08806	0.994714	1.0009	0.986788	1.0144	1.01837	1.02173	1.00692	1.00351
221	chr1	143394309	143919182	1.0003	1.03842	1.02388	1.0027	1.01319	1.02737	1.00652	1.0539	1.10241	1.05475	1.04739	1.00672	0.997703	1.00511	1.04687	1.03241	1.00965	0.919523	0.99372	1.02327	1.02624	0.983931	1.014	1.00471	1.02624	1.00783	1.03221	1.02194	0.984029	0.989258	1.01603	1.0028	0.986393	0.985408	0.982652	1.00823	1.02501	1.08806	0.994714	1.0009	0.986788	1.0144	1.01837	1.02173	1.00692	1.00351
222	chr1	143919183	144381013	1.0003	1.03842	1.02388	1.0027	1.01319	1.02737	1.00652	1.0539	0.92895	1.05475	1.04739	1.00672	0.997703	1.00511	1.04687	1.03241	1.00965	0.919523	0.99372	1.02327	1.02624	0.983931	1.014	1.00471	1.02624	1.00783	1.03221	1.02194	0.984029	0.989258	1.01603	1.0028	0.986393	0.985408	0.982652	1.00823	1.02501	1.08806	0.994714	1.0009	0.986788	1.0144	1.01837	1.02173	1.00692	1.00351
223	chr1	144381014	144891764	1.0003	1.03842	1.02388	1.0027	1.01319	1.02737	1.00652	1.0539	0.92895	1.05475	1.04739	1.00672	0.997703	1.00511	1.04687	1.03241	1.00965	0.919523	0.99372	1.02327	1.02624	0.983931	1.014	1.00471	1.02624	1.00783	1.03221	1.02194	0.984029	0.989258	1.01603	1.0028	0.986393	0.985408	0.982652	1.00823	1.02501	1.08806	0.994714	1.0009	0.986788	1.0144	1.01837	1.02173	1.00692	1.00351
224	chr1	144891765	145075864	1.0003	1.03842	1.02388	1.0027	1.01319	1.02737	1.00652	1.0539	0.92895	1.05475	1.04739	1.00672	0.997703	1.00511	1.04687	1.03241	1.00965	0.919523	0.99372	1.02327	1.02624	0.983931	1.014	1.00471	1.02624	1.00783	1.03221	1.02194	0.984029	0.989258	1.01603	1.0028	0.986393	0.985408	0.982652	1.00823	1.02501	1.08806	0.994714	1.0009	0.986788	1.0144	1.01837	1.02173	1.00692	1.00351
225	chr1	145075865	145270683	1.0003	1.03842	1.02388	1.0027	1.01319	1.02737	1.00652	1.0539	0.92895	1.05475	1.04739	1.00672	0.997703	1.00511	1.04687	1.03241	1.00965	0.919523	0.99372	1.02327	1.02624	0.983931	1.014	1.00471	1.02624	1.00783	1.03221	1.02194	0.984029	0.989258	1.01603	1.0028	0.986393	0.985408	0.982652	1.00823	1.02501	1.08806	0.994714	1.0009	0.986788	1.0144	1.01837	1.02173	1.00692	1.00351
226	chr1	145270684	145701590	1.0003	1.03842	1.02388	1.0027	1.01319	1.02737	1.00652	1.0539	0.92895	1.05475	1.04739	1.00672	0.997703	1.00511	1.04687	1.03241	1.00965	0.919523	0.99372	1.02327	1.02624	0.983931	1.014	1.00471	1.02624	1.00783	1.03221	1.02194	0.984029	0.989258	1.01603	1.0028	0.986393	0.985408	0.982652	1.00823	1.02501	1.08806	0.994714	1.0009	0.986788	1.0144	1.01837	1.02173	1.00692	1.00351
227	chr1	145701591	146228446	1.0003	1.03842	1.02388	1.0027	1.01319	1.02737	1.00652	1.0539	0.92895	1.05475	1.04739	1.00672	0.997703	1.00511	1.04687	1.03241	1.00965	0.919523	0.99372	1.02327	1.02624	0.983931	1.014	1.00471	1.02624	1.00783	1.03221	1.02194	0.984029	0.989258	1.01603	1.0028	0.986393	0.985408	0.982652	1.00823	1.02501	1.08806	0.994714	1.0009	0.986788	1.0144	1.01837	1.02173	1.00692	1.00351
228	chr1	146228447	146872036	1.0003	1.03842	1.02388	1.0027	1.01319	1.02737	1.00652	1.0539	0.92895	1.05475	1.04739	1.00672	0.997703	1.00511	1.04687	1.03241	1.00965	0.919523	0.99372	1.02327	1.02624	0.983931	1.014	1.00471	1.02624	1.00783	1.03221	1.02194	0.984029	0.989258	1.01603	1.0028	0.986393	0.985408	0.982652	1.00823	1.02501	1.08806	0.994714	1.0009	0.986788	1.0144	1.01837	1.02173	1.00692	1.00351
229	chr1	146872037	147416456	1.0003	1.03842	1.02388	1.0027	1.01319	1.02737	1.00652	1.0539	0.92895	1.05475	1.04739	1.00672	0.997703	1.00511	1.04687	1.03241	1.00965	0.919523	0.99372	1.02327	1.02624	0.983931	1.014	1.00471	1.02624	1.00783	1.03221	1.02194	0.984029	0.989258	1.01603	1.0028	0.986393	0.985408	0.982652	1.00823	1.02501	1.08806	0.994714	1.0009	0.986788	1.0144	1.01837	1.02173	1.00692	1.00351
230	chr1	147416457	147894833	1.0003	1.03842	1.02388	1.0027	1.01319	1.02737	1.00652	1.0539	0.92895	1.05475	1.04739	1.00672	0.997703	1.00511	1.04687	1.03241	1.00965	0.919523	0.99372	1.02327	1.02624	0.983931	1.014	1.00471	1.02624	1.00783	1.03221	1.02194	0.984029	0.989258	1.01603	1.0028	0.986393	0.985408	0.982652	1.00823	1.02501	1.08806	0.994714	1.0009	0.986788	1.0144	1.01837	1.02173	1.00692	1.00351
231	chr1	147894834	148584795	1.0003	1.03842	1.02388	1.0027	1.01319	1.02737	1.00652	1.0539	0.92895	1.05475	1.04739	1.00672	0.997703	1.00511	1.04687	1.03241	1.00965	0.919523	0.99372	1.02327	1.02624	0.983931	1.014	1.00471	1.02624	1.00783	1.03221	1.02194	0.984029	0.989258	1.01603	1.0028	0.986393	0.985408	0.982652	1.00823	1.02501	1.08806	0.994714	1.0009	0.986788	1.0144	1.01837	1.02173	1.00692	1.00351
232	chr1	148584796	148897381	1.0003	1.03842	1.02388	1.0027	1.01319	1.02737	1.00652	1.0539	0.92895	1.05475	1.04739	1.00672	0.997703	1.00511	1.04687	1.03241	1.00965	0.919523	0.99372	1.02327	1.02624	0.983931	1.014	1.00471	1.02624	1.00783	1.03221	1.02194	0.984029	0.989258	1.01603	1.0028	0.986393	0.985408	0.982652	1.00823	1.02501	1.08806	0.994714	1.0009	0.986788	1.0144	1.01837	1.02173	1.00692	1.00351
233	chr1	148897382	149285620	1.0003	1.03842	1.02388	1.0027	1.01319	1.02737	1.00652	1.0539	0.92895	1.05475	1.04739	1.00672	0.997703	1.00511	1.04687	1.03241	1.00965	0.919523	0.99372	1.02327	1.02624	0.983931	1.014	1.00471	1.02624	1.00783	1.03221	1.02194	0.984029	0.989258	1.01603	1.0028	0.986393	0.985408	0.982652	1.00823	1.02501	1.08806	0.994714	1.0009	0.986788	1.0144	1.01837	1.02173	1.00692	1.00351
234	chr1	149285621	149695848	1.0003	1.03842	1.02388	1.0027	1.01319	1.02737	1.00652	1.0539	0.92895	1.05475	1.04739	1.00672	0.997703	1.00511	1.04687	1.03241	1.00965	0.919523	0.99372	1.02327	1.02624	0.983931	1.014	1.00471	1.02624	1.00783	1.03221	1.02194	0.984029	0.989258	1.01603	1.0028	0.986393	0.985408	0.982652	1.00823	1.02501	1.08806	0.994714	1.0009	0.986788	1.0144	1.01837	1.02173	1.00692	1.00351
235	chr1	149695849	150167229	1.0003	1.03842	1.02388	1.0027	1.01319	1.02737	1.00652	1.0539	0.92895	1.05475	1.04739	1.00672	0.997703	1.00511	1.04687	1.03241	1.00965	0.919523	0.99372	1.02327	1.02624	0.983931	1.014	1.00471	1.02624	1.00783	1.03221	1.02194	0.984029	0.989258	1.01603	1.0028	0.986393	0.985408	0.982652	1.00823	1.02501	1.08806	0.994714	1.0009	0.986788	1.0144	1.01837	1.02173	1.00692	1.00351
236	chr1	150167230	150733233	1.0003	1.03842	1.02388	1.0027	1.01319	1.02737	1.00652	1.0539	0.92895	1.05475	1.04739	1.00672	0.997703	1.00511	1.04687	1.03241	1.00965	0.919523	0.99372	1.02327	1.02624	0.983931	1.014	1.00471	1.02624	1.00783	1.03221	1.02194	0.984029	0.989258	1.01603	1.0028	0.986393	0.985408	0.982652	1.00823	1.02501	1.08806	0.994714	1.0009	0.986788	1.0144	1.01837	1.02173	1.00692	1.00351
237	chr1	150733234	151288955	1.0003	1.03842	1.02388	1.0027	1.01319	1.02737	1.00652	1.0539	0.92895	1.05475	1.04739	1.00672	0.997703	1.00511	1.04687	1.03241	1.00965	0.919523	0.99372	1.02327	1.02624	0.983931	1.014	1.00471	1.02624	1.00783	1.03221	1.02194	0.984029	0.989258	1.01603	1.0028	0.986393	0.985408	0.982652	1.00823	1.02501	1.08806	0.994714	1.0009	0.986788	1.0144	1.01837	1.02173	1.00692	1.00351
238	chr1	151288956	151831754	1.0003	1.03842	1.02388	1.0027	1.01319	1.02737	1.00652	1.0539	0.92895	1.05475	1.04739	1.00672	0.997703	1.00511	1.04687	1.03241	1.00965	0.919523	0.99372	1.02327	1.02624	0.983931	1.014	1.00471	1.02624	1.00783	1.03221	1.02194	0.984029	0.989258	1.01603	1.0028	0.986393	0.985408	0.982652	1.00823	1.02501	1.08806	0.994714	1.0009	0.986788	1.0144	1.01837	1.02173	1.00692	1.00351
239	chr1	151831755	152420834	1.0003	1.03842	1.02388	1.0027	1.01319	1.02737	1.00652	1.0539	0.92895	1.05475	1.04739	1.00672	0.997703	1.00511	1.04687	1.03241	1.00965	0.919523	0.99372	1.02327	1.02624	0.983931	1.014	1.00471	1.02624	1.00783	1.03221	1.02194	0.984029	0.989258	1.01603	1.0028	0.986393	0.985408	0.982652	1.00823	1.02501	1.08806	0.994714	1.0009	0.986788	1.0144	1.01837	1.02173	1.00692	1.00351
240	chr1	152420835	153003251	1.0003	1.03842	1.02388	1.0027	1.01319	1.02737	1.00652	1.0539	0.92895	1.05475	1.04739	1.00672	0.997703	1.00511	1.04687	1.03241	1.00965	0.919523	0.99372	1.02327	1.02624	0.983931	1.014	1.00471	1.02624	1.00783	1.03221	1.02194	0.984029	0.989258	1.01603	1.0028	0.986393	0.985408	0.982652	1.00823	1.02501	1.08806	0.994714	1.0009	0.986788	1.0144	1.01837	1.02173	1.00692	1.00351
241	chr1	153003252	153558846	1.0003	1.03842	1.02388	1.0027	1.01319	1.02737	1.00652	1.0539	0.92895	1.05475	1.04739	1.00672	0.997703	1.00511	1.04687	1.03241	1.00965	0.919523	0.99372	1.02327	1.02624	0.983931	1.014	1.00471	1.02624	1.00783	1.03221	1.02194	0.984029	0.989258	1.01603	1.0028	0.986393	0.985408	0.982652	1.00823	1.02501	1.08806	0.994714	1.0009	0.986788	1.0144	1.01837	1.02173	1.00692	1.00351
242	chr1	153558847	154128572	1.0003	1.03842	1.02388	1.0027	1.01319	1.02737	1.00652	1.0539	0.92895	1.05475	1.04739	1.00672	0.997703	1.00511	1.04687	1.03241	1.00965	0.919523	0.99372	1.02327	1.02624	0.983931	1.014	1.00471	1.02624	1.00783	1.03221	1.02194	0.984029	0.989258	1.01603	1.0028	0.986393	0.985408	0.982652	1.00823	1.02501	1.08806	0.994714	1.0009	0.986788	1.0144	1.01837	1.02173	1.00692	1.00351
243	chr1	154128573	154672094	1.0003	1.03842	1.02388	1.0027	1.01319	1.02737	1.00652	1.0539	0.92895	1.05475	1.04739	1.00672	0.997703	1.00511	1.04687	1.03241	1.00965	0.919523	0.99372	1.02327	1.02624	0.983931	1.014	1.00471	1.02624	1.00783	1.03221	1.02194	0.984029	0.989258	1.01603	1.0028	0.986393	0.985408	0.982652	1.00823	1.02501	1.08806	0.994714	1.0009	0.986788	1.0144	1.01837	1.02173	1.00692	1.00351
244	chr1	154672095	155179058	1.0003	1.03842	1.02388	1.0027	1.01319	1.02737	1.00652	1.0539	0.92895	1.05475	1.04739	1.00672	0.997703	1.00511	1.04687	1.03241	1.00965	0.919523	0.99372	1.02327	1.02624	0.983931	1.014	1.00471	1.02624	1.00783	1.03221	1.02194	0.984029	0.989258	1.01603	1.0028	0.986393	0.985408	0.982652	1.00823	1.02501	1.08806	0.994714	1.0009	0.986788	1.0144	1.01837	1.02173	1.00692	1.00351
245	chr1	155179059	155732175	1.0003	1.03842	1.02388	1.0027	1.01319	1.02737	1.00652	1.0539	0.92895	1.05475	1.04739	1.00672	0.997703	1.00511	1.04687	1.03241	1.00965	0.919523	0.99372	1.02327	1.02624	0.983931	1.014	1.00471	1.02624	1.00783	1.03221	1.02194	0.984029	0.989258	1.01603	1.0028	0.986393	0.985408	0.982652	1.00823	1.02501	1.08806	0.994714	1.0009	0.986788	1.0144	1.01837	1.02173	1.00692	1.00351
246	chr1	155732176	156290015	1.0003	1.03842	1.02388	1.0027	1.01319	1.02737	1.00652	1.0539	0.92895	1.05475	1.04739	1.00672	0.997703	1.00511	1.04687	1.03241	1.00965	0.919523	0.99372	1.02327	1.02624	0.983931	1.014	1.00471	1.02624	1.00783	1.03221	1.02194	0.984029	0.989258	1.01603	1.0028	0.986393	0.985408	0.982652	1.00823	1.02501	1.08806	0.994714	1.0009	0.986788	1.0144	1.01837	1.02173	1.00692	1.00351
247	chr1	156290016	156834759	1.0003	1.03842	1.02388	1.0027	1.01319	1.02737	1.00652	1.0539	0.92895	1.05475	1.04739	1.00672	0.997703	1.00511	1.04687	1.03241	1.00965	0.919523	0.99372	1.02327	1.02624	0.983931	1.014	1.00471	1.02624	1.00783	1.03221	1.02194	0.984029	0.989258	1.01603	1.0028	0.986393	0.985408	0.982652	1.00823	1.02501	1.08806	0.994714	1.0009	0.986788	1.0144	1.01837	1.02173	1.00692	1.00351
248	chr1	156834760	157371633	1.0003	1.03842	1.02388	1.0027	1.01319	1.02737	1.00652	1.0539	0.92895	1.05475	1.04739	1.00672	0.997703	1.00511	1.04687	1.03241	1.00965	0.919523	0.99372	1.02327	1.02624	0.983931	1.014	1.00471	1.02624	1.00783	1.03221	1.02194	0.984029	0.989258	1.01603	1.0028	0.986393	0.985408	0.982652	1.00823	1.02501	1.08806	0.994714	1.0009	0.986788	1.0144	1.01837	1.02173	1.00692	1.00351
249	chr1	157371634	157952229	1.0003	1.03842	1.02388	1.0027	1.01319	1.02737	1.00652	1.0539	0.92895	1.05475	1.04739	1.00672	0.997703	1.00511	1.04687	1.03241	1.00965	0.919523	0.99372	1.02327	1.02624	0.983931	1.014	1.00471	1.02624	1.00783	1.03221	1.02194	0.984029	0.989258	1.01603	1.0028	0.986393	0.985408	0.982652	1.00823	1.02501	1.08806	0.994714	1.0009	0.986788	1.0144	1.01837	1.02173	1.00692	1.00351
250	chr1	157952230	158546027	1.0003	1.03842	1.02388	1.0027	1.01319	1.02737	1.00652	1.0539	0.92895	1.05475	1.04739	1.00672	1.21823	1.00511	1.04687	1.03241	1.00965	0.919523	0.99372	1.02327	1.02624	0.983931	1.014	1.00471	1.02624	1.00783	1.03221	1.02194	0.984029	0.989258	1.01603	1.0028	0.986393	0.985408	0.982652	1.00823	1.02501	1.08806	0.994714	1.0009	0.986788	1.0144	1.01837	1.02173	1.00692	1.00351
251	chr1	158546028	159163913	1.0003	1.03842	1.02388	1.0027	1.01319	1.02737	1.00652	1.0539	0.92895	1.05475	1.04739	1.00672	1.21823	1.00511	1.04687	1.03241	1.00965	0.919523	0.99372	1.02327	1.02624	0.983931	1.014	1.00471	1.02624	1.00783	1.03221	1.02194	0.984029	0.989258	1.01603	1.0028	0.986393	0.985408	0.982652	1.00823	1.02501	1.08806	0.994714	1.0009	0.986788	1.0144	1.01837	1.02173	1.00692	1.00351
252	chr1	159163914	159772952	1.0003	1.03842	1.02388	1.0027	1.01319	1.02737	1.00652	1.0539	0.92895	1.05475	1.04739	1.00672	1.21823	1.00511	1.04687	1.03241	1.00965	0.919523	0.99372	1.02327	1.02624	0.983931	1.014	1.00471	1.02624	1.00783	1.03221	1.02194	0.984029	0.989258	1.01603	1.0028	0.986393	0.985408	0.982652	1.00823	1.02501	1.08806	0.994714	1.0009	0.986788	1.0144	1.01837	1.02173	1.00692	1.00351
253	chr1	159772953	160280508	1.0003	1.03842	1.02388	1.0027	1.01319	1.02737	1.00652	1.0539	0.92895	1.05475	1.04739	1.00672	1.21823	1.00511	1.04687	1.03241	1.00965	0.919523	0.99372	1.02327	1.02624	0.983931	1.014	1.00471	1.02624	1.00783	1.03221	1.02194	0.984029	0.989258	1.01603	1.0028	0.986393	0.985408	0.982652	1.00823	1.02501	1.08806	0.994714	1.0009	0.986788	1.0144	1.01837	1.02173	1.00692	1.00351
254	chr1	160280509	160833078	1.0003	1.03842	1.02388	1.0027	1.01319	1.02737	1.00652	1.0539	0.92895	1.05475	1.04739	1.00672	1.21823	1.00511	1.04687	1.03241	1.00965	0.919523	0.99372	1.02327	1.02624	0.983931	1.014	1.00471	1.02624	1.00783	1.03221	1.02194	0.984029	0.989258	1.01603	1.0028	0.986393	0.985408	0.982652	1.00823	1.02501	1.08806	0.994714	1.0009	0.986788	1.0144	1.01837	1.02173	1.00692	1.00351
255	chr1	160833079	161414670	1.0003	1.03842	1.02388	1.0027	1.01319	1.02737	1.00652	1.0539	0.92895	1.05475	1.04739	1.00672	1.21823	1.00511	1.04687	1.03241	1.00965	0.919523	0.99372	1.02327	1.02624	0.983931	1.014	1.00471	1.02624	1.00783	1.03221	1.02194	0.984029	0.989258	1.01603	1.0028	0.986393	0.985408	0.982652	1.00823	1.02501	1.08806	0.994714	1.0009	0.986788	1.0144	1.01837	1.02173	1.00692	1.00351
256	chr1	161414671	161885696	1.0003	1.03842	1.02388	1.0027	1.01319	1.02737	1.00652	1.0539	0.92895	1.05475	1.04739	1.00672	1.21823	1.00511	1.04687	1.03241	1.00965	0.919523	0.99372	1.02327	1.02624	0.983931	1.014	1.00471	1.02624	1.00783	1.03221	1.02194	0.984029	0.989258	1.01603	1.0028	0.986393	0.985408	0.982652	1.00823	1.02501	1.08806	0.994714	1.0009	0.986788	1.0144	1.01837	1.02173	1.00692	1.00351
257	chr1	161885697	162431275	1.0003	1.03842	1.02388	1.0027	1.01319	1.02737	1.00652	1.0539	0.92895	1.05475	1.04739	1.00672	1.21823	1.00511	1.04687	1.03241	1.00965	0.919523	0.99372	1.02327	1.02624	0.983931	1.014	1.00471	1.02624	1.00783	1.03221	1.02194	0.984029	0.989258	1.01603	1.0028	0.986393	0.985408	0.982652	1.00823	1.02501	1.08806	0.994714	1.0009	0.986788	1.0144	1.01837	1.02173	1.00692	1.00351
258	chr1	162431276	163004459	1.0003	1.03842	1.02388	1.0027	1.01319	1.02737	1.00652	1.0539	0.92895	1.05475	1.04739	1.00672	1.21823	1.00511	1.04687	1.03241	1.00965	0.919523	0.99372	1.02327	1.02624	0.983931	1.014	1.00471	1.02624	1.00783	1.03221	1.02194	0.984029	0.989258	1.01603	1.0028	0.986393	0.985408	0.982652	1.00823	1.02501	1.08806	0.994714	1.0009	0.986788	1.0144	1.01837	1.02173	1.00692	1.00351
259	chr1	163004460	163588000	1.0003	1.03842	1.02388	1.0027	1.01319	1.02737	1.00652	1.0539	0.92895	1.05475	1.04739	1.00672	1.21823	1.00511	1.04687	1.03241	1.00965	0.919523	0.99372	1.02327	1.02624	0.983931	1.014	1.00471	1.02624	1.00783	1.03221	1.02194	0.984029	0.989258	1.01603	1.0028	0.986393	0.985408	0.982652	1.00823	1.02501	1.08806	0.994714	1.0009	0.986788	1.0144	1.01837	1.02173	1.00692	1.00351
260	chr1	163588001	164196895	1.0003	1.03842	1.02388	1.0027	1.01319	1.02737	1.00652	1.0539	0.92895	1.05475	1.04739	1.00672	1.21823	1.00511	1.04687	1.03241	1.00965	0.919523	0.99372	1.02327	1.02624	0.983931	1.014	1.00471	1.02624	1.00783	1.03221	1.02194	0.984029	0.989258	1.01603	1.0028	0.986393	0.985408	0.982652	1.00823	1.02501	1.08806	0.994714	1.0009	0.986788	1.0144	1.01837	1.02173	1.00692	1.00351
261	chr1	164196896	164775077	1.0003	1.03842	1.02388	1.0027	1.01319	1.02737	1.00652	1.0539	0.92895	1.05475	1.04739	1.00672	1.21823	1.00511	1.04687	1.03241	1.00965	0.919523	0.99372	1.02327	1.02624	0.983931	1.014	1.00471	1.02624	1.00783	1.03221	1.02194	0.984029	0.989258	1.01603	1.0028	0.986393	0.985408	0.982652	1.00823	1.02501	1.08806	0.994714	1.0009	0.986788	1.0144	1.01837	1.02173	1.00692	1.00351
262	chr1	164775078	165315421	1.0003	1.03842	1.02388	1.0027	1.01319	1.02737	1.00652	1.0539	0.92895	1.05475	1.04739	1.00672	1.21823	1.00511	1.04687	1.03241	1.00965	0.919523	0.99372	1.02327	1.02624	0.983931	1.014	1.00471	1.02624	1.00783	1.03221	1.02194	0.984029	0.989258	1.01603	1.0028	0.986393	0.985408	0.982652	1.00823	1.02501	1.08806	0.994714	1.0009	0.986788	1.0144	1.01837	1.02173	1.00692	1.00351
263	chr1	165315422	165875418	1.0003	1.03842	1.02388	1.0027	1.01319	1.02737	1.00652	1.0539	0.92895	1.05475	1.04739	1.00672	1.21823	1.00511	1.04687	1.03241	1.00965	0.919523	0.99372	1.02327	1.02624	0.983931	1.014	1.00471	1.02624	1.00783	1.03221	1.02194	0.984029	0.989258	1.01603	1.0028	0.986393	0.985408	0.982652	1.00823	1.02501	1.08806	0.994714	1.0009	0.986788	1.0144	1.01837	1.02173	1.00692	1.00351
264	chr1	165875419	166483608	1.0003	1.03842	1.02388	1.0027	1.01319	1.02737	1.00652	1.0539	0.92895	1.05475	1.04739	1.00672	1.21823	1.00511	1.04687	1.03241	1.00965	0.919523	0.99372	1.02327	1.02624	0.983931	1.014	1.00471	1.02624	1.00783	1.03221	1.02194	0.984029	0.989258	1.01603	1.0028	0.986393	0.985408	0.982652	1.00823	1.02501	1.08806	0.994714	1.0009	0.986788	1.0144	1.01837	1.02173	1.00692	1.00351
265	chr1	166483609	167078826	1.0003	1.03842	1.02388	1.0027	1.01319	1.02737	1.00652	1.0539	0.92895	1.05475	1.04739	1.00672	1.21823	1.00511	1.04687	1.03241	1.00965	0.919523	0.99372	1.02327	1.02624	0.983931	1.014	1.00471	1.02624	1.00783	1.03221	1.02194	0.984029	0.989258	1.01603	1.0028	0.986393	0.985408	0.982652	1.00823	1.02501	1.08806	0.994714	1.0009	0.986788	1.0144	1.01837	1.02173	1.00692	1.00351
266	chr1	167078827	167647336	1.0003	0.576892	1.02388	1.0027	1.01319	1.02737	1.00652	1.0539	0.92895	1.05475	1.04739	1.00672	1.21823	1.00511	1.04687	1.03241	1.00965	0.919523	0.99372	1.02327	1.02624	0.983931	1.014	1.00471	1.02624	1.00783	1.03221	1.02194	0.984029	0.989258	1.01603	1.0028	0.986393	0.985408	0.982652	1.00823	1.02501	1.08806	0.994714	1.0009	0.986788	1.0144	1.01837	1.02173	1.00692	1.00351
267	chr1	167647337	168224832	1.0003	0.576892	1.02388	1.0027	1.01319	1.02737	1.00652	1.0539	0.92895	1.05475	1.04739	1.00672	1.21823	1.00511	1.04687	1.03241	1.00965	0.919523	0.99372	1.02327	1.02624	0.983931	1.014	1.00471	1.02624	1.00783	1.03221	1.02194	0.984029	0.989258	1.01603	1.0028	0.986393	0.985408	0.982652	1.00823	1.02501	1.08806	0.994714	1.0009	0.986788	1.0144	1.01837	1.02173	1.00692	1.00351
268	chr1	168224833	168776108	1.0003	0.576892	1.02388	1.0027	1.01319	1.02737	1.00652	1.0539	0.92895	1.05475	1.04739	1.00672	1.21823	1.00511	1.04687	1.03241	1.00965	0.919523	0.99372	1.02327	1.02624	0.983931	1.014	1.00471	1.02624	1.00783	1.03221	1.02194	0.984029	0.989258	1.01603	1.0028	0.986393	0.985408	0.982652	1.00823	1.02501	1.08806	0.994714	1.0009	0.986788	1.0144	1.01837	1.02173	1.00692	1.00351
269	chr1	168776109	169361735	1.0003	0.576892	1.02388	1.0027	1.01319	1.02737	1.00652	1.0539	0.92895	1.05475	1.04739	1.00672	1.21823	1.00511	1.04687	1.03241	1.00965	0.919523	0.99372	1.02327	1.02624	0.983931	1.014	1.00471	1.02624	1.00783	1.03221	1.02194	0.984029	0.989258	1.01603	1.0028	0.986393	0.985408	0.982652	1.00823	1.02501	1.08806	0.994714	1.0009	0.986788	1.0144	1.01837	1.02173	1.00692	1.00351
270	chr1	169361736	169953516	1.0003	0.576892	1.02388	1.0027	1.01319	1.02737	1.00652	1.0539	0.92895	1.05475	1.04739	1.00672	1.21823	1.00511	1.04687	1.03241	1.00965	0.919523	0.99372	1.02327	1.02624	0.983931	1.014	1.00471	1.02624	1.00783	1.03221	1.02194	0.984029	0.989258	1.01603	1.0028	0.986393	0.985408	0.982652	1.00823	1.02501	1.08806	0.994714	1.0009	0.986788	1.0144	1.01837	1.02173	1.00692	1.00351
271	chr1	169953517	170550450	1.0003	0.576892	1.02388	1.0027	1.01319	1.02737	1.00652	1.0539	0.92895	1.05475	1.04739	1.00672	1.21823	1.00511	1.04687	1.03241	1.00965	0.919523	0.99372	1.02327	1.02624	0.983931	1.014	1.00471	1.02624	1.00783	1.03221	1.02194	0.984029	0.989258	1.01603	1.0028	0.986393	0.985408	0.982652	1.00823	1.02501	1.08806	0.994714	1.0009	0.986788	1.0144	1.01837	1.02173	1.00692	1.00351
272	chr1	170550451	171130283	1.0003	0.576892	1.02388	1.0027	1.01319	1.02737	1.00652	1.0539	0.92895	1.05475	1.04739	1.00672	1.21823	1.00511	1.04687	1.03241	1.00965	0.919523	0.99372	1.02327	1.02624	0.983931	1.014	1.00471	1.02624	1.00783	1.03221	1.02194	0.984029	0.989258	1.01603	1.0028	0.986393	0.985408	0.982652	1.00823	1.02501	1.08806	0.994714	1.0009	0.986788	1.0144	1.01837	1.02173	1.00692	1.00351
273	chr1	171130284	171709197	1.0003	0.576892	1.02388	1.0027	1.01319	1.02737	1.00652	1.0539	0.92895	1.05475	1.04739	1.00672	1.21823	1.00511	1.04687	1.03241	1.00965	0.919523	0.99372	1.02327	1.02624	0.983931	1.014	1.00471	1.02624	1.00783	1.03221	1.02194	0.984029	0.989258	1.01603	1.0028	0.986393	0.985408	0.982652	1.00823	1.02501	1.08806	0.994714	1.0009	0.986788	1.0144	1.01837	1.02173	1.00692	1.00351
274	chr1	171709198	172294041	1.0003	0.576892	1.02388	1.0027	1.01319	1.02737	1.00652	1.0539	0.92895	1.05475	1.04739	1.00672	1.21823	1.00511	1.04687	1.03241	1.00965	0.919523	0.99372	1.02327	1.02624	0.983931	1.014	1.00471	1.02624	1.00783	1.03221	1.02194	0.984029	0.989258	1.01603	1.0028	0.986393	0.985408	0.982652	1.00823	1.02501	1.08806	0.994714	1.0009	0.986788	1.0144	1.01837	1.02173	1.00692	1.00351
275	chr1	172294042	172861202	1.0003	0.576892	1.02388	1.0027	1.01319	1.02737	1.00652	1.0539	0.92895	1.05475	1.04739	1.00672	1.21823	1.00511	1.04687	1.03241	1.00965	0.919523	0.99372	1.02327	1.02624	0.983931	1.014	1.00471	1.02624	1.00783	1.03221	1.02194	0.984029	0.989258	1.01603	1.0028	0.986393	0.985408	0.982652	1.00823	1.02501	1.08806	0.994714	1.0009	0.986788	1.0144	1.01837	1.02173	1.00692	1.00351
276	chr1	172861203	173429987	1.0003	0.576892	1.02388	1.0027	1.01319	1.02737	1.00652	1.0539	0.92895	1.05475	1.04739	1.00672	1.21823	1.00511	1.04687	1.03241	1.00965	0.919523	0.99372	1.02327	1.02624	0.983931	1.014	1.00471	1.02624	1.00783	1.03221	1.02194	0.984029	0.989258	1.01603	1.0028	0.986393	0.985408	0.982652	1.00823	1.02501	1.08806	0.994714	1.0009	0.986788	1.0144	1.01837	1.02173	1.00692	1.00351
277	chr1	173429988	174048820	1.0003	0.576892	1.02388	1.0027	1.01319	1.02737	1.00652	1.0539	0.92895	1.05475	1.04739	1.00672	0.969379	1.00511	1.04687	1.03241	1.00965	0.919523	0.99372	1.02327	1.02624	0.983931	1.014	1.00471	1.02624	1.00783	1.03221	1.02194	0.984029	0.989258	1.01603	1.0028	0.986393	0.985408	0.982652	1.00823	1.02501	1.08806	0.994714	1.0009	0.986788	1.0144	1.01837	1.02173	1.00692	1.00351
278	chr1	174048821	174718058	1.0003	0.576892	1.02388	1.0027	1.01319	1.02737	1.00652	1.0539	0.92895	1.05475	1.04739	1.00672	0.969379	1.00511	1.04687	1.03241	1.00965	0.919523	0.99372	1.02327	1.02624	0.983931	1.014	1.00471	1.02624	1.00783	1.03221	1.02194	0.984029	0.989258	1.01603	1.0028	0.986393	0.985408	0.982652	1.00823	1.02501	1.08806	0.994714	1.0009	0.986788	1.0144	1.01837	1.02173	1.00692	1.00351
279	chr1	174718059	175291788	1.0003	0.576892	1.02388	1.0027	1.01319	1.02737	1.00652	1.0539	0.92895	1.05475	1.04739	1.00672	0.969379	1.00511	1.04687	1.03241	1.00965	0.919523	0.99372	1.02327	1.02624	0.983931	1.014	1.00471	1.02624	1.00783	1.03221	1.02194	0.984029	0.989258	1.01603	1.0028	0.986393	0.985408	0.982652	1.00823	1.02501	1.08806	0.994714	1.0009	0.986788	1.0144	1.01837	1.02173	1.00692	1.00351
280	chr1	175291789	175811133	1.0003	0.576892	1.02388	1.0027	1.01319	1.02737	1.00652	1.0539	0.92895	1.05475	1.04739	1.00672	0.969379	1.00511	1.04687	1.03241	1.00965	0.919523	0.99372	1.02327	1.02624	0.983931	1.014	1.00471	1.02624	1.00783	1.03221	1.02194	0.984029	0.989258	1.01603	1.0028	0.986393	0.985408	0.982652	1.00823	1.02501	1.08806	0.994714	1.0009	0.986788	1.0144	1.01837	1.02173	1.00692	1.00351
281	chr1	175811134	176430506	1.0003	0.576892	1.02388	1.0027	1.01319	1.02737	1.00652	1.0539	0.92895	1.05475	1.04739	1.00672	0.969379	1.00511	1.04687	1.03241	1.00965	0.919523	0.99372	1.02327	1.02624	0.983931	1.014	1.00471	1.02624	1.00783	1.03221	1.02194	0.984029	0.989258	1.01603	1.0028	0.986393	0.985408	0.982652	1.00823	1.02501	1.08806	0.994714	1.0009	0.986788	1.0144	1.01837	1.02173	1.00692	1.00351
282	chr1	176430507	176987176	1.0003	0.576892	1.02388	1.0027	1.01319	1.02737	0.628449	1.0539	0.92895	1.05475	1.04739	1.00672	0.969379	1.00511	1.04687	1.03241	1.00965	0.919523	0.99372	1.02327	1.02624	0.983931	1.014	1.00471	1.02624	1.00783	1.03221	1.02194	0.984029	0.989258	1.01603	1.0028	0.986393	0.985408	0.982652	1.00823	1.02501	1.08806	0.994714	1.0009	0.986788	1.0144	1.01837	1.02173	1.00692	1.00351
283	chr1	176987177	177519882	1.0003	0.576892	1.02388	1.0027	1.01319	1.02737	0.628449	1.0539	0.92895	1.05475	1.04739	1.00672	0.969379	1.00511	1.04687	1.03241	1.00965	0.919523	0.99372	1.02327	1.02624	0.983931	1.014	1.00471	1.02624	1.00783	1.03221	1.02194	0.984029	0.989258	1.01603	1.0028	0.986393	0.985408	0.982652	1.00823	1.02501	1.08806	0.994714	1.0009	0.986788	1.0144	1.01837	1.02173	1.00692	1.00351
284	chr1	177519883	178071529	1.0003	0.576892	1.02388	1.0027	1.01319	1.02737	0.628449	1.0539	0.92895	1.05475	1.04739	1.00672	0.969379	1.00511	1.04687	1.03241	1.00965	0.919523	0.99372	1.02327	1.02624	0.983931	1.014	1.00471	1.02624	1.00783	1.03221	1.02194	0.984029	0.989258	1.01603	1.0028	0.986393	0.985408	0.982652	1.00823	1.02501	1.08806	0.994714	1.0009	0.986788	1.0144	1.01837	1.02173	1.00692	1.00351
285	chr1	178071530	178617151	1.0003	0.576892	1.02388	1.0027	1.01319	1.02737	0.628449	1.0539	0.92895	1.05475	1.04739	1.00672	0.969379	1.00511	1.04687	1.03241	1.00965	0.919523	0.99372	1.02327	1.02624	0.983931	1.014	1.00471	1.02624	1.00783	1.03221	1.02194	0.984029	0.989258	1.01603	1.0028	0.986393	0.985408	0.982652	1.00823	1.02501	1.08806	0.994714	1.0009	0.986788	1.0144	1.01837	1.02173	1.00692	1.00351
286	chr1	178617152	179183920	1.0003	0.576892	1.02388	1.0027	1.01319	1.02737	0.628449	1.0539	0.92895	1.05475	1.04739	1.00672	0.969379	1.00511	1.04687	1.03241	1.00965	0.919523	0.99372	1.02327	1.02624	0.983931	1.014	1.00471	1.02624	1.00783	1.03221	1.02194	0.984029	0.989258	1.01603	1.0028	0.986393	0.985408	0.982652	1.00823	1.02501	1.08806	0.994714	1.0009	0.986788	1.0144	1.01837	1.02173	1.00692	1.00351
287	chr1	179183921	179801512	1.0003	0.982554	1.02388	1.0027	1.01319	1.02737	0.628449	1.0539	0.92895	1.05475	1.04739	1.00672	0.969379	1.00511	1.04687	1.03241	1.00965	0.919523	0.99372	1.02327	1.02624	0.983931	1.014	1.00471	1.02624	1.00783	1.03221	1.02194	0.984029	0.989258	1.01603	1.0028	0.986393	0.985408	0.982652	1.00823	1.02501	1.08806	0.994714	1.0009	0.986788	1.0144	1.01837	1.02173	1.00692	1.00351
288	chr1	179801513	180363739	1.0003	0.982554	1.02388	1.0027	1.01319	1.02737	0.995112	1.0539	0.92895	1.05475	1.04739	1.00672	0.969379	1.00511	1.04687	1.03241	1.00965	0.919523	0.99372	1.02327	1.02624	0.983931	1.014	1.00471	1.02624	1.00783	1.03221	1.02194	0.984029	0.989258	1.01603	1.0028	0.986393	0.985408	0.982652	1.00823	1.02501	1.08806	0.994714	1.0009	0.986788	1.0144	1.01837	1.02173	1.00692	1.00351
289	chr1	180363740	180944217	1.0003	0.982554	1.02388	1.0027	1.01319	1.02737	0.995112	1.0539	0.92895	1.05475	1.04739	1.00672	0.969379	1.00511	1.04687	1.03241	1.00965	0.919523	0.99372	1.02327	1.02624	0.983931	1.014	1.00471	1.02624	1.00783	1.03221	1.02194	0.984029	0.989258	1.01603	1.0028	0.986393	0.985408	0.982652	1.00823	1.02501	1.08806	0.994714	1.0009	0.986788	1.0144	1.01837	1.02173	1.00692	1.00351
290	chr1	180944218	181474886	1.0003	0.982554	1.02388	1.0027	1.01319	1.02737	0.995112	1.0539	0.92895	1.05475	1.04739	1.00672	0.969379	1.00511	1.04687	1.03241	1.00965	0.919523	0.99372	1.02327	1.02624	0.983931	1.014	1.00471	1.02624	1.00783	1.03221	1.02194	0.984029	0.989258	1.01603	1.0028	0.986393	0.985408	0.982652	1.00823	1.02501	1.08806	0.994714	1.0009	0.986788	1.0144	1.01837	1.02173	1.00692	1.00351
291	chr1	181474887	182029950	1.0003	0.982554	1.02388	1.0027	1.01319	1.02737	0.995112	1.0539	0.92895	1.05475	1.04739	1.00672	0.969379	1.00511	1.04687	1.03241	1.00965	0.919523	0.99372	1.02327	1.02624	0.983931	1.014	1.00471	1.02624	1.00783	1.03221	1.02194	0.984029	0.989258	1.01603	1.0028	0.986393	0.985408	0.982652	1.00823	1.02501	1.08806	0.994714	1.0009	0.986788	1.0144	1.01837	1.02173	1.00692	1.00351
292	chr1	182029951	182594508	1.0003	0.982554	1.02388	1.0027	1.01319	1.02737	0.995112	1.0539	0.92895	1.05475	1.04739	1.00672	0.969379	1.00511	1.04687	1.03241	1.00965	0.919523	0.99372	1.02327	1.02624	0.983931	1.014	1.00471	1.02624	1.00783	1.03221	1.02194	0.984029	0.989258	1.01603	1.0028	0.986393	0.985408	0.982652	1.00823	1.02501	1.08806	0.994714	1.0009	0.986788	1.0144	1.01837	1.02173	1.00692	1.00351
293	chr1	182594509	183145444	1.0003	0.982554	1.02388	1.0027	1.01319	1.02737	0.995112	1.0539	0.92895	1.05475	1.04739	1.00672	0.969379	1.00511	1.04687	1.03241	1.00965	0.919523	0.99372	1.02327	1.02624	0.983931	1.014	1.00471	1.02624	1.00783	1.03221	1.02194	0.984029	0.989258	1.01603	1.0028	0.986393	0.985408	0.982652	1.00823	1.02501	1.08806	0.994714	1.0009	0.986788	1.0144	1.01837	1.02173	1.00692	1.00351
294	chr1	183145445	183703833	1.0003	0.982554	1.02388	1.0027	1.01319	1.02737	0.995112	1.0539	0.92895	1.05475	1.04739	1.00672	0.969379	1.00511	1.04687	1.03241	1.00965	0.919523	0.99372	1.02327	1.02624	0.983931	1.014	1.00471	1.02624	1.00783	1.03221	1.02194	0.984029	0.989258	1.01603	1.0028	0.986393	0.985408	0.982652	1.00823	1.02501	1.08806	0.994714	1.0009	0.986788	1.0144	1.01837	1.02173	1.00692	1.00351
295	chr1	183703834	184230504	1.0003	0.982554	1.02388	1.0027	1.01319	1.02737	0.995112	1.0539	0.92895	1.05475	1.04739	1.00672	0.969379	1.00511	1.04687	1.03241	1.00965	0.919523	0.99372	1.02327	1.02624	0.983931	1.014	1.00471	1.02624	1.00783	1.03221	1.02194	0.984029	0.989258	1.01603	1.0028	0.986393	0.985408	0.982652	1.00823	1.02501	1.08806	0.994714	1.0009	0.986788	1.0144	1.01837	1.02173	1.00692	1.00351
296	chr1	184230505	184775642	1.0003	0.982554	1.02388	1.0027	1.01319	1.02737	0.995112	1.0539	0.92895	1.05475	1.04739	1.00672	0.969379	1.00511	1.04687	1.03241	1.00965	0.919523	0.99372	1.02327	1.02624	0.983931	1.014	1.00471	1.02624	1.00783	1.03221	1.02194	0.984029	0.989258	1.01603	1.0028	0.986393	0.985408	0.982652	1.00823	1.02501	1.08806	0.994714	1.0009	0.986788	1.0144	1.01837	1.02173	1.00692	1.00351
297	chr1	184775643	185364729	1.0003	0.982554	1.02388	1.0027	1.01319	1.02737	0.995112	1.0539	0.92895	1.05475	1.04739	1.00672	0.969379	1.00511	1.04687	1.03241	1.00965	0.919523	0.99372	1.02327	1.02624	0.983931	1.014	1.00471	1.02624	1.00783	1.03221	1.02194	0.984029	0.989258	1.01603	1.0028	0.986393	0.985408	0.982652	1.00823	1.02501	1.08806	0.994714	1.0009	0.986788	1.0144	1.01837	1.02173	1.00692	1.00351
298	chr1	185364730	185958867	1.0003	0.982554	1.02388	1.0027	1.01319	1.02737	0.995112	1.0539	0.92895	1.05475	1.04739	1.00672	0.969379	1.00511	1.04687	1.03241	1.00965	0.919523	0.99372	1.02327	1.02624	0.983931	1.014	1.00471	1.02624	1.00783	1.03221	1.02194	0.984029	0.989258	1.01603	1.0028	0.986393	0.985408	0.982652	1.00823	1.02501	1.08806	0.994714	1.0009	0.986788	1.0144	1.01837	1.02173	1.00692	1.00351
299	chr1	185958868	186547492	1.0003	0.982554	1.02388	1.0027	1.01319	1.02737	0.995112	1.0539	0.92895	1.05475	1.04739	1.00672	0.969379	1.00511	1.04687	1.03241	1.00965	0.919523	0.99372	1.02327	1.02624	0.983931	1.014	1.00471	1.02624	1.00783	1.03221	1.02194	0.984029	0.989258	1.01603	1.0028	0.986393	0.985408	0.982652	1.00823	1.02501	1.08806	0.994714	1.0009	0.986788	1.0144	1.01837	1.02173	1.00692	1.00351
300	chr1	186547493	187181921	1.0003	0.982554	1.02388	1.0027	1.01319	1.02737	0.995112	1.0539	0.92895	1.05475	1.04739	1.00672	0.969379	1.00511	1.04687	1.03241	1.00965	0.919523	0.99372	1.02327	1.02624	0.983931	1.014	1.00471	1.02624	1.00783	1.03221	1.02194	0.984029	0.989258	1.01603	1.0028	0.986393	0.985408	0.982652	1.00823	1.02501	1.08806	0.994714	1.0009	0.986788	1.0144	1.01837	1.02173	1.00692	1.00351
301	chr1	187181922	187838777	1.0003	0.982554	1.02388	1.0027	1.01319	1.02737	0.995112	1.0539	0.92895	1.05475	1.04739	1.00672	0.969379	1.00511	1.04687	1.03241	1.00965	0.919523	0.99372	1.02327	1.02624	0.983931	1.014	1.00471	1.02624	1.00783	1.03221	1.02194	0.984029	0.989258	1.01603	1.0028	0.986393	0.985408	0.982652	1.00823	1.02501	1.08806	0.994714	1.0009	0.986788	1.0144	1.01837	1.02173	1.00692	1.00351
302	chr1	187838778	188522302	1.0003	0.982554	1.02388	1.0027	1.01319	1.02737	0.995112	1.0539	0.92895	1.05475	1.04739	1.00672	0.969379	1.00511	1.04687	1.03241	1.00965	0.919523	0.99372	1.02327	1.02624	0.983931	1.014	1.00471	1.02624	1.00783	1.03221	1.02194	0.984029	0.989258	1.01603	1.0028	0.986393	0.985408	0.982652	1.00823	1.02501	1.08806	0.994714	1.0009	0.986788	1.0144	1.01837	1.02173	1.00692	1.00351
303	chr1	188522303	189249333	1.0003	0.982554	1.02388	1.0027	1.01319	1.02737	0.995112	1.0539	0.92895	1.05475	1.04739	1.00672	0.969379	1.00511	1.04687	1.03241	1.00965	0.919523	0.99372	1.02327	1.02624	0.983931	1.014	1.00471	1.02624	1.00783	1.03221	1.02194	0.984029	0.989258	1.01603	1.0028	0.986393	0.985408	0.982652	1.00823	1.02501	1.08806	0.994714	1.0009	0.986788	1.0144	1.01837	1.02173	1.00692	1.00351
304	chr1	189249334	190011952	1.0003	0.982554	1.02388	1.0027	1.01319	1.02737	0.995112	1.0539	0.92895	1.05475	1.04739	1.00672	0.969379	1.00511	1.04687	1.03241	1.00965	0.919523	0.99372	1.02327	1.02624	0.983931	1.014	1.00471	1.02624	1.00783	1.03221	1.02194	0.984029	0.989258	1.01603	1.0028	0.986393	0.985408	0.982652	1.00823	1.02501	1.08806	0.994714	1.0009	0.986788	1.0144	1.01837	1.02173	1.00692	1.00351
305	chr1	190011953	190714328	1.0003	0.982554	1.02388	1.0027	1.01319	1.02737	0.995112	1.0539	0.92895	1.05475	1.04739	1.00672	0.969379	1.00511	1.04687	1.03241	1.00965	0.919523	0.99372	1.02327	1.02624	0.983931	1.014	1.00471	1.02624	1.00783	1.03221	1.02194	0.984029	0.989258	1.01603	1.0028	0.986393	0.985408	0.982652	1.00823	1.02501	1.08806	0.994714	1.0009	0.986788	1.0144	1.01837	1.02173	1.00692	1.00351
306	chr1	190714329	191409719	1.0003	0.982554	1.02388	1.0027	1.01319	1.02737	0.995112	1.0539	0.92895	1.05475	1.04739	1.00672	0.969379	1.00511	1.04687	1.03241	1.00965	0.919523	0.99372	1.02327	1.02624	0.983931	1.014	1.00471	1.02624	1.00783	1.03221	1.02194	0.984029	0.989258	1.01603	1.0028	0.986393	0.985408	0.982652	1.00823	1.02501	1.08806	0.994714	1.0009	0.986788	1.0144	1.01837	1.02173	1.00692	1.00351
307	chr1	191409720	192076189	1.0003	0.982554	1.02388	1.0027	1.01319	1.02737	0.995112	1.0539	0.92895	1.05475	1.04739	1.00672	0.969379	1.00511	1.04687	1.03241	1.00965	0.919523	0.99372	1.02327	1.02624	0.983931	1.014	1.00471	1.02624	1.00783	1.03221	1.02194	0.984029	0.989258	1.01603	1.0028	0.986393	0.985408	0.982652	1.00823	1.02501	1.08806	0.994714	1.0009	0.986788	1.0144	1.01837	1.02173	1.00692	1.00351
308	chr1	192076190	192699909	1.0003	0.982554	1.02388	1.0027	1.01319	1.02737	0.995112	1.0539	0.92895	1.05475	1.04739	1.00672	0.969379	1.00511	1.04687	1.03241	1.00965	0.919523	0.99372	1.02327	1.02624	0.983931	1.014	1.00471	1.02624	1.00783	1.03221	1.02194	0.984029	0.989258	1.01603	1.0028	0.986393	0.985408	0.982652	1.00823	1.02501	1.08806	0.994714	1.0009	0.986788	1.0144	1.01837	1.02173	1.00692	1.00351
309	chr1	192699910	193302245	1.0003	0.982554	1.02388	1.0027	1.01319	1.02737	0.995112	1.0539	0.92895	1.05475	1.04739	1.00672	0.969379	1.00511	1.04687	1.03241	1.00965	0.919523	0.99372	1.02327	1.02624	0.983931	1.014	1.00471	1.02624	1.00783	1.03221	1.02194	0.984029	0.989258	1.01603	1.0028	0.986393	0.985408	0.982652	1.00823	1.02501	1.08806	0.994714	1.0009	0.986788	1.0144	1.01837	1.02173	1.00692	1.00351
310	chr1	193302246	193902297	1.0003	0.982554	1.02388	1.0027	1.01319	1.02737	0.995112	1.0539	0.92895	1.05475	1.04739	1.00672	0.969379	1.00511	1.04687	1.03241	1.00965	0.919523	0.99372	1.02327	1.02624	0.983931	1.014	1.00471	1.02624	1.00783	1.03221	1.02194	0.984029	0.989258	1.01603	1.0028	0.986393	0.985408	0.982652	1.00823	1.02501	1.08806	0.994714	1.0009	0.986788	1.0144	1.01837	1.02173	1.00692	1.00351
311	chr1	193902298	194588139	1.0003	0.982554	1.02388	1.0027	1.01319	1.02737	0.995112	1.0539	0.92895	1.05475	1.04739	1.00672	0.969379	1.00511	1.04687	1.03241	1.00965	0.919523	0.99372	1.02327	1.02624	0.983931	1.014	1.00471	1.02624	1.00783	1.03221	1.02194	0.984029	0.989258	1.01603	1.0028	0.986393	0.985408	0.982652	1.00823	1.02501	1.08806	0.994714	1.0009	0.986788	1.0144	1.01837	1.02173	1.00692	1.00351
312	chr1	194588140	195294570	1.0003	0.982554	1.02388	1.0027	1.01319	1.02737	0.995112	1.0539	0.92895	1.05475	1.04739	1.00672	0.969379	1.00511	1.04687	1.03241	1.00965	0.919523	0.99372	1.02327	1.02624	0.983931	1.014	1.00471	1.02624	1.00783	1.03221	1.02194	0.984029	0.989258	1.01603	1.0028	0.986393	0.985408	0.982652	1.00823	1.02501	1.08806	0.994714	1.0009	0.986788	1.0144	1.01837	1.02173	1.00692	1.00351
313	chr1	195294571	195971410	1.0003	0.982554	1.02388	1.0027	1.01319	1.02737	0.995112	1.0539	0.92895	1.05475	1.04739	1.00672	0.969379	1.00511	1.04687	1.03241	1.00965	0.919523	0.99372	1.02327	1.02624	0.983931	1.014	1.00471	1.02624	1.00783	1.03221	1.02194	0.984029	0.989258	1.01603	1.0028	0.986393	0.985408	0.982652	1.00823	1.02501	1.08806	0.994714	1.0009	0.986788	1.0144	1.01837	1.02173	1.00692	1.00351
314	chr1	195971411	196608520	1.0003	0.982554	1.02388	1.0027	1.01319	1.02737	0.995112	1.0539	0.92895	1.05475	1.04739	1.00672	0.969379	1.00511	1.04687	1.03241	1.00965	0.919523	0.99372	1.02327	1.02624	0.983931	1.014	1.00471	1.02624	1.00783	1.03221	1.02194	0.984029	0.989258	1.01603	1.0028	0.986393	0.985408	0.982652	1.00823	1.02501	1.08806	0.994714	1.0009	0.986788	1.0144	1.01837	1.02173	1.00692	1.00351
315	chr1	196608521	197238353	1.0003	0.982554	1.02388	1.0027	1.01319	1.02737	0.995112	1.0539	0.92895	1.05475	1.04739	1.00672	0.969379	1.00511	1.04687	1.03241	1.00965	0.919523	0.99372	1.02327	1.02624	0.983931	1.014	1.00471	1.02624	1.00783	1.03221	1.02194	0.984029	0.989258	1.01603	1.0028	0.986393	0.985408	0.982652	1.00823	1.02501	1.08806	0.994714	1.0009	0.986788	1.0144	1.01837	1.02173	1.00692	1.00351
316	chr1	197238354	197896658	1.0003	0.982554	1.02388	1.0027	1.01319	1.02737	0.995112	1.0539	0.92895	1.05475	1.04739	1.00672	0.969379	1.00511	1.04687	1.03241	1.00965	0.919523	0.99372	1.02327	1.02624	0.983931	1.014	1.00471	1.02624	1.00783	1.03221	1.02194	0.984029	0.989258	1.01603	1.0028	0.986393	0.985408	0.982652	1.00823	1.02501	1.08806	0.994714	1.0009	0.986788	1.0144	1.01837	1.02173	1.00692	1.00351
317	chr1	197896659	198484139	1.0003	0.982554	1.02388	1.0027	1.01319	1.02737	0.995112	1.0539	0.92895	1.05475	1.04739	1.00672	0.969379	1.00511	1.04687	1.03241	1.00965	0.919523	0.99372	1.02327	1.02624	0.983931	1.014	1.00471	1.02624	1.00783	1.03221	1.02194	0.984029	0.989258	1.01603	1.0028	0.986393	0.985408	0.982652	1.00823	1.02501	1.08806	0.994714	1.0009	0.986788	1.0144	1.01837	1.02173	1.00692	1.00351
318	chr1	198484140	199063095	1.0003	0.982554	1.02388	1.0027	1.01319	1.02737	0.995112	1.0539	0.92895	1.05475	1.04739	1.00672	0.969379	1.00511	1.04687	1.03241	1.00965	0.919523	0.99372	1.02327	1.02624	0.983931	1.014	1.00471	1.02624	1.00783	1.03221	1.02194	0.984029	0.989258	1.01603	1.0028	0.986393	0.985408	0.982652	1.00823	1.02501	1.08806	0.994714	1.0009	0.986788	1.0144	1.01837	1.02173	1.00692	1.00351
319	chr1	199063096	199678538	1.0003	0.982554	1.02388	1.0027	1.01319	1.02737	0.995112	1.0539	0.92895	1.05475	1.04739	1.00672	0.969379	1.00511	1.04687	1.03241	1.00965	0.919523	0.99372	1.02327	1.02624	0.983931	1.014	1.00471	1.02624	1.00783	1.03221	1.02194	0.984029	0.989258	1.01603	1.0028	0.986393	0.985408	0.982652	1.00823	1.02501	1.08806	0.994714	1.0009	0.986788	1.0144	1.01837	1.02173	1.00692	1.00351
320	chr1	199678539	200252753	1.0003	0.982554	1.02388	1.0027	1.01319	1.02737	0.995112	1.0539	0.92895	1.05475	1.04739	1.00672	0.969379	1.00511	1.04687	1.03241	1.00965	0.919523	0.99372	1.02327	1.02624	0.983931	1.014	1.00471	1.02624	1.00783	1.03221	1.02194	0.984029	0.989258	1.01603	1.0028	0.986393	0.985408	0.982652	1.00823	1.02501	1.08806	0.994714	1.0009	0.986788	1.0144	1.01837	1.02173	1.00692	1.00351
321	chr1	200252754	200829650	1.0003	0.982554	1.02388	1.0027	1.01319	1.02737	0.995112	1.0539	0.92895	1.05475	1.04739	1.00672	0.969379	1.00511	1.04687	1.03241	1.00965	0.919523	0.99372	1.02327	1.02624	0.983931	1.014	1.00471	1.02624	1.00783	1.03221	1.02194	0.984029	0.989258	1.01603	1.0028	0.986393	0.985408	0.982652	1.00823	1.02501	1.08806	0.994714	1.0009	0.986788	1.0144	1.01837	1.02173	1.00692	1.00351
322	chr1	200829651	201330821	1.0003	0.982554	1.02388	1.0027	1.01319	1.02737	0.995112	1.0539	0.92895	1.05475	1.04739	1.00672	0.969379	1.00511	1.04687	1.03241	1.00965	0.919523	0.99372	1.02327	1.02624	0.983931	1.014	1.00471	1.02624	1.00783	1.03221	1.02194	0.984029	0.989258	1.01603	1.0028	0.986393	0.985408	0.982652	1.00823	1.02501	1.08806	0.994714	1.0009	0.986788	1.0144	1.01837	1.02173	1.00692	1.00351
323	chr1	201330822	201843451	1.0003	0.982554	1.02388	1.0027	1.01319	1.02737	0.995112	1.0539	0.92895	1.05475	1.04739	1.00672	0.969379	1.00511	1.04687	1.03241	1.00965	0.919523	0.99372	1.02327	1.02624	0.983931	1.014	1.00471	1.02624	1.00783	1.03221	1.02194	0.984029	0.989258	1.01603	1.0028	0.986393	0.985408	0.982652	1.00823	1.02501	1.08806	0.994714	1.0009	0.986788	1.0144	1.01837	1.02173	1.00692	1.00351
324	chr1	201843452	202398637	1.0003	0.982554	1.02388	1.0027	1.01319	1.02737	0.995112	1.0539	0.92895	1.05475	1.04739	1.00672	0.969379	1.00511	1.04687	1.03241	1.00965	0.919523	0.99372	1.02327	1.02624	0.983931	1.014	1.00471	1.02624	1.00783	1.03221	1.02194	0.984029	0.989258	1.01603	1.0028	0.986393	0.985408	0.982652	1.00823	1.02501	1.08806	0.994714	1.0009	0.986788	1.0144	1.01837	1.02173	1.00692	1.00351
325	chr1	202398638	202930496	1.0003	0.982554	1.02388	1.0027	1.01319	1.02737	0.995112	1.0539	0.92895	1.05475	1.04739	1.00672	0.969379	1.00511	1.04687	1.03241	1.00965	0.919523	0.99372	1.02327	1.02624	0.983931	1.014	1.00471	1.02624	1.00783	1.03221	1.02194	0.984029	0.989258	1.01603	1.0028	0.986393	0.985408	0.982652	1.00823	1.02501	1.08806	0.994714	1.0009	0.986788	1.0144	1.01837	1.02173	1.00692	1.00351
326	chr1	202930497	203442514	1.0003	0.982554	1.02388	1.0027	1.01319	1.02737	0.995112	1.0539	0.92895	1.05475	1.04739	1.00672	0.969379	1.00511	1.04687	1.03241	1.00965	0.919523	0.99372	1.02327	1.02624	0.983931	1.014	1.00471	1.02624	1.00783	1.03221	0.366888	0.984029	0.989258	1.01603	1.0028	0.986393	0.985408	0.982652	1.00823	1.02501	1.08806	0.994714	1.0009	0.986788	1.0144	1.01837	1.02173	1.00692	1.00351
327	chr1	203442515	203995279	1.0003	0.982554	1.02388	1.0027	1.01319	1.02737	0.995112	1.0539	0.92895	1.05475	1.04739	1.00672	0.969379	1.00511	1.04687	1.03241	1.00965	0.919523	0.99372	1.02327	1.02624	0.983931	1.014	1.00471	1.02624	1.00783	1.03221	0.366888	0.984029	0.989258	1.01603	1.0028	0.986393	0.985408	0.982652	1.00823	1.02501	1.08806	0.994714	1.0009	0.986788	1.0144	1.01837	1.02173	1.00692	1.00351
328	chr1	203995280	204509755	1.0003	0.982554	1.02388	1.0027	1.01319	1.02737	0.995112	1.0539	0.92895	1.05475	1.04739	1.00672	0.969379	1.00511	1.04687	1.03241	1.00965	0.919523	0.99372	1.02327	1.02624	0.983931	1.014	1.00471	1.02624	1.00783	1.03221	1.00934	0.984029	0.989258	1.01603	1.0028	0.986393	0.985408	0.982652	1.00823	1.02501	1.08806	0.994714	1.0009	0.986788	1.0144	1.01837	1.02173	1.00692	1.00351
329	chr1	204509756	205005865	1.0003	0.982554	1.02388	1.0027	1.01319	1.02737	0.995112	1.0539	0.92895	1.05475	1.04739	1.00672	0.969379	1.00511	1.04687	1.03241	1.00965	0.919523	0.99372	1.02327	1.02624	0.983931	1.014	1.00471	1.02624	1.00783	1.03221	1.00934	0.984029	0.989258	1.01603	1.0028	0.986393	0.985408	0.982652	1.00823	1.02501	1.08806	0.994714	1.0009	0.986788	1.0144	1.01837	1.02173	1.00692	1.00351
330	chr1	205005866	205530310	1.0003	0.982554	1.02388	1.0027	1.01319	1.02737	0.995112	1.0539	0.92895	1.05475	1.04739	1.00672	0.969379	1.00511	1.04687	1.03241	1.00965	0.919523	0.99372	1.02327	1.02624	0.983931	1.014	1.00471	1.02624	1.00783	1.03221	1.00934	0.984029	0.989258	1.01603	1.0028	0.986393	0.985408	0.982652	1.00823	1.02501	1.08806	0.994714	1.0009	0.986788	1.0144	1.01837	1.02173	1.00692	1.00351
331	chr1	205530311	206167745	1.0003	0.982554	1.02388	1.0027	1.01319	1.02737	0.995112	1.0539	0.92895	1.05475	1.04739	1.00672	0.969379	1.00511	1.04687	1.03241	1.00965	0.919523	0.99372	1.02327	1.02624	0.983931	1.014	1.00471	1.02624	1.00783	1.03221	1.00934	0.984029	0.989258	1.01603	1.0028	0.986393	0.985408	0.982652	1.00823	1.02501	1.08806	0.994714	1.0009	0.986788	1.0144	1.01837	1.02173	1.00692	1.00351
332	chr1	206167746	206732803	1.0003	0.982554	1.02388	1.0027	1.01319	1.02737	0.995112	1.0539	0.92895	1.05475	1.04739	1.00672	0.969379	1.00511	1.04687	1.03241	1.00965	0.919523	0.99372	1.02327	1.02624	0.983931	1.014	1.00471	1.02624	1.00783	1.03221	1.00934	0.984029	0.989258	1.01603	1.0028	0.986393	0.985408	0.982652	1.00823	1.02501	1.08806	0.994714	1.0009	0.986788	1.0144	1.01837	1.02173	1.00692	1.00351
333	chr1	206732804	207232712	1.0003	0.982554	1.02388	1.0027	1.01319	1.02737	0.995112	1.0539	0.92895	1.05475	1.04739	1.00672	0.969379	1.00511	1.04687	1.03241	1.00965	0.919523	0.99372	1.02327	1.02624	0.983931	1.014	1.00471	1.02624	1.00783	1.03221	1.00934	0.984029	0.989258	1.01603	1.0028	0.986393	0.985408	0.982652	1.00823	1.02501	1.08806	0.994714	1.0009	0.986788	1.0144	1.01837	1.02173	1.00692	1.00351
334	chr1	207232713	207811117	1.0003	0.982554	1.02388	1.0027	1.01319	1.02737	0.995112	1.0539	0.92895	1.05475	1.04739	1.00672	0.969379	1.00511	1.04687	1.03241	1.00965	0.919523	0.99372	1.02327	1.02624	0.983931	1.014	1.00471	1.02624	1.00783	1.03221	1.00934	0.984029	0.989258	1.01603	1.0028	0.986393	0.985408	0.982652	1.00823	1.02501	1.08806	0.994714	1.0009	0.986788	1.0144	1.01837	1.02173	1.00692	1.00351
335	chr1	207811118	208345901	1.0003	0.982554	1.02388	1.0027	1.01319	1.02737	0.995112	1.0539	0.92895	1.05475	1.04739	1.00672	0.969379	1.00511	1.04687	1.03241	1.00965	0.919523	0.99372	1.02327	1.02624	0.983931	1.014	1.00471	1.02624	1.00783	1.03221	1.00934	0.984029	0.989258	1.01603	1.0028	0.986393	0.985408	0.982652	1.00823	1.02501	1.08806	0.994714	1.0009	0.986788	1.0144	1.01837	1.02173	1.00692	1.00351
336	chr1	208345902	208887442	1.0003	0.982554	1.02388	1.0027	1.01319	1.02737	0.995112	1.0539	0.92895	1.05475	1.04739	1.00672	0.969379	1.00511	1.04687	1.03241	1.00965	0.919523	0.99372	1.02327	1.02624	0.983931	1.014	1.00471	1.02624	1.00783	1.03221	1.00934	0.984029	0.989258	1.01603	1.0028	0.986393	0.985408	0.982652	1.00823	1.02501	1.08806	0.994714	1.0009	0.986788	1.0144	1.01837	1.02173	1.00692	1.00351
337	chr1	208887443	209469269	1.0003	0.982554	1.02388	1.0027	1.01319	1.02737	0.995112	1.0539	0.92895	1.05475	1.04739	1.00672	0.969379	1.00511	1.04687	1.03241	1.00965	0.919523	0.99372	1.02327	1.02624	0.983931	1.014	1.00471	1.02624	1.00783	1.03221	1.00934	0.984029	0.989258	1.01603	1.0028	0.986393	0.985408	0.982652	1.00823	1.02501	1.08806	0.994714	1.0009	0.986788	1.0144	1.01837	1.02173	1.00692	1.00351
338	chr1	209469270	209972310	1.0003	0.982554	1.02388	1.0027	1.01319	1.02737	0.995112	1.0539	0.92895	1.05475	1.04739	1.00672	0.969379	1.00511	1.04687	1.03241	1.00965	0.919523	0.99372	1.02327	1.02624	0.983931	1.014	1.00471	1.02624	1.00783	1.03221	1.00934	0.984029	0.989258	1.01603	1.0028	0.986393	0.985408	0.982652	1.00823	1.02501	1.08806	0.994714	1.0009	0.986788	1.0144	1.01837	1.02173	1.00692	1.00351
339	chr1	209972311	210569208	1.0003	0.982554	1.02388	1.0027	1.01319	1.02737	0.995112	1.0539	0.92895	1.05475	1.04739	1.00672	0.969379	1.00511	1.04687	1.03241	1.00965	0.919523	0.99372	1.02327	1.02624	0.983931	1.014	1.00471	1.02624	1.00783	1.03221	1.00934	0.984029	0.989258	1.01603	1.0028	0.986393	0.985408	0.982652	1.00823	1.02501	1.08806	0.994714	1.0009	0.986788	1.0144	1.01837	1.02173	1.00692	1.00351
340	chr1	210569209	211113375	1.0003	0.982554	1.02388	1.0027	1.01319	1.02737	0.995112	1.0539	0.92895	1.05475	1.04739	1.00672	0.969379	1.00511	1.04687	1.03241	1.00965	0.919523	0.99372	1.02327	1.02624	0.983931	1.014	1.00471	1.02624	1.00783	1.03221	1.00934	0.984029	0.989258	1.01603	1.0028	0.986393	0.985408	0.982652	1.00823	1.02501	1.08806	0.994714	1.0009	0.986788	1.0144	1.01837	1.02173	1.00692	1.00351
341	chr1	211113376	211737059	1.0003	0.982554	1.02388	1.0027	1.01319	1.02737	0.995112	1.0539	0.92895	1.05475	1.04739	1.00672	0.969379	1.00511	1.04687	1.03241	1.00965	0.919523	0.99372	1.02327	1.02624	0.983931	1.014	1.00471	1.02624	1.00783	1.03221	1.00934	0.984029	0.989258	1.01603	1.0028	0.986393	0.985408	0.982652	1.00823	1.02501	1.08806	0.994714	1.0009	0.986788	1.0144	1.01837	1.02173	1.00692	1.00351
342	chr1	211737060	212295514	1.0003	0.982554	1.02388	1.0027	1.01319	1.02737	0.995112	1.0539	0.92895	1.05475	1.04739	1.00672	0.969379	1.00511	1.04687	1.03241	1.00965	0.919523	0.99372	1.02327	1.02624	0.983931	1.014	1.00471	1.02624	1.00783	1.03221	1.00934	0.984029	0.989258	1.01603	1.0028	0.986393	0.985408	0.982652	1.00823	1.02501	1.08806	0.994714	1.0009	0.986788	1.0144	1.01837	1.02173	1.00692	1.00351
343	chr1	212295515	212843078	1.0003	0.982554	1.02388	1.0027	1.01319	1.02737	0.995112	1.0539	0.92895	1.05475	1.04739	1.00672	0.969379	1.00511	1.04687	1.03241	1.00965	0.919523	0.99372	1.02327	1.02624	0.983931	1.014	1.00471	1.02624	1.00783	1.03221	1.00934	0.984029	0.989258	1.01603	1.0028	0.986393	0.985408	0.982652	1.00823	1.02501	1.08806	0.994714	1.0009	0.986788	1.0144	1.01837	1.02173	1.00692	1.00351
344	chr1	212843079	213453370	1.0003	0.982554	1.02388	1.0027	1.01319	1.02737	0.995112	1.0539	0.92895	1.05475	1.04739	1.00672	0.969379	1.00511	1.04687	1.03241	1.00965	0.919523	0.99372	1.02327	1.02624	0.983931	1.014	1.00471	1.02624	1.00783	1.03221	1.00934	0.984029	0.989258	1.01603	1.0028	0.986393	0.985408	0.982652	1.00823	1.02501	1.08806	0.994714	1.0009	0.986788	1.0144	1.01837	1.02173	1.00692	1.00351
345	chr1	213453371	213977040	1.0003	0.982554	1.02388	1.0027	1.01319	1.02737	0.995112	1.0539	0.92895	1.05475	1.04739	1.00672	0.969379	1.00511	1.04687	1.03241	1.00965	0.919523	0.99372	1.02327	1.02624	0.983931	1.014	1.00471	1.02624	1.00783	1.03221	1.00934	0.984029	0.989258	1.01603	1.0028	0.986393	0.985408	0.982652	1.00823	1.02501	1.08806	0.994714	1.0009	0.986788	1.0144	1.01837	1.02173	1.00692	1.00351
346	chr1	213977041	214535485	1.0003	0.982554	1.02388	1.0027	1.01319	1.02737	0.995112	1.0539	0.92895	1.05475	1.04739	1.00672	0.969379	1.00511	1.04687	1.03241	1.00965	0.919523	0.99372	1.02327	1.02624	0.983931	1.014	1.00471	1.02624	1.00783	1.03221	1.00934	0.984029	0.989258	1.01603	1.0028	0.986393	0.985408	0.982652	1.00823	1.02501	1.08806	0.994714	1.0009	0.986788	1.0144	1.01837	1.02173	1.00692	1.00351
347	chr1	214535486	215089277	1.0003	0.982554	1.02388	1.0027	1.01319	1.02737	0.995112	1.0539	0.92895	1.05475	1.04739	1.00672	0.969379	1.00511	1.04687	1.03241	1.00965	0.919523	0.99372	1.02327	1.02624	0.983931	1.014	1.00471	1.02624	1.00783	1.03221	1.00934	0.984029	0.989258	1.01603	1.0028	0.986393	0.985408	0.982652	1.00823	1.02501	1.08806	0.994714	1.0009	0.986788	1.0144	1.01837	1.02173	1.00692	1.00351
348	chr1	215089278	215681761	1.0003	0.982554	1.02388	1.0027	1.01319	1.02737	0.995112	1.0539	0.92895	1.05475	1.04739	1.00672	0.969379	1.00511	1.04687	1.03241	1.00965	0.919523	0.99372	1.02327	1.02624	0.983931	1.014	1.00471	1.02624	1.00783	1.03221	1.00934	0.984029	0.989258	1.01603	1.0028	0.986393	0.985408	0.982652	1.00823	1.02501	1.08806	0.994714	1.0009	0.986788	1.0144	1.01837	1.02173	1.00692	1.00351
349	chr1	215681762	216280180	1.0003	0.406245	1.02388	1.0027	1.01319	1.02737	0.995112	1.0539	0.92895	1.05475	1.04739	1.00672	0.969379	1.00511	1.04687	1.03241	1.00965	0.919523	0.99372	1.02327	1.02624	0.983931	1.014	1.00471	1.02624	1.00783	1.03221	1.00934	0.984029	0.989258	1.01603	1.0028	0.986393	0.985408	0.982652	1.00823	1.02501	1.08806	0.994714	1.0009	0.986788	1.0144	1.01837	1.02173	1.00692	1.00351
350	chr1	216280181	216880564	1.0003	0.406245	1.02388	1.0027	1.01319	1.02737	0.995112	1.0539	1.07433	1.05475	1.04739	1.00672	0.969379	1.00511	1.04687	1.03241	1.00965	0.919523	0.99372	1.02327	1.02624	0.983931	1.014	1.00471	1.02624	1.00783	1.03221	1.00934	0.984029	0.989258	1.01603	1.0028	0.986393	0.985408	0.982652	1.00823	1.02501	1.08806	0.994714	1.0009	0.986788	1.0144	1.01837	1.02173	1.00692	1.00351
351	chr1	216880565	217451991	1.0003	0.406245	1.02388	1.0027	1.01319	1.02737	0.995112	1.0539	1.07433	1.05475	1.04739	1.00672	0.969379	1.00511	1.04687	1.03241	1.00965	0.919523	0.99372	1.02327	1.02624	0.983931	1.014	1.00471	1.02624	1.00783	1.03221	1.00934	0.984029	0.989258	1.01603	1.0028	0.986393	0.985408	0.982652	1.00823	1.02501	1.08806	0.994714	1.0009	0.986788	1.0144	1.01837	1.02173	1.00692	1.00351
352	chr1	217451992	218084258	1.0003	0.929787	1.02388	1.0027	1.01319	1.02737	0.995112	1.0539	1.07433	1.05475	1.04739	1.00672	0.969379	1.00511	1.04687	1.03241	1.00965	0.919523	0.99372	1.02327	1.02624	0.983931	1.014	1.00471	1.02624	1.00783	1.03221	1.00934	0.984029	0.989258	1.01603	1.0028	0.986393	0.985408	0.982652	1.00823	1.02501	1.08806	0.994714	1.0009	0.986788	1.0144	1.01837	1.02173	1.00692	1.00351
353	chr1	218084259	218682061	1.0003	0.929787	1.02388	1.0027	1.01319	1.02737	0.995112	1.0539	1.07433	1.05475	1.04739	1.00672	0.969379	1.00511	1.04687	1.03241	1.00965	0.919523	0.99372	1.02327	1.02624	0.983931	1.014	1.00471	1.02624	1.00783	1.03221	1.00934	0.984029	0.989258	1.01603	1.0028	0.986393	0.985408	0.982652	1.00823	1.02501	1.08806	0.994714	1.0009	0.986788	1.0144	1.01837	1.02173	1.00692	1.00351
354	chr1	218682062	219258094	1.0003	0.929787	1.02388	1.0027	1.01319	1.02737	0.995112	1.0539	1.07433	1.05475	1.04739	1.00672	0.969379	1.00511	1.04687	1.03241	1.00965	0.919523	0.99372	1.02327	1.02624	0.983931	1.014	1.00471	1.02624	1.00783	1.03221	1.00934	0.984029	0.989258	1.01603	1.0028	0.986393	0.985408	0.982652	1.00823	1.02501	1.08806	0.994714	1.0009	0.986788	1.0144	1.01837	1.02173	1.00692	1.00351
355	chr1	219258095	219833362	1.0003	0.929787	1.02388	1.0027	1.01319	1.02737	0.995112	1.0539	1.07433	1.05475	1.04739	1.00672	0.969379	1.00511	1.04687	1.03241	1.00965	0.919523	0.99372	1.02327	1.02624	0.983931	1.014	1.00471	1.02624	1.00783	1.03221	1.00934	0.984029	0.989258	1.01603	1.0028	0.986393	0.985408	0.982652	1.00823	1.02501	1.08806	0.994714	1.0009	0.986788	1.0144	1.01837	1.02173	1.00692	1.00351
356	chr1	219833363	220447539	1.0003	0.929787	1.02388	1.0027	1.01319	1.02737	0.995112	1.0539	1.07433	1.05475	1.04739	1.00672	0.969379	1.00511	1.04687	1.03241	1.00965	0.919523	0.99372	1.02327	1.02624	0.983931	1.014	1.00471	1.02624	1.00783	1.03221	1.00934	0.984029	0.989258	1.01603	1.0028	0.986393	0.985408	0.982652	1.00823	1.02501	1.08806	0.994714	1.0009	0.986788	1.0144	1.01837	1.02173	1.00692	1.00351
357	chr1	220447540	221025085	1.0003	0.929787	1.02388	1.0027	1.01319	1.02737	0.995112	1.0539	1.07433	1.05475	1.04739	1.00672	0.969379	1.00511	1.04687	1.03241	1.00965	0.919523	0.99372	1.02327	1.02624	0.983931	1.014	1.00471	1.02624	1.00783	1.03221	1.00934	0.984029	0.989258	1.01603	1.0028	0.986393	0.985408	0.982652	1.00823	1.02501	1.08806	0.994714	1.0009	0.986788	1.0144	1.01837	1.02173	1.00692	1.00351
358	chr1	221025086	221585829	1.0003	0.929787	1.02388	1.0027	1.01319	1.02737	0.995112	1.0539	1.07433	1.05475	1.04739	1.00672	0.969379	1.00511	1.04687	1.03241	1.00965	0.919523	0.99372	1.02327	1.02624	0.983931	1.014	1.00471	1.02624	1.00783	1.03221	1.00934	0.984029	0.989258	1.01603	1.0028	0.986393	0.985408	0.982652	1.00823	1.02501	1.08806	0.994714	1.0009	0.986788	1.0144	1.01837	1.02173	1.00692	1.00351
359	chr1	221585830	222133484	1.0003	0.929787	1.02388	1.0027	1.01319	1.02737	0.995112	1.0539	1.07433	1.05475	1.04739	1.00672	0.969379	1.00511	1.04687	1.03241	1.00965	0.919523	0.99372	1.02327	1.02624	0.983931	1.014	1.00471	1.02624	1.00783	1.03221	1.00934	0.984029	0.989258	1.01603	1.0028	0.986393	0.985408	0.982652	1.00823	1.02501	1.08806	0.994714	1.0009	0.986788	1.0144	1.01837	1.02173	1.00692	1.00351
360	chr1	222133485	222667122	1.0003	0.929787	1.02388	1.0027	1.01319	1.02737	0.995112	1.0539	1.07433	1.05475	1.04739	1.00672	0.969379	1.00511	1.04687	1.03241	1.00965	0.919523	0.99372	1.02327	1.02624	0.983931	1.014	1.00471	1.02624	1.00783	1.03221	1.00934	0.984029	0.989258	1.01603	1.0028	0.986393	0.985408	0.982652	1.00823	1.02501	1.08806	0.994714	1.0009	0.986788	1.0144	1.01837	1.02173	1.00692	1.00351
361	chr1	222667123	223250402	1.0003	0.929787	1.02388	1.0027	1.01319	1.02737	0.995112	1.0539	1.07433	1.05475	1.04739	1.00672	0.969379	1.00511	1.04687	1.03241	1.00965	0.919523	0.99372	1.02327	1.02624	0.983931	1.014	1.00471	1.02624	1.00783	1.03221	1.00934	0.984029	0.989258	1.01603	1.0028	0.986393	0.985408	0.982652	1.00823	1.02501	1.08806	0.994714	1.0009	0.986788	1.0144	1.01837	1.02173	1.00692	1.00351
362	chr1	223250403	223833477	1.0003	0.929787	1.02388	1.0027	1.01319	1.02737	0.995112	1.0539	1.07433	1.05475	1.04739	1.00672	0.969379	1.00511	1.04687	1.03241	1.00965	0.919523	0.99372	1.02327	1.02624	0.983931	1.014	1.00471	1.02624	1.00783	1.03221	1.00934	0.984029	0.989258	1.01603	1.0028	0.986393	0.985408	0.982652	1.00823	1.02501	1.08806	0.994714	1.0009	0.986788	1.0144	1.01837	1.02173	1.00692	1.00351
363	chr1	223833478	224337984	1.0003	0.929787	1.02388	1.0027	1.01319	1.02737	0.995112	1.0539	1.07433	1.05475	1.04739	1.00672	0.969379	1.00511	1.04687	1.03241	1.00965	0.919523	0.99372	1.02327	1.02624	0.983931	1.014	1.00471	1.02624	1.00783	1.03221	1.00934	0.984029	0.989258	1.01603	1.0028	0.986393	0.985408	0.982652	1.00823	1.02501	1.08806	0.994714	1.0009	0.986788	1.0144	1.01837	1.02173	1.00692	1.00351
364	chr1	224337985	224889289	1.0003	0.929787	1.02388	1.0027	1.01319	1.02737	0.995112	1.0539	1.07433	1.05475	1.04739	1.00672	0.969379	1.00511	1.04687	1.03241	1.00965	0.919523	0.99372	1.02327	1.02624	0.983931	1.014	1.00471	1.02624	1.00783	1.03221	1.00934	0.984029	0.989258	1.01603	1.0028	0.986393	0.985408	0.982652	1.00823	1.02501	1.08806	0.994714	1.0009	0.986788	1.0144	1.01837	1.02173	1.00692	1.00351
365	chr1	224889290	225487471	1.0003	0.929787	1.02388	1.0027	1.01319	1.02737	0.995112	1.0539	1.07433	1.05475	1.04739	1.00672	0.969379	1.00511	1.04687	1.03241	1.00965	0.919523	0.99372	1.02327	1.02624	0.983931	1.014	1.00471	1.02624	1.00783	1.03221	1.00934	0.984029	0.989258	1.01603	1.0028	0.986393	0.985408	0.982652	1.00823	1.02501	1.08806	0.994714	1.0009	0.986788	1.0144	1.01837	1.02173	1.00692	1.00351
366	chr1	225487472	226048750	1.0003	0.929787	1.02388	1.0027	1.01319	1.02737	0.995112	1.0539	1.07433	1.05475	1.04739	1.00672	0.969379	1.00511	1.04687	1.03241	1.00965	0.919523	0.99372	1.02327	1.02624	0.983931	1.014	1.00471	1.02624	1.00783	1.03221	1.00934	0.984029	0.989258	1.01603	1.0028	0.986393	0.985408	0.982652	1.00823	1.02501	1.08806	0.994714	1.0009	0.986788	1.0144	1.01837	1.02173	1.00692	1.00351
367	chr1	226048751	226609263	1.0003	0.929787	1.02388	1.0027	1.01319	1.02737	0.995112	1.0539	1.07433	1.05475	1.04739	1.00672	0.969379	1.00511	1.04687	1.03241	1.00965	0.919523	0.99372	1.02327	1.02624	0.983931	1.014	1.00471	1.02624	1.00783	1.03221	1.00934	0.984029	0.989258	1.01603	1.0028	0.986393	0.985408	0.982652	1.00823	1.02501	1.08806	0.994714	1.0009	0.986788	1.0144	1.01837	1.02173	1.00692	1.00351
368	chr1	226609264	227114271	1.0003	0.929787	1.02388	1.0027	1.01319	1.02737	0.995112	1.0539	1.07433	1.05475	1.04739	1.00672	0.969379	1.00511	1.04687	1.03241	1.00965	0.919523	0.99372	1.02327	1.02624	0.983931	1.014	1.00471	1.02624	1.00783	1.03221	1.00934	0.984029	0.989258	1.01603	1.0028	0.986393	0.985408	0.982652	1.00823	1.02501	1.08806	0.994714	1.0009	0.986788	1.0144	1.01837	1.02173	1.00692	1.00351
369	chr1	227114272	227724540	1.0003	0.929787	1.02388	1.0027	1.01319	1.02737	0.995112	1.0539	1.07433	1.05475	1.04739	1.00672	0.969379	1.00511	1.04687	1.03241	1.00965	0.919523	0.99372	1.02327	1.02624	0.983931	1.014	1.00471	1.02624	1.00783	1.03221	1.00934	0.984029	0.989258	1.01603	1.0028	0.986393	0.985408	0.982652	1.00823	1.02501	1.08806	0.994714	1.0009	0.986788	1.0144	1.01837	1.02173	1.00692	1.00351
370	chr1	227724541	228300742	1.0003	0.929787	1.02388	1.0027	1.01319	1.02737	0.995112	1.0539	1.07433	1.05475	1.04739	1.00672	0.969379	1.00511	1.04687	1.03241	1.00965	0.919523	0.99372	1.02327	1.02624	0.983931	1.014	1.00471	1.02624	1.00783	1.03221	1.00934	0.984029	0.989258	1.01603	1.0028	0.986393	0.985408	0.982652	1.00823	1.02501	1.08806	0.994714	1.0009	0.986788	1.0144	1.01837	1.02173	1.00692	1.00351
371	chr1	228300743	228900282	1.0003	0.929787	1.02388	1.0027	1.01319	1.02737	0.995112	1.0539	1.07433	1.05475	1.04739	1.00672	0.969379	1.00511	1.04687	1.03241	1.00965	0.919523	0.99372	1.02327	1.02624	0.983931	1.014	1.00471	1.02624	1.00783	1.03221	1.00934	0.984029	0.989258	1.01603	1.0028	0.986393	0.985408	0.982652	1.00823	1.02501	1.08806	0.994714	1.0009	0.986788	1.0144	1.01837	1.02173	1.00692	1.00351
372	chr1	228900283	229413963	1.0003	0.929787	1.02388	1.0027	1.01319	1.02737	0.995112	1.0539	1.07433	1.05475	1.04739	1.00672	0.969379	1.00511	1.04687	1.03241	1.00965	0.919523	0.99372	1.02327	1.02624	0.983931	1.014	1.00471	1.02624	1.00783	1.03221	1.00934	0.984029	0.989258	1.01603	1.0028	0.986393	0.985408	0.982652	1.00823	1.02501	1.08806	0.994714	1.0009	0.986788	1.0144	1.01837	1.02173	1.00692	1.00351
373	chr1	229413964	229979436	1.0003	0.929787	1.02388	1.0027	1.01319	1.02737	0.995112	1.0539	1.07433	1.05475	1.04739	1.00672	0.969379	1.00511	1.04687	1.03241	1.00965	0.919523	0.99372	1.02327	1.02624	0.983931	1.014	1.00471	1.02624	1.00783	1.03221	1.00934	0.984029	0.989258	1.01603	1.0028	0.986393	0.985408	0.982652	1.00823	1.02501	1.08806	0.994714	1.0009	0.986788	1.0144	1.01837	1.02173	1.00692	1.00351
374	chr1	229979437	230498643	1.0003	0.929787	1.02388	1.0027	1.01319	1.02737	0.995112	1.0539	1.07433	1.05475	1.04739	1.00672	0.969379	1.00511	1.04687	1.03241	1.00965	0.919523	0.99372	1.02327	1.02624	0.983931	1.014	1.00471	1.02624	1.00783	1.03221	1.00934	0.984029	0.989258	1.01603	1.0028	0.986393	0.985408	0.982652	1.00823	1.02501	1.08806	0.994714	1.0009	0.986788	1.0144	1.01837	1.02173	1.00692	1.00351
375	chr1	230498644	231022031	1.0003	0.929787	1.02388	1.0027	1.01319	1.02737	0.995112	1.0539	1.07433	1.05475	1.04739	1.00672	0.969379	1.00511	1.04687	1.03241	1.00965	0.919523	0.99372	1.02327	1.02624	0.983931	1.014	1.00471	1.02624	1.00783	1.03221	1.00934	0.984029	0.989258	1.01603	1.0028	0.986393	0.985408	0.982652	1.00823	1.02501	1.08806	0.994714	1.0009	0.986788	1.0144	1.01837	1.02173	1.00692	1.00351
376	chr1	231022032	231580613	1.0003	0.929787	1.02388	1.0027	1.01319	1.02737	0.995112	1.0539	1.07433	1.05475	1.04739	1.00672	0.969379	1.00511	1.04687	1.03241	1.00965	0.919523	0.99372	1.02327	1.02624	0.983931	1.014	1.00471	1.02624	1.00783	1.03221	1.00934	0.984029	0.989258	1.01603	1.0028	0.986393	0.985408	0.982652	1.00823	1.02501	1.08806	0.994714	1.0009	0.986788	1.0144	1.01837	1.02173	1.00692	1.00351
377	chr1	231580614	232134928	1.0003	0.929787	1.02388	1.0027	1.01319	1.02737	0.995112	1.0539	1.07433	1.05475	1.04739	1.00672	0.622321	1.00511	1.04687	1.03241	1.00965	0.919523	0.99372	1.02327	1.02624	0.983931	1.014	1.00471	1.02624	1.00783	1.03221	1.00934	0.984029	0.989258	1.01603	1.0028	0.986393	0.985408	0.982652	1.00823	1.02501	1.08806	0.994714	1.0009	0.986788	1.0144	1.01837	1.02173	1.00692	1.00351
378	chr1	232134929	232692731	1.0003	0.929787	1.02388	1.0027	1.01319	1.02737	0.995112	1.0539	1.07433	1.05475	1.04739	1.00672	0.622321	1.00511	1.04687	1.03241	1.00965	0.919523	0.99372	1.02327	1.02624	0.983931	1.014	1.00471	1.02624	1.00783	1.03221	1.00934	0.984029	1.19041	1.01603	1.0028	0.986393	0.985408	0.982652	1.00823	1.02501	1.08806	0.994714	1.0009	0.986788	1.0144	1.01837	1.02173	1.00692	1.00351
379	chr1	232692732	233240245	1.0003	0.929787	1.02388	1.0027	1.01319	1.02737	0.995112	1.0539	1.07433	1.05475	1.04739	1.00672	0.622321	1.00511	1.04687	1.03241	1.00965	0.919523	0.99372	1.02327	1.02624	0.983931	1.014	1.00471	1.02624	1.00783	1.03221	1.00934	0.984029	1.19041	1.01603	1.0028	0.986393	0.985408	0.982652	1.00823	1.02501	1.08806	0.994714	1.0009	0.986788	1.0144	1.01837	1.02173	1.00692	1.00351
380	chr1	233240246	233825485	1.0003	0.929787	1.02388	1.0027	1.01319	1.02737	0.995112	1.0539	1.07433	1.05475	1.04739	1.00672	0.622321	1.00511	1.04687	1.03241	1.00965	0.919523	0.99372	1.02327	1.02624	0.983931	1.014	1.00471	1.02624	1.00783	1.03221	1.00934	0.984029	1.19041	1.01603	1.0028	0.986393	0.985408	0.982652	1.00823	1.02501	1.08806	0.994714	1.0009	0.986788	1.0144	1.01837	1.02173	1.00692	1.00351
381	chr1	233825486	234420944	1.0003	0.929787	1.02388	1.0027	1.01319	1.02737	0.995112	1.0539	1.07433	1.05475	1.04739	1.00672	0.622321	1.00511	1.04687	1.03241	1.00965	0.919523	0.99372	1.02327	1.02624	0.983931	1.014	1.00471	1.02624	1.00783	1.03221	1.00934	0.984029	1.19041	1.01603	1.0028	0.986393	0.985408	0.982652	1.00823	1.02501	1.08806	0.994714	1.0009	0.986788	1.0144	1.01837	1.02173	1.00692	1.00351
382	chr1	234420945	234928176	1.0003	0.929787	1.02388	1.0027	1.01319	1.02737	0.995112	1.0539	1.07433	1.05475	1.04739	1.00672	1.09111	1.00511	1.04687	1.03241	1.00965	1.10374	0.99372	1.02327	1.02624	0.983931	1.014	1.00471	1.02624	1.00783	1.03221	1.00934	0.984029	1.19041	1.01603	1.0028	0.986393	0.985408	0.982652	1.00823	1.02501	1.08806	0.994714	1.0009	0.986788	1.0144	1.01837	1.02173	1.00692	1.00351
383	chr1	234928177	235499192	1.0003	0.929787	1.02388	1.0027	1.01319	1.02737	0.995112	1.0539	1.07433	1.05475	1.04739	1.00672	1.09111	1.00511	1.04687	1.03241	1.00965	1.10374	0.99372	1.02327	1.02624	0.983931	1.014	1.00471	1.02624	1.00783	1.03221	1.00934	0.984029	1.19041	1.01603	1.0028	0.986393	0.985408	0.982652	1.00823	1.02501	1.08806	0.994714	1.0009	0.986788	1.0144	1.01837	1.02173	1.00692	1.00351
384	chr1	235499193	236083770	1.0003	0.929787	1.02388	1.0027	1.01319	1.02737	0.995112	1.0539	1.07433	1.05475	1.04739	1.00672	1.09111	1.00511	1.04687	1.03241	1.00965	1.10374	0.99372	1.02327	1.02624	0.983931	1.014	1.00471	1.02624	1.00783	1.03221	1.00934	0.984029	1.19041	1.01603	1.0028	0.986393	0.985408	0.982652	1.00823	1.02501	1.08806	0.994714	1.0009	0.986788	1.0144	1.01837	1.02173	1.00692	1.00351
385	chr1	236083771	236652841	1.0003	0.929787	1.02388	1.0027	1.01319	1.02737	0.995112	1.0539	1.07433	1.05475	1.04739	1.00672	1.09111	1.00511	1.04687	1.03241	1.00965	1.10374	0.99372	1.02327	1.02624	0.983931	1.014	1.00471	1.02624	1.00783	1.03221	1.00934	0.984029	1.19041	1.01603	1.0028	0.986393	0.985408	0.982652	1.00823	1.02501	1.08806	0.994714	1.0009	0.986788	1.0144	1.01837	1.02173	1.00692	1.00351
386	chr1	236652842	237249595	1.0003	0.929787	1.02388	1.0027	1.01319	1.02737	1.32631	1.0539	1.07433	1.05475	1.04739	1.00672	1.09111	1.00511	1.04687	1.03241	1.00965	1.10374	0.99372	1.02327	1.02624	0.983931	1.014	1.00471	1.02624	1.00783	1.03221	1.00934	0.984029	1.19041	1.01603	1.0028	0.986393	0.985408	0.982652	1.00823	1.02501	1.08806	0.994714	1.0009	0.986788	1.0144	1.01837	1.02173	1.00692	1.00351
387	chr1	237249596	237888224	1.0003	0.929787	1.02388	1.0027	1.01319	1.02737	1.32631	1.0539	1.07433	1.05475	1.04739	1.00672	1.09111	1.00511	1.04687	1.03241	1.00965	1.10374	0.99372	1.02327	1.02624	0.983931	1.014	1.00471	1.02624	1.00783	1.03221	1.00934	0.984029	1.19041	1.01603	1.0028	0.986393	0.985408	0.982652	1.00823	1.02501	1.08806	0.994714	1.0009	0.986788	1.0144	1.01837	1.02173	1.00692	1.00351
388	chr1	237888225	238479387	1.0003	0.929787	1.02388	1.0027	1.01319	1.02737	1.32631	1.0539	1.07433	1.05475	1.04739	1.00672	1.09111	1.00511	1.04687	1.03241	1.00965	1.10374	0.99372	1.02327	1.02624	0.983931	1.014	1.00471	1.02624	1.00783	1.03221	1.00934	0.984029	1.19041	1.01603	1.0028	0.986393	0.985408	0.982652	1.00823	1.02501	1.08806	0.994714	1.0009	0.986788	1.0144	1.01837	1.02173	1.00692	1.00351
389	chr1	238479388	239131960	1.0003	0.929787	1.02388	1.0027	1.01319	1.02737	1.32631	1.0539	1.07433	1.05475	1.04739	1.00672	1.09111	1.00511	1.04687	1.03241	1.00965	1.10374	0.99372	1.02327	1.02624	0.983931	1.014	1.00471	1.02624	1.00783	1.03221	1.00934	0.984029	1.19041	1.01603	1.0028	0.986393	0.985408	0.982652	1.00823	1.02501	1.08806	0.994714	1.0009	0.986788	1.0144	1.01837	1.02173	1.00692	1.00351
390	chr1	239131961	239729365	1.0003	0.929787	1.02388	1.0027	1.01319	1.02737	1.32631	1.0539	1.07433	1.05475	1.04739	1.00672	1.09111	1.00511	1.04687	1.03241	1.00965	1.10374	0.99372	1.02327	1.02624	0.983931	1.014	1.00471	1.02624	1.00783	1.03221	1.00934	0.984029	1.19041	1.01603	1.0028	0.986393	0.985408	0.982652	1.00823	1.02501	1.08806	0.994714	1.0009	0.986788	1.0144	1.01837	1.02173	1.00692	1.00351
391	chr1	239729366	240310752	1.0003	0.929787	1.02388	1.0027	1.01319	1.02737	1.32631	1.0539	1.07433	1.05475	1.04739	1.00672	1.09111	1.00511	1.04687	1.03241	1.00965	1.10374	0.99372	1.02327	1.02624	0.983931	1.014	1.00471	1.02624	1.00783	1.03221	1.00934	0.984029	1.19041	1.01603	1.0028	0.986393	0.985408	0.982652	1.00823	1.02501	1.08806	0.994714	1.0009	0.986788	1.0144	1.01837	1.02173	1.00692	1.00351
392	chr1	240310753	240866943	1.0003	0.929787	1.02388	1.0027	1.01319	1.02737	1.32631	1.0539	1.07433	1.05475	1.04739	1.00672	1.09111	1.00511	1.04687	1.03241	1.00965	1.10374	0.99372	1.02327	1.02624	0.983931	1.014	1.00471	1.02624	1.00783	1.03221	1.00934	0.984029	1.19041	1.01603	1.0028	0.986393	0.985408	0.982652	1.00823	1.02501	1.08806	0.994714	1.0009	0.986788	1.0144	1.01837	1.02173	1.00692	1.00351
393	chr1	240866944	241452746	1.0003	0.929787	1.02388	1.0027	1.01319	1.02737	1.32631	1.0539	1.07433	1.05475	1.04739	1.00672	1.09111	1.00511	1.04687	1.03241	1.00965	1.10374	0.99372	1.02327	1.02624	0.983931	1.014	1.00471	1.02624	1.00783	1.03221	1.00934	0.984029	1.19041	1.01603	1.0028	0.986393	0.985408	0.982652	1.00823	1.02501	1.08806	0.994714	1.0009	0.986788	1.0144	1.01837	1.02173	1.00692	1.00351
394	chr1	241452747	242061198	1.0003	0.929787	1.02388	1.0027	1.01319	1.02737	1.32631	1.0539	1.07433	1.05475	1.04739	1.00672	1.09111	1.00511	1.04687	1.03241	1.00965	1.10374	0.99372	1.02327	1.02624	0.983931	1.014	1.00471	1.02624	1.00783	1.03221	1.00934	0.984029	1.19041	1.01603	1.0028	0.986393	0.985408	0.982652	1.00823	1.02501	1.08806	0.994714	1.0009	0.986788	1.0144	1.01837	1.02173	1.00692	1.00351
395	chr1	242061199	242635007	1.0003	0.929787	1.02388	1.0027	1.01319	1.02737	1.32631	1.0539	1.07433	1.05475	1.04739	1.00672	1.09111	1.00511	1.04687	1.03241	1.00965	1.10374	0.99372	1.02327	1.02624	0.983931	1.014	1.00471	1.02624	1.00783	1.03221	1.00934	0.984029	1.19041	1.01603	1.0028	0.986393	0.985408	0.982652	1.00823	1.02501	1.08806	0.994714	1.0009	0.986788	1.0144	1.01837	1.02173	1.00692	1.00351
396	chr1	242635008	243217070	1.0003	0.929787	1.02388	1.0027	1.01319	1.02737	1.32631	1.0539	1.07433	1.05475	1.04739	1.00672	1.09111	1.00511	1.04687	1.03241	1.00965	1.10374	0.99372	1.02327	1.02624	0.983931	1.014	1.00471	1.02624	1.00783	1.03221	1.00934	0.984029	1.19041	1.01603	1.0028	0.986393	0.985408	0.982652	1.00823	1.02501	1.08806	0.994714	1.0009	0.986788	1.0144	1.01837	1.02173	1.00692	1.00351
397	chr1	243217071	243791329	1.0003	0.929787	1.02388	1.0027	1.01319	1.02737	1.32631	1.0539	1.07433	1.05475	1.04739	1.00672	1.09111	1.00511	1.04687	1.03241	1.00965	1.10374	0.99372	1.02327	1.02624	0.983931	1.014	1.00471	1.02624	1.00783	1.03221	1.00934	0.984029	1.19041	1.01603	1.0028	0.986393	0.985408	0.982652	1.00823	1.02501	1.08806	0.994714	1.0009	0.986788	1.0144	1.01837	1.02173	1.00692	1.00351
398	chr1	243791330	244337701	1.0003	0.929787	1.02388	1.0027	1.01319	1.02737	1.32631	1.0539	1.07433	1.05475	1.04739	1.00672	1.09111	1.00511	1.04687	1.03241	1.00965	1.10374	0.99372	1.02327	1.02624	0.983931	1.014	1.00471	1.02624	1.00783	1.03221	1.00934	0.984029	1.19041	1.01603	1.0028	0.986393	0.985408	0.982652	1.00823	1.02501	1.08806	0.994714	1.0009	0.986788	1.0144	1.01837	1.02173	1.00692	1.00351
399	chr1	244337702	244909639	1.0003	0.929787	1.02388	1.0027	1.01319	1.02737	1.32631	1.0539	1.07433	1.05475	1.04739	1.00672	1.09111	1.00511	1.04687	1.03241	1.00965	1.10374	0.99372	1.02327	1.02624	0.983931	1.014	1.00471	1.02624	1.00783	1.03221	1.00934	0.984029	1.19041	1.01603	1.0028	0.986393	0.985408	0.982652	1.00823	1.02501	1.08806	0.994714	1.0009	0.986788	1.0144	1.01837	1.02173	1.00692	1.00351
400	chr1	244909640	245477991	1.0003	0.929787	1.02388	1.0027	1.01319	1.02737	1.32631	1.0539	1.07433	1.05475	1.04739	1.00672	1.09111	1.00511	1.04687	1.03241	1.00965	1.10374	0.99372	1.02327	1.02624	0.983931	1.014	1.00471	1.02624	1.00783	1.03221	1.00934	0.984029	1.19041	1.01603	1.0028	0.986393	0.985408	0.982652	1.00823	1.02501	1.08806	0.994714	1.0009	0.986788	1.0144	1.01837	1.02173	1.00692	1.00351
401	chr1	245477992	246008178	1.0003	0.929787	1.02388	1.0027	1.01319	1.02737	1.32631	1.0539	1.07433	1.05475	1.04739	1.00672	1.09111	1.00511	1.04687	1.03241	1.00965	1.10374	0.99372	1.02327	1.02624	0.983931	1.014	1.00471	1.02624	1.00783	1.03221	1.00934	0.984029	1.19041	1.01603	1.0028	0.986393	0.985408	0.982652	1.00823	1.02501	1.08806	0.994714	1.0009	0.986788	1.0144	1.01837	1.02173	1.00692	1.00351
402	chr1	246008179	246605588	1.0003	0.929787	1.02388	1.0027	1.01319	1.02737	1.32631	1.0539	1.07433	1.05475	1.04739	1.00672	1.09111	1.00511	1.04687	1.03241	1.00965	1.10374	0.99372	1.02327	1.02624	0.983931	1.014	1.00471	1.02624	1.00783	1.03221	1.00934	0.984029	1.19041	1.01603	1.0028	0.986393	0.985408	0.982652	1.00823	1.02501	1.08806	0.994714	1.0009	0.986788	1.0144	1.01837	1.02173	1.00692	1.00351
403	chr1	246605589	247217124	1.0003	0.929787	1.02388	1.0027	1.01319	1.02737	1.32631	1.0539	1.07433	1.05475	1.04739	1.00672	1.09111	1.00511	1.04687	1.03241	1.00965	1.10374	0.99372	1.02327	1.02624	0.983931	1.014	1.00471	1.02624	1.00783	1.03221	1.00934	0.984029	1.19041	1.01603	1.0028	0.986393	0.985408	0.982652	1.00823	1.02501	1.08806	0.994714	1.0009	0.986788	1.0144	1.01837	1.02173	1.00692	1.00351
404	chr1	247217125	247822196	1.0003	0.929787	1.02388	1.0027	1.01319	1.02737	1.32631	1.0539	1.07433	1.05475	1.04739	1.00672	1.09111	1.00511	1.04687	1.03241	1.00965	1.10374	0.99372	1.02327	1.02624	0.983931	1.014	1.00471	1.02624	1.00783	1.03221	1.00934	0.984029	1.19041	1.01603	1.0028	0.986393	0.985408	0.982652	1.00823	1.02501	1.08806	0.994714	1.0009	0.986788	1.0144	1.01837	1.02173	1.00692	1.00351
405	chr1	247822197	248521468	1.0003	0.929787	1.02388	1.0027	1.01319	1.02737	1.32631	1.0539	1.07433	1.05475	1.04739	1.00672	1.09111	1.00511	1.04687	1.03241	1.00965	1.10374	0.99372	1.02327	1.02624	0.983931	1.014	1.00471	1.02624	1.00783	1.03221	1.00934	0.984029	1.19041	1.01603	1.0028	0.986393	0.985408	0.982652	1.00823	1.02501	1.08806	0.994714	1.0009	0.986788	1.0144	1.01837	1.02173	1.00692	1.00351
406	chr1	248521469	249250621	1.0003	0.929787	1.02388	1.0027	1.01319	1.02737	1.32631	1.0539	1.07433	1.05475	1.04739	1.00672	1.09111	1.00511	1.04687	1.03241	1.00965	1.10374	0.99372	1.02327	1.02624	0.983931	1.014	1.00471	1.02624	1.00783	1.03221	1.00934	0.984029	1.19041	1.01603	1.0028	0.986393	0.985408	0.982652	1.00823	1.02501	1.08806	0.994714	1.0009	0.986788	1.0144	1.01837	1.02173	1.00692	1.00351
407	chr2	1	612530	1.03004	0.873978	1.0141	1.02644	0.980591	1.03138	1.0008	1.04865	1.04896	0.997503	0.980395	1.0026	0.998901	0.998102	1.02041	1.0203	1.02583	1.02665	0.990446	1.01613	1.01035	1.13974	1.00371	0.979611	1.02	1.02757	0.970154	1.02337	0.972486	1.05781	1.0319	0.96996	1.01197	0.994117	1.0246	1.02122	1.001	0.981179	0.986985	1	0.940259	0.997104	1.0203	0.972486	0.973167	0.971416
408	chr2	612531	1250706	1.03004	0.873978	1.0141	1.02644	0.980591	1.03138	1.0008	1.04865	1.04896	0.997503	0.980395	1.0026	0.998901	0.998102	1.02041	1.0203	1.02583	1.02665	0.990446	1.01613	1.01035	1.13974	1.00371	0.979611	1.02	1.02757	0.970154	1.02337	0.972486	1.05781	1.0319	0.96996	1.01197	0.994117	1.0246	1.02122	1.001	0.981179	0.986985	1	0.940259	0.997104	1.0203	0.972486	0.973167	0.971416
409	chr2	1250707	1830041	1.03004	0.873978	1.0141	1.02644	0.980591	1.03138	1.0008	1.04865	1.04896	0.997503	0.980395	1.0026	0.998901	0.998102	1.02041	1.0203	1.02583	1.02665	0.990446	1.01613	1.01035	1.13974	1.00371	0.979611	1.02	1.02757	0.970154	1.02337	0.972486	1.05781	1.0319	0.96996	1.01197	0.994117	1.0246	1.02122	1.001	0.981179	0.986985	1	0.940259	0.997104	1.0203	0.972486	0.973167	0.971416
410	chr2	1830042	2387486	1.03004	0.873978	1.0141	1.02644	0.980591	1.03138	1.0008	1.04865	1.04896	0.997503	0.980395	1.0026	0.998901	0.998102	1.02041	1.0203	1.02583	1.02665	0.990446	1.01613	1.01035	1.13974	1.00371	0.979611	1.02	1.02757	0.970154	1.02337	0.972486	1.05781	1.0319	0.96996	1.01197	0.994117	1.0246	1.02122	1.001	0.981179	0.986985	1	0.940259	0.997104	1.0203	0.972486	0.973167	0.971416
411	chr2	2387487	2961455	1.03004	0.873978	1.0141	1.02644	0.980591	1.03138	1.0008	1.04865	1.04896	0.997503	0.980395	1.0026	0.998901	0.998102	1.02041	1.0203	1.02583	1.02665	0.990446	1.01613	1.01035	1.13974	1.00371	0.979611	1.02	1.02757	0.970154	1.02337	0.972486	1.05781	1.0319	0.96996	1.01197	0.994117	1.0246	1.02122	1.001	0.981179	0.986985	1	0.940259	0.997104	1.0203	0.972486	0.973167	0.971416
412	chr2	2961456	3587185	1.03004	0.873978	1.0141	1.02644	0.980591	1.03138	1.0008	1.04865	1.04896	0.997503	0.980395	1.0026	0.998901	0.998102	1.02041	1.0203	1.02583	1.02665	0.990446	1.01613	1.01035	1.13974	1.00371	0.979611	1.02	1.02757	0.970154	1.02337	0.972486	1.05781	1.0319	0.96996	1.01197	0.994117	1.0246	1.02122	1.001	0.981179	0.986985	1	0.940259	0.997104	1.0203	0.972486	0.973167	0.971416
413	chr2	3587186	4161088	1.03004	0.873978	1.0141	1.02644	0.980591	1.03138	1.0008	1.04865	1.04896	0.997503	0.980395	1.0026	0.998901	0.998102	1.02041	1.0203	1.02583	1.02665	0.990446	1.01613	1.01035	1.13974	1.00371	0.979611	1.02	1.02757	0.970154	1.02337	0.972486	1.05781	1.0319	0.96996	1.01197	0.994117	1.0246	1.02122	1.001	0.981179	0.986985	1	0.940259	0.997104	1.0203	0.972486	0.973167	0.971416
414	chr2	4161089	4792342	1.03004	0.873978	1.0141	1.02644	0.980591	1.03138	1.0008	1.04865	1.04896	0.997503	0.980395	1.0026	0.998901	0.998102	1.02041	1.0203	1.02583	1.02665	0.990446	1.01613	1.01035	1.13974	1.00371	0.979611	1.02	1.02757	0.970154	1.02337	0.972486	1.05781	1.0319	0.96996	1.01197	0.994117	1.0246	1.02122	1.001	0.981179	0.986985	1	0.940259	0.997104	1.0203	0.972486	0.973167	0.971416
415	chr2	4792343	5530792	1.03004	0.873978	1.0141	1.02644	0.980591	1.03138	1.0008	1.04865	1.04896	0.997503	0.980395	1.0026	0.998901	0.998102	1.02041	1.0203	1.02583	1.02665	0.990446	1.01613	1.01035	1.13974	1.00371	0.979611	1.02	1.02757	0.970154	1.02337	0.972486	1.05781	1.0319	0.96996	1.01197	0.994117	1.0246	1.02122	1.001	0.981179	0.986985	1	0.940259	0.997104	1.0203	0.972486	0.973167	0.971416
416	chr2	5530793	6119991	1.03004	1.24147	1.0141	1.02644	0.980591	1.03138	1.0008	1.04865	1.04896	0.997503	0.980395	1.0026	0.998901	0.998102	1.02041	1.0203	1.02583	1.02665	0.990446	1.01613	1.01035	1.13974	1.00371	0.979611	1.02	1.02757	0.970154	1.02337	0.972486	1.05781	1.0319	0.96996	1.01197	0.994117	1.0246	1.02122	1.001	0.981179	0.986985	1	0.940259	0.997104	1.0203	0.972486	0.973167	0.971416
417	chr2	6119992	6723426	1.03004	1.24147	1.0141	1.02644	0.980591	1.03138	1.0008	1.04865	1.04896	0.997503	0.980395	1.0026	0.998901	0.998102	1.02041	1.0203	1.02583	1.02665	0.990446	1.01613	1.01035	1.13974	1.00371	0.979611	1.02	1.02757	0.970154	1.02337	0.972486	1.05781	1.0319	0.96996	1.01197	0.994117	1.0246	1.02122	1.001	0.981179	0.986985	1	0.940259	0.997104	1.0203	0.972486	0.973167	0.971416
418	chr2	6723427	7275270	1.03004	1.24147	1.0141	1.02644	0.980591	1.03138	1.0008	1.04865	1.04896	0.997503	0.980395	1.0026	0.998901	0.998102	1.02041	1.0203	1.02583	1.02665	0.990446	1.01613	1.01035	1.13974	1.00371	0.979611	1.02	1.02757	0.970154	1.02337	0.972486	1.05781	1.0319	0.96996	1.01197	0.994117	1.0246	1.02122	1.001	0.981179	0.986985	1	0.940259	0.997104	1.0203	0.972486	0.973167	0.971416
419	chr2	7275271	7842626	1.03004	1.24147	1.0141	1.02644	0.980591	1.03138	1.0008	1.04865	1.04896	0.997503	0.980395	1.0026	0.998901	0.998102	1.02041	1.0203	1.02583	1.02665	0.990446	1.01613	1.01035	1.13974	1.00371	0.979611	1.02	1.02757	0.970154	1.02337	0.972486	1.05781	1.0319	0.96996	1.01197	0.994117	1.0246	1.02122	1.001	0.981179	0.986985	1	0.940259	0.997104	1.0203	0.972486	0.973167	0.971416
420	chr2	7842627	8386014	1.03004	1.24147	1.0141	1.02644	0.980591	1.03138	1.0008	1.04865	1.04896	0.997503	0.980395	1.0026	0.998901	0.998102	1.02041	1.0203	1.02583	1.02665	0.990446	1.01613	1.01035	1.13974	1.00371	0.979611	1.02	1.02757	0.970154	1.02337	0.972486	1.05781	1.0319	0.96996	1.01197	0.994117	1.0246	1.02122	1.001	0.981179	0.986985	1	0.940259	0.997104	1.0203	0.972486	0.973167	0.971416
421	chr2	8386015	8903811	1.03004	1.24147	1.0141	1.02644	0.980591	1.03138	1.0008	1.04865	1.04896	0.997503	0.980395	1.0026	0.998901	0.998102	1.02041	1.0203	1.02583	1.02665	0.990446	1.01613	1.01035	1.13974	1.00371	0.979611	1.02	1.02757	0.970154	1.02337	0.972486	1.05781	1.0319	0.96996	1.01197	0.994117	1.0246	1.02122	1.001	0.981179	0.986985	1	0.940259	0.997104	1.0203	0.972486	0.973167	0.971416
422	chr2	8903812	9430458	1.03004	1.24147	1.0141	1.02644	0.980591	1.03138	1.0008	1.04865	1.04896	0.997503	0.980395	1.0026	0.998901	0.998102	1.02041	1.0203	1.02583	1.02665	0.990446	1.01613	1.01035	1.13974	1.00371	0.979611	1.02	1.02757	0.970154	1.02337	0.972486	1.05781	1.0319	0.96996	1.01197	0.994117	1.0246	1.02122	1.001	0.981179	0.986985	1	0.940259	0.997104	1.0203	0.972486	0.973167	0.971416
423	chr2	9430459	9945760	1.03004	1.24147	1.0141	1.02644	0.980591	1.03138	1.0008	1.04865	1.04896	0.997503	0.980395	1.0026	0.998901	0.998102	1.02041	1.0203	1.02583	1.02665	0.990446	1.01613	1.01035	1.13974	1.00371	0.979611	1.02	1.02757	0.970154	1.02337	0.972486	1.05781	1.0319	0.96996	1.01197	0.994117	1.0246	1.02122	1.001	0.981179	0.986985	1	0.940259	0.997104	1.0203	0.972486	0.973167	0.971416
424	chr2	9945761	10475708	1.03004	1.24147	1.0141	1.02644	0.980591	1.03138	1.0008	1.04865	1.04896	0.997503	0.980395	1.0026	0.998901	0.998102	1.02041	1.0203	1.02583	1.02665	0.990446	1.01613	1.01035	1.13974	1.00371	0.979611	1.02	1.02757	0.970154	1.02337	0.972486	1.05781	1.0319	0.96996	1.01197	0.994117	1.0246	1.02122	1.001	0.981179	0.986985	1	0.940259	0.997104	1.0203	0.972486	0.973167	0.971416
425	chr2	10475709	11003433	1.03004	1.24147	1.0141	1.02644	0.980591	1.03138	1.0008	1.04865	1.04896	0.997503	0.980395	1.0026	0.998901	0.998102	1.02041	1.0203	1.02583	1.02665	0.990446	1.01613	1.01035	1.13974	1.00371	0.979611	1.02	1.02757	0.970154	1.02337	0.972486	1.05781	1.0319	0.96996	1.01197	0.994117	1.0246	1.02122	1.001	0.981179	0.986985	1	0.940259	0.997104	1.0203	0.972486	0.973167	0.971416
426	chr2	11003434	11557325	1.03004	1.24147	1.0141	1.02644	0.980591	1.03138	1.0008	1.04865	1.04896	0.997503	0.980395	1.0026	0.998901	0.998102	1.02041	1.0203	1.02583	1.02665	0.990446	1.01613	1.01035	1.13974	1.00371	0.979611	1.02	1.02757	0.970154	1.02337	0.972486	1.05781	1.0319	0.96996	1.01197	0.994117	1.0246	1.02122	1.001	0.981179	0.986985	1	0.940259	0.997104	1.0203	0.972486	0.973167	0.971416
427	chr2	11557326	12103599	1.03004	1.24147	1.0141	1.02644	0.980591	1.03138	1.0008	1.04865	1.04896	0.997503	0.980395	1.0026	0.998901	0.998102	1.02041	1.0203	1.02583	1.02665	0.990446	1.01613	1.01035	1.13974	1.00371	0.979611	1.02	1.02757	0.970154	1.02337	0.972486	1.05781	1.0319	0.96996	1.01197	0.994117	1.0246	1.02122	1.001	0.981179	0.986985	1	0.940259	0.997104	1.0203	0.972486	0.973167	0.971416
428	chr2	12103600	12658986	1.03004	1.24147	1.0141	1.02644	0.980591	1.03138	1.0008	1.04865	1.04896	0.997503	0.980395	1.0026	0.998901	0.998102	1.02041	1.0203	1.02583	1.02665	0.990446	1.01613	1.01035	1.13974	1.00371	0.979611	1.02	1.02757	0.970154	1.02337	0.972486	1.05781	1.0319	0.96996	1.01197	0.994117	1.0246	1.02122	1.001	0.981179	0.986985	1	0.940259	0.997104	1.0203	0.972486	0.973167	0.971416
429	chr2	12658987	13221735	1.03004	1.24147	1.0141	1.02644	0.980591	1.03138	1.0008	1.04865	1.04896	0.997503	0.980395	1.0026	0.998901	0.998102	1.02041	1.0203	1.02583	1.02665	0.990446	1.01613	1.01035	1.13974	1.00371	0.979611	1.02	1.02757	0.970154	1.02337	0.972486	1.05781	1.0319	0.96996	1.01197	0.994117	1.0246	1.02122	1.001	0.981179	0.986985	1	0.940259	0.997104	1.0203	0.972486	0.973167	0.971416
430	chr2	13221736	13883879	1.03004	1.24147	1.0141	1.02644	0.980591	1.03138	1.0008	1.04865	1.04896	0.997503	0.980395	1.0026	0.998901	0.998102	1.02041	1.0203	1.02583	1.02665	0.990446	1.01613	1.01035	1.13974	1.00371	0.979611	1.02	1.02757	0.970154	1.02337	0.972486	1.05781	1.0319	0.96996	1.01197	0.994117	1.0246	1.02122	1.001	0.981179	0.986985	1	0.940259	0.997104	1.0203	0.972486	0.973167	0.971416
431	chr2	13883880	14533355	1.03004	1.24147	1.0141	1.02644	0.980591	1.03138	1.0008	1.04865	1.04896	0.997503	0.980395	1.0026	0.998901	0.998102	1.02041	1.0203	1.02583	1.02665	0.990446	1.01613	1.01035	1.13974	1.00371	0.979611	1.02	1.02757	0.970154	1.02337	0.972486	1.05781	1.0319	0.96996	1.01197	0.994117	1.0246	1.02122	1.001	0.981179	0.986985	1	0.940259	0.997104	1.0203	0.972486	0.973167	0.971416
432	chr2	14533356	15114507	1.03004	1.24147	1.0141	1.02644	0.980591	1.03138	1.0008	1.04865	1.04896	0.997503	0.980395	1.0026	0.998901	0.998102	1.02041	1.0203	1.02583	1.02665	0.990446	1.01613	1.01035	1.13974	1.00371	0.979611	1.02	1.02757	0.970154	1.02337	0.972486	1.05781	1.0319	0.96996	1.01197	0.994117	1.0246	1.02122	1.001	0.981179	0.986985	1	0.940259	0.997104	1.0203	0.972486	0.973167	0.971416
433	chr2	15114508	15718462	1.03004	1.24147	1.0141	1.02644	0.980591	1.03138	1.0008	1.04865	1.04896	0.997503	0.980395	1.0026	0.998901	0.998102	1.02041	1.0203	1.02583	1.02665	0.990446	1.01613	1.01035	1.13974	1.00371	0.979611	1.02	1.02757	0.970154	1.02337	0.972486	1.05781	1.0319	0.96996	1.01197	0.994117	1.0246	1.02122	1.001	0.981179	0.986985	1	0.940259	0.997104	1.0203	0.972486	0.973167	0.971416
434	chr2	15718463	16266132	1.03004	1.24147	1.0141	1.02644	0.980591	1.03138	1.0008	1.04865	1.04896	0.997503	0.980395	1.0026	0.998901	0.998102	1.02041	1.0203	1.02583	1.02665	0.990446	1.01613	1.01035	1.13974	1.00371	0.979611	1.02	1.02757	0.970154	1.02337	0.972486	1.05781	1.0319	0.96996	1.01197	0.994117	1.0246	1.02122	1.001	1.10263	0.986985	1	0.940259	0.997104	1.0203	0.972486	0.973167	0.971416
435	chr2	16266133	16886870	1.03004	1.24147	1.0141	1.02644	0.980591	1.03138	1.0008	1.04865	1.04896	0.997503	0.980395	1.0026	0.998901	0.998102	1.02041	1.0203	1.02583	1.02665	0.990446	1.01613	1.01035	1.13974	1.00371	0.979611	1.02	1.02757	0.970154	1.02337	0.972486	1.05781	1.0319	0.96996	1.01197	0.994117	1.0246	1.02122	1.001	1.10263	0.986985	1	0.940259	0.997104	1.0203	0.972486	0.973167	0.971416
436	chr2	16886871	17478741	1.03004	1.24147	1.0141	1.02644	0.980591	1.03138	1.0008	1.04865	1.04896	0.997503	0.980395	1.0026	0.998901	0.998102	1.02041	1.0203	1.02583	1.02665	0.990446	1.01613	1.01035	1.13974	1.00371	0.979611	1.02	1.02757	0.970154	1.02337	0.972486	1.05781	1.0319	0.96996	1.01197	0.994117	1.0246	1.02122	1.001	1.10263	0.986985	1	0.940259	0.997104	1.0203	0.972486	0.973167	0.971416
437	chr2	17478742	18071058	1.03004	1.24147	1.0141	1.02644	0.980591	1.03138	1.0008	1.04865	1.04896	0.997503	0.980395	1.0026	0.998901	0.998102	1.02041	1.0203	1.02583	1.02665	0.990446	1.01613	1.01035	1.13974	1.00371	0.979611	1.02	1.02757	0.970154	1.02337	0.972486	1.05781	1.0319	0.96996	1.01197	0.994117	1.0246	1.02122	1.001	1.10263	0.986985	1	0.940259	0.997104	1.0203	0.972486	0.973167	0.971416
438	chr2	18071059	18637274	1.03004	1.24147	1.0141	1.02644	0.980591	1.03138	1.0008	1.04865	1.04896	0.997503	0.980395	1.0026	0.998901	0.998102	1.02041	1.0203	1.02583	1.02665	0.990446	1.01613	1.01035	1.13974	1.00371	0.979611	1.02	1.02757	0.970154	1.02337	0.972486	1.05781	1.0319	0.96996	1.01197	0.994117	1.0246	1.02122	1.001	1.10263	0.986985	1	0.940259	0.997104	1.0203	0.972486	0.973167	0.971416
439	chr2	18637275	19207449	1.03004	1.24147	1.0141	1.02644	0.980591	1.03138	1.0008	1.04865	1.04896	0.997503	0.980395	1.0026	0.998901	0.998102	1.02041	1.0203	1.02583	1.02665	0.990446	1.01613	1.01035	1.13974	1.00371	0.979611	1.02	1.02757	0.970154	1.02337	0.972486	1.05781	1.0319	0.96996	1.01197	0.994117	1.0246	1.02122	1.001	1.10263	0.986985	1	0.940259	0.997104	1.0203	0.972486	0.973167	0.971416
440	chr2	19207450	19763965	1.03004	1.24147	1.0141	1.02644	0.980591	1.03138	1.0008	1.04865	1.04896	0.997503	0.980395	1.0026	0.998901	0.998102	1.02041	1.0203	1.02583	1.02665	0.990446	1.01613	1.01035	1.13974	1.00371	0.979611	1.02	1.02757	0.970154	1.02337	0.972486	1.05781	1.0319	0.96996	1.01197	0.994117	1.0246	1.02122	1.001	1.10263	0.986985	1	0.940259	0.997104	1.0203	0.972486	0.973167	0.971416
441	chr2	19763966	20303189	1.03004	1.24147	1.0141	1.02644	0.980591	1.03138	1.0008	1.04865	1.04896	0.997503	0.980395	1.0026	0.998901	0.998102	1.02041	1.0203	1.02583	1.02665	0.990446	1.01613	1.01035	1.13974	1.00371	0.979611	1.02	1.02757	0.970154	1.02337	0.972486	1.05781	1.0319	0.96996	1.01197	0.994117	1.0246	1.02122	1.001	1.10263	0.986985	1	0.940259	0.997104	1.0203	0.972486	0.973167	0.971416
442	chr2	20303190	20818382	1.03004	1.24147	1.0141	1.02644	0.980591	1.03138	1.0008	1.04865	1.04896	0.997503	0.980395	1.0026	0.998901	0.998102	1.02041	1.0203	1.02583	1.02665	0.990446	1.01613	1.01035	1.13974	1.00371	0.979611	1.02	1.02757	0.970154	1.02337	0.972486	1.05781	1.0319	0.96996	1.01197	0.994117	1.0246	1.02122	1.001	1.10263	0.986985	1	0.940259	0.997104	1.0203	0.972486	0.973167	0.971416
443	chr2	20818383	21397363	1.03004	1.24147	1.0141	1.02644	0.980591	1.03138	1.0008	1.04865	1.04896	0.997503	0.980395	1.0026	0.998901	0.998102	1.02041	1.0203	1.02583	1.02665	0.990446	1.01613	1.01035	1.13974	1.00371	0.979611	1.02	1.02757	0.970154	1.02337	0.972486	1.05781	1.0319	0.96996	1.01197	0.994117	1.0246	1.02122	1.001	1.10263	0.986985	1	0.940259	0.997104	1.0203	0.972486	0.973167	0.971416
444	chr2	21397364	21992730	1.03004	1.24147	1.0141	1.02644	0.980591	1.03138	1.0008	1.04865	1.04896	0.997503	0.980395	1.0026	0.998901	0.998102	1.02041	1.0203	1.02583	1.02665	0.990446	1.01613	1.01035	1.13974	1.00371	0.979611	1.02	1.02757	0.970154	1.02337	0.972486	1.05781	1.0319	0.96996	1.01197	0.994117	1.0246	1.02122	1.001	1.10263	0.986985	1	0.940259	0.997104	1.0203	0.972486	0.973167	0.971416
445	chr2	21992731	22606020	1.03004	1.24147	1.0141	1.02644	0.980591	1.03138	1.0008	1.04865	1.04896	0.997503	0.980395	1.0026	0.998901	0.998102	1.02041	1.0203	1.02583	1.02665	0.990446	1.01613	1.01035	1.13974	1.00371	0.979611	1.02	1.02757	0.970154	1.02337	0.972486	1.05781	1.0319	0.96996	1.01197	0.994117	1.0246	1.02122	1.001	1.10263	0.986985	1	0.940259	0.997104	1.0203	0.972486	0.973167	0.971416
446	chr2	22606021	23204886	1.03004	1.24147	1.0141	1.02644	0.980591	1.03138	1.0008	1.04865	1.04896	0.997503	0.980395	1.0026	0.998901	0.998102	1.02041	1.0203	1.02583	1.02665	0.990446	1.01613	1.01035	1.13974	1.00371	0.979611	1.02	1.02757	0.970154	1.02337	0.972486	1.05781	1.0319	0.96996	1.01197	0.994117	1.0246	1.02122	1.001	1.10263	0.986985	1	0.940259	0.997104	1.0203	0.972486	0.973167	0.971416
447	chr2	23204887	23739795	1.03004	1.24147	1.0141	1.02644	0.980591	1.03138	1.0008	1.04865	1.04896	0.997503	0.980395	1.0026	0.998901	0.998102	1.02041	1.0203	1.02583	1.02665	0.990446	1.01613	1.01035	1.13974	1.00371	0.979611	1.02	1.02757	0.970154	1.02337	0.972486	1.05781	1.0319	0.96996	1.01197	0.994117	1.0246	1.02122	1.001	1.10263	0.986985	1	0.940259	0.997104	1.0203	0.972486	0.973167	0.971416
448	chr2	23739796	24307720	1.03004	1.24147	1.0141	1.02644	0.980591	1.03138	1.0008	1.04865	1.04896	0.997503	0.980395	1.0026	0.998901	0.998102	1.02041	1.0203	1.02583	1.02665	0.990446	1.01613	1.01035	1.13974	1.00371	0.979611	1.02	1.02757	0.970154	1.02337	0.972486	1.05781	1.0319	0.96996	1.01197	0.994117	1.0246	1.02122	1.001	1.10263	0.986985	1	0.940259	0.997104	1.0203	0.972486	0.973167	0.971416
449	chr2	24307721	24887019	1.03004	1.24147	1.0141	1.02644	0.980591	1.03138	1.0008	1.04865	1.04896	0.997503	0.980395	1.0026	0.998901	0.998102	1.02041	1.0203	1.02583	1.02665	0.990446	1.01613	1.01035	1.13974	1.00371	0.979611	1.02	1.02757	0.970154	1.02337	0.972486	1.05781	1.0319	0.96996	1.01197	0.994117	1.0246	1.02122	1.001	1.10263	0.986985	1	0.940259	0.997104	1.0203	0.972486	0.973167	0.971416
450	chr2	24887020	25449427	1.03004	1.24147	1.0141	1.02644	0.980591	1.03138	1.0008	1.04865	1.04896	0.997503	0.980395	1.0026	0.998901	0.998102	1.02041	1.0203	1.02583	1.02665	0.990446	1.01613	1.01035	1.13974	1.00371	0.979611	1.02	1.02757	0.970154	1.02337	0.972486	1.05781	1.0319	0.96996	1.01197	0.994117	1.0246	1.02122	1.001	1.10263	0.986985	1	0.940259	0.997104	1.0203	0.972486	0.973167	0.971416
451	chr2	25449428	26000393	1.03004	1.24147	1.0141	1.02644	0.980591	1.03138	1.0008	1.04865	1.04896	0.997503	0.980395	1.0026	0.998901	0.998102	1.02041	1.0203	1.02583	1.02665	0.990446	1.01613	1.01035	1.13974	1.00371	0.979611	1.02	1.02757	0.970154	1.02337	0.972486	1.05781	1.0319	0.96996	1.01197	0.994117	1.0246	1.02122	1.001	1.10263	0.986985	1	0.940259	0.997104	1.0203	0.972486	0.973167	0.971416
452	chr2	26000394	26577169	1.03004	1.24147	1.0141	1.02644	0.980591	1.03138	1.0008	1.04865	1.04896	0.997503	0.980395	1.0026	0.998901	0.998102	1.02041	1.0203	1.02583	1.02665	0.990446	1.01613	1.01035	1.13974	1.00371	0.979611	1.02	1.02757	0.970154	1.02337	0.972486	1.05781	1.0319	0.96996	1.01197	0.994117	1.0246	1.02122	1.001	1.10263	0.986985	1	0.940259	0.997104	1.0203	0.972486	0.973167	0.971416
453	chr2	26577170	27100948	1.03004	1.24147	1.0141	1.02644	0.980591	1.03138	1.0008	1.04865	1.04896	0.997503	0.980395	1.0026	0.998901	0.998102	1.02041	1.0203	1.02583	1.02665	0.990446	1.01613	1.01035	1.13974	1.00371	0.979611	1.02	1.02757	0.970154	1.02337	0.972486	1.05781	1.0319	0.96996	1.01197	0.994117	1.0246	1.02122	1.001	1.10263	0.986985	1	0.940259	0.997104	1.0203	0.972486	0.973167	0.971416
454	chr2	27100949	27663459	1.03004	1.24147	1.0141	1.02644	0.980591	1.03138	1.0008	1.04865	1.04896	0.997503	0.980395	1.0026	0.998901	0.998102	1.02041	1.0203	1.02583	1.02665	0.990446	1.01613	1.01035	1.13974	1.00371	0.979611	1.02	1.02757	0.970154	1.02337	0.972486	1.05781	1.0319	0.96996	1.01197	0.994117	1.0246	1.02122	1.001	1.10263	0.986985	1	0.940259	0.997104	1.0203	0.972486	0.973167	0.971416
455	chr2	27663460	28239818	1.03004	1.24147	1.0141	1.02644	0.980591	1.03138	1.0008	1.04865	1.04896	0.997503	0.980395	1.0026	0.998901	0.998102	1.02041	1.0203	1.02583	1.02665	0.990446	1.01613	1.01035	1.13974	1.00371	0.979611	1.02	1.02757	0.970154	1.02337	0.972486	1.05781	1.0319	0.96996	1.01197	0.994117	1.0246	1.02122	1.001	1.10263	0.986985	1	0.940259	0.997104	1.0203	0.972486	0.973167	0.971416
456	chr2	28239819	28771162	1.03004	1.24147	1.0141	1.02644	0.980591	1.03138	1.0008	1.04865	1.04896	0.997503	0.980395	1.0026	0.998901	0.998102	1.02041	1.0203	1.02583	1.02665	0.990446	1.01613	1.01035	1.13974	1.00371	0.979611	1.02	1.02757	0.970154	1.02337	0.972486	1.05781	1.0319	0.96996	1.01197	0.994117	1.0246	1.02122	1.001	1.10263	0.986985	1	0.940259	0.997104	1.0203	0.972486	0.973167	0.971416
457	chr2	28771163	29307027	1.03004	1.24147	1.0141	1.02644	0.980591	1.03138	1.0008	1.04865	1.04896	0.997503	0.980395	1.0026	0.998901	0.998102	1.02041	1.0203	1.02583	1.02665	0.990446	1.01613	1.01035	1.13974	1.00371	0.979611	1.02	1.02757	0.970154	1.02337	0.972486	1.05781	1.0319	0.96996	1.01197	0.994117	1.0246	1.02122	1.001	1.10263	0.986985	1	0.940259	0.997104	1.0203	0.972486	0.973167	0.971416
458	chr2	29307028	29816036	1.03004	1.24147	1.0141	1.02644	0.980591	1.03138	1.0008	1.04865	1.04896	0.997503	0.980395	1.0026	0.998901	0.998102	1.02041	1.0203	1.02583	1.02665	0.990446	1.01613	1.01035	1.13974	1.00371	0.979611	1.02	1.02757	0.970154	1.02337	0.972486	1.05781	1.0319	0.96996	1.01197	0.994117	1.0246	1.02122	1.001	1.10263	0.986985	1	0.940259	0.997104	1.0203	0.972486	0.973167	0.971416
459	chr2	29816037	30341973	1.03004	1.24147	1.0141	1.02644	0.980591	1.03138	1.0008	1.04865	1.04896	0.997503	0.980395	1.0026	0.998901	0.998102	1.02041	1.0203	1.02583	1.02665	0.990446	1.01613	1.01035	1.13974	1.00371	0.979611	1.02	1.02757	0.970154	1.02337	0.972486	1.05781	1.0319	0.96996	1.01197	0.994117	1.0246	1.02122	1.001	1.10263	0.986985	1	0.940259	0.997104	1.0203	0.972486	0.973167	0.971416
460	chr2	30341974	30864415	1.03004	1.24147	1.0141	1.02644	0.980591	1.03138	1.0008	1.04865	1.04896	0.997503	0.980395	1.0026	0.998901	0.998102	1.02041	1.0203	1.02583	1.02665	0.990446	1.01613	1.01035	1.13974	1.00371	0.979611	1.02	1.02757	0.970154	1.02337	0.972486	1.05781	1.0319	0.96996	1.01197	0.994117	1.0246	1.02122	1.001	1.10263	0.986985	1	0.940259	0.997104	1.0203	0.972486	0.973167	0.971416
461	chr2	30864416	31383531	1.03004	1.24147	1.0141	1.02644	0.980591	1.03138	1.0008	1.04865	1.04896	0.997503	0.980395	1.0026	0.998901	0.998102	1.02041	1.0203	1.02583	1.02665	0.990446	1.01613	1.01035	1.13974	1.00371	0.979611	1.02	1.02757	0.970154	1.02337	0.972486	1.05781	1.0319	0.96996	1.01197	0.994117	1.0246	1.02122	1.001	1.10263	0.986985	1	0.940259	0.997104	1.0203	0.972486	0.973167	0.971416
462	chr2	31383532	31935767	1.03004	1.24147	1.0141	1.02644	0.980591	1.03138	1.0008	1.04865	1.04896	0.997503	0.980395	1.0026	0.998901	0.998102	1.02041	1.0203	1.02583	1.02665	0.990446	1.01613	1.01035	1.13974	1.00371	0.979611	1.02	1.02757	0.970154	1.02337	0.972486	1.05781	1.0319	0.96996	1.01197	0.994117	1.0246	1.02122	1.001	1.10263	0.986985	1	0.940259	0.997104	1.0203	0.972486	0.973167	0.971416
463	chr2	31935768	32597270	1.03004	1.24147	1.0141	1.02644	0.980591	1.03138	1.0008	1.04865	1.04896	0.997503	0.980395	1.0026	0.998901	0.998102	1.02041	1.0203	1.02583	1.02665	0.990446	1.01613	1.01035	1.13974	1.00371	0.979611	1.02	1.02757	0.970154	1.02337	0.972486	1.05781	1.0319	0.96996	1.01197	0.994117	1.0246	1.02122	1.001	1.10263	0.986985	1	0.940259	0.997104	1.0203	0.972486	0.973167	0.971416
464	chr2	32597271	33198565	1.03004	1.24147	1.0141	1.02644	0.980591	1.03138	1.0008	1.04865	1.04896	0.997503	0.980395	1.0026	0.998901	0.998102	1.02041	1.0203	1.02583	1.02665	0.990446	1.01613	1.01035	1.13974	1.00371	0.979611	1.02	1.02757	0.970154	1.02337	0.972486	1.05781	1.0319	0.96996	1.01197	0.994117	1.0246	1.02122	1.001	1.10263	0.986985	1	0.940259	0.997104	1.0203	0.972486	0.973167	0.971416
465	chr2	33198566	33738047	1.03004	1.24147	1.0141	1.02644	0.980591	1.03138	1.0008	1.04865	1.04896	0.997503	0.980395	1.0026	0.998901	0.998102	1.02041	1.0203	1.02583	1.02665	0.990446	1.01613	1.01035	1.13974	1.00371	0.979611	1.02	1.02757	0.970154	1.02337	0.972486	1.05781	1.0319	0.96996	1.01197	0.994117	1.0246	1.02122	1.001	1.10263	0.986985	1	0.940259	0.997104	1.0203	0.972486	0.973167	0.971416
466	chr2	33738048	34329598	1.03004	1.24147	1.0141	1.02644	0.980591	1.03138	1.0008	1.04865	1.04896	0.997503	0.980395	1.0026	0.998901	0.998102	1.02041	1.0203	1.02583	1.02665	0.990446	1.01613	1.01035	1.13974	1.00371	0.979611	1.02	1.02757	0.970154	1.02337	0.972486	1.05781	1.0319	0.96996	1.01197	0.994117	1.0246	1.02122	1.001	1.10263	0.986985	1	0.940259	0.997104	1.0203	0.972486	0.973167	0.971416
467	chr2	34329599	34969115	1.03004	1.24147	1.0141	1.02644	0.980591	1.03138	1.0008	1.04865	1.04896	0.997503	0.980395	1.0026	0.998901	0.998102	1.02041	1.0203	1.02583	1.02665	0.990446	1.01613	1.01035	1.13974	1.00371	0.979611	1.02	1.02757	0.970154	1.02337	0.972486	1.05781	1.0319	0.96996	1.01197	0.994117	1.0246	1.02122	1.001	1.10263	0.986985	1	0.940259	0.997104	1.0203	0.972486	0.973167	0.971416
468	chr2	34969116	35642877	1.03004	1.24147	1.0141	1.02644	0.980591	1.03138	1.0008	1.04865	1.04896	0.997503	0.980395	1.0026	0.998901	0.998102	1.02041	1.0203	1.02583	1.02665	0.990446	1.01613	1.01035	1.13974	1.00371	0.979611	1.02	1.02757	0.970154	1.02337	0.972486	1.05781	1.0319	0.96996	1.01197	0.994117	1.0246	1.02122	1.001	1.10263	0.986985	1	0.940259	0.997104	1.0203	0.972486	0.973167	0.971416
469	chr2	35642878	36301261	1.03004	1.24147	1.0141	1.02644	0.980591	1.03138	1.0008	1.04865	1.04896	0.997503	0.980395	1.0026	0.998901	0.998102	1.02041	1.0203	1.02583	1.02665	0.990446	1.01613	1.01035	1.13974	1.00371	0.979611	1.02	1.02757	0.970154	1.02337	0.972486	1.05781	1.0319	0.96996	1.01197	0.994117	1.0246	1.02122	1.001	1.10263	0.986985	1	0.940259	0.997104	1.0203	0.972486	0.973167	0.971416
470	chr2	36301262	36879041	1.03004	1.24147	1.0141	1.02644	0.980591	1.03138	1.0008	1.04865	1.04896	0.997503	0.980395	1.0026	0.998901	0.998102	1.02041	1.0203	1.02583	1.02665	0.990446	1.01613	1.01035	1.13974	1.00371	0.979611	1.02	1.02757	0.970154	1.02337	0.972486	1.05781	1.0319	0.96996	1.01197	0.994117	1.0246	1.02122	1.001	1.10263	0.986985	1	0.940259	0.997104	1.0203	0.972486	0.973167	0.971416
471	chr2	36879042	37431136	1.03004	1.24147	1.0141	1.02644	0.980591	1.03138	1.0008	1.04865	1.04896	0.997503	0.980395	1.0026	0.998901	0.998102	1.02041	1.0203	1.02583	1.02665	0.990446	1.01613	1.01035	1.13974	1.00371	0.979611	1.02	1.02757	0.970154	1.02337	0.972486	1.05781	1.0319	0.96996	1.01197	0.994117	1.0246	1.02122	1.001	1.10263	0.986985	1	0.940259	0.997104	1.0203	0.972486	0.973167	0.971416
472	chr2	37431137	37979780	1.03004	1.24147	1.0141	1.02644	0.980591	1.03138	1.0008	1.04865	1.04896	0.997503	0.980395	1.0026	0.998901	0.998102	1.02041	1.0203	1.02583	1.02665	0.990446	1.01613	1.01035	1.13974	1.00371	0.979611	1.02	1.02757	0.970154	1.02337	0.972486	1.05781	1.0319	0.96996	1.01197	0.994117	1.0246	1.02122	1.001	1.10263	0.986985	1	0.940259	0.997104	1.0203	0.972486	0.973167	0.971416
473	chr2	37979781	38517812	1.03004	1.24147	1.0141	1.02644	0.980591	1.03138	1.0008	1.04865	1.04896	0.997503	0.980395	1.0026	0.998901	0.998102	1.02041	1.0203	1.02583	1.02665	0.990446	1.01613	1.01035	1.13974	1.00371	0.979611	1.02	1.02757	0.970154	1.02337	0.972486	1.05781	1.0319	0.96996	1.01197	0.994117	1.0246	1.02122	1.001	1.10263	0.986985	1	0.940259	0.997104	1.0203	0.972486	0.973167	0.971416
474	chr2	38517813	39087244	1.03004	1.24147	1.0141	1.02644	0.980591	1.03138	1.0008	1.04865	1.04896	0.997503	0.980395	1.0026	0.998901	0.998102	1.02041	1.0203	1.02583	1.02665	0.990446	1.01613	1.01035	1.13974	1.00371	0.979611	1.02	1.02757	0.970154	1.02337	0.972486	1.05781	1.0319	0.96996	1.01197	0.994117	1.0246	1.02122	1.001	1.10263	0.986985	1	0.940259	0.997104	1.0203	0.972486	0.973167	0.971416
475	chr2	39087245	39678823	1.03004	1.24147	1.0141	1.02644	0.980591	1.03138	1.0008	1.04865	1.04896	0.997503	0.980395	1.0026	0.998901	0.998102	1.02041	1.0203	1.02583	1.02665	0.990446	1.01613	1.01035	1.13974	1.00371	0.979611	1.02	1.02757	0.970154	1.02337	0.972486	1.05781	1.0319	0.96996	1.01197	0.994117	1.0246	1.02122	1.001	1.10263	0.986985	1	0.940259	0.997104	1.0203	0.972486	0.973167	0.971416
476	chr2	39678824	40223561	1.03004	1.24147	1.0141	1.02644	0.980591	1.03138	1.0008	1.04865	1.04896	0.997503	0.980395	1.0026	0.998901	0.998102	1.02041	1.0203	1.02583	1.02665	0.990446	1.01613	1.01035	1.13974	1.00371	0.979611	1.02	1.02757	0.970154	1.02337	0.972486	1.05781	1.0319	0.96996	1.01197	0.994117	1.0246	1.02122	1.001	1.10263	0.986985	1	0.940259	0.997104	1.0203	0.972486	0.973167	0.971416
477	chr2	40223562	40783523	1.03004	1.24147	1.0141	1.02644	0.980591	1.03138	1.0008	1.04865	1.04896	0.997503	0.980395	1.0026	0.998901	0.998102	1.02041	1.0203	1.02583	1.02665	0.990446	1.01613	1.01035	1.13974	1.00371	0.979611	1.02	1.02757	0.970154	1.02337	0.972486	1.05781	1.0319	0.96996	1.01197	0.994117	1.0246	1.02122	1.001	1.10263	0.986985	1	0.940259	0.997104	1.0203	0.972486	0.973167	0.971416
478	chr2	40783524	41400376	1.03004	1.24147	1.0141	1.02644	0.980591	1.03138	1.0008	1.04865	1.04896	0.997503	0.980395	1.0026	0.998901	0.998102	1.02041	1.0203	1.02583	1.02665	0.990446	1.01613	1.01035	1.13974	1.00371	0.979611	1.02	1.02757	0.970154	1.02337	0.972486	1.05781	1.0319	0.96996	1.01197	0.994117	1.0246	1.02122	1.001	1.10263	0.986985	1	0.940259	0.997104	1.0203	0.972486	0.973167	0.971416
479	chr2	41400377	42006964	1.03004	1.24147	1.0141	1.02644	0.980591	1.03138	1.0008	1.04865	1.04896	0.997503	0.980395	1.0026	0.998901	0.998102	1.02041	1.0203	1.02583	1.02665	0.990446	1.01613	1.01035	1.13974	1.00371	0.979611	1.02	1.02757	0.970154	1.02337	0.972486	1.05781	1.0319	0.96996	1.01197	0.994117	1.0246	1.02122	1.001	1.10263	0.986985	1	0.940259	0.997104	1.0203	0.972486	0.973167	0.971416
480	chr2	42006965	42563140	1.03004	1.24147	1.0141	1.02644	0.980591	1.03138	1.0008	1.04865	1.04896	0.997503	0.980395	1.0026	0.998901	0.998102	1.02041	1.0203	1.02583	1.02665	0.990446	1.01613	1.01035	1.13974	1.00371	0.979611	1.02	1.02757	0.970154	1.02337	0.972486	1.05781	1.0319	0.96996	1.01197	0.994117	1.0246	1.02122	1.001	1.10263	0.986985	1	0.940259	0.997104	1.0203	0.972486	0.973167	0.971416
481	chr2	42563141	43142304	1.03004	1.24147	1.0141	1.02644	0.980591	1.03138	1.0008	1.04865	1.04896	0.997503	0.980395	1.0026	0.998901	0.998102	1.02041	1.0203	1.02583	1.02665	0.990446	1.01613	1.01035	1.13974	1.00371	0.979611	1.02	1.02757	0.970154	1.02337	0.972486	1.05781	1.0319	0.96996	1.01197	0.994117	1.0246	1.02122	1.001	1.10263	0.986985	1	0.940259	0.997104	1.0203	0.972486	0.973167	0.971416
482	chr2	43142305	43662661	1.03004	1.24147	1.0141	1.02644	0.980591	1.03138	1.0008	1.04865	1.04896	0.997503	0.980395	1.0026	0.998901	0.998102	1.02041	1.0203	1.02583	1.02665	0.990446	1.01613	1.01035	1.13974	1.00371	0.979611	1.02	1.02757	0.970154	1.02337	0.972486	1.05781	1.0319	0.96996	1.01197	0.994117	1.0246	1.02122	1.001	1.10263	0.986985	1	0.940259	0.997104	1.0203	0.972486	0.973167	0.971416
483	chr2	43662662	44246905	1.03004	1.24147	1.0141	1.02644	0.980591	1.03138	1.0008	1.04865	1.04896	0.997503	0.980395	1.0026	0.998901	0.998102	1.02041	1.0203	1.02583	1.02665	0.990446	1.01613	1.01035	1.13974	1.00371	0.979611	1.02	1.02757	0.970154	1.02337	0.972486	1.05781	1.0319	0.96996	1.01197	0.994117	1.0246	1.02122	1.001	1.10263	0.986985	1	0.940259	0.997104	1.0203	0.972486	0.973167	0.971416
484	chr2	44246906	44840512	1.03004	1.24147	1.0141	1.02644	0.980591	1.03138	1.0008	1.04865	1.04896	0.997503	0.980395	1.0026	0.998901	0.998102	1.02041	1.0203	1.02583	1.02665	0.990446	1.01613	1.01035	1.13974	1.00371	0.979611	1.02	1.02757	0.970154	1.02337	0.972486	1.05781	1.0319	0.96996	1.01197	0.994117	1.0246	1.02122	1.001	1.10263	0.986985	1	0.940259	0.997104	1.0203	0.972486	0.973167	0.971416
485	chr2	44840513	45394967	1.03004	1.24147	1.0141	1.02644	0.980591	1.03138	1.0008	1.04865	1.04896	0.997503	0.980395	1.0026	0.998901	0.998102	1.02041	1.0203	1.02583	1.02665	0.990446	1.01613	1.01035	1.13974	1.00371	0.979611	1.02	1.02757	0.970154	1.02337	0.972486	1.05781	1.0319	0.96996	1.01197	0.994117	1.0246	1.02122	1.001	1.10263	0.986985	1	0.940259	0.997104	1.0203	0.972486	0.973167	0.971416
486	chr2	45394968	45955197	1.03004	1.24147	1.0141	1.02644	0.980591	1.03138	1.0008	1.04865	1.04896	0.997503	0.980395	1.0026	0.998901	0.998102	1.02041	1.0203	1.02583	1.02665	0.990446	1.01613	1.01035	1.13974	1.00371	0.979611	1.02	1.02757	0.970154	1.02337	0.972486	1.05781	1.0319	0.96996	1.01197	0.994117	1.0246	1.02122	1.001	1.10263	0.986985	1	0.940259	0.997104	1.0203	0.972486	0.973167	0.971416
487	chr2	45955198	46454667	1.03004	1.24147	1.0141	1.02644	0.980591	1.03138	1.0008	1.04865	1.04896	0.997503	0.980395	1.0026	0.998901	0.998102	1.02041	1.0203	1.02583	1.02665	0.990446	1.01613	1.01035	1.13974	1.00371	0.979611	1.02	1.02757	0.970154	1.02337	0.972486	1.05781	1.0319	0.96996	1.01197	0.994117	1.0246	1.02122	1.001	1.10263	0.986985	1	0.940259	0.997104	1.0203	0.972486	0.973167	0.971416
488	chr2	46454668	46973302	1.03004	1.24147	1.0141	1.02644	0.980591	1.03138	1.0008	1.04865	1.04896	0.997503	0.980395	1.0026	0.998901	0.998102	1.02041	1.0203	1.02583	1.02665	0.990446	1.01613	1.01035	1.13974	1.00371	0.979611	1.02	1.02757	0.970154	1.02337	0.972486	1.05781	1.0319	0.96996	1.01197	0.994117	1.0246	1.02122	1.001	1.10263	0.986985	1	0.940259	0.997104	1.0203	0.972486	0.973167	0.971416
489	chr2	46973303	47483487	1.03004	1.24147	1.0141	1.02644	0.980591	1.03138	1.0008	1.04865	1.04896	0.997503	0.980395	1.0026	0.998901	0.998102	1.02041	1.0203	1.02583	1.02665	0.990446	1.01613	1.01035	1.13974	1.00371	0.979611	1.02	1.02757	0.970154	1.02337	0.972486	1.05781	1.0319	0.96996	1.01197	0.994117	1.0246	1.02122	1.001	1.10263	0.986985	1	0.940259	0.997104	1.0203	0.972486	0.973167	0.971416
490	chr2	47483488	48046218	1.03004	1.24147	1.0141	1.02644	0.980591	1.03138	1.0008	1.04865	1.04896	0.997503	0.980395	1.0026	0.998901	0.998102	1.02041	1.0203	1.02583	1.02665	0.990446	1.01613	1.01035	1.13974	1.00371	0.979611	1.02	1.02757	0.970154	1.02337	0.972486	1.05781	1.0319	0.96996	1.01197	0.994117	1.0246	1.02122	1.001	1.10263	0.986985	1	0.940259	0.997104	1.0203	0.972486	0.973167	0.971416
491	chr2	48046219	48650808	1.03004	1.24147	1.0141	1.02644	0.980591	1.03138	1.0008	1.04865	1.04896	0.997503	0.980395	1.0026	0.998901	0.998102	1.02041	1.0203	1.02583	1.02665	0.990446	1.01613	1.01035	1.13974	1.00371	0.979611	1.02	1.02757	0.970154	1.02337	0.972486	1.05781	1.0319	0.96996	1.01197	0.994117	1.0246	1.02122	1.001	1.10263	0.986985	1	0.940259	0.997104	1.0203	0.972486	0.973167	0.971416
492	chr2	48650809	49243614	1.03004	1.24147	1.0141	1.02644	0.980591	1.03138	1.0008	1.04865	1.04896	0.997503	0.980395	1.0026	0.998901	0.998102	1.02041	1.0203	1.02583	1.02665	0.990446	1.01613	1.01035	1.13974	1.00371	0.979611	1.02	1.02757	0.970154	1.02337	0.972486	1.05781	1.0319	0.96996	1.01197	0.994117	1.0246	1.02122	1.001	1.10263	0.986985	1	0.940259	0.997104	1.0203	0.972486	0.973167	0.971416
493	chr2	49243615	49876102	1.03004	1.24147	1.0141	1.02644	0.980591	1.03138	1.0008	1.04865	1.04896	0.997503	0.980395	1.0026	0.998901	0.998102	1.02041	1.0203	1.02583	1.02665	0.990446	1.01613	1.01035	1.13974	1.00371	0.979611	1.02	1.02757	0.970154	1.02337	0.972486	1.05781	1.0319	0.96996	1.01197	0.994117	1.0246	1.02122	1.001	1.10263	0.986985	1	0.940259	0.997104	1.0203	0.972486	0.973167	0.971416
494	chr2	49876103	50503028	1.03004	1.24147	1.0141	1.02644	0.980591	1.03138	1.0008	1.04865	1.04896	0.997503	0.980395	1.0026	0.998901	0.998102	1.02041	1.0203	1.02583	1.02665	0.990446	1.01613	1.01035	1.13974	1.00371	0.979611	1.02	1.02757	0.970154	1.02337	0.972486	1.05781	1.0319	0.96996	1.01197	0.994117	1.0246	1.02122	1.001	1.10263	0.986985	1	0.940259	0.997104	1.0203	0.972486	0.973167	0.971416
495	chr2	50503029	51097943	1.03004	1.24147	1.0141	1.02644	0.980591	1.03138	1.0008	1.04865	1.04896	0.997503	0.980395	1.0026	0.998901	0.998102	1.02041	1.0203	1.02583	1.02665	0.990446	1.01613	1.01035	1.13974	1.00371	0.979611	1.02	1.02757	0.970154	1.02337	0.972486	1.05781	1.0319	0.96996	1.01197	0.994117	1.0246	1.02122	1.001	1.10263	0.986985	1	0.940259	0.997104	1.0203	0.972486	0.973167	0.971416
496	chr2	51097944	51727810	1.03004	1.24147	1.0141	1.02644	0.980591	1.03138	1.0008	1.04865	1.04896	0.997503	0.980395	1.0026	0.998901	0.998102	1.02041	1.0203	1.02583	1.02665	0.990446	1.01613	1.01035	1.13974	1.00371	0.979611	1.02	1.02757	0.970154	1.02337	0.972486	1.05781	1.0319	0.96996	1.01197	0.994117	1.0246	1.02122	1.001	1.10263	0.986985	1	0.940259	0.997104	1.0203	0.972486	0.973167	0.971416
497	chr2	51727811	52410958	1.03004	1.24147	1.0141	1.02644	0.980591	1.03138	1.0008	1.04865	1.04896	0.997503	0.980395	1.0026	0.998901	0.998102	1.02041	1.0203	1.02583	1.02665	0.990446	1.01613	1.01035	1.13974	1.00371	0.979611	1.02	1.02757	0.970154	1.02337	0.972486	1.05781	1.0319	0.96996	1.01197	0.994117	1.0246	1.02122	1.001	1.10263	0.986985	1	0.940259	0.997104	1.0203	0.972486	0.973167	0.971416
498	chr2	52410959	53047196	1.03004	1.24147	1.0141	1.02644	0.980591	1.03138	1.0008	1.04865	1.04896	0.997503	0.980395	1.0026	0.998901	0.998102	1.02041	1.0203	1.02583	1.02665	0.990446	1.01613	1.01035	1.13974	1.00371	0.979611	1.02	1.02757	0.970154	1.02337	0.972486	1.05781	1.0319	0.96996	1.01197	0.994117	1.0246	1.02122	1.001	1.10263	0.986985	1	0.940259	0.997104	1.0203	0.972486	0.973167	0.971416
499	chr2	53047197	53670221	1.03004	1.24147	1.0141	1.02644	0.980591	1.03138	1.0008	1.04865	1.04896	0.997503	0.980395	1.0026	0.998901	0.998102	1.02041	1.0203	1.02583	1.02665	0.990446	1.01613	1.01035	1.13974	1.00371	0.979611	1.02	1.02757	0.970154	1.02337	0.972486	1.05781	1.0319	0.96996	1.01197	0.994117	1.0246	1.02122	1.001	1.10263	0.986985	1	0.940259	0.997104	1.0203	0.972486	0.973167	0.971416
500	chr2	53670222	54257737	1.03004	1.24147	1.0141	1.02644	0.980591	1.03138	1.0008	1.04865	1.04896	0.997503	0.980395	1.0026	0.998901	0.998102	1.02041	1.0203	1.02583	1.02665	0.990446	1.01613	1.01035	1.13974	1.00371	0.979611	1.02	1.02757	0.970154	1.02337	0.972486	1.05781	1.0319	0.96996	1.01197	0.994117	1.0246	1.02122	1.001	1.10263	0.986985	1	0.940259	0.997104	1.0203	0.972486	0.973167	0.971416
501	chr2	54257738	54820139	1.03004	1.24147	1.0141	1.02644	0.980591	1.03138	1.0008	1.04865	1.04896	0.997503	0.980395	1.0026	0.998901	0.998102	1.02041	1.0203	1.02583	1.02665	0.990446	1.01613	1.01035	1.13974	1.00371	0.979611	1.02	1.02757	0.970154	1.02337	0.972486	1.05781	1.0319	0.96996	1.01197	0.994117	1.0246	1.02122	1.001	1.10263	0.986985	1	0.940259	0.997104	1.0203	0.972486	0.973167	0.971416
502	chr2	54820140	55348994	1.03004	1.24147	1.0141	1.02644	0.980591	1.03138	1.0008	1.04865	1.04896	0.997503	0.980395	1.0026	0.998901	0.998102	1.02041	1.0203	1.02583	1.02665	0.990446	1.01613	1.01035	1.13974	1.00371	0.979611	1.02	1.02757	0.970154	1.02337	0.972486	1.05781	1.0319	0.96996	1.01197	0.994117	1.0246	1.02122	1.001	1.10263	0.986985	1	0.940259	0.997104	1.0203	0.972486	0.973167	0.971416
503	chr2	55348995	55949084	1.03004	1.24147	1.0141	1.02644	0.980591	1.03138	1.0008	1.04865	1.04896	0.997503	0.980395	1.0026	0.998901	0.998102	1.02041	1.0203	1.02583	1.02665	0.990446	1.01613	1.01035	1.13974	1.00371	0.979611	1.02	1.02757	0.970154	1.02337	0.972486	1.05781	1.0319	0.96996	1.01197	0.994117	1.0246	1.02122	1.001	1.10263	0.986985	1	0.940259	0.997104	1.0203	0.972486	0.973167	0.971416
504	chr2	55949085	56527410	1.03004	1.24147	1.0141	1.02644	0.980591	1.03138	1.0008	1.04865	1.04896	0.997503	0.980395	1.0026	0.998901	0.998102	1.02041	1.0203	1.02583	1.02665	0.990446	1.01613	1.01035	1.13974	1.00371	0.979611	1.02	1.02757	0.970154	1.02337	0.972486	1.05781	1.0319	0.96996	1.01197	0.994117	1.0246	1.02122	1.001	1.10263	0.986985	1	0.940259	0.997104	1.0203	0.972486	0.973167	0.971416
505	chr2	56527411	57144947	1.03004	1.24147	1.0141	1.02644	0.980591	1.03138	1.0008	1.04865	1.04896	0.997503	0.980395	1.0026	0.998901	0.998102	1.02041	1.0203	1.02583	1.02665	0.990446	1.01613	1.01035	1.13974	1.00371	0.979611	1.02	1.02757	0.970154	1.02337	0.972486	1.05781	1.0319	0.96996	1.01197	0.994117	1.0246	1.02122	1.001	1.10263	0.986985	1	0.940259	0.997104	1.0203	0.972486	0.973167	0.971416
506	chr2	57144948	57821570	1.03004	1.24147	1.0141	1.02644	0.980591	1.03138	1.0008	1.04865	1.04896	0.997503	0.980395	1.0026	0.998901	0.998102	1.02041	1.0203	1.02583	1.02665	0.990446	1.01613	1.01035	1.13974	1.00371	0.979611	1.02	1.02757	0.970154	1.02337	0.972486	1.05781	1.0319	0.96996	1.01197	0.994117	1.0246	1.02122	1.001	1.10263	0.986985	1	0.940259	0.997104	1.0203	0.972486	0.973167	0.971416
507	chr2	57821571	58467234	1.03004	1.24147	1.0141	1.02644	0.980591	1.03138	1.0008	1.04865	1.04896	0.997503	0.980395	1.0026	0.998901	0.998102	1.02041	1.0203	1.02583	1.02665	0.990446	1.01613	1.01035	1.13974	1.00371	0.979611	1.02	1.02757	0.970154	1.02337	0.972486	1.05781	1.0319	0.96996	1.01197	0.994117	1.0246	1.02122	1.001	1.10263	0.986985	1	0.940259	0.997104	1.0203	0.972486	0.973167	0.971416
508	chr2	58467235	59063278	1.03004	1.24147	1.0141	1.02644	0.980591	1.03138	1.0008	1.04865	1.04896	0.997503	0.980395	1.0026	0.998901	0.998102	1.02041	1.0203	1.02583	1.02665	0.990446	1.01613	1.01035	1.13974	1.00371	0.979611	1.02	1.02757	0.970154	1.02337	0.972486	1.05781	1.0319	0.96996	1.01197	0.994117	1.0246	1.02122	1.001	1.10263	0.986985	1	0.940259	0.997104	1.0203	0.972486	0.973167	0.971416
509	chr2	59063279	59627318	1.03004	1.24147	1.0141	1.02644	0.980591	1.03138	1.0008	1.04865	1.04896	0.997503	0.980395	1.0026	0.998901	0.998102	1.02041	1.0203	1.02583	1.02665	0.990446	1.01613	1.01035	1.13974	1.00371	0.979611	1.02	1.02757	0.970154	1.02337	0.972486	1.05781	1.0319	0.96996	1.01197	0.994117	1.0246	1.02122	1.001	1.10263	0.986985	1	0.940259	0.997104	1.0203	0.972486	0.973167	0.971416
510	chr2	59627319	60229212	1.03004	1.24147	1.0141	1.02644	0.980591	1.03138	1.0008	1.04865	1.04896	0.997503	0.980395	1.0026	0.998901	0.998102	1.02041	1.0203	1.02583	1.02665	0.990446	1.01613	1.01035	1.13974	1.00371	0.979611	1.02	1.02757	0.970154	1.02337	0.972486	1.05781	1.0319	0.96996	1.01197	0.994117	1.0246	1.02122	1.001	1.10263	0.986985	1	0.940259	0.997104	1.0203	0.972486	0.973167	0.971416
511	chr2	60229213	60766385	1.03004	1.24147	1.0141	1.02644	0.980591	1.03138	1.0008	1.04865	1.04896	0.997503	0.980395	1.0026	0.998901	0.998102	1.02041	1.0203	1.02583	1.02665	0.990446	1.01613	1.01035	1.13974	1.00371	0.979611	1.02	1.02757	0.970154	1.02337	0.972486	1.05781	1.0319	0.96996	1.01197	0.994117	1.0246	1.02122	1.001	1.10263	0.986985	1	0.940259	0.997104	1.0203	0.972486	0.973167	0.971416
512	chr2	60766386	61358979	1.03004	1.24147	1.0141	1.02644	0.980591	1.03138	1.0008	1.04865	1.04896	0.997503	0.980395	1.0026	0.998901	0.998102	1.02041	1.0203	1.02583	1.02665	0.990446	1.01613	1.01035	1.13974	1.00371	0.979611	1.02	1.02757	0.970154	1.02337	0.972486	1.05781	1.0319	0.96996	1.01197	0.994117	1.0246	1.02122	1.001	1.10263	0.986985	1	0.940259	0.997104	1.0203	0.972486	0.973167	0.971416
513	chr2	61358980	61947434	1.03004	1.24147	1.0141	1.02644	0.980591	1.03138	1.0008	1.04865	1.04896	0.997503	0.980395	1.0026	0.998901	0.998102	1.02041	1.0203	1.02583	1.02665	0.990446	1.01613	1.01035	1.13974	1.00371	0.979611	1.02	1.02757	0.970154	1.02337	0.972486	1.05781	1.0319	0.96996	1.01197	0.994117	1.0246	1.02122	1.001	1.10263	0.986985	1	0.940259	0.997104	1.0203	0.972486	0.973167	0.971416
514	chr2	61947435	62515784	1.03004	1.24147	1.0141	1.02644	0.980591	1.03138	1.0008	1.04865	1.04896	0.997503	0.980395	1.0026	0.998901	0.998102	1.02041	1.0203	1.02583	1.02665	0.990446	1.01613	1.01035	1.13974	1.00371	0.979611	1.02	1.02757	0.970154	1.02337	0.972486	1.05781	1.0319	0.96996	1.01197	0.994117	1.0246	1.02122	1.001	1.10263	0.986985	1	0.940259	0.997104	1.0203	0.972486	0.973167	0.971416
515	chr2	62515785	63091836	1.03004	1.24147	1.0141	1.02644	0.980591	1.03138	1.0008	1.04865	1.04896	0.997503	0.980395	1.0026	0.998901	0.998102	1.02041	1.0203	1.02583	1.02665	0.990446	1.01613	1.01035	1.13974	1.00371	0.979611	1.02	1.02757	0.970154	1.02337	0.972486	1.05781	1.0319	0.96996	1.01197	0.994117	1.0246	1.02122	1.001	1.10263	0.986985	1	0.940259	0.997104	1.0203	0.972486	0.973167	0.971416
516	chr2	63091837	63702132	1.03004	1.24147	1.0141	1.02644	0.980591	1.03138	1.0008	1.04865	1.04896	0.997503	0.980395	1.0026	0.998901	0.998102	1.02041	1.0203	1.02583	1.02665	0.990446	1.01613	1.01035	1.13974	1.00371	0.979611	1.02	1.02757	0.970154	1.02337	0.972486	1.05781	1.0319	0.96996	1.01197	0.994117	1.0246	1.02122	1.001	1.10263	0.986985	1	0.940259	0.997104	1.0203	0.972486	0.973167	0.971416
517	chr2	63702133	64314285	1.03004	1.24147	1.0141	1.02644	0.980591	1.03138	1.0008	1.04865	1.04896	0.997503	0.980395	1.0026	0.998901	0.998102	1.02041	1.0203	1.02583	1.02665	0.990446	1.01613	1.01035	1.13974	1.00371	0.979611	1.02	1.02757	0.970154	1.02337	0.972486	1.05781	1.0319	0.96996	1.01197	0.994117	1.0246	1.02122	1.001	1.10263	0.986985	1	0.940259	0.997104	1.0203	0.972486	0.973167	0.971416
518	chr2	64314286	64864049	1.03004	1.24147	1.0141	1.02644	0.980591	1.03138	1.0008	1.04865	1.04896	0.997503	0.980395	1.0026	0.998901	0.998102	1.02041	1.0203	1.02583	1.02665	0.990446	1.01613	1.01035	1.13974	1.00371	0.979611	1.02	1.02757	0.970154	1.02337	0.972486	1.05781	1.0319	0.96996	1.01197	0.994117	1.0246	1.02122	1.001	1.10263	0.986985	1	0.940259	0.997104	1.0203	0.972486	0.973167	0.971416
519	chr2	64864050	65392921	1.03004	1.24147	1.0141	1.02644	0.753294	1.03138	1.0008	1.04865	1.04896	0.997503	0.980395	1.0026	0.998901	0.998102	1.02041	1.0203	1.02583	1.02665	0.990446	1.01613	1.01035	1.13974	1.00371	0.979611	1.02	1.02757	0.970154	1.02337	0.972486	1.05781	1.0319	0.96996	1.01197	0.994117	1.0246	1.02122	1.001	1.10263	0.986985	1	0.940259	0.997104	1.0203	0.972486	0.973167	0.971416
520	chr2	65392922	65965272	1.03004	1.24147	1.0141	1.02644	0.753294	1.03138	1.0008	1.04865	1.04896	0.997503	0.980395	1.0026	0.998901	0.998102	1.02041	1.0203	1.02583	1.02665	0.990446	1.01613	1.01035	1.13974	1.00371	0.979611	1.02	1.02757	0.970154	1.02337	0.972486	1.05781	1.0319	0.96996	1.01197	0.994117	1.0246	1.02122	1.001	1.10263	0.986985	1	0.940259	0.997104	1.0203	0.972486	0.973167	0.971416
521	chr2	65965273	66529727	1.03004	1.24147	1.0141	1.02644	0.753294	1.03138	1.0008	1.04865	1.04896	0.997503	0.980395	1.0026	0.998901	0.998102	1.02041	1.0203	1.02583	1.02665	0.990446	1.01613	1.01035	1.13974	1.00371	0.979611	1.02	1.02757	0.970154	1.02337	0.972486	1.05781	1.0319	0.96996	1.01197	0.994117	1.0246	1.02122	1.001	1.10263	0.986985	1	0.940259	0.997104	1.0203	0.972486	0.973167	0.971416
522	chr2	66529728	67114299	1.03004	1.24147	1.0141	1.02644	0.753294	1.03138	1.0008	1.04865	1.04896	0.997503	0.980395	1.0026	0.998901	0.998102	1.02041	1.0203	1.02583	1.02665	0.990446	1.01613	1.01035	1.13974	1.00371	0.979611	1.02	1.02757	0.970154	1.02337	0.972486	1.05781	1.0319	0.96996	1.01197	0.994117	1.0246	1.02122	1.001	1.10263	0.986985	1	0.940259	0.997104	1.0203	0.972486	0.973167	0.971416
523	chr2	67114300	67686289	1.03004	1.24147	1.0141	1.02644	0.753294	1.03138	1.0008	1.04865	1.04896	0.997503	0.980395	1.0026	0.998901	0.998102	1.02041	1.0203	1.02583	1.02665	0.990446	1.01613	1.01035	1.13974	1.00371	0.979611	1.02	1.02757	0.970154	1.02337	0.972486	1.05781	1.0319	0.96996	1.01197	0.994117	1.0246	1.02122	1.001	1.10263	0.986985	1	0.940259	0.997104	1.0203	0.972486	0.973167	0.971416
524	chr2	67686290	68214069	1.03004	1.24147	1.0141	1.02644	0.753294	1.03138	1.0008	1.04865	1.04896	0.997503	0.980395	1.0026	0.998901	0.998102	1.02041	1.0203	1.02583	1.02665	0.990446	1.01613	1.01035	1.13974	1.00371	0.979611	1.02	1.02757	0.970154	1.02337	0.972486	1.05781	1.0319	0.96996	1.01197	0.994117	1.0246	1.02122	1.001	1.10263	0.986985	1	0.940259	0.997104	1.0203	0.972486	0.973167	0.971416
525	chr2	68214070	68818686	1.03004	1.24147	1.0141	1.02644	0.753294	1.03138	1.0008	1.04865	1.04896	0.997503	0.980395	1.0026	0.998901	0.998102	1.02041	1.0203	1.02583	1.02665	0.990446	1.01613	1.01035	1.13974	1.00371	0.979611	1.02	1.02757	0.970154	1.02337	0.972486	1.05781	1.0319	0.96996	1.01197	0.994117	1.0246	1.02122	1.001	1.10263	0.986985	1	0.940259	0.997104	1.0203	0.972486	0.973167	0.971416
526	chr2	68818687	69360164	1.03004	1.24147	1.0141	1.02644	0.753294	1.03138	1.0008	1.04865	1.04896	0.997503	0.980395	1.0026	0.998901	0.998102	1.02041	1.0203	1.02583	1.02665	0.990446	1.01613	1.01035	1.13974	1.00371	0.979611	1.02	1.02757	0.970154	1.02337	0.972486	1.05781	1.0319	0.96996	1.01197	0.994117	1.0246	1.02122	1.001	1.10263	0.986985	1	0.940259	0.997104	1.0203	0.972486	0.973167	0.971416
527	chr2	69360165	69874210	1.03004	1.24147	1.0141	1.02644	0.753294	1.03138	1.0008	1.04865	1.04896	0.997503	0.980395	1.0026	0.998901	0.998102	1.02041	1.0203	1.02583	1.02665	0.990446	1.01613	1.01035	1.13974	1.00371	0.979611	1.02	1.02757	0.970154	1.02337	0.972486	1.05781	1.0319	0.96996	1.01197	0.994117	1.0246	1.02122	1.001	1.10263	0.986985	1	0.940259	0.997104	1.0203	0.972486	0.973167	0.971416
528	chr2	69874211	70410720	1.03004	1.24147	1.0141	1.02644	0.753294	1.03138	1.0008	1.04865	1.04896	0.997503	0.980395	1.0026	0.998901	0.998102	1.02041	1.0203	1.02583	1.02665	0.990446	1.01613	1.01035	1.13974	1.00371	0.979611	1.02	1.02757	0.970154	1.02337	0.972486	1.05781	1.0319	0.96996	1.01197	0.994117	1.0246	1.02122	1.001	1.10263	0.986985	1	0.940259	0.997104	1.0203	0.972486	0.973167	0.971416
529	chr2	70410721	70934072	1.03004	1.24147	1.0141	1.02644	0.753294	1.03138	1.0008	1.04865	1.04896	0.997503	0.980395	1.0026	0.998901	0.998102	1.02041	1.0203	1.02583	1.02665	0.990446	1.01613	1.01035	1.13974	1.00371	0.979611	1.02	1.02757	0.970154	1.02337	0.972486	1.05781	1.0319	0.96996	1.01197	0.994117	1.0246	1.02122	1.001	1.10263	0.986985	1	0.940259	0.997104	1.0203	0.972486	0.973167	0.971416
530	chr2	70934073	71469366	1.03004	1.24147	1.0141	1.02644	0.753294	1.03138	1.0008	1.04865	1.04896	0.997503	0.980395	1.0026	0.998901	0.998102	1.02041	1.0203	1.02583	1.02665	0.990446	1.01613	1.01035	1.13974	1.00371	0.979611	1.02	1.02757	0.970154	1.02337	0.972486	1.05781	1.0319	0.96996	1.01197	0.994117	1.0246	1.02122	1.001	1.10263	0.986985	1	0.940259	0.997104	1.0203	0.972486	0.973167	0.971416
531	chr2	71469367	72010329	1.03004	1.24147	1.0141	1.02644	0.753294	1.03138	1.0008	1.04865	1.04896	0.997503	0.980395	1.0026	0.998901	0.998102	1.02041	1.0203	1.02583	1.02665	0.990446	1.01613	1.01035	1.13974	1.00371	0.979611	1.02	1.02757	0.970154	1.02337	0.972486	1.05781	1.0319	0.96996	1.01197	0.994117	1.0246	1.02122	1.001	1.10263	0.986985	1	0.940259	0.997104	1.0203	0.972486	0.973167	0.971416
532	chr2	72010330	72551593	1.03004	1.24147	1.0141	1.02644	0.753294	1.03138	1.0008	1.04865	1.04896	0.997503	0.980395	1.0026	0.998901	0.998102	1.02041	1.0203	1.02583	1.02665	0.990446	1.01613	1.01035	1.13974	1.00371	0.979611	1.02	1.02757	0.970154	1.02337	0.972486	1.05781	1.0319	0.96996	1.01197	0.994117	1.0246	1.02122	1.001	1.10263	0.986985	1	0.940259	0.997104	1.0203	0.972486	0.973167	0.971416
533	chr2	72551594	73132611	1.03004	1.24147	1.0141	1.02644	0.753294	1.03138	1.0008	1.04865	1.04896	0.997503	0.980395	1.0026	0.998901	0.998102	1.02041	1.0203	1.02583	1.02665	0.990446	1.01613	1.01035	1.13974	1.00371	0.979611	1.02	1.02757	0.970154	1.02337	0.972486	1.05781	1.0319	0.96996	1.01197	0.994117	1.0246	1.02122	1.001	1.10263	0.986985	1	0.940259	0.997104	1.0203	0.972486	0.973167	0.971416
534	chr2	73132612	73679991	1.03004	1.24147	1.0141	1.02644	0.753294	1.03138	1.0008	1.04865	1.04896	0.997503	0.980395	1.0026	0.998901	0.998102	1.02041	1.0203	1.02583	1.02665	0.990446	1.01613	1.01035	1.13974	1.00371	0.979611	1.02	1.02757	0.970154	1.02337	0.972486	1.05781	1.0319	0.96996	1.01197	0.994117	1.0246	1.02122	1.001	1.10263	0.986985	1	0.940259	0.997104	1.0203	0.972486	0.973167	0.971416
535	chr2	73679992	74208964	1.03004	1.24147	1.0141	1.02644	0.969379	1.03138	1.0008	1.04865	1.04896	0.997503	0.980395	1.0026	0.998901	0.998102	1.02041	1.0203	1.02583	1.02665	0.990446	1.01613	1.01035	1.13974	1.00371	0.979611	1.02	1.02757	0.970154	1.02337	0.972486	1.05781	1.0319	0.96996	1.01197	0.994117	1.0246	1.02122	1.001	1.10263	0.986985	1	0.940259	0.997104	1.0203	0.972486	0.973167	0.971416
536	chr2	74208965	74746513	1.03004	1.24147	1.0141	1.02644	0.969379	1.03138	1.0008	1.04865	1.04896	0.997503	0.980395	1.0026	0.998901	0.998102	1.02041	1.0203	1.02583	1.02665	0.990446	1.01613	1.01035	1.13974	1.00371	0.979611	1.02	1.02757	0.970154	1.02337	0.972486	1.05781	1.0319	0.96996	1.01197	0.994117	1.0246	1.02122	1.001	1.10263	0.986985	1	0.940259	0.997104	1.0203	0.972486	0.973167	0.971416
537	chr2	74746514	75276448	1.03004	1.24147	1.0141	1.02644	0.969379	1.03138	1.0008	1.04865	1.04896	0.997503	0.980395	1.0026	0.998901	0.998102	1.02041	1.0203	1.02583	1.02665	0.990446	1.01613	1.01035	1.13974	1.00371	0.979611	1.02	1.02757	0.970154	1.02337	0.972486	1.05781	1.0319	0.96996	1.01197	0.994117	1.0246	1.02122	1.001	1.10263	0.986985	1	0.940259	0.997104	1.0203	0.972486	0.973167	0.971416
538	chr2	75276449	75824085	1.03004	1.24147	1.0141	1.02644	0.969379	1.03138	1.0008	1.04865	1.04896	0.997503	0.980395	1.0026	0.998901	0.998102	1.02041	1.0203	1.02583	1.02665	0.990446	1.01613	1.01035	1.13974	1.00371	0.979611	1.02	1.02757	0.970154	1.02337	0.972486	1.05781	1.0319	0.96996	1.01197	0.994117	1.0246	1.02122	1.001	1.10263	0.986985	1	0.940259	0.997104	1.0203	0.972486	0.973167	0.971416
539	chr2	75824086	76420690	1.03004	1.24147	1.0141	1.02644	0.969379	1.03138	1.0008	1.04865	1.04896	0.997503	0.980395	1.0026	0.998901	0.998102	1.02041	1.0203	1.02583	1.02665	0.990446	1.01613	1.01035	1.13974	1.00371	0.979611	1.02	1.02757	0.970154	1.02337	0.972486	1.05781	1.0319	0.96996	1.01197	0.994117	1.0246	1.02122	1.001	1.10263	0.986985	1	0.940259	0.997104	1.0203	0.972486	0.973167	0.971416
540	chr2	76420691	77054426	1.03004	1.24147	1.0141	1.02644	0.969379	1.03138	1.0008	1.04865	1.04896	0.997503	0.980395	1.0026	0.998901	0.998102	1.02041	1.0203	1.02583	1.02665	0.990446	1.01613	1.01035	1.13974	1.00371	0.979611	1.02	1.02757	0.970154	1.02337	0.972486	1.05781	1.0319	0.96996	1.01197	0.994117	1.0246	1.02122	1.001	1.10263	0.986985	1	0.940259	0.997104	1.0203	0.972486	0.973167	0.971416
541	chr2	77054427	77721735	1.03004	1.24147	1.0141	1.02644	0.969379	1.03138	1.0008	1.04865	1.04896	0.997503	0.980395	1.0026	0.998901	0.998102	1.02041	1.0203	1.02583	1.02665	0.990446	1.01613	1.01035	1.13974	1.00371	0.979611	1.02	1.02757	0.970154	1.02337	0.972486	1.05781	1.0319	0.96996	1.01197	0.994117	1.0246	1.02122	1.001	1.10263	0.986985	1	0.940259	0.997104	1.0203	0.972486	0.973167	0.971416
542	chr2	77721736	78396336	1.03004	1.24147	1.0141	1.02644	0.969379	1.03138	1.0008	1.04865	1.04896	0.997503	0.980395	1.0026	0.998901	0.998102	1.02041	1.0203	1.02583	1.02665	0.990446	1.01613	1.01035	1.13974	1.00371	0.979611	1.02	1.02757	0.970154	1.02337	0.972486	1.05781	1.0319	0.96996	1.01197	0.994117	1.0246	1.02122	1.001	1.10263	0.986985	1	0.940259	0.997104	1.0203	0.972486	0.973167	0.971416
543	chr2	78396337	79077951	1.03004	1.24147	1.0141	1.02644	0.969379	1.03138	1.0008	1.04865	1.04896	0.997503	0.980395	1.0026	0.998901	0.998102	1.02041	1.0203	1.02583	1.02665	0.990446	1.01613	1.01035	1.13974	1.00371	0.979611	1.02	1.02757	0.970154	1.02337	0.972486	1.05781	1.0319	0.96996	1.01197	0.994117	1.0246	1.02122	1.001	1.10263	0.986985	1	0.940259	0.997104	1.0203	0.972486	0.973167	0.971416
544	chr2	79077952	79686895	1.03004	1.24147	1.0141	1.02644	0.969379	1.03138	1.0008	1.04865	1.04896	0.997503	0.980395	1.0026	0.998901	0.998102	1.02041	1.0203	1.02583	1.02665	0.990446	1.01613	1.01035	1.13974	1.00371	0.979611	1.02	1.02757	0.970154	1.02337	0.972486	1.05781	1.0319	0.96996	1.01197	0.994117	1.0246	1.02122	1.001	1.10263	0.986985	1	0.940259	0.997104	1.0203	0.972486	0.973167	0.971416
545	chr2	79686896	80309846	1.03004	1.24147	1.0141	1.02644	0.969379	1.03138	1.0008	1.04865	1.04896	0.997503	0.980395	1.0026	0.998901	0.998102	1.02041	1.0203	1.02583	1.02665	0.990446	1.01613	1.01035	1.13974	1.00371	0.979611	1.02	1.02757	0.970154	1.02337	0.972486	1.05781	1.0319	0.96996	1.01197	0.994117	1.0246	1.02122	1.001	1.10263	0.986985	1	0.940259	0.997104	1.0203	0.972486	0.973167	0.971416
546	chr2	80309847	80881050	1.03004	1.24147	1.0141	1.02644	0.969379	1.03138	1.0008	1.04865	1.04896	0.997503	0.980395	1.0026	0.998901	0.998102	1.02041	1.0203	1.02583	1.02665	0.990446	1.01613	1.01035	1.13974	1.00371	0.979611	1.02	1.02757	0.970154	1.02337	0.972486	1.05781	1.0319	0.96996	1.01197	0.994117	1.0246	1.02122	1.001	1.10263	0.986985	1	0.940259	0.997104	1.0203	0.972486	0.973167	0.971416
547	chr2	80881051	81525673	1.03004	1.24147	1.0141	1.02644	0.969379	1.03138	1.0008	1.04865	1.04896	0.997503	0.980395	1.0026	0.998901	0.998102	1.02041	1.0203	1.02583	1.02665	0.990446	1.01613	1.01035	1.13974	1.00371	0.979611	1.02	1.02757	0.970154	1.02337	0.972486	1.05781	1.0319	0.96996	1.01197	0.994117	1.0246	1.02122	1.001	1.10263	0.986985	1	0.940259	0.997104	1.0203	0.972486	0.973167	0.971416
548	chr2	81525674	82188437	1.03004	1.24147	1.0141	1.02644	0.969379	1.03138	1.0008	1.04865	1.04896	0.997503	0.980395	1.0026	0.998901	0.998102	1.02041	1.0203	1.02583	1.02665	0.990446	1.01613	1.01035	1.13974	1.00371	0.979611	1.02	1.02757	0.970154	1.02337	0.972486	1.05781	1.0319	0.96996	1.01197	0.994117	1.0246	1.02122	1.001	1.10263	0.986985	1	0.940259	0.997104	1.0203	0.972486	0.973167	0.971416
549	chr2	82188438	82849380	1.03004	1.24147	1.0141	1.02644	0.969379	1.03138	1.0008	1.04865	1.04896	0.997503	0.980395	1.0026	0.998901	0.998102	1.02041	1.0203	1.02583	1.02665	0.990446	1.01613	1.01035	1.13974	1.00371	0.979611	1.02	1.02757	0.970154	1.02337	0.972486	1.05781	1.0319	0.96996	1.01197	0.994117	1.0246	1.02122	1.001	1.10263	0.986985	1	0.940259	0.997104	1.0203	0.972486	0.973167	0.971416
550	chr2	82849381	83522916	1.03004	1.24147	1.0141	1.02644	0.969379	1.03138	1.0008	1.04865	1.04896	0.997503	0.980395	1.0026	0.998901	0.998102	1.02041	1.0203	1.02583	1.02665	0.990446	1.01613	1.01035	1.13974	1.00371	0.979611	1.02	1.02757	0.970154	1.02337	0.972486	1.05781	1.0319	0.96996	1.01197	0.994117	1.0246	1.02122	1.001	1.10263	0.986985	1	0.940259	0.997104	1.0203	0.972486	0.973167	0.971416
551	chr2	83522917	84187079	1.03004	1.24147	1.0141	1.02644	0.969379	1.03138	1.0008	1.04865	1.04896	0.997503	0.980395	1.0026	0.998901	0.998102	1.02041	1.0203	1.02583	1.02665	0.990446	1.01613	1.01035	1.13974	1.00371	0.979611	1.02	1.02757	0.970154	1.02337	0.972486	1.05781	1.0319	0.96996	1.01197	0.994117	1.0246	1.02122	1.001	1.10263	0.986985	1	0.940259	0.997104	1.0203	0.972486	0.973167	0.971416
552	chr2	84187080	84773604	1.03004	1.24147	1.0141	1.02644	0.969379	1.03138	1.0008	1.04865	1.04896	0.997503	0.980395	1.0026	0.998901	0.998102	1.02041	1.0203	1.02583	1.02665	0.990446	1.01613	1.01035	1.13974	1.00371	0.979611	1.02	1.02757	0.970154	1.02337	0.972486	1.05781	1.0319	0.96996	1.01197	0.994117	1.0246	1.02122	1.001	1.10263	0.986985	1	0.940259	0.997104	1.0203	0.972486	0.973167	0.971416
553	chr2	84773605	85341617	1.03004	1.24147	1.0141	1.02644	0.969379	1.03138	1.0008	1.04865	1.04896	0.997503	0.980395	1.0026	0.998901	0.998102	1.02041	1.0203	1.02583	1.02665	0.990446	1.01613	1.01035	1.13974	1.00371	0.979611	1.02	1.02757	0.970154	1.02337	0.972486	1.05781	1.0319	0.96996	1.01197	0.994117	1.0246	1.02122	1.001	1.10263	0.986985	1	0.940259	0.997104	1.0203	0.972486	0.973167	0.971416
554	chr2	85341618	85881287	1.03004	1.24147	1.0141	1.02644	0.969379	1.03138	1.0008	1.04865	1.04896	0.997503	0.980395	1.0026	0.998901	0.998102	1.02041	1.0203	1.02583	1.02665	0.990446	1.01613	1.01035	1.13974	1.00371	0.979611	1.02	1.02757	0.970154	1.02337	0.972486	1.05781	1.0319	0.96996	1.01197	0.994117	1.0246	1.02122	1.001	1.10263	0.986985	1	0.940259	0.997104	1.0203	0.972486	0.973167	0.971416
555	chr2	85881288	86385617	1.03004	1.24147	1.0141	1.02644	0.969379	1.03138	1.0008	1.04865	1.04896	0.997503	0.980395	1.0026	0.998901	0.998102	1.02041	1.0203	1.02583	1.02665	0.990446	1.01613	1.01035	1.13974	1.00371	0.979611	1.02	1.02757	0.970154	1.02337	0.972486	1.05781	1.0319	0.96996	1.01197	0.994117	1.0246	1.02122	1.001	1.10263	0.986985	1	0.940259	0.997104	1.0203	0.972486	0.973167	0.971416
556	chr2	86385618	86952224	1.03004	1.24147	1.0141	1.02644	0.969379	1.03138	1.0008	1.04865	1.04896	0.997503	0.980395	1.0026	0.998901	0.998102	1.02041	1.0203	1.02583	1.02665	0.990446	1.01613	1.01035	1.13974	1.00371	0.979611	1.02	1.02757	0.970154	1.02337	0.972486	1.05781	1.0319	0.96996	1.01197	0.994117	1.0246	1.02122	1.001	1.10263	0.986985	1	0.940259	0.997104	1.0203	0.972486	0.973167	0.971416
557	chr2	86952225	87406383	1.03004	1.24147	1.0141	1.02644	0.969379	1.03138	1.0008	1.04865	1.04896	0.997503	0.980395	1.0026	0.998901	0.998102	1.02041	1.0203	1.02583	1.02665	0.990446	1.01613	1.01035	1.13974	1.00371	0.979611	1.02	1.02757	0.970154	1.02337	0.972486	1.05781	1.0319	0.96996	1.01197	0.994117	1.0246	1.02122	1.001	1.10263	0.986985	1	0.940259	0.997104	1.0203	0.972486	0.973167	0.971416
558	chr2	87406384	87856190	1.03004	1.24147	1.0141	1.02644	0.969379	1.03138	1.0008	1.04865	1.04896	0.997503	0.980395	1.0026	0.998901	0.998102	1.02041	1.0203	1.02583	1.02665	0.990446	1.01613	1.01035	1.13974	1.00371	0.979611	1.02	1.02757	0.970154	1.02337	0.972486	1.05781	1.0319	0.96996	1.01197	0.994117	1.0246	1.02122	1.001	1.10263	0.986985	1	0.940259	0.997104	1.0203	0.972486	0.973167	0.971416
559	chr2	87856191	88313313	1.03004	1.24147	1.0141	1.02644	0.969379	1.03138	1.0008	1.04865	1.04896	0.997503	0.980395	1.0026	0.998901	0.998102	1.02041	1.0203	1.02583	1.02665	0.990446	1.01613	1.01035	1.13974	1.00371	0.979611	1.02	1.02757	0.970154	1.02337	0.972486	1.05781	1.0319	0.96996	1.01197	0.994117	1.0246	1.02122	1.001	1.10263	0.986985	1	0.940259	0.997104	1.0203	0.972486	0.973167	0.971416
560	chr2	88313314	88882051	1.03004	1.24147	1.0141	1.02644	0.969379	1.03138	1.0008	1.04865	1.04896	0.997503	0.980395	1.0026	0.998901	0.998102	1.02041	1.0203	1.02583	1.02665	0.990446	1.01613	1.01035	1.13974	1.00371	0.979611	1.02	1.02757	0.970154	1.02337	0.972486	1.05781	1.0319	0.96996	1.01197	0.994117	1.0246	1.02122	1.001	1.10263	0.986985	1	0.940259	0.997104	1.0203	0.972486	0.973167	0.971416
561	chr2	88882052	89438130	1.03004	1.24147	1.0141	1.02644	0.969379	1.03138	1.0008	1.04865	1.04896	0.997503	0.980395	1.0026	0.998901	0.998102	1.02041	1.0203	1.02583	1.02665	0.990446	1.01613	1.01035	1.13974	1.00371	0.979611	1.02	1.02757	0.970154	1.02337	0.972486	1.05781	1.0319	0.96996	1.01197	0.994117	1.0246	1.02122	1.001	1.10263	0.986985	1	0.940259	0.997104	1.0203	0.972486	0.973167	0.971416
562	chr2	89438131	90043760	1.03004	1.24147	1.0141	1.02644	0.969379	1.03138	1.0008	1.04865	1.04896	0.997503	0.980395	1.0026	0.998901	0.998102	1.02041	1.0203	1.02583	1.02665	0.990446	1.01613	1.01035	1.13974	1.00371	0.979611	1.02	1.02757	0.970154	1.02337	0.972486	1.05781	1.0319	0.96996	1.01197	0.994117	1.0246	1.02122	1.001	1.10263	0.986985	1	0.940259	0.997104	1.0203	0.972486	0.973167	0.971416
563	chr2	90043761	90396700	1.03004	1.24147	1.0141	1.02644	0.969379	1.03138	1.0008	1.04865	1.04896	0.997503	0.980395	1.0026	0.998901	0.998102	1.02041	1.0203	1.02583	1.02665	0.990446	1.01613	1.01035	1.13974	1.00371	0.979611	1.02	1.02757	0.970154	1.02337	0.972486	1.05781	1.0319	0.96996	1.01197	0.994117	1.0246	1.02122	1.001	1.10263	0.986985	1	1.37177	0.997104	1.0203	0.972486	0.973167	0.971416
564	chr2	90396701	91623196	1.03004	1.24147	1.0141	1.02644	0.969379	1.03138	1.0008	1.04865	1.04896	0.997503	0.980395	1.0026	0.998901	0.998102	1.02041	1.0203	1.02583	1.02665	0.990446	1.01613	1.01035	1.13974	0.520586	0.979611	1.02	1.02757	0.970154	1.02337	0.972486	1.05781	1.0319	0.96996	1.01197	0.994117	1.0246	1.02122	1.001	1.10263	0.986985	1	1.37177	0.997104	1.0203	0.972486	0.973167	0.971416
565	chr2	91623197	91788929	1.03004	1.24147	1.0141	1.02644	0.969379	1.03138	1.0008	1.04865	1.04896	0.997503	0.980395	1.0026	0.998901	0.998102	1.02041	1.0203	1.02583	1.02665	0.990446	1.01613	1.01035	1.13974	0.520586	0.979611	1.02	1.02757	0.970154	1.02337	0.972486	1.05781	1.0319	0.96996	1.01197	0.994117	1.0246	1.02122	1.001	1.10263	0.986985	1	1.37177	0.997104	1.0203	0.972486	0.973167	0.971416
566	chr2	91788930	91950622	1.03004	1.24147	1.0141	1.02644	0.969379	1.03138	1.0008	1.04865	1.04896	0.997503	0.980395	1.0026	0.998901	1.502	1.02041	1.0203	1.02583	1.02665	0.990446	1.01613	1.01035	1.13974	0.520586	0.979611	1.02	1.02757	0.970154	1.02337	0.972486	1.05781	1.0319	0.96996	1.01197	0.994117	1.0246	1.02122	1.001	1.10263	0.986985	1	1.37177	0.997104	1.0203	0.972486	0.973167	0.971416
567	chr2	91950623	92266805	1.03004	1.24147	1.0141	1.93537	0.969379	1.03138	2.23044	1.04865	1.04896	0.997503	0.980395	1.0026	0.998901	1.502	1.02041	1.0203	1.02583	1.02665	0.990446	1.87274	1.01035	1.13974	1.02143	0.979611	2.02263	1.02757	0.970154	1.02337	0.972486	1.05781	1.0319	0.96996	1.01197	0.994117	1.0246	1.02122	1.001	1.10263	0.986985	1	1.37177	0.997104	1.0203	0.972486	0.973167	0.971416
568	chr2	92266806	92313616	2.01275	1.24147	1.0141	1.93537	1.94975	1.03138	2.23044	1.04865	1.04896	0.997503	0.980395	1.0026	0.998901	1.502	1.02041	1.0203	1.02583	1.02665	0.990446	1.87274	1.83015	2.38954	1.02143	0.979611	2.02263	1.70796	0.970154	1.02337	1.90408	1.05781	1.78104	0.96996	1.01197	0.994117	1.68388	1.02122	1.001	1.10263	0.986985	1	1.37177	0.997104	1.0203	0.972486	1.80995	1.57035
569	chr2	92313617	95480405	2.01275	1.24147	1.0141	1.93537	1.94975	1.03138	2.23044	1.04865	1.04896	0.997503	0.980395	1.0026	0.998901	1.502	1.02041	1.0203	1.02583	1.02665	0.990446	1.87274	1.83015	2.38954	1.02143	0.979611	2.02263	1.70796	0.970154	1.02337	1.90408	1.05781	1.78104	0.96996	1.01197	0.994117	1.68388	1.02122	1.001	1.10263	0.986985	1	1.37177	0.997104	1.0203	0.972486	1.80995	1.57035
570	chr2	95480406	96029491	1.00662	1.24147	1.0141	0.880998	1	1.03138	1.03521	1.04865	1.04896	0.997503	0.980395	1.0026	0.998901	0.994316	1.02041	1.0203	1.02583	1.02665	0.990446	0.981474	1.05159	1.07272	1.02143	0.979611	1.02511	0.997603	0.970154	1.02337	0.98334	1.05781	0.998002	0.96996	1.01197	0.994117	1.68388	1.02122	1.001	1.10263	0.986985	1	1.37177	0.997104	1.0203	0.972486	0.985112	0.980395
571	chr2	96029492	96477519	1.00662	1.24147	1.0141	0.880998	1	1.03138	1.03521	1.04865	1.04896	0.997503	0.980395	1.0026	0.998901	0.994316	1.02041	1.0203	1.02583	1.02665	0.990446	0.981474	1.05159	1.07272	1.02143	0.979611	1.02511	0.997603	0.970154	1.02337	0.98334	1.05781	0.998002	0.96996	1.01197	0.994117	1.68388	1.02122	1.001	1.10263	0.986985	1	1.37177	0.997104	1.0203	0.972486	0.985112	0.980395
572	chr2	96477520	97000036	1.00662	1.24147	1.0141	0.880998	1	1.03138	1.03521	1.04865	1.04896	0.997503	0.980395	1.0026	0.998901	0.994316	1.02041	1.0203	1.02583	1.02665	0.990446	0.981474	1.05159	1.07272	1.02143	0.979611	1.02511	0.997603	0.970154	1.02337	0.98334	1.05781	0.998002	0.96996	1.01197	0.994117	1.68388	1.02122	1.001	1.10263	0.986985	1	0.96358	0.997104	1.0203	0.972486	0.985112	0.980395
573	chr2	97000037	97577219	1.00662	1.24147	1.0141	0.880998	1	1.03138	1.03521	1.04865	1.04896	0.997503	0.980395	1.0026	0.998901	0.994316	1.02041	1.0203	1.02583	1.02665	0.990446	0.981474	1.05159	1.07272	1.02143	0.979611	1.02511	0.997603	0.970154	1.02337	0.98334	1.05781	0.998002	0.96996	1.01197	0.994117	1.68388	1.02122	1.001	1.10263	0.986985	1	0.96358	0.997104	1.0203	0.972486	0.985112	0.980395
574	chr2	97577220	98061464	1.00662	1.24147	1.0141	0.880998	1	1.03138	1.03521	1.04865	1.04896	0.997503	0.980395	1.0026	0.998901	0.994316	1.02041	1.0203	1.02583	1.02665	0.990446	0.981474	1.05159	1.07272	1.02143	0.979611	1.02511	0.997603	0.970154	1.02337	0.98334	1.05781	0.998002	0.96996	1.01197	0.994117	1.68388	1.02122	1.001	1.10263	0.986985	1	0.96358	0.997104	1.0203	0.972486	0.985112	0.980395
575	chr2	98061465	98574590	1.00662	1.24147	1.0141	0.880998	1	1.03138	1.03521	1.04865	1.04896	0.997503	0.980395	1.0026	0.998901	0.994316	1.02041	1.0203	1.02583	1.02665	0.990446	0.981474	1.05159	1.07272	1.02143	0.979611	1.02511	0.997603	0.970154	1.02337	0.98334	1.05781	0.998002	0.96996	1.01197	0.994117	1.68388	1.02122	1.001	1.10263	0.986985	1	0.96358	0.997104	1.0203	0.972486	0.985112	0.980395
576	chr2	98574591	99123023	1.00662	1.24147	1.0141	0.880998	1	1.03138	1.03521	1.04865	1.04896	0.997503	0.980395	1.0026	0.998901	0.994316	1.02041	1.0203	1.02583	1.02665	0.990446	0.981474	1.05159	1.07272	1.02143	0.979611	1.02511	0.997603	0.970154	1.02337	0.98334	1.05781	0.998002	0.96996	1.01197	0.994117	1.00975	1.02122	1.001	1.10263	0.986985	1	0.96358	0.997104	1.0203	0.972486	0.985112	0.980395
577	chr2	99123024	99669347	1.00662	1.24147	1.0141	0.880998	1	1.03138	1.03521	1.04865	1.04896	0.997503	0.980395	1.0026	0.998901	0.994316	1.02041	1.0203	1.02583	1.02665	0.990446	0.981474	1.05159	1.07272	1.02143	0.979611	1.02511	0.997603	0.970154	1.02337	0.98334	1.05781	0.998002	0.96996	1.01197	0.994117	1.00975	1.02122	1.001	1.10263	0.986985	1	0.96358	0.997104	1.0203	0.972486	0.985112	0.980395
578	chr2	99669348	100247789	1.00662	1.24147	1.0141	0.880998	1	1.03138	1.03521	1.04865	1.04896	0.997503	0.980395	1.0026	0.998901	0.994316	1.02041	1.0203	1.02583	1.02665	0.990446	0.981474	1.05159	1.07272	1.02143	0.979611	1.02511	0.997603	0.970154	1.02337	0.98334	1.05781	0.998002	0.96996	1.01197	0.994117	1.00975	1.02122	1.001	1.10263	0.986985	1	0.96358	0.997104	1.0203	0.972486	0.985112	0.980395
579	chr2	100247790	100790488	1.00662	1.24147	1.0141	0.880998	1	1.03138	1.03521	1.04865	1.04896	0.997503	0.980395	1.0026	0.998901	0.994316	1.02041	1.0203	1.02583	1.02665	0.990446	0.981474	1.05159	1.07272	1.02143	0.979611	1.02511	0.997603	0.970154	1.02337	0.98334	1.05781	0.998002	0.96996	1.01197	0.994117	1.00975	1.02122	1.001	1.10263	0.986985	1	0.96358	0.997104	1.0203	0.972486	0.985112	0.980395
580	chr2	100790489	101323799	1.00662	0.950944	1.0141	0.880998	1	1.03138	1.03521	1.04865	1.04896	0.997503	0.980395	1.0026	0.998901	0.994316	1.02041	1.0203	1.02583	1.02665	0.990446	0.981474	1.05159	1.07272	1.02143	0.979611	1.02511	0.997603	0.970154	1.02337	0.98334	1.05781	0.998002	0.96996	1.01197	0.994117	1.00975	1.02122	1.001	1.10263	0.986985	1	0.96358	0.997104	1.0203	0.972486	0.985112	0.980395
581	chr2	101323800	101861752	1.00662	0.950944	1.0141	0.880998	1	1.03138	1.03521	1.04865	1.04896	0.997503	0.980395	1.0026	0.998901	0.994316	1.02041	1.0203	1.02583	1.02665	0.990446	0.981474	1.05159	1.07272	1.02143	0.979611	1.02511	0.997603	0.970154	1.02337	0.98334	1.05781	0.998002	0.96996	1.01197	0.994117	1.00975	1.02122	1.001	1.10263	0.986985	1	0.96358	0.997104	1.0203	0.972486	0.985112	0.980395
582	chr2	101861753	102414623	1.00662	0.950944	1.0141	0.880998	1	1.03138	1.03521	1.04865	1.04896	0.997503	0.980395	1.0026	0.998901	0.994316	1.02041	1.0203	1.02583	1.02665	0.990446	0.981474	1.05159	1.07272	1.02143	0.979611	1.02511	0.997603	0.970154	1.02337	0.98334	1.05781	0.998002	0.96996	1.01197	0.994117	1.00975	1.02122	1.001	1.10263	0.986985	1	0.96358	0.997104	1.0203	0.972486	0.985112	0.980395
583	chr2	102414624	102934720	1.00662	0.950944	1.0141	0.880998	1	1.03138	1.03521	1.04865	1.04896	0.997503	0.980395	1.0026	0.998901	0.994316	1.02041	1.0203	1.02583	1.02665	0.990446	0.981474	1.05159	1.07272	1.02143	0.979611	1.02511	0.997603	0.970154	1.02337	0.98334	1.05781	0.998002	0.96996	1.01197	0.994117	1.00975	1.02122	1.001	1.10263	0.986985	1	0.96358	0.997104	1.0203	0.972486	0.985112	0.980395
584	chr2	102934721	103521338	1.00662	0.950944	1.0141	0.880998	1	1.03138	1.03521	1.04865	1.04896	0.997503	0.980395	1.0026	0.998901	0.994316	1.02041	1.0203	1.02583	1.02665	0.990446	0.981474	1.05159	1.07272	1.02143	0.979611	1.02511	0.997603	0.970154	1.02337	0.98334	1.05781	0.998002	0.96996	1.01197	0.994117	1.00975	1.02122	1.001	1.10263	0.986985	1	0.96358	0.997104	1.0203	0.972486	0.985112	0.980395
585	chr2	103521339	104118937	1.00662	0.950944	1.0141	0.880998	1	1.03138	1.03521	1.04865	1.04896	0.997503	0.980395	1.0026	0.998901	0.994316	1.02041	1.0203	1.02583	1.02665	0.990446	0.981474	1.05159	1.07272	1.02143	0.979611	1.02511	0.997603	0.970154	1.02337	0.98334	1.05781	0.998002	0.96996	1.01197	0.994117	1.00975	1.02122	1.001	1.10263	0.986985	1	0.96358	0.997104	1.0203	0.972486	0.985112	0.980395
586	chr2	104118938	104756436	1.00662	0.950944	1.0141	0.880998	1	1.03138	1.03521	1.04865	1.04896	0.997503	0.980395	1.0026	0.998901	0.994316	1.02041	1.0203	1.02583	1.02665	0.990446	0.981474	1.05159	1.07272	1.02143	0.979611	1.02511	0.997603	0.970154	1.02337	0.98334	1.05781	0.998002	0.96996	1.01197	0.994117	1.00975	1.02122	1.001	1.10263	0.986985	1	0.96358	0.997104	1.0203	0.972486	0.985112	0.980395
587	chr2	104756437	105343470	1.00662	0.950944	1.0141	0.880998	1	1.03138	1.03521	1.04865	1.04896	0.997503	0.980395	1.0026	0.998901	0.994316	1.02041	1.0203	1.02583	1.02665	0.990446	0.981474	1.05159	1.07272	1.02143	0.979611	1.02511	0.997603	0.970154	1.02337	0.98334	1.05781	0.998002	0.96996	1.01197	0.994117	1.00975	1.02122	1.001	1.10263	0.986985	1	0.96358	0.997104	1.0203	0.972486	0.985112	0.980395
588	chr2	105343471	105904978	1.00662	0.950944	1.0141	0.880998	1	1.03138	1.03521	1.04865	1.04896	0.997503	0.980395	1.0026	0.998901	0.994316	1.02041	1.0203	1.02583	1.02665	0.990446	0.981474	1.05159	1.07272	1.02143	0.979611	1.02511	0.997603	0.970154	1.02337	0.98334	1.05781	0.998002	0.96996	1.01197	0.994117	1.00975	1.02122	1.001	1.10263	0.986985	1	0.96358	0.997104	1.0203	0.972486	0.985112	0.980395
589	chr2	105904979	106425772	1.00662	0.950944	1.0141	0.880998	1	1.03138	1.03521	1.04865	1.04896	0.997503	0.980395	1.0026	0.998901	0.994316	1.02041	1.0203	1.02583	1.02665	0.990446	0.981474	1.05159	1.07272	1.02143	0.979611	1.02511	0.997603	0.970154	1.02337	0.98334	1.05781	0.998002	0.96996	1.01197	0.994117	1.00975	1.02122	1.001	1.10263	0.986985	1	0.96358	0.997104	1.0203	0.972486	0.985112	0.980395
590	chr2	106425773	106988521	1.00662	0.950944	1.0141	0.880998	1	1.03138	1.03521	1.04865	1.04896	0.997503	0.980395	1.0026	0.998901	0.994316	1.02041	1.0203	1.02583	1.02665	0.990446	0.981474	1.05159	1.07272	1.02143	0.979611	1.02511	0.997603	0.970154	1.02337	0.98334	1.05781	0.998002	0.96996	1.01197	0.994117	1.00975	1.02122	1.001	1.10263	0.986985	1	0.96358	0.997104	1.0203	0.972486	0.985112	0.980395
591	chr2	106988522	107521543	1.00662	0.950944	1.0141	0.880998	1	1.03138	1.03521	1.04865	1.04896	0.997503	0.980395	1.0026	0.998901	0.994316	1.02041	1.0203	1.02583	1.02665	0.990446	0.981474	1.05159	1.07272	1.02143	0.979611	1.02511	0.997603	0.970154	1.02337	0.98334	1.05781	0.998002	0.96996	1.01197	0.994117	1.00975	1.02122	1.001	1.10263	0.986985	1	0.96358	0.997104	1.0203	0.972486	0.985112	0.980395
592	chr2	107521544	108131095	1.00662	0.950944	1.0141	0.880998	1	1.03138	1.03521	1.04865	1.04896	0.997503	0.980395	1.0026	0.998901	0.994316	1.02041	1.0203	1.02583	1.02665	0.990446	0.981474	1.05159	1.07272	1.02143	0.979611	1.02511	0.997603	0.970154	1.02337	0.98334	1.05781	0.998002	0.96996	1.01197	0.994117	1.00975	1.02122	1.001	1.10263	0.986985	1	0.96358	0.997104	1.0203	0.972486	0.985112	0.980395
593	chr2	108131096	108701676	1.00662	0.950944	1.0141	0.880998	1	1.03138	1.03521	1.04865	1.04896	0.997503	0.980395	1.0026	0.998901	0.994316	1.02041	1.0203	1.02583	1.02665	0.990446	0.981474	1.05159	1.07272	1.02143	0.979611	1.02511	0.997603	0.970154	1.02337	0.98334	1.05781	0.998002	0.96996	1.01197	0.994117	1.00975	1.02122	1.001	1.10263	0.986985	1	0.96358	0.997104	1.0203	0.972486	0.985112	0.980395
594	chr2	108701677	109295413	1.00662	0.950944	1.0141	1.00531	1	1.03138	1.03521	1.04865	1.04896	0.997503	0.980395	1.0026	0.998901	0.994316	1.02041	1.0203	1.02583	1.02665	0.990446	0.981474	1.05159	1.07272	1.02143	0.979611	1.02511	0.997603	0.970154	1.02337	0.98334	1.05781	0.998002	0.96996	1.01197	0.994117	1.00975	1.02122	1.001	1.10263	0.986985	1	0.96358	0.997104	1.0203	0.972486	0.985112	0.980395
595	chr2	109295414	109834054	1.00662	0.950944	1.0141	1.00531	1	1.03138	1.03521	1.04865	1.04896	0.997503	0.980395	1.0026	0.998901	0.994316	1.02041	1.0203	1.02583	1.02665	0.990446	0.981474	1.05159	1.07272	1.02143	0.979611	1.02511	0.997603	0.970154	1.02337	0.98334	1.05781	0.998002	0.96996	1.01197	0.994117	1.00975	1.02122	1.001	1.10263	0.986985	1	0.96358	0.997104	1.0203	0.972486	0.985112	0.980395
596	chr2	109834055	110478999	1.00662	0.950944	1.0141	1.00531	1	1.03138	1.03521	1.04865	1.04896	0.997503	0.980395	1.0026	0.998901	0.994316	1.02041	1.0203	1.02583	1.02665	0.990446	0.981474	1.05159	1.07272	1.02143	0.979611	1.02511	0.997603	0.970154	1.02337	0.98334	1.05781	0.998002	0.96996	1.01197	0.994117	1.00975	1.02122	1.001	1.10263	0.986985	1	0.96358	0.997104	1.0203	0.972486	0.985112	0.980395
597	chr2	110479000	110854524	1.00662	0.950944	1.0141	1.00531	1	1.03138	1.03521	1.04865	1.04896	0.997503	0.980395	1.0026	0.998901	0.994316	1.02041	1.0203	1.02583	1.02665	0.990446	0.981474	1.05159	1.07272	1.02143	0.979611	1.02511	0.997603	0.970154	1.02337	0.98334	1.05781	0.998002	0.96996	1.01197	0.994117	1.00975	1.02122	1.001	1.10263	0.986985	1	0.96358	0.997104	1.0203	0.972486	0.985112	0.980395
598	chr2	110854525	111276346	1.00662	0.950944	1.0141	1.00531	1	1.03138	1.03521	1.04865	1.04896	0.997503	0.980395	1.0026	0.998901	0.994316	1.02041	1.0203	1.02583	1.02665	0.990446	0.981474	1.05159	1.07272	1.02143	0.979611	1.02511	0.997603	0.970154	1.02337	0.98334	1.05781	0.998002	0.96996	1.01197	0.994117	1.00975	1.02122	1.001	1.10263	0.986985	1	0.96358	0.997104	1.0203	0.972486	0.985112	0.980395
599	chr2	111276347	111741156	1.00662	0.950944	1.0141	1.00531	1	1.03138	1.03521	1.04865	1.04896	0.997503	0.980395	1.0026	0.998901	0.994316	1.02041	1.0203	1.02583	1.02665	0.990446	0.981474	1.05159	1.07272	1.02143	0.979611	1.02511	0.997603	0.970154	1.02337	0.98334	1.05781	0.998002	0.96996	1.01197	0.994117	1.00975	1.02122	1.001	1.10263	0.986985	1	0.96358	0.997104	1.0203	0.972486	0.985112	0.980395
600	chr2	111741157	112186360	1.00662	0.950944	1.0141	1.00531	1	1.03138	1.03521	1.04865	1.04896	0.997503	0.980395	1.0026	0.998901	0.994316	1.02041	1.0203	1.02583	1.02665	0.990446	0.981474	1.05159	1.07272	1.02143	0.979611	1.02511	0.997603	0.970154	1.02337	0.98334	1.05781	0.998002	0.96996	1.01197	0.994117	1.00975	1.02122	1.001	1.10263	0.986985	1	0.96358	0.997104	1.0203	0.972486	0.985112	0.980395
601	chr2	112186361	112604089	1.00662	0.950944	1.0141	1.00531	1	1.03138	1.03521	1.04865	1.04896	0.997503	0.980395	1.0026	0.998901	0.994316	1.02041	1.0203	1.02583	1.02665	0.990446	0.981474	1.05159	1.07272	1.02143	0.979611	1.02511	0.997603	0.970154	1.02337	0.98334	1.05781	0.998002	0.96996	1.01197	0.994117	1.00975	1.02122	1.001	1.10263	0.986985	1	0.96358	0.997104	1.0203	0.972486	0.985112	0.980395
602	chr2	112604090	113146234	1.00662	0.950944	1.0141	1.00531	1	1.03138	1.03521	1.04865	1.04896	0.997503	0.980395	1.0026	0.998901	0.994316	1.02041	1.0203	1.02583	1.02665	0.990446	0.981474	1.05159	1.07272	1.02143	0.979611	1.02511	0.997603	0.970154	1.02337	0.98334	1.05781	0.998002	0.96996	1.01197	0.994117	1.00975	1.02122	1.001	1.10263	0.986985	1	0.96358	0.997104	1.0203	0.972486	0.985112	0.980395
603	chr2	113146235	113659427	1.00662	0.950944	1.0141	1.00531	1	1.03138	1.03521	1.04865	1.04896	0.997503	0.980395	1.0026	0.998901	0.994316	1.02041	1.0203	1.02583	1.02665	0.990446	0.981474	1.05159	1.07272	1.02143	0.979611	1.02511	0.997603	0.970154	1.02337	0.98334	1.05781	0.998002	0.96996	1.01197	0.994117	1.00975	1.02122	1.001	1.10263	0.986985	1	0.96358	0.997104	1.0203	0.972486	0.985112	0.980395
604	chr2	113659428	114189445	1.00662	0.950944	1.0141	1.00531	1	1.03138	1.03521	1.04865	1.04896	0.997503	0.980395	1.0026	0.998901	0.994316	1.02041	1.0203	1.02583	1.02665	0.990446	0.981474	1.05159	1.07272	1.02143	0.979611	1.02511	0.997603	0.970154	1.02337	0.98334	1.05781	0.998002	0.96996	1.01197	0.994117	1.00975	1.02122	1.001	1.10263	0.986985	1	0.96358	0.997104	1.0203	0.972486	0.985112	0.980395
605	chr2	114189446	114666637	1.00662	0.950944	1.0141	1.00531	1	1.03138	1.03521	1.04865	1.04896	0.997503	0.980395	1.0026	0.998901	0.994316	1.02041	1.0203	1.02583	1.02665	0.990446	0.981474	1.05159	1.07272	1.02143	0.979611	1.02511	0.997603	0.970154	1.02337	0.98334	1.05781	0.998002	0.96996	1.01197	0.994117	1.00975	1.02122	1.001	1.10263	0.986985	1	0.96358	0.997104	1.0203	0.972486	0.985112	0.980395
606	chr2	114666638	115234424	1.00662	0.950944	1.0141	1.00531	1	1.03138	1.03521	1.04865	1.04896	0.997503	0.980395	1.0026	0.998901	0.994316	1.02041	1.0203	1.02583	1.02665	0.990446	0.981474	1.05159	1.07272	1.02143	0.979611	1.02511	0.997603	0.970154	1.02337	0.98334	1.05781	0.998002	0.96996	1.01197	0.994117	1.00975	1.02122	1.001	1.10263	0.986985	1	0.96358	0.997104	1.0203	0.972486	0.985112	0.980395
607	chr2	115234425	115839906	1.00662	0.950944	1.0141	1.00531	1	1.03138	1.03521	1.04865	1.04896	0.997503	0.980395	1.0026	0.998901	0.994316	1.02041	1.0203	1.02583	1.02665	0.990446	0.981474	1.05159	1.07272	1.02143	0.979611	1.02511	0.997603	0.970154	1.02337	0.98334	1.05781	0.998002	0.96996	1.01197	0.994117	1.00975	1.02122	1.001	1.10263	0.986985	1	0.96358	0.997104	1.0203	0.972486	0.985112	0.980395
608	chr2	115839907	116509997	1.00662	0.950944	1.0141	1.00531	1	1.03138	1.03521	1.04865	1.04896	0.997503	0.980395	1.0026	0.998901	0.994316	1.02041	1.0203	1.02583	1.02665	0.990446	0.981474	1.05159	1.07272	1.02143	0.979611	1.02511	0.997603	0.970154	1.02337	0.98334	1.05781	0.998002	0.96996	1.01197	0.994117	1.00975	1.02122	1.001	1.10263	0.986985	1	0.96358	0.997104	1.0203	0.972486	0.985112	0.980395
609	chr2	116509998	117203011	1.00662	0.950944	1.0141	1.00531	1	1.03138	1.03521	1.04865	1.04896	0.997503	0.980395	1.0026	0.998901	0.994316	1.02041	1.0203	1.02583	1.02665	0.990446	0.981474	1.05159	1.07272	1.02143	0.979611	1.02511	0.997603	0.970154	1.02337	0.98334	1.05781	0.998002	0.96996	1.01197	0.994117	1.00975	1.02122	1.001	1.10263	0.986985	1	0.96358	0.997104	1.0203	0.972486	0.985112	0.980395
610	chr2	117203012	117858169	1.00662	0.950944	1.0141	1.00531	1	1.03138	1.03521	1.04865	1.04896	0.997503	0.980395	1.0026	0.998901	0.994316	1.02041	1.0203	1.02583	1.02665	0.990446	0.981474	1.05159	1.07272	1.02143	0.979611	1.02511	0.997603	0.970154	1.02337	0.98334	1.05781	0.998002	0.96996	1.01197	0.994117	1.00975	1.02122	1.001	1.10263	0.986985	1	0.96358	0.997104	1.0203	0.972486	0.985112	0.980395
611	chr2	117858170	118475096	1.00662	0.950944	1.0141	1.00531	1	1.03138	1.03521	1.04865	1.04896	0.997503	0.980395	1.0026	0.998901	0.994316	1.02041	1.0203	1.02583	1.02665	0.990446	0.981474	1.05159	1.07272	1.02143	0.979611	1.02511	0.997603	0.970154	1.02337	0.98334	1.05781	0.998002	0.96996	1.01197	0.994117	1.00975	1.02122	1.001	1.10263	0.986985	1	0.96358	0.997104	1.0203	0.972486	0.985112	0.980395
612	chr2	118475097	119034876	1.00662	0.950944	1.0141	1.00531	1	1.03138	1.03521	1.04865	1.04896	0.997503	0.980395	1.0026	0.998901	0.994316	1.02041	1.0203	1.02583	1.02665	0.990446	0.981474	1.05159	1.07272	1.02143	0.979611	1.02511	0.997603	0.970154	1.02337	0.98334	1.05781	0.998002	0.96996	1.01197	0.994117	1.00975	1.02122	1.001	1.10263	0.986985	1	0.96358	0.997104	1.0203	0.972486	0.985112	0.980395
613	chr2	119034877	119557976	1.00662	0.950944	1.0141	1.00531	1	1.03138	1.03521	1.04865	1.04896	0.997503	0.980395	1.0026	0.998901	0.994316	1.02041	1.0203	1.02583	1.02665	0.990446	0.981474	1.05159	1.07272	1.02143	0.979611	1.02511	0.997603	0.970154	1.02337	0.98334	1.05781	0.998002	0.96996	1.01197	0.994117	1.00975	1.02122	1.001	1.10263	0.986985	1	0.96358	0.997104	1.0203	0.972486	0.985112	0.980395
614	chr2	119557977	120108122	1.00662	0.950944	1.0141	1.00531	1	1.03138	1.03521	1.04865	1.04896	0.997503	0.980395	1.0026	0.998901	0.994316	1.02041	1.0203	1.02583	1.02665	0.990446	0.981474	1.05159	1.07272	1.02143	0.979611	1.02511	0.997603	0.970154	1.02337	0.98334	1.05781	0.998002	0.96996	1.01197	0.994117	1.00975	1.02122	1.001	1.10263	0.986985	1	0.96358	0.997104	1.0203	0.972486	0.985112	0.980395
615	chr2	120108123	120666063	1.00662	0.950944	1.0141	1.00531	1	1.03138	1.03521	1.04865	1.04896	0.997503	0.980395	1.0026	0.998901	0.994316	1.02041	1.0203	1.02583	1.02665	0.990446	0.981474	1.05159	1.07272	1.02143	0.979611	1.02511	0.997603	0.970154	1.02337	0.98334	1.05781	0.998002	0.96996	1.01197	0.994117	1.00975	1.02122	1.001	0.948949	0.986985	1	0.96358	0.997104	1.0203	0.972486	0.985112	0.980395
616	chr2	120666064	121234086	1.00662	0.950944	1.0141	1.00531	1	1.03138	1.03521	1.04865	1.04896	0.997503	0.980395	1.0026	0.998901	0.994316	1.02041	1.0203	1.02583	1.02665	0.990446	0.981474	1.05159	1.07272	1.02143	0.979611	1.02511	0.997603	0.970154	1.02337	0.98334	1.05781	0.998002	0.96996	1.01197	0.994117	1.00975	1.02122	1.001	0.948949	0.986985	1	0.96358	0.997104	1.0203	0.972486	0.985112	0.980395
617	chr2	121234087	121725967	1.00662	0.950944	1.0141	1.00531	1	1.03138	1.03521	1.04865	1.04896	0.997503	0.980395	1.0026	0.998901	0.994316	1.02041	1.0203	1.02583	1.02665	0.990446	0.981474	1.05159	1.07272	1.02143	0.979611	1.02511	0.997603	0.970154	1.02337	0.98334	1.05781	0.998002	0.96996	1.01197	0.994117	1.00975	1.02122	1.001	0.948949	0.986985	1	0.96358	0.997104	1.0203	0.972486	0.985112	0.980395
618	chr2	121725968	122244604	1.00662	0.950944	1.0141	1.00531	1	1.03138	1.03521	1.04865	1.04896	0.997503	0.980395	1.0026	0.998901	0.994316	1.02041	1.0203	1.02583	1.02665	0.990446	0.981474	1.05159	1.07272	1.02143	0.979611	1.02511	0.997603	0.970154	1.02337	0.98334	1.05781	0.998002	0.96996	1.01197	0.994117	1.00975	1.02122	1.001	0.948949	0.986985	1	0.96358	0.997104	1.0203	0.972486	0.985112	0.980395
619	chr2	122244605	122803166	1.00662	0.950944	1.0141	1.00531	1	1.03138	1.03521	1.04865	1.04896	0.997503	0.980395	1.0026	0.998901	0.994316	1.02041	1.0203	1.02583	1.02665	0.990446	0.981474	1.05159	1.07272	1.02143	0.979611	1.02511	0.997603	0.970154	1.02337	0.98334	1.05781	0.998002	0.96996	1.01197	0.994117	1.00975	1.02122	1.001	0.948949	0.986985	1	0.96358	0.997104	1.0203	0.972486	0.985112	0.980395
620	chr2	122803167	123377687	1.00662	0.950944	1.0141	1.00531	1	1.03138	1.03521	1.04865	1.04896	0.997503	0.980395	1.0026	0.998901	0.994316	1.02041	1.0203	1.02583	1.02665	0.990446	0.981474	1.05159	1.07272	1.02143	0.979611	1.02511	0.997603	0.970154	1.02337	0.98334	1.05781	0.998002	0.96996	1.01197	0.994117	1.00975	1.02122	1.001	0.948949	0.986985	1	0.96358	0.997104	1.0203	0.972486	0.985112	0.980395
621	chr2	123377688	123998569	1.00662	0.950944	1.0141	1.00531	1	1.03138	1.03521	1.04865	1.04896	0.997503	0.980395	1.0026	0.998901	0.994316	1.02041	1.0203	1.02583	1.02665	0.990446	0.981474	1.05159	1.07272	1.02143	0.979611	1.02511	0.997603	0.970154	1.02337	0.98334	1.05781	0.998002	0.96996	1.01197	0.994117	1.00975	1.02122	1.001	0.948949	0.986985	1	0.96358	0.997104	1.0203	0.972486	0.985112	0.980395
622	chr2	123998570	124645714	1.00662	0.950944	1.0141	1.00531	1	1.03138	1.03521	1.04865	1.04896	0.997503	0.980395	1.0026	0.998901	0.994316	1.02041	1.0203	1.02583	1.02665	0.990446	0.981474	1.05159	1.07272	1.02143	0.979611	1.02511	0.997603	0.970154	1.02337	0.98334	1.05781	0.998002	0.96996	1.01197	0.994117	1.00975	1.02122	1.001	0.948949	0.986985	1	0.96358	0.997104	1.0203	0.972486	0.985112	0.980395
623	chr2	124645715	125282154	1.00662	0.950944	1.0141	1.00531	1	1.03138	1.03521	1.04865	1.04896	0.997503	0.980395	1.0026	0.998901	0.994316	1.02041	1.0203	1.02583	1.02665	0.990446	0.981474	1.05159	1.07272	1.02143	0.979611	1.02511	0.997603	0.970154	1.02337	0.98334	1.05781	0.998002	0.96996	1.01197	0.994117	1.00975	1.02122	1.001	0.948949	0.986985	1	0.96358	0.997104	1.0203	0.972486	0.985112	0.980395
624	chr2	125282155	125898381	1.00662	0.950944	1.0141	1.00531	1	1.03138	1.03521	1.04865	1.04896	0.997503	0.980395	1.0026	0.998901	0.994316	1.02041	1.0203	1.02583	1.02665	0.990446	0.981474	1.05159	1.07272	1.02143	0.979611	1.02511	0.997603	0.970154	1.02337	0.98334	1.05781	0.998002	0.96996	1.01197	0.994117	1.00975	1.02122	1.001	0.948949	0.986985	1	0.96358	0.997104	1.0203	0.972486	0.985112	0.980395
625	chr2	125898382	126549317	1.00662	0.950944	1.0141	1.00531	1	1.03138	1.03521	1.04865	1.04896	0.997503	0.980395	1.0026	0.998901	0.994316	1.02041	1.0203	1.02583	1.02665	0.990446	0.981474	1.05159	1.07272	1.02143	0.979611	1.02511	0.997603	0.970154	1.02337	0.98334	1.05781	0.998002	0.96996	1.01197	0.994117	1.00975	1.02122	1.001	0.948949	0.986985	1	0.96358	0.997104	1.0203	0.972486	0.985112	0.980395
626	chr2	126549318	127182281	1.00662	0.950944	1.0141	1.00531	1	1.03138	1.03521	1.04865	1.04896	0.997503	0.980395	1.0026	0.998901	0.994316	1.02041	1.0203	1.02583	1.02665	0.990446	0.981474	1.05159	1.07272	1.02143	0.979611	1.02511	0.997603	0.970154	1.02337	0.98334	1.05781	0.998002	0.96996	1.01197	0.994117	1.00975	1.02122	1.001	0.948949	0.986985	1	0.96358	0.997104	1.0203	0.972486	0.985112	0.980395
627	chr2	127182282	127719097	1.00662	0.950944	1.0141	1.00531	1	1.03138	1.03521	1.04865	1.04896	0.997503	0.980395	1.0026	0.998901	0.994316	1.02041	1.0203	1.02583	1.02665	0.990446	0.981474	1.05159	1.07272	1.02143	0.979611	1.02511	0.997603	0.970154	1.02337	0.98334	1.05781	0.998002	0.96996	1.01197	0.994117	1.00975	1.02122	1.001	0.948949	0.986985	1	0.96358	0.997104	1.0203	0.972486	0.985112	0.980395
628	chr2	127719098	128248568	1.00662	0.950944	1.0141	1.00531	1	1.03138	1.03521	1.04865	1.04896	0.997503	0.980395	1.0026	0.998901	0.994316	1.02041	1.0203	1.02583	1.02665	0.990446	0.981474	0.977067	1.07272	1.02143	0.979611	1.02511	0.997603	0.970154	1.02337	0.98334	1.05781	0.998002	0.96996	1.01197	0.994117	1.00975	1.02122	1.001	0.948949	0.986985	1	0.96358	0.997104	1.0203	0.972486	0.985112	0.980395
629	chr2	128248569	128804307	1.00662	0.950944	1.0141	1.00531	1	1.03138	1.03521	1.04865	1.04896	0.997503	0.980395	1.0026	0.998901	0.994316	1.02041	1.0203	1.02583	1.02665	0.990446	0.981474	0.977067	1.07272	1.02143	0.979611	1.02511	0.997603	0.970154	1.02337	0.98334	1.05781	0.998002	0.96996	1.01197	0.994117	1.00975	1.02122	1.001	0.948949	0.986985	1	0.96358	0.997104	1.0203	0.972486	0.985112	0.980395
630	chr2	128804308	129334972	1.00662	0.950944	1.0141	1.00531	1	1.03138	1.03521	1.04865	1.04896	0.997503	0.980395	1.0026	0.998901	0.994316	1.02041	1.0203	1.02583	1.02665	0.990446	0.981474	0.977067	1.07272	1.02143	0.979611	1.02511	0.997603	0.970154	1.02337	0.98334	1.05781	0.998002	0.96996	1.01197	0.994117	1.00975	1.02122	1.001	0.948949	0.986985	1	0.96358	0.997104	1.0203	0.972486	0.985112	0.980395
631	chr2	129334973	129893529	1.00662	0.950944	1.0141	1.00531	1	1.03138	1.03521	1.04865	1.04896	0.997503	0.980395	1.0026	0.998901	0.994316	1.02041	1.0203	1.02583	1.02665	0.990446	0.981474	0.977067	1.07272	1.02143	0.979611	1.02511	0.997603	0.970154	1.02337	0.98334	1.05781	0.998002	0.96996	1.01197	0.994117	1.00975	1.02122	1.001	0.948949	0.986985	1	0.96358	0.997104	1.0203	0.972486	0.985112	0.980395
632	chr2	129893530	130489798	1.00662	0.950944	1.0141	1.00531	1	1.03138	1.03521	1.04865	1.04896	0.997503	0.980395	1.0026	0.998901	0.994316	1.02041	1.0203	1.02583	1.02665	0.990446	0.981474	0.977067	1.07272	1.02143	0.979611	1.02511	0.997603	0.970154	1.02337	0.98334	1.05781	0.998002	0.96996	1.01197	0.994117	1.00975	1.02122	1.001	0.948949	0.986985	1	0.96358	0.997104	1.0203	0.972486	0.985112	0.980395
633	chr2	130489799	131034968	1.00662	0.950944	1.0141	1.00531	1	1.03138	1.03521	1.04865	1.04896	0.997503	0.980395	1.0026	0.998901	0.994316	1.02041	1.0203	1.02583	1.02665	0.990446	0.981474	0.977067	1.07272	1.02143	0.979611	1.02511	0.997603	0.970154	1.02337	0.98334	1.05781	0.998002	0.96996	1.01197	0.994117	1.00975	1.02122	1.001	0.948949	0.986985	1	0.96358	0.997104	1.0203	0.972486	0.985112	0.980395
634	chr2	131034969	131489969	1.00662	0.950944	1.0141	1.00531	1	1.03138	1.03521	1.04865	1.04896	0.997503	0.980395	1.0026	0.998901	0.994316	1.02041	1.0203	1.02583	1.02665	0.990446	0.981474	0.977067	1.07272	1.02143	0.979611	1.02511	0.997603	0.970154	1.02337	0.98334	1.05781	0.998002	0.96996	1.01197	0.994117	1.00975	1.02122	1.001	0.948949	0.986985	1	0.96358	0.997104	1.0203	0.972486	0.985112	0.980395
635	chr2	131489970	132045389	1.00662	0.950944	1.0141	1.00531	1	1.03138	1.03521	1.04865	1.04896	0.997503	0.980395	1.0026	0.998901	0.994316	1.02041	1.0203	1.02583	1.02665	0.990446	0.981474	0.977067	1.07272	1.02143	0.979611	1.02511	0.997603	0.970154	1.02337	0.98334	1.05781	0.998002	0.96996	1.01197	0.994117	1.00975	1.02122	1.001	0.948949	0.986985	1	0.96358	0.997104	1.0203	0.972486	0.985112	0.980395
636	chr2	132045390	132624565	1.00662	0.950944	1.0141	1.00531	1	1.03138	1.03521	1.04865	1.04896	0.997503	0.980395	1.0026	0.998901	0.994316	1.02041	1.0203	1.02583	1.02665	0.990446	0.981474	0.977067	1.07272	1.02143	0.979611	1.02511	0.997603	0.970154	1.02337	0.98334	1.05781	0.998002	0.96996	1.01197	0.994117	1.00975	1.02122	1.001	0.948949	0.986985	1	0.96358	0.997104	1.0203	0.972486	0.985112	0.980395
637	chr2	132624566	133106652	1.00662	0.950944	1.0141	1.00531	1	1.03138	1.03521	1.04865	1.04896	0.997503	0.980395	1.0026	0.998901	0.994316	1.02041	1.0203	1.02583	1.02665	0.990446	0.981474	0.977067	1.07272	1.02143	0.979611	1.02511	0.997603	0.970154	1.02337	0.98334	1.05781	0.998002	0.96996	1.01197	0.994117	1.00975	1.02122	1.001	0.948949	0.986985	1	0.96358	0.997104	1.0203	0.972486	0.985112	0.980395
638	chr2	133106653	133646729	1.00662	0.950944	1.0141	1.00531	1	1.03138	1.03521	1.04865	1.04896	0.997503	0.980395	1.0026	0.998901	0.994316	1.02041	1.0203	1.02583	1.02665	0.990446	0.981474	0.977067	1.07272	1.02143	0.979611	1.02511	0.997603	0.970154	1.02337	0.98334	1.05781	0.998002	0.96996	1.01197	0.994117	1.00975	1.02122	1.001	0.948949	0.986985	1	0.96358	0.997104	1.0203	0.972486	0.985112	0.980395
639	chr2	133646730	134222441	1.00662	0.950944	1.0141	1.00531	1	1.03138	1.03521	1.04865	1.04896	0.997503	0.980395	1.0026	0.998901	0.994316	1.02041	1.0203	1.02583	1.02665	0.990446	0.981474	0.977067	1.07272	1.02143	0.979611	1.02511	0.997603	0.970154	1.02337	0.98334	1.05781	0.998002	0.96996	1.01197	0.994117	1.00975	1.02122	1.001	0.948949	0.986985	1	0.96358	0.997104	1.0203	0.972486	0.985112	0.980395
640	chr2	134222442	134764646	1.00662	0.950944	1.0141	1.00531	1	1.03138	1.03521	1.04865	1.04896	0.997503	0.980395	1.0026	0.998901	0.994316	1.02041	1.0203	1.02583	1.02665	0.990446	0.981474	0.977067	1.07272	1.02143	0.979611	1.02511	0.997603	0.970154	1.02337	0.98334	1.05781	0.998002	0.96996	1.01197	0.994117	1.00975	1.02122	1.001	0.948949	0.986985	1	0.96358	0.997104	1.0203	0.972486	0.985112	0.980395
641	chr2	134764647	135304965	1.00662	0.950944	1.0141	1.00531	1	1.03138	1.03521	1.04865	1.04896	0.997503	0.980395	1.0026	0.998901	0.994316	1.02041	1.0203	1.02583	1.02665	0.990446	0.981474	0.977067	1.07272	1.02143	0.979611	1.02511	0.997603	0.970154	1.02337	0.98334	1.05781	0.998002	0.96996	1.01197	0.994117	1.00975	1.02122	1.001	0.948949	0.986985	1	0.96358	0.997104	1.0203	0.972486	0.985112	0.980395
642	chr2	135304966	135899815	1.00662	0.950944	1.0141	1.00531	1	1.03138	1.03521	1.04865	1.04896	0.997503	0.980395	1.0026	0.998901	0.994316	1.02041	1.0203	1.02583	1.02665	0.990446	0.981474	0.977067	1.07272	1.02143	0.979611	1.02511	0.997603	0.970154	1.02337	0.98334	1.05781	0.998002	0.96996	1.01197	0.994117	1.00975	1.02122	1.001	0.948949	0.986985	1	0.96358	0.997104	1.0203	0.972486	0.985112	0.980395
643	chr2	135899816	136522587	1.00662	0.480994	1.0141	1.00531	1	1.03138	1.03521	1.04865	1.04896	0.997503	0.980395	1.0026	0.998901	0.994316	1.02041	1.0203	1.02583	1.02665	0.990446	0.981474	0.977067	1.07272	1.02143	0.979611	1.02511	0.997603	0.970154	1.02337	0.98334	1.05781	0.998002	0.96996	1.01197	0.994117	1.00975	1.02122	1.001	0.948949	0.986985	1	0.96358	0.997104	1.0203	0.972486	0.985112	0.980395
644	chr2	136522588	137080316	1.00662	0.480994	1.0141	1.00531	1	1.03138	1.03521	1.04865	1.04896	0.997503	0.980395	1.0026	0.998901	0.994316	1.02041	1.0203	1.02583	1.02665	0.990446	0.981474	0.977067	1.07272	1.02143	0.979611	1.02511	0.997603	0.970154	1.02337	0.98334	1.05781	0.998002	0.96996	1.01197	0.994117	1.00975	1.02122	1.001	0.948949	0.986985	1	0.96358	0.997104	1.0203	0.972486	0.985112	0.980395
645	chr2	137080317	137659284	1.00662	0.480994	1.0141	1.00531	1	1.03138	1.03521	1.04865	1.04896	0.997503	0.980395	1.0026	0.998901	0.994316	1.02041	1.0203	1.02583	1.02665	0.990446	0.981474	0.977067	1.07272	1.02143	0.979611	1.02511	0.997603	0.970154	1.02337	0.98334	1.05781	0.998002	0.96996	1.01197	0.994117	1.00975	1.02122	1.001	0.948949	0.986985	1	0.96358	0.997104	1.0203	0.972486	0.985112	0.980395
646	chr2	137659285	138290205	1.00662	0.480994	1.0141	1.00531	1	1.03138	1.03521	1.04865	1.04896	0.997503	0.980395	1.0026	0.998901	0.994316	1.02041	1.0203	1.02583	1.02665	0.990446	0.981474	0.977067	1.07272	1.02143	0.979611	1.02511	0.997603	0.970154	1.02337	0.98334	1.05781	0.998002	0.96996	1.01197	0.994117	1.00975	1.02122	1.001	0.948949	0.986985	1	0.96358	0.997104	1.0203	0.972486	0.985112	0.980395
647	chr2	138290206	138899521	1.00662	0.480994	1.0141	1.00531	1	1.03138	1.03521	1.04865	1.04896	0.997503	0.980395	1.0026	0.998901	0.994316	1.02041	1.0203	1.02583	1.02665	0.990446	0.981474	0.977067	1.07272	1.02143	0.979611	1.02511	0.997603	0.970154	1.02337	0.98334	1.05781	0.998002	0.96996	1.01197	0.994117	1.00975	1.02122	1.001	0.948949	0.986985	1	0.96358	0.997104	1.0203	0.972486	0.985112	0.980395
648	chr2	138899522	139500158	1.00662	0.480994	1.0141	1.00531	1	1.03138	1.03521	1.04865	1.04896	0.997503	0.980395	1.0026	0.998901	0.994316	1.02041	1.0203	1.02583	1.02665	0.990446	0.981474	0.977067	1.07272	1.02143	0.979611	1.02511	0.997603	0.970154	1.02337	0.98334	1.05781	0.998002	0.96996	1.01197	0.994117	1.00975	1.02122	1.001	0.948949	0.986985	1	0.96358	0.997104	1.0203	0.972486	0.985112	0.980395
649	chr2	139500159	140135867	1.00662	0.480994	1.0141	1.00531	1	1.03138	1.03521	1.04865	1.04896	0.997503	0.980395	1.0026	0.998901	0.994316	1.02041	1.0203	1.02583	1.02665	0.990446	0.981474	0.977067	1.07272	1.02143	0.979611	1.02511	0.997603	0.970154	1.02337	0.98334	1.05781	0.998002	0.96996	1.01197	0.994117	1.00975	1.02122	1.001	0.948949	0.986985	1	0.96358	0.997104	1.0203	0.972486	0.985112	0.980395
650	chr2	140135868	140785949	1.00662	0.480994	1.0141	1.00531	1	1.03138	1.03521	1.04865	1.04896	0.997503	0.980395	1.0026	0.998901	0.994316	1.02041	1.0203	1.02583	1.02665	0.990446	0.981474	0.977067	1.07272	1.02143	0.979611	1.02511	0.997603	0.970154	1.02337	0.98334	1.05781	0.998002	0.96996	1.01197	0.994117	1.00975	1.02122	1.001	0.948949	0.986985	1	0.96358	0.997104	1.0203	0.972486	0.985112	0.980395
651	chr2	140785950	141440323	1.00662	0.997104	1.0141	1.00531	1	1.03138	1.03521	1.04865	1.04896	0.997503	0.980395	1.0026	0.998901	0.994316	1.02041	1.0203	1.02583	1.02665	0.990446	0.981474	0.977067	1.07272	1.02143	0.979611	1.02511	0.997603	0.970154	1.02337	0.98334	1.05781	0.998002	0.96996	1.01197	0.994117	1.00975	1.02122	1.001	0.948949	0.986985	1	0.96358	0.997104	1.0203	0.972486	0.985112	0.980395
652	chr2	141440324	142108722	1.00662	0.997104	1.0141	1.00531	1	1.03138	1.03521	1.04865	1.04896	0.997503	0.980395	1.0026	0.998901	0.994316	1.02041	1.0203	1.02583	1.02665	0.990446	0.981474	0.977067	1.07272	1.02143	0.979611	1.02511	0.997603	0.970154	1.02337	0.98334	1.05781	0.998002	0.96996	1.01197	0.994117	1.00975	1.02122	1.001	0.948949	0.986985	1	0.96358	0.997104	1.0203	0.972486	0.985112	0.980395
653	chr2	142108723	142764688	1.00662	0.997104	1.0141	1.00531	1	1.03138	1.03521	1.04865	1.04896	0.997503	0.980395	1.0026	0.998901	0.994316	1.02041	1.0203	1.02583	1.02665	0.990446	0.981474	0.977067	1.07272	1.02143	0.979611	1.02511	0.997603	0.970154	1.02337	0.98334	1.05781	0.998002	0.96996	1.01197	0.994117	1.00975	1.02122	1.001	0.948949	0.986985	1	0.96358	0.997104	1.0203	0.972486	0.985112	0.980395
654	chr2	142764689	143423926	1.00662	0.997104	1.0141	1.00531	1	1.03138	1.03521	1.04865	1.04896	0.997503	0.980395	1.0026	0.998901	0.994316	1.02041	1.0203	1.02583	1.02665	0.990446	0.981474	0.977067	1.07272	1.02143	0.979611	1.02511	0.997603	0.970154	1.02337	0.98334	1.05781	0.998002	0.96996	1.01197	0.994117	1.00975	1.02122	1.001	0.948949	0.986985	1	0.96358	0.997104	1.0203	0.972486	0.985112	0.980395
655	chr2	143423927	144043797	1.00662	0.997104	1.0141	1.00531	1	1.03138	1.03521	1.04865	1.04896	0.997503	0.980395	1.0026	0.998901	0.994316	1.02041	1.0203	1.02583	1.02665	0.990446	0.981474	0.977067	1.07272	1.02143	0.979611	1.02511	0.997603	0.970154	1.02337	0.98334	1.05781	0.998002	0.96996	1.01197	0.994117	1.00975	1.02122	1.001	0.948949	0.986985	1	0.96358	0.997104	1.0203	0.972486	0.985112	0.980395
656	chr2	144043798	144599655	1.00662	0.997104	1.0141	1.00531	1	1.03138	1.03521	1.04865	1.04896	0.997503	0.980395	1.0026	0.998901	0.994316	1.02041	1.0203	1.02583	1.02665	0.990446	0.981474	0.977067	1.07272	1.02143	0.979611	1.02511	0.997603	0.970154	1.02337	0.98334	1.05781	0.998002	0.96996	1.01197	0.994117	1.00975	1.02122	1.001	0.948949	0.986985	1	0.96358	0.997104	1.0203	0.972486	0.985112	0.980395
657	chr2	144599656	145185520	1.00662	0.997104	1.0141	1.00531	1	1.03138	1.03521	1.04865	1.04896	0.997503	0.980395	1.0026	0.998901	0.994316	1.02041	1.0203	1.02583	1.02665	0.990446	0.981474	0.977067	1.07272	1.02143	0.979611	1.02511	0.997603	0.970154	1.02337	0.98334	1.05781	0.998002	0.96996	1.01197	0.994117	1.00975	1.02122	1.001	0.948949	0.986985	1	0.96358	0.997104	1.0203	0.972486	0.985112	0.980395
658	chr2	145185521	145739007	1.00662	0.997104	1.0141	1.00531	1	1.03138	1.03521	1.04865	1.04896	0.997503	0.980395	1.0026	0.998901	0.994316	1.02041	1.0203	1.02583	1.02665	0.990446	0.981474	0.977067	1.07272	1.02143	0.979611	1.02511	0.997603	0.970154	1.02337	0.98334	1.05781	0.998002	0.96996	1.01197	0.994117	1.00975	1.02122	1.001	0.948949	0.986985	1	0.96358	0.997104	1.0203	0.972486	0.985112	0.980395
659	chr2	145739008	146313042	1.00662	0.997104	1.0141	1.00531	1	1.03138	1.03521	1.04865	1.04896	0.997503	0.980395	1.0026	0.355226	0.994316	1.02041	1.0203	1.02583	1.02665	0.990446	0.981474	0.977067	1.07272	1.02143	0.979611	1.02511	0.997603	0.970154	1.02337	0.98334	1.05781	0.998002	0.96996	1.01197	0.994117	1.00975	1.02122	1.001	0.948949	0.986985	1	0.96358	0.997104	1.0203	0.972486	0.985112	0.980395
660	chr2	146313043	146935779	1.00662	0.997104	1.0141	1.00531	1	1.03138	1.03521	1.04865	1.04896	0.997503	0.980395	1.0026	0.355226	0.994316	1.02041	1.0203	1.02583	1.02665	0.990446	0.981474	0.977067	1.07272	1.02143	0.979611	1.02511	0.997603	0.970154	1.02337	0.98334	1.05781	0.998002	0.96996	1.01197	0.994117	1.00975	1.02122	1.001	0.948949	0.986985	1	0.96358	0.997104	1.0203	0.972486	0.985112	0.980395
661	chr2	146935780	147576202	1.00662	0.997104	1.0141	1.00531	1	1.03138	1.03521	1.04865	1.04896	0.997503	0.980395	1.0026	1.07853	0.994316	1.02041	1.0203	1.02583	1.02665	0.990446	0.981474	0.977067	1.07272	1.02143	0.979611	1.02511	0.997603	0.970154	1.02337	0.98334	1.05781	0.998002	0.96996	1.01197	0.994117	1.00975	1.02122	1.001	0.948949	0.986985	1	0.96358	0.997104	1.0203	0.972486	0.985112	0.980395
662	chr2	147576203	148177701	1.00662	0.997104	1.0141	1.00531	1	1.03138	1.03521	1.04865	1.04896	0.997503	0.980395	1.0026	1.07853	0.994316	1.02041	1.0203	1.02583	1.02665	0.990446	0.981474	0.977067	1.07272	1.02143	0.979611	1.02511	0.997603	0.970154	1.02337	0.98334	1.05781	0.998002	0.96996	1.01197	0.994117	1.00975	1.02122	1.001	0.948949	0.986985	1	0.96358	0.997104	1.0203	0.972486	0.985112	0.980395
663	chr2	148177702	148767873	1.00662	0.997104	1.0141	1.00531	1	1.03138	1.03521	1.04865	1.04896	0.997503	0.980395	1.0026	1.07853	0.994316	1.02041	1.0203	1.02583	1.02665	0.990446	0.981474	0.977067	1.07272	1.02143	0.979611	1.02511	0.997603	0.970154	1.02337	0.98334	1.05781	0.998002	0.96996	1.01197	0.994117	1.00975	1.02122	1.001	0.948949	0.986985	1	0.96358	0.997104	1.0203	0.972486	0.985112	0.980395
664	chr2	148767874	149395999	1.00662	0.997104	1.0141	1.00531	1	1.03138	1.03521	1.04865	1.04896	0.997503	0.980395	1.0026	1.07853	0.994316	1.02041	1.0203	1.02583	1.02665	0.990446	0.981474	0.977067	1.07272	1.02143	0.979611	1.02511	0.997603	0.970154	1.02337	0.98334	1.05781	0.998002	0.96996	1.01197	0.994117	1.00975	1.02122	1.001	0.948949	0.986985	1	0.96358	0.997104	1.0203	0.972486	0.985112	0.980395
665	chr2	149396000	150051142	1.00662	0.997104	1.0141	1.00531	1	1.03138	1.03521	1.04865	1.04896	0.997503	0.980395	1.0026	1.07853	0.994316	1.02041	1.0203	1.02583	1.02665	0.990446	0.981474	0.977067	1.07272	1.02143	0.979611	1.02511	0.997603	0.970154	1.02337	0.98334	1.05781	0.998002	0.96996	1.01197	0.994117	1.00975	1.02122	1.001	0.948949	0.986985	1	0.96358	0.997104	1.0203	0.972486	0.985112	0.980395
666	chr2	150051143	150624089	1.00662	0.997104	1.0141	1.00531	1	1.03138	1.03521	1.04865	1.04896	0.997503	0.980395	1.0026	1.07853	0.994316	1.02041	1.0203	1.02583	1.02665	0.990446	0.981474	0.977067	1.07272	1.02143	0.979611	1.02511	0.997603	0.970154	1.02337	0.98334	1.05781	0.998002	0.96996	1.01197	0.994117	1.00975	1.02122	1.001	0.948949	0.986985	1	0.96358	0.997104	1.0203	0.972486	0.985112	0.980395
667	chr2	150624090	151226361	1.00662	0.997104	1.0141	1.00531	1	1.03138	1.03521	1.04865	1.04896	0.997503	0.980395	1.0026	1.07853	0.994316	1.02041	1.0203	1.02583	1.02665	0.990446	0.981474	0.977067	1.07272	1.02143	0.979611	1.02511	0.997603	0.970154	1.02337	0.98334	1.05781	0.998002	0.96996	1.01197	0.994117	1.00975	1.02122	1.001	0.948949	0.986985	1	0.96358	0.997104	1.0203	0.972486	0.985112	0.980395
668	chr2	151226362	151773493	1.00662	0.997104	1.0141	1.00531	1	1.03138	1.03521	1.04865	1.04896	0.997503	0.980395	1.0026	1.07853	0.994316	1.02041	1.0203	1.02583	1.02665	0.990446	0.981474	0.977067	1.07272	1.02143	0.979611	1.02511	0.997603	0.970154	1.02337	0.98334	1.05781	0.998002	0.96996	1.01197	0.994117	1.00975	1.02122	1.001	0.948949	0.986985	1	0.96358	0.997104	1.0203	0.972486	0.985112	0.980395
669	chr2	151773494	152351712	1.00662	0.997104	1.0141	1.00531	1	1.03138	1.03521	1.04865	1.04896	0.997503	0.980395	1.0026	1.07853	0.994316	1.02041	1.0203	1.02583	1.02665	0.990446	0.981474	0.977067	1.07272	1.02143	0.979611	1.02511	0.997603	0.970154	1.02337	0.98334	1.05781	0.998002	0.96996	1.01197	0.994117	1.00975	1.02122	1.001	0.948949	0.986985	1	0.96358	0.997104	1.0203	0.972486	0.985112	0.980395
670	chr2	152351713	152904898	1.00662	0.997104	1.0141	1.00531	1	1.03138	1.03521	1.04865	1.04896	0.997503	0.980395	1.0026	1.07853	0.994316	1.02041	1.0203	1.02583	1.02665	0.990446	0.981474	0.977067	1.07272	1.02143	0.979611	1.02511	0.997603	0.970154	1.02337	0.98334	1.05781	0.998002	0.96996	1.01197	0.994117	1.00975	1.02122	1.001	0.948949	0.986985	1	0.96358	0.997104	1.0203	0.972486	0.985112	0.980395
671	chr2	152904899	153459618	1.00662	0.997104	1.0141	1.00531	1	1.03138	1.03521	1.04865	1.04896	0.997503	0.980395	1.0026	1.07853	0.994316	1.02041	1.0203	1.02583	1.02665	0.990446	0.981474	0.977067	1.07272	1.02143	0.979611	1.02511	0.997603	0.970154	1.02337	0.98334	1.05781	0.998002	0.96996	1.01197	0.994117	1.00975	1.02122	1.001	0.948949	0.986985	1	0.96358	0.997104	1.0203	0.972486	0.985112	0.980395
672	chr2	153459619	154054749	1.00662	0.997104	1.0141	1.00531	1	1.03138	1.03521	1.04865	1.04896	0.997503	0.980395	1.0026	1.07853	0.994316	1.02041	1.0203	1.02583	1.02665	0.990446	0.981474	0.977067	1.07272	1.02143	0.979611	1.02511	0.997603	0.970154	1.02337	0.98334	1.05781	0.998002	0.96996	1.01197	0.994117	1.00975	1.02122	1.001	0.948949	0.986985	1	0.96358	0.997104	1.0203	0.972486	0.985112	0.980395
673	chr2	154054750	154696884	1.00662	0.997104	1.0141	1.00531	1	1.03138	1.03521	1.04865	1.04896	0.997503	0.980395	1.0026	1.07853	0.994316	1.02041	1.0203	1.02583	1.02665	0.990446	0.981474	0.977067	1.07272	1.02143	0.979611	1.02511	0.997603	0.970154	1.02337	0.98334	1.05781	0.998002	0.96996	1.01197	0.994117	1.00975	1.02122	1.001	0.948949	0.986985	1	0.96358	0.997104	1.0203	0.972486	0.985112	0.980395
674	chr2	154696885	155350732	1.00662	0.997104	1.0141	1.00531	1	1.03138	1.03521	1.04865	1.04896	0.997503	0.980395	1.0026	1.07853	0.994316	1.02041	1.0203	1.02583	1.02665	0.990446	0.981474	0.977067	1.07272	1.02143	0.979611	1.02511	0.997603	0.970154	1.02337	0.98334	1.05781	0.998002	0.96996	1.01197	0.994117	1.00975	1.02122	1.001	0.948949	0.986985	1	0.96358	0.997104	1.0203	0.972486	0.985112	0.980395
675	chr2	155350733	156010048	1.00662	0.997104	1.0141	1.00531	1	1.03138	1.03521	1.04865	1.04896	0.997503	0.980395	1.0026	1.07853	0.994316	1.02041	1.0203	1.02583	1.02665	0.990446	0.981474	0.977067	1.07272	1.02143	0.979611	1.02511	0.997603	0.970154	1.02337	0.98334	1.05781	0.998002	0.96996	1.01197	0.994117	1.00975	1.02122	1.001	0.948949	0.986985	1	0.96358	0.997104	1.0203	0.972486	0.985112	0.980395
676	chr2	156010049	156677526	1.00662	0.997104	1.0141	1.00531	1	1.03138	1.03521	1.04865	1.04896	0.997503	0.980395	1.0026	1.07853	0.994316	1.02041	1.0203	1.02583	1.02665	0.990446	0.981474	0.977067	1.07272	1.02143	0.979611	1.02511	0.997603	0.970154	1.02337	0.98334	1.05781	0.998002	0.96996	1.01197	0.994117	1.00975	1.02122	1.001	0.948949	0.986985	1	0.96358	0.997104	1.0203	0.972486	0.985112	0.980395
677	chr2	156677527	157291932	1.00662	0.997104	1.0141	1.00531	1	1.03138	1.03521	1.04865	1.04896	0.997503	0.980395	1.0026	1.07853	0.994316	1.02041	1.0203	1.02583	1.02665	0.990446	0.981474	0.977067	1.07272	1.02143	0.979611	1.02511	0.997603	0.970154	1.02337	0.98334	1.05781	0.998002	0.96996	1.01197	0.994117	1.00975	1.02122	1.001	0.948949	0.986985	1	0.96358	0.997104	1.0203	0.972486	0.985112	0.980395
678	chr2	157291933	157906405	1.00662	0.997104	1.0141	1.00531	1	1.03138	1.03521	1.04865	1.04896	0.997503	0.980395	1.0026	1.07853	0.994316	1.02041	1.0203	1.02583	1.02665	0.990446	0.981474	0.977067	1.07272	1.02143	0.979611	1.02511	0.997603	0.970154	1.02337	0.98334	1.05781	0.998002	0.96996	1.01197	0.994117	1.00975	1.02122	1.001	0.948949	0.986985	1	0.96358	0.997104	1.0203	0.972486	0.985112	0.980395
679	chr2	157906406	158508422	1.00662	0.997104	1.0141	1.00531	1	1.03138	1.03521	1.04865	1.04896	0.997503	0.980395	1.0026	1.07853	0.994316	1.02041	1.0203	1.02583	1.02665	0.990446	0.981474	0.977067	1.07272	1.02143	0.979611	1.02511	0.997603	0.970154	1.02337	0.98334	1.05781	0.998002	0.96996	1.01197	0.994117	1.00975	1.02122	1.001	0.948949	0.986985	1	0.96358	0.997104	1.0203	0.972486	0.985112	0.980395
680	chr2	158508423	159062860	1.00662	0.997104	1.0141	1.00531	1	1.03138	1.03521	1.04865	1.04896	0.997503	0.980395	1.0026	1.07853	0.994316	1.02041	1.0203	1.02583	1.02665	0.990446	0.981474	0.977067	1.07272	1.02143	0.979611	1.02511	0.997603	0.970154	1.02337	0.98334	1.05781	0.998002	0.96996	1.01197	0.994117	1.00975	1.02122	1.001	0.948949	0.986985	1	0.96358	0.997104	1.0203	0.972486	0.985112	0.980395
681	chr2	159062861	159642040	1.00662	0.997104	1.0141	1.00531	1	1.03138	1.03521	1.04865	1.04896	0.997503	0.980395	1.0026	1.07853	0.994316	1.02041	1.0203	1.02583	1.02665	0.990446	0.981474	0.977067	1.07272	1.02143	0.979611	1.02511	0.997603	0.970154	1.02337	0.98334	1.05781	0.998002	0.96996	1.01197	0.994117	1.00975	1.02122	1.001	0.948949	0.986985	1	0.96358	0.997104	1.0203	0.972486	0.985112	0.980395
682	chr2	159642041	160199310	1.00662	0.997104	1.0141	1.00531	1	1.03138	1.03521	1.04865	1.04896	0.997503	0.980395	1.0026	1.07853	0.994316	1.02041	1.0203	1.02583	1.02665	0.990446	0.981474	0.977067	1.07272	1.02143	0.979611	1.02511	0.997603	0.970154	1.02337	0.98334	1.05781	0.998002	0.96996	1.01197	0.994117	1.00975	1.02122	1.001	0.948949	0.986985	1	0.96358	0.997104	1.0203	0.972486	0.985112	0.980395
683	chr2	160199311	160824850	1.00662	0.997104	1.0141	1.00531	1	1.03138	1.03521	1.04865	1.04896	0.997503	0.980395	1.0026	1.07853	0.994316	1.02041	1.0203	1.02583	1.02665	0.990446	0.981474	0.977067	1.07272	1.02143	0.979611	1.02511	0.997603	0.970154	1.02337	0.98334	1.05781	0.998002	0.96996	1.01197	0.994117	1.00975	1.02122	1.001	0.948949	0.986985	1	0.96358	0.997104	1.0203	0.972486	0.985112	0.980395
684	chr2	160824851	161369693	1.00662	0.997104	1.0141	1.00531	1	1.03138	1.03521	1.04865	1.04896	0.997503	0.980395	1.0026	1.07853	0.994316	1.02041	1.0203	1.02583	1.02665	0.990446	0.981474	0.977067	1.07272	1.02143	0.979611	1.02511	0.997603	0.970154	1.02337	0.98334	1.05781	0.998002	0.96996	1.01197	0.994117	1.00975	1.02122	1.001	0.948949	0.986985	1	0.96358	0.997104	1.0203	0.972486	0.985112	0.980395
685	chr2	161369694	161948721	1.00662	0.997104	1.0141	1.00531	1	1.03138	1.03521	1.04865	1.04896	0.997503	0.980395	1.0026	1.07853	0.994316	1.02041	1.0203	1.02583	1.02665	0.990446	0.981474	0.977067	1.07272	1.02143	0.979611	1.02511	0.997603	0.970154	1.02337	0.98334	1.05781	0.998002	0.96996	1.01197	0.994117	1.00975	1.02122	1.001	0.948949	0.986985	1	0.96358	0.997104	1.0203	0.972486	0.985112	0.980395
686	chr2	161948722	162533747	1.00662	0.997104	1.0141	1.00531	1	1.03138	1.03521	1.04865	1.04896	0.997503	0.980395	1.0026	1.07853	0.994316	1.02041	1.0203	1.02583	1.02665	0.990446	0.981474	0.977067	1.07272	1.02143	0.979611	1.02511	0.997603	0.970154	1.02337	0.98334	1.05781	0.998002	0.96996	1.01197	0.994117	1.00975	1.02122	1.001	0.948949	0.986985	1	0.96358	0.997104	1.0203	0.972486	0.985112	0.980395
687	chr2	162533748	163121885	1.00662	0.997104	1.0141	1.00531	1	1.03138	1.03521	1.04865	1.04896	0.997503	0.980395	1.0026	1.07853	0.994316	1.02041	1.0203	1.02583	1.02665	0.990446	0.981474	0.977067	1.07272	1.02143	0.979611	1.02511	0.997603	0.970154	1.02337	0.98334	1.05781	0.998002	0.96996	1.01197	0.994117	1.00975	1.02122	1.001	0.948949	0.986985	1	0.96358	0.997104	1.0203	0.972486	0.985112	0.980395
688	chr2	163121886	163720133	1.00662	0.997104	1.0141	1.00531	1	1.03138	1.03521	1.04865	1.04896	0.997503	0.980395	1.0026	1.07853	0.994316	1.02041	1.0203	1.02583	1.02665	0.990446	0.981474	0.977067	1.07272	1.02143	0.979611	1.02511	0.997603	0.970154	1.02337	0.98334	1.05781	0.998002	0.96996	1.01197	0.994117	1.00975	1.02122	1.001	0.948949	0.986985	1	0.96358	0.997104	1.0203	0.972486	0.985112	0.980395
689	chr2	163720134	164318683	1.00662	0.997104	1.0141	1.00531	1	1.03138	1.03521	1.04865	1.04896	0.997503	0.980395	1.0026	1.07853	0.994316	1.02041	1.0203	1.02583	1.02665	0.990446	0.981474	0.977067	1.07272	1.02143	0.979611	1.02511	0.997603	0.970154	1.02337	0.98334	1.05781	0.998002	0.96996	1.01197	0.994117	1.00975	1.02122	1.001	0.948949	0.986985	1	0.96358	0.997104	1.0203	0.972486	0.985112	0.980395
690	chr2	164318684	164918451	1.00662	0.997104	1.0141	1.00531	1	1.03138	1.03521	1.04865	1.04896	0.997503	0.980395	1.0026	1.07853	0.994316	1.02041	1.0203	1.02583	1.02665	0.990446	0.981474	0.977067	1.07272	1.02143	0.979611	1.02511	0.997603	0.970154	1.02337	0.98334	1.05781	0.998002	0.96996	1.01197	0.994117	1.00975	1.02122	1.001	0.948949	0.986985	1	0.96358	0.997104	1.0203	0.972486	0.985112	0.980395
691	chr2	164918452	165555633	1.00662	0.997104	1.0141	1.00531	1	1.03138	1.03521	1.04865	1.04896	0.997503	0.980395	1.0026	1.07853	0.994316	1.02041	1.0203	1.02583	1.02665	0.990446	0.981474	0.977067	1.07272	1.02143	0.979611	1.02511	0.997603	0.970154	1.02337	0.98334	1.05781	0.998002	0.96996	1.01197	0.994117	1.00975	1.02122	1.001	0.948949	0.986985	1	0.96358	0.997104	1.0203	0.972486	0.985112	0.980395
692	chr2	165555634	166160355	1.00662	0.997104	1.0141	1.00531	1	1.03138	1.03521	1.04865	1.04896	0.997503	0.980395	1.0026	1.07853	0.994316	1.02041	1.0203	1.02583	1.02665	0.990446	0.981474	0.977067	1.07272	1.02143	0.979611	1.02511	0.997603	0.970154	1.02337	0.98334	1.05781	0.998002	0.96996	1.01197	0.994117	1.00975	1.02122	1.001	0.948949	0.986985	1	0.96358	0.997104	1.0203	0.972486	0.985112	0.980395
693	chr2	166160356	166760960	1.00662	0.997104	1.0141	1.00531	1	1.03138	1.03521	1.04865	1.04896	0.997503	0.980395	1.0026	1.07853	0.994316	1.02041	1.0203	1.02583	1.02665	0.990446	0.981474	0.977067	1.07272	1.02143	0.979611	1.02511	0.997603	0.970154	1.02337	0.98334	1.05781	0.998002	0.96996	1.01197	0.994117	1.00975	1.02122	1.001	0.948949	0.986985	1	0.96358	0.997104	1.0203	0.972486	0.985112	0.980395
694	chr2	166760961	167384385	1.00662	0.997104	1.0141	1.00531	1	1.03138	1.03521	1.04865	1.04896	0.997503	0.980395	1.0026	1.07853	0.994316	1.02041	1.0203	1.02583	1.02665	0.990446	0.981474	0.977067	1.07272	1.02143	0.979611	1.02511	0.997603	0.970154	1.02337	0.98334	1.05781	0.998002	0.96996	1.01197	0.994117	1.00975	1.02122	1.001	0.948949	0.986985	1	0.96358	0.997104	1.0203	0.972486	0.985112	0.980395
695	chr2	167384386	168043138	1.00662	0.997104	1.0141	1.00531	1	1.03138	1.03521	1.04865	1.04896	0.997503	0.980395	1.0026	1.07853	0.994316	1.02041	1.0203	1.02583	1.02665	0.990446	0.981474	0.977067	1.07272	1.02143	0.979611	1.02511	0.997603	0.970154	1.02337	0.98334	1.05781	0.998002	0.96996	1.01197	0.994117	1.00975	1.02122	1.001	0.948949	0.986985	1	0.96358	0.997104	1.0203	0.972486	0.985112	0.980395
696	chr2	168043139	168676549	1.00662	0.997104	1.0141	1.00531	1	1.03138	1.03521	1.04865	1.04896	0.997503	0.980395	1.0026	1.07853	0.994316	1.02041	1.0203	1.02583	1.02665	0.990446	0.981474	0.977067	1.07272	1.02143	0.979611	1.02511	0.997603	0.970154	1.02337	0.98334	1.05781	0.998002	0.96996	1.01197	0.994117	1.00975	1.02122	1.001	0.948949	0.986985	1	0.96358	0.997104	1.0203	0.972486	0.985112	0.980395
697	chr2	168676550	169245870	1.00662	0.997104	1.0141	1.00531	1	1.03138	1.03521	1.04865	1.04896	0.997503	0.980395	1.0026	1.07853	0.994316	1.02041	1.0203	1.02583	1.02665	0.990446	0.981474	0.977067	1.07272	1.02143	0.979611	1.02511	0.997603	0.970154	1.02337	0.98334	1.05781	0.998002	0.96996	1.01197	0.994117	1.00975	1.02122	1.001	0.948949	0.986985	1	0.96358	0.997104	1.0203	0.972486	0.985112	0.980395
698	chr2	169245871	169827795	1.00662	0.997104	1.0141	1.00531	1	1.03138	1.03521	1.04865	1.04896	0.997503	0.980395	1.0026	1.07853	0.994316	1.02041	1.0203	1.02583	1.02665	0.990446	0.981474	0.977067	1.07272	1.02143	0.979611	1.02511	0.997603	0.970154	1.02337	0.98334	1.05781	0.998002	0.96996	1.01197	0.994117	1.00975	1.02122	1.001	0.948949	0.986985	1	0.96358	0.997104	1.0203	0.972486	0.985112	0.980395
699	chr2	169827796	170444091	1.00662	0.997104	1.0141	1.00531	1	1.03138	1.03521	1.04865	1.04896	0.997503	0.980395	1.0026	1.07853	0.994316	1.02041	1.0203	1.02583	1.02665	0.990446	0.981474	0.977067	1.07272	1.02143	0.979611	1.02511	0.997603	0.970154	1.02337	0.98334	1.05781	0.998002	0.96996	1.01197	0.994117	1.00975	1.02122	1.001	0.948949	0.986985	1	0.96358	0.997104	1.0203	0.972486	0.985112	0.980395
700	chr2	170444092	171083939	1.00662	0.997104	1.0141	1.00531	1	1.03138	1.03521	1.04865	1.04896	0.997503	0.980395	1.0026	1.07853	0.994316	1.02041	1.0203	1.02583	1.02665	0.990446	0.981474	0.977067	1.07272	1.02143	0.979611	1.02511	0.997603	0.970154	1.02337	0.98334	1.05781	0.998002	0.96996	1.01197	0.994117	1.00975	1.02122	1.001	0.948949	0.986985	1	0.96358	0.997104	1.0203	0.972486	0.985112	0.980395
701	chr2	171083940	171664143	1.00662	0.997104	1.0141	1.00531	1	1.03138	1.03521	1.04865	1.04896	0.997503	0.980395	1.0026	1.07853	0.994316	1.02041	1.0203	1.02583	1.02665	0.990446	0.981474	0.977067	1.07272	1.02143	0.979611	1.02511	0.997603	0.970154	1.02337	0.98334	1.05781	0.998002	0.96996	1.01197	0.994117	1.00975	1.02122	1.001	0.948949	0.986985	1	0.96358	0.997104	1.0203	0.972486	0.985112	0.980395
702	chr2	171664144	172256578	1.00662	0.997104	1.0141	1.00531	1	1.03138	1.03521	1.04865	1.04896	0.997503	0.980395	1.0026	0.901947	0.994316	1.02041	1.0203	1.02583	1.02665	0.990446	0.981474	0.977067	1.07272	1.02143	0.979611	1.02511	0.997603	0.970154	1.02337	0.98334	1.05781	0.998002	0.96996	1.01197	0.994117	1.00975	1.02122	1.001	0.948949	0.986985	1	0.96358	0.997104	1.0203	0.972486	0.985112	0.980395
703	chr2	172256579	172837899	1.00662	0.997104	1.0141	1.00531	1	1.03138	1.03521	1.04865	1.04896	0.997503	0.980395	1.0026	0.901947	0.994316	1.02041	1.0203	1.02583	1.02665	0.990446	0.981474	0.977067	1.07272	1.02143	0.979611	1.02511	0.997603	0.970154	1.02337	0.98334	1.05781	0.998002	0.96996	1.01197	0.994117	1.00975	1.02122	1.001	0.948949	0.986985	1	0.96358	0.997104	1.0203	0.972486	0.985112	0.980395
704	chr2	172837900	173373055	1.00662	0.997104	1.0141	1.00531	1	1.03138	1.03521	1.04865	1.04896	0.997503	0.980395	1.0026	0.901947	0.994316	1.02041	1.0203	1.02583	1.02665	0.990446	0.981474	0.977067	1.07272	1.02143	0.979611	1.02511	0.997603	0.970154	1.02337	0.98334	1.05781	0.998002	0.96996	1.01197	0.994117	1.00975	1.02122	1.001	0.948949	0.986985	1	0.96358	0.997104	1.0203	0.972486	0.985112	0.980395
705	chr2	173373056	173922524	1.00662	0.997104	1.0141	1.00531	1	1.03138	1.03521	1.04865	1.04896	0.997503	0.980395	1.0026	0.901947	0.994316	1.02041	1.0203	1.02583	1.02665	0.990446	0.981474	0.977067	1.07272	1.02143	0.979611	1.02511	0.997603	0.970154	1.02337	0.98334	1.05781	0.998002	0.96996	1.01197	0.994117	1.00975	1.02122	1.001	0.948949	0.986985	1	0.96358	0.997104	1.0203	0.972486	0.985112	0.980395
706	chr2	173922525	174488297	1.00662	0.997104	1.0141	1.00531	1	1.03138	1.03521	1.04865	1.04896	0.997503	0.980395	1.0026	0.901947	0.994316	1.02041	1.0203	1.02583	1.02665	0.990446	0.981474	0.977067	1.07272	1.02143	0.979611	1.02511	0.997603	0.970154	1.02337	0.98334	1.05781	0.998002	0.96996	1.01197	0.994117	1.00975	1.02122	1.001	0.948949	0.986985	1	0.96358	0.997104	1.0203	0.972486	0.985112	0.980395
707	chr2	174488298	175042378	1.00662	0.997104	1.0141	1.00531	1	1.03138	1.03521	1.04865	1.04896	0.997503	0.980395	1.0026	0.901947	0.994316	1.02041	1.0203	1.02583	1.02665	0.990446	0.981474	0.977067	1.07272	1.02143	0.979611	1.02511	0.997603	0.970154	1.02337	0.98334	1.05781	0.998002	0.96996	1.01197	0.994117	1.00975	1.02122	1.001	0.948949	0.986985	1	0.96358	0.997104	1.0203	0.972486	0.985112	0.980395
708	chr2	175042379	175633749	1.00662	0.997104	1.0141	1.00531	1	1.03138	1.03521	1.04865	1.04896	0.997503	0.980395	1.0026	0.901947	0.994316	1.02041	1.0203	1.02583	1.02665	0.990446	0.981474	0.977067	1.07272	1.02143	0.979611	1.02511	0.997603	0.970154	1.02337	0.98334	1.05781	0.998002	0.96996	1.01197	0.994117	1.00975	1.02122	1.001	0.948949	0.986985	1	0.96358	0.997104	1.0203	0.972486	0.985112	0.980395
709	chr2	175633750	176213231	1.00662	0.997104	1.0141	1.00531	1	1.03138	1.03521	1.04865	1.04896	0.997503	0.980395	1.0026	0.901947	0.994316	1.02041	1.0203	1.02583	1.02665	0.990446	0.981474	0.977067	1.07272	1.02143	0.979611	1.02511	0.997603	0.970154	1.02337	0.98334	1.05781	0.998002	0.96996	1.01197	0.994117	1.00975	1.02122	1.001	0.948949	0.986985	1	0.96358	0.997104	1.0203	0.972486	0.985112	0.980395
710	chr2	176213232	176781369	1.00662	0.997104	1.0141	1.00531	1	1.03138	1.03521	1.04865	1.04896	0.997503	0.980395	1.0026	0.901947	0.994316	1.02041	1.0203	1.02583	1.02665	0.990446	0.981474	0.977067	1.07272	1.02143	0.979611	1.02511	0.997603	0.970154	1.02337	0.98334	1.05781	0.998002	0.96996	1.01197	0.994117	1.00975	1.02122	1.001	0.948949	0.986985	1	0.96358	0.997104	1.0203	0.972486	0.985112	0.980395
711	chr2	176781370	177396277	1.00662	0.997104	1.0141	1.00531	1	1.03138	1.03521	1.04865	1.04896	0.997503	0.980395	1.0026	0.901947	0.994316	1.02041	1.0203	1.02583	1.02665	0.990446	0.981474	0.977067	1.07272	1.02143	0.979611	1.02511	0.997603	0.970154	1.02337	0.98334	1.05781	0.998002	0.96996	1.01197	0.994117	1.00975	1.02122	1.001	0.948949	0.986985	1	0.96358	0.997104	1.0203	0.972486	0.985112	0.980395
712	chr2	177396278	177924744	1.00662	0.997104	1.0141	1.00531	1	1.03138	1.03521	1.04865	1.04896	0.997503	0.980395	1.0026	0.901947	0.994316	1.02041	1.0203	1.02583	1.02665	0.990446	0.981474	0.977067	1.07272	1.02143	0.979611	1.02511	0.997603	0.970154	1.02337	0.98334	1.05781	0.998002	0.96996	1.01197	0.994117	1.00975	1.02122	1.001	0.948949	0.986985	1	0.96358	0.997104	1.0203	0.972486	0.985112	0.980395
713	chr2	177924745	178500109	1.00662	0.997104	1.0141	1.00531	1	1.03138	1.03521	1.04865	1.04896	0.997503	0.980395	1.0026	0.901947	0.994316	1.02041	1.0203	1.02583	1.02665	0.990446	0.981474	0.977067	1.07272	1.02143	0.979611	1.02511	0.997603	0.970154	1.02337	0.98334	1.05781	0.998002	0.96996	1.01197	0.994117	1.00975	1.02122	1.001	0.948949	0.986985	1	0.96358	0.997104	1.0203	0.972486	0.985112	0.980395
714	chr2	178500110	179081684	1.00662	0.997104	1.0141	1.00531	1	1.03138	1.03521	1.04865	1.04896	0.997503	0.980395	1.0026	0.901947	0.994316	1.02041	1.0203	1.02583	1.02665	0.990446	0.981474	0.977067	1.07272	1.02143	0.979611	1.02511	0.997603	0.970154	1.02337	0.98334	1.05781	0.998002	0.96996	1.01197	0.994117	1.00975	1.02122	1.001	0.948949	0.986985	1	0.96358	0.997104	1.0203	0.972486	0.985112	0.980395
715	chr2	179081685	179614332	1.00662	0.997104	1.0141	1.00531	1	1.03138	1.03521	1.04865	1.04896	0.997503	0.980395	1.0026	0.901947	0.994316	1.02041	1.0203	1.02583	1.02665	0.990446	0.981474	0.977067	1.07272	1.02143	0.979611	1.02511	0.997603	0.970154	1.02337	0.98334	1.05781	0.998002	0.96996	1.01197	0.994117	1.00975	1.02122	1.001	0.948949	0.986985	1	0.96358	0.997104	1.0203	0.972486	0.985112	0.980395
716	chr2	179614333	180228551	1.00662	0.997104	1.0141	1.00531	1	1.03138	1.03521	1.04865	1.04896	0.997503	0.980395	1.0026	0.901947	0.994316	1.02041	1.0203	1.02583	1.02665	0.990446	0.981474	0.977067	1.07272	1.02143	0.979611	1.02511	0.997603	0.970154	1.02337	0.98334	1.05781	0.998002	0.96996	1.01197	0.994117	1.00975	1.02122	1.001	0.948949	0.986985	1	0.96358	0.997104	1.0203	0.972486	0.985112	0.980395
717	chr2	180228552	180821137	1.00662	0.997104	1.0141	1.00531	1	1.03138	1.03521	1.04865	1.04896	0.997503	0.980395	1.0026	0.901947	0.994316	1.02041	1.0203	1.02583	1.02665	0.990446	0.981474	0.977067	1.07272	1.02143	0.979611	1.02511	0.997603	0.970154	1.02337	0.98334	1.05781	0.998002	0.96996	1.01197	0.994117	1.00975	1.02122	1.001	0.948949	0.986985	1	0.96358	0.997104	1.0203	0.972486	0.985112	0.980395
718	chr2	180821138	181430318	1.00662	0.997104	1.0141	1.00531	1	1.03138	1.03521	1.04865	1.04896	0.997503	0.980395	1.0026	0.901947	0.994316	1.02041	1.0203	1.02583	1.02665	0.990446	0.981474	0.977067	1.07272	1.02143	0.979611	1.02511	0.997603	0.970154	1.02337	0.98334	1.05781	0.998002	0.96996	1.01197	0.994117	1.00975	1.02122	1.001	0.948949	0.986985	1	0.96358	0.997104	1.0203	0.972486	0.985112	0.980395
719	chr2	181430319	182040107	1.00662	0.997104	1.0141	1.00531	1	1.03138	1.03521	1.04865	1.04896	0.997503	0.980395	1.0026	0.901947	0.994316	1.02041	1.0203	1.02583	1.02665	0.990446	0.981474	0.977067	1.07272	1.02143	0.979611	1.02511	0.997603	0.970154	1.02337	0.98334	1.05781	0.998002	0.96996	1.01197	0.994117	1.00975	1.02122	1.001	0.948949	0.986985	1	0.96358	0.997104	1.0203	0.972486	0.985112	0.980395
720	chr2	182040108	182629546	1.00662	0.997104	1.0141	1.00531	1	1.03138	1.03521	1.04865	1.04896	0.997503	0.980395	1.0026	0.901947	0.994316	1.02041	1.0203	1.02583	1.02665	0.990446	0.981474	0.977067	1.07272	1.02143	0.979611	1.02511	0.997603	0.970154	1.02337	0.98334	1.05781	0.998002	0.96996	1.01197	0.994117	1.00975	1.02122	1.001	0.948949	0.986985	1	0.96358	0.997104	1.0203	0.972486	0.985112	0.980395
721	chr2	182629547	183214345	1.00662	0.997104	1.0141	1.00531	1	1.03138	1.03521	1.04865	1.04896	0.997503	0.980395	1.0026	0.901947	0.994316	1.02041	1.0203	1.02583	1.02665	0.990446	0.981474	0.977067	1.07272	1.02143	0.979611	1.02511	0.997603	0.970154	1.02337	0.98334	1.05781	0.998002	0.96996	1.01197	0.994117	1.00975	1.02122	1.001	0.948949	0.986985	1	0.96358	0.997104	1.0203	0.972486	0.985112	0.980395
722	chr2	183214346	183814390	1.00662	0.997104	1.0141	1.00531	1	1.03138	1.03521	1.04865	1.04896	0.997503	0.980395	1.0026	0.901947	0.994316	1.02041	1.0203	1.02583	1.02665	0.990446	0.981474	0.977067	1.07272	1.02143	0.979611	1.02511	0.997603	0.970154	1.02337	0.98334	1.05781	0.998002	0.96996	1.01197	0.994117	1.00975	1.02122	1.001	0.948949	0.986985	1	0.96358	0.997104	1.0203	0.972486	0.985112	0.980395
723	chr2	183814391	184443300	1.00662	0.997104	1.0141	1.00531	1	1.03138	1.03521	1.04865	1.04896	0.997503	0.980395	1.0026	0.901947	0.994316	1.02041	1.0203	1.02583	1.02665	0.990446	0.981474	0.977067	1.07272	1.02143	0.979611	1.02511	0.997603	0.970154	1.02337	0.98334	1.05781	0.998002	0.96996	1.01197	0.994117	1.00975	1.02122	1.001	0.948949	0.986985	1	0.96358	0.997104	1.0203	0.972486	0.985112	0.980395
724	chr2	184443301	185119413	1.00662	0.997104	1.0141	1.00531	1	1.03138	1.03521	1.04865	1.04896	0.997503	0.980395	1.0026	0.901947	0.994316	1.02041	1.0203	1.02583	1.02665	0.990446	0.981474	0.977067	1.07272	1.02143	0.979611	1.02511	0.997603	0.970154	1.02337	0.98334	1.05781	0.998002	0.96996	1.01197	0.994117	1.00975	1.02122	1.001	0.948949	0.986985	1	0.96358	0.997104	1.0203	0.972486	0.985112	0.980395
725	chr2	185119414	185776336	1.00662	0.997104	1.0141	1.00531	1	1.03138	1.03521	1.04865	1.04896	0.997503	0.980395	1.0026	0.901947	0.994316	1.02041	1.0203	1.02583	1.02665	0.990446	0.981474	0.977067	1.07272	1.02143	0.979611	1.02511	0.997603	0.970154	1.02337	0.98334	1.05781	0.998002	0.96996	1.01197	0.994117	1.00975	1.02122	1.001	0.948949	0.986985	1	0.96358	0.997104	1.0203	0.972486	0.985112	0.980395
726	chr2	185776337	186457007	1.00662	0.997104	1.0141	1.00531	1	1.03138	1.03521	1.04865	1.04896	0.997503	0.980395	1.0026	0.901947	0.994316	1.02041	1.0203	1.02583	1.02665	0.990446	0.981474	0.977067	1.07272	1.02143	0.979611	1.02511	0.997603	0.970154	1.02337	0.98334	1.05781	0.998002	0.96996	1.01197	0.994117	1.00975	1.02122	1.001	0.948949	0.986985	1	0.96358	0.997104	1.0203	0.972486	0.985112	0.980395
727	chr2	186457008	187101844	1.00662	0.997104	1.0141	1.00531	1	1.03138	1.03521	1.04865	1.04896	0.997503	0.980395	1.0026	0.901947	0.994316	1.02041	1.0203	1.02583	1.02665	0.990446	0.981474	0.977067	1.07272	1.02143	0.979611	1.02511	0.997603	0.970154	1.02337	0.98334	1.05781	0.998002	0.96996	1.01197	0.994117	1.00975	1.02122	1.001	0.948949	0.986985	1	0.96358	0.997104	1.0203	0.972486	0.985112	0.980395
728	chr2	187101845	187690034	1.00662	0.997104	1.0141	1.00531	1	1.03138	1.03521	1.04865	1.04896	0.997503	0.980395	1.0026	0.901947	0.994316	1.02041	1.0203	1.02583	1.02665	0.990446	0.981474	0.977067	1.07272	1.02143	0.979611	1.02511	0.997603	0.970154	1.02337	0.98334	1.05781	0.998002	0.96996	1.01197	0.994117	1.00975	1.02122	1.001	0.948949	0.986985	1	0.96358	0.997104	1.0203	0.972486	0.985112	0.980395
729	chr2	187690035	188318857	1.00662	0.997104	1.0141	1.00531	1	1.03138	1.03521	1.04865	1.04896	0.997503	0.980395	1.0026	0.901947	0.994316	1.02041	1.0203	1.02583	1.02665	0.990446	0.981474	0.977067	1.07272	1.02143	0.979611	1.02511	0.997603	0.970154	1.02337	0.98334	1.05781	0.998002	0.96996	1.01197	0.994117	1.00975	1.02122	1.001	0.948949	0.986985	1	0.96358	0.997104	1.0203	0.972486	0.985112	0.980395
730	chr2	188318858	188967314	1.00662	0.997104	1.0141	1.00531	1	1.03138	1.03521	1.04865	1.04896	0.997503	0.980395	1.0026	0.901947	0.994316	1.02041	1.0203	1.02583	1.02665	0.990446	0.981474	0.977067	1.07272	1.02143	0.979611	1.02511	0.997603	0.970154	1.02337	0.98334	1.05781	0.998002	0.96996	1.01197	0.994117	1.00975	1.02122	1.001	0.948949	0.986985	1	0.96358	0.997104	1.0203	0.972486	0.985112	0.980395
731	chr2	188967315	189597653	1.00662	0.997104	1.0141	1.00531	1	1.03138	1.03521	1.04865	1.04896	0.997503	0.980395	1.0026	0.901947	0.994316	1.02041	1.0203	1.02583	1.02665	0.990446	0.981474	0.977067	1.07272	1.02143	0.979611	1.02511	0.997603	0.970154	1.02337	0.98334	1.05781	0.998002	0.96996	1.01197	0.994117	1.00975	1.02122	1.001	0.948949	0.986985	1	0.96358	0.997104	1.0203	0.972486	0.985112	0.980395
732	chr2	189597654	190194874	1.00662	0.997104	1.0141	1.00531	1	1.03138	1.03521	1.04865	1.04896	0.997503	0.980395	1.0026	0.901947	0.994316	1.02041	1.0203	1.02583	1.02665	0.990446	0.981474	0.977067	1.07272	1.02143	0.979611	1.02511	0.997603	0.970154	1.02337	0.98334	1.05781	0.998002	0.96996	1.01197	0.994117	1.00975	1.02122	1.001	0.948949	0.986985	1	0.96358	0.997104	1.0203	0.972486	0.985112	0.980395
733	chr2	190194875	190809906	1.00662	0.997104	1.0141	1.00531	1	1.03138	1.03521	1.04865	1.04896	0.997503	0.980395	1.0026	0.901947	0.994316	1.02041	1.0203	1.02583	1.02665	0.990446	0.981474	0.977067	1.07272	1.02143	0.979611	1.02511	0.997603	0.970154	1.02337	0.98334	1.05781	0.998002	0.96996	1.01197	0.994117	1.00975	1.02122	1.001	0.948949	0.986985	1	0.96358	0.997104	1.0203	0.972486	0.985112	0.980395
734	chr2	190809907	191405676	1.00662	0.997104	1.0141	1.00531	1	1.03138	1.03521	1.04865	1.04896	0.997503	0.980395	1.0026	0.901947	0.994316	1.02041	1.0203	1.02583	1.02665	0.990446	0.981474	0.977067	1.07272	1.02143	0.979611	1.02511	0.997603	0.970154	1.02337	0.98334	1.05781	0.998002	0.96996	1.01197	0.994117	1.00975	1.02122	1.001	0.948949	0.986985	1	0.96358	0.997104	1.0203	0.972486	0.985112	0.980395
735	chr2	191405677	191967137	1.00662	0.997104	1.0141	1.00531	1	1.03138	1.03521	1.04865	1.04896	0.997503	0.980395	1.0026	0.901947	0.994316	1.02041	1.0203	1.02583	1.02665	0.990446	0.981474	0.977067	1.07272	1.02143	0.979611	1.02511	0.997603	0.970154	1.02337	0.98334	1.05781	0.998002	0.96996	1.01197	0.994117	1.00975	1.02122	1.001	0.948949	0.986985	1	0.96358	0.997104	1.0203	0.972486	0.985112	0.980395
736	chr2	191967138	192506509	1.00662	0.997104	1.0141	1.00531	1	1.03138	1.03521	1.04865	1.04896	0.997503	0.980395	1.0026	0.901947	0.994316	1.02041	1.0203	1.02583	1.02665	0.990446	0.981474	0.977067	1.07272	1.02143	0.979611	1.02511	0.997603	0.970154	1.02337	0.98334	1.05781	0.998002	0.96996	1.01197	0.994117	1.00975	1.02122	1.001	0.948949	0.986985	1	0.96358	0.997104	1.0203	0.972486	0.985112	0.980395
737	chr2	192506510	193081809	1.00662	0.997104	1.0141	1.00531	1	1.03138	1.03521	1.04865	1.04896	0.997503	0.980395	1.0026	0.901947	0.994316	1.02041	1.0203	1.02583	1.02665	0.990446	0.981474	0.977067	1.07272	1.02143	0.979611	1.02511	0.997603	0.970154	1.02337	0.98334	1.05781	0.998002	0.96996	1.01197	0.994117	1.00975	1.02122	1.001	0.948949	0.986985	1	0.96358	0.997104	1.0203	0.972486	0.985112	0.980395
738	chr2	193081810	193742340	1.00662	0.997104	1.0141	1.00531	1	1.03138	1.03521	1.04865	1.04896	0.997503	0.980395	1.0026	0.901947	0.994316	1.02041	1.0203	1.02583	1.02665	0.990446	0.981474	0.977067	1.07272	1.02143	0.979611	1.02511	0.997603	0.970154	1.02337	0.98334	1.05781	0.998002	0.96996	1.01197	0.994117	1.00975	1.02122	1.001	0.948949	0.986985	1	0.96358	0.997104	1.0203	0.972486	0.985112	0.980395
739	chr2	193742341	194427483	1.00662	0.997104	1.0141	1.00531	1	1.03138	1.03521	1.04865	1.04896	0.997503	0.980395	1.0026	0.901947	0.994316	1.02041	1.0203	1.02583	1.02665	0.990446	0.981474	0.977067	1.07272	1.02143	0.979611	1.02511	0.997603	0.970154	1.02337	0.98334	1.05781	0.998002	0.96996	1.01197	0.994117	1.00975	1.02122	1.001	0.948949	0.986985	1	0.96358	0.997104	1.0203	0.972486	0.985112	0.980395
740	chr2	194427484	195109836	1.00662	0.997104	1.0141	1.00531	1	1.03138	1.03521	1.04865	1.04896	0.997503	0.980395	1.0026	0.901947	0.994316	1.02041	1.0203	1.02583	1.02665	0.990446	0.981474	0.977067	1.07272	1.02143	0.979611	1.02511	0.997603	0.970154	1.02337	0.98334	1.05781	0.998002	0.96996	1.01197	0.994117	1.00975	1.02122	1.001	0.948949	0.986985	1	0.96358	0.997104	1.0203	0.972486	0.985112	0.980395
741	chr2	195109837	195769820	1.00662	0.997104	1.0141	1.00531	1	1.03138	1.03521	1.04865	1.04896	0.997503	0.980395	1.0026	0.901947	0.994316	1.02041	1.0203	1.02583	1.02665	0.990446	0.981474	0.977067	1.07272	1.02143	0.979611	1.02511	0.997603	0.970154	1.02337	0.98334	1.05781	0.998002	0.96996	1.01197	0.994117	1.00975	1.02122	1.001	0.948949	0.986985	1	0.96358	0.997104	1.0203	0.972486	0.985112	0.980395
742	chr2	195769821	196384189	1.00662	0.997104	1.0141	1.00531	1	1.03138	1.03521	1.04865	1.04896	0.997503	0.980395	1.0026	0.901947	0.994316	1.02041	1.0203	1.02583	1.02665	0.990446	0.981474	0.977067	1.07272	1.02143	0.979611	1.02511	0.997603	0.970154	1.02337	0.98334	1.05781	0.998002	0.96996	1.01197	0.994117	1.00975	1.02122	1.001	0.948949	0.986985	1	0.96358	0.997104	1.0203	0.972486	0.985112	0.980395
743	chr2	196384190	196993055	1.00662	0.997104	1.0141	1.00531	1	1.03138	1.03521	1.04865	1.04896	0.997503	0.980395	1.0026	0.901947	0.994316	1.02041	1.0203	1.02583	1.02665	0.990446	0.981474	0.977067	1.07272	1.02143	0.979611	1.02511	0.997603	0.970154	1.02337	0.98334	1.05781	0.998002	0.96996	1.01197	0.994117	1.00975	1.02122	1.001	0.948949	0.986985	1	0.96358	0.997104	1.0203	0.972486	0.985112	0.980395
744	chr2	196993056	197578321	1.00662	0.997104	1.0141	1.00531	1	1.03138	1.03521	1.04865	1.04896	0.997503	0.980395	1.0026	0.901947	0.994316	1.02041	1.0203	1.02583	1.02665	0.990446	0.981474	0.977067	1.07272	1.02143	0.979611	1.02511	0.997603	0.970154	1.02337	0.98334	1.05781	0.998002	0.96996	1.01197	0.994117	1.00975	1.02122	1.001	0.948949	0.986985	1	0.96358	0.997104	1.0203	0.972486	0.985112	0.980395
745	chr2	197578322	198147555	1.00662	0.997104	1.0141	1.00531	1	1.03138	1.03521	1.04865	1.04896	0.997503	0.980395	1.0026	0.901947	0.994316	1.02041	1.0203	1.02583	1.02665	0.990446	0.981474	0.977067	1.07272	1.02143	0.979611	1.02511	0.997603	0.970154	1.02337	0.98334	1.05781	0.998002	0.96996	1.01197	0.994117	1.00975	1.02122	1.001	0.948949	0.986985	1	0.96358	0.997104	1.0203	0.972486	0.985112	0.980395
746	chr2	198147556	198762589	1.00662	0.997104	1.0141	1.00531	1	1.03138	1.03521	1.04865	1.04896	0.997503	0.980395	1.0026	0.901947	0.994316	1.02041	1.0203	1.02583	1.02665	0.990446	0.981474	0.977067	1.07272	1.02143	0.979611	1.02511	0.997603	0.970154	1.02337	0.98334	1.05781	0.998002	0.96996	1.01197	0.994117	1.00975	1.02122	1.001	0.948949	0.986985	1	0.96358	0.997104	1.0203	0.972486	0.985112	0.980395
747	chr2	198762590	199332897	1.00662	0.997104	1.0141	1.00531	1	1.03138	1.03521	1.04865	1.04896	0.997503	0.980395	1.0026	0.901947	0.994316	1.02041	1.0203	1.02583	1.02665	0.990446	0.981474	0.977067	1.07272	1.02143	0.979611	1.02511	0.997603	0.970154	1.02337	0.98334	1.05781	0.998002	0.96996	1.01197	0.994117	1.00975	1.02122	1.001	0.948949	0.986985	1	0.96358	0.997104	1.0203	0.972486	0.985112	0.980395
748	chr2	199332898	199954409	1.00662	0.997104	1.0141	1.00531	1	1.03138	1.03521	1.04865	1.04896	0.997503	0.980395	1.0026	0.901947	0.994316	1.02041	1.0203	1.02583	1.02665	0.990446	0.981474	0.977067	1.07272	1.02143	0.979611	1.02511	0.997603	0.970154	1.02337	0.98334	1.05781	0.998002	0.96996	1.01197	0.994117	1.00975	1.02122	1.001	0.948949	0.986985	1	0.96358	0.997104	1.0203	0.972486	0.985112	0.980395
749	chr2	199954410	200535472	1.00662	0.997104	1.0141	1.00531	1	1.03138	1.03521	1.04865	1.04896	0.997503	0.980395	1.0026	0.901947	0.994316	1.02041	1.0203	1.02583	1.02665	0.990446	0.981474	0.977067	1.07272	1.02143	0.979611	1.02511	0.997603	0.970154	1.02337	0.98334	1.05781	0.998002	0.96996	1.01197	0.994117	1.00975	1.02122	1.001	0.948949	0.986985	1	0.96358	0.997104	1.0203	0.972486	0.985112	0.980395
750	chr2	200535473	201105347	1.00662	0.997104	1.0141	1.00531	1	1.03138	1.03521	1.04865	1.04896	0.997503	0.980395	1.0026	0.901947	0.994316	1.02041	1.0203	1.02583	1.02665	0.990446	0.981474	0.977067	1.07272	1.02143	0.979611	1.02511	0.997603	0.970154	1.02337	0.98334	1.05781	0.998002	0.96996	1.01197	0.994117	1.00975	1.02122	1.001	0.948949	0.986985	1	0.96358	0.997104	1.0203	0.972486	0.985112	0.980395
751	chr2	201105348	201640817	1.00662	0.997104	1.0141	1.00531	1	1.03138	1.03521	1.04865	1.04896	0.997503	0.980395	1.0026	0.901947	0.994316	1.02041	1.0203	1.02583	1.02665	0.990446	0.981474	0.977067	1.07272	1.02143	0.979611	1.02511	0.997603	0.970154	1.02337	0.98334	1.05781	0.998002	0.96996	1.01197	0.994117	1.00975	1.02122	1.001	0.948949	0.986985	1	0.96358	0.997104	1.0203	0.972486	0.985112	0.980395
752	chr2	201640818	202243835	1.00662	0.997104	1.0141	1.00531	1	1.03138	1.03521	1.04865	1.04896	0.997503	0.980395	1.0026	0.901947	0.994316	1.02041	1.0203	1.02583	1.02665	0.990446	0.981474	0.977067	1.07272	1.02143	0.979611	1.02511	0.997603	0.970154	1.02337	0.98334	1.05781	0.998002	0.96996	1.01197	0.994117	1.00975	1.02122	1.001	0.948949	0.986985	1	0.96358	0.997104	1.0203	0.972486	0.985112	0.980395
753	chr2	202243836	202819225	1.00662	0.997104	1.0141	1.00531	1	1.03138	1.03521	1.04865	1.04896	0.997503	0.980395	1.0026	0.901947	0.994316	1.02041	1.0203	1.02583	1.02665	0.990446	0.981474	0.977067	1.07272	1.02143	0.979611	1.02511	0.997603	0.970154	1.02337	0.98334	1.05781	0.998002	0.96996	1.01197	0.994117	1.00975	1.02122	1.001	0.948949	0.986985	1	0.96358	0.997104	1.0203	0.972486	0.985112	0.980395
754	chr2	202819226	203379382	1.00662	0.997104	1.0141	1.00531	1	1.03138	1.03521	1.04865	1.04896	0.997503	0.980395	1.0026	0.901947	0.994316	1.02041	1.0203	1.02583	1.02665	0.990446	0.981474	0.977067	1.07272	1.02143	0.979611	1.02511	0.997603	0.970154	1.02337	0.98334	1.05781	0.998002	0.96996	1.01197	0.994117	1.00975	1.02122	1.001	0.948949	0.986985	1	0.96358	0.997104	1.0203	0.972486	0.985112	0.980395
755	chr2	203379383	203988825	1.00662	0.997104	1.0141	1.00531	1	1.03138	1.03521	1.04865	1.04896	0.997503	0.980395	1.0026	0.901947	0.994316	1.02041	1.0203	1.02583	1.02665	0.990446	0.981474	0.977067	1.07272	1.02143	0.979611	1.02511	0.997603	0.970154	1.02337	0.98334	1.05781	0.998002	0.96996	1.01197	0.994117	1.00975	1.02122	1.001	0.948949	0.986985	1	0.96358	0.997104	1.0203	0.972486	0.985112	0.980395
756	chr2	203988826	204595178	1.00662	0.997104	1.0141	1.00531	1	1.03138	1.03521	1.04865	1.04896	0.997503	0.980395	1.0026	0.901947	0.994316	1.02041	1.0203	1.02583	1.02665	0.990446	0.981474	0.977067	1.07272	1.02143	0.979611	1.02511	0.997603	0.970154	1.02337	0.98334	1.05781	0.998002	0.96996	1.01197	0.994117	1.00975	1.02122	1.001	0.948949	0.986985	1	0.96358	0.997104	1.0203	0.972486	0.985112	0.980395
757	chr2	204595179	205122691	1.00662	0.997104	1.0141	1.00531	1	1.03138	1.03521	1.04865	1.04896	0.997503	0.980395	1.0026	0.901947	0.994316	1.02041	1.0203	1.02583	1.02665	0.990446	0.981474	0.977067	1.07272	1.02143	0.979611	1.02511	0.997603	0.970154	1.02337	0.98334	1.05781	0.998002	0.96996	1.01197	0.994117	1.00975	1.02122	1.001	0.948949	0.986985	1	0.96358	0.997104	1.0203	0.972486	0.985112	0.980395
758	chr2	205122692	205664049	1.00662	0.997104	1.0141	1.00531	1	1.03138	1.03521	1.04865	1.04896	0.997503	0.980395	1.0026	0.901947	0.994316	1.02041	1.0203	1.02583	1.02665	0.990446	0.981474	0.977067	1.07272	1.02143	0.979611	1.02511	0.997603	0.970154	1.02337	0.98334	1.05781	0.998002	0.96996	1.01197	0.994117	1.00975	1.02122	1.001	0.948949	0.986985	1	0.96358	0.997104	1.0203	0.972486	0.985112	0.980395
759	chr2	205664050	206248399	1.00662	0.997104	1.0141	1.00531	1	1.03138	1.03521	1.04865	1.04896	0.997503	0.980395	1.0026	0.901947	0.994316	1.02041	1.0203	1.02583	1.02665	0.990446	0.981474	1.05169	1.07272	1.02143	0.979611	1.02511	0.997603	0.970154	1.02337	0.98334	1.05781	0.998002	0.96996	1.01197	0.994117	1.00975	1.02122	1.001	0.948949	0.986985	1	0.96358	0.997104	1.0203	0.972486	0.985112	0.980395
760	chr2	206248400	206775185	1.00662	0.997104	1.0141	1.00531	1	1.03138	1.03521	1.04865	1.04896	0.997503	0.980395	1.0026	0.901947	0.994316	1.02041	1.0203	1.02583	1.02665	0.990446	0.981474	1.05169	1.07272	1.02143	0.979611	1.02511	0.997603	0.970154	1.02337	0.98334	1.05781	0.998002	0.96996	1.01197	0.994117	1.00975	1.02122	1.001	0.948949	0.986985	1	0.96358	0.997104	1.0203	0.972486	0.985112	0.980395
761	chr2	206775186	207360490	1.00662	0.997104	1.0141	1.00531	1	1.03138	1.03521	1.04865	1.04896	0.997503	0.980395	1.0026	0.901947	0.994316	1.02041	1.0203	1.02583	1.02665	0.990446	0.981474	1.05169	1.07272	1.02143	0.979611	1.02511	0.997603	0.970154	1.02337	0.98334	1.05781	0.998002	0.96996	1.01197	0.994117	1.00975	1.02122	1.001	0.948949	0.986985	1	0.96358	0.997104	1.0203	0.972486	0.985112	0.980395
762	chr2	207360491	207937130	1.00662	0.997104	1.0141	1.00531	1	1.03138	1.03521	1.04865	1.04896	0.997503	0.980395	1.0026	0.901947	0.994316	1.02041	1.0203	1.02583	1.02665	0.990446	0.981474	1.05169	1.07272	1.02143	0.979611	1.02511	0.997603	0.970154	1.02337	0.98334	1.05781	0.998002	0.96996	1.01197	0.994117	1.00975	1.02122	1.001	0.948949	0.986985	1	0.96358	0.997104	1.0203	0.972486	0.985112	0.980395
763	chr2	207937131	208478443	1.00662	0.997104	1.0141	1.00531	1	1.03138	1.03521	1.04865	1.04896	0.997503	0.980395	1.0026	0.901947	0.994316	1.02041	1.0203	1.02583	1.02665	0.990446	0.981474	1.05169	1.07272	1.02143	0.979611	1.02511	0.997603	0.970154	1.02337	0.98334	1.05781	0.998002	0.96996	1.01197	0.994117	1.00975	1.02122	1.001	0.948949	0.986985	1	0.96358	0.997104	1.0203	0.972486	0.985112	0.980395
764	chr2	208478444	209044578	1.00662	0.997104	1.0141	1.00531	1	1.03138	1.03521	1.04865	1.04896	0.997503	0.980395	1.0026	0.901947	0.994316	1.02041	1.0203	1.02583	1.02665	0.990446	0.981474	1.05169	1.07272	1.02143	0.979611	1.02511	0.997603	0.970154	1.02337	0.98334	1.05781	0.998002	0.96996	1.01197	0.994117	1.00975	1.02122	1.001	0.948949	0.986985	1	0.96358	0.997104	1.0203	0.972486	0.985112	0.980395
765	chr2	209044579	209665572	1.00662	0.997104	1.0141	1.00531	1	1.03138	1.03521	1.04865	1.04896	0.997503	0.980395	1.0026	0.901947	0.994316	1.02041	1.0203	1.02583	1.02665	0.990446	0.981474	1.05169	1.07272	1.02143	0.979611	1.02511	0.997603	0.970154	1.02337	0.98334	1.05781	0.998002	0.96996	1.01197	0.994117	1.00975	1.02122	1.001	0.948949	0.986985	1	0.96358	0.997104	1.0203	0.972486	0.985112	0.980395
766	chr2	209665573	210327104	1.00662	0.997104	1.0141	1.00531	1	1.03138	1.03521	1.04865	1.04896	0.997503	0.980395	1.0026	0.901947	0.994316	1.02041	1.0203	1.02583	1.02665	0.990446	0.981474	1.05169	1.07272	1.02143	0.979611	1.02511	0.997603	0.970154	1.02337	0.98334	1.05781	0.998002	0.96996	1.01197	0.994117	1.00975	1.02122	1.001	0.948949	0.986985	1	0.96358	0.997104	1.0203	0.972486	0.985112	0.980395
767	chr2	210327105	210935925	1.00662	0.997104	1.0141	1.00531	1	1.03138	1.03521	1.04865	1.04896	0.997503	0.980395	1.0026	0.901947	0.994316	1.02041	1.0203	1.02583	1.02665	0.990446	0.981474	1.05169	1.07272	1.02143	0.979611	1.02511	0.997603	0.970154	1.02337	0.98334	1.05781	0.998002	0.96996	1.01197	0.994117	1.00975	1.02122	1.001	0.948949	0.986985	1	0.96358	0.997104	1.0203	0.972486	0.985112	0.980395
768	chr2	210935926	211557616	1.00662	0.997104	1.0141	1.00531	1	1.03138	1.03521	1.04865	1.04896	0.997503	0.980395	1.0026	0.901947	0.994316	1.02041	1.0203	1.02583	1.02665	0.990446	0.981474	1.05169	1.07272	1.02143	0.979611	1.02511	0.997603	0.970154	1.02337	0.98334	1.05781	0.998002	0.96996	1.01197	0.994117	1.00975	1.02122	1.001	0.948949	0.986985	1	0.96358	0.997104	1.0203	0.972486	0.985112	0.980395
769	chr2	211557617	212201685	1.00662	0.997104	1.0141	1.00531	1	1.03138	1.03521	1.04865	1.04896	0.997503	0.980395	1.0026	0.901947	0.994316	1.02041	1.0203	1.02583	1.02665	0.990446	0.981474	1.05169	1.07272	1.02143	0.979611	1.02511	0.997603	0.970154	1.02337	0.98334	1.05781	0.998002	0.96996	1.01197	0.994117	1.00975	1.02122	1.001	0.948949	0.986985	1	0.96358	0.997104	1.0203	0.972486	0.985112	0.980395
770	chr2	212201686	212847733	1.00662	0.997104	1.0141	1.00531	1	1.03138	1.03521	1.04865	1.04896	0.997503	0.980395	1.0026	0.901947	0.994316	1.02041	1.0203	1.02583	1.02665	0.990446	0.981474	1.05169	1.07272	1.02143	0.979611	1.02511	0.997603	0.970154	1.02337	0.98334	1.05781	0.998002	0.96996	1.01197	0.994117	1.00975	1.02122	1.001	0.948949	0.986985	1	0.96358	0.997104	1.0203	0.972486	0.985112	0.980395
771	chr2	212847734	213494318	1.00662	0.997104	1.0141	1.00531	1	1.03138	1.03521	1.04865	1.04896	0.997503	0.980395	1.0026	0.901947	0.994316	1.02041	1.0203	1.02583	1.02665	0.990446	0.981474	1.05169	1.07272	1.02143	0.979611	1.02511	0.997603	0.970154	1.02337	0.98334	1.05781	0.998002	0.96996	1.01197	0.994117	1.00975	1.02122	1.001	0.948949	0.986985	1	0.96358	0.997104	1.0203	0.972486	0.985112	0.980395
772	chr2	213494319	214086631	1.00662	0.997104	1.0141	1.00531	1	1.03138	1.03521	1.04865	1.04896	0.997503	0.980395	1.0026	0.901947	0.994316	1.02041	1.0203	1.02583	1.02665	0.990446	0.981474	1.05169	1.07272	1.02143	0.979611	1.02511	0.997603	0.970154	1.02337	0.98334	1.05781	0.998002	0.96996	1.01197	0.994117	1.00975	1.02122	1.001	0.948949	0.986985	1	0.96358	0.997104	1.0203	0.972486	0.985112	0.980395
773	chr2	214086632	214727215	1.00662	0.997104	1.0141	1.00531	1	1.03138	1.03521	1.04865	1.04896	0.997503	0.980395	1.0026	0.901947	0.994316	1.02041	1.0203	1.02583	1.02665	0.990446	0.981474	1.05169	1.07272	1.02143	0.979611	1.02511	0.997603	0.970154	1.02337	0.98334	1.05781	0.998002	0.96996	1.01197	0.994117	1.00975	1.02122	1.001	0.948949	0.986985	1	0.96358	0.997104	1.0203	0.972486	0.985112	0.980395
774	chr2	214727216	215339671	1.00662	0.997104	1.0141	1.00531	1	1.03138	1.03521	1.04865	1.04896	0.997503	0.980395	1.0026	0.901947	0.994316	1.02041	1.0203	1.02583	1.02665	0.990446	0.981474	1.05169	1.07272	1.02143	0.979611	1.02511	0.997603	0.970154	1.02337	0.98334	1.05781	0.998002	0.96996	1.01197	0.994117	1.00975	1.02122	1.001	0.948949	0.986985	1	0.96358	0.997104	1.0203	0.972486	0.985112	0.980395
775	chr2	215339672	215951543	1.00662	0.997104	1.0141	1.00531	1	1.03138	1.03521	1.04865	1.04896	0.997503	0.980395	1.0026	0.901947	0.994316	1.02041	1.0203	1.02583	1.02665	0.990446	0.981474	1.05169	1.07272	1.02143	0.979611	1.02511	0.997603	0.970154	1.02337	0.98334	1.05781	0.998002	0.96996	1.01197	0.994117	1.00975	1.02122	1.001	0.948949	0.986985	1	0.96358	0.997104	1.0203	0.972486	0.985112	0.980395
776	chr2	215951544	216518299	1.00662	0.997104	1.0141	1.00531	1	1.03138	1.03521	1.04865	1.04896	0.997503	0.980395	1.0026	0.901947	0.994316	1.02041	1.0203	1.02583	1.02665	0.990446	0.981474	1.05169	1.07272	1.02143	0.979611	1.02511	0.997603	0.970154	1.02337	0.98334	1.05781	0.998002	0.96996	1.01197	0.994117	1.00975	1.02122	1.001	0.948949	0.986985	1	0.96358	0.997104	1.0203	0.972486	0.985112	0.980395
777	chr2	216518300	217059858	1.00662	0.997104	1.0141	1.00531	1	1.03138	1.03521	1.04865	1.04896	0.997503	0.980395	1.0026	0.901947	0.994316	1.02041	1.0203	1.02583	1.02665	0.990446	0.981474	1.05169	1.07272	1.02143	0.979611	1.02511	0.997603	0.970154	1.02337	0.98334	1.05781	0.998002	0.96996	1.01197	0.994117	1.00975	1.02122	1.001	0.948949	0.986985	1	0.96358	0.997104	1.0203	0.972486	0.985112	0.980395
778	chr2	217059859	217563699	1.00662	0.997104	1.0141	1.00531	1	1.03138	1.03521	1.04865	1.04896	0.997503	0.980395	1.0026	0.901947	0.994316	1.02041	1.0203	1.02583	1.02665	0.990446	0.981474	1.05169	1.07272	1.02143	0.979611	1.02511	0.997603	0.970154	1.02337	0.98334	1.05781	0.998002	0.96996	1.01197	0.994117	1.00975	1.02122	1.001	0.948949	0.986985	1	0.96358	0.997104	1.0203	0.972486	0.985112	0.980395
779	chr2	217563700	218084158	1.00662	0.997104	1.0141	1.00531	1	1.03138	1.03521	1.04865	1.04896	0.997503	0.980395	1.0026	0.901947	0.994316	1.02041	1.0203	1.02583	1.02665	0.990446	0.981474	1.05169	1.07272	1.02143	0.979611	1.02511	0.997603	0.970154	1.02337	0.98334	1.05781	0.998002	0.96996	1.01197	0.994117	1.00975	1.02122	1.001	0.948949	0.986985	1	0.96358	0.997104	1.0203	0.972486	0.985112	0.980395
780	chr2	218084159	218587933	1.00662	0.997104	1.0141	1.00531	1	1.03138	1.03521	1.04865	1.04896	0.997503	0.980395	1.0026	0.901947	0.994316	1.02041	1.0203	1.02583	1.02665	0.990446	0.981474	1.05169	1.07272	1.02143	0.979611	1.02511	0.997603	0.970154	1.02337	0.98334	1.05781	0.998002	0.96996	1.01197	0.994117	1.00975	1.02122	1.001	0.948949	0.986985	1	0.96358	0.997104	1.0203	0.972486	0.985112	0.980395
781	chr2	218587934	219104607	1.00662	0.997104	1.0141	1.00531	1	1.03138	1.03521	1.04865	1.04896	0.997503	0.980395	1.0026	0.901947	0.994316	1.02041	1.0203	1.02583	1.02665	0.990446	0.981474	1.05169	1.07272	1.02143	0.979611	1.02511	0.997603	0.970154	1.02337	0.98334	1.05781	0.998002	0.96996	1.01197	0.994117	1.00975	1.02122	1.001	0.948949	0.986985	1	0.96358	0.997104	1.0203	0.972486	0.985112	0.980395
782	chr2	219104608	219675654	1.00662	0.997104	1.0141	1.00531	1	1.03138	1.03521	1.04865	1.04896	0.997503	0.980395	1.0026	0.901947	0.994316	1.02041	1.0203	1.02583	1.02665	0.990446	0.981474	1.05169	1.07272	1.02143	0.979611	1.02511	0.997603	0.970154	1.02337	0.98334	1.05781	0.998002	0.96996	1.01197	0.994117	1.00975	1.02122	1.001	0.948949	0.986985	1	0.96358	0.997104	1.0203	0.972486	0.985112	0.980395
783	chr2	219675655	220216779	1.00662	0.997104	1.0141	1.00531	0.818403	1.03138	1.03521	1.04865	1.04896	0.997503	0.980395	1.0026	1.06588	0.994316	1.02041	1.0203	1.02583	1.02665	0.990446	0.981474	1.05169	1.07272	1.02143	0.979611	1.02511	0.997603	0.970154	1.02337	0.98334	1.05781	0.998002	0.96996	1.01197	0.994117	1.00975	1.02122	1.001	0.948949	0.986985	1	0.96358	0.997104	1.0203	0.972486	0.985112	0.980395
784	chr2	220216780	220747118	1.00662	0.997104	1.0141	1.00531	0.818403	1.03138	1.03521	1.04865	1.04896	0.997503	0.980395	1.0026	1.06588	0.994316	1.02041	1.0203	1.02583	1.02665	0.990446	0.981474	1.05169	1.07272	1.02143	0.979611	1.02511	0.997603	0.970154	1.02337	0.98334	1.05781	0.998002	0.96996	1.01197	0.994117	1.00975	1.02122	1.001	0.948949	0.986985	1	0.96358	0.997104	1.0203	0.972486	0.985112	0.980395
785	chr2	220747119	221294784	1.00662	0.997104	1.0141	1.00531	0.818403	1.03138	1.03521	1.04865	1.04896	0.997503	0.980395	1.0026	1.06588	0.994316	1.02041	1.0203	1.02583	1.02665	0.990446	0.981474	1.05169	1.07272	1.02143	0.979611	1.02511	0.997603	0.970154	1.02337	0.98334	1.05781	0.998002	0.96996	1.01197	0.994117	1.00975	1.02122	1.001	0.948949	0.986985	1	0.96358	0.997104	1.0203	0.972486	0.985112	0.980395
786	chr2	221294785	221885611	1.00662	0.997104	1.0141	1.00531	0.818403	1.03138	1.03521	1.04865	1.04896	0.997503	0.980395	1.0026	1.06588	0.994316	1.02041	1.0203	1.02583	1.02665	0.990446	0.981474	1.05169	1.07272	1.02143	0.979611	1.02511	0.997603	0.970154	1.02337	0.98334	1.05781	0.998002	0.96996	1.01197	0.994117	1.00975	1.02122	1.001	0.948949	0.986985	1	0.96358	0.997104	1.0203	0.972486	0.985112	0.980395
787	chr2	221885612	222461365	1.00662	0.997104	1.0141	1.00531	0.818403	1.03138	1.03521	1.04865	1.04896	0.997503	0.980395	1.0026	1.06588	0.994316	1.02041	1.0203	1.02583	1.02665	0.990446	0.981474	1.05169	1.07272	1.02143	0.979611	1.02511	0.997603	0.970154	1.02337	0.98334	1.05781	0.998002	0.96996	1.01197	0.994117	1.00975	1.02122	1.001	0.948949	0.986985	1	0.96358	0.997104	1.0203	0.972486	0.985112	0.980395
788	chr2	222461366	223056810	1.00662	0.997104	1.0141	1.00531	0.818403	1.03138	1.03521	1.04865	1.04896	0.997503	0.980395	1.0026	1.06588	0.994316	1.02041	1.0203	1.02583	1.02665	0.990446	0.981474	1.05169	1.07272	1.02143	0.979611	1.02511	0.997603	0.970154	1.02337	0.98334	1.05781	0.998002	0.96996	1.01197	0.994117	1.00975	1.02122	1.001	0.948949	0.986985	1	0.96358	0.997104	1.0203	0.972486	0.985112	0.980395
789	chr2	223056811	223645923	1.00662	0.997104	1.0141	1.00531	0.818403	1.03138	1.03521	1.04865	1.04896	0.997503	0.980395	1.0026	1.06588	0.994316	1.02041	1.0203	1.02583	1.02665	0.990446	0.981474	1.05169	1.07272	1.02143	0.979611	1.02511	0.997603	0.970154	1.02337	0.98334	1.05781	0.998002	0.96996	1.01197	0.994117	1.00975	1.02122	1.001	0.948949	0.986985	1	0.96358	0.997104	1.0203	0.972486	0.985112	0.980395
790	chr2	223645924	224244990	1.00662	0.997104	1.0141	1.00531	0.818403	1.03138	1.03521	1.04865	1.04896	0.997503	0.980395	1.0026	1.06588	0.994316	1.02041	1.0203	1.02583	1.02665	0.990446	0.981474	1.05169	1.07272	1.02143	0.979611	1.02511	0.997603	0.970154	1.02337	0.98334	1.05781	0.998002	0.96996	1.01197	0.994117	1.00975	1.02122	1.001	0.948949	0.986985	1	0.96358	0.997104	1.0203	0.972486	0.985112	0.980395
791	chr2	224244991	224837838	1.00662	0.997104	1.0141	1.00531	0.818403	1.03138	1.03521	1.04865	1.04896	0.997503	0.980395	1.0026	1.06588	0.994316	1.02041	1.0203	1.02583	1.02665	0.990446	0.981474	1.05169	1.07272	1.02143	0.979611	1.02511	0.997603	0.970154	1.02337	0.98334	1.05781	0.998002	0.96996	1.01197	0.994117	1.00975	1.02122	1.001	0.948949	0.986985	1	0.96358	0.997104	1.0203	0.972486	0.985112	0.980395
792	chr2	224837839	225390734	1.00662	0.997104	1.0141	1.00531	0.818403	1.03138	1.03521	1.04865	1.04896	0.997503	0.980395	1.0026	1.06588	0.994316	1.02041	1.0203	1.02583	1.02665	0.990446	0.981474	1.05169	1.07272	1.02143	0.979611	1.02511	0.997603	0.970154	1.02337	0.98334	1.05781	0.998002	0.96996	1.01197	0.994117	1.00975	1.02122	1.001	0.948949	0.986985	1	0.96358	0.997104	1.0203	0.972486	0.985112	0.980395
793	chr2	225390735	225979313	1.00662	0.997104	1.0141	1.00531	0.818403	1.03138	1.03521	1.04865	1.04896	0.997503	0.980395	1.0026	1.06588	0.994316	1.02041	1.0203	1.02583	1.02665	0.990446	0.981474	1.05169	1.07272	1.02143	0.979611	1.02511	0.997603	0.970154	1.02337	0.98334	1.05781	0.998002	0.96996	1.01197	0.994117	1.00975	1.02122	1.001	0.948949	0.986985	1	0.96358	0.997104	1.0203	0.972486	0.985112	0.980395
794	chr2	225979314	226574258	1.00662	0.997104	1.0141	1.00531	0.818403	1.03138	1.03521	1.04865	1.04896	0.997503	0.980395	1.0026	1.06588	0.994316	1.02041	1.0203	1.02583	1.02665	0.990446	0.981474	1.05169	1.07272	1.02143	0.979611	1.02511	0.997603	0.970154	1.02337	0.98334	1.05781	0.998002	0.96996	1.01197	0.994117	1.00975	1.02122	1.001	0.948949	0.986985	1	0.96358	0.997104	1.0203	0.972486	0.985112	0.980395
795	chr2	226574259	227179963	1.00662	0.997104	1.0141	1.00531	0.818403	1.03138	1.03521	1.04865	1.04896	0.997503	0.980395	1.0026	1.06588	0.994316	1.02041	1.0203	1.02583	1.02665	0.990446	0.981474	1.05169	1.07272	1.02143	0.979611	1.02511	0.997603	0.970154	1.02337	0.98334	1.05781	0.998002	0.96996	1.01197	0.994117	1.00975	1.02122	1.001	0.948949	0.986985	1	0.96358	0.997104	1.0203	0.972486	0.985112	0.980395
796	chr2	227179964	227734047	1.00662	0.997104	1.0141	1.00531	0.818403	1.03138	1.03521	1.04865	1.04896	0.997503	0.980395	1.0026	1.06588	0.994316	1.02041	1.0203	1.02583	1.02665	0.990446	0.981474	1.05169	1.07272	1.02143	0.979611	1.02511	0.997603	0.970154	1.02337	0.98334	1.05781	0.998002	0.96996	1.01197	0.994117	1.00975	1.02122	1.001	0.948949	0.986985	1	0.96358	0.997104	1.0203	0.972486	0.985112	0.980395
797	chr2	227734048	228284248	1.00662	0.997104	1.0141	1.00531	0.818403	1.03138	1.03521	1.04865	1.04896	0.997503	0.980395	1.0026	1.06588	0.994316	1.02041	1.0203	1.02583	1.02665	0.990446	0.981474	1.05169	1.07272	1.02143	0.979611	1.02511	0.997603	0.970154	1.02337	0.98334	1.05781	0.998002	0.96996	1.01197	0.994117	1.00975	1.02122	1.001	0.948949	0.986985	1	0.96358	0.997104	1.0203	0.972486	0.985112	0.980395
798	chr2	228284249	228888784	1.00662	0.997104	1.0141	1.00531	0.818403	1.03138	1.03521	1.04865	1.04896	0.997503	0.980395	1.0026	1.06588	0.994316	1.02041	1.0203	1.02583	1.02665	0.990446	0.981474	1.05169	1.07272	1.02143	0.979611	1.02511	0.997603	0.970154	1.02337	0.98334	1.05781	0.998002	0.96996	1.01197	0.994117	1.00975	1.02122	1.001	0.948949	0.986985	1	0.96358	0.997104	1.0203	0.972486	0.985112	0.980395
799	chr2	228888785	229517674	1.00662	0.997104	1.0141	1.00531	0.818403	1.03138	1.03521	1.04865	1.04896	0.997503	0.980395	1.0026	1.06588	0.994316	1.02041	1.0203	1.02583	1.02665	0.990446	0.981474	1.05169	1.07272	1.02143	0.979611	1.02511	0.997603	0.970154	1.02337	0.98334	1.05781	0.998002	0.96996	1.01197	0.994117	1.00975	1.02122	1.001	0.948949	0.986985	1	0.96358	0.997104	1.0203	0.972486	0.985112	0.980395
800	chr2	229517675	230092662	1.00662	0.997104	1.0141	1.00531	0.818403	1.03138	1.03521	1.04865	1.04896	0.997503	0.980395	1.0026	1.06588	0.994316	1.02041	1.0203	1.02583	1.02665	0.990446	0.981474	1.05169	1.07272	1.02143	0.979611	1.02511	0.997603	0.970154	1.02337	0.98334	1.05781	0.998002	0.96996	1.01197	0.994117	1.00975	1.02122	1.001	0.948949	0.986985	1	0.96358	0.997104	1.0203	0.972486	0.985112	0.980395
801	chr2	230092663	230641378	1.00662	0.997104	1.0141	1.00531	0.818403	1.03138	1.03521	1.04865	1.04896	0.997503	0.980395	1.0026	1.06588	0.994316	1.02041	1.0203	1.02583	1.02665	0.990446	0.981474	1.05169	1.07272	1.02143	0.979611	1.02511	0.997603	0.970154	1.02337	0.98334	1.05781	0.998002	0.96996	1.01197	0.994117	1.00975	1.02122	1.001	0.948949	0.986985	1	0.96358	0.997104	1.0203	0.972486	0.985112	0.980395
802	chr2	230641379	231237245	1.00662	0.997104	1.0141	1.00531	0.818403	1.03138	1.03521	1.04865	1.04896	0.997503	0.980395	1.0026	1.06588	0.994316	1.02041	1.0203	1.02583	1.02665	0.990446	0.981474	1.05169	1.07272	1.02143	0.979611	1.02511	0.997603	0.970154	1.02337	0.98334	1.05781	0.998002	0.96996	1.01197	0.994117	1.00975	1.02122	1.001	0.948949	0.986985	1	0.96358	0.997104	1.0203	0.972486	0.985112	0.980395
803	chr2	231237246	231801013	1.00662	0.997104	1.0141	1.00531	0.818403	1.03138	1.03521	1.04865	1.04896	0.997503	0.980395	1.0026	1.06588	0.994316	1.02041	1.0203	1.02583	1.02665	0.990446	0.981474	1.05169	1.07272	1.02143	0.979611	1.02511	0.997603	0.970154	1.02337	0.98334	1.05781	0.998002	0.96996	1.01197	0.994117	1.00975	1.02122	1.001	0.948949	0.986985	1	0.96358	0.997104	1.0203	0.972486	0.985112	0.980395
804	chr2	231801014	232338955	1.00662	0.997104	1.0141	1.00531	0.818403	1.03138	1.03521	1.04865	1.04896	0.997503	0.980395	1.0026	1.06588	0.994316	1.02041	1.0203	1.02583	1.02665	0.990446	0.981474	1.05169	1.07272	1.02143	0.979611	1.02511	0.997603	0.970154	1.02337	0.98334	1.05781	0.998002	0.96996	1.01197	0.994117	1.00975	1.02122	1.001	0.948949	0.986985	1	0.96358	0.997104	1.0203	0.972486	0.985112	0.980395
805	chr2	232338956	232932775	1.00662	0.997104	1.0141	1.00531	0.818403	1.03138	1.03521	1.04865	1.04896	0.997503	0.980395	1.0026	1.06588	0.994316	1.02041	1.0203	1.02583	1.02665	0.990446	0.981474	1.05169	1.07272	1.02143	0.979611	1.02511	0.997603	0.970154	1.02337	0.98334	1.05781	0.998002	0.96996	1.01197	0.994117	1.00975	1.02122	1.001	0.948949	0.986985	1	0.96358	0.997104	1.0203	0.972486	0.985112	0.980395
806	chr2	232932776	233477646	1.00662	0.997104	1.0141	1.00531	0.818403	1.03138	1.03521	1.04865	1.04896	0.997503	0.980395	1.0026	1.06588	0.994316	1.02041	1.0203	1.02583	1.02665	0.990446	0.981474	1.05169	1.07272	1.02143	0.979611	1.02511	0.997603	0.970154	1.02337	0.98334	1.05781	0.998002	0.96996	1.01197	0.994117	1.00975	1.02122	1.001	0.948949	0.986985	1	0.96358	0.997104	1.0203	0.972486	0.985112	0.980395
807	chr2	233477647	234100936	1.00662	0.997104	1.0141	1.00531	0.818403	1.03138	1.03521	1.04865	1.04896	0.997503	0.980395	1.0026	1.06588	0.994316	1.02041	1.0203	1.02583	1.02665	0.990446	0.981474	1.05169	1.07272	1.02143	0.979611	1.02511	0.997603	0.970154	1.02337	0.98334	1.05781	0.998002	0.96996	1.01197	0.994117	1.00975	1.02122	1.001	0.948949	0.986985	1	0.96358	0.997104	1.0203	0.972486	0.985112	0.980395
808	chr2	234100937	234655752	1.00662	0.997104	1.0141	1.00531	0.818403	1.03138	1.03521	1.04865	1.04896	0.997503	0.980395	1.0026	1.06588	0.994316	1.02041	1.0203	1.02583	1.02665	0.990446	0.981474	1.05169	1.07272	1.02143	0.979611	1.02511	0.997603	0.970154	1.02337	0.98334	1.05781	0.998002	0.96996	1.01197	0.994117	1.00975	1.02122	1.001	0.948949	0.986985	1	0.96358	0.997104	1.0203	0.972486	0.985112	0.980395
809	chr2	234655753	235196495	1.00662	0.997104	1.0141	1.00531	0.818403	1.03138	1.03521	1.04865	1.04896	0.997503	0.980395	1.0026	1.06588	0.994316	1.02041	1.0203	1.02583	1.02665	0.990446	0.981474	1.05169	1.07272	1.02143	0.979611	1.02511	0.997603	0.970154	1.02337	0.98334	1.05781	0.998002	0.96996	1.01197	0.994117	1.00975	1.02122	1.001	0.948949	0.986985	1	0.96358	0.997104	1.0203	0.972486	0.985112	0.980395
810	chr2	235196496	235733012	1.00662	0.997104	1.0141	1.00531	0.818403	1.03138	1.03521	1.04865	1.04896	0.997503	0.980395	1.0026	1.06588	0.994316	1.02041	1.0203	1.02583	1.02665	0.990446	0.981474	1.05169	1.07272	1.02143	0.979611	1.02511	0.997603	0.970154	1.02337	0.98334	1.05781	0.998002	0.96996	1.01197	0.994117	1.00975	1.02122	1.001	0.948949	0.986985	1	0.96358	0.997104	1.0203	0.972486	0.985112	0.980395
811	chr2	235733013	236251506	1.00662	0.997104	1.0141	1.00531	0.818403	1.03138	1.03521	1.04865	1.04896	0.997503	0.980395	1.0026	1.06588	0.994316	1.02041	1.0203	1.02583	1.02665	0.990446	0.981474	1.05169	1.07272	1.02143	0.979611	1.02511	0.997603	0.970154	1.02337	0.98334	1.05781	0.998002	0.96996	1.01197	0.994117	1.00975	1.02122	1.001	0.948949	0.986985	1	0.96358	0.997104	1.0203	0.972486	0.985112	0.980395
812	chr2	236251507	236771372	1.00662	0.997104	1.0141	1.00531	0.818403	1.03138	1.03521	1.04865	1.04896	0.997503	0.980395	1.0026	1.06588	0.994316	1.02041	1.0203	1.02583	1.02665	0.990446	0.981474	1.05169	1.07272	1.02143	0.979611	1.02511	0.997603	0.970154	1.02337	0.98334	1.05781	0.998002	0.96996	1.01197	0.994117	1.00975	1.02122	1.001	0.948949	0.986985	1	0.96358	0.997104	1.0203	0.972486	0.985112	0.980395
813	chr2	236771373	237286131	1.00662	0.997104	1.0141	1.00531	0.818403	1.03138	1.03521	1.04865	1.04896	0.997503	0.980395	1.0026	1.06588	0.994316	1.02041	1.0203	1.02583	1.02665	0.990446	0.981474	1.05169	1.07272	1.02143	0.979611	1.02511	0.997603	0.970154	1.02337	0.98334	1.05781	0.998002	0.96996	1.01197	0.994117	1.00975	1.02122	1.001	0.948949	0.986985	1	0.96358	0.997104	1.0203	0.972486	0.985112	0.980395
814	chr2	237286132	237813589	1.00662	0.997104	1.0141	1.00531	0.818403	1.03138	1.03521	1.04865	1.04896	0.997503	0.980395	1.0026	1.06588	0.994316	1.02041	1.0203	1.02583	1.02665	0.990446	0.981474	1.05169	1.07272	1.02143	0.979611	1.02511	0.997603	0.970154	1.02337	0.98334	1.05781	0.998002	0.96996	1.01197	0.994117	1.00975	1.02122	1.001	0.948949	0.986985	1	0.96358	0.997104	1.0203	0.972486	0.985112	0.980395
815	chr2	237813590	238314369	1.00662	0.997104	1.0141	1.00531	0.818403	1.03138	1.03521	1.04865	1.04896	0.997503	0.980395	1.0026	1.06588	0.994316	1.02041	1.0203	1.02583	1.02665	0.990446	0.981474	1.05169	1.07272	1.02143	0.979611	1.02511	0.997603	0.970154	1.02337	0.98334	1.05781	0.998002	0.96996	1.01197	0.994117	1.00975	1.02122	1.001	0.948949	0.986985	1	0.96358	0.997104	1.0203	0.972486	0.985112	0.980395
816	chr2	238314370	238823385	1.00662	0.997104	1.0141	1.00531	0.818403	1.03138	1.03521	1.04865	1.04896	0.997503	0.980395	1.0026	1.06588	0.994316	1.02041	1.0203	1.02583	1.02665	0.990446	0.981474	1.05169	1.07272	1.02143	0.979611	1.02511	0.997603	0.970154	1.02337	0.98334	1.05781	0.998002	0.96996	1.01197	0.994117	1.00975	1.02122	1.001	0.948949	0.986985	1	0.96358	0.997104	1.0203	0.972486	0.985112	0.980395
817	chr2	238823386	239387602	1.00662	0.997104	1.0141	1.00531	0.818403	1.03138	1.03521	1.04865	1.04896	0.997503	0.980395	1.0026	1.06588	0.994316	1.02041	1.0203	1.02583	1.02665	0.990446	0.981474	1.05169	1.07272	1.02143	0.979611	1.02511	0.997603	0.970154	1.02337	0.98334	1.05781	0.998002	0.96996	1.01197	0.994117	1.00975	1.02122	1.001	0.948949	0.986985	1	0.96358	0.997104	1.0203	0.972486	0.985112	0.980395
818	chr2	239387603	239938038	1.00662	0.997104	1.0141	1.00531	0.818403	1.03138	1.03521	1.04865	1.04896	0.997503	0.980395	1.0026	1.06588	0.994316	1.02041	1.0203	1.02583	1.02665	0.990446	0.981474	1.05169	1.07272	1.02143	0.979611	1.02511	0.997603	0.970154	1.02337	0.98334	1.05781	0.998002	0.96996	1.01197	0.994117	1.00975	1.02122	1.001	0.948949	0.986985	1	0.96358	0.997104	1.0203	0.972486	0.985112	0.980395
819	chr2	239938039	240435760	1.00662	0.997104	1.0141	1.00531	0.818403	1.03138	1.03521	1.04865	1.04896	0.997503	0.980395	1.0026	1.06588	0.994316	1.02041	1.0203	1.02583	1.02665	0.990446	0.981474	1.05169	1.07272	1.02143	0.979611	1.02511	0.997603	0.970154	1.02337	0.98334	1.05781	0.998002	0.96996	1.01197	0.994117	1.00975	1.02122	1.001	0.948949	0.986985	1	0.96358	0.997104	1.0203	0.972486	0.985112	0.980395
820	chr2	240435761	240977634	1.00662	0.997104	1.0141	1.00531	0.818403	1.03138	1.03521	1.04865	1.04896	0.997503	0.980395	1.0026	1.06588	0.994316	1.02041	1.0203	1.02583	1.02665	0.990446	0.981474	1.05169	1.07272	1.02143	0.979611	1.02511	0.997603	0.970154	1.02337	0.98334	1.05781	0.998002	0.96996	1.01197	0.994117	1.00975	1.02122	1.001	0.948949	0.986985	1	0.96358	0.997104	1.0203	0.972486	0.985112	0.980395
821	chr2	240977635	241524375	1.00662	0.997104	1.0141	1.00531	0.818403	1.03138	1.03521	1.04865	1.04896	0.997503	0.980395	1.0026	1.06588	0.994316	1.02041	1.0203	1.02583	1.02665	0.990446	0.981474	1.05169	1.07272	1.02143	0.979611	1.02511	0.997603	0.970154	1.02337	0.98334	1.05781	0.998002	0.96996	1.01197	0.994117	1.00975	1.02122	1.001	0.948949	0.986985	1	0.96358	0.997104	1.0203	0.972486	0.985112	0.980395
822	chr2	241524376	242067515	1.00662	0.997104	1.0141	1.00531	0.818403	1.03138	1.03521	1.04865	1.04896	0.997503	0.980395	1.0026	1.06588	0.994316	1.02041	1.0203	1.02583	1.02665	0.990446	0.981474	1.05169	1.07272	1.02143	0.979611	1.02511	0.997603	0.970154	1.02337	0.98334	1.05781	0.998002	0.96996	1.01197	0.994117	1.00975	1.02122	1.001	0.948949	0.986985	1	0.96358	0.997104	1.0203	0.972486	0.985112	0.980395
823	chr2	242067516	242612476	1.00662	0.997104	1.0141	1.00531	0.818403	1.03138	1.03521	1.04865	1.04896	0.997503	0.980395	1.0026	1.06588	0.994316	1.02041	1.0203	1.02583	1.02665	0.990446	0.981474	1.05169	1.07272	1.02143	0.979611	1.02511	0.997603	0.970154	1.02337	0.98334	1.05781	0.998002	0.96996	1.01197	0.994117	1.00975	1.02122	1.001	0.948949	0.986985	1	0.96358	0.997104	1.0203	0.972486	0.985112	0.980395
824	chr2	242612477	243199373	1.00662	0.997104	1.0141	1.00531	0.818403	1.03138	1.03521	1.04865	1.04896	0.997503	0.980395	1.0026	1.06588	0.994316	1.02041	1.0203	1.02583	1.02665	0.990446	0.981474	1.05169	1.07272	1.02143	0.979611	1.02511	0.997603	0.970154	1.02337	0.98334	1.05781	0.998002	0.96996	1.01197	0.994117	1.00975	1.02122	1.001	0.948949	0.986985	1	0.96358	0.997104	1.0203	0.972486	0.985112	0.980395
825	chr3	1	664580	1.01786	0.721156	1.03035	1.02963	1.01238	1.06759	1.00562	1.04791	1.02296	0.987479	0.992131	1.02409	0.991536	1.0024	1.003	1.02132	1.02439	1.06088	1.04477	0.9994	0.969476	0.969573	1.03087	1.03583	0.998301	1.02778	1.00541	1.01939	0.983439	0.995411	0.9992	1.01806	0.9991	0.98167	0.963869	1.03873	0.995709	1.00552	1.00864	0.994714	1.0024	1.0004	0.980199	0.969185	1.02071	1.03479
826	chr3	664581	1304247	1.01786	0.721156	1.03035	1.02963	1.01238	1.06759	1.00562	1.04791	1.02296	0.987479	0.992131	1.02409	0.991536	1.0024	1.003	1.02132	1.02439	1.06088	1.04477	0.9994	0.969476	0.969573	1.03087	1.03583	0.998301	1.02778	1.00541	1.01939	0.983439	0.995411	0.9992	1.01806	0.9991	0.98167	0.963869	1.03873	0.995709	1.00552	1.00864	0.994714	1.0024	1.0004	0.980199	0.969185	1.02071	1.03479
827	chr3	1304248	1944856	1.01786	0.721156	1.03035	1.02963	1.01238	1.06759	1.00562	1.04791	1.02296	0.987479	0.992131	1.02409	0.991536	1.0024	1.003	1.02132	1.02439	1.06088	1.04477	0.9994	0.969476	0.969573	1.03087	1.03583	0.998301	1.02778	1.00541	1.01939	0.983439	0.995411	0.9992	1.01806	0.9991	0.98167	0.963869	1.03873	0.995709	1.00552	1.00864	0.994714	1.0024	1.0004	0.980199	0.969185	1.02071	1.03479
828	chr3	1944857	2583251	1.01786	0.721156	1.03035	1.02963	1.01238	1.06759	1.00562	1.04791	1.02296	0.987479	0.992131	1.02409	0.991536	1.0024	1.003	1.02132	1.02439	1.06088	1.04477	0.9994	0.969476	0.969573	1.03087	1.03583	0.998301	1.02778	1.00541	1.01939	0.983439	0.995411	0.9992	1.01806	0.9991	0.98167	0.963869	1.03873	0.995709	1.00552	1.00864	0.994714	1.0024	1.0004	0.980199	0.969185	1.02071	1.03479
829	chr3	2583252	3163485	1.01786	1.26011	1.03035	1.02963	1.01238	1.06759	1.00562	1.04791	1.02296	0.987479	0.992131	1.02409	0.991536	1.0024	1.003	1.02132	1.02439	1.06088	1.04477	0.9994	0.969476	0.969573	1.03087	1.03583	0.998301	1.02778	1.00541	1.01939	0.983439	0.995411	0.9992	1.01806	0.9991	0.98167	0.963869	1.03873	0.995709	1.00552	1.00864	0.994714	1.0024	1.0004	0.980199	0.969185	1.02071	1.03479
830	chr3	3163486	3744260	1.01786	1.26011	1.03035	1.02963	1.01238	1.06759	1.00562	1.04791	1.02296	0.987479	0.992131	1.02409	0.991536	1.0024	1.003	1.02132	1.02439	1.06088	1.04477	0.9994	0.969476	0.969573	1.03087	1.03583	0.998301	1.02778	1.00541	1.01939	0.983439	0.995411	0.9992	1.01806	0.9991	0.98167	0.963869	1.03873	0.995709	1.00552	1.00864	0.994714	1.0024	1.0004	0.980199	0.969185	1.02071	1.03479
831	chr3	3744261	4364846	1.01786	1.26011	1.03035	1.02963	1.01238	1.06759	1.00562	1.04791	1.02296	0.987479	0.992131	1.02409	0.991536	1.0024	1.003	1.02132	1.02439	1.06088	1.04477	0.9994	0.969476	0.969573	1.03087	1.03583	0.998301	1.02778	1.00541	1.01939	0.983439	0.995411	0.9992	1.01806	0.9991	0.98167	0.963869	1.03873	0.995709	1.00552	1.00864	0.994714	1.0024	1.0004	0.980199	0.969185	1.02071	1.03479
832	chr3	4364847	4902871	1.01786	1.26011	1.03035	1.02963	1.01238	1.06759	1.00562	1.04791	1.02296	0.987479	0.992131	1.02409	0.991536	1.0024	1.003	1.02132	1.02439	1.06088	1.04477	0.9994	0.969476	0.969573	1.03087	1.03583	0.998301	1.02778	1.00541	1.01939	0.983439	0.995411	0.9992	1.01806	0.9991	0.98167	0.963869	1.03873	0.995709	1.00552	1.00864	0.994714	1.0024	1.0004	0.980199	0.969185	1.02071	1.03479
833	chr3	4902872	5474860	1.01786	1.26011	1.03035	1.02963	1.01238	1.06759	1.00562	1.04791	1.02296	0.987479	0.992131	1.02409	0.991536	1.0024	1.003	1.02132	1.02439	1.06088	1.04477	0.9994	0.969476	0.969573	1.03087	1.03583	0.998301	1.02778	1.00541	1.01939	0.983439	0.995411	0.9992	1.01806	0.9991	0.98167	0.963869	1.03873	0.995709	1.00552	1.00864	0.994714	1.0024	1.0004	0.980199	0.969185	1.02071	1.03479
834	chr3	5474861	6095681	1.01786	1.26011	1.03035	1.02963	1.01238	1.06759	1.00562	1.04791	1.02296	0.987479	0.992131	1.02409	0.991536	1.0024	1.003	1.02132	1.02439	1.06088	1.04477	0.9994	0.969476	0.969573	1.03087	1.03583	0.998301	1.02778	1.00541	1.01939	0.983439	0.995411	0.9992	1.01806	0.9991	0.98167	0.963869	1.03873	0.995709	1.00552	1.00864	0.994714	1.0024	1.0004	0.980199	0.969185	1.02071	1.03479
835	chr3	6095682	6747718	1.01786	1.26011	1.03035	1.02963	1.01238	1.06759	1.00562	1.04791	1.02296	0.987479	0.992131	1.02409	0.991536	1.0024	1.003	1.02132	1.02439	1.06088	1.04477	0.9994	0.969476	0.969573	1.03087	1.03583	0.998301	1.02778	1.00541	1.01939	0.983439	0.995411	0.9992	1.01806	0.9991	0.98167	0.963869	1.03873	0.995709	1.00552	1.00864	0.994714	1.0024	1.0004	0.980199	0.969185	1.02071	1.03479
836	chr3	6747719	7374319	1.01786	1.26011	1.03035	1.02963	1.01238	1.06759	1.00562	1.04791	1.02296	0.987479	0.992131	1.02409	0.991536	1.0024	1.003	1.02132	1.02439	1.06088	1.04477	0.9994	0.969476	0.969573	1.03087	1.03583	0.998301	1.02778	1.00541	1.01939	0.983439	0.995411	0.9992	1.01806	0.9991	0.98167	0.963869	1.03873	0.995709	1.00552	1.00864	0.994714	1.0024	1.0004	0.980199	0.969185	1.02071	1.03479
837	chr3	7374320	7969009	1.01786	1.26011	1.03035	1.02963	1.01238	1.06759	1.00562	1.04791	1.02296	0.987479	0.992131	1.02409	0.991536	1.0024	1.003	1.02132	1.02439	1.06088	1.04477	0.9994	0.969476	0.969573	1.03087	1.03583	0.998301	1.02778	1.00541	1.01939	0.983439	0.995411	0.9992	1.01806	0.9991	0.98167	0.963869	1.03873	0.995709	1.00552	1.00864	0.994714	1.0024	1.0004	0.980199	0.969185	1.02071	1.03479
838	chr3	7969010	8546789	1.01786	1.26011	1.03035	1.02963	1.01238	1.06759	1.00562	1.04791	1.02296	0.987479	0.992131	1.02409	0.991536	1.0024	1.003	1.02132	1.02439	1.06088	1.04477	0.9994	0.969476	0.969573	1.03087	1.03583	0.998301	1.02778	1.00541	1.01939	0.983439	0.995411	0.9992	1.01806	0.9991	0.98167	0.963869	1.03873	0.995709	1.00552	1.00864	0.994714	1.0024	1.0004	0.980199	0.969185	1.02071	1.03479
839	chr3	8546790	9067456	1.01786	1.26011	1.03035	1.02963	1.01238	1.06759	1.00562	1.04791	1.02296	0.987479	0.992131	1.02409	0.991536	1.0024	1.003	1.02132	1.02439	1.06088	1.04477	0.9994	0.969476	0.969573	1.03087	1.03583	0.998301	1.02778	1.00541	1.01939	0.983439	0.995411	0.9992	1.01806	0.9991	0.98167	0.963869	1.03873	0.995709	1.00552	1.00864	0.994714	1.0024	1.0004	0.980199	0.969185	1.02071	1.03479
840	chr3	9067457	9612225	1.01786	1.26011	1.03035	1.02963	1.01238	1.06759	1.00562	1.04791	1.02296	0.987479	0.992131	1.02409	0.991536	1.0024	1.003	1.02132	1.02439	1.06088	1.04477	0.9994	0.969476	0.969573	1.03087	1.03583	0.998301	1.02778	1.00541	1.01939	0.983439	0.995411	0.9992	1.01806	0.9991	0.98167	0.963869	1.03873	0.995709	1.00552	1.00864	0.994714	1.0024	1.0004	0.980199	0.969185	1.02071	1.03479
841	chr3	9612226	10156806	1.01786	1.26011	1.03035	1.02963	1.01238	1.06759	1.00562	1.04791	1.02296	0.987479	0.992131	1.02409	0.991536	1.0024	1.003	1.02132	1.02439	1.06088	1.04477	0.9994	0.969476	0.969573	1.03087	1.03583	0.998301	1.02778	1.00541	1.01939	0.983439	0.995411	0.9992	1.01806	0.9991	0.98167	0.963869	1.03873	0.995709	1.00552	1.00864	0.994714	1.0024	1.0004	0.980199	0.969185	1.02071	1.03479
842	chr3	10156807	10660631	1.01786	1.26011	1.03035	1.02963	1.01238	1.06759	1.00562	1.04791	1.02296	0.987479	0.992131	1.02409	0.991536	1.0024	1.003	1.02132	1.02439	1.06088	1.04477	0.9994	0.969476	0.969573	1.03087	1.03583	0.998301	1.02778	1.00541	1.01939	0.983439	0.995411	0.9992	1.01806	0.9991	0.98167	0.963869	1.03873	0.995709	1.00552	1.00864	0.994714	1.0024	1.0004	0.980199	0.969185	1.02071	1.03479
843	chr3	10660632	11160883	1.01786	1.26011	1.03035	1.02963	1.01238	1.06759	1.00562	1.04791	1.02296	0.987479	0.992131	1.02409	0.991536	1.0024	1.003	1.02132	1.02439	1.06088	1.04477	0.9994	0.969476	0.969573	1.03087	1.03583	0.998301	1.02778	1.00541	1.01939	0.983439	0.995411	0.9992	1.01806	0.9991	0.98167	0.963869	1.03873	0.995709	1.00552	1.00864	0.994714	1.0024	1.0004	0.980199	0.969185	1.02071	1.03479
844	chr3	11160884	11701272	1.01786	1.26011	1.03035	1.02963	1.01238	1.06759	1.00562	1.04791	1.02296	0.987479	0.992131	1.02409	0.991536	1.0024	1.003	1.02132	1.02439	1.06088	1.04477	0.9994	0.969476	0.969573	1.03087	1.03583	0.998301	1.02778	1.00541	1.01939	0.983439	0.995411	0.9992	1.01806	0.9991	0.98167	0.963869	1.03873	0.995709	1.00552	1.00864	0.994714	1.0024	1.0004	0.980199	0.969185	1.02071	1.03479
845	chr3	11701273	12267874	1.01786	1.26011	1.03035	1.02963	1.01238	1.06759	1.00562	1.04791	1.02296	0.987479	0.992131	1.02409	0.991536	1.0024	1.003	1.02132	1.02439	1.06088	1.04477	0.9994	0.969476	0.969573	1.03087	1.03583	0.998301	1.02778	1.00541	1.01939	0.983439	0.995411	0.9992	1.01806	0.9991	0.98167	0.963869	1.03873	0.995709	1.00552	1.00864	0.994714	1.0024	1.0004	0.980199	0.969185	1.02071	1.03479
846	chr3	12267875	12824690	1.01786	1.26011	1.03035	1.02963	1.01238	1.06759	1.00562	1.04791	1.02296	0.987479	0.992131	1.02409	0.991536	1.0024	1.003	1.02132	1.02439	1.06088	1.04477	0.9994	0.969476	0.969573	1.03087	1.03583	0.998301	1.02778	1.00541	1.01939	0.983439	0.995411	0.9992	1.01806	0.9991	0.98167	0.963869	1.03873	0.995709	1.00552	1.00864	0.994714	1.0024	1.0004	0.980199	0.969185	1.02071	1.03479
847	chr3	12824691	13329740	1.01786	1.26011	1.03035	1.02963	1.01238	1.06759	1.00562	1.04791	1.02296	0.987479	0.992131	1.02409	0.991536	1.0024	1.003	1.02132	1.02439	1.06088	1.04477	0.9994	0.969476	0.969573	1.03087	1.03583	0.998301	1.02778	1.00541	1.01939	0.983439	0.995411	0.9992	1.01806	0.9991	0.98167	0.963869	1.03873	0.995709	1.00552	1.00864	0.994714	1.0024	1.0004	0.980199	0.969185	1.02071	1.03479
848	chr3	13329741	13841545	1.01786	0.64869	1.03035	1.02963	1.01238	1.06759	1.00562	1.04791	1.02296	0.987479	0.992131	1.02409	0.991536	1.0024	1.003	1.02132	1.02439	1.06088	1.04477	0.9994	0.969476	0.969573	1.03087	1.03583	0.998301	1.02778	1.00541	1.01939	0.983439	0.995411	0.9992	1.01806	0.9991	0.98167	0.963869	1.03873	0.995709	1.00552	1.00864	0.994714	1.0024	1.0004	0.980199	0.969185	1.02071	1.03479
849	chr3	13841546	14388560	1.01786	0.64869	1.03035	1.02963	1.01238	1.06759	1.00562	1.04791	1.02296	0.987479	0.992131	1.02409	0.991536	1.0024	1.003	1.02132	1.02439	1.06088	1.04477	0.9994	0.969476	0.969573	1.03087	1.03583	0.998301	1.02778	1.00541	1.01939	0.983439	0.995411	0.9992	1.01806	0.9991	0.98167	0.963869	1.03873	0.995709	1.00552	1.00864	0.994714	1.0024	1.0004	0.980199	0.969185	1.02071	1.03479
850	chr3	14388561	14888348	1.01786	0.64869	1.03035	1.02963	1.01238	1.06759	1.00562	1.04791	1.02296	0.987479	0.992131	1.02409	0.991536	1.0024	1.003	1.02132	1.02439	1.06088	1.04477	0.9994	0.969476	0.969573	1.03087	1.03583	0.998301	1.02778	1.00541	1.01939	0.983439	0.995411	0.9992	1.01806	0.9991	0.98167	0.963869	1.03873	0.995709	1.00552	1.00864	0.994714	1.0024	1.0004	0.980199	0.969185	1.02071	1.03479
851	chr3	14888349	15420259	1.01786	0.64869	1.03035	1.02963	1.01238	1.06759	1.00562	1.04791	1.02296	0.987479	0.992131	1.02409	0.991536	1.0024	1.003	1.02132	1.02439	1.06088	1.04477	0.9994	0.969476	0.969573	1.03087	1.03583	0.998301	1.02778	1.00541	1.01939	0.983439	0.995411	0.9992	1.01806	0.9991	0.98167	0.963869	1.03873	0.995709	1.00552	1.00864	0.994714	1.0024	1.0004	0.980199	0.969185	1.02071	1.03479
852	chr3	15420260	15973454	1.01786	0.64869	1.03035	1.02963	1.01238	1.06759	1.00562	1.04791	1.02296	0.987479	0.992131	1.02409	0.991536	1.0024	1.003	1.02132	1.02439	1.06088	1.04477	0.9994	0.969476	0.969573	1.03087	1.03583	0.998301	1.02778	1.00541	1.01939	0.983439	0.995411	0.9992	1.01806	0.9991	0.98167	0.963869	1.03873	0.995709	1.00552	1.00864	0.994714	1.0024	1.0004	0.980199	0.969185	1.02071	1.03479
853	chr3	15973455	16482719	1.01786	0.64869	1.03035	1.02963	1.01238	1.06759	1.00562	1.04791	1.02296	0.987479	0.992131	1.02409	0.991536	1.0024	1.003	1.02132	1.02439	1.06088	1.04477	0.9994	0.969476	0.969573	1.03087	1.03583	0.998301	1.02778	1.00541	1.01939	0.983439	0.995411	0.9992	1.01806	0.9991	0.98167	0.963869	1.03873	0.995709	1.00552	1.00864	0.994714	1.0024	1.0004	0.980199	0.969185	1.02071	1.03479
854	chr3	16482720	17033660	1.01786	0.64869	1.03035	1.02963	1.01238	1.06759	1.00562	1.04791	1.02296	0.987479	0.992131	1.02409	0.991536	1.0024	1.003	1.02132	1.02439	1.06088	1.04477	0.9994	0.969476	0.969573	1.03087	1.03583	0.998301	1.02778	1.00541	1.01939	0.983439	0.995411	0.9992	1.01806	0.9991	0.98167	0.963869	1.03873	0.995709	1.00552	1.00864	0.994714	1.0024	1.0004	0.980199	0.969185	1.02071	1.03479
855	chr3	17033661	17612527	1.01786	0.64869	1.03035	1.02963	1.01238	1.06759	1.00562	1.04791	1.02296	0.987479	0.992131	1.02409	0.991536	1.0024	1.003	1.02132	1.02439	1.06088	1.04477	0.9994	0.969476	0.969573	1.03087	1.03583	0.998301	1.02778	1.00541	1.01939	0.983439	0.995411	0.9992	1.01806	0.9991	0.98167	0.963869	1.03873	0.995709	1.00552	1.00864	0.994714	1.0024	1.0004	0.980199	0.969185	1.02071	1.03479
856	chr3	17612528	18199498	1.01786	0.64869	1.03035	1.02963	1.01238	1.06759	1.00562	1.04791	1.02296	0.987479	0.992131	1.02409	0.991536	1.0024	1.003	1.02132	1.02439	1.06088	1.04477	0.9994	0.969476	0.969573	1.03087	1.03583	0.998301	1.02778	1.00541	1.01939	0.983439	0.995411	0.9992	1.01806	0.9991	0.98167	0.963869	1.03873	0.995709	1.00552	1.00864	0.994714	1.0024	1.0004	0.980199	0.969185	1.02071	1.03479
857	chr3	18199499	18769694	1.01786	0.64869	1.03035	1.02963	1.01238	1.06759	1.00562	1.04791	1.02296	0.987479	0.992131	1.02409	0.991536	1.0024	1.003	1.02132	1.02439	1.06088	1.04477	0.9994	0.969476	0.969573	1.03087	1.03583	0.998301	1.02778	1.00541	1.01939	0.983439	0.995411	0.9992	1.01806	0.9991	0.98167	0.963869	1.03873	0.995709	1.00552	1.00864	0.994714	1.0024	1.0004	0.980199	0.969185	1.02071	1.03479
858	chr3	18769695	19404742	1.01786	0.64869	1.03035	1.02963	1.01238	1.06759	1.00562	1.04791	1.02296	0.987479	0.992131	1.02409	0.991536	1.0024	1.003	1.02132	1.02439	1.06088	1.04477	0.9994	0.969476	0.969573	1.03087	1.03583	0.998301	1.02778	1.00541	1.01939	0.983439	0.995411	0.9992	1.01806	0.9991	0.98167	0.963869	1.03873	0.995709	1.00552	1.00864	0.994714	1.0024	1.0004	0.980199	0.969185	1.02071	1.03479
859	chr3	19404743	20054714	1.01786	0.64869	1.03035	1.02963	1.01238	1.06759	1.00562	1.04791	1.02296	0.987479	0.992131	1.02409	0.991536	1.0024	1.003	1.02132	1.02439	1.06088	1.04477	0.9994	0.969476	0.969573	1.03087	1.03583	0.998301	1.02778	1.00541	1.01939	0.983439	0.995411	0.9992	1.01806	0.9991	0.98167	0.963869	1.03873	0.995709	1.00552	1.00864	0.994714	1.0024	1.0004	0.980199	0.969185	1.02071	1.03479
860	chr3	20054715	20656821	1.01786	0.64869	1.03035	1.02963	1.01238	1.06759	1.00562	1.04791	1.02296	0.987479	0.992131	1.02409	0.991536	1.0024	1.003	1.02132	1.02439	1.06088	1.04477	0.9994	0.969476	0.969573	1.03087	1.03583	0.998301	1.02778	1.00541	1.01939	0.983439	0.995411	0.9992	1.01806	0.9991	0.98167	0.963869	1.03873	0.995709	1.00552	1.00864	0.994714	1.0024	1.0004	0.980199	0.969185	1.02071	1.03479
861	chr3	20656822	21281199	1.01786	0.64869	1.03035	1.02963	1.01238	1.06759	1.00562	1.04791	1.02296	0.987479	0.992131	1.02409	0.991536	1.0024	1.003	1.02132	1.02439	1.06088	1.04477	0.9994	0.969476	0.969573	1.03087	1.03583	0.998301	1.02778	1.00541	1.01939	0.983439	0.995411	0.9992	1.01806	0.9991	0.98167	0.963869	1.03873	0.995709	1.00552	1.00864	0.994714	1.0024	1.0004	0.980199	0.969185	1.02071	1.03479
862	chr3	21281200	21873979	1.01786	0.64869	1.03035	1.02963	1.01238	1.06759	1.00562	1.04791	1.02296	0.987479	0.992131	1.02409	0.991536	1.0024	1.003	1.02132	1.02439	1.06088	1.04477	0.9994	0.969476	0.969573	1.03087	1.03583	0.998301	1.02778	1.00541	1.01939	0.983439	0.995411	0.9992	1.01806	0.9991	0.98167	0.963869	1.03873	0.995709	1.00552	1.00864	0.994714	1.0024	1.0004	0.980199	0.969185	1.02071	1.03479
863	chr3	21873980	22486457	1.01786	1.26947	1.03035	1.02963	1.01238	1.06759	1.00562	1.04791	1.02296	0.987479	0.992131	1.02409	0.991536	1.0024	1.003	1.02132	1.02439	1.06088	1.04477	0.9994	0.969476	0.969573	1.03087	1.03583	0.998301	1.02778	1.00541	1.01939	0.983439	0.995411	0.9992	1.01806	0.9991	0.98167	0.963869	1.03873	0.995709	1.00552	1.00864	0.994714	1.0024	1.0004	0.980199	0.969185	1.02071	1.03479
864	chr3	22486458	23112838	1.01786	1.26947	1.03035	1.02963	1.01238	1.06759	1.00562	1.04791	1.02296	0.987479	0.992131	1.02409	0.991536	1.0024	1.003	1.02132	1.02439	1.06088	1.04477	0.9994	0.969476	0.969573	1.03087	1.03583	0.998301	1.02778	1.00541	1.01939	0.983439	0.995411	0.9992	1.01806	0.9991	0.98167	0.963869	1.03873	0.995709	1.00552	1.00864	0.994714	1.0024	1.0004	0.980199	0.969185	1.02071	1.03479
865	chr3	23112839	23689971	1.01786	1.26947	1.03035	1.02963	1.01238	1.06759	1.00562	1.04791	1.02296	0.987479	0.992131	1.02409	0.991536	1.0024	1.003	1.02132	1.02439	1.06088	1.04477	0.9994	0.969476	0.969573	1.03087	1.03583	0.998301	1.02778	1.00541	1.01939	0.983439	0.995411	0.9992	1.01806	0.9991	0.98167	0.963869	1.03873	0.995709	1.00552	1.00864	0.994714	1.0024	1.0004	0.980199	0.969185	1.02071	1.03479
866	chr3	23689972	24242283	1.01786	1.26947	1.03035	1.02963	1.01238	1.06759	1.00562	1.04791	1.02296	0.987479	0.992131	1.02409	0.991536	1.0024	1.003	1.02132	1.02439	1.06088	1.04477	0.9994	0.969476	0.969573	1.03087	1.03583	0.998301	1.02778	1.00541	1.01939	0.983439	0.995411	0.9992	1.01806	0.9991	0.98167	0.963869	1.03873	0.995709	1.00552	1.00864	0.994714	1.0024	1.0004	0.980199	0.969185	1.02071	1.03479
867	chr3	24242284	24803087	1.01786	1.26947	1.03035	1.02963	1.01238	1.06759	1.00562	1.04791	1.02296	0.987479	0.992131	1.02409	0.991536	1.0024	1.003	1.02132	1.02439	1.06088	1.04477	0.9994	0.969476	0.969573	1.03087	1.03583	0.998301	1.02778	1.00541	1.01939	0.983439	0.995411	0.9992	1.01806	0.9991	0.98167	0.963869	1.03873	0.995709	1.00552	1.00864	0.994714	1.0024	1.0004	0.980199	0.969185	1.02071	1.03479
868	chr3	24803088	25384262	1.01786	1.26947	1.03035	1.02963	1.01238	1.06759	1.00562	1.04791	1.02296	0.987479	0.992131	1.02409	0.991536	1.0024	1.003	1.02132	1.02439	1.06088	1.04477	0.9994	0.969476	0.969573	1.03087	1.03583	0.998301	1.02778	1.00541	1.01939	0.983439	0.995411	0.9992	1.01806	0.9991	0.98167	0.963869	1.03873	0.995709	1.00552	1.00864	0.994714	1.0024	1.0004	0.980199	0.969185	1.02071	1.03479
869	chr3	25384263	25919453	1.01786	0.546839	1.03035	1.02963	1.01238	1.06759	1.00562	1.04791	1.02296	0.987479	0.992131	1.02409	0.991536	1.0024	1.003	1.02132	1.02439	1.06088	1.04477	0.9994	0.969476	0.969573	1.03087	1.03583	0.998301	1.02778	1.00541	1.01939	0.983439	0.995411	0.9992	1.01806	0.9991	0.98167	0.963869	1.03873	0.995709	1.00552	1.00864	0.994714	1.0024	1.0004	0.980199	0.969185	1.02071	1.03479
870	chr3	25919454	26522699	1.01786	0.546839	1.03035	1.02963	1.01238	1.06759	1.00562	1.04791	1.02296	0.987479	0.992131	1.02409	0.991536	1.0024	1.003	1.02132	1.02439	1.06088	1.04477	0.9994	0.969476	0.969573	1.03087	1.03583	0.998301	1.02778	1.00541	1.01939	0.983439	0.995411	0.9992	1.01806	0.9991	0.98167	0.963869	1.03873	0.995709	1.00552	1.00864	0.994714	1.0024	1.0004	0.980199	0.969185	1.02071	1.03479
871	chr3	26522700	27126398	1.01786	0.546839	1.03035	1.02963	1.01238	1.06759	1.00562	1.04791	1.02296	0.987479	0.992131	1.02409	0.991536	1.0024	1.003	1.02132	1.02439	1.06088	1.04477	0.9994	0.969476	0.969573	1.03087	1.03583	0.998301	1.02778	1.00541	1.01939	0.983439	0.995411	0.9992	1.01806	0.9991	0.98167	0.963869	1.03873	0.995709	1.00552	1.00864	0.994714	1.0024	1.0004	0.980199	0.969185	1.02071	1.03479
872	chr3	27126399	27702608	1.01786	1.15223	1.03035	1.02963	1.01238	1.06759	1.00562	1.04791	1.02296	0.987479	0.992131	1.02409	0.991536	1.0024	1.003	1.02132	1.02439	1.06088	1.04477	0.9994	0.969476	0.969573	1.03087	1.03583	0.998301	1.02778	1.00541	1.01939	0.983439	0.995411	0.9992	1.01806	0.9991	0.98167	0.963869	1.03873	0.995709	1.00552	1.00864	0.994714	1.0024	1.0004	0.980199	0.969185	1.02071	1.03479
873	chr3	27702609	28309106	1.01786	1.15223	1.03035	1.02963	1.01238	1.06759	1.00562	1.04791	1.02296	0.987479	0.992131	1.02409	0.991536	1.0024	1.003	1.02132	1.02439	1.06088	1.04477	0.9994	0.969476	0.969573	1.03087	1.03583	0.998301	1.02778	1.00541	1.01939	0.983439	0.995411	0.9992	1.01806	0.9991	0.98167	0.963869	1.03873	0.995709	1.00552	1.00864	0.994714	1.0024	1.0004	0.980199	0.969185	1.02071	1.03479
874	chr3	28309107	28896702	1.01786	1.15223	1.03035	1.02963	1.01238	1.06759	1.00562	1.04791	1.02296	0.987479	0.992131	1.02409	0.991536	1.0024	1.003	1.02132	1.02439	1.06088	1.04477	0.9994	0.969476	0.969573	1.03087	1.03583	0.998301	1.02778	1.00541	1.01939	0.983439	0.995411	0.9992	1.01806	0.9991	0.98167	0.963869	1.03873	0.995709	1.00552	1.00864	0.994714	1.0024	1.0004	0.980199	0.969185	1.02071	1.03479
875	chr3	28896703	29459724	1.01786	1.15223	1.03035	1.02963	1.01238	1.06759	1.00562	1.04791	1.02296	0.987479	0.992131	1.02409	0.991536	1.0024	1.003	1.02132	1.02439	1.06088	1.04477	0.9994	0.969476	0.969573	1.03087	1.03583	0.998301	1.02778	1.00541	1.01939	0.983439	0.995411	0.9992	1.01806	0.9991	0.98167	0.963869	1.03873	0.995709	1.00552	1.00864	0.994714	1.0024	1.0004	0.980199	0.969185	1.02071	1.03479
876	chr3	29459725	30048496	1.01786	1.15223	1.03035	1.02963	1.01238	1.06759	1.00562	1.04791	1.02296	0.987479	0.992131	1.02409	0.991536	1.0024	1.003	1.02132	1.02439	1.06088	1.04477	0.9994	0.969476	0.969573	1.03087	1.03583	0.998301	1.02778	1.00541	1.01939	0.983439	0.995411	0.9992	1.01806	0.9991	0.98167	0.963869	1.03873	0.995709	1.00552	1.00864	0.994714	1.0024	1.0004	0.980199	0.969185	1.02071	1.03479
877	chr3	30048497	30618875	1.01786	1.15223	1.03035	1.02963	1.01238	1.06759	1.00562	1.04791	1.02296	0.987479	0.992131	1.02409	0.991536	1.0024	1.003	1.02132	1.02439	1.06088	1.04477	0.9994	0.969476	0.969573	1.03087	1.03583	0.998301	1.02778	1.00541	1.01939	0.983439	0.995411	0.9992	1.01806	0.9991	0.98167	0.963869	1.03873	0.995709	1.00552	1.00864	0.994714	1.0024	1.0004	0.980199	0.969185	1.02071	1.03479
878	chr3	30618876	31160569	1.01786	1.15223	1.03035	1.02963	1.01238	1.06759	1.00562	1.04791	1.02296	0.987479	0.992131	1.02409	0.991536	1.0024	1.003	1.02132	1.02439	1.06088	1.04477	0.9994	0.969476	0.969573	1.03087	1.03583	0.998301	1.02778	1.00541	1.01939	0.983439	0.995411	0.9992	1.01806	0.9991	0.98167	0.963869	1.03873	0.995709	1.00552	1.00864	0.994714	1.0024	1.0004	0.980199	0.969185	1.02071	1.03479
879	chr3	31160570	31715065	1.01786	1.15223	1.03035	1.02963	1.01238	1.06759	1.00562	1.04791	1.02296	0.987479	0.992131	1.02409	0.991536	1.0024	1.003	1.02132	1.02439	1.06088	1.04477	0.9994	0.969476	0.969573	1.03087	1.03583	0.998301	1.02778	1.00541	1.01939	0.983439	0.995411	0.9992	1.01806	0.9991	0.98167	0.963869	1.03873	0.995709	1.00552	1.00864	0.994714	1.0024	1.0004	0.980199	0.969185	1.02071	1.03479
880	chr3	31715066	32283210	1.01786	1.15223	1.03035	1.02963	1.01238	1.06759	1.00562	1.04791	1.02296	0.987479	0.992131	1.02409	0.991536	1.0024	1.003	1.02132	1.02439	1.06088	1.04477	0.9994	0.969476	0.969573	1.03087	1.03583	0.998301	1.02778	1.00541	1.01939	0.983439	0.995411	0.9992	1.01806	0.9991	0.98167	0.963869	1.03873	0.995709	1.00552	1.00864	0.994714	1.0024	1.0004	0.980199	0.969185	1.02071	1.03479
881	chr3	32283211	32860997	1.01786	1.15223	1.03035	1.02963	1.01238	1.06759	1.00562	1.04791	1.02296	0.987479	0.992131	1.02409	0.991536	1.0024	1.003	1.02132	1.02439	1.06088	1.04477	0.9994	0.969476	0.969573	1.03087	1.03583	0.998301	1.02778	1.00541	1.01939	0.983439	0.995411	0.9992	1.01806	0.9991	0.98167	0.963869	1.03873	0.995709	1.00552	1.00864	0.994714	1.0024	1.0004	0.980199	0.969185	1.02071	1.03479
882	chr3	32860998	33436127	1.01786	1.15223	1.03035	1.02963	1.01238	1.06759	1.00562	1.04791	1.02296	0.987479	0.992131	1.02409	0.991536	1.0024	1.003	1.02132	1.02439	1.06088	1.04477	0.9994	0.969476	0.969573	1.03087	1.03583	0.998301	1.02778	1.00541	1.01939	0.983439	0.995411	0.9992	1.01806	0.9991	0.98167	0.963869	1.03873	0.995709	1.00552	1.00864	0.994714	1.0024	1.0004	0.980199	0.969185	1.02071	1.03479
883	chr3	33436128	34031680	1.01786	1.15223	1.03035	1.02963	1.01238	1.06759	1.00562	1.04791	1.02296	0.987479	0.992131	1.02409	0.991536	1.0024	1.003	1.02132	1.02439	1.06088	1.04477	0.9994	0.969476	0.969573	1.03087	1.03583	0.998301	1.02778	1.00541	1.01939	0.983439	0.995411	0.9992	1.01806	0.9991	0.98167	0.963869	1.03873	0.995709	1.00552	1.00864	0.994714	1.0024	1.0004	0.980199	0.969185	1.02071	1.03479
884	chr3	34031681	34615225	1.01786	1.15223	1.03035	1.02963	1.01238	1.06759	1.00562	1.04791	1.02296	0.987479	0.992131	1.02409	0.991536	1.0024	1.003	1.02132	1.02439	1.06088	1.04477	0.9994	0.969476	0.969573	1.03087	1.03583	0.998301	1.02778	1.00541	1.01939	0.983439	0.995411	0.9992	1.01806	0.9991	0.98167	0.963869	1.03873	0.995709	1.00552	1.00864	0.994714	1.0024	1.0004	0.980199	0.969185	1.02071	1.03479
885	chr3	34615226	35261961	1.01786	1.15223	1.03035	1.02963	1.01238	1.06759	1.00562	1.04791	1.02296	0.987479	0.992131	1.02409	0.991536	1.0024	1.003	1.02132	1.02439	1.06088	1.04477	0.9994	0.969476	0.969573	1.03087	1.03583	0.998301	1.02778	1.00541	1.01939	0.983439	0.995411	0.9992	1.01806	0.9991	0.98167	0.963869	1.03873	0.995709	1.00552	1.00864	0.994714	1.0024	1.0004	0.980199	0.969185	1.02071	1.03479
886	chr3	35261962	35898526	1.01786	1.15223	1.03035	1.02963	1.01238	1.06759	1.00562	1.04791	1.02296	0.987479	0.992131	1.02409	0.991536	1.0024	1.003	1.02132	1.02439	1.06088	1.04477	0.9994	0.969476	0.969573	1.03087	1.03583	0.998301	1.02778	1.00541	1.01939	0.983439	0.995411	0.9992	1.01806	0.9991	0.98167	0.963869	1.03873	0.995709	1.00552	1.00864	0.994714	1.0024	1.0004	0.980199	0.969185	1.02071	1.03479
887	chr3	35898527	36503142	1.01786	1.15223	1.03035	1.02963	1.01238	1.06759	1.00562	1.04791	1.02296	0.987479	0.992131	1.02409	0.991536	1.0024	1.003	1.02132	1.02439	1.06088	1.04477	0.9994	0.969476	0.969573	1.03087	1.03583	0.998301	1.02778	1.00541	1.01939	0.983439	0.995411	0.9992	1.01806	0.9991	0.98167	0.963869	1.03873	0.995709	1.00552	1.00864	0.994714	1.0024	1.0004	0.980199	0.969185	1.02071	1.03479
888	chr3	36503143	37064668	1.01786	1.15223	1.03035	1.02963	1.01238	1.06759	1.00562	1.04791	1.02296	0.987479	0.992131	1.02409	0.991536	1.0024	1.003	1.02132	1.02439	1.06088	1.04477	0.9994	0.969476	0.969573	1.03087	1.03583	0.998301	1.02778	1.00541	1.01939	0.983439	0.995411	0.9992	1.01806	0.9991	0.98167	0.963869	1.03873	0.995709	1.00552	1.00864	0.994714	1.0024	1.0004	0.980199	0.969185	1.02071	1.03479
889	chr3	37064669	37616422	1.01786	1.15223	1.03035	1.02963	1.01238	1.06759	1.00562	1.04791	1.02296	0.987479	0.992131	1.02409	0.991536	1.0024	1.003	1.02132	1.02439	1.06088	1.04477	0.9994	0.969476	0.969573	1.03087	1.03583	0.998301	1.02778	1.00541	1.01939	0.983439	0.995411	0.9992	1.01806	0.9991	0.98167	0.963869	1.03873	0.995709	1.00552	1.00864	0.994714	1.0024	1.0004	0.980199	0.969185	1.02071	1.03479
890	chr3	37616423	38137754	1.01786	1.15223	1.03035	1.02963	1.01238	1.06759	1.00562	1.04791	1.02296	0.987479	0.992131	1.02409	0.991536	1.0024	1.003	1.02132	1.02439	1.06088	1.04477	0.9994	0.969476	0.969573	1.03087	1.03583	0.998301	1.02778	1.00541	1.01939	0.983439	0.995411	0.9992	1.01806	0.9991	0.98167	0.963869	1.03873	0.995709	1.00552	1.00864	0.994714	1.0024	1.0004	0.980199	0.969185	1.02071	1.03479
891	chr3	38137755	38666093	1.01786	1.15223	1.03035	1.02963	1.01238	1.06759	1.00562	1.04791	1.02296	0.987479	0.992131	1.02409	0.991536	1.0024	1.003	1.02132	1.02439	1.06088	1.04477	0.9994	0.969476	0.969573	1.03087	1.03583	0.998301	1.02778	1.00541	1.01939	0.983439	0.995411	0.9992	1.01806	0.9991	0.98167	0.963869	1.03873	0.995709	1.00552	1.00864	0.994714	1.0024	1.0004	0.980199	0.969185	1.02071	1.03479
892	chr3	38666094	39209937	1.01786	1.15223	1.03035	1.02963	1.01238	1.06759	1.00562	1.04791	1.02296	0.987479	0.992131	1.02409	0.991536	1.0024	1.003	1.02132	1.02439	1.06088	1.04477	0.9994	0.969476	0.969573	1.03087	1.03583	0.998301	1.02778	1.00541	1.01939	0.983439	0.995411	0.9992	1.01806	0.9991	0.98167	0.963869	1.03873	0.995709	1.00552	1.00864	0.994714	1.0024	1.0004	0.980199	0.969185	1.02071	1.03479
893	chr3	39209938	39808083	1.01786	1.15223	1.03035	1.02963	1.01238	1.06759	1.00562	1.04791	1.02296	0.987479	0.992131	1.02409	0.991536	1.0024	1.003	1.02132	1.02439	1.06088	1.04477	0.9994	0.969476	0.969573	1.03087	1.03583	0.998301	1.02778	1.00541	1.01939	0.983439	0.995411	0.9992	1.01806	0.9991	0.98167	0.963869	1.03873	0.995709	1.00552	1.00864	0.994714	1.0024	1.0004	0.980199	0.969185	1.02071	1.03479
894	chr3	39808084	40389384	1.01786	1.15223	1.03035	1.02963	1.01238	1.06759	1.00562	1.04791	1.02296	0.987479	0.992131	1.02409	0.991536	1.0024	1.003	1.02132	1.02439	1.06088	1.04477	0.9994	0.969476	0.969573	1.03087	1.03583	0.998301	1.02778	1.00541	1.01939	0.983439	0.995411	0.9992	1.01806	0.9991	0.98167	0.963869	1.03873	0.995709	1.00552	1.00864	0.994714	1.0024	1.0004	0.980199	0.969185	1.02071	1.03479
895	chr3	40389385	40927082	1.01786	1.15223	1.03035	1.02963	1.01238	1.06759	1.00562	1.04791	1.02296	0.987479	0.992131	1.02409	0.991536	1.0024	1.003	1.02132	1.02439	1.06088	1.04477	0.9994	0.969476	0.969573	1.03087	1.03583	0.998301	1.02778	1.00541	1.01939	0.983439	0.995411	0.9992	1.01806	0.9991	0.98167	0.963869	1.03873	0.995709	1.00552	1.00864	0.994714	1.0024	1.0004	0.980199	0.969185	1.02071	1.03479
896	chr3	40927083	41473589	1.01786	1.15223	1.03035	1.02963	1.01238	1.06759	1.00562	1.04791	1.02296	0.987479	0.992131	1.02409	0.991536	1.0024	1.003	1.02132	1.02439	1.06088	1.04477	0.9994	0.969476	0.969573	1.03087	1.03583	0.998301	1.02778	1.00541	1.01939	0.983439	0.995411	0.9992	1.01806	0.9991	0.98167	0.963869	1.03873	0.995709	1.00552	1.00864	0.994714	1.0024	1.0004	0.980199	0.969185	1.02071	1.03479
897	chr3	41473590	42083973	1.01786	1.15223	1.03035	1.02963	1.01238	1.06759	1.00562	1.04791	1.02296	0.987479	0.992131	1.02409	0.991536	1.0024	1.003	1.02132	1.02439	1.06088	1.04477	0.9994	0.969476	0.969573	1.03087	1.03583	0.998301	1.02778	1.00541	1.01939	0.983439	0.995411	0.9992	1.01806	0.9991	0.98167	0.963869	1.03873	0.995709	1.00552	1.00864	0.994714	1.0024	1.0004	0.980199	0.969185	1.02071	1.03479
898	chr3	42083974	42606346	1.01786	1.15223	1.03035	1.02963	1.01238	1.06759	1.00562	1.04791	1.02296	0.987479	0.992131	1.02409	0.991536	1.0024	1.003	1.02132	1.02439	1.06088	1.04477	0.9994	0.969476	0.969573	1.03087	1.03583	0.998301	1.02778	1.00541	1.01939	0.983439	0.995411	0.9992	1.01806	0.9991	0.98167	0.963869	1.03873	0.995709	1.00552	1.00864	0.994714	1.0024	1.0004	0.980199	0.969185	1.02071	1.03479
899	chr3	42606347	43163349	1.01786	1.15223	1.03035	1.02963	1.01238	1.06759	1.00562	1.04791	1.02296	0.987479	0.992131	1.02409	0.991536	1.0024	1.003	1.02132	1.02439	1.06088	1.04477	0.9994	0.969476	0.969573	1.03087	1.03583	0.998301	1.02778	1.00541	1.01939	0.983439	0.995411	0.9992	1.01806	0.9991	0.98167	0.963869	1.03873	0.995709	1.00552	1.00864	0.994714	1.0024	1.0004	0.980199	0.969185	1.02071	1.03479
900	chr3	43163350	43694244	1.01786	1.15223	1.03035	1.02963	1.01238	1.06759	1.00562	1.04791	1.02296	0.987479	0.992131	1.02409	0.991536	1.0024	1.003	1.02132	1.02439	1.06088	1.04477	0.9994	0.969476	0.969573	1.03087	1.03583	0.998301	1.02778	1.00541	1.01939	0.983439	0.995411	0.9992	1.01806	0.9991	0.98167	0.963869	1.03873	0.995709	1.00552	1.00864	0.994714	1.0024	1.0004	0.980199	0.969185	1.02071	1.03479
901	chr3	43694245	44214139	1.01786	1.15223	1.03035	1.02963	1.01238	1.06759	1.00562	1.04791	1.02296	0.987479	0.992131	1.02409	0.991536	1.0024	1.003	1.02132	1.02439	1.06088	1.04477	0.9994	0.969476	0.969573	1.03087	1.03583	0.998301	1.02778	1.00541	1.01939	0.983439	0.995411	0.9992	1.01806	0.9991	0.98167	0.963869	1.03873	0.995709	1.00552	1.00864	0.994714	1.0024	1.0004	0.980199	0.969185	1.02071	1.03479
902	chr3	44214140	44782404	1.01786	1.15223	1.03035	1.02963	1.01238	1.06759	1.00562	1.04791	1.02296	0.987479	0.992131	1.02409	0.991536	1.0024	1.003	1.02132	1.02439	1.06088	1.04477	0.9994	0.969476	0.969573	1.03087	1.03583	0.998301	1.02778	1.00541	1.01939	0.983439	0.995411	0.9992	1.01806	0.9991	0.98167	0.963869	1.03873	0.995709	1.00552	1.00864	0.994714	1.0024	1.0004	0.980199	0.969185	1.02071	1.03479
903	chr3	44782405	45298111	1.01786	1.15223	1.03035	1.02963	1.01238	1.06759	1.00562	1.04791	1.02296	0.987479	0.992131	1.02409	0.991536	1.0024	1.003	1.02132	1.02439	1.06088	1.04477	0.9994	0.969476	0.969573	1.03087	1.03583	0.998301	1.02778	1.00541	1.01939	0.983439	0.995411	0.9992	1.01806	0.9991	0.98167	0.963869	1.03873	0.995709	1.00552	1.00864	0.994714	1.0024	1.0004	0.980199	0.969185	1.02071	1.03479
904	chr3	45298112	45822942	1.01786	1.15223	1.03035	1.02963	1.01238	1.06759	1.00562	1.04791	1.02296	0.987479	0.992131	1.02409	0.991536	1.0024	1.003	1.02132	1.02439	1.06088	1.04477	0.9994	0.969476	0.969573	1.03087	1.03583	0.998301	1.02778	1.00541	1.01939	0.983439	0.995411	0.9992	1.01806	0.9991	0.98167	0.963869	1.03873	0.995709	1.00552	1.00864	0.994714	1.0024	1.0004	0.980199	0.969185	1.02071	1.03479
905	chr3	45822943	46339854	1.01786	1.15223	1.03035	1.02963	1.01238	1.06759	1.00562	1.04791	1.02296	0.987479	0.992131	1.02409	0.991536	1.0024	1.003	1.02132	1.02439	1.06088	1.04477	0.9994	0.969476	0.969573	1.03087	1.03583	0.998301	1.02778	1.00541	1.01939	0.983439	0.995411	0.9992	1.01806	0.9991	0.98167	0.963869	1.03873	0.995709	1.00552	1.00864	0.994714	1.0024	1.0004	0.980199	0.969185	1.02071	1.03479
906	chr3	46339855	46889781	1.01786	1.15223	1.03035	1.02963	1.01238	1.06759	1.00562	1.04791	1.02296	0.987479	0.992131	1.02409	0.991536	1.0024	1.003	1.02132	1.02439	1.06088	1.04477	0.9994	0.969476	0.969573	1.03087	1.03583	0.998301	1.02778	1.00541	1.01939	0.983439	0.995411	0.9992	1.01806	0.9991	0.98167	0.963869	1.03873	0.995709	1.00552	1.00864	0.994714	1.0024	1.0004	0.980199	0.969185	1.02071	1.03479
907	chr3	46889782	47446010	1.01786	1.15223	1.03035	1.02963	1.01238	1.06759	1.00562	1.04791	1.02296	0.987479	0.992131	1.02409	0.991536	1.0024	1.003	1.02132	1.02439	1.06088	1.04477	0.9994	0.969476	0.969573	1.03087	1.03583	0.998301	1.02778	1.00541	1.01939	0.983439	0.995411	0.9992	1.01806	0.9991	0.98167	0.963869	1.03873	0.995709	1.00552	1.00864	0.994714	1.0024	1.0004	0.980199	0.969185	1.02071	1.03479
908	chr3	47446011	48027036	1.01786	1.15223	1.03035	1.02963	1.01238	1.06759	1.00562	1.04791	1.02296	0.987479	0.992131	1.02409	0.991536	1.0024	1.003	1.02132	1.02439	1.06088	1.04477	0.9994	0.969476	0.969573	1.03087	1.03583	0.998301	0.824152	1.00541	1.01939	0.983439	0.995411	0.9992	1.01806	0.9991	0.98167	0.963869	1.03873	0.995709	1.00552	1.00864	0.994714	1.0024	1.0004	0.980199	0.969185	1.02071	1.03479
909	chr3	48027037	48600397	1.01786	1.15223	1.03035	1.02963	1.01238	1.06759	1.00562	1.04791	1.02296	0.987479	0.992131	1.02409	0.991536	1.0024	1.003	1.02132	1.02439	1.06088	1.04477	0.9994	0.969476	0.969573	1.03087	1.03583	0.998301	0.824152	1.00541	1.01939	0.983439	0.995411	0.9992	1.01806	0.9991	0.98167	0.963869	1.03873	0.995709	1.00552	1.00864	0.994714	1.0024	1.0004	0.980199	0.969185	1.02071	1.03479
910	chr3	48600398	49149706	1.01786	1.15223	1.03035	1.02963	1.01238	1.06759	1.00562	1.04791	1.02296	0.987479	0.992131	1.02409	0.991536	1.0024	1.003	1.02132	1.02439	1.06088	1.04477	0.9994	0.969476	0.969573	1.03087	1.03583	0.998301	0.824152	1.00541	1.01939	0.983439	0.995411	0.9992	1.01806	0.9991	0.98167	0.963869	1.03873	0.995709	1.00552	1.00864	0.994714	1.0024	1.0004	0.980199	0.969185	1.02071	1.03479
911	chr3	49149707	49700510	1.01786	1.15223	1.03035	1.02963	1.01238	1.06759	1.00562	1.04791	1.02296	0.987479	0.992131	1.02409	0.991536	1.0024	1.003	1.02132	1.02439	1.06088	1.04477	0.9994	0.969476	0.969573	1.03087	1.03583	0.998301	0.824152	1.00541	1.01939	0.983439	0.995411	0.9992	1.01806	0.9991	0.98167	0.963869	1.03873	0.995709	1.00552	1.00864	0.994714	1.0024	1.0004	0.980199	0.969185	1.02071	1.03479
912	chr3	49700511	50233179	1.01786	1.15223	1.03035	1.02963	1.01238	1.06759	1.00562	1.04791	1.02296	0.987479	0.992131	1.02409	0.991536	1.0024	1.003	1.02132	1.02439	1.06088	1.04477	0.9994	0.969476	0.969573	1.03087	1.03583	0.998301	0.824152	1.00541	1.01939	0.983439	0.995411	0.9992	1.01806	0.9991	0.98167	0.963869	1.03873	0.995709	1.00552	1.00864	0.994714	1.0024	1.0004	0.980199	0.969185	1.02071	1.03479
913	chr3	50233180	50727889	1.01786	1.15223	1.03035	1.02963	1.01238	1.06759	1.00562	1.04791	1.02296	0.987479	0.992131	1.02409	0.991536	1.0024	1.003	1.02132	1.02439	1.06088	1.04477	0.9994	0.969476	0.969573	1.03087	1.03583	0.998301	0.996506	1.00541	1.01939	0.983439	0.995411	0.9992	1.01806	0.9991	0.98167	0.963869	1.03873	0.995709	1.00552	1.00864	0.994714	1.0024	1.0004	0.980199	0.969185	1.02071	1.03479
914	chr3	50727890	51379533	1.01786	1.15223	1.03035	1.02963	1.01238	1.06759	1.00562	1.04791	1.02296	0.987479	0.992131	1.02409	0.991536	1.0024	1.003	1.02132	1.02439	1.06088	1.04477	0.9994	0.969476	0.969573	1.03087	1.03583	0.998301	0.996506	1.00541	1.01939	0.983439	0.995411	0.9992	1.01806	0.9991	0.98167	0.963869	1.03873	0.995709	1.00552	1.00864	0.994714	1.0024	1.0004	0.980199	0.969185	1.02071	1.03479
915	chr3	51379534	51962425	1.01786	1.15223	1.03035	1.02963	1.01238	1.06759	1.00562	1.04791	1.02296	0.987479	0.992131	1.02409	0.991536	1.0024	1.003	1.02132	1.02439	1.06088	1.04477	0.9994	0.969476	0.969573	1.03087	1.03583	0.998301	0.996506	1.00541	1.01939	0.983439	0.995411	0.9992	1.01806	0.9991	0.98167	0.963869	1.03873	0.995709	1.00552	1.00864	0.994714	1.0024	1.0004	0.980199	0.969185	1.02071	1.03479
916	chr3	51962426	52462523	1.01786	1.15223	1.03035	1.02963	1.01238	1.06759	1.00562	1.04791	1.02296	0.987479	0.992131	1.02409	0.991536	1.0024	1.003	1.02132	1.02439	1.06088	1.04477	0.9994	0.969476	0.969573	1.03087	1.03583	0.998301	0.996506	1.00541	1.01939	0.983439	0.995411	0.9992	1.01806	0.9991	0.98167	0.963869	1.03873	0.995709	1.00552	1.00864	0.994714	1.0024	1.0004	0.980199	0.969185	1.02071	1.03479
917	chr3	52462524	52995515	1.01786	1.15223	1.03035	1.02963	1.01238	1.06759	1.00562	1.04791	1.02296	0.987479	0.992131	1.02409	0.991536	1.0024	1.003	1.02132	1.02439	1.06088	1.04477	0.9994	0.969476	0.969573	1.03087	1.03583	0.998301	0.996506	1.00541	1.01939	0.983439	0.995411	0.9992	1.01806	0.9991	0.98167	0.963869	1.03873	0.995709	1.00552	1.00864	0.994714	1.0024	1.0004	0.980199	0.969185	1.02071	1.03479
918	chr3	52995516	53575891	1.01786	1.15223	1.03035	1.02963	1.01238	1.06759	1.00562	1.04791	1.02296	0.987479	0.992131	1.02409	0.991536	1.0024	1.003	1.02132	1.02439	1.06088	1.04477	0.9994	0.969476	0.969573	1.03087	1.03583	0.998301	0.996506	1.00541	1.01939	0.983439	0.995411	0.9992	1.01806	0.9991	0.98167	0.963869	1.03873	0.995709	1.00552	1.00864	0.994714	1.0024	1.0004	0.980199	0.969185	1.02071	1.03479
919	chr3	53575892	54093014	1.01786	1.15223	1.03035	1.02963	1.01238	1.06759	1.00562	1.04791	1.02296	0.987479	0.992131	1.02409	0.991536	1.0024	1.003	1.02132	1.02439	1.06088	1.04477	0.9994	0.969476	0.969573	1.03087	1.03583	0.998301	0.996506	1.00541	1.01939	0.983439	0.995411	0.9992	1.01806	0.9991	0.98167	0.963869	1.03873	0.995709	1.00552	1.00864	0.994714	1.0024	1.0004	0.980199	0.969185	1.02071	1.03479
920	chr3	54093015	54649019	1.01786	1.15223	1.03035	1.02963	1.01238	1.06759	1.00562	1.04791	1.02296	0.987479	0.992131	1.02409	0.991536	1.0024	1.003	1.02132	1.02439	1.06088	1.04477	0.9994	0.969476	0.969573	1.03087	1.03583	0.998301	0.996506	1.00541	1.01939	0.983439	0.995411	0.9992	1.01806	0.9991	0.98167	0.963869	1.03873	0.995709	1.00552	1.00864	0.994714	1.0024	1.0004	0.980199	0.969185	1.02071	1.03479
921	chr3	54649020	55169569	1.01786	1.15223	1.03035	1.02963	1.01238	1.06759	1.00562	1.04791	1.02296	0.987479	0.992131	1.02409	0.991536	1.0024	1.003	1.02132	1.02439	1.06088	1.04477	0.9994	0.969476	0.969573	1.03087	1.03583	0.998301	0.996506	1.00541	1.01939	0.983439	0.995411	0.9992	1.01806	0.9991	0.98167	0.963869	1.03873	0.995709	1.00552	1.00864	0.994714	1.0024	1.0004	0.980199	0.969185	1.02071	1.03479
922	chr3	55169570	55699552	1.01786	1.15223	1.03035	1.02963	1.01238	1.06759	1.00562	1.04791	1.02296	0.987479	0.992131	1.02409	0.991536	1.0024	1.003	1.02132	1.02439	1.06088	1.04477	0.9994	0.969476	0.969573	1.03087	1.03583	0.998301	0.996506	1.00541	1.01939	0.983439	0.995411	0.9992	1.01806	0.9991	0.98167	0.963869	1.03873	0.995709	1.00552	1.00864	0.994714	1.0024	1.0004	0.980199	0.969185	1.02071	1.03479
923	chr3	55699553	56231169	1.01786	1.15223	1.03035	1.02963	1.01238	1.06759	1.00562	1.04791	1.02296	0.987479	0.992131	1.02409	0.991536	1.0024	1.003	1.02132	1.02439	1.06088	1.04477	0.9994	0.969476	0.969573	1.03087	1.03583	0.998301	0.996506	1.00541	1.01939	0.983439	0.995411	0.9992	1.01806	0.9991	0.98167	0.963869	1.03873	0.995709	1.00552	1.00864	0.994714	1.0024	1.0004	0.980199	0.969185	1.02071	1.03479
924	chr3	56231170	56819544	1.01786	1.15223	1.03035	1.02963	1.01238	1.06759	1.00562	1.04791	1.02296	0.987479	0.992131	1.02409	0.991536	1.0024	1.003	1.02132	1.02439	1.06088	1.04477	0.9994	0.969476	0.969573	1.03087	1.03583	0.998301	0.996506	1.00541	1.01939	0.983439	0.995411	0.9992	1.01806	0.9991	0.98167	0.963869	1.03873	0.995709	1.00552	1.00864	0.994714	1.0024	1.0004	0.980199	0.969185	1.02071	1.03479
925	chr3	56819545	57384562	1.01786	1.15223	1.03035	1.02963	1.01238	1.06759	1.00562	1.04791	1.02296	0.987479	0.992131	1.02409	0.991536	1.0024	1.003	1.02132	1.02439	1.06088	1.04477	0.9994	0.969476	0.969573	1.03087	1.03583	0.998301	0.996506	1.00541	1.01939	0.983439	0.995411	0.9992	1.01806	0.9991	0.98167	0.963869	1.03873	0.995709	1.00552	1.00864	0.994714	1.0024	1.0004	0.980199	0.969185	1.02071	1.03479
926	chr3	57384563	57983851	1.01786	1.15223	1.03035	1.02963	1.01238	1.06759	1.00562	1.04791	1.02296	0.987479	0.992131	1.02409	0.991536	1.0024	1.003	1.02132	1.02439	1.06088	1.04477	0.9994	0.969476	0.969573	1.03087	1.03583	0.998301	0.996506	1.00541	1.01939	0.983439	0.995411	0.9992	1.01806	0.9991	0.98167	0.963869	1.03873	0.995709	1.00552	1.00864	0.994714	1.0024	1.0004	0.980199	0.969185	1.02071	1.03479
927	chr3	57983852	58497711	1.01786	1.15223	1.03035	1.02963	1.01238	1.06759	1.00562	1.04791	1.02296	0.987479	0.992131	1.02409	0.991536	1.0024	1.003	1.02132	1.02439	1.06088	1.04477	0.9994	0.969476	0.969573	1.03087	1.03583	0.998301	0.996506	1.00541	1.01939	0.983439	0.995411	0.9992	1.01806	0.9991	0.98167	0.963869	1.03873	0.995709	1.00552	1.00864	0.994714	1.0024	1.0004	0.980199	0.969185	1.02071	1.03479
928	chr3	58497712	59041179	1.01786	1.15223	1.03035	1.02963	1.01238	1.06759	1.00562	1.04791	1.02296	0.987479	0.992131	1.02409	0.991536	1.0024	1.003	1.02132	1.02439	1.06088	1.04477	0.9994	0.969476	0.969573	1.03087	1.03583	0.998301	0.996506	1.00541	1.01939	0.983439	0.995411	0.9992	1.01806	0.9991	0.98167	0.963869	1.03873	0.995709	1.00552	1.00864	0.994714	1.0024	1.0004	0.980199	0.969185	1.02071	1.03479
929	chr3	59041180	59607994	1.01786	1.15223	1.03035	1.02963	1.01238	1.06759	1.00562	1.04791	1.02296	0.987479	0.992131	1.02409	0.991536	1.0024	1.003	1.02132	1.02439	1.06088	1.04477	0.9994	0.969476	0.969573	1.03087	1.03583	0.998301	0.996506	1.00541	1.01939	0.983439	0.995411	0.9992	1.01806	0.9991	0.98167	0.963869	1.03873	0.995709	1.00552	1.00864	0.994714	1.0024	1.0004	0.980199	0.969185	1.02071	1.03479
930	chr3	59607995	60132560	1.01786	1.15223	1.03035	1.02963	1.01238	1.06759	1.00562	1.04791	1.02296	0.987479	0.992131	1.02409	0.991536	1.0024	1.003	1.02132	1.02439	1.06088	1.04477	0.9994	0.969476	0.969573	1.03087	1.03583	0.998301	0.996506	1.00541	1.01939	0.983439	0.995411	0.9992	1.01806	0.9991	0.98167	0.963869	1.03873	0.995709	1.00552	1.00864	0.994714	1.0024	1.0004	0.980199	0.969185	1.02071	1.03479
931	chr3	60132561	60705843	1.01786	1.15223	1.03035	1.02963	1.01238	1.06759	1.00562	1.04791	1.02296	0.987479	0.992131	1.02409	0.991536	1.0024	1.003	1.02132	1.02439	1.06088	1.04477	0.9994	0.969476	0.969573	1.03087	1.03583	0.998301	0.996506	1.00541	1.01939	0.983439	0.995411	0.9992	1.01806	0.9991	0.98167	0.963869	1.03873	0.995709	1.00552	1.00864	0.994714	1.0024	1.0004	0.980199	0.969185	1.02071	1.03479
932	chr3	60705844	61292345	1.01786	1.15223	1.03035	1.02963	1.01238	1.06759	1.00562	1.04791	1.02296	0.987479	0.992131	1.02409	0.991536	1.0024	1.003	1.02132	1.02439	1.06088	1.04477	0.9994	0.969476	0.969573	1.03087	1.03583	0.998301	0.996506	1.00541	1.01939	0.983439	0.995411	0.9992	1.01806	0.9991	0.98167	0.963869	1.03873	0.995709	1.00552	1.00864	0.994714	1.0024	1.0004	0.980199	0.969185	1.02071	1.03479
933	chr3	61292346	61857481	1.01786	1.15223	1.03035	1.02963	1.01238	1.06759	1.00562	1.04791	1.02296	0.987479	0.992131	1.02409	0.991536	1.0024	1.003	1.02132	1.02439	1.06088	1.04477	0.9994	0.969476	0.969573	1.03087	1.03583	0.998301	0.996506	1.00541	1.01939	0.983439	0.995411	0.9992	1.01806	0.9991	0.98167	0.963869	1.03873	0.995709	1.00552	1.00864	0.994714	1.0024	1.0004	0.980199	0.969185	1.02071	1.03479
934	chr3	61857482	62411970	1.01786	1.15223	1.03035	1.02963	1.01238	1.06759	1.00562	1.04791	1.02296	0.987479	0.992131	1.02409	0.991536	1.0024	1.003	1.02132	1.02439	1.06088	1.04477	0.9994	0.969476	0.969573	1.03087	1.03583	0.998301	0.996506	1.00541	1.01939	0.983439	0.995411	0.9992	1.01806	0.9991	0.98167	0.963869	1.03873	0.995709	1.00552	1.00864	0.994714	1.0024	1.0004	0.980199	0.969185	1.02071	1.03479
935	chr3	62411971	62937024	1.01786	1.15223	1.03035	1.02963	1.01238	1.06759	1.00562	1.04791	1.02296	0.987479	0.992131	1.02409	0.991536	1.0024	1.003	1.02132	1.02439	1.06088	1.04477	0.9994	0.969476	0.969573	1.03087	1.03583	0.998301	0.996506	1.00541	1.01939	0.983439	0.995411	0.9992	1.01806	0.9991	0.98167	0.963869	1.03873	0.995709	1.00552	1.00864	0.994714	1.0024	1.0004	0.980199	0.969185	1.02071	1.03479
936	chr3	62937025	63524511	1.01786	0.878974	1.03035	1.02963	1.01238	1.06759	1.00562	1.04791	1.02296	0.987479	0.992131	1.02409	0.991536	1.0024	1.003	1.02132	1.02439	1.06088	1.04477	0.9994	0.969476	0.969573	1.03087	1.03583	0.998301	0.996506	1.00541	1.01939	0.983439	0.995411	0.9992	1.01806	0.9991	0.98167	0.963869	1.03873	0.995709	1.00552	1.00864	0.994714	1.0024	1.0004	0.980199	0.969185	1.02071	1.03479
937	chr3	63524512	64072054	1.01786	0.878974	1.03035	1.02963	1.01238	1.06759	1.00562	1.04791	1.02296	0.987479	0.992131	1.02409	0.991536	1.0024	1.003	1.02132	1.02439	1.06088	1.04477	0.9994	0.969476	0.969573	1.03087	1.03583	0.998301	0.996506	1.00541	1.01939	0.983439	0.995411	0.9992	1.01806	0.9991	0.98167	0.963869	1.03873	0.995709	1.00552	1.00864	0.994714	1.0024	1.0004	0.980199	0.969185	1.02071	1.03479
938	chr3	64072055	64571001	1.01786	0.878974	1.03035	1.02963	1.01238	1.06759	1.00562	1.04791	1.02296	0.987479	0.992131	1.02409	0.991536	1.0024	1.003	1.02132	1.02439	1.06088	1.04477	0.9994	0.969476	0.969573	1.03087	1.03583	0.998301	0.996506	1.00541	1.01939	0.983439	0.995411	0.9992	1.01806	0.9991	0.98167	0.963869	1.03873	0.995709	1.00552	1.00864	0.994714	1.0024	1.0004	0.980199	0.969185	1.02071	1.03479
939	chr3	64571002	65098863	1.01786	0.878974	1.03035	1.02963	1.01238	1.06759	1.00562	1.04791	1.02296	0.987479	0.992131	1.02409	0.991536	1.0024	1.003	1.02132	1.02439	1.06088	1.04477	0.9994	0.969476	0.969573	1.03087	1.03583	0.998301	0.996506	1.00541	1.01939	0.983439	0.995411	0.9992	1.01806	0.9991	0.98167	0.963869	1.03873	0.995709	1.00552	1.00864	0.994714	1.0024	1.0004	0.980199	0.969185	1.02071	1.03479
940	chr3	65098864	65654069	1.01786	0.878974	1.03035	1.02963	1.01238	1.06759	1.00562	1.04791	1.02296	0.987479	0.992131	1.02409	0.991536	1.0024	1.003	1.02132	1.02439	1.06088	1.04477	0.9994	0.969476	0.969573	1.03087	1.03583	0.998301	0.996506	1.00541	1.01939	0.983439	0.995411	0.9992	1.01806	0.9991	0.98167	0.963869	1.03873	0.995709	1.00552	1.00864	0.994714	1.0024	1.0004	0.980199	0.969185	1.02071	1.03479
941	chr3	65654070	66283623	1.01786	0.878974	1.03035	1.02963	1.01238	1.06759	1.00562	1.04791	1.02296	0.987479	0.992131	1.02409	0.991536	1.0024	1.003	1.02132	1.02439	1.06088	1.04477	0.9994	0.969476	0.969573	1.03087	1.03583	0.998301	0.996506	1.00541	1.01939	0.983439	0.995411	0.9992	1.01806	0.9991	0.98167	0.963869	1.03873	0.995709	1.00552	1.00864	0.994714	1.0024	1.0004	0.980199	0.969185	1.02071	1.03479
942	chr3	66283624	66822907	1.01786	0.878974	1.03035	1.02963	1.01238	1.06759	1.00562	1.04791	1.02296	0.987479	0.992131	1.02409	0.991536	1.0024	1.003	1.02132	1.02439	1.06088	1.04477	0.9994	0.969476	0.969573	1.03087	1.03583	0.998301	0.996506	1.00541	1.01939	0.983439	0.995411	0.9992	1.01806	0.9991	0.98167	0.963869	1.03873	0.995709	1.00552	1.00864	0.994714	1.0024	1.0004	0.980199	0.969185	1.02071	1.03479
943	chr3	66822908	67412137	1.01786	0.878974	1.03035	1.02963	1.01238	1.06759	1.00562	1.04791	1.02296	0.987479	0.992131	1.02409	0.991536	1.0024	1.003	1.02132	1.02439	1.06088	1.04477	0.9994	0.969476	0.969573	1.03087	1.03583	0.998301	0.996506	1.00541	1.01939	0.983439	0.995411	0.9992	1.01806	0.9991	0.98167	0.963869	1.03873	0.995709	1.00552	1.00864	0.994714	1.0024	1.0004	0.980199	0.969185	1.02071	1.03479
944	chr3	67412138	68009767	1.01786	0.878974	1.03035	1.02963	1.01238	1.06759	1.00562	1.04791	1.02296	0.987479	0.992131	1.02409	0.991536	1.0024	1.003	1.02132	1.02439	1.06088	1.04477	0.9994	0.969476	0.969573	1.03087	1.03583	0.998301	0.996506	1.00541	1.01939	0.983439	0.995411	0.9992	1.01806	0.9991	0.98167	0.963869	1.03873	0.995709	1.00552	1.00864	0.994714	1.0024	1.0004	0.980199	0.969185	1.02071	1.03479
945	chr3	68009768	68606505	1.01786	0.878974	1.03035	1.02963	1.01238	1.06759	1.00562	1.04791	1.02296	0.987479	0.992131	1.02409	0.991536	1.0024	1.003	1.02132	1.02439	1.06088	1.04477	0.9994	0.969476	0.969573	1.03087	1.03583	0.998301	0.996506	1.00541	1.01939	0.983439	0.995411	0.9992	1.01806	0.9991	0.98167	0.963869	1.03873	0.995709	1.00552	1.00864	0.994714	1.0024	1.0004	0.980199	0.969185	1.02071	1.03479
946	chr3	68606506	69201479	1.01786	0.878974	1.03035	1.02963	1.01238	1.06759	1.00562	1.04791	1.02296	0.987479	0.992131	1.02409	0.991536	1.0024	1.003	1.02132	1.02439	1.06088	1.04477	0.9994	0.969476	0.969573	1.03087	1.03583	0.998301	0.996506	1.00541	1.01939	0.983439	0.995411	0.9992	1.01806	0.9991	0.98167	0.963869	1.03873	0.995709	1.00552	1.00864	0.994714	1.0024	1.0004	0.980199	0.969185	1.02071	1.03479
947	chr3	69201480	69772206	1.01786	0.878974	1.03035	1.02963	1.01238	1.06759	1.00562	1.04791	1.02296	0.987479	0.992131	1.02409	0.991536	1.0024	1.003	1.02132	1.02439	1.06088	1.04477	0.9994	0.969476	0.969573	1.03087	1.03583	0.998301	0.996506	1.00541	1.01939	0.983439	0.995411	0.9992	1.01806	0.9991	0.98167	0.963869	1.03873	0.995709	1.00552	1.00864	0.994714	1.0024	1.0004	0.980199	0.969185	1.02071	1.03479
948	chr3	69772207	70329331	1.01786	0.878974	1.03035	1.02963	1.01238	1.06759	1.00562	1.04791	1.02296	0.987479	0.992131	1.02409	0.991536	1.0024	1.003	1.02132	1.02439	1.06088	1.04477	0.9994	0.969476	0.969573	1.03087	1.03583	0.998301	0.996506	1.00541	1.01939	0.983439	0.995411	0.9992	1.01806	0.9991	0.98167	0.963869	1.03873	0.995709	1.00552	1.00864	0.994714	1.0024	1.0004	0.980199	0.969185	1.02071	1.03479
949	chr3	70329332	70939063	1.01786	0.878974	1.03035	1.02963	1.01238	1.06759	1.00562	1.04791	1.02296	0.987479	0.992131	1.02409	0.991536	1.0024	1.003	1.02132	1.02439	1.06088	1.04477	0.9994	0.969476	0.969573	1.03087	1.03583	0.998301	0.996506	1.00541	1.01939	0.983439	0.995411	0.9992	1.01806	0.9991	0.98167	0.963869	1.03873	0.995709	1.00552	1.00864	0.994714	1.0024	1.0004	0.980199	0.969185	1.02071	1.03479
950	chr3	70939064	71470803	1.01786	0.878974	1.03035	1.02963	1.01238	1.06759	1.00562	1.04791	1.02296	0.987479	0.992131	1.02409	0.991536	1.0024	1.003	1.02132	1.02439	1.06088	1.04477	0.9994	0.969476	0.969573	1.03087	1.03583	0.998301	0.996506	1.00541	1.01939	0.983439	0.995411	0.9992	1.01806	0.9991	0.98167	0.963869	1.03873	0.995709	1.00552	1.00864	0.994714	1.0024	1.0004	0.980199	0.969185	1.02071	1.03479
951	chr3	71470804	71999770	1.01786	0.878974	1.03035	1.02963	1.01238	1.06759	1.00562	1.04791	1.02296	0.987479	0.992131	1.02409	0.991536	1.0024	1.003	1.02132	1.02439	1.06088	1.04477	0.9994	0.969476	0.969573	1.03087	1.03583	0.998301	0.996506	1.00541	1.01939	0.983439	0.995411	0.9992	1.01806	0.9991	0.98167	0.963869	1.03873	0.995709	1.00552	1.00864	0.994714	1.0024	1.0004	0.980199	0.969185	1.02071	1.03479
952	chr3	71999771	72492845	1.01786	0.878974	1.03035	1.02963	1.01238	1.06759	1.00562	1.04791	1.02296	0.987479	0.992131	1.02409	0.991536	1.0024	1.003	1.02132	1.02439	1.06088	1.04477	0.9994	0.969476	0.969573	1.03087	1.03583	0.998301	0.996506	1.00541	1.01939	0.983439	0.995411	0.9992	1.01806	0.9991	0.98167	0.963869	1.03873	0.995709	1.00552	1.00864	0.994714	1.0024	1.0004	0.980199	0.969185	1.02071	1.03479
953	chr3	72492846	73062120	1.01786	0.878974	1.03035	1.02963	1.01238	1.06759	1.00562	1.04791	1.02296	0.987479	0.992131	1.02409	0.991536	1.0024	1.003	1.02132	1.02439	1.06088	1.04477	0.9994	0.969476	0.969573	1.03087	1.03583	0.998301	0.996506	1.00541	1.01939	0.983439	0.995411	0.9992	1.01806	0.9991	0.98167	0.963869	1.03873	0.995709	1.00552	1.00864	0.994714	1.0024	1.0004	0.980199	0.969185	1.02071	1.03479
954	chr3	73062121	73610569	1.01786	0.878974	1.03035	1.02963	1.01238	1.06759	1.00562	1.04791	1.02296	0.987479	0.992131	1.02409	0.991536	1.0024	1.003	1.02132	1.02439	1.06088	1.04477	0.9994	0.969476	0.969573	1.03087	1.03583	0.998301	0.996506	1.00541	1.01939	0.983439	0.995411	0.9992	1.01806	0.9991	0.98167	0.963869	1.03873	0.995709	1.00552	1.00864	0.994714	1.0024	1.0004	0.980199	0.969185	1.02071	1.03479
955	chr3	73610570	74161855	1.01786	0.878974	1.03035	1.02963	1.01238	1.06759	1.00562	1.04791	1.02296	0.987479	0.992131	1.02409	0.991536	1.0024	1.003	1.02132	1.02439	1.06088	1.04477	0.9994	0.969476	0.969573	1.03087	1.03583	0.998301	0.996506	1.00541	1.01939	0.983439	0.995411	0.9992	1.01806	0.9991	0.98167	0.963869	1.03873	0.995709	1.00552	1.00864	0.994714	1.0024	1.0004	0.980199	0.969185	1.02071	1.03479
956	chr3	74161856	74730480	1.01786	0.878974	1.03035	1.02963	1.01238	1.06759	1.00562	1.04791	1.02296	0.987479	0.992131	1.02409	0.991536	1.0024	1.003	1.02132	1.02439	1.06088	1.04477	0.9994	0.969476	0.969573	1.03087	1.03583	0.998301	0.996506	1.00541	1.01939	0.983439	0.995411	0.9992	1.01806	0.9991	0.98167	0.963869	1.03873	0.995709	1.00552	1.00864	0.994714	1.0024	1.0004	0.980199	0.969185	1.02071	1.03479
957	chr3	74730481	75336686	1.01786	0.878974	1.03035	1.02963	1.01238	1.06759	1.00562	1.04791	1.02296	0.987479	0.992131	1.02409	0.991536	1.0024	1.003	1.02132	1.02439	1.06088	1.04477	0.9994	0.969476	0.969573	1.03087	1.03583	0.998301	0.996506	1.00541	1.01939	0.983439	0.995411	0.9992	1.01806	0.9991	0.98167	0.963869	1.03873	0.995709	1.00552	1.00864	0.994714	1.0024	1.0004	0.980199	0.969185	1.02071	1.03479
958	chr3	75336687	75940031	1.01786	0.878974	1.03035	1.02963	1.01238	1.06759	1.00562	1.04791	1.02296	0.987479	0.992131	1.02409	0.991536	1.0024	1.003	1.02132	1.02439	1.06088	1.04477	0.9994	0.969476	0.969573	1.03087	1.03583	0.998301	0.996506	1.00541	1.01939	0.983439	0.995411	0.9992	1.01806	0.9991	0.98167	0.963869	1.03873	0.995709	1.00552	1.00864	0.994714	1.0024	1.0004	0.980199	0.969185	1.02071	1.03479
959	chr3	75940032	76555927	1.01786	0.878974	1.03035	1.02963	1.01238	1.06759	1.00562	1.04791	1.02296	0.987479	0.992131	1.02409	0.991536	1.0024	1.003	1.02132	1.02439	1.06088	1.04477	0.9994	0.969476	0.969573	1.03087	1.03583	0.998301	0.996506	1.00541	1.01939	0.983439	0.995411	0.9992	1.01806	0.9991	0.98167	0.963869	1.03873	0.995709	1.00552	1.00864	0.994714	1.0024	1.0004	0.980199	0.969185	1.02071	1.03479
960	chr3	76555928	77183143	1.01786	0.878974	1.03035	1.02963	1.01238	1.06759	1.00562	1.04791	1.02296	0.987479	0.992131	1.02409	0.991536	1.0024	1.003	1.02132	1.02439	1.06088	1.04477	0.9994	0.969476	0.969573	1.03087	1.03583	0.998301	0.996506	1.00541	1.01939	0.983439	0.995411	0.9992	1.01806	0.9991	0.98167	0.963869	1.03873	0.995709	1.00552	1.00864	0.994714	1.0024	1.0004	0.980199	0.969185	1.02071	1.03479
961	chr3	77183144	77810468	1.01786	0.878974	1.03035	1.02963	1.01238	1.06759	1.00562	1.04791	1.02296	0.987479	0.992131	1.02409	0.991536	1.0024	1.003	1.02132	1.02439	1.06088	1.04477	0.9994	0.969476	0.969573	1.03087	1.03583	0.998301	0.996506	1.00541	1.01939	0.983439	0.995411	0.9992	1.01806	0.9991	0.98167	0.963869	1.03873	0.995709	1.00552	1.00864	0.994714	1.0024	1.0004	0.980199	0.969185	1.02071	1.03479
962	chr3	77810469	78437169	1.01786	0.878974	1.03035	1.02963	1.01238	1.06759	1.00562	1.04791	1.02296	0.987479	0.992131	1.02409	0.991536	1.0024	1.003	1.02132	1.02439	1.06088	1.04477	0.9994	0.969476	0.969573	1.03087	1.03583	0.998301	0.996506	1.00541	1.01939	0.983439	0.995411	0.9992	1.01806	0.9991	0.98167	0.963869	1.03873	0.995709	1.00552	1.00864	0.994714	1.0024	1.0004	0.980199	0.969185	1.02071	1.03479
963	chr3	78437170	79070089	1.01786	0.878974	1.03035	1.02963	1.01238	1.06759	1.00562	1.04791	1.02296	0.987479	0.992131	1.02409	0.991536	1.0024	1.003	1.02132	1.02439	1.06088	1.04477	0.9994	0.969476	0.969573	1.03087	1.03583	0.998301	0.996506	1.00541	1.01939	0.983439	0.995411	0.9992	1.01806	0.9991	0.98167	0.963869	1.03873	0.995709	1.00552	1.00864	0.994714	1.0024	1.0004	0.980199	0.969185	1.02071	1.03479
964	chr3	79070090	79728056	1.01786	0.878974	1.03035	1.02963	1.01238	1.06759	1.00562	1.04791	1.02296	0.987479	0.992131	1.02409	0.991536	1.0024	1.003	1.02132	1.02439	1.06088	1.04477	0.9994	0.969476	0.969573	1.03087	1.03583	0.998301	0.996506	1.00541	1.01939	0.983439	0.995411	0.9992	1.01806	0.9991	0.98167	0.963869	1.03873	0.995709	1.00552	1.00864	0.994714	1.0024	1.0004	0.980199	0.969185	1.02071	1.03479
965	chr3	79728057	80392717	1.01786	0.878974	1.03035	1.02963	1.01238	1.06759	1.00562	1.04791	1.02296	0.987479	0.992131	1.02409	0.991536	1.0024	1.003	1.02132	1.02439	1.06088	1.04477	0.9994	0.969476	0.969573	1.03087	1.03583	0.998301	0.996506	1.00541	1.01939	0.983439	0.995411	0.9992	1.01806	0.9991	0.98167	0.963869	1.03873	0.995709	1.00552	1.00864	0.994714	1.0024	1.0004	0.980199	0.969185	1.02071	1.03479
966	chr3	80392718	81061276	1.01786	0.878974	1.03035	1.02963	1.01238	1.06759	1.00562	1.04791	1.02296	0.987479	0.992131	1.02409	0.991536	1.0024	1.003	1.02132	1.02439	1.06088	1.04477	0.9994	0.969476	0.969573	1.03087	1.03583	0.998301	0.996506	1.00541	1.01939	0.983439	0.995411	0.9992	1.01806	0.9991	0.98167	0.963869	1.03873	0.995709	1.00552	1.00864	0.994714	1.0024	1.0004	0.980199	0.969185	1.02071	1.03479
967	chr3	81061277	81675769	1.01786	0.878974	1.03035	1.02963	1.01238	1.06759	1.00562	1.04791	1.02296	0.987479	0.992131	1.02409	0.991536	1.0024	1.003	1.02132	1.02439	1.06088	1.04477	0.9994	0.969476	0.969573	1.03087	1.03583	0.998301	0.996506	1.00541	1.01939	0.983439	0.995411	0.9992	1.01806	0.9991	0.98167	0.963869	1.03873	0.995709	1.00552	1.00864	0.994714	1.0024	1.0004	0.980199	0.969185	1.02071	1.03479
968	chr3	81675770	82310601	1.01786	0.878974	1.03035	1.02963	1.01238	1.06759	1.00562	1.04791	1.02296	0.987479	0.992131	1.02409	0.991536	1.0024	1.003	1.02132	1.02439	1.06088	1.04477	0.9994	0.969476	0.969573	1.03087	1.03583	0.998301	0.996506	1.00541	1.01939	0.983439	0.995411	0.9992	1.01806	0.9991	0.98167	0.963869	1.03873	0.995709	1.00552	1.00864	0.994714	1.0024	1.0004	0.980199	0.969185	1.02071	1.03479
969	chr3	82310602	82992890	1.01786	0.878974	1.03035	1.02963	1.01238	1.06759	1.00562	1.04791	1.02296	0.987479	0.992131	1.02409	0.991536	1.0024	1.003	1.02132	1.02439	1.06088	1.04477	0.9994	0.969476	0.969573	1.03087	1.03583	0.998301	0.996506	1.00541	1.01939	0.983439	0.995411	0.9992	1.01806	0.9991	0.98167	0.963869	1.03873	0.995709	1.00552	1.00864	0.994714	1.0024	1.0004	0.980199	0.969185	1.02071	1.03479
970	chr3	82992891	83671502	1.01786	0.878974	1.03035	1.02963	1.01238	1.06759	1.00562	1.04791	1.02296	0.987479	0.992131	1.02409	0.991536	1.0024	1.003	1.02132	1.02439	1.06088	1.04477	0.9994	0.969476	0.969573	1.03087	1.03583	0.998301	0.996506	1.00541	1.01939	0.983439	0.995411	0.9992	1.01806	0.9991	0.98167	0.963869	1.03873	0.995709	1.00552	1.00864	0.994714	1.0024	1.0004	0.980199	0.969185	1.02071	1.03479
971	chr3	83671503	84363414	1.01786	0.878974	1.03035	1.02963	1.01238	1.06759	1.00562	1.04791	1.02296	0.987479	0.992131	1.02409	0.991536	1.0024	1.003	1.02132	1.02439	1.06088	1.04477	0.9994	0.969476	0.969573	1.03087	1.03583	0.998301	0.996506	1.00541	1.01939	0.983439	0.995411	0.9992	1.01806	0.9991	0.98167	0.963869	1.03873	0.995709	1.00552	1.00864	0.994714	1.0024	1.0004	0.980199	0.969185	1.02071	1.03479
972	chr3	84363415	85051872	1.01786	0.878974	1.03035	1.02963	1.01238	1.06759	1.00562	1.04791	1.02296	0.987479	0.992131	1.02409	0.991536	1.0024	1.003	1.02132	1.02439	1.06088	1.04477	0.9994	0.969476	0.969573	1.03087	1.03583	0.998301	0.996506	1.00541	1.01939	0.983439	0.995411	0.9992	1.01806	0.9991	0.98167	0.963869	1.03873	0.995709	1.00552	1.00864	0.994714	1.0024	1.0004	0.980199	0.969185	1.02071	1.03479
973	chr3	85051873	85747717	1.01786	0.878974	1.03035	1.02963	1.01238	1.06759	1.00562	1.04791	1.02296	0.987479	0.992131	1.02409	0.991536	1.0024	1.003	1.02132	1.02439	1.06088	1.04477	0.9994	0.969476	0.969573	1.03087	1.03583	0.998301	0.996506	1.00541	1.01939	0.983439	0.995411	0.9992	1.01806	0.9991	0.98167	0.963869	1.03873	0.995709	1.00552	1.00864	0.994714	1.0024	1.0004	0.980199	0.969185	1.02071	1.03479
974	chr3	85747718	86417976	1.01786	0.878974	1.03035	1.02963	1.01238	1.06759	1.00562	1.04791	1.02296	0.987479	0.992131	1.02409	0.991536	1.0024	1.003	1.02132	1.02439	1.06088	1.04477	0.9994	0.969476	0.969573	1.03087	1.03583	0.998301	0.996506	1.00541	1.01939	0.983439	0.995411	0.9992	1.01806	0.9991	0.98167	0.963869	1.03873	0.995709	1.00552	1.00864	0.994714	1.0024	1.0004	0.980199	0.969185	1.02071	1.03479
975	chr3	86417977	87051084	1.01786	0.878974	1.03035	1.02963	1.01238	1.06759	1.00562	1.04791	1.02296	0.987479	0.992131	1.02409	0.991536	1.0024	1.003	1.02132	1.02439	1.06088	1.04477	0.9994	0.837612	0.969573	1.03087	1.03583	0.998301	0.996506	1.00541	1.01939	0.983439	0.995411	0.9992	1.01806	0.9991	0.98167	0.963869	1.03873	0.995709	1.00552	1.00864	0.994714	1.0024	1.0004	0.980199	0.969185	1.02071	1.03479
976	chr3	87051085	87680548	1.01786	0.878974	1.03035	1.02963	1.01238	1.06759	1.00562	1.04791	1.02296	0.987479	0.992131	1.02409	0.991536	1.0024	1.003	1.02132	1.02439	1.06088	1.04477	0.9994	0.837612	0.969573	1.03087	1.03583	0.998301	0.996506	1.00541	1.01939	0.983439	0.995411	0.9992	1.01806	0.9991	0.98167	0.963869	1.03873	0.995709	1.00552	1.00864	0.994714	1.0024	1.0004	0.980199	0.969185	1.02071	1.03479
977	chr3	87680549	88326270	1.01786	0.878974	1.03035	1.02963	1.01238	1.06759	1.00562	1.04791	1.02296	0.987479	0.992131	1.02409	0.991536	1.0024	1.003	1.02132	1.02439	1.06088	1.04477	0.9994	0.837612	0.969573	1.03087	1.03583	0.998301	0.996506	1.00541	1.01939	0.983439	0.995411	0.9992	1.01806	0.9991	0.98167	0.963869	1.03873	0.995709	1.00552	1.00864	0.994714	1.0024	1.0004	0.980199	0.969185	1.02071	1.03479
978	chr3	88326271	88988064	1.01786	0.878974	1.03035	1.02963	1.01238	1.06759	1.00562	1.04791	1.02296	0.987479	0.992131	1.02409	0.991536	1.0024	1.003	1.02132	1.02439	1.06088	1.04477	0.9994	0.837612	0.969573	1.03087	1.03583	0.998301	0.996506	1.00541	1.01939	0.983439	0.995411	0.9992	1.01806	0.9991	0.98167	0.963869	1.03873	0.995709	1.00552	1.00864	0.994714	1.0024	1.0004	0.980199	0.969185	1.02071	1.03479
979	chr3	88988065	89620945	1.01786	0.878974	1.03035	1.02963	1.01238	1.06759	1.00562	1.04791	1.02296	0.987479	0.992131	1.02409	0.991536	1.0024	1.003	1.02132	1.02439	1.06088	1.04477	0.9994	0.837612	0.969573	1.03087	1.03583	0.998301	0.996506	1.00541	1.01939	0.983439	0.995411	0.9992	1.01806	0.9991	0.98167	0.963869	1.03873	0.995709	1.00552	1.00864	0.994714	1.0024	1.0004	0.980199	0.969185	1.02071	1.03479
980	chr3	89620946	90305091	1.01786	0.878974	1.03035	1.02963	1.01238	1.06759	1.00562	1.04791	1.02296	0.987479	0.992131	1.02409	0.991536	1.0024	1.003	1.02132	1.02439	1.06088	1.04477	0.9994	0.837612	0.969573	1.03087	1.03583	0.998301	0.996506	1.00541	1.01939	0.983439	0.995411	0.9992	1.01806	0.9991	0.98167	0.963869	1.03873	0.995709	1.00552	1.00864	0.994714	1.0024	1.0004	0.980199	0.969185	1.02071	1.03479
981	chr3	90305092	93996818	1.01786	0.878974	1.03035	0.505504	1.01238	1.06759	1.00562	1.04791	1.02296	0.987479	0.992131	1.02409	0.991536	1.0024	1.003	1.02132	1.02439	1.06088	1.04477	0.9994	0.837612	0.969573	0.534406	1.03583	0.540155	0.996506	1.00541	0.543134	0.983439	0.995411	0.9992	1.01806	0.9991	0.98167	0.963869	1.03873	0.995709	0.471328	1.00864	0.994714	1.0024	1.0004	0.980199	0.969185	1.02071	1.03479
982	chr3	93996819	94645036	1.01786	0.878974	1.03035	0.505504	1.01238	1.06759	0.514582	1.04791	0.535476	0.987479	0.992131	1.02409	0.991536	1.0024	1.003	1.02132	0.677734	1.06088	1.04477	0.9994	0.837612	0.969573	0.534406	1.03583	0.540155	0.670789	1.00541	0.543134	0.983439	0.995411	0.9992	1.01806	0.9991	0.98167	0.963869	1.03873	0.995709	0.471328	1.00864	0.994714	1.0024	1.0004	0.550075	0.812613	1.02071	0.887541
983	chr3	94645037	95344686	1.01786	0.878974	1.03035	0.505504	1.01238	1.06759	0.514582	1.04791	0.535476	0.987479	0.992131	1.02409	0.991536	1.0024	1.003	0.525503	0.677734	1.06088	1.04477	0.9994	0.837612	0.969573	0.534406	1.03583	0.540155	0.670789	1.00541	0.543134	0.983439	0.995411	0.9992	1.01806	0.9991	0.98167	0.963869	1.03873	0.995709	0.471328	1.00864	0.994714	1.0024	1.0004	0.550075	0.812613	1.02071	0.887541
984	chr3	95344687	96051870	1.01786	0.878974	1.03035	0.505504	1.01238	1.06759	0.514582	1.04791	0.535476	0.987479	0.992131	1.02409	0.991536	1.0024	1.003	0.525503	0.677734	1.06088	1.04477	0.9994	0.837612	0.969573	0.534406	1.03583	0.540155	0.670789	1.00541	0.543134	0.983439	0.995411	0.746619	1.01806	0.9991	0.98167	0.502078	1.03873	0.995709	0.471328	1.00864	0.994714	1.0024	1.0004	0.550075	0.812613	1.02071	0.887541
985	chr3	96051871	96745824	1.01786	0.878974	1.03035	0.505504	1.01238	0.721589	0.514582	1.04791	0.535476	0.987479	0.992131	1.02409	0.991536	1.0024	0.490319	0.525503	0.677734	1.06088	1.04477	0.9994	0.837612	0.969573	0.534406	1.03583	0.540155	0.670789	1.00541	0.543134	0.983439	0.995411	0.746619	1.01806	0.9991	0.98167	0.502078	1.03873	0.995709	0.471328	1.00864	0.994714	1.0024	1.0004	0.550075	0.812613	1.02071	0.887541
986	chr3	96745825	97409891	1.01786	0.878974	1.03035	0.505504	1.01238	0.721589	0.514582	1.04791	0.535476	0.987479	0.992131	1.02409	0.991536	1.0024	0.490319	0.525503	0.677734	1.06088	1.04477	0.9994	0.837612	0.969573	0.534406	1.03583	0.540155	0.670789	1.00541	0.543134	0.983439	0.995411	0.746619	1.01806	0.9991	0.98167	0.502078	1.03873	0.995709	0.471328	1.00864	0.994714	1.0024	1.0004	0.550075	0.812613	1.02071	0.887541
987	chr3	97409892	98017624	1.01786	0.878974	1.03035	0.505504	1.01238	0.721589	0.514582	1.04791	0.535476	0.987479	0.992131	1.02409	0.991536	1.0024	0.490319	0.525503	0.677734	1.06088	1.04477	0.9994	0.837612	0.969573	0.534406	1.03583	0.540155	0.670789	1.00541	0.543134	0.983439	0.995411	0.746619	1.01806	0.9991	0.98167	0.502078	1.03873	0.995709	0.471328	1.00864	0.994714	1.0024	1.0004	0.550075	0.812613	1.02071	0.887541
988	chr3	98017625	98623016	1.01786	0.878974	1.03035	0.505504	1.01238	0.721589	0.514582	1.04791	0.535476	0.987479	0.992131	1.02409	0.991536	1.0024	0.490319	0.525503	0.454844	1.06088	1.04477	0.9994	0.837612	0.969573	0.534406	1.03583	0.540155	0.670789	1.00541	0.543134	0.983439	0.995411	0.746619	1.01806	0.9991	0.98167	0.502078	1.03873	0.995709	0.471328	1.00864	0.994714	1.0024	1.0004	0.550075	0.812613	1.02071	0.887541
989	chr3	98623017	99220607	1.01786	0.878974	1.03035	0.505504	1.01238	0.721589	0.514582	1.04791	0.535476	0.987479	0.992131	1.02409	0.991536	1.0024	0.490319	0.525503	0.454844	1.06088	1.04477	0.9994	0.837612	0.969573	0.534406	1.03583	0.540155	0.670789	1.00541	0.543134	0.983439	0.995411	0.746619	1.01806	0.9991	0.98167	0.502078	1.03873	0.995709	0.471328	1.00864	0.994714	1.0024	1.0004	0.550075	0.812613	1.02071	0.887541
990	chr3	99220608	99779771	1.01786	0.878974	1.03035	0.505504	1.01238	0.721589	0.514582	1.04791	0.535476	0.987479	0.992131	1.02409	0.991536	1.0024	0.490319	0.525503	0.454844	1.06088	1.04477	0.9994	0.837612	0.969573	0.534406	1.03583	0.540155	0.670789	1.00541	0.543134	0.983439	0.995411	0.746619	1.01806	0.9991	0.98167	0.502078	1.03873	0.995709	0.471328	1.00864	0.994714	1.0024	1.0004	0.550075	0.812613	1.02071	0.887541
991	chr3	99779772	100333224	1.01786	0.878974	1.03035	0.505504	1.01238	0.721589	0.514582	1.04791	0.535476	0.987479	0.992131	1.02409	0.991536	1.0024	0.490319	0.525503	0.454844	1.06088	1.04477	0.9994	0.837612	0.969573	0.534406	1.03583	0.540155	0.670789	1.00541	0.543134	0.983439	0.995411	0.746619	1.01806	0.9991	0.98167	0.502078	1.03873	0.995709	0.471328	1.00864	0.994714	1.0024	1.0004	0.550075	0.812613	1.02071	0.887541
992	chr3	100333225	100871347	1.01786	0.878974	1.03035	0.505504	1.01238	0.721589	0.514582	1.04791	0.535476	0.987479	0.992131	1.02409	0.991536	1.0024	0.490319	0.525503	0.454844	1.06088	1.04477	0.9994	0.837612	0.969573	0.534406	1.03583	0.540155	0.670789	1.00541	0.543134	0.983439	0.995411	0.746619	1.01806	0.9991	0.98167	0.502078	1.03873	0.995709	0.471328	1.00864	0.994714	1.0024	1.0004	0.550075	0.812613	1.02071	0.887541
993	chr3	100871348	101463012	1.01786	0.878974	1.03035	0.505504	1.01238	0.721589	0.514582	1.04791	0.535476	0.987479	0.992131	1.02409	0.991536	1.0024	0.490319	0.525503	0.454844	1.06088	1.04477	0.9994	0.837612	0.969573	0.534406	1.03583	0.540155	0.670789	1.00541	0.543134	0.983439	0.995411	0.746619	1.01806	0.9991	0.98167	0.502078	1.03873	0.995709	0.471328	1.00864	0.994714	1.0024	1.0004	0.550075	0.812613	1.02071	0.887541
[truncated: 4,007 more rows]
[truncated: 230 more columns]
