# Supplementary material for: Copolymerization of single-cell nucleic acids into balls of acrylamide gel
Source: Genome Res. 2020 Jan;30(1):49–61. doi: 10.1101/gr.253047.119 (PMC6961581; doi:10.1101/gr.253047.119)
Supplement: Supplemental Material [file supp_gr.253047.119_Supplemental_Data_S6.xlsx]

## Sheet: README
Supplemental Data S6 - Segmented normalized bin count data for DNA BAGs from sample nyu005_14
Column name	Description
bin.number	sequence number of bin in genome order
chrom	chromosome location of the bin
bin.start	chromosome position bin start coordinate in hg19
bin.end	chromosome position bin end coordinate in hg19
11-character string consisting of ACGT indicating the BAG barcode	the segmented normalized bin count value

## Sheet: nyu005_14.5k.bins.norm
bin.number	chrom	bin.start	bin.end	AAACTGAATAT	AAACTGAGATC	AAACTGCATCC	AAACTGGTTCT	AAAGGGAGAGA	AACCTCGCAGT	AACGTAAGTAC	AACGTAATAGT	AACTTGTGAAC	AACTTGTTACC	AAGGTTCTACT	AAGTCAAGTAC	AAGTCAGAATC	AAGTCAGGTCA	AATCGAAATTG	AGAAGGACTGA	AGAAGGCATAA	AGAAGGCGTAG	AGAGCAGGTTG	AGAGTCTTATT	AGCAACACTCT	AGCAACCGACA	AGCAACCTAGA	AGCAACGAATC	AGCAACTGTCC	AGCAGTCGTTC	AGCAGTCTTGT	AGCTAGCAAGT	AGCTAGTGTCC	AGGTACATATA	AGGTTTAGAGA	AGGTTTGAAGA	AGTACACTTAC	AGTACATATTC	AGTACATGTAA	AGTATTGATAC	AGTGTGCTTAC	AGTGTGTCAGA	AGTTCGCTACT	AGTTCGGTTCT	AGTTCGTGTGG	ATAACGCAAGT	ATAACGTATTC	ATAGTTATTCC	ATAGTTCTACT	ATATAGGAACT
1	chr1	1	428275	1.18041	1.49728	0.818027	0.917857	0.91193	1.0713	1.24881	1.22227	0.589948	1.04652	0.825871	1.08491	1.38566	0.820411	1.38505	1.55519	1.05836	1.01867	1.10015	1.2079	1.38113	0.825347	1.23788	0.764645	1.72572	0.958689	1.17668	1.13386	1.1855	1.34896	1.18454	1.31208	1.14752	0.923927	1.65214	1.18778	1.07234	1.26164	1.18323	1.29572	0.996928	0.948662	0.904269	0.967889	1.27428	1.1394
2	chr1	428276	620697	0.670521	1.37111	0.545045	0.972818	0.936777	1.05599	1.03137	0.658694	0.416366	0.413064	0.553176	0.693382	0.885181	0.477958	0.52766	1.4291	0.26785	0.660927	0.539777	1.10238	0.836557	0.61064	0.721913	0.315908	1.40012	0.657428	0.600541	1.00117	0.870456	0.72786	0.987264	0.760191	0.624611	0.715898	0.977597	0.785638	0.545768	1.25299	0.339345	0.406805	0.460696	0.418849	0.425591	0.535023	0.858722	0.692094
3	chr1	620698	1122128	0.965376	1.41057	0.944135	1.16432	1.46473	1.52874	1.1052	1.18834	1.04375	0.760831	1.03625	1.38321	1.0624	1.00443	1.49182	1.129	1.14115	0.965297	0.979875	1.06888	1.03176	0.805291	1.60017	0.938155	0.768108	1.05598	1.13965	1.75503	0.897312	1.87821	1.04921	0.262913	0.896418	0.837177	1.18279	1.06125	1.09366	1.53701	1.10896	1.11475	0.902043	0.65448	1.39941	0.92798	1.2651	1.01654
4	chr1	1122129	1779256	1.06253	1.43346	1.23674	0.891031	1.17086	1.5505	1.01411	0.905706	1.93452	1.0414	0.626558	1.35814	0.834522	0.940708	0.99645	0.69582	1.71061	1.20132	0.9841	2.15599	1.13054	1.00378	0.854503	1.1721	1.23446	0.800477	1.01458	0.91057	0.772758	0.854048	1.00304	0.526318	0.840287	0.799559	0.825546	1.08624	0.482703	1.58446	1.29665	0.527512	0.983255	0.945244	0.787947	0.546009	1.23437	1.24466
5	chr1	1779257	2357606	1.2561	1.34107	1.07812	0.626504	0.833348	0.869449	1.09195	0.838084	0.960123	0.986525	1.07416	0.860445	0.764185	1.06205	0.68822	1.07512	1.15873	0.917333	0.944538	0.855451	0.95945	0.615565	1.24543	1.16727	0.743138	0.875958	1.13386	0.736815	1.31877	1.26911	0.89271	0.973707	0.862513	0.789193	0.885345	1.46037	0.637205	0.775951	1.04844	1.16322	1.44761	0.826988	0.914858	1.1169	1.07793	0.818877
6	chr1	2357607	2964887	1.19536	1.70413	1.00225	1.7013	1.22937	1.4989	1.40671	1.06617	1.4832	1.58056	1.30154	1.64558	1.26863	1.62385	1.04553	1.23446	1.75871	1.19257	1.40238	1.75977	1.86801	2.55598	1.10247	1.59591	1.12848	1.77289	2.23518	1.41176	1.49191	2.00379	1.78589	1.23115	1.48936	1.85669	1.9329	1.73152	0.901147	1.00446	1.5079	1.18386	1.11908	1.29267	1.20103	1.47539	1.3788	1.52102
7	chr1	2964888	3470030	1.47664	1.3298	0.900031	0.932548	1.15302	0.946378	1.32812	1.11618	0.776315	0.992023	1.28588	0.838973	1.39058	0.935533	0.794969	0.949437	0.579831	1.28821	1.39431	1.40185	1.17905	0.942986	1.21176	0.650105	1.19587	0.915866	1.12796	1.47762	0.987732	1.22027	1.11406	0.751702	1.00413	1.00905	0.83571	0.851797	1.35906	0.605909	1.00279	1.13678	1.11135	1.12016	1.19158	1.12755	1.06907	0.991522
8	chr1	3470031	4193611	0.962207	1.51282	0.971537	1.18763	1.04531	1.18825	1.3216	1.11015	1.14627	0.968212	1.09019	0.896478	0.487019	0.783404	0.753344	1.37869	1.49607	1.03257	1.25427	1.24059	0.98543	1.10386	1.31199	1.25513	0.756383	1.12215	0.962478	0.838778	1.09539	1.1886	0.848231	1.52572	0.818655	0.664539	1.24942	1.16414	1.19294	0.876919	0.876547	0.990753	0.888245	1.08438	0.667218	0.993605	1.08292	0.771819
9	chr1	4193612	4734431	1.08209	1.00495	0.631673	1.11866	1.0119	1.44112	1.08134	0.803939	1.10635	0.935175	0.912512	1.10897	0.619856	1.2682	1.46472	0.880803	1.20659	1.06685	0.8718	1.25597	1.168	0.726038	1.54982	1.21109	0.915292	0.944412	1.10106	1.28277	1.21155	1.36311	0.928681	1.02075	0.99298	0.941565	0.641926	0.878385	1.49872	1.54135	0.908602	1.08716	1.5434	0.935796	1.04866	1.24465	0.824165	1.05883
10	chr1	4734432	5296313	0.898349	0.85199	0.71592	1.19284	1.30432	1.1086	0.866333	1.39978	1.48283	0.693355	0.828366	1.454	1.63227	1.38471	1.3368	1.40276	1.42951	1.09404	1.42695	0.91506	1.01394	0.903181	1.15335	1.14524	0.940215	0.829422	1.00803	1.15086	1.26693	1.50428	1.04814	1.30922	1.26883	0.850485	0.875825	0.65334	1.3126	1.62039	1.07266	1.10803	0.973435	1.08448	0.708304	1.38367	1.04525	1.07919
11	chr1	5296314	5845062	1.08718	1.45477	0.857786	1.36352	1.12093	1.36751	1.00936	1.1472	1.34332	1.19845	1.45701	1.14061	1.42139	1.01047	1.3597	1.33593	0.508978	1.07138	0.911261	1.15798	1.34743	1.02295	0.936148	1.08171	1.41722	1.04671	0.907011	1.09102	0.945965	0.91128	0.943868	1.00111	0.618472	0.887387	1.27323	0.830671	1.40383	1.2539	1.28633	1.06941	1.16582	1.59727	0.833264	1.05256	0.921017	1.12435
12	chr1	5845063	6382868	0.963837	1.28316	1.04573	1.15974	1.47224	0.903678	0.910481	0.817051	1.23411	0.887558	1.11318	0.818555	1.15505	0.977335	1.7688	0.814954	1.12423	1.28916	1.11742	1.05182	1.12572	0.956232	1.13423	1.00714	0.662941	1.17211	1.01294	0.989972	1.08352	1.49127	1.03814	0.827337	1.15927	0.817428	0.608426	1.0481	1.07719	0.841248	1.06052	1.03514	1.09011	1.05932	1.26797	0.885196	1.1742	0.57314
13	chr1	6382869	6962366	0.960946	1.1782	1.00631	1.20315	0.970895	1.05332	1.13679	0.891924	1.1388	1.04565	0.772716	1.04369	1.88178	1.11295	1.0658	1.08841	0.812163	0.8563	1.05078	1.47341	1.15786	0.904834	1.48766	1.12774	0.979382	1.18474	1.19332	1.40132	1.24429	0.828705	1.12145	0.841045	0.990946	0.753329	1.33387	0.730034	1.51253	1.21587	1.17642	0.708862	1.01679	1.35297	1.24361	1.24367	0.837216	1.3387
14	chr1	6962367	7468721	0.769984	1.22929	1.22667	1.16274	1.02644	0.960302	1.15162	1.03313	1.04795	0.957699	0.860902	1.24161	1.22433	0.922068	0.877235	0.915559	1.07743	0.820789	1.27104	0.878605	0.946938	0.892541	0.91254	0.885021	0.944708	0.972944	0.541168	0.804986	0.797688	0.795665	1.09504	1.14243	0.919313	0.489764	0.981159	1.23758	1.18263	1.11581	0.997361	0.936348	0.731407	0.999106	0.791413	0.907056	0.985193	1.07593
15	chr1	7468722	7999687	0.906797	1.13418	0.76016	1.46034	1.12855	0.795432	1.07308	0.743074	1.12327	0.657387	0.999324	1.0372	0.90189	1.20403	0.875036	0.801951	1.38284	1.06319	1.07817	0.847114	1.10877	1.08133	0.88367	0.9975	1.18374	1.01614	0.924128	0.772906	0.771879	0.737964	1.37634	1.32697	1.11851	1.04684	0.960567	0.828557	1.05662	0.670479	0.78593	1.14936	1.0725	0.933116	0.807242	1.38829	1.06302	1.06806
16	chr1	7999688	8554982	1.42072	1.21502	0.896403	1.00384	1.16192	0.707071	1.16732	0.689652	1.21794	1.08819	1.28275	0.837587	1.31436	0.974022	0.924278	1.08193	1.29009	0.998204	0.823253	0.697832	1.11669	0.924896	1.0277	0.952787	1.36673	1.05029	1.13297	1.28354	0.919855	1.54004	0.836874	0.683096	1.25648	1.08287	0.951143	1.22739	1.30539	0.716753	0.848798	0.697758	0.918371	0.719377	0.788869	1.22006	0.987113	1.29329
17	chr1	8554983	9133954	1.03245	1.20724	1.14582	0.842655	1.24783	1.11767	1.15269	0.966898	1.44385	1.55751	1.20003	1.02709	1.03977	1.16939	1.15476	1.17402	0.722227	1.02257	1.39536	1.14804	0.906606	0.81141	0.927124	1.03561	0.862913	0.90382	0.972787	0.624757	0.857871	1.55533	1.10269	1.17313	1.33882	1.12035	0.762293	1.07633	1.09916	1.30109	1.10105	1.2019	0.876569	1.27014	1.41283	1.00314	0.951946	1.24146
18	chr1	9133955	9673433	1.11868	0.947249	1.35906	1.252	1.00021	0.823893	0.863213	1.72951	0.705971	0.802682	1.29635	1.04999	0.904759	1.05222	0.746008	0.849616	0.985749	0.83737	0.692636	1.23955	1.09186	0.949157	1.2406	0.900517	1.10181	0.907045	0.601417	0.969306	1.04431	0.861169	0.862385	1.59617	0.867672	0.706254	0.673639	0.720724	0.788991	1.39935	1.30661	1.0753	0.932272	1.01659	0.853788	1.11847	1.38927	0.960599
19	chr1	9673434	10246190	1.20939	0.91015	2.07683	1.02972	1.17572	1.3921	1.04553	1.06114	1.49656	1.26826	0.995034	1.41827	0.917354	0.70213	1.24472	1.12337	1.57338	1.03689	1.07175	0.962051	1.11227	0.824968	0.934629	1.21233	0.945376	0.8637	0.939068	0.806648	0.922639	1.3156	0.979856	1.30366	0.993624	1.51475	0.68044	1.07481	1.71007	0.930953	1.01416	0.749658	1.23458	1.1263	0.869503	1.22318	0.918628	1.27161
20	chr1	10246191	10793949	0.98383	1.03158	0.92943	1.10952	1.25057	1.3573	0.776837	1.58796	1.30253	0.495566	0.709665	0.845852	1.03568	0.971228	0.836947	1.04283	0.739399	1.25093	0.940151	0.965293	1.14145	1.12277	0.973758	0.885475	1.02541	0.82936	1.20068	0.806482	0.799861	0.744458	0.867028	0.512302	1.22725	1.46195	0.813698	1.34493	1.06281	0.886936	1.0642	1.07578	0.940576	0.842661	0.830366	0.933659	0.853682	0.893908
21	chr1	10793950	11339541	1.02576	1.09473	0.808642	1.15911	1.13276	1.11495	1.67717	0.701269	1.18212	1.17078	0.924327	1.00753	1.12778	1.06945	0.700328	0.83365	1.33711	0.925634	1.0765	1.03888	1.10115	0.87779	1.16988	0.967405	0.994268	1.21582	1.12832	0.937063	0.911301	0.95535	1.05583	0.646392	1.16846	1.05444	1.13	1.1791	0.882861	0.635057	0.995776	1.05726	1.57375	0.997083	0.811612	1.1918	0.75822	1.08646
22	chr1	11339542	11889564	0.905421	1.53916	1.25107	1.39409	1.08312	0.65529	1.02672	0.976833	1.41743	1.23646	0.661457	1.10386	0.535113	1.15549	1.1039	0.728741	0.842252	1.16933	0.830821	1.29816	1	1.36437	0.934759	1.26063	0.368272	1.01936	1.36962	1.12204	0.953268	1.76615	1.10238	1.24065	0.92812	0.95773	0.899264	0.874362	0.979392	0.716415	1.17884	1.30244	1.1004	1.14954	0.826462	1.40877	0.856153	1.20288
23	chr1	11889565	12416188	0.948799	1.3252	1.0977	0.92005	1.00457	1.01086	1.06639	1.45257	1.30507	1.0668	1.29925	1.01801	0.708182	0.778597	0.936443	0.989652	0.971735	1.21359	0.839644	1.11561	0.936869	0.994589	1.46561	0.940846	0.642738	0.885731	1.0619	0.954235	1.10273	1.18525	0.92066	0.694583	0.772088	0.747679	0.716763	1.05111	0.887819	0.840463	0.94368	1.11166	0.768764	0.803504	0.786596	0.843468	0.993577	0.973047
24	chr1	12416189	12936486	1.29531	1.07707	1.29169	0.96104	0.855069	1.04229	0.870192	0.79729	1.35479	0.797842	1.03548	1.09463	0.578135	0.88912	1.85972	1.09349	1.25133	0.729688	0.780124	0.909031	1.19675	0.927051	0.87058	0.762822	0.906579	0.961707	1.17814	1.55183	0.964829	0.773469	0.8567	1.02642	1.22232	0.618568	1.22849	1.21965	0.896919	0.901322	0.846263	0.834129	0.842947	1.23303	0.882882	1.06202	0.979286	0.8098
25	chr1	12936487	13636282	1.31439	1.73285	0.674879	0.837557	1.19078	0.897646	0.880114	1.18949	0.596091	0.495618	1.12421	0.887579	0.947988	1.04616	0.612372	0.509323	0.99678	0.728826	0.600238	1.94695	1.30654	1.00862	0.91753	1.02702	1.15019	1.01095	1.07695	1.12786	1.36289	0.732526	1.47601	1.11577	0.836673	0.836656	1.13614	0.885637	0.92196	1.07826	1.00335	1.0672	0.855628	1.31232	0.989481	1.16602	0.71534	1.08724
26	chr1	13636283	14233689	0.898224	1.5695	1.11844	1.04741	1.27936	0.849274	1.14375	1.15968	1.0661	1.04006	1.54819	0.839979	1.39866	1.03862	0.962269	0.884219	1.02747	0.729374	0.908136	0.774093	1.38926	0.802524	1.11338	1.43151	1.60725	1.00226	1.41134	1.68213	1.3098	1.11592	1.048	0.69118	1.09068	1.03975	1.31352	0.93352	1.60077	1.13795	1.12147	1.219	0.713831	1.11453	1.48443	1.08392	1.30113	1.42332
27	chr1	14233690	14779206	0.851898	1.42151	1.37279	0.86826	1.03645	1.01184	0.978368	1.55377	1.35772	1.00652	1.09961	1.07862	0.665663	1.04618	0.854183	1.32652	0.897818	0.950781	1.15182	0.773247	1.24602	1.10473	0.879868	0.996393	1.01587	1.03835	0.913336	1.78363	1.13858	1.2906	1.06457	0.997077	0.835646	1.23474	1.4062	1.70129	1.0526	1.19394	1.16297	0.932972	1.14629	0.790637	0.975395	0.836227	0.872603	0.966842
28	chr1	14779207	15303889	0.921981	0.805214	1.70321	0.982038	1.40187	1.18902	1.11302	0.906208	1.84478	0.958714	1.53625	1.50756	0.591381	1.08601	0.871792	1.09631	1.46593	0.951736	0.881832	0.805505	1.26566	0.859854	1.35717	1.08155	0.969193	1.21305	1.01963	0.757657	0.996392	1.14533	1.05719	1.1462	0.875647	0.9717	1.36349	0.996705	0.949948	1.11169	1.36328	1.19287	1.12644	0.968175	1.34022	0.954584	0.965486	0.940846
29	chr1	15303890	15826550	1.04577	1.36482	1.0002	1.31647	1.16604	0.929891	1.13829	1.2308	1.39654	0.880368	1.61941	1.36389	1.40672	0.86793	1.05194	1.29845	0.646619	1.14976	1.00742	1.26896	1.35282	1.20243	1.17683	1.13912	0.868673	0.99812	0.853627	1.26531	0.961201	1.0715	1.06721	1.13889	1.06295	0.425669	1.55384	1.093	1.20493	0.878332	1.1003	1.05282	1.30414	0.931978	1.315	1.12218	1.18966	1.1711
30	chr1	15826551	16392039	1.11164	1.04386	1.23039	1.03228	0.574557	0.657994	0.89715	1.0397	1.07107	0.693271	1.07287	1.06509	0.975131	1.04799	0.645082	1.01579	0.897161	0.972956	0.879759	1.35264	1.12494	1.26459	1.07934	1.22447	0.827607	1.1033	1.19983	0.856994	0.902466	1.30738	0.962667	0.6017	1.13801	0.826327	0.878431	1.40348	1.01747	0.827946	1.40783	1.33695	0.804959	1.38114	1.14908	1.07586	1.3076	1.35076
31	chr1	16392040	16891016	0.997852	1.19755	1.29183	1.16786	0.73006	0.719337	1.02995	0.661369	0.809411	0.996691	1.10009	0.670069	0.892662	0.933854	1.87628	0.990088	0.70341	1.11309	1.04135	1.19316	0.999057	0.607109	0.531339	0.708165	0.866503	0.880406	1.47876	0.960702	0.877088	1.24762	0.995176	0.698419	1.07265	0.75107	0.508412	0.909196	1.28171	0.614477	1.0493	0.907232	1.20263	1.22147	1.04452	0.948224	0.948729	1.03154
32	chr1	16891017	17095187	0.942288	1.04735	0.986957	1.00181	1.36152	0.888248	1.11407	1.38002	0.925434	1.02217	0.911219	1.27171	1.35465	1.64949	1.70048	0.828995	0.893249	1.07779	1.04767	1.54804	0.837892	0.710065	0.478415	0.760075	1.04561	1.15207	0.992462	0.795136	1.012	1.19318	1.0013	0.840838	1.13708	1.28231	1.29748	1.11096	0.97894	1.3294	0.934805	0.624436	0.804124	0.928513	1.2473	0.971697	0.939793	1.06142
33	chr1	17095188	17565229	0.764887	0.999012	1.15026	1.14152	1.0289	0.892672	0.603988	1.16058	1.14111	1.08383	1.05663	1.08129	0.643852	1.11313	0.948406	0.746604	1.08285	1.15395	0.882173	1.00926	0.805933	0.905361	0.785777	1.23124	0.66245	0.829385	1.19498	0.592922	0.987172	0.66359	0.960822	0.800544	0.668577	1.2375	0.603081	1.14961	0.504673	0.730438	0.948593	0.857431	0.950988	1.25679	1.1711	0.985654	0.686779	0.982839
34	chr1	17565230	18083485	1.13769	0.886474	1.20006	1.10891	0.803822	0.833299	1.24642	0.929849	1.07619	1.31512	0.909159	1.33919	1.11812	0.928728	0.64877	1.20395	1.23463	1.13619	1.10779	0.670535	0.956478	0.884741	0.978605	1.47061	1.04315	0.943433	1.29933	1.28905	1.0028	1.0951	1.07438	1.01024	0.904133	1.23848	0.945642	0.81555	1.05693	1.27837	0.833898	0.952484	1.24667	0.952515	0.901548	1.07656	1.07564	1.0735
35	chr1	18083486	18587701	1.32738	1.1765	1.28087	0.881603	0.906284	1.13697	0.931139	1.43759	0.682925	0.98574	1.07686	1.24172	1.41041	0.758104	1.11058	1.10954	1.27274	1.66733	0.978661	1.11819	1.12721	1.1077	1.12266	0.896163	1.14956	1.08298	0.993167	1.17541	1.01922	1.94453	1.08316	1.00436	0.961011	0.833266	0.877562	0.874973	1.23094	0.796922	0.801932	1.09374	1.47509	1.06112	0.804843	1.10696	1.06484	1.29197
36	chr1	18587702	19113519	1.19536	0.964765	0.808923	0.854931	0.691615	0.823122	0.784388	0.657956	1.1367	1.02515	1.04697	1.28774	1.39305	0.957749	0.9925	0.926598	0.750291	0.858055	0.941484	1.308	1.17145	1.12576	0.888914	1.00193	0.866702	1.0494	0.957013	1.09697	0.912412	1.38344	1.0065	0.971363	1.03544	1.0042	0.837812	1.0841	0.848353	1.00305	1.04811	1.11473	1.00416	1.22196	0.919243	1.16826	0.909487	1.07602
37	chr1	19113520	19594848	0.545611	0.960262	0.939645	0.789315	1.19789	0.757369	0.97037	1.20731	0.974188	1.13173	1.34687	1.16868	1.18534	0.601831	1.05542	1.1052	0.682956	1.21267	1.01378	1.3546	1.07444	0.946365	1.03646	1.18964	1.23547	0.790508	0.650167	0.894003	0.831985	0.881598	1.08789	1.12103	0.847218	0.820463	0.50226	1.35241	1.2934	1.32853	1.12503	1.27858	1.17261	0.960382	0.969928	0.722433	0.786894	1.03639
38	chr1	19594849	20112230	1.21721	1.05002	0.889171	1.33593	1.05923	1.04054	0.827105	0.817627	1.12096	0.949564	1.02863	0.928821	1.27033	1.15885	0.586019	1.01169	1.25832	0.775939	0.810093	1.04553	0.955812	1.34546	0.955549	1.22213	0.853283	1.08958	0.615211	1.18384	0.853244	1.3426	1.02669	1.04	0.668673	1.78933	0.96287	1.06203	0.732746	0.808086	1.08819	1.04048	0.870461	1.18233	0.933071	1.56661	1.13817	1.03582
39	chr1	20112231	20626778	0.801007	0.898767	0.759199	0.88119	1.30545	1.11188	0.881521	1.04748	1.01061	0.944278	0.817085	1.18734	0.730424	1.20773	0.984408	1.29549	1.18517	1.06424	0.917945	0.765151	1.18954	0.822515	1.1051	0.825022	1.1828	1.0614	0.955262	0.589013	1.13296	1.39421	1.0327	0.639337	1.29606	0.829845	0.631905	1.18152	1.0377	1.16976	1.14134	0.975866	1.07848	1.04802	1.30297	0.9564	1.09016	1.15721
40	chr1	20626779	21153878	0.794992	0.656361	1.0761	1.03232	0.733201	1.19632	0.827136	0.602387	0.974781	1.05916	1.14722	0.619246	0.931588	1.13655	1.52359	1.50208	1.25816	0.843493	0.70878	1.23919	1.03462	0.605275	0.995286	0.528475	0.884752	0.931664	0.820219	1.03541	1.27975	1.03249	0.903026	1.35993	1.29275	1.1245	0.586103	1.30335	1.39554	1.27531	1.13986	1.45665	0.836944	0.894632	1.45123	1.26806	1.16015	1.16057
41	chr1	21153879	21724878	1.20881	0.982486	0.959029	0.765846	0.868213	1.17617	0.44667	0.768737	1.32425	1.11948	1.06228	0.911862	1.15063	1.0632	1.08064	1.37158	1.17777	0.950219	0.734158	0.911265	1.0834	1.02493	1.10978	1.23909	1.19357	0.848615	1.31492	0.889539	1.01297	1.42257	0.855376	0.968289	1.05588	1.06182	0.987358	1.31398	0.979046	0.941439	1.09895	0.750872	1.10873	0.846736	0.992152	1.07914	0.8422	0.923553
42	chr1	21724879	22253016	0.862589	1.04262	0.57505	0.740407	1.1424	0.891505	1.17234	1.02587	0.880284	1.04578	1.7079	1.11595	0.734602	1.24654	0.94755	0.777481	1.19117	0.790574	0.949253	1.12466	0.936448	0.904922	0.991905	0.751927	0.915963	0.906131	1.01807	0.754568	1.08016	1.27088	1.02201	0.883385	0.760544	1.18378	0.731616	0.782456	1.11658	0.9729	1.00091	0.856691	0.576384	0.644312	0.585281	0.725606	1.00891	0.848578
43	chr1	22253017	22782741	1.17498	0.654914	0.998213	1.1568	0.551115	1.06138	1.10812	1.26904	0.684898	0.949918	1.04073	0.76161	1.0335	0.936346	1.16634	1.14162	0.79903	1.06149	1.14489	0.577346	1.2283	0.769442	0.884647	1.23138	1.21673	0.887778	0.786987	0.930661	0.97725	1.90101	1.19143	1.16728	1.0972	0.839363	0.835481	0.683645	1.1279	1.34694	1.38031	0.971364	1.13928	0.965356	0.94908	1.26391	1.06239	1.00652
44	chr1	22782742	23305764	0.778475	0.843976	0.961338	1.23916	0.837814	1.04975	1.13873	1.21595	1.38258	1.31933	1.12824	1.21054	0.849644	1.02626	0.484659	1.03199	0.975437	0.799084	0.756697	0.673329	1.07903	0.984828	0.796634	0.862424	1.23637	0.959035	0.744985	1.61683	1.07324	0.894793	1.17276	1.16918	0.975523	1.50868	0.877297	0.802882	1.28268	0.839116	1.11586	0.930848	0.978787	1.03952	0.919423	1.077	0.881044	0.763652
45	chr1	23305765	23866999	1.62189	0.997286	0.949374	0.850366	0.967234	0.96315	1.17135	0.896181	1.20115	1.58753	1.39174	1.17966	0.890386	0.80199	1.00949	0.792176	0.803812	0.926475	0.96005	0.922512	0.921669	1.04831	1.32093	1.26716	1.09474	0.67354	1.27105	1.08022	1.21614	1.7969	0.889555	1.15865	1.3157	0.806923	1.17215	0.926821	1.18676	1.05635	0.93916	0.901504	1.11305	1.17042	0.959271	0.996558	1.07146	0.906422
46	chr1	23867000	24468012	0.76107	0.825769	0.853728	1.14705	1.31234	1.21817	0.934275	0.930116	0.805284	1.18157	1.09675	0.829136	0.820352	1.15831	0.899693	1.00477	1.44911	1.13103	0.905775	0.790531	0.982023	0.990404	1.35406	1.1139	1.1665	0.982498	1.06582	1.04744	0.895406	1.65981	1.02659	0.899081	1.17198	0.887142	1.07132	1.06982	1.05154	0.933282	0.989675	1.05512	1.0086	0.530668	0.943057	1.16734	1.10168	0.909207
47	chr1	24468013	24984290	0.741541	0.767444	1.25938	1.18905	1.22496	1.05718	0.849269	0.938917	1.2825	0.915377	0.788293	1.10678	0.976585	0.448136	0.867576	1.01941	0.978267	0.930904	0.728846	0.984819	1.1231	1.26533	1.06972	0.955795	0.878654	1.02805	0.967207	1.11445	1.37378	1.01543	0.963316	0.764628	0.946718	0.989023	0.959405	1.12663	0.623973	1.01712	0.998065	0.980041	1.0513	1.05472	1.12893	0.897907	1.22936	1.28065
48	chr1	24984291	25535135	0.844169	0.629745	0.859647	1.54594	0.761764	0.953605	1.22368	1.1094	0.981441	0.804228	0.736479	0.96496	0.887398	1.17194	0.915706	0.972565	1.08008	1.1112	1.25434	1.20361	1.1575	1.02409	0.866256	1.15296	1.09949	0.854998	0.948481	1.24018	0.787548	0.810975	1.07181	1.17469	0.885906	1.18669	0.715303	0.970178	1.27218	0.935769	1.15744	1.46292	1.16342	1.19736	1.10193	1.37685	0.948868	0.955633
49	chr1	25535136	26072297	0.945791	0.979697	0.834018	1.45938	1.10283	1.15929	0.834409	0.861724	1.39276	0.709601	1.10949	0.764295	1.02811	0.891518	0.849337	1.05955	1.16651	0.988637	1.09217	0.84504	0.837283	0.941971	0.720128	0.488612	1.02727	0.896373	0.827194	0.989075	0.791687	1.8407	0.871397	1.05806	0.859188	1.15376	0.960885	0.890352	0.94713	0.579151	0.813651	1.07647	1.41159	1.0885	0.784874	1.26457	0.996624	1.00668
50	chr1	26072298	26616722	0.910002	0.609915	0.995957	0.699103	1.07061	0.713545	1.00299	1.21902	0.975395	1.20472	1.03655	1.10327	1.06754	1.09256	0.87709	1.04775	0.954043	1.03445	1.08022	1.04134	0.909473	0.933304	0.881795	1.16131	0.829942	0.848001	1.40429	1.27569	1.29046	0.630311	0.911114	1.20503	1.02788	1.14468	1.04483	1.31182	0.562565	1.72362	1.15021	1.12393	0.972267	1.35034	1.11917	1.20685	0.956484	1.1787
51	chr1	26616723	27190656	0.871068	0.711971	1.36767	1.42482	0.894058	1.21935	1.25861	1.62573	1.07233	1.20799	0.899298	0.723014	1.14571	1.2882	0.751363	1.06592	1.29451	1.31768	1.30151	1.00908	0.954255	0.762136	1.34681	1.15649	1.35032	0.950991	1.08923	0.914405	0.897703	1.21984	1.13714	0.988663	0.865994	0.664318	0.419083	0.675044	0.966512	1.60548	0.786495	1.09149	0.532999	0.823383	1.06422	0.987366	1.34533	0.933502
52	chr1	27190657	27754800	0.926839	0.847042	1.1971	1.10836	1.10179	1.28209	0.852112	0.707534	1.68045	1.11153	0.938451	1.1352	0.810356	0.711513	1.11634	0.898475	0.974738	1.17838	0.908443	1.23262	0.97139	0.825617	1.35355	0.812838	1.02347	0.790888	0.830297	1.93101	0.904956	1.47437	0.874822	1.32309	0.916571	1.29049	1.02168	1.02047	1.35704	2.15078	0.910142	1.28978	1.23782	1.28597	0.978719	1.15631	1.24861	0.922976
53	chr1	27754801	28337819	0.959178	1.00481	1.17326	0.997775	0.98456	0.969013	1.11749	1.69255	1.25718	1.36699	1.48309	1.17839	1.07467	1.0277	1.57749	0.728883	1.65939	1.20029	1.0009	0.799535	0.866298	1.02304	0.813695	0.883743	0.75751	0.98097	1.2346	0.807618	1.23408	1.41377	1.07531	0.794151	0.948784	0.889324	1.2838	1.51294	0.851657	2.10918	1.06014	1.08728	0.972948	1.27889	1.22347	0.829857	1.21472	1.20666
54	chr1	28337820	28925275	1.26674	1.33884	0.95225	1.06252	1.11044	0.986037	1.23827	1.03149	1.34863	0.860553	1.24709	0.958162	1.18559	1.19924	1.20464	1.21409	1.11381	1.15454	1.23458	0.566015	1.22825	0.812936	0.599585	0.695568	1.19187	0.91444	1.06473	0.956834	1.14195	1.35737	1.23307	1.33817	1.24678	1.38816	1.2204	1.61611	0.959725	0.975607	1.22604	1.1129	0.855382	0.776399	1.07577	1.09585	0.898951	1.01801
55	chr1	28925276	29525195	1.1815	1.25569	1.07329	1.25117	1.07891	1.22716	1.00548	1.11939	1.53065	0.901427	1.07937	1.00122	1.00945	1.03882	1.54951	1.09729	1.3849	1.16041	1.03807	1.37151	1.13542	1.16936	0.993676	0.636178	1.06107	0.891735	0.907421	1.28391	0.837309	1.21258	1.22428	1.16486	1.3131	1.18222	1.43239	1.07401	1.05656	1.34546	0.94279	0.886816	1.07067	1.08426	1.08019	0.899509	1.17296	1.10346
56	chr1	29525196	30186066	1.0405	1.43817	0.894968	1.00174	1.41792	0.968808	0.969989	0.94984	0.87644	1.13143	1.07048	1.1337	1.43911	0.9586	1.58371	1.3213	1.94636	1.24511	1.01454	1.35413	0.985957	1.11889	0.83782	0.958602	0.951856	0.98749	0.890403	1.19741	1.2379	1.09209	1.08746	0.841278	1.07036	1.23315	0.836982	1.25626	1.29496	1.20599	1.14387	0.862427	1.20668	1.34614	1.11022	1.29693	1.15745	1.07425
57	chr1	30186067	30712617	1.22614	1.24217	0.98583	1.17598	1.12073	1.44244	1.03996	1.30991	1.15823	0.928141	0.97983	1.1722	1.38777	0.852071	1.1794	0.792933	1.24422	1.02973	0.906889	0.784828	1.03963	1.22179	1.23677	1.14735	1.16566	1.13026	1.06459	0.953543	1.16228	1.45503	1.05113	0.96815	0.885745	1.14626	1.93009	0.970309	1.2178	1.86704	1.23876	1.2236	0.774291	0.93692	1.01239	1.21317	1.31421	0.932507
58	chr1	30712618	31230675	0.971147	0.484185	0.695175	0.8804	0.893131	1.15974	1.47552	1.11485	1.51199	1.57188	1.1824	1.27434	0.55086	0.979712	1.57719	0.794728	0.939214	1.01433	1.54722	1.2405	0.925555	1.0002	0.675157	0.957401	1.03853	1.15203	1.22763	0.632819	0.784369	1.99725	1.11398	1.03665	1.09104	1.06936	0.5026	1.20575	1.00756	1.08866	1.18654	1.00906	0.802047	1.14585	1.06678	1.0654	1.14171	0.909938
59	chr1	31230676	31776539	0.893616	0.75622	0.789057	1.01403	0.756611	1.08643	1.11744	0.951074	0.948311	0.567409	0.860728	1.07417	1.02721	1.01084	1.59191	0.824347	1.1759	1.01786	1.40083	1.12538	1.0146	0.92552	0.832209	0.852264	1.4035	1.00241	0.777196	0.899684	0.797799	0.994318	1.08314	0.92073	1.0984	1.07916	1.10939	0.904891	0.755989	0.917213	0.897596	0.96454	1.19766	1.06149	0.791613	1.12193	0.899214	1.12498
60	chr1	31776540	32278682	1.10143	1.35367	0.808104	0.974237	0.992129	1.0614	0.750601	0.875268	0.636178	0.94998	0.480425	0.761737	0.861544	0.958613	0.874786	0.925664	0.799181	1.02816	1.27952	0.962228	1.17886	0.769582	0.563042	0.998526	0.99267	0.910603	0.889607	1.0344	1.18193	1.05637	0.675537	1.00645	0.828632	1.5217	0.960886	0.732684	0.846004	1.39251	0.751302	0.912397	1.07223	0.868802	0.667992	0.859586	0.715461	0.805368
61	chr1	32278683	32824485	0.770387	0.945881	1.4012	0.953756	1.10713	1.01102	1.18588	0.784763	0.798328	1.06429	1.34773	0.939344	1.14502	0.877945	1.69793	1.03727	1.41974	0.820736	1.17368	1.54547	0.908271	0.628128	0.834007	1.37667	0.761101	0.826493	0.812391	0.520876	0.908371	1.34298	1.10698	0.626831	0.897086	1.27173	0.810368	1.04669	1.31342	0.517743	1.01401	0.936495	1.06327	1.37384	1.03206	0.97863	1.13544	0.92912
62	chr1	32824486	33411502	1.02121	0.70645	1.00638	0.833502	1.31988	1.03575	0.904182	0.822647	1.29519	0.887437	1.30502	1.20238	1.0262	1.11293	1.24099	0.79002	0.829033	0.986084	1.05034	1.01768	0.984035	1.09838	0.918864	0.850175	0.90779	0.97524	1.26416	1.2287	0.772988	1.69248	0.885726	1.34199	1.19311	1.16142	0.930493	1.22812	1.11249	0.982238	0.98045	1.07822	1.08955	0.873097	0.685489	1.31245	0.775223	0.792018
63	chr1	33411503	33958687	1.02089	1.07883	0.876314	0.893235	1.50752	1.00945	0.730218	0.862898	1.04545	0.95823	1.2633	1.06646	1.26402	0.751593	1.01803	0.910115	0.876549	0.954271	0.922316	0.702855	0.819174	0.802488	1.23922	0.881427	1.14912	1.03773	0.857367	0.802223	1.08021	0.945554	0.884771	0.824895	1.15024	0.723832	0.841452	1.22394	0.948135	0.701944	0.830618	0.850632	0.856323	0.809817	0.752627	1.12149	1.23065	0.94854
64	chr1	33958688	34452171	0.804391	0.941521	1.11964	1.04717	1.0028	0.730584	0.588588	1.28062	0.74022	0.658609	1.04625	1.68138	1.01211	1.01644	1.07078	1.12919	0.89337	0.861897	0.972478	1.05722	0.995974	1.0391	1.03507	1.17726	1.39616	0.891453	1.04126	0.796483	0.880674	1.35972	0.730669	0.944059	0.734823	0.660569	0.796926	0.885765	1.4405	0.964286	0.926139	0.719685	0.908689	0.873895	0.909461	1.24503	1.02432	0.924254
65	chr1	34452172	34989422	0.986309	0.897986	1.04661	1.19448	0.845898	0.777629	1.11113	1.40068	0.905566	0.804284	0.884845	0.92206	1.39843	1.13297	0.799089	0.942255	1.20176	1.27024	0.975297	0.517075	1.13516	0.984539	0.922097	1.31795	1.07139	0.98304	1.06286	0.716272	0.734048	0.994697	1.0085	0.92021	1.00234	1.06328	1.14466	0.782784	1.45123	0.648111	1.04452	1.19077	1.16219	0.564555	1.18647	1.42731	1.17197	0.874299
66	chr1	34989423	35549642	0.596823	0.907978	0.814599	1.35035	1.04027	1.00989	1.20524	0.979809	1.38618	0.965786	0.696993	1.21438	1.1601	0.802311	1.37963	0.730955	1.11638	1.05859	0.990464	1.27811	0.987448	0.981388	1.04125	0.854803	1.03402	0.817315	1.06985	1.03762	0.959192	1.40816	1.13942	1.12242	0.959015	0.522699	0.890723	1.2505	0.77001	0.510543	0.841673	1.00918	1.3437	0.599847	0.759201	1.09006	1.05052	1.01167
67	chr1	35549643	36138499	1.04165	1.26692	0.881484	1.21149	0.8547	1.30711	1.28745	1.14777	1.08285	1.18776	0.871291	1.28524	1.03047	0.921738	1.36762	0.87562	1.25187	0.997832	0.898045	0.90813	0.923079	0.622437	0.889374	1.23404	1.38836	0.863416	0.863913	0.927847	0.886724	1.20611	1.12	1.01669	1.06199	0.843464	0.827809	1.01668	1.15479	0.645197	1.17762	1.06273	1.10634	1.29683	0.765399	1.05874	1.10667	0.881731
68	chr1	36138500	36727231	1.07652	1.28654	0.952995	1.4454	0.813941	1.24402	1.27236	1.36015	1.11337	1.03266	0.992871	0.693625	0.958963	0.653012	1.26143	0.941711	1.11486	0.924419	0.855926	0.851113	1.14522	0.915217	1.20107	1.13776	1.12859	0.970642	1.06609	1.18397	1.27119	1.35798	1.12808	1.26638	0.958231	1.38623	1.26186	0.970056	1.12155	0.877411	1.09785	1.03105	0.723863	1.07597	0.947267	0.838456	1.11457	1.08949
69	chr1	36727232	37235739	1.09573	1.05484	1.43991	0.637655	0.70358	1.21366	0.683852	0.814949	1.1219	1.133	1.49934	1.44662	1.22861	0.801857	1.34547	0.825705	0.940194	1.21732	0.841781	1.08527	0.896123	1.50156	0.913771	1.02331	0.818473	1.00335	0.886844	1.36511	0.963466	1.33287	0.92849	0.758397	1.11372	1.47602	0.963238	1.25402	1.35619	1.21708	1.20468	1.09899	0.96956	0.859978	1.1704	0.718892	0.96547	0.885184
70	chr1	37235740	37748931	0.669035	1.04119	1.12925	1.18264	0.873611	1.22167	0.93671	0.93714	0.938309	1.56925	1.50365	1.13842	0.631169	1.03591	0.853715	0.971889	0.973618	1.04089	1.14673	1.08711	0.861191	1.48535	0.744677	0.82102	1.1635	1.26135	1.01235	0.854746	1.19487	1.16565	1.22883	1.28389	0.818255	1.29977	1.01334	1.07316	1.02997	1.13322	1.002	1.04747	1.32837	1.38231	1.14043	0.637713	0.88184	1.18887
71	chr1	37748932	38289538	1.04202	1.03704	1.13042	0.666971	0.544822	1.05143	0.972116	1.36456	0.885394	1.16905	1.12185	1.20665	1.13913	0.949673	0.856694	1.27616	1.28404	0.571831	1.08627	1.08712	0.989869	1.15587	1.25783	0.888406	1.41417	1.11823	1.52217	1.33334	0.945738	1.16573	1.18156	1.17188	1.15104	1.55228	1.34819	1.26386	1.06529	1.13696	0.850346	0.992725	1.2627	0.786865	0.930991	0.958015	1.25736	0.992065
72	chr1	38289539	38829953	1.17793	0.978643	0.666058	1.05122	1.17167	0.95091	0.993874	1.13339	1.20567	1.09874	1.38347	1.32839	0.802137	0.856703	1.17395	1.59301	1.0855	0.792294	0.908275	0.906226	0.862125	1.48628	0.465408	1.31221	1.06237	0.925526	0.931923	0.856808	0.778754	1.49312	1.00183	1.13757	0.935052	0.868588	0.814845	0.818645	1.16936	1.49647	0.932399	0.736449	0.774213	0.874477	1.18056	1.34613	0.940955	0.869215
73	chr1	38829954	39368644	1.03467	1.35168	0.912467	0.930532	1.10626	1.16893	0.933751	0.87605	0.757421	1.30473	1.25345	0.788828	1.28395	1.31775	1.09502	0.824449	0.884211	1.17301	0.841369	1.12879	1.00211	0.983442	1.60904	1.53948	0.975992	1.12126	1.09429	0.940589	0.858238	1.26093	0.808775	0.849603	0.825082	0.967236	1.25739	1.04694	0.916919	1.61127	1.05587	0.889388	0.610164	0.89264	1.18256	1.51607	0.876423	0.954403
74	chr1	39368645	39955961	0.94781	0.845383	1.25983	0.939668	1.04153	1.27021	1.06033	1.2791	1.4235	1.08279	1.28325	1.34129	1.04665	0.929087	0.737237	1.47337	1.04499	0.759087	1.26911	1.26236	1.00602	1.03029	0.9149	0.701941	0.759259	0.994452	0.881658	1.24811	0.939637	1.54176	0.88122	0.823614	1.01187	1.19547	1.17216	0.82959	0.982543	1.08012	1.21148	1.12391	0.787679	0.942593	1.11183	0.859347	0.862129	1.11348
75	chr1	39955962	40517524	0.767835	0.770587	1.08371	0.576201	1.06547	1.41922	0.828802	1.10714	0.74174	0.948519	0.885791	0.89712	0.714699	0.94712	0.852737	1.03248	1.02408	0.97317	1.17769	1.12594	1.06619	1.28709	1.13553	0.984602	1.1323	1.01829	0.809246	1.23349	0.90215	0.55747	1.10536	0.89365	1.28228	1.04145	1.14082	0.781376	1.51015	0.970277	1.18826	0.813768	0.730462	1.0361	1.10668	0.735457	1.01392	1.1512
76	chr1	40517525	41094253	1.18272	1.01737	1.41783	1.27128	0.865385	0.741981	0.918601	1.13606	1.32708	1.33509	1.20294	1.19731	1.10859	1.01181	1.18131	1.49829	1.20072	0.987903	1.18099	1.4847	1.18468	1.00875	1.1123	0.962701	1.25852	1.23443	0.854177	0.874923	1.05444	0.91184	0.895407	0.815779	0.880611	1.36894	1.02121	1.07011	0.724635	1.21291	1.15827	0.821539	0.762847	0.821567	0.913273	1.09403	0.914878	1.02131
77	chr1	41094254	41646374	1.01043	0.314436	1.0224	1.02264	1.06382	1.07556	1.05133	1.63657	1.2795	1.46119	0.886507	0.96273	0.957867	0.872061	0.997746	1.02761	1.03451	1.19537	1.04442	1.07766	0.94013	0.7552	0.867176	1.52403	1.0263	0.997745	0.74448	1.51929	0.92022	1.2518	0.77287	1.00261	0.956306	0.867091	0.789505	0.990566	0.932839	1.29599	0.831167	0.864673	0.974564	0.870064	0.923461	0.811228	1.06448	0.802986
78	chr1	41646375	42165436	0.76999	0.743655	1.17025	0.941219	0.896405	0.884676	1.29455	1.07596	0.584826	0.730416	1.34524	0.894375	0.931559	0.846861	0.820455	1.04244	1.20604	0.809598	1.35025	1.12294	1.10364	1.0767	1.07508	0.792758	0.379294	0.81916	0.854524	1.03631	1.07788	0.774786	1.02665	1.24008	0.980737	0.562468	0.460497	1.35172	1.18649	1.36164	0.898307	1.07022	0.703096	1.08659	1.14059	1.21861	0.919211	0.973453
79	chr1	42165437	42694462	1.06538	0.757114	0.909851	1.00137	1.16936	0.762488	1.09167	1.36858	1.01719	1.24831	0.901676	0.949843	0.768182	1.05059	1.42747	1.20321	1.08834	0.864048	1.03475	1.17833	1.00069	0.83565	1.44483	1.08888	1.41938	1.00253	0.90847	1.42945	0.844606	0.718404	1.05575	1.03628	1.29173	1.10018	0.641043	1.4423	1.14397	1.6308	1.15514	1.06924	1.06841	0.860835	0.801051	0.954211	0.83874	0.916107
80	chr1	42694463	43249010	0.940556	0.715451	0.970638	1.13053	0.79244	0.902763	0.664102	1.26881	1.61088	0.693493	1.11994	0.826811	0.699206	0.710818	0.999302	1.24475	0.769724	1.43483	0.888983	1.14851	0.944646	0.570207	0.838449	0.992781	0.839501	0.962542	0.561376	0.847786	1.06447	1.39105	1.19884	0.739805	1.12065	0.408262	0.793214	1.30871	0.985548	0.824914	1.15112	1.0259	1.07283	0.974467	0.710379	0.852948	0.966481	0.878982
81	chr1	43249011	43794406	1.13965	0.990853	0.672929	0.709877	0.98362	0.952995	0.849042	1.58478	0.928697	0.667479	1.07054	0.904517	0.852829	0.777289	1.53795	0.81094	0.831772	0.864924	1.1544	0.76925	1.06247	1.05928	0.830582	1.1443	0.910569	1.01001	1.10043	0.64397	1.00634	1.06011	0.921568	0.60839	1.05584	0.837799	0.794442	0.94274	0.980679	1.58253	1.30666	1.17325	0.885961	1.23068	0.651226	1.01079	0.923976	0.918494
82	chr1	43794407	44316124	1.24948	1.19898	1.69892	1.14482	0.983897	1.19411	0.894998	1.09814	1.00762	0.747779	0.601204	0.619513	0.731705	1.245	1.34651	1.06886	0.992043	1.26072	1.03751	0.854402	1.02931	0.792665	1.1199	1.18071	0.818617	1.0504	0.963848	0.572791	1.09386	1.10155	0.843419	0.518699	0.775926	0.780522	0.772611	0.871593	1.08002	1.50207	0.919143	0.738534	0.640343	0.968536	1.18643	0.920238	0.838379	0.955959
83	chr1	44316125	44825171	1.18227	0.911859	0.993345	1.1801	0.875112	0.844893	0.865454	0.720222	0.852273	0.866076	1.52549	0.866107	1.12045	0.853902	0.959441	1.39654	1.06024	0.767923	0.873494	1.56885	1.13021	0.923979	0.93181	0.753047	1.00952	1.19302	0.936218	1.04447	0.898681	1.011	1.00285	1.3696	0.904711	0.732135	0.640334	1.221	1.0239	1.98588	1.18023	1.17683	0.937313	0.874301	0.942123	0.708661	0.979499	1.07249
84	chr1	44825172	45381782	0.906042	1.25094	0.890838	1.20321	0.846509	0.922	1.28417	1.05393	1.4103	0.88717	1.19774	0.959788	1.41286	1.00584	0.896054	0.795605	1.23465	0.926815	1.23336	1.1018	0.931161	1.12315	0.849795	1.11569	1.09938	1.07326	1.42835	1.38483	0.89121	1.2975	0.928946	1.28778	1.04412	1.03495	0.944764	1.73779	1.17594	1.50104	1.05026	0.538444	0.674548	0.968807	0.905844	0.748066	1.17845	0.917983
85	chr1	45381783	45982407	0.936078	0.916065	0.943586	1.14299	0.862823	1.0795	0.744796	0.648761	1.0616	0.970227	0.649527	0.912605	1.26912	0.912111	1.37109	1.50448	1.02917	0.80466	1.12004	0.830059	1.02874	0.985308	0.885931	0.920341	0.934589	1.02068	1.13754	1.0112	1.24594	0.98585	1.07202	0.674079	0.716165	1.23991	1.17284	1.28455	1.17894	1.20397	0.938971	0.955716	1.04112	0.737823	0.706694	0.998332	1.13951	1.18739
86	chr1	45982408	46555657	1.10038	0.86719	1.4541	1.04313	0.872973	1.07932	1.07993	1.14399	1.13352	1.37522	1.00204	1.11016	1.29547	0.900864	0.902252	0.91389	0.815779	1.37988	0.902728	0.840044	0.852829	1.00827	1.45463	1.23979	0.867208	1.05862	1.00813	1.08865	1.24078	0.554063	0.917944	1.21032	0.901001	1.19516	1.10507	0.939247	0.812393	0.903439	1.13109	0.932545	1.21241	0.967042	1.12864	0.968997	1.06113	1.02453
87	chr1	46555658	47105707	1.26725	1.18176	1.2627	0.850158	1.24883	1.06582	0.827191	0.903382	1.12107	0.986153	1.0284	0.963358	0.762229	0.980529	1.23052	1.0421	0.524119	1.1136	1.11366	0.92945	1.02472	1.1763	0.835926	1.15598	1.10565	0.796255	0.990967	1.18243	1.09996	1.13521	1.03917	1.43978	0.936097	1.17522	1.38156	0.627501	1.22085	0.934441	1.07054	1.01071	1.27205	0.798618	1.24358	0.944643	0.941399	0.773668
88	chr1	47105708	47670062	1.56527	0.979233	1.45895	1.12807	1.754	0.957462	0.830992	1.0315	1.16871	1.05067	0.79192	0.780028	1.00646	1.38342	1.52785	1.17223	1.23791	0.974068	0.923592	1.02957	1.00083	0.879653	0.973112	0.9272	0.549051	0.959152	0.609112	1.00324	1.17759	0.666512	0.754511	1.0597	0.787004	0.974857	1.11912	0.88365	1.37783	0.803365	1.14716	0.948811	0.749381	0.79787	0.819588	1.09945	1.00769	1.02396
89	chr1	47670063	48225609	1.22933	0.965563	1.07392	0.897736	0.933634	1.28016	1.08584	1.47756	1.68937	0.993541	1.02353	0.660049	0.673419	1.46306	1.44154	1.2911	1.15144	0.826157	0.867298	0.885003	1.0013	0.91044	1.24082	1.22633	0.786808	0.82662	1.28518	0.565456	1.02283	1.08207	1.01159	1.30551	1.40254	0.927328	0.778922	1.39679	1.01865	1.05637	0.89156	1.12583	0.82252	1.07712	1.1593	1.28763	1.19362	0.967135
90	chr1	48225610	48777902	1.09025	0.672942	1.39132	0.931135	1.07622	1.4589	1.27881	0.882541	1.19976	1.3858	0.832958	1.23135	0.897187	1.05914	0.536086	1.03873	1.02723	1.19306	0.873724	1.30723	1.14783	0.740248	1.15676	0.85901	0.850907	1.05652	1.07391	1.41718	0.987998	1.21543	1.10953	0.869146	1.33686	0.471057	0.639152	0.977	0.960323	0.790106	1.07164	1.29813	1.26687	1.26587	1.04056	1.22206	1.02529	0.816147
91	chr1	48777903	49334779	1.0092	1.19894	1.33919	0.958462	0.882073	1.5041	0.949403	1.1976	2.03256	0.790915	1.02336	0.800157	1.5569	1.25717	0.804434	0.887615	1.85174	0.994288	1.1025	0.863364	1.31871	0.761044	1.17098	1.18627	1.03031	1.14915	0.655653	1.19531	1.02381	1.52969	1.09355	1.08306	0.862528	1.05096	0.825477	0.951917	1.10592	1.36062	0.827182	0.779471	1.32796	1.09334	1.29263	1.06457	1.11343	1.11934
92	chr1	49334780	49945727	1.13401	0.949117	1.15887	0.902541	1.12972	1.11963	0.670759	1.09304	1.15906	1.0303	1.01731	0.950612	1.02147	1.07908	1.17078	1.0551	1.30249	1.01854	1.25235	1.43727	0.965601	0.868371	1.26595	0.843135	0.780471	1.11747	1.11991	1.07247	0.895291	0.885578	1.35232	0.957594	0.822272	0.545858	1.01034	1.14096	1.12592	1.2624	1.12953	0.834692	0.757329	0.638282	1.28763	1.56546	1.17736	1.07985
93	chr1	49945728	50600828	1.27064	0.790374	0.785269	1.16367	1.08521	1.11223	0.91108	1.27977	1.66472	0.772742	1.19003	1.01214	1.20011	1.04622	1.28485	0.774709	1.24615	1.19784	0.949393	1.08683	0.960278	1.56915	0.962266	0.746422	1.18075	1.00152	1.01646	1.11297	1.10117	0.709369	0.961713	1.00682	1.05967	0.990409	0.803039	0.944994	1.03869	1.27897	1.12226	0.907542	1.00526	1.18695	0.640632	1.04271	1.11262	0.882466
94	chr1	50600829	51151005	1.14404	1.51071	1.13947	1.21221	1.01952	0.985967	1.47662	1.1611	1.43286	1.05247	1.45453	0.985869	1.26096	0.818563	0.896784	0.97463	1.33856	1.02551	0.948635	1.08812	0.877995	1.04718	0.677754	0.750629	1.18797	1.13648	1.12665	0.87996	0.984036	0.808628	1.10713	0.950878	1.01421	0.823243	1.14537	1.03491	1.43496	0.882289	0.856331	0.724057	1.29617	0.94627	1.16843	1.23493	1.19675	1.22797
95	chr1	51151006	51757726	1.36428	1.21738	0.94755	0.955433	0.809235	0.934179	0.826123	1.26971	0.737632	1.18365	0.857759	0.906511	0.926533	0.864057	1.75367	1.36663	0.608229	1.32472	0.941676	1.523	0.951734	0.951371	1.47181	0.778688	1.2106	1.00141	0.821769	0.80251	1.22723	1.29288	0.998148	1.19364	0.846981	0.811033	0.622392	1.38559	1.10685	1.14127	0.988872	0.945285	0.820008	1.25539	1.03701	1.06458	0.892668	0.945567
96	chr1	51757727	52332791	0.891707	1.25656	0.959585	0.778589	1.13002	0.917897	0.870372	1.17142	1.62397	0.531076	1.04696	1.05043	1.15132	0.73822	0.84442	0.815379	1.29206	1.6232	0.700527	1.26574	1.04711	1.04062	0.966375	0.706224	1.08484	0.959363	0.682842	0.894837	1.12691	1.28437	1.21877	1.37633	1.30247	0.709547	0.927453	1.02133	0.853649	1.12516	0.892607	0.617682	1.05108	0.559105	1.02137	1.09386	1.11373	0.875562
97	chr1	52332792	52882385	0.803588	1.08797	1.52298	1.44352	0.695759	1.30615	1.29105	0.563438	1.16026	0.872425	0.934513	1.07197	1.58804	1.0882	0.780175	1.42124	1.58382	1.25224	1.15097	1.40755	0.939573	1.4229	1.50871	1.51381	1.33668	1.14014	1.23943	1.10309	1.08501	1.46163	0.846157	0.814138	0.67519	0.833567	0.943046	1.19691	0.637898	1.32742	1.20751	0.984795	1.04843	0.829678	0.865301	0.710082	1.23278	0.87887
98	chr1	52882386	53464136	0.774748	0.703858	1.25629	1.20999	0.831386	0.944259	1.48569	0.679997	1.07432	0.958792	1.07521	1.22539	0.885771	1.15404	1.13726	1.08029	1.16512	0.929811	0.557718	1.0691	1.03922	1.338	0.925035	1.13597	0.96406	0.923819	1.62681	0.972411	0.80723	1.43059	1.02168	0.845049	1.0357	0.664524	0.862716	1.37169	1.06449	0.824976	0.761263	1.0094	0.792368	0.765779	0.880906	1.21277	0.895602	0.917685
99	chr1	53464137	53974370	0.920059	1.29812	0.679527	0.848509	1.08535	0.78183	0.827137	1.58081	1.17201	0.805268	1.2844	1.30858	0.97508	0.687175	1.20699	1.09472	0.77367	1.24861	0.962741	1.3201	0.972871	0.958626	1.18545	1.45284	0.721962	1.1099	0.917288	1.38803	0.786386	0.861736	0.8764	1.06243	0.665181	0.974594	0.671444	0.724534	1.48017	1.1438	0.818427	0.999025	0.898149	1.10534	0.789848	0.911385	1.0158	0.957217
100	chr1	53974371	54490830	1.09502	0.931866	0.922202	1.2212	0.995052	0.781014	1.00821	1.10758	0.54705	0.851465	1.21911	0.863401	1.18657	0.892283	1.05937	1.02877	0.971661	1.18677	1.22591	1.19767	1.13526	1.07807	0.880322	1.0744	1.1781	0.801674	0.793652	1.03571	0.769258	1.59183	1.10098	1.05998	0.995429	0.912591	1.25127	1.12346	1.27341	1.46378	1.16224	0.906304	0.820066	0.808313	0.989047	0.763503	0.802285	1.07879
101	chr1	54490831	55017871	0.991933	1.17836	0.610897	0.971458	0.626251	0.888137	0.970339	1.42306	1.12028	0.985676	0.752715	0.790543	1.26999	0.913902	1.11409	0.798257	0.840651	1.41467	0.6421	1.12235	0.867455	1.08184	1.07639	0.925296	1.14058	0.896001	1.02665	1.09307	0.922	1.34863	0.988955	1.44139	1.0033	1.38476	0.83709	0.338113	0.874002	1.20045	1.00398	0.98125	1.40719	0.864428	1.24721	0.946727	0.83055	0.936527
102	chr1	55017872	55545268	1.22023	1.45087	0.882105	0.971624	1.08246	1.13572	0.971767	0.857785	1.17065	1.3158	0.907283	0.964401	0.889716	0.824071	0.584807	0.856195	0.78332	0.946785	0.908916	1.00778	0.758239	0.934135	1.31096	1.12237	0.944333	1.16036	1.3643	1.21844	1.14276	1.23007	0.854176	1.277	0.913177	0.865344	0.67009	1.59163	1.21686	1.13259	1.03241	1.00971	1.10319	0.955391	0.791685	0.991467	1.11921	0.972415
103	chr1	55545269	56071292	0.988411	1.33787	0.992989	0.845889	1.12341	1.19709	1.2645	1.09553	1.15952	0.942739	0.666613	0.775118	1.04142	1.16614	1.44131	0.701368	1.49154	1.17784	1.09656	0.868422	0.827684	1.434	1.10844	0.632493	0.787603	0.916167	0.98386	1.27264	1.00132	1.15776	1.0865	1.00465	1.08357	0.643761	0.88056	1.18322	1.13723	0.893508	0.970273	1.42869	0.758125	0.504849	0.94793	1.04344	0.795047	0.937935
104	chr1	56071293	56612909	0.959822	1.12023	0.983663	0.957515	0.743278	1.04508	0.792245	0.999503	1.01241	1.11197	1.46516	0.647395	1.17022	0.993228	1.06706	1.25967	0.907133	1.09913	0.999791	0.835583	1.05693	1.07662	0.667833	0.864517	1.1724	1.12642	0.857559	0.846771	0.908661	1.12535	0.865933	1.32573	0.799548	1.0208	1.0553	0.909529	1.19264	1.1501	0.815774	1.05508	1.29302	0.963268	1.07869	1.20855	0.978921	1.14394
105	chr1	56612910	57165721	0.914555	1.25807	0.877931	0.804782	1.15514	0.874413	0.62669	1.17104	0.722241	0.928628	1.41481	0.9605	0.741779	1.13933	1.07873	0.901918	0.815631	1.01705	1.03663	0.918595	0.863904	0.942435	1.00345	1.04275	0.681559	1.22482	0.810565	1.0219	0.854095	1.01915	1.03841	0.998882	1.00022	1.33005	1.17604	0.723012	1.08853	0.91391	0.754275	1.31692	0.74255	0.734509	1.05375	1.07215	0.900044	0.974629
106	chr1	57165722	57675614	0.937621	0.974225	1.30703	1.13728	1.06657	0.991062	0.870031	1.37157	0.940379	1.03829	1.00775	1.01912	0.754089	0.987846	1.41097	1.00017	0.669931	1.3812	1.20447	1.0638	1.10764	1.15117	0.706921	1.21329	0.748005	0.934238	1.20867	1.2031	0.883484	1.05706	0.86711	1.08837	1.15084	0.489246	0.648843	0.771044	0.977422	1.17844	0.81355	1.06532	1.31721	0.808486	1.18897	0.86027	1.0857	0.946054
107	chr1	57675615	58207672	1.01537	0.906708	1.14218	0.97286	1.09822	1.14565	0.901645	1.29681	0.693202	1.06319	1.21114	1.0116	0.982875	1.00816	0.918963	1.1628	1.11653	0.739798	0.984052	1.36937	1.13701	1.00997	0.976169	1.77595	0.738758	1.14304	1.17871	0.982945	1.00757	1.24155	1.03534	1.09695	0.805496	0.767011	0.701767	1.0806	0.929177	1.10796	1.07989	1.06918	0.990587	1.20008	1.65871	0.800502	1.01746	1.00625
108	chr1	58207673	58753761	1.33241	1.38012	1.03231	1.04585	0.850101	0.928262	0.980783	1.01887	1.42378	1.0153	0.911647	1.41328	0.672344	1.12204	1.58365	0.96521	1.59016	1.17818	1.18341	1.02157	1.01887	1.35139	1.0716	0.945351	1.03724	1.18338	1.32451	0.848447	1.23664	1.06436	1.1856	1.27754	1.1435	1.00251	1.02665	1.14312	0.805723	1.02703	0.992519	1.32355	1.00181	1.04238	1.25187	1.23865	1.21913	1.2089
109	chr1	58753762	59296770	1.00983	0.978489	1.06284	0.958542	0.947281	0.938408	0.984164	1.31979	1.52673	1.37701	0.894546	1.04929	1.07636	1.09442	1.59824	1.08964	0.954033	1.08841	0.825195	1.37802	1.06892	1.27076	1.68573	0.690146	1.1278	1.06096	1.00528	0.740604	1.23908	1.3445	0.963465	0.956025	1.1234	0.916052	0.605834	0.686166	1.13634	1.07311	1.13979	0.961883	0.853388	1.06578	0.798254	0.95817	1.11171	1.00725
110	chr1	59296771	59806590	0.895478	0.977158	0.837437	1.18795	1.30959	1.00281	0.976723	1.45207	1.03663	1.05201	1.15445	1.31913	1.11867	0.960424	0.954732	1.20148	0.427881	0.870483	0.894554	1.12966	1.00788	0.950992	1.13012	0.868018	0.60863	0.832002	0.995299	1.65866	1.06047	1.1177	1.26607	1.0983	1.2928	1.11074	0.941698	0.75175	0.869912	1.07024	1.02126	1.00411	0.62506	0.797136	1.10604	1.03513	1.09321	1.19071
111	chr1	59806591	60380718	1.04469	1.14849	0.808933	0.763915	0.859484	0.590759	0.724626	1.18802	1.0997	0.969334	1.34641	1.10544	1.19084	0.914049	0.751039	0.775321	0.851772	1.04687	1.11369	0.819481	1.03372	1.13508	0.831472	1.36154	1.03652	1.1951	0.835157	0.637986	1.03004	1.01118	0.934352	1.02574	0.981728	1.09539	0.681237	1.12478	0.869439	1.54318	0.945815	1.01243	0.945637	1.28212	1.16624	1.30148	1.27945	1.22096
112	chr1	60380719	60939726	1.08205	1.25245	0.868627	0.854738	0.996256	1.16686	1.63009	0.916743	1.15363	0.572853	1.45773	1.30899	1.1871	1.0334	1.07425	1.07165	1.19955	0.582627	1.29912	1.12905	1.00265	1.17925	0.812787	1.30115	0.898371	1.05299	1.18323	0.782505	1.42915	1.11513	0.886111	1.28664	1.0793	1.26169	0.930552	1.01633	1.11955	0.931748	1.03428	0.971172	1.15435	0.715081	1.0954	1.16844	1.01577	0.881036
113	chr1	60939727	61522369	1.15498	1.28203	1.25419	0.736408	1.06611	0.984967	1.11953	1.00014	1.00607	1.22471	0.77362	0.897231	1.47504	1.25612	1.22114	1.34272	0.596081	0.842619	1.38405	1.35244	0.817013	1.29385	0.947513	0.785282	1.30704	1.06179	1.18875	0.895108	1.14498	1.06116	1.13483	0.898456	1.31794	0.973019	0.861774	1.25541	1.3367	1.29588	0.929925	0.850248	1.13352	1.19478	0.821036	0.925651	1.24035	1.33894
114	chr1	61522370	62069927	1.09544	1.03601	1.11199	0.899663	1.19192	0.825864	1.11386	1.30853	1.01401	1.08651	1.0804	1.19984	0.71244	0.780226	0.877718	1.01867	1.8237	1.02732	0.880702	0.776816	0.934724	1.23689	0.884444	0.777629	0.816118	0.996173	0.537724	1.26804	0.887262	0.580736	1.04282	0.696433	0.998572	1.10972	1.02444	1.29988	0.815593	1.55638	0.826937	1.2089	0.820114	1.22676	1.00873	0.893776	0.851767	0.89095
115	chr1	62069928	62645996	1.02906	1.59848	1.09807	0.73592	0.907046	1.14902	0.974512	0.822346	1.16601	1.06983	0.829216	1.28922	1.01492	1.07268	1.12819	1.23299	1.19707	1.1575	1.20725	0.940789	1.05542	1.04359	1.33915	1.42728	1.24529	0.982823	1.20088	1.45845	1.01877	1.10233	1.059	0.7841	1.02678	0.977912	0.863297	0.898359	0.857875	0.7464	1.13649	1.2005	0.982061	1.04436	0.978543	0.730827	1.34281	1.07795
116	chr1	62645997	63216789	0.911005	1.95169	0.9429	1.19202	1.27133	1.49918	1.18575	0.979712	1.2642	0.931027	1.10179	0.966932	0.864628	1.11657	0.93768	1.08645	1.2018	1.14899	1.2376	1.00776	0.915306	0.718602	1.5963	0.874808	1.31267	0.76119	1.39275	0.941401	0.981651	0.882837	1.13062	0.956959	0.813019	1.34494	0.680904	1.02418	0.920469	0.83285	1.357	1.08972	0.863789	0.956613	1.12846	0.815395	1.39915	1.2076
117	chr1	63216790	63778331	1.14128	0.67605	1.10831	0.814311	1.01069	1.28168	1.15001	0.997674	1.42847	1.43886	1.14516	0.703215	0.994958	0.989603	1.0606	1.16536	1.08315	1.16149	1.42591	1.06765	0.994355	0.822723	0.992489	0.996013	0.969402	1.0419	1.13821	0.842962	1.02341	1.20056	1.04162	0.794321	0.974699	0.680744	1.0227	1.20731	1.30859	0.945826	1.19803	1.20708	0.819262	1.07674	1.12508	0.957055	1.099	0.855729
118	chr1	63778332	64357321	0.890464	0.809973	0.55316	1.01774	0.853192	1.46183	0.870204	1.0889	1.53316	1.31801	1.06256	0.810141	0.883083	0.99261	1.12221	0.927125	1.86128	1.13059	0.674439	1.01881	0.977027	0.739285	1.26434	1.09623	1.0503	1.07968	1.18212	0.933924	1.19598	1.42123	1.04918	0.830166	1.02705	1.58797	1.20471	1.31196	0.996485	0.721687	0.860736	0.887277	1.08696	0.991533	0.96583	1.20053	1.09443	1.03195
119	chr1	64357322	64893475	0.777489	0.978506	0.932858	1.29834	1.00201	1.10714	1.14859	1.1351	1.57109	1.1354	0.86064	1.64926	0.900424	1.22045	1.03384	1.31936	1.41221	1.12843	1.02766	1.16197	0.776347	0.713636	0.892651	0.58855	1.24441	0.87638	0.598003	0.899853	1.11525	0.794239	0.924056	1.05839	1.02918	0.933114	1.32915	0.983096	0.975435	1.11629	1.01396	1.22848	1.07538	0.476364	1.10298	1.11735	1.15186	0.795501
120	chr1	64893476	65443747	1.02499	1.3833	0.789718	0.882077	0.945269	1.31626	0.973891	1.00715	1.52077	0.95121	0.827722	1.25806	0.734304	1.05479	0.885267	0.869771	1.27293	0.750881	0.889593	0.764145	1.05446	0.738316	0.856956	0.820248	0.740856	0.993595	1.18143	1.82788	0.884716	0.887975	1.0351	1.13939	0.955578	1.44547	0.884061	0.927651	0.585061	0.897854	0.795293	0.935232	0.558643	1.3133	1.05625	1.07389	0.920455	1.04215
121	chr1	65443748	66034896	0.795828	1.24287	0.862108	1.04929	1.20058	1.0367	0.942423	0.90133	1.22308	1.09408	0.891836	1.0913	1.42675	1.03327	1.17062	1.49641	1.06668	1.18111	1.05756	0.884107	0.906409	0.814224	1.44651	0.782371	1.37668	0.911553	1.12178	1.62334	0.804924	1.32545	1.08713	1.3013	1.15722	1.16929	1.03682	1.74697	0.92136	1.04899	0.897188	1.30133	1.02093	1.04554	1.46427	0.921838	0.994729	1.0011
122	chr1	66034897	66634161	1.12632	0.6315	1.11803	1.40863	0.967845	1.04165	0.991412	0.954642	0.833117	0.910108	0.848839	0.954524	1.09359	0.874329	0.90265	0.801324	1.06827	1.17951	1.10905	1.02015	0.917798	0.690105	1.46437	1.02376	1.04197	0.950755	0.924784	0.617304	0.819368	0.936075	1.11123	1.07225	1.06068	0.988885	1.5116	0.438284	1.29716	0.784479	0.980329	1.01502	0.532086	1.00755	1.0375	0.973457	1.03764	0.985921
123	chr1	66634162	67152832	0.816578	0.715122	0.744076	1.71583	0.963466	0.773572	1.46597	1.25014	1.16156	1.04336	0.899396	1.04553	1.02645	1.02622	1.41103	1.25554	0.911409	1.07021	0.999108	1.47156	0.924998	0.965576	1.20415	0.914638	0.96502	0.773371	0.826785	1.2945	0.937101	1.03489	0.993953	1.10385	1.22138	0.894943	1.11931	0.543427	1.09228	0.865311	0.918894	1.09914	0.948274	0.851968	0.619294	1.10941	1.05124	0.853098
124	chr1	67152833	67732351	0.957403	0.836216	0.933078	1.32356	0.907043	1.0774	1.17945	0.855387	1.24644	0.685794	1.24101	0.906265	1.04699	0.785098	1.50199	1.13661	0.898834	0.789754	0.976985	1.22675	0.897864	1.05421	0.873914	0.878225	1.10017	0.759638	1.30508	1.1017	1.03611	1.14138	0.886543	0.891788	0.880473	0.703195	0.982567	0.857725	1.43396	0.985983	1.04092	0.757539	0.812962	1.02543	1.07279	1.14235	1.07198	1.02136
125	chr1	67732352	68276604	0.918484	0.696142	0.971144	1.27799	0.887053	0.818847	0.88343	1.15249	1.38576	0.791198	0.792849	0.987701	0.801662	0.879955	1.00044	1.31785	0.860463	0.565363	0.836231	1.10436	1.12716	1.09469	1.17024	0.713947	1.0897	1.02965	0.997483	0.831758	0.945568	1.12991	0.780687	1.21353	0.812856	0.981981	0.536499	0.752869	0.753269	1.0488	0.832982	0.979413	1.00333	1.41446	0.853258	1.16554	0.863311	1.16239
126	chr1	68276605	68817623	1.02262	0.708202	1.38114	0.939134	0.706985	0.819066	1.11221	0.926143	0.887582	1.50218	0.957469	0.717703	0.7694	0.526824	0.789371	1.42156	0.851132	1.12221	1.01291	1.05075	1.06212	1.13679	0.858569	1.48523	0.956271	0.808684	0.670161	1.06412	1.07397	0.665769	1.05485	1.03398	0.949894	0.609088	1.30591	1.21848	1.37239	1.07251	0.806705	0.929644	0.961497	1.08061	0.960377	1.42009	1.02501	1.04139
127	chr1	68817624	69418625	0.989458	1.38571	0.8165	1.11733	0.921166	1.19767	1.25515	1.20367	1.03646	1.17614	1.4345	1.14453	0.660493	1.17404	1.20081	1.03805	1.21913	0.969558	1.03752	0.861986	0.950117	0.895321	1.22653	0.866219	1.2793	1.02025	0.626884	1.08167	1.01253	0.658511	1.16889	0.783479	0.958409	1.28852	0.973559	0.742215	1.14976	1.06945	0.965759	1.30315	1.06244	1.3325	0.966028	1.04667	0.976477	0.910235
128	chr1	69418626	70050103	0.937508	1.30566	1.26577	0.728395	0.7988	1.06283	1.13423	0.662635	1.41135	1.1309	1.18079	0.815165	1.15857	1.06662	1.07448	1.14519	1.06925	1.14756	0.963797	1.31578	1.05964	0.899006	0.625986	0.882716	0.89087	1.0309	1.01536	1.19478	0.912592	1.17028	1.10135	1.19425	1.02185	0.831411	0.738798	0.796373	0.922408	1.3912	1.17871	1.26306	1.09599	1.06376	0.897294	1.21544	1.05825	1.16868
129	chr1	70050104	70656974	0.903503	1.23843	0.845102	1.12407	0.797377	0.755234	0.943315	1.06378	1.02819	1.08471	1.14556	0.749962	0.891054	0.72852	1.33698	1.25638	1.21047	0.811637	0.711905	0.956601	0.899541	0.820704	1.23104	0.799277	0.886326	0.982112	0.762994	0.937712	0.841353	0.845435	1.16452	1.02778	0.797351	0.714399	0.628509	0.930696	1.04825	1.11591	0.916081	0.940133	1.21172	1.23391	0.978424	1.15642	0.776575	0.91895
130	chr1	70656975	71257566	0.867956	1.5573	0.971047	1.21248	1.10821	1.04738	0.781237	1.24198	1.3051	0.916128	1.23554	1.16553	1.07132	0.961521	0.78026	1.17786	0.691614	1.25606	1.19858	1.37896	0.839925	0.84636	1.00756	1.06791	0.814339	1.1653	0.747438	1.09175	0.914361	1.36118	1.10368	0.896409	1.08193	1.18802	1.19098	1.03849	1.02562	1.09116	0.955104	1.41462	0.770665	0.899209	1.24991	1.11352	1.15046	1.04591
131	chr1	71257567	71845356	1.015	1.0064	1.15702	0.768099	0.746015	0.947354	1.04992	0.877012	1.26588	1.0822	1.25114	1.17872	1.23054	0.850533	0.856855	1.35024	1.13211	1.03553	0.949812	0.658582	0.858802	0.739057	0.893705	1.035	0.90965	1.09554	0.68735	1.23013	1.35917	1.12276	1.00315	1.13155	0.794886	1.29348	0.937659	1.76834	1.06638	1.56658	0.752863	0.760835	1.30032	0.820218	1.05602	0.863058	1.09358	1.10262
132	chr1	71845357	72472429	0.868882	1.54064	1.44106	1.09305	0.750249	1.19462	1.00598	0.952462	1.36528	1.12925	0.884046	1.21808	1.08578	1.13741	1.36637	1.04765	1.07296	1.3254	0.853669	1.06651	1.08953	1.02026	0.782901	1.33315	0.740623	1.1873	1.20098	1.09562	0.938862	1.17225	1.02026	1.26046	1.15725	0.902144	1.51925	1.35077	0.910501	0.978361	0.964116	0.75494	0.864656	0.8343	0.773671	1.0784	1.24782	0.888766
133	chr1	72472430	73144554	1.00412	1.29941	0.857302	0.669961	1.0702	1.28612	1.5739	0.912265	1.26193	1.15287	0.959348	0.763546	1.32521	0.799215	1.08427	1.0798	0.949014	1.30835	1.04065	1.38538	0.960566	0.772263	0.712054	0.523065	1.25234	1.21883	1.08609	0.576811	0.899784	1.37222	1.29752	1.13858	1.07071	1.06626	0.815499	1.1382	1.09627	1.45245	1.00343	0.98457	1.18746	1.32792	0.811555	0.993937	0.938644	0.988004
134	chr1	73144555	73774849	0.799301	1.55914	0.629203	0.810064	0.951597	1.37211	1.01085	0.859006	1.50837	1.05391	0.661282	1.22013	0.692114	1.08179	0.899398	1.25996	1.09242	1.28698	1.01583	0.814749	1.1295	0.936954	0.857926	1.12114	1.07781	0.905331	1.12379	1.3899	1.16516	0.914783	1.11882	0.722072	0.99215	0.778182	1.33864	0.994134	0.810428	1.08863	0.927737	0.859162	1.45349	0.826577	0.896727	1.20364	0.751652	1.00936
135	chr1	73774850	74407237	0.717977	1.64599	0.701561	1.42381	0.932815	0.754427	1.61724	0.927151	0.941586	1.23038	1.66446	0.90604	0.948981	1.31848	1.05863	0.84795	0.767363	1.22789	1.04194	1.06239	1.16299	0.907149	0.960703	1.20771	0.882629	1.21191	1.21144	0.860203	1.04736	1.43016	1.08192	0.964935	0.953094	1.11944	1.19336	1.23181	1.57732	1.46346	0.980724	1.21446	1.07168	1.01613	1.08704	1.24816	1.14108	0.735055
136	chr1	74407238	75045278	1.13682	1.24272	0.997409	1.37422	1.32847	0.956355	1.02297	0.970271	1.09861	1.44109	1.07137	0.961082	1.20871	1.34229	0.967535	1.21514	0.665244	1.23963	0.84543	0.814816	1.20903	0.982548	0.661533	1.12942	1.06377	1.14267	1.30466	1.45505	1.12432	0.803945	0.945639	0.927898	0.878735	0.669948	1.01551	0.844547	0.962668	1.01706	1.06366	0.873733	0.877974	1.42011	1.13496	0.974863	0.814377	1.03823
137	chr1	75045279	75662881	1.44743	1.15542	0.978565	1.34197	1.18471	1.06342	0.774273	1.39241	1.06446	1.26584	1.34232	0.905227	1.20987	0.666539	1.54003	1.37142	0.772268	1.23204	1.00541	1.11102	1.1474	0.736244	0.811176	0.6856	1.32519	1.10001	1.16743	1.14484	1.06163	0.760069	0.940786	0.978684	1.46641	0.880018	1.00094	1.11005	0.955525	0.992752	1.23617	0.88117	1.45106	0.986402	1.06679	0.799463	1.12956	1.1138
138	chr1	75662882	76288206	0.973764	1.34188	0.927074	0.913533	1.20226	0.88767	0.818147	0.744137	1.45298	1.27141	1.17208	0.875684	1.30456	1.01089	0.747605	1.38743	0.650932	1.47257	0.971071	1.21889	1.07365	0.954891	1.05263	1.10937	1.48653	1.0967	0.994556	1.17796	1.0689	1.01553	1.47208	0.946497	1.03592	0.656147	1.23105	1.37305	1.53681	1.34219	1.03539	1.18202	0.936186	0.93901	0.891674	0.97383	0.969288	1.01193
139	chr1	76288207	76875077	1.01089	0.856467	1.00771	1.34483	1.3555	1.21896	0.74427	1.26286	0.98531	1.59046	0.892866	1.36893	0.891381	1.18206	1.26958	1.09731	0.859671	0.695003	0.955947	0.992734	0.975744	1.24258	0.722719	1.30289	1.13717	1.37179	0.779132	0.710766	0.855339	0.809858	1.10805	0.890452	1.09127	0.812177	1.23369	1.01895	0.654017	1.11954	1.01338	1.01633	1.28212	0.856512	1.05501	1.09541	1.14217	1.21596
140	chr1	76875078	77433567	0.849602	1.01002	1.13065	1.15222	1.09148	1.06839	0.748967	1.20781	1.40389	0.664922	1.07818	1.08472	1.2483	1.08638	1.00362	0.950277	0.734986	1.19802	1.2015	0.903106	1.07354	1.16485	1.26652	1.2457	1.11478	1.10014	0.592353	0.974205	1.00785	0.784341	0.949264	1.26201	0.857016	0.906387	1.49968	0.876873	1.08373	0.940351	1.0587	1.11451	1.599	1.15619	1.2498	0.971521	1.13188	1.00675
141	chr1	77433568	78014083	0.880325	0.719124	0.816828	1.02649	1.07185	1.21356	0.710985	1.06779	0.984465	0.81467	1.15086	0.902015	1.17366	1.26665	0.746084	0.802934	1.19205	1.12931	1.26048	0.871401	0.907477	0.777327	0.94742	0.637652	1.02017	0.96471	1.31805	0.877632	1.25715	1.19824	0.754155	1.02737	0.887018	1.11024	1.08981	0.98675	1.48416	1.03644	0.700801	0.865673	0.733157	1.06131	0.868205	0.996419	0.982573	0.986221
142	chr1	78014084	78608752	1.01883	1.06508	1.02707	0.798131	0.811243	1.23295	0.900495	0.976673	0.891651	1.21531	0.969522	0.869188	1.02019	1.01163	0.887209	0.872705	1.00422	1.01214	0.734795	1.32517	1.04548	1.0926	0.708555	1.22584	0.880193	0.839877	1.00251	1.08459	0.82658	0.957875	0.932449	1.15083	0.93577	1.10521	0.799353	0.939283	0.957153	0.953866	0.822449	1.20744	0.766053	0.789694	1.29824	1.03661	0.998174	0.934346
143	chr1	78608753	79191996	0.882195	0.689353	1.48137	1.0455	1.14386	1.20286	1.113	1.08683	1.19439	1.05412	1.13131	0.613494	1.17933	0.887645	0.818977	1.24308	0.918478	0.878379	0.897796	0.667376	0.798777	1.05315	1.38977	1.16386	0.977516	1.11719	1.10431	0.862071	0.757386	1.25504	1.07869	1.34328	1.18286	1.14381	1.08536	1.08991	1.05114	1.73493	0.951125	0.766683	1.06392	0.939252	0.852513	0.832063	0.861289	1.09821
144	chr1	79191997	79812996	0.929369	0.997259	1.2189	0.959573	1.02286	0.964748	0.884016	1.15596	0.634889	0.888435	0.848068	0.934576	0.882196	1.00794	0.77723	1.15475	0.948465	0.825013	1.12697	0.781291	0.809829	0.925622	0.982422	0.732971	0.881693	0.830415	0.842427	0.860196	1.04335	0.577606	1.04515	0.918943	1.01767	1.36085	1.17434	0.553752	0.848042	1.17042	0.968945	0.822078	0.778864	1.13081	0.715409	0.981373	0.779645	0.960962
145	chr1	79812997	80447542	0.964748	1.23866	1.2167	0.986176	0.954239	1.22711	1.1346	0.932933	1.40343	1.21432	0.942266	1.1	1.30407	0.876239	1.1333	1.04025	0.936262	0.90746	0.91953	1.18493	1.01163	0.917797	1.25201	0.877962	0.760563	1.04221	0.935312	0.918712	1.04973	1.16231	1.10806	0.865233	1.21557	0.989084	1.34201	0.966505	1.01563	1.70188	1.16001	1.09267	1.18359	1.01837	1.33057	0.976715	1.01057	0.960098
146	chr1	80447543	81097252	0.7503	0.849155	1.44626	1.15372	1.06229	1.05764	0.818458	0.892838	1.01163	1.44075	0.780331	0.959643	0.9634	1.32453	0.697709	1.07735	0.939234	0.973198	1.09401	1.13231	0.920009	0.80136	1.10497	0.827972	0.784138	1.04677	1.11051	1.62284	1.10996	1.02956	1.05534	0.678195	0.733003	0.501778	0.778513	0.957248	1.55272	1.1588	0.912539	1.13771	0.762624	1.16513	1.01948	0.766855	0.873511	0.875601
147	chr1	81097253	81720993	0.767458	0.704967	0.977048	0.988417	1.17113	1.08126	0.829291	0.814014	0.895415	0.89954	1.30434	1.25023	1.35319	1.01619	0.74725	1.49437	0.961297	1.06322	1.07605	0.533787	1.08363	0.935593	1.09376	0.73727	0.863517	0.827354	0.795393	1.13627	1.0283	0.824585	1.1215	1.10783	1.08208	1.29653	1.4257	1.67295	1.13009	1.00359	0.980862	0.87252	1.25763	1.36716	0.888327	0.920883	1.07568	1.08675
148	chr1	81720994	82290104	1.05356	0.911671	1.00442	1.04576	0.862808	0.968583	1.32485	0.939705	1.28402	1.27117	1.19357	1.54121	0.886466	1.09198	0.993509	0.721128	0.760245	1.04674	1.1314	1.45457	1.09461	0.990609	0.986673	0.844096	1.00516	0.965148	1.0457	1.21939	0.738728	0.890988	0.924457	0.938159	1.01927	0.768477	1.63435	1.44589	0.945141	1.39075	0.965231	0.916704	0.562809	1.02461	0.856596	0.915258	0.902129	1.098
149	chr1	82290105	82880592	1.26036	0.684532	0.822364	1.45253	1.18863	0.922641	0.971135	1.80209	0.88329	1.3089	1.27396	1.30816	0.777913	0.965639	1.11557	0.809821	1.3809	1.24749	0.965666	0.898484	0.967683	0.828399	1.31337	1.34951	1.17795	1.02944	1.0936	1.04267	1.00986	1.60827	1.06991	1.04144	0.874059	0.980378	1.45219	1.01366	0.67586	1.1966	1.01042	0.821004	0.790931	1.21408	1.20383	1.00229	1.13679	1.09283
150	chr1	82880593	83494495	0.973455	0.895908	1.24529	1.06142	1.39866	0.917632	1.0029	1.21452	1.07373	1.49091	1.07767	0.816124	1.2482	0.966591	1.09274	0.881521	1.01706	0.98305	0.857051	1.07452	1.00118	0.843061	1.06806	1.11735	0.68372	1.07642	0.880983	1.48145	0.846204	0.719039	1.09179	0.989805	0.916417	1.08026	1.36825	1.14925	0.953703	0.854291	0.997797	1.19767	1.11818	0.883865	1.60427	0.931395	1.249	0.894816
151	chr1	83494496	84076510	1.04062	1.21362	1.22742	1.32354	1.15524	1.10398	0.81597	0.996221	1.28557	0.974664	0.725828	0.928608	1.48814	1.08424	1.16034	0.830546	1.46645	1.45325	1.18728	0.820967	1.06799	1.34703	1.38798	0.855211	1.04666	0.985702	1.28533	1.50175	1.04308	0.975372	0.935494	0.734628	1.26357	0.950932	0.87291	0.955116	1.08888	1.09101	1.23695	1.18914	1.09797	1.32104	1.16219	0.918921	1.27858	1.17014
152	chr1	84076511	84674563	0.82737	0.939196	0.827602	0.758992	1.05375	1.06353	0.741672	1.17583	0.93647	0.929721	1.52195	0.821405	1.14164	0.779821	1.66933	0.97054	0.697056	0.982364	0.829157	1.0026	1.21262	0.761824	1.18983	1.19745	0.876411	0.918864	0.958233	0.953803	0.917861	0.875215	1.02471	0.878986	0.994656	0.811087	1.10136	0.636307	1.01377	0.947839	1.16291	0.833861	1.21588	1.10232	1.0504	1.2583	1.17034	1.01394
153	chr1	84674564	85228907	1.27386	1.11393	1.26956	0.88899	1.08356	0.706989	0.975879	1.12185	0.723327	0.927998	0.937034	0.970306	1.0793	0.894167	0.541749	1.22734	0.842855	1.65941	1.30638	1.27116	0.926985	0.995889	1.10261	0.986439	0.762859	1.07534	1.06145	0.912916	0.720183	1.1327	0.808726	1.03158	1.0493	1.42223	0.879506	0.845709	1.09754	1.17756	1.3452	0.777687	0.8359	1.09009	0.966094	1.12139	0.993507	1.02245
154	chr1	85228908	85760592	1.01389	0.644371	0.708664	0.918448	1.09631	0.838934	1.03988	1.82644	1.12094	0.931744	0.751552	0.832217	0.981582	0.67165	1.05454	1.07603	0.645344	0.972958	0.953663	0.79617	1.05824	1.22323	1.01491	1.20233	0.98458	0.957851	0.923526	0.898211	1.15758	0.842311	0.889162	1.36967	1.07703	1.27294	0.841112	1.0782	1.10214	1.4061	0.882252	1.09116	0.959251	0.732085	1.34919	0.974678	0.931261	0.994863
155	chr1	85760593	86335646	1.0393	0.979461	1.49524	0.903945	0.942242	0.982621	0.933409	1.16894	0.71399	0.986322	1.09578	1.16017	0.493865	1.17368	0.575125	1.11012	1.62454	1.07536	0.761561	1.19481	1.09662	0.966759	1.16077	1.10069	0.998698	1.06153	1.21959	1.12683	0.997277	1.34386	0.811875	1.27938	0.767849	0.97881	1.0108	0.845797	0.808833	1.20555	0.97898	0.768962	1.62277	0.644745	0.711504	1.2001	1.26347	0.920657
156	chr1	86335647	86956300	1.08763	1.11594	0.716827	1.07681	0.928839	0.94464	0.881275	1.24682	1.33668	0.956686	1.37272	1.10576	1.01126	1.11457	0.897963	1.34073	0.885321	1.16784	0.947422	1.05249	1.04677	0.949941	1.01883	0.883941	1.35269	1.01772	1.01825	0.952032	1.09715	1.06031	1.15778	0.9167	1.20139	0.728165	0.699913	0.993635	0.742247	1.40776	0.895229	1.12507	0.829663	1.06986	1.29515	1.01808	1.20767	0.864154
157	chr1	86956301	87555322	0.643938	1.09224	1.07639	0.683008	0.686619	1.15194	1.47377	0.981006	1.10582	0.941771	1.04269	1.48964	0.78753	1.26161	1.06412	0.941896	1.2888	0.908469	0.982256	1.12604	0.963005	1.14612	0.63781	1.18708	1.24016	0.915035	1.30419	0.800141	1.12931	1.07006	0.999591	0.762945	0.842273	0.806633	0.779124	0.819018	0.743367	0.767892	0.834342	0.97784	1.1592	1.05749	0.863245	0.798866	1.14597	0.813059
158	chr1	87555323	88076806	0.70878	0.673993	1.43653	1.02673	1.06089	0.874454	1.11412	0.975855	0.722256	0.961769	1.2126	1.20063	1.03845	1.56132	0.891121	0.960079	0.987241	1.11885	1.58548	0.538504	0.942442	1.13079	1.07778	0.981378	1.0533	1.06397	1.13469	0.808987	1.16464	0.797608	1.08357	0.998915	1.08725	0.975361	1.28292	0.59541	1.00026	1.17495	1.01597	1.07506	1.14479	1.05764	0.836838	1.45811	0.728619	1.01845
159	chr1	88076807	88632427	0.957251	0.882687	1.16615	1.24225	0.820438	0.975499	0.821923	1.28269	1.20145	1.05963	1.39582	1.1402	0.77652	1.07434	0.795061	1.16478	0.735312	1.20182	0.917573	0.867517	0.880659	0.991905	1.27426	1.17084	1.10008	0.979196	0.910269	0.815992	1.12842	1.50803	0.83367	1.24166	0.880161	0.868498	1.01786	0.857392	1.10287	1.18271	1.12621	1.03517	1.23473	1.25325	0.985586	1.22536	0.950575	0.947695
160	chr1	88632428	89234116	0.910499	0.351162	0.859904	1.00513	0.978976	1.09167	0.946009	1.38938	0.919664	1.02005	1.12901	1.04008	1.29983	1.18463	0.942252	1.29133	1.12958	0.938812	0.978203	1.17276	0.909698	0.984642	0.819943	1.09107	1.18092	0.948835	0.807162	1.15153	1.04619	1.12628	1.07547	0.849426	1.28386	0.952201	1.30504	1.22039	1.38505	1.01072	0.866551	1.03024	1.09391	0.989199	1.14175	1.02274	1.03322	0.75802
161	chr1	89234117	89835964	1.09231	0.799754	0.952317	0.83234	0.992314	1.04462	0.867637	1.27137	0.944242	0.961975	1.06763	1.14013	0.802789	1.26667	1.1678	0.870902	0.631757	1.49064	1.09917	1.04759	1.01235	1.09093	0.811377	0.923783	1.12829	0.969389	1.06703	0.99759	0.950446	0.785508	1.04691	0.704735	0.963045	1.21949	1.15442	1.23566	1.0432	1.05852	1.01214	1.18977	1.1108	0.836988	1.2479	0.848056	1.01768	1.01232
162	chr1	89835965	90417012	0.775858	0.764039	0.941756	1.36502	1.03845	1.20254	1.22952	1.18783	1.08585	0.982918	1.00052	1.07217	1.26495	1.11444	1.4957	0.975666	1.28872	1.34888	0.995056	0.974863	1.18442	0.668982	0.533719	1.06017	0.890361	0.962475	1.0209	1.33703	1.16093	1.30623	0.990378	1.04041	0.959697	0.78984	1.06412	0.478927	0.920592	0.992706	1.22527	1.2932	1.31268	0.90495	1.13231	1.22715	0.850188	0.89654
163	chr1	90417013	90984240	1.15646	1.12971	1.15912	1.11991	0.999828	0.96973	1.27125	0.641491	1.07028	0.967738	1.1765	1.29736	1.44548	1.16059	1.30176	0.909336	0.89581	1.28204	1.01391	0.734686	1.19646	0.930504	1.04423	1.20501	1.32046	1.00411	0.933329	1.11484	0.952267	1.18167	0.980364	1.55176	0.740122	1.00908	0.802018	1.0594	0.929556	2.00818	0.771971	1.36629	1.12148	1.22017	0.767137	1.19495	1.15744	1.03854
164	chr1	90984241	91590270	0.87637	1.34816	0.63974	1.17289	0.959882	1.02044	1.47922	1.12883	1.60713	1.01951	0.802719	0.71344	0.974572	0.857593	0.59605	0.827377	1.4441	1.11136	1.0823	1.21539	1.20489	0.996687	1.02192	0.959932	0.945581	1.06336	0.824007	1.28671	0.876567	1.00341	1.2885	0.783987	1.44486	1.20493	1.29261	1.04565	0.689655	1.77837	1.20152	1.01859	0.657364	1.33617	0.922087	1.43455	1.39828	1.00421
165	chr1	91590271	92184429	0.933335	1.2444	1.25994	1.41696	0.764596	0.890036	1.22005	1.06242	1.15758	1.2782	0.933327	0.951308	0.799086	0.725601	0.975073	0.911988	0.775537	0.821825	1.21243	0.78847	0.930902	1.07398	1.25611	1.32977	1.54341	1.06876	0.955417	1.38082	1.00638	1.06214	1.15575	1.04335	0.936373	1.09172	0.69164	1.37688	0.829184	1.51408	1.03178	1.15726	1.08982	1.25688	0.936405	0.822834	0.998714	1.13415
166	chr1	92184430	92781375	1.21656	1.03068	1.25982	0.668013	0.792991	1.01073	1.03986	0.913089	0.775807	1.31708	1.20889	1.24825	0.617985	1.02842	1.32947	0.78523	0.860552	1.34183	1.16903	0.987252	0.83268	0.978537	1.09016	0.931724	1.04609	0.964041	1.21011	1.1549	0.948738	1.28562	1.03355	1.1299	1.07679	1.27262	1.19149	1.03659	1.24707	1.23013	0.911997	0.8052	1.02111	0.849242	1.10377	1.08305	1.03699	0.863649
167	chr1	92781376	93411980	1.0499	1.07816	0.862735	0.872308	0.922779	1.3052	1.00722	1.30776	1.15135	0.95582	1.33623	1.11522	0.9951	1.2033	0.601866	0.759256	1.21256	1.29579	0.909956	1.25772	0.883241	0.855617	1.22034	1.08455	0.904252	1.10687	1.01433	0.803779	0.623861	1.65935	0.921124	0.928288	0.758007	1.27816	0.875653	0.866397	1.16432	0.902661	1.03602	1.02687	0.977736	1.05116	0.859513	1.06202	1.16492	1.11094
168	chr1	93411981	94022121	0.968891	0.987708	1.20741	1.08226	1.00643	0.822113	1.10328	1.2949	0.849946	1.50668	1.15194	0.843507	0.994887	0.797488	1.05427	1.13122	1.23506	1.06432	1.17247	0.997073	1.16441	0.777596	0.9461	1.0636	1.05122	0.904884	0.629282	1.21177	1.06752	1.50005	1.0025	0.929646	0.784423	1.40859	1.15897	1.19623	0.85744	0.73925	1.18798	1.27404	1.00836	1.06058	0.898969	0.852506	1.1274	0.806829
169	chr1	94022122	94532104	1.03654	0.598634	0.694682	0.897566	1.17599	0.84987	1.17157	1.22847	0.846772	1.30766	1.18119	0.876613	0.989726	1.05946	0.893276	1.31662	0.528353	1.1035	0.898523	0.93897	0.962984	0.810765	0.802904	1.25034	0.608392	0.987012	0.903114	0.984678	1.16724	1.30494	0.862493	1.10015	1.10485	0.598009	0.645957	0.900589	1.13976	1.08777	0.945131	1.15637	1.05365	1.69494	1.0863	1.13261	0.984891	0.964839
170	chr1	94532105	95085962	1.3888	0.935587	1.4608	1.10304	1.03923	1.24743	0.66076	0.928981	0.803873	1.08147	0.959628	0.359329	0.734	1.05456	0.791548	1.21784	1.40104	1.19373	0.981738	0.891511	1.0891	1.32249	0.931818	0.971713	0.771619	0.938105	0.989735	0.807878	0.807331	0.532752	0.910874	1.24254	0.976151	1.26857	0.777681	0.927003	0.78955	1.12772	0.840382	0.934132	0.775796	0.64215	0.80728	0.75199	0.96281	1.14071
171	chr1	95085963	95614269	0.826412	1.07068	1.09602	1.07262	0.884478	1.089	1.16115	0.774698	0.761415	1.18706	0.862332	0.867651	0.986568	1.02984	1.28267	0.994783	1.16271	1.29706	0.805227	0.551954	1.09143	1.25619	1.51763	0.800201	0.75613	0.872262	0.706791	0.92167	0.664224	0.67575	0.895754	1.04336	0.72226	1.1142	0.305022	0.841005	0.906066	1.33324	1.14292	0.898193	0.97417	1.17878	1.25302	1.18747	0.735262	0.909828
172	chr1	95614270	96185750	0.868371	1.22198	1.42677	1.07778	0.735881	0.962258	0.634093	1.49351	1.06684	1.06261	0.729972	0.972849	0.839006	1.11933	0.905529	0.814959	0.770906	1.43972	0.744855	0.788392	0.947588	0.805593	1.39639	1.32017	0.902392	1.06811	0.777242	0.736434	0.724908	1.21541	0.920778	0.892525	1.00643	0.955318	0.864711	0.896888	1.1753	1.0963	1.11657	0.882996	0.964948	1.26273	1.2478	0.82249	1.19455	1.04324
173	chr1	96185751	96773407	0.92332	1.32094	1.08668	0.979066	1.09926	1.1155	0.739527	1.1953	0.935827	1.24893	1.2818	1.31099	0.766642	1.03987	0.989105	1.02819	1.22065	1.20365	1.44553	1.14688	0.926135	1.32886	1.13064	1.10159	0.877713	1.14178	1.06799	1.08614	0.930495	1.09118	0.922046	0.767717	0.755883	1.49608	1.21106	0.879481	1.27112	0.99348	0.804018	1.13661	1.19901	0.956319	0.929793	1.05645	1.15363	0.699012
174	chr1	96773408	97369806	0.977206	1.28275	0.825933	0.685493	0.890537	1.14025	1.05405	1.68416	1.28007	0.86486	0.976311	1.2135	0.938053	0.825586	0.898755	1.23059	0.929778	0.810086	0.833542	1.19832	1.00336	1.10563	0.708243	0.830029	1.17698	1.08287	0.658225	0.994382	1.28261	0.924698	1.14767	0.914333	1.01857	1.06949	1.06885	0.909413	0.956792	0.847118	1.12241	1.15135	1.06543	1.21316	0.839635	1.08065	0.93233	0.909895
175	chr1	97369807	97970896	1.09269	0.683356	0.856447	0.736551	0.726551	0.942007	0.623622	0.950445	1.34124	1.15197	0.78865	1.19711	1.05156	0.967273	0.68457	1.03051	1.14412	1.46941	0.87769	0.920276	1.03678	1.04514	1.20199	0.822506	1.26516	1.0031	1.16136	0.80785	0.987082	1.01134	1.01715	1.10894	0.834625	0.742267	1.11508	1.16327	1.08866	0.880599	0.925487	1.53237	1.17174	1.26891	1.06439	1.0968	0.957431	1.01173
176	chr1	97970897	98578727	1.25592	0.597465	1.30223	0.863972	0.997647	1.132	1.10113	0.899179	0.78347	0.7352	0.772648	1.21963	0.962723	0.863535	1.31621	0.776447	1.10726	1.30449	0.592762	1.08288	1.0051	0.860282	0.873682	0.761779	1.15443	1.05144	1.16489	1.00034	0.949402	0.706057	1.11592	1.04804	0.758716	1.20396	1.18311	0.609965	1.28791	0.914837	0.933508	1.06978	1.05771	1.11475	1.2905	0.965549	0.949893	1.02622
177	chr1	98578728	99172535	0.955398	1.08133	1.38435	0.879348	0.991232	1.07405	0.813656	1.38791	1.42483	1.23577	0.648977	0.926122	1.15041	0.960618	0.756076	1.05626	0.860389	1.22803	0.66271	1.007	0.807407	0.727704	1.43756	0.998881	0.820881	1.04016	1.45931	1.20948	0.814676	1.07434	1.13508	0.866105	0.994571	1.14214	0.844082	0.588995	0.893956	0.96169	0.828278	0.608462	0.808987	0.914576	0.81208	0.7158	0.752475	0.930909
178	chr1	99172536	99790172	1.10447	1.35126	0.893703	0.885038	1.3246	1.18286	0.992211	0.625446	1.14519	1.41331	0.999428	0.843034	0.761542	0.65965	0.945564	0.715682	1.38577	0.910976	1.10634	0.672021	0.934486	0.629486	1.07872	1.13865	1.1667	1.04219	1.37339	1.15652	0.707704	1.28726	1.11163	0.765624	0.92142	1.1479	1.20902	1.07526	0.921583	1.22924	1.03792	1.01531	1.45076	1.23663	1.15664	0.876114	1.01817	0.997079
179	chr1	99790173	100382303	1.09679	0.742696	1.17625	1.12	0.766217	0.886027	1.15216	1.52044	0.726416	1.13502	0.910238	0.699707	0.928638	1.0539	0.978897	1.17728	1.06947	0.960443	1.10764	0.998076	1.058	1.03875	0.990992	1.11859	1.16415	1.11126	1.35429	0.861249	0.989359	1.27277	0.977106	0.974092	1.02162	0.667872	1.45937	1.20816	0.973048	1.02826	0.981044	0.762552	0.984348	1.19907	1.02646	0.895343	0.932647	0.893098
180	chr1	100382304	100970376	1.10967	1.67342	0.887684	0.962259	0.975786	0.922642	0.916889	1.12539	1.24642	1.18702	0.857633	1.00481	1.0176	1.0585	0.908048	1.13904	1.21914	1.11479	0.864373	1.12666	0.871178	0.929961	0.813735	0.991896	0.781277	1.14054	0.995171	1.10915	1.16283	0.75671	1.00849	1.32154	0.780827	1.62865	0.867821	0.937436	0.95421	0.830924	0.915615	0.959912	1.39027	1.32729	1.03853	1.11132	1.09473	0.878467
181	chr1	100970377	101575036	0.975223	1.54189	1.27582	0.885282	1.0127	0.834116	0.910669	1.0074	1.24933	0.930165	0.643845	1.18802	1.18703	1.17827	1.12773	0.919115	0.722988	1.0909	0.669425	1.25718	1.03007	1.0204	1.02163	1.16507	0.787548	0.966766	0.898107	0.752908	0.886043	0.607911	1.05205	1.34743	0.99806	1.28711	0.617475	0.826865	0.921548	1.42521	1.07859	1.06903	1.16038	1.22378	1.58963	0.837465	1.24501	1.34034
182	chr1	101575037	102162511	1.05554	1.49707	0.692018	1.37842	0.602122	1.03551	0.982751	0.808296	1.06162	0.845319	1.29755	1.07485	0.828251	1.01683	1.28129	1.32305	1.25099	1.13717	0.833102	0.896616	0.911921	1.05179	1.43715	0.984041	0.905565	0.892841	0.962776	1.21033	1.0327	1.03674	0.974092	1.25849	1.06651	1.14158	0.751588	1.30562	0.914217	0.839281	1.07583	0.929335	1.22668	1.38025	1.47268	0.902046	1.29001	1.05516
183	chr1	102162512	102821319	1.13139	0.846735	0.961991	1.15552	1.06057	1.2487	1.13157	1.26917	0.892197	0.973416	1.01143	1.11064	0.902782	1.06721	0.891071	1.27341	0.759355	0.780436	0.599605	1.16006	0.896969	1.26131	0.908389	0.849688	1.28723	0.842942	0.997693	0.990731	0.987063	1.40452	1.03725	0.820436	1.11416	0.783697	1.08545	0.949154	0.802114	1.05356	0.795139	0.885953	1.03447	0.927405	1.30697	1.09311	1.08002	1.02155
184	chr1	102821320	103522641	1.33939	1.03849	1.19923	0.86128	1.11383	0.940117	0.964717	1.13761	1.23146	1.27405	0.97608	0.931021	0.995324	1.23057	0.967835	1.33155	0.990219	0.744815	1.1882	0.946716	0.907839	0.946878	0.809032	0.99916	0.983133	1.0551	1.35762	0.748838	1.03392	0.89232	1.28256	0.989168	1.3499	0.636919	1.15399	1.00662	0.831628	1.29404	1.00007	0.886465	0.950194	1.16752	0.712244	1.07908	0.701621	1.16994
185	chr1	103522642	104275074	1.18674	1.87748	1.00734	0.929282	1.35774	1.08032	1.14577	1.13516	1.17329	1.49122	1.58668	0.894292	0.996783	1.06115	0.933996	1.29051	1.33887	0.766215	1.04571	1.26946	1.39869	1.05348	1.21221	1.08638	1.26759	1.09919	1.5095	1.34042	1.31272	1.38503	1.1729	1.25849	1.12864	0.768467	1.30205	0.642152	1.10527	1.35928	1.0309	1.05706	1.14768	1.35284	1.16828	1.32853	1.07252	1.46929
186	chr1	104275075	104935505	1.16576	1.671	0.72819	0.877156	1.08583	1.00267	1.34802	1.30756	1.65535	1.25689	1.38602	1.07593	0.963018	1.17876	0.816171	1.2639	1.26431	0.923877	0.771012	0.997865	1.07832	1.0258	1.01365	1.16569	0.899699	1.07591	1.33993	1.58288	1.08615	1.09227	1.06316	1.0775	1.12873	0.948169	0.502343	1.05415	1.10279	1.21735	1.0827	1.35192	0.900859	1.08604	1.03239	0.998953	1.24274	1.15504
187	chr1	104935506	105624180	0.961923	1.48148	0.959249	1.08627	0.999454	0.805803	1.34522	0.962524	1.18565	0.878645	0.892468	1.41815	0.840956	0.808968	1.08401	1.30424	1.23997	1.14743	1.10938	1.51361	0.850961	0.976088	1.39164	0.894749	0.868941	0.972074	0.858109	1.13919	0.79645	0.483559	0.893127	1.07582	1.06692	0.707227	1.21586	1.18842	1.05651	1.06935	0.988591	0.794578	1.35864	1.11419	0.924599	1.0578	1.17377	1.15064
188	chr1	105624181	106333559	1.21529	0.641828	1.05056	1.39839	1.00155	0.800332	0.947898	1.30172	1.37097	1.16816	1.24656	0.996526	1.00613	0.976067	1.42268	1.13449	0.906052	1.0049	0.801536	0.968483	1.07406	0.917178	1.12733	0.877569	1.19419	1.1623	1.26681	1.38372	0.963054	0.749801	1.0596	0.734588	0.922197	0.983305	0.96987	1.11524	1.14983	1.15776	0.882553	1.15208	1.00321	1.19061	1.04063	1.2042	1.1441	1.06859
189	chr1	106333560	107010452	0.983281	1.26998	1.2212	1.08602	0.854187	1.13961	1.44893	1.06552	0.976238	1.22912	1.78435	1.03193	0.721484	1.12082	0.820036	1.12381	0.726944	1.21986	0.549469	1.11171	1.16077	1.02297	0.987854	0.873298	1.10395	0.986862	1.15019	1.06595	1.09343	1.05993	1.01846	0.871467	1.01169	1.18146	1.33659	1.10491	1.01062	1.15632	0.979623	1.2038	1.06843	1.22468	1.24993	1.06518	1.11579	0.998522
190	chr1	107010453	107647138	0.934116	1.35154	1.31161	0.956953	0.825973	0.74207	1.41534	0.925327	1.62877	0.679736	1.17427	1.06649	1.25185	1.08081	0.966106	1.31311	1.29059	1.00204	0.806664	0.898313	0.994954	1.84937	1.12963	1.27649	1.11431	1.02343	1.00327	1.13398	1.08614	1.154	1.17594	1.17543	0.895137	1.18047	0.84413	1.45308	1.27333	1.13153	1.22218	1.14678	1.06888	1.1146	1.03619	1.06408	1.16834	0.930962
191	chr1	107647139	108209610	1.13261	1.06839	1.2454	1.16311	0.995095	1.0792	0.965882	1.07129	1.20484	1.12378	1.21172	1.3151	1.38784	0.785117	1.19382	1.05272	1.06315	0.789653	0.978325	1.1385	1.00976	0.994046	1.38505	0.966708	1.13044	1.10997	1.12492	0.775757	1.0002	0.652792	0.887232	1.14932	1.1287	0.952449	1.22671	0.573215	1.73904	0.966454	1.0567	1.18778	0.812023	1.19668	1.16141	1.01804	1.0116	1.04215
192	chr1	108209611	108790410	1.34763	0.851376	0.991551	1.25338	1.40092	0.886981	1.22835	1.30893	1.0053	1.21105	1.09584	1.13016	1.14322	1.16779	1.27696	1.24933	0.717291	1.31979	1.29356	1.05093	0.996567	1.17901	0.985592	1.29749	0.947173	1.07783	1.20962	1.03394	1.19553	1.34601	1.00973	0.850845	1.28624	0.99349	1.38744	0.957992	1.37736	0.935284	1.02069	1.24986	1.09081	0.906972	1.39631	0.906137	1.29517	1.10718
193	chr1	108790411	109312955	1.15451	1.02025	1.37897	0.935449	1.38859	0.80968	1.36452	1.1996	1.27763	1.33051	0.714147	0.986101	0.989189	1.19388	1.07917	0.804111	1.70621	1.1738	1.05355	0.974982	0.973862	1.26475	1.21428	0.936856	1.22624	1.01379	0.898292	0.982743	1.16342	1.06359	1.07925	0.939706	1.18582	1.36401	1.58699	0.99685	1.05081	1.19518	1.13618	0.898384	1.60337	1.37012	1.13589	0.930068	0.674254	1.19235
194	chr1	109312956	109881076	0.892254	0.996138	1.22323	0.931858	1.18673	0.983019	1.07749	1.00162	1.62317	0.805692	0.851888	0.764307	1.25315	1.11404	1.09973	0.88002	1.1154	1.10062	0.877494	0.907167	0.972108	1.11955	0.922948	1.09419	1.07262	1.08277	0.87061	1.07383	0.98533	0.951368	0.857995	0.956319	0.894488	0.972422	0.915565	1.43135	0.914197	0.616097	0.936802	0.650538	0.904789	1.36544	0.781307	0.816478	1.14924	1.00071
195	chr1	109881077	110383595	0.68868	1.21612	0.493516	0.976214	0.802577	0.953153	0.70754	0.690886	0.782255	1.01884	0.963597	1.38937	0.620369	0.932973	0.820138	1.74194	0.785735	0.86491	1.28649	1.11909	0.969384	1.05945	1.14705	1.11259	1.06228	0.842932	0.859813	0.874184	0.920754	1.25297	1.12262	1.21696	1.19074	0.837877	0.79458	1.0369	1.20966	0.899411	0.686031	0.810151	0.820362	0.900596	0.651193	0.728813	1.05301	1.01517
196	chr1	110383596	110886689	0.934952	0.775846	1.174	0.786364	0.902545	0.844729	1.08194	1.0581	1.25662	1.29629	1.18009	1.31753	1.15901	1.09352	1.01455	0.971479	1.05731	0.933978	1.16228	0.953771	1.02229	0.65999	1.43426	0.981847	1.04168	1.05394	1.40208	1.04478	0.853021	1.16205	0.80654	1.13665	0.794107	0.889581	0.941031	1.31846	1.05687	0.811111	0.774559	0.973588	0.871849	1.34129	0.873832	0.732671	0.846742	1.05934
197	chr1	110886690	111420648	1.20881	1.07183	0.828273	0.879281	1.03241	1.03778	0.755927	1.30678	0.958905	0.983801	1.06238	0.911843	0.843948	0.850599	0.982397	1.12769	1.0033	0.72082	0.978796	0.810104	1.28035	1.09102	1.10981	0.762495	1.31606	1.03938	0.821861	2.00143	1.05343	1.37679	0.866607	0.968299	1.12053	0.969517	0.835482	0.963607	0.947441	1.12353	1.14614	1.26041	1.01374	1.28462	0.837151	0.764363	1.20933	1.00233
198	chr1	111420649	111996937	1.31068	1.1919	0.444569	1.38736	0.792722	0.985061	1.01362	1.036	1.05278	0.938612	1.09271	0.628291	1.22613	1.17029	1.17467	0.985453	0.850885	0.945724	0.661811	0.660502	1.06889	0.945945	1.02279	0.966257	1.12557	1.08585	1.02874	0.894189	0.858939	1.10623	0.878927	1.19364	0.80909	0.63256	1.11103	0.735566	1.07314	1.44593	1.05137	1.09194	1.26028	1.63164	1.01086	1.15474	1.00813	0.934165
199	chr1	111996938	112507588	0.97146	1.24509	0.781531	1.1112	0.853353	1.38599	1.02538	0.582189	1.56265	0.642645	1.07812	1.12842	0.781768	0.970233	1.22884	0.798977	1.17527	0.660837	0.930376	0.795265	1.05147	0.931355	0.87624	1.05362	0.940329	1.08685	0.978576	0.713459	0.940873	0.678895	0.859145	0.716016	1.37766	0.689245	1.02021	1.13466	0.697686	0.773492	0.775259	1.09677	1.07032	1.00291	0.925949	0.792245	0.926504	0.785076
200	chr1	112507589	113064713	0.98859	0.716901	0.864838	0.660721	1.08212	1.12447	1.47765	1.39206	1.01	0.984897	0.830831	1.03937	1.04448	1.34515	1.27702	0.910809	1.10232	0.59773	1.22888	0.709495	1.00604	1.26366	0.846981	1.17108	1.22954	1.04438	0.786268	1.42203	0.956062	1.34094	1.25601	1.32019	0.886714	0.969339	0.8036	1.41132	1.22383	1.17833	0.94504	1.43365	0.993296	1.11653	0.840137	0.916769	1.2739	1.04655
201	chr1	113064714	113646617	0.822081	0.658264	1.26146	0.932864	1.15667	0.93834	1.31758	1.31853	1.42649	1.0363	0.98518	0.793079	0.844588	1.08683	1.09736	0.883513	0.842835	1.27431	1.00825	0.901655	1.06838	0.679671	1.38134	1.18745	1.00853	1.01612	1.35053	0.80642	1.0912	1.57804	0.938646	0.883879	0.935351	0.968553	1.06863	0.871481	0.568499	0.777033	1.15118	0.972089	1.03166	1.19023	0.935443	1.33467	1.13132	0.989524
202	chr1	113646618	114246719	0.852302	0.805292	0.872638	1.22464	1.11011	1.01401	1.2285	1.60807	1.04783	0.925279	1.64492	1.27477	1.49174	1.27105	1.22786	1.01316	0.927945	0.846195	1.11615	1.24127	1.01349	0.962651	1.0972	0.957093	1.13009	0.995364	1.30893	1.1591	1.25191	0.825751	1.11814	1.01924	1.26347	0.871856	1.09939	1.29669	0.977414	1.24778	1.0761	0.858203	1.05767	1.13756	0.567018	0.675099	0.885687	1.20434
203	chr1	114246720	114775197	0.698939	0.812629	0.621294	0.987889	1.11312	0.719573	1.31717	1.10111	1.18394	1.03916	0.906899	0.873018	0.815955	0.94559	1.04671	0.973005	0.954045	0.825385	0.964862	1.10577	1.11694	1.14105	0.69007	0.910323	1.49812	1.07353	1.19802	0.960232	1.14022	0.880789	1.08959	0.569098	1.3983	1.25047	1.64871	1.0263	0.632573	0.963487	0.83184	0.986342	0.929631	0.939344	1.03895	0.948655	0.772465	1.11837
204	chr1	114775198	115369574	0.98081	0.918777	1.24662	1.38221	0.973653	1.16352	1.39122	0.93214	1.22813	1.20181	0.859709	1.18791	0.870916	0.890973	1.19993	0.82099	0.949067	1.32078	0.883538	1.10735	0.929468	0.999559	0.910842	1.26543	1.54116	0.988712	0.955086	1.07653	1.00451	1.36702	1.15405	0.86422	1.50013	1.20667	1.07757	1.48508	0.793376	1.16782	1.12228	1.02846	1.11829	1.14112	1.11545	1.21398	0.974842	1.08389
205	chr1	115369575	115913808	0.86418	0.450953	0.615696	1.05307	0.879998	0.939956	0.978074	1.15503	1.12862	1.05757	1.0075	1.01174	1.41779	0.922799	1.44753	1.18041	0.860705	0.65475	1.086	1.19496	1.16747	1.02137	1.29772	1.33358	0.927294	0.938798	0.828294	0.994381	0.836931	0.748104	1.03493	1.04923	1.33013	0.618925	0.958275	0.871795	0.954513	1.463	0.985871	0.977434	1.06104	0.905273	1.28853	0.995011	1.02251	0.95823
206	chr1	115913809	116452002	1.02528	0.469067	0.987983	1.00753	1.19288	0.844044	1.08526	0.954469	1.18896	0.88337	1.35427	1.26249	0.95998	1.14041	1.00316	1.11376	1.35696	0.745642	0.88795	0.924846	1.16604	0.959786	0.931178	0.827447	0.982483	1.03575	1.27701	1.26253	1.07032	1.17935	0.98502	1.21689	1.28152	1.14361	0.435698	0.881528	0.954555	1.0737	0.997261	0.91894	1.2769	1.2147	0.845225	0.904573	0.815526	1.09693
207	chr1	116452003	117008723	0.939346	0.723114	0.932659	0.879202	0.909668	1.37992	1.49067	0.537448	1.19269	1.12024	0.988856	1.12878	1.27742	0.774663	1.04779	1.12357	1.06654	0.971654	1.10276	0.860642	1.11481	0.824035	0.917881	0.742099	1.05493	1.0844	0.72061	1.02076	0.650865	1.06919	1.09491	1.24435	1.1003	0.81068	0.792494	0.743066	0.83571	0.853272	0.701249	0.728907	1.60443	1.15271	0.866747	0.897414	1.00714	0.999167
208	chr1	117008724	117543074	0.774596	1.35826	0.662905	0.66862	0.907645	0.844714	0.874077	0.686381	0.819119	1.05226	1.16848	0.804541	1.15248	1.04291	1.1559	0.871347	0.542392	1.24942	1.00419	1.12073	0.945734	1.11426	1.31562	0.939288	1.04896	0.944204	0.974487	0.535485	0.940644	0.64316	0.987052	1.31691	0.989455	1.17055	1.45042	1.21959	1.09819	1.2365	1.13528	0.875716	1.33257	1.00334	1.0066	1.02866	0.802405	1.02297
209	chr1	117543075	118119076	0.938951	1.29336	1.07499	1.06727	1.09012	0.962823	0.971806	1.18937	1.08127	0.966258	0.853234	0.949403	1.84907	1.07582	1.28489	1.08149	0.993374	1.02788	1.19395	0.666388	1.16232	1.29822	0.794783	0.781102	0.861876	0.945691	0.859299	0.859547	1.15411	0.719993	0.975154	1.0312	0.959577	1.19178	1.31245	0.753806	1.40019	1.19385	0.946718	0.668364	0.743857	1.40578	1.077	1.04166	1.12036	0.848192
210	chr1	118119077	118650750	0.85002	0.644783	1.23179	0.897972	1.18302	0.961477	0.902012	0.918557	1.16451	0.868172	0.819181	0.682251	0.58	0.800695	1.3751	0.993182	1.38241	0.6637	0.98059	0.793789	0.936528	0.771133	0.907822	0.780653	1.44633	1.03228	0.795596	0.945134	0.851097	1.12218	0.930572	1.06436	0.792886	0.976545	0.743044	1.04422	0.699074	0.696551	1.2134	1.25956	1.11529	1.02525	1.35208	0.846529	1.20431	0.914031
211	chr1	118650751	119235421	0.857581	1.57809	1.21473	1.01743	0.7769	1.08239	1.07489	0.909427	0.977865	1.11586	0.976943	0.747874	0.84988	0.94347	1.07373	0.985672	1.23229	0.967742	1.01064	1.29949	1.00696	0.681754	0.840777	0.784503	1.1958	0.892366	1.43056	0.661459	1.10832	0.648684	1.11753	0.811313	1.08153	0.753718	1.58356	1.00691	0.859337	0.860939	1.03649	0.862847	0.765775	0.938858	1.3937	0.869101	0.999681	1.16062
212	chr1	119235422	119819469	1.11396	1.20211	0.733381	1.2135	1.01546	1.00375	1.33606	1.30522	1.33197	1.16716	0.89442	0.799949	0.705297	1.10179	0.746205	1.09257	1.15893	1.03893	1.05729	0.828328	1.00616	1.01135	0.785621	1.07088	1.37359	1.08087	1.11728	1.06063	0.854774	0.726986	1.21114	1.12604	0.859565	1.14351	1.19291	1.1255	1.27779	1.1589	1.02899	0.847864	1.16661	1.22502	0.809421	1.20315	0.877531	0.890961
213	chr1	119819470	120368499	1.026	1.92657	0.698161	1.34687	0.861703	1.05699	0.913829	0.933179	1.15222	0.669264	1.09184	1.12426	1.04443	0.974746	1.22655	1.41591	0.936469	0.803311	0.964517	1.85514	1.03664	1.1486	0.846976	0.735395	1.17498	0.95467	0.852946	0.922542	0.816732	0.796974	0.877685	0.993657	0.997336	0.68675	0.858262	1.06393	1.05762	0.939097	0.939269	0.819486	1.03944	1.03235	1.04405	0.953382	1.01172	1.07198
214	chr1	120368500	120677830	0.749309	1.05929	0.907409	0.912168	0.635667	0.662303	0.764446	1.04052	1.15069	0.717326	0.857578	0.956383	0.9885	0.947925	0.927557	0.551344	0.511208	0.713219	0.982427	0.700513	0.79196	0.767763	0.672367	0.938888	0.863518	0.993979	0.606215	0.723935	0.996262	0.532555	0.807237	0.895562	0.68939	0.824659	0.670152	0.713392	0.612802	0.713866	0.668592	0.742155	0.837247	0.876388	1.02134	0.753549	0.57608	0.865776
215	chr1	120677831	121247629	0.863059	1.19275	1.22311	0.635611	0.918464	1.03849	0.834007	0.925292	0.708723	1.27223	1.15478	0.657632	1.09859	0.863767	0.881508	0.986545	0.894326	0.883385	0.583278	1.33734	1.02705	0.890728	0.746921	1.03	1.20285	1.01247	0.957241	1.27735	0.939077	0.887623	0.818681	0.999088	0.970085	0.651527	0.670292	1.04951	1.13829	1.04582	1.06422	1.06091	0.96135	0.934741	0.835896	1.09781	1.13112	0.690484
216	chr1	121247630	121484735	2.48246	2.63163	1.69784	2.15029	2.45734	1.96245	2.08683	2.32373	1.87783	1.54126	2.97936	1.97678	2.71663	1.9618	2.09631	1.94255	2.33407	2.11572	1.41112	2.70635	1.89967	2.2148	2.04944	1.54917	2.53116	2.02425	2.33086	2.38066	1.71148	2.3087	2.39616	1.86429	2.30136	1.79525	1.9801	2.61381	1.98902	1.97481	2.21709	1.84317	1.86208	1.48847	2.54706	2.10503	2.03331	1.75513
217	chr1	121484736	142551914	1.21531	1.4977	1.81049	1.44868	1.32779	1.32873	1.17812	1.36733	1.41738	1.18627	1.46845	1.12854	1.9975	1.02793	0.96126	1.3091	1.68027	0.971251	1.29244	1.59238	0.936354	1.46698	1.54255	2.97252	0.98425	1.86652	1.91022	1.28397	1.04229	1.81734	1.37648	1.23166	1.57934	2.11468	1.36555	1.98713	1.39095	1.35292	1.82012	1.34708	0.866157	1.40609	1.89859	1.36573	1.28957	2.07646
218	chr1	142551915	142803208	1.0747	1.24074	1.18827	1.00882	0.835209	1.21515	0.832068	1.18185	1.07344	1.34686	1.27485	1.39373	0.978476	1.32509	1.37261	0.933828	1.72866	0.863959	1.44246	1.14414	1.35214	1.04523	1.0204	1.40988	0.922786	1.12508	1.20918	1.15922	1.28539	0.983579	1.36202	0.993894	1.12717	1.14185	1.40967	1.28943	1.16241	1.51797	1.09562	1.23377	1.23832	1.25997	1.22646	1.23766	1.24556	1.13283
219	chr1	142803209	142955990	1.08118	1.5203	1.09595	1.27925	1.05097	1.03211	1.03644	1.21289	0.982984	1.32698	1.15594	1.13282	1.13306	1.23102	1.14604	0.986097	1.11787	0.935931	1.30098	1.06404	1.09626	0.903157	1.46837	1.09722	0.994786	1.06709	1.46127	1.50339	1.07064	1.07738	1.04774	1.27018	1.03479	1.23607	1.25972	1.08545	1.09168	1.28474	1.2918	0.894378	0.887001	0.969744	1.42453	1.00409	0.906463	1.25777
220	chr1	142955991	143394308	1.6894	1.25944	1.58041	1.40297	1.46918	1.21396	1.04421	1.2831	0.946572	1.51537	1.16201	1.02009	0.993362	0.950319	1.07526	1.04305	1.22693	1.16464	1.22629	1.49638	1.22995	1.29366	1.1157	1.27879	1.08116	1.09203	1.24598	1.1038	1.0415	0.977081	1.09416	1.52183	1.07043	1.36695	0.956586	1.10015	1.055	1.21112	1.22932	0.940764	1.05587	1.16655	1.2149	1.1792	0.643704	1.03192
221	chr1	143394309	143919182	1.13786	1.15288	1.67091	1.08482	1.28472	1.13607	1.09222	1.41624	1.45875	1.1154	1.61721	0.999611	0.826433	1.11271	1.1449	1.05973	0.976837	1.38442	1.34597	1.20931	1.20824	1.1103	1.03949	0.952495	1.45252	1.17112	1.42217	1.14221	1.0859	1.18652	1.11131	1.07642	1.31877	1.11074	0.827093	1.18458	1.19249	1.55257	1.15741	1.1338	1.31382	1.15473	0.870427	1.05101	0.983633	1.23914
222	chr1	143919183	144381013	0.870318	0.782539	1.05913	0.941526	0.957575	0.885787	0.64941	0.995457	0.592953	1.37838	0.495007	0.879008	0.719647	0.692648	0.524671	0.706768	1.18967	0.708598	1.04019	0.827543	0.754874	0.570966	0.846483	0.953036	1.02022	0.949207	1.48423	0.615598	0.710703	0.791985	0.744934	0.672748	0.97268	0.934161	0.827221	0.70174	0.894458	1.07036	0.817007	0.86385	0.719842	0.592074	0.466123	1.11497	0.753594	0.734795
223	chr1	144381014	144891764	0.916906	0.885785	0.625546	1.21505	0.795143	0.77507	0.79696	0.687681	0.795353	1.31351	0.956868	0.869971	1.11473	0.979308	0.429699	0.703335	0.512361	0.940175	1.13932	0.643684	0.832397	0.847626	1.2068	0.834734	1.12834	0.965491	1.25047	0.828817	1.01817	0.444614	1.032	0.820746	0.655989	1.06376	1.15755	0.751167	1.0485	0.856849	0.805965	0.650684	0.655769	1.24102	0.977444	0.948577	0.818862	0.847908
224	chr1	144891765	145075864	0.621663	1.11616	0.652305	0.766189	0.694977	0.891975	0.732507	0.82947	0.849611	0.558625	0.902106	1.07054	1.16262	0.812383	0.930283	1.00122	0.646045	0.787931	1.02903	1.00831	0.870393	0.792266	0.914317	0.877225	0.864673	0.611557	0.891812	0.690827	0.816939	0.649037	0.756009	0.905833	0.624014	0.964424	0.913599	0.734451	0.860745	0.694774	1.01649	0.848709	0.778987	0.847415	0.813292	0.95244	0.914433	0.798496
225	chr1	145075865	145270683	0.893065	0.896885	1.76368	0.591256	0.810662	0.740063	1.00797	1.34571	0.782506	0.858556	0.796003	0.735063	1.06456	1.01403	1.20546	0.995046	0.778148	0.998456	0.848612	0.900821	0.900857	0.79182	0.593027	0.9273	1.05302	0.858208	1.01574	0.592591	0.927204	0.764361	0.63273	1.19327	0.908217	0.638333	1.05616	1.47266	1.04741	0.684525	0.755942	0.896323	1.04075	0.96336	1.0158	0.763715	0.624603	0.813958
226	chr1	145270684	145701590	1.01738	1.26213	0.672088	1.03178	1.10959	0.72289	0.904672	1.27153	0.999781	0.959306	1.22864	0.719037	0.630133	0.637908	1.06067	1.29232	0.621667	0.880224	0.760846	0.853768	0.903287	0.738732	1.05765	0.73808	0.831545	1.09299	1.04881	1.21801	0.769254	0.807366	0.805097	1.11109	0.885552	0.811354	0.983372	0.835316	0.723117	1.00896	1.30917	1.31341	1.10854	0.947305	1.24521	0.6538	1.09391	1.04929
227	chr1	145701591	146228446	1.06277	1.55001	1.25859	0.951285	1.24621	1.05832	1.00766	1.26996	1.22243	1.38582	1.17442	0.926456	1.25242	0.750167	1.13078	0.816995	0.863621	1.13089	0.867066	1.16744	1.03721	0.948951	1.04322	1.05049	1.32764	0.998294	1.08733	1.28239	1.49154	0.981711	0.962872	1.19319	1.27714	1.02053	0.713735	0.839723	0.669087	0.675847	0.88358	1.1719	1.01226	1.20843	1.00741	1.21011	0.876316	0.960575
228	chr1	146228447	146872036	1.23571	1.42766	0.953413	0.958695	0.801465	1.06278	1.01852	1.17524	0.835182	1.07135	1.06758	0.589517	1.07896	0.849084	1.06752	0.875654	1.1866	1.04565	0.882871	1.06201	1.05328	0.765165	1.03232	1.20326	1.41893	1.01023	1.01722	1.39409	0.922532	0.533814	1.3858	1.14582	1.04074	1.15028	1.40632	1.09617	0.74827	1.11172	1.11873	1.37366	1.04233	0.950764	1.22236	1.2777	1.02478	1.00277
229	chr1	146872037	147416456	0.80379	1.2157	0.994657	1.03899	1.07585	1.25421	1.02884	1.4513	1.34197	0.885056	0.825313	1.11103	1.07293	0.721042	1.14615	1.11369	0.808568	1.18051	1.22836	1.08946	1.16292	1.19537	0.699597	1.3238	0.979039	1.11179	0.991904	1.35099	0.875381	1.32252	1.00853	1.12224	0.719274	0.839049	1.14206	0.750269	1.4649	0.965095	1.14989	1.27235	1.12274	1.36095	0.816964	1.40065	0.838212	0.813361
230	chr1	147416457	147894833	1.08221	1.06382	1.08436	0.887898	1.50246	1.12897	1.16161	1.43268	0.790515	1.25058	1.29756	0.986667	1.27509	0.944082	1.36999	0.775361	1.08774	0.887566	1.0265	1.31338	1.19124	0.969429	1.01135	0.839834	1.29037	1.01483	0.93094	1.23838	1.23136	1.22621	0.962513	1.44713	1.37403	1.43288	1.01871	1.11555	0.703835	0.56342	0.994044	1.04567	0.822468	1.10126	0.747603	1.26065	1.02776	0.985341
231	chr1	147894834	148584795	1.2105	0.709664	0.928521	1.04297	0.79186	0.991121	0.94968	0.924005	0.73831	1.48842	0.856078	0.675704	1.037	1.08607	0.570534	0.92026	1.19978	0.465617	0.766744	0.862007	0.84603	0.570027	1.13997	0.995484	1.40157	0.929545	0.839271	0.761299	0.827549	0.81209	0.875958	0.874483	0.775229	0.775481	0.901808	0.827361	0.866508	1.03635	0.889135	1.29566	0.759025	0.649222	0.524122	1.17098	0.588876	0.747467
232	chr1	148584796	148897381	0.93944	0.551855	0.93828	0.925131	0.766602	0.586594	1.28801	0.843001	0.864398	1.52236	1.26934	0.887571	1.28613	1.00582	0.438471	0.663456	0.696011	0.769178	0.842535	1.11725	0.87733	1.07378	0.763022	0.978651	1.23435	1.01706	1.06082	1.09908	0.816648	1.15655	0.824757	0.764025	0.629203	1.28248	0.955481	0.796369	0.89081	0.966543	1.20563	1.06597	0.769327	1.07435	1.07119	1.18031	0.930726	0.769291
233	chr1	148897382	149285620	1.07408	0.809525	0.599729	1.2536	1.27425	0.775826	0.65295	0.70101	1.01639	1.36017	0.770342	1.16941	1.13232	1.20119	1.22781	1.14867	1.07139	0.910687	0.58679	0.946774	1.00985	0.937475	0.775279	1.57574	0.957551	0.990121	0.946204	0.754738	0.940287	0.839407	0.979244	0.744895	0.738404	0.830635	0.65623	1.0669	0.996855	1.11171	0.900953	1.06548	1.07127	0.917695	1.06224	0.711147	0.84188	0.955783
234	chr1	149285621	149695848	0.715681	1.08482	1.05435	0.737427	0.933002	0.972759	0.623937	0.921322	0.688064	1.1861	0.988864	0.732149	0.985338	0.984049	1.00017	0.620902	0.767885	0.804168	0.949592	1.33876	1.09714	0.982509	0.994415	1.20586	1.05491	0.907895	1.5353	1.10945	0.848103	0.846368	1.13956	0.941673	0.819841	0.945709	0.576353	0.655663	1.16402	1.03995	0.68606	0.890886	1.22687	0.738924	1.08346	0.918805	0.839268	0.878381
235	chr1	149695849	150167229	0.993433	0.632742	1.35389	0.951263	0.805605	0.928561	0.58426	1.1401	1.39759	1.32836	1.20864	0.869293	0.711508	1.05743	1.22768	0.691252	0.907535	0.895228	1.24395	0.981658	1.14178	1.11486	1.21262	0.689396	1.49224	1.00749	1.29808	0.753792	0.781775	0.377283	0.987395	1.47822	1.2011	1.29163	0.702887	0.763672	1.17238	1.19305	0.889276	0.608989	1.15596	1.1062	1.00512	0.925834	0.86321	0.898635
236	chr1	150167230	150733233	1.08411	1.16975	1.15738	1.11359	1.05767	0.854822	1.0126	1.13957	0.814507	0.852861	1.10871	0.907951	0.851208	1.26992	0.804144	1.29101	0.804855	0.881979	1.05622	1.44353	0.77154	1.27762	1.16738	1.29085	0.89346	0.934376	1.10903	0.627644	1.08197	1.21574	0.8607	0.892673	1.05975	1.41916	0.812616	1.39947	0.752878	0.973555	0.841315	1.01345	0.910565	0.856882	1.26774	1.41201	0.967455	1.00053
237	chr1	150733234	151288955	1.17163	1.35414	1.30417	1.06985	1.2766	0.983091	0.743099	0.857053	0.83813	0.915266	1.11052	1.49677	1.36663	1.23176	1.22512	1.13945	0.931264	0.664954	1.15924	1.23062	1.0667	0.798896	1.22808	1.21052	1.30296	0.971885	0.897896	1.20668	0.901415	0.821858	0.91541	1.98743	1.03669	0.988834	1.19883	0.657354	0.88647	0.798727	1.27609	0.867921	0.985531	0.813461	0.923767	1.22836	1.03504	0.906136
238	chr1	151288956	151831754	1.10622	0.943559	1.2483	0.938102	1.01991	1.10727	1.0906	0.963603	0.765618	1.2566	1.73957	0.898536	1.03669	0.85412	1.40587	0.814408	0.816462	0.897424	0.850975	1.11275	1.22744	1.01916	0.986225	0.69825	0.999086	0.963842	0.884365	0.676157	1.26174	0.962042	0.984983	1.16039	1.33839	0.971517	1.34256	0.755636	1.29325	1.51752	1.05964	0.725033	0.880437	0.599303	1.19899	1.04723	0.93913	1.02243
239	chr1	151831755	152420834	1.1842	1.09356	0.812654	1.05216	1.2136	1.47303	1.03348	0.95859	0.777861	1.18406	1.48406	1.18637	1.26937	0.943208	0.810188	1.09204	0.851687	0.537771	1.0103	1.72015	1.04577	0.982871	0.958696	1.29535	0.867375	1.05461	0.943233	0.883965	1.0655	1.50634	1.00336	1.21082	0.820516	1.16456	0.863937	1.35706	0.924815	1.04156	1.01113	1.05284	0.847456	1.24226	1.27134	1.09141	1.17378	1.18521
240	chr1	152420835	153003251	0.893413	0.685506	1.09789	0.740068	1.00377	0.975098	0.928002	1.22647	1.00572	1.31478	0.890602	0.911641	0.759871	1.11134	0.762713	0.796376	1.44692	0.74028	1.37741	1.21019	1.05527	1.20497	1.3051	1.14008	1.23838	0.979419	0.944438	0.926773	0.769643	0.884301	1.06941	0.840873	0.820766	1.51984	1.07965	0.832201	1.4019	1.25593	0.84413	0.863866	1.28581	0.887555	1.33419	1.09203	1.13143	0.877769
241	chr1	153003252	153558846	1.01811	0.845728	0.823171	0.915363	0.811318	0.924317	0.648072	1.01644	0.693345	1.34967	1.13525	1.40895	1.24368	1.32356	0.541383	1.01822	0.783461	0.664585	1.1284	1.04759	1.24395	0.969188	1.48272	1.31304	0.845487	1.04203	1.39528	1.25073	1.00922	1.30206	1.32793	0.857709	1.37771	1.19179	0.754075	0.611589	1.39827	1.41082	1.24743	1.09586	1.28804	0.94986	1.17063	0.931536	0.967847	1.12218
242	chr1	153558847	154128572	0.84643	0.982643	1.00858	0.833796	1.34552	1.05928	1.42557	1.76581	1.49294	1.41942	0.741574	1.06508	1.2251	1.18627	1.54739	0.81833	1.36236	0.921972	1.12232	1.44208	0.857192	0.972317	0.95974	1.46761	0.967304	0.898296	1.27173	1.50877	1.05701	1.04492	1.05378	0.639631	0.993472	1.15618	1.25823	0.704686	1.0784	1.08707	0.697584	1.53051	1.24972	1.21391	1.02517	0.882849	1.0812	0.838105
243	chr1	154128573	154672094	0.976549	1.09677	1.12433	0.987742	0.87547	0.649872	1.26563	1.23091	1.04318	1.20483	1.16312	0.888489	0.711953	0.774856	1.17473	0.898938	0.952387	1.15857	1.23483	0.850007	0.939306	0.774302	0.838944	1.12491	0.968671	0.835875	0.869021	0.893982	0.909961	0.684966	0.852875	1.30889	1.1082	1.32629	0.935675	0.838178	1.18511	1.49326	1.05376	0.786591	1.02037	0.642495	0.818632	0.785904	0.824197	1.08729
244	chr1	154672095	155179058	0.920532	1.41329	1.37286	1.10512	0.932482	1.04634	1.34553	0.780336	1.05055	0.81759	1.22723	0.768684	0.621619	0.698104	1.58522	1.13708	1.65978	1.40939	0.831594	0.558624	1.00553	0.804776	1.17713	0.62748	0.915208	1.09608	1.16137	0.655011	0.83846	1.24139	0.959727	1.08219	0.874353	1.26857	0.827129	0.798703	1.22689	0.956676	0.845201	0.750511	1.27136	0.822111	0.749392	1.0029	1.09447	1.07372
245	chr1	155179059	155732175	1.1591	1.16573	0.761221	1.22174	1.25363	1.13141	1.17738	1.28046	0.971841	1.24792	1.00984	0.775914	0.933963	1.01652	0.90994	1.12902	0.804046	0.629858	1.1995	0.7751	0.939449	1.27324	0.835858	1.27267	1.15319	0.891487	0.739011	1.1063	0.816187	0.922534	0.942673	1.3802	1.00197	0.991119	1.75293	0.746055	0.960356	1.03338	1.12117	1.30115	0.681495	1.2053	1.14554	0.645597	1.15227	1.09032
246	chr1	155732176	156290015	1.16973	1.05288	0.745391	0.819898	1.08339	0.932226	1.15155	1.03043	0.829081	1.13269	1.1851	1.51505	1.56719	1.11402	1.28841	0.948855	1.25542	0.777302	0.640474	0.774947	0.768273	0.802804	0.834912	1.08945	1.32367	1.16966	1.02393	0.880858	1.07599	0.513852	1.0274	0.639326	1.40377	1.27362	1.1306	0.916623	1.2883	1.18043	1.0684	1.04021	0.936648	0.797199	0.964979	0.918163	1.13995	0.985266
247	chr1	156290016	156834759	0.81337	0.663091	1.35856	1.43925	1.11704	0.851499	1.07844	1.18287	0.759699	1.41335	0.971889	0.786703	1.09522	0.984861	1.8014	0.755099	1.09483	0.80374	0.727186	0.825052	1.22604	1.05867	1.02592	0.900309	1.1327	1.14696	0.919979	1.07683	0.873734	1.03211	1.05748	0.841766	0.867408	0.977472	0.628214	0.830507	1.53906	1.59864	1.16304	1.13582	1.18234	1.11469	1.1502	0.771811	0.911313	1.18257
248	chr1	156834760	157371633	1.07995	1.57179	1.24244	0.845241	0.907339	0.760723	1.01314	0.874673	0.94065	1.00648	0.709043	1.25188	0.842128	1.12981	1.32145	1.02938	0.8047	1.29402	1.04214	0.938844	0.894496	0.853541	0.827567	1.07988	0.843595	1.0456	0.876488	0.976791	0.749476	0.771052	1.09995	1.2546	1.02093	0.526454	0.908024	0.424003	1.12167	0.940254	1.04272	1.05983	1.00436	0.99107	0.990263	0.993682	1.31772	0.967952
249	chr1	157371634	157952229	1.23482	0.890391	0.971947	0.732689	1.04975	0.908906	0.83536	1.01742	0.763498	1.06792	1.4086	0.989647	0.787029	0.841902	1.45651	0.937539	1.32054	1.13066	0.87724	0.974324	1.10786	1.29365	0.892587	1.02127	1.15063	1.08722	1.09386	1.32757	0.742953	0.485559	1.13834	1.36679	1.15934	1.82142	1.22047	1.66621	1.24092	1.56554	1.12171	1.01543	0.860859	0.713664	1.04282	1.00972	0.76824	0.741353
250	chr1	157952230	158546027	0.983323	0.843438	1.26123	1.44412	1.0463	1.19286	0.83529	1.1357	1.30037	1.67189	1.00249	0.749526	1.8048	1.21983	1.03422	1.05704	1.28659	1.35524	0.814727	1.56766	1.12519	1.10966	0.967183	1.33452	0.934059	0.939387	1.06807	1.41577	1.43047	0.969956	1.09276	1.2952	0.919516	0.933512	1.90681	1.15517	1.0059	1.17341	1.02894	1.25366	1.04327	0.776054	1.31456	0.709367	1.17216	1.13226
251	chr1	158546028	159163913	0.964796	1.19826	1.17693	0.978166	1.03381	0.879938	1.3291	1.13827	1.05246	1.08062	0.984614	1.40829	1.46447	1.15157	1.19113	1.15635	1.15026	0.975903	0.90474	0.879086	1.19786	1.26832	0.986114	1.12677	1.23316	1.27902	0.968173	1.59323	1.09975	1.24009	1.16681	0.863932	1.2006	1.45556	0.956926	1.30558	1.19975	0.677707	0.873283	1.11953	1.33029	1.13459	1.21987	0.684867	1.09403	1.16675
252	chr1	159163914	159772952	1.15144	1.1544	1.42125	1.2926	1.35926	0.999849	1.54807	1.16517	0.936366	0.735009	1.13064	1.07217	1.51332	0.99059	1.50764	1.41374	0.710836	0.741794	1.13195	0.819911	0.959749	0.686674	1.04483	0.857787	1.09217	1.12178	1.55049	1.16811	1.05688	0.783199	1.10566	1.35283	0.686021	1.3605	1.32125	1.23636	1.13049	1.66705	0.951988	1.25839	0.919156	1.17027	1.39114	0.909021	0.997574	1.05197
253	chr1	159772953	160280508	0.764745	1.46011	1.01436	0.957786	1.32904	0.882476	0.948889	1.62278	0.949907	1.02634	0.933699	0.976576	1.34781	1.13243	0.833321	1.13434	0.787329	0.952917	1.16798	1.09754	0.860184	1.08989	0.979246	1.40986	1.14236	1.0338	1.13822	0.994329	1.13178	0.793368	1.23222	0.914921	0.961412	1.09594	1.15467	1.24516	0.859318	0.883593	1.34597	0.707896	0.870775	0.87366	1.17314	1.14629	1.19487	0.795789
254	chr1	160280509	160833078	1.19352	1.22296	0.870608	1.13223	1.11185	1.03437	0.641549	1.46896	0.591204	1.13993	0.838305	1.3834	0.778388	1.13369	0.948634	0.855024	1.59972	0.989002	0.902647	1.07112	1.0888	0.781878	0.881357	1.03062	1.07801	1.08595	0.787999	1.09041	0.875258	1.01863	0.862198	0.711547	0.859771	1.33621	0.880227	1.25029	1.08404	1.60493	0.989066	0.877032	1.37646	1.29093	0.794071	0.970198	1.02195	0.846388
255	chr1	160833079	161414670	1.34837	1.10002	0.629254	1.01856	0.985076	1.2038	0.877236	1.06726	0.596121	1.13552	0.911571	0.922707	0.990681	1.05137	1.17614	0.959062	1.10017	0.991963	0.601405	0.744277	0.989677	0.876906	1.12082	1.03053	1.24127	1.0726	1.11325	1.0369	0.868446	0.539582	0.902205	0.770543	1.17631	1.27382	1.10236	0.837005	1.11892	1.01361	1.20365	0.983642	1.15235	1.10523	1.29562	0.929824	0.955092	1.03902
256	chr1	161414671	161885696	0.834983	1.12582	1.20033	0.784994	0.924457	0.921961	0.979602	1.01912	0.774882	1.07253	1.14349	0.903811	1.00187	0.904186	0.696904	1.00253	0.738906	0.892418	0.964834	1.07487	1.14485	1.2069	0.767009	1.18437	1.01918	0.839646	0.567576	0.873402	0.672068	0.7424	1.13539	0.995736	1.16241	0.805511	0.614345	0.847357	0.903909	1.19756	0.925814	0.931316	1.12318	1.4683	1.0088	0.926971	0.919325	0.859212
257	chr1	161885697	162431275	0.755579	1.42835	1.10529	0.822215	1.10548	1.10202	1.18555	0.850385	0.833377	1.23733	1.13265	0.975756	1.53263	0.977835	1.1705	0.944097	1.12665	0.706543	1.18215	1.1342	1.12248	1.15146	0.848322	0.553579	1.20761	0.949921	1.16974	1.2771	1.28772	1.12991	1.03894	1.09918	1.19599	1.15536	0.903155	0.884422	0.968117	0.911512	0.938351	0.954985	0.81612	1.00467	0.922927	0.621972	1.07882	0.961362
258	chr1	162431276	163004459	1.04254	1.52511	0.736178	0.738834	0.903323	0.959382	1.01224	1.07063	0.763583	0.757819	0.803805	0.922142	1.27197	1.15651	1.44456	0.972737	1.11939	0.721311	0.755478	1.16476	0.949165	1.17648	1.2583	1.48357	0.772364	0.88329	1.14673	0.73446	0.855412	0.511998	0.967674	1.50082	0.873283	0.660166	0.770494	0.563989	0.892499	1.41391	0.765632	0.900203	0.654816	1.19771	1.34802	1.01703	1.0003	0.916241
259	chr1	163004460	163588000	0.912973	0.743378	1.04862	1.07896	0.927081	0.953835	1.64259	1.13832	0.976963	0.933864	0.650599	0.848083	1.24683	0.971018	1.1917	0.964867	0.857262	0.824197	1.03478	0.32869	1.02538	1.0832	1.30959	1.31644	0.86188	0.973127	0.969541	0.815562	0.998008	1.22182	0.748758	1.04854	0.980664	0.867679	0.702689	0.93712	0.936647	1.11469	0.882789	0.958769	0.934482	1.0821	0.984418	0.996648	1.13232	0.916308
260	chr1	163588001	164196895	1.17704	0.851047	1.38405	1.06768	1.22001	1.39974	0.885155	1.21621	0.891611	0.967492	0.909975	1.07365	0.999837	1.00977	1.1149	0.772016	0.97888	1.09709	1.22142	1.0437	1.12364	1.35938	0.905371	0.684589	1.15934	1.03719	0.927942	0.91915	0.924066	1.13217	0.985406	1.08585	0.868479	1.48556	1.50578	1.43176	1.13276	0.838036	1.13085	0.73929	1.06884	1.05291	1.12106	1.27995	1.03513	0.987134
261	chr1	164196896	164775077	1.0201	1.03028	0.694405	0.852445	1.08086	1.44336	1.16572	1.02349	0.362729	0.844633	1.39118	0.953843	1.04208	0.834718	1.02929	1.18481	1.07201	0.925675	1.17546	1.6982	0.783492	0.858492	1.06618	0.666007	0.670983	1.07857	1.30988	0.946612	1.00922	0.744758	1.21289	1.16938	1.13084	1.13253	1.27871	1.00024	1.09399	1.86288	1.00705	1.11818	0.970324	0.992177	0.944347	1.07146	0.890732	1.02945
262	chr1	164775078	165315421	1.166	1.55353	1.13414	0.958442	1.18527	1.14632	0.98467	0.848855	1.15441	0.923962	1.08836	0.768825	0.815252	0.962716	0.711014	1.09605	0.730762	0.895987	1.16437	0.671123	1.18789	0.855763	0.870668	1.37184	1.12299	0.967113	1.55859	0.84465	0.886233	1.03583	1.03573	0.84422	1.48713	1.50698	1.00677	0.997483	0.986238	1.46523	1.08365	0.99603	0.948629	1.03374	0.95469	0.894227	0.903709	1.02119
263	chr1	165315422	165875418	1.21574	0.893827	1.00577	0.748661	1.24432	1.10162	0.623594	1.23692	1.6407	0.957203	1.24441	0.95615	0.922478	1.17824	1.12974	1.02079	0.950399	0.665124	1.26968	1.0698	1.16022	0.816267	1.19586	1.40345	1.29668	0.993108	1.0861	1.01845	1.00819	0.980169	1.03332	0.843972	0.669426	1.41845	0.711644	0.795404	1.33991	0.539083	1.10162	0.817893	0.696936	1.29679	1.00203	1.3403	1.22921	0.8613
264	chr1	165875419	166483608	1.50023	1.61138	1.61813	0.932993	0.769188	0.925535	1.11762	1.23018	1.47234	0.924458	1.94355	1.37753	1.32378	1.1291	0.904203	1.12595	1.02607	1.26848	1.37936	1.24412	1.41284	1.33054	1.44871	0.961453	0.808249	1.17668	1.12324	0.891955	1.06453	1.12105	1.17611	1.04246	0.969891	0.951968	1.08156	1.09079	0.866037	1.59692	1.31853	1.29587	1.04098	0.885956	1.08124	1.13037	0.882327	0.999778
265	chr1	166483609	167078826	1.10996	1.24341	1.54244	0.680511	1.54972	0.919029	1.03942	0.930518	1.04873	1.04838	0.976061	1.07544	1.06188	0.83182	0.37524	1.16078	0.810932	1.00449	0.752644	0.943522	0.965296	0.980802	1.21476	1.14863	1.31888	1.09404	1.21854	0.98352	0.839035	0.647881	1.21278	0.807695	0.972842	0.940052	1.33646	1.04059	1.46158	1.36909	1.25444	1.2924	0.754151	1.39943	0.977866	1.03736	1.0543	0.830478
266	chr1	167078827	167647336	0.907075	0.658107	1.04837	1.15249	1.42974	1.03511	0.902405	1.07385	0.563591	1.4519	1.14205	1.25507	1.73253	1.07157	1.12994	1.02099	1.46851	0.997853	0.990922	0.648507	0.949193	0.882703	1.11978	1.13798	0.935187	1.29965	1.08689	1.10625	1.02808	1.2038	1.202	0.842926	0.929881	1.15318	1.01291	1.50246	1.09555	1.12987	0.759817	0.654159	0.727993	0.94318	1.12692	1.03731	0.95919	1.11761
267	chr1	167647337	168224832	0.788932	0.356451	1.19939	0.988427	0.826018	1.21625	1.12198	0.82293	0.553231	1.46888	0.907708	0.863433	1.49198	0.9961	1.25578	1.16894	1.1465	1.21008	0.820239	1.31283	0.975106	0.833789	0.775192	0.63143	1.00707	0.845934	1.22051	0.973845	0.88328	0.843495	1.15351	0.934374	0.886237	1.55494	0.706119	1.35244	0.716993	1.48847	0.944511	0.899209	0.879443	1.27957	0.671906	0.853345	0.671354	0.871485
268	chr1	168224833	168776108	1.12027	0.631411	0.634658	1.10309	0.876014	1.0812	0.974959	1.16985	0.859444	1.05858	1.26979	0.960846	1.32952	1.35166	1.68723	0.957365	1.01975	0.95677	1.00939	1.55707	1.03858	1.0865	1.04031	1.00835	0.989815	0.90773	0.867525	0.722146	1.18061	1.06513	1.12938	0.863931	0.874294	0.885964	0.639581	1.40089	1.23347	1.45267	1.52506	1.15839	0.930588	1.11097	1.18276	1.04989	1.30945	0.855727
269	chr1	168776109	169361735	1.11401	0.499862	0.997447	0.883147	0.856239	0.943044	0.840162	1.08967	1.05793	0.846373	1.01067	1.09414	1.5388	0.833366	1.14534	0.912647	1.12558	1.09916	1.18899	1.06494	1.11514	1.1742	1.0254	0.890675	0.907827	0.968509	1.14827	0.679064	0.88127	1.1113	0.956521	0.829053	1.10639	1.1266	0.812739	1.0206	1.10026	1.11612	1.14922	1.10169	0.981841	1.02851	0.983007	1.16609	0.863983	1.04885
270	chr1	169361736	169953516	1.1418	0.362917	1.03806	1.18128	0.752703	0.760876	0.80729	0.881925	0.75202	1.06446	1.32923	1.07498	1.17351	1.30155	1.19599	1.23692	1.04928	1.20224	1.16041	0.836968	0.997164	1.20648	1.22186	0.89464	0.694241	1.16668	1.08702	0.847353	0.860564	0.912436	1.07895	1.05976	0.697344	0.85635	0.888355	1.14241	0.831194	0.861483	0.8463	1.20568	1.01733	1.29599	1.32258	1.1686	0.826452	1.08628
271	chr1	169953517	170550450	0.737777	0.304038	1.22675	0.903355	1.30487	0.740646	0.942392	0.875864	0.823076	0.928262	1.92273	0.866714	0.893482	0.913763	0.685975	1.18096	0.824107	1.39022	1.2676	0.832423	1.0262	1.04891	1.18733	0.865141	0.760488	0.937933	1.04514	1.11871	0.956663	0.825598	0.775758	0.62732	1.12138	0.910556	1.20769	1.29133	1.12206	1.00841	0.951607	1.08129	0.797144	1.30325	0.636073	1.2067	1.0555	1.07583
272	chr1	170550451	171130283	0.833917	0.64983	1.41214	1.17534	1.05157	1.15473	1.08057	1.37678	1.54526	0.883328	1.28768	0.991107	1.20496	1.26055	1.91403	1.09175	1.1933	0.720293	0.898622	1.27101	0.963683	1.03959	1.32188	0.942252	1.2241	0.849849	0.924068	0.943528	0.9338	0.862529	1.16867	0.812578	0.897389	0.960531	0.937673	0.917502	1.19598	0.939844	0.808423	0.966239	0.894415	0.99935	1.26185	0.937112	1.23693	1.16615
273	chr1	171130284	171709197	0.86244	0.660982	1.6568	1.27203	1.12945	1.08008	0.764334	0.885695	1.01632	0.879577	1.38454	0.836557	1.20766	1.36893	1.06596	1.07381	1.10827	0.916324	0.73691	0.764204	1.00933	1.19741	1.08367	1.05955	0.832561	1.00638	1.2442	1.06489	1.18717	0.754405	0.997314	1.1707	1.20499	0.52013	0.916699	0.838687	0.991793	1.04435	0.637587	0.820685	0.899151	0.934949	0.804244	1.05535	1.10895	1.18342
274	chr1	171709198	172294041	0.828035	0.734671	1.24793	0.702416	1.11366	0.858908	1.14161	0.951728	0.996727	1.10837	0.951397	1.25634	1.49136	1.25052	1.17869	1.00803	0.776007	1.13197	1.29182	1.23459	1.09087	0.724303	1.23079	1.33466	0.933938	1.05259	1.4654	1.05566	1.38801	1.89903	0.886182	1.06277	0.85728	0.906729	0.681747	1.08603	1.05611	0.940689	0.841276	1.01338	1.00671	0.76157	0.952226	1.05437	1.19263	0.934235
275	chr1	172294042	172861202	1.28857	0.677633	0.966285	0.98124	1.34864	1.01426	0.989183	0.831772	1.20477	0.936323	1.01786	1.03932	1.024	0.855244	0.999165	0.881257	1.05937	0.987018	1.07373	0.797292	1.06848	1.0858	1.27142	1.68826	1.10992	1.09408	1.33794	0.703118	0.780626	1.14091	1.0136	0.693183	1.08981	1.85411	1.36196	1.22226	1.12809	0.858752	0.814658	0.632879	0.849484	0.844384	0.799023	0.845005	0.934571	1.06059
276	chr1	172861203	173429987	0.78028	0.577651	0.634875	0.804628	1.16883	0.703628	0.867632	0.710475	0.944401	1.60319	1.26169	0.877181	1.50075	1.01753	1.03322	1.08101	1.1793	0.982454	1.22111	0.793657	0.960885	1.18439	0.995675	0.831433	0.762375	1.01122	0.840556	1.49631	1.04754	0.523645	1.01426	0.671	0.837493	1.26133	0.874716	1.02237	0.84027	1.34716	0.674925	1.24159	0.894901	0.634836	0.82158	1.1236	0.747605	0.829229
277	chr1	173429988	174048820	0.821052	0.891028	0.935777	0.76618	1.00614	1.07197	1.2477	1.24773	1.18304	1.08916	1.40838	1.10441	0.996672	1.08917	0.984075	0.980433	0.897855	0.833117	0.843319	1.28944	0.869975	0.792431	1.33016	0.998057	1.14642	1.00903	1.08877	1.15724	0.686121	1.2522	1.09042	1.08568	1.09571	0.860733	1.1245	0.607692	1.23296	1.11926	1.17611	1.52172	1.09821	1.25409	1.00862	1.23346	0.99317	1.12201
278	chr1	174048821	174718058	1.16486	0.922911	0.786886	0.85839	1.55165	1.23037	0.944978	1.08016	0.774616	1.42624	0.919507	1.10146	1.1203	1.07588	1.64711	1.32215	1.36479	1.12201	0.756335	1.19773	1.23215	1.23708	1.02189	0.873705	1.30367	0.978287	0.927739	1.38526	0.886114	1.25621	0.937042	1.03373	1.20191	1.05051	0.856553	1.06179	1.30022	1.17184	0.723814	1.11812	0.921683	0.910725	0.640459	0.918525	0.883314	0.939352
279	chr1	174718059	175291788	1.43671	0.578723	0.820927	0.986781	1.19828	1.44843	1.37049	0.89521	0.972385	1.01343	1.12877	0.896393	0.742844	0.970575	1.40496	1.08679	0.783644	0.657841	0.976888	1.82893	0.830762	1.01767	1.00671	1.00661	0.91024	1.24283	0.914201	0.863454	1.00247	0.67078	1.43255	0.857818	1.55713	0.871413	1.41983	1.66417	1.31612	1.39942	1.1829	0.87878	1.16923	1.00763	0.919799	0.979495	1.19458	0.994995
280	chr1	175291789	175811133	1.11026	0.542445	1.34438	0.834126	1.00484	1.38269	1.30215	0.865386	0.792093	1.31216	0.536834	0.711521	0.805511	1.03344	1.28446	1.01467	0.700061	0.933088	1.14051	1.17265	1.08554	0.940354	0.724204	1.34572	0.969516	0.90534	1.4562	0.71535	0.952581	0.943818	1.05043	1.24685	0.90673	1.60692	0.718901	0.841524	1.36417	0.791036	1.081	1.20612	1.04438	0.50502	1.17461	0.998333	1.07318	1.35309
281	chr1	175811134	176430506	1.13577	0.722793	0.579787	1.2536	0.891894	0.841713	1.27185	1.02096	0.758593	1.09236	1.0497	1.29929	0.953492	0.997791	0.651687	0.822596	1.18167	0.756763	0.805304	1.01208	0.906088	0.744556	0.673246	1.32657	0.869912	0.932684	1.21349	1.36505	1.08524	0.802941	0.92833	1.12228	0.760823	0.632192	0.838226	1.34448	1.41025	0.994463	0.94327	1.18986	0.758523	0.844529	0.983527	1.23663	0.934609	1.02917
282	chr1	176430507	176987176	0.963179	0.683025	1.46333	1.14818	0.904879	1.17127	0.658511	0.646912	1.1997	1.50528	1.11013	1.06738	1.01458	1.13482	0.959998	1.13756	1.16705	0.831254	1.44351	0.953878	1.17853	0.920803	0.717757	1.04945	1.13787	1.05712	1.46367	0.98719	1.11497	0.892469	1.08496	1.02728	0.939478	1.22413	2.04016	1.45292	1.1321	0.995537	0.992244	1.05382	1.11411	1.14293	0.918886	1.08584	1.28729	1.0789
283	chr1	176987177	177519882	0.954737	0.443103	1.02608	0.828421	0.777971	0.864233	0.556157	0.849395	0.710807	1.07828	0.858741	1.31608	1.1361	1.0538	0.929095	0.841257	1.57398	0.952641	0.890063	1.05074	1.2364	1.01407	0.634436	1.03088	0.863809	1.06174	1.30851	1.31928	1.03601	1.10966	1.22361	1.34449	0.821015	0.783819	0.847292	1.05091	0.993031	0.868753	1.06614	1.11646	1.4889	1.0805	1.20866	0.688362	0.939893	1.11823
284	chr1	177519883	178071529	0.898221	0.668291	1.02987	0.902237	0.804672	0.91148	0.527003	0.93635	0.78776	1.04346	0.931242	0.866683	1.00347	0.993869	0.840209	1.05498	1.39797	1.31252	0.914909	0.931526	1.04762	0.827615	0.89117	1.38744	0.974652	1.05439	0.790517	1.02793	1.11982	1.07118	0.820797	0.79263	1.12565	0.780603	0.778173	0.934628	1.25659	1.61917	0.837339	0.796541	1.23221	0.978905	0.918688	0.809171	1.13084	1.1249
285	chr1	178071530	178617151	1.18266	0.402844	1.71968	0.873336	0.991352	0.784101	0.720556	0.999267	0.690057	1.20582	0.95601	1.11952	1.23997	0.909103	1.16088	1.14403	0.474653	0.433446	0.817606	0.898531	0.927169	0.854687	1.00316	0.832361	0.900823	0.877217	1.43049	0.847065	1.11754	0.721365	1.12144	1.15987	0.949915	1.19007	1.56299	1.12598	0.84334	1.27409	1.14313	0.950294	0.851468	0.992327	1.08053	0.995769	1.04196	0.758962
286	chr1	178617152	179183920	0.663078	0.62741	1.24222	1.03124	1.03421	1.29627	0.90515	0.62499	0.946589	1.02993	0.914579	1.02028	0.929948	0.737949	1.22004	1.19521	0.821408	1.2813	1.33855	0.979795	0.985977	1.07687	1.22668	0.830176	1.02344	0.829925	1.14187	1.3221	1.10868	1.63774	0.812337	1.06537	1.51664	0.931564	0.678494	0.809104	1.1193	1.15412	1.15392	1.10013	0.803002	1.20868	1.05066	1.15853	0.856174	1.22496
287	chr1	179183921	179801512	1.22451	0.844376	0.987558	1.07624	0.80651	1.21412	0.489353	0.901322	1.50313	0.62686	0.920324	1.21907	0.899247	1.05602	1.21488	1.3187	0.665033	0.852178	0.968544	1.23685	1.01066	1.16681	1.03697	0.972819	0.971705	1.11886	1.01423	1.49102	1.31528	1.23895	0.794809	0.755867	1.2463	1.17545	0.925913	1.48752	0.952617	1.02406	1.07488	1.27311	1.11903	1.07411	0.884986	1.04886	0.865363	0.870822
288	chr1	179801513	180363739	0.965879	1.4268	1.19887	0.986861	1.26163	1.04247	1.26456	1.13405	1.34481	1.30109	0.999509	1.54974	0.78095	1.05959	1.16322	1.11109	2.10404	0.818396	1.37101	0.707427	1.13306	1.14696	0.961556	0.885001	0.881776	1.01032	1.64919	0.764976	0.706897	0.846429	0.902956	0.969043	1.21334	1.10329	1.05752	0.888311	1.01747	0.920004	1.01538	0.820729	0.884514	1.06886	1.03995	0.915666	1.15093	0.949092
289	chr1	180363740	180944217	0.939727	1.03037	0.95284	0.925693	0.904701	0.918198	1.07528	1.22347	0.560023	1.15673	1.04788	0.91948	0.94243	0.947739	0.916293	1.13894	1.42575	1.52705	0.797055	1.04807	0.962425	0.801264	0.907608	1.11066	0.861542	0.78504	1.17745	0.687257	1.11572	0.807111	1.04123	1.61294	0.792967	0.890689	1.13105	1.16822	0.844191	1.14443	1.06558	0.873964	1.17702	1.2011	0.552801	0.890021	1.35191	0.903399
290	chr1	180944218	181474886	1.20848	1.68687	0.71847	0.885355	1.11053	1.26192	1.1797	0.617135	0.949285	0.789015	0.991289	0.951046	1.04252	0.791848	0.863034	0.963211	0.577035	0.522685	0.948817	0.996587	0.93144	0.84063	1.17912	1.08723	1.1401	0.988186	1.34695	0.679059	1.14589	0.715948	1.07592	1.07727	0.79721	0.382855	0.713964	1.0653	0.914	1.43891	1.11954	1.06541	1.07843	0.948398	1.08875	0.981788	1.2868	0.98246
291	chr1	181474887	182029950	1.25253	1.072	1.33521	0.868068	1.19271	1.003	0.797661	0.840522	0.842927	1.08381	0.758862	1.16986	1.15122	0.958335	0.907124	1.20152	1.36668	1.1412	1.04718	0.965888	0.929609	0.717776	0.700818	0.98967	1.31095	0.959124	0.833794	0.610757	0.798798	1.15684	0.998816	1.12906	0.721785	0.931085	0.971965	1.19315	1.01872	1.2316	1.03823	1.0575	1.1243	0.974978	1.07235	1.33668	0.776999	1.10135
292	chr1	182029951	182594508	1.01786	0.760747	1.11559	0.90272	0.926483	1.19183	0.980032	1.42526	1.14237	0.837611	0.94475	1.35832	1.33739	1.01107	1.43889	0.914152	0.830605	1.06068	0.871398	0.915481	1.04773	1.50252	1.1899	1.0346	1.17039	0.97734	1.51417	0.612198	0.774345	1.02317	1.13639	0.995268	1.27209	0.719688	0.924813	1.33613	1.0251	0.555556	1.05079	0.93074	1.1906	0.793667	1.43822	1.45816	0.837395	0.894871
293	chr1	182594509	183145444	1.05189	1.24618	1.25602	0.874019	0.979439	0.864257	0.800547	1.17404	1.30223	1.20165	1.03133	1.13956	0.787291	1.24171	1.03371	0.849834	1.71808	0.897324	0.997987	0.974081	0.968276	1.26249	0.929799	1.14539	1.46179	1.21164	0.696582	1.07082	0.762679	1.10341	0.969232	0.956505	1.20179	0.888553	0.825804	0.940051	1.24109	0.637158	1.04482	0.801506	0.768469	0.832929	0.858504	0.880869	0.768137	0.904758
294	chr1	183145445	183703833	1.07437	1.39643	1.58995	1.27451	1.02897	1.1624	0.905848	0.840642	1.1294	0.887448	1.05557	0.689624	0.865506	1.04532	1.43214	1.43593	1.36868	1.03844	0.863429	0.870998	1.12315	0.720668	0.857167	0.774629	0.974183	1.07337	0.866661	0.872879	0.920033	1.47387	0.832814	1.20047	0.876141	0.84379	1.24106	0.972715	1.31955	1.01687	1.02157	0.976798	1.21868	1.29923	1.10559	1.20758	0.819713	0.848742
295	chr1	183703834	184230504	0.985455	0.897039	1.22656	1.06437	0.997666	1.10772	1.00519	1.40873	1.11468	0.929128	1.17582	1.15638	1.12333	0.861834	1.14313	0.78765	0.821219	0.864349	0.706251	1.11272	1.01395	0.951926	0.906749	1.10956	0.953405	0.958202	0.922763	0.729723	1.05835	0.982246	1.20681	1.4043	1.10644	0.675743	1.05582	1.12146	1.13246	1.24437	1.0514	1.49078	0.680912	1.14288	1.07235	1.19437	0.886428	0.991578
296	chr1	184230505	184775642	1.20093	1.10634	1.01288	1.15933	1.06248	1.11517	0.905076	0.920121	1.192	1.03398	1.08905	1.37166	0.947168	1.14701	1.03113	0.743806	1.40798	0.842758	0.753124	0.66354	1.12888	0.977965	1.13114	1.00106	0.801138	0.92466	1.18678	0.892659	1.14337	0.916799	0.867397	0.95977	0.876415	0.759273	0.898065	1.03841	1.07282	0.894088	0.779464	0.904692	0.882652	0.903516	1.41432	1.15602	1.04779	0.769971
297	chr1	184775643	185364729	1.17372	0.577062	1.06625	1.18301	0.811206	0.935692	0.828243	1.27756	1.11464	0.927106	1.06625	0.579507	0.879658	0.805012	1.06443	1.17337	0.627417	1.07929	1.19358	1.3879	1.13115	0.936443	0.932601	0.735373	1.27448	1.07382	0.872642	1.29322	0.787994	1.43633	1.06243	0.812017	0.831666	1.19033	0.834294	0.938593	0.840871	1.12003	0.880013	1.28428	1.01113	1.02384	0.834635	0.549835	1.01866	1.02001
298	chr1	185364730	185958867	0.88166	0.774395	0.925062	0.938229	0.992892	0.689846	0.556244	0.652392	0.937844	0.868091	1.16168	0.835804	0.916868	0.967898	1.42185	0.636265	0.678618	0.844962	0.955408	0.899062	0.806965	0.743481	0.768148	0.640077	0.947492	1.22282	0.984729	0.939753	0.849791	1.09302	0.99544	0.843284	0.979003	1.21826	1.18624	0.933512	0.969924	1.44439	0.809181	0.939484	1.00437	0.825408	0.98911	1.03457	0.921226	1.21441
299	chr1	185958868	186547492	1.11353	0.501839	1.1206	0.896869	1.04013	1.08464	1.21143	0.915911	1.21989	0.997274	1.09047	1.27676	0.711643	1.10369	1.15803	0.807065	0.829039	0.949762	1.02511	0.840408	0.956888	1.07608	0.993817	1.48194	1.38998	1.06509	0.57952	1.08018	1.08106	1.01015	0.987363	1.10914	1.05301	0.940848	0.690956	0.97065	0.787514	0.788289	1.13133	1.01065	1.37807	0.895389	0.980225	0.846907	0.698461	0.762794
300	chr1	186547493	187181921	0.975516	1.32462	1.53589	1.13964	1.36538	0.938675	0.942256	0.820204	0.756914	1.0907	1.03555	1.29346	0.874284	1.08357	0.51548	1.07207	0.63012	1.12421	0.904713	0.876399	0.967321	0.914722	0.852131	1.28048	0.844593	0.937973	1.02034	1.00717	1.10854	0.990335	0.881443	1.05975	0.69494	1.02062	0.966033	0.552636	0.933563	0.976121	0.837303	1.17128	1.40222	1.13007	0.866898	1.02587	1.05505	1.2092
301	chr1	187181922	187838777	0.991798	1.11424	0.735954	1.32143	0.860883	0.976023	1.15864	1.57688	1.33814	0.811363	1.07423	0.93094	1.44685	1.21479	1.00918	0.82184	0.86076	1.2272	0.964114	1.4481	1.292	0.778075	1.35142	1.23632	1.32391	1.13497	1.3054	1.0301	1.12883	0.961997	0.936952	0.989779	0.977497	0.546425	1.43775	1.39821	1.06814	1.26035	0.962328	1.01286	0.797441	0.995819	1.24387	1.22566	1.13121	0.976434
302	chr1	187838778	188522302	1.06597	0.998389	0.752275	0.944131	1.09651	1.41988	0.883024	0.968641	1.02348	1.22723	1.05899	0.762538	1.10538	1.03022	1.06108	0.748436	1.01323	0.949539	1.03944	1.18579	1.03171	0.629493	0.989105	1.01188	1.33169	0.836984	0.935463	1.03902	1.18335	0.672446	0.893634	0.993576	1.14233	0.976385	1.18272	0.914298	0.780278	1.31246	1.16859	0.825785	1.11446	1.3575	0.891193	0.874537	0.890599	1.03358
303	chr1	188522303	189249333	0.813648	1.15862	1.22995	0.708505	1.38523	1.07014	1.18832	0.933463	1.5359	1.25478	1.11409	1.05151	1.13423	1.14503	0.786403	1.24718	1.32636	1.22453	1.19963	1.32032	1.09687	0.858537	1.02262	0.752053	1.01383	1.15573	0.990579	1.2626	0.943499	1.2706	1.15803	0.555523	1.12426	1.0856	1.21298	0.983789	1.22298	1.67521	0.990063	1.19331	1.00783	0.965129	1.16279	1.04939	0.890733	1.26083
304	chr1	189249334	190011952	1.28822	1.28767	0.707227	0.980366	1.11806	1.09588	1.24977	0.90896	1.28945	1.24914	0.855152	1.41348	0.734895	1.15086	1.22986	1.16071	0.912913	0.970474	1.20437	1.12851	1.04269	1.17653	0.765619	0.900096	1.02377	1.09408	1.24009	0.827241	0.964913	1.80396	1.30714	0.973378	1.02474	1.39076	1.69658	0.796565	1.44203	1.21013	0.915603	0.832099	1.05226	1.13203	1.13378	0.990137	0.931829	1.19869
305	chr1	190011953	190714328	0.947129	1.35825	1.06254	1.00224	1.26223	1.236	1.19951	1.30298	1.29685	1.06569	1.10729	1.06761	0.765201	1.03588	1.46176	1.50571	1.22936	0.703711	0.954861	1.16765	1.15394	0.870545	1.40793	1.00187	1.46551	1.16559	0.689082	1.40398	1.11569	1.19055	1.50376	0.723525	1.01514	1.09184	1.30578	1.19395	1.22996	1.12281	1.16646	0.846675	1.00317	1.0076	1.57336	1.03714	1.18311	1.00476
306	chr1	190714329	191409719	0.832565	1.31912	1.2628	0.630225	1.03907	1.2847	1.12	0.682771	1.19523	0.864125	0.890649	0.893506	1.19261	0.897271	1.25906	0.886701	0.937429	0.581256	1.06665	0.700433	1.05644	1.23081	1.0563	1.08852	0.956573	0.977776	1.04572	1.26374	1.01244	1.6076	1.08734	0.906958	1.03007	0.760545	1.18257	1.29865	0.807093	0.949932	1.05262	0.987289	0.821693	1.01628	0.893823	0.7967	0.987735	0.83397
307	chr1	191409720	192076189	0.881779	1.06768	1.02851	0.90664	1.24474	1.11784	0.921809	1.44814	0.675799	1.06592	0.871573	0.684404	0.641144	1.1805	0.855662	1.35738	0.803351	0.929837	1.01339	1.05682	1.02715	1.20129	0.358022	0.83507	0.772384	1.2964	0.721164	0.727396	0.783361	0.891963	0.867491	0.846548	1.15008	1.25032	1.39126	0.673765	0.949115	0.777742	1.11522	1.07642	0.859195	1.21567	0.951022	0.993071	1.17243	1.08965
308	chr1	192076190	192699909	1.43077	1.23356	1.19355	0.988479	1.1704	1.1003	1.47769	0.990596	0.596986	1.25804	1.09607	0.99977	0.791826	0.934823	1.24504	1.13412	1.1531	1.42825	1.29	0.758452	1.17968	1.05218	0.88825	1.21937	1.30939	0.973663	1.1187	1.47671	1.13456	1.09882	1.20317	1.04617	0.90469	1.29628	0.874618	1.11496	1.15636	1.05852	0.966875	0.800255	0.698522	1.11562	0.915591	1.1561	0.821132	1.00766
309	chr1	192699910	193302245	1.04463	1.42728	1.39534	0.919535	1.33043	1.14916	0.881026	1.39331	1.11301	1.04935	1.58627	1.0203	0.977033	0.704258	1.11185	1.11283	1.00135	1.2326	1.3782	0.910497	1.05511	0.919474	1.33592	0.941273	0.932167	1.03533	1.16789	0.914289	0.676695	1.27139	0.951049	0.884893	1.03853	1.26434	1.50009	1.19183	1.14013	1.44892	0.682069	1.34537	1.39251	0.957412	1.15378	1.17803	0.970257	1.03949
310	chr1	193302246	193902297	1.27686	0.958796	1.04782	0.952503	0.921038	1.40089	1.04386	1.17166	0.799062	0.934908	1.15511	1.26005	0.977876	1.16253	0.987452	1.06683	1.06425	0.790842	1.13965	0.619924	1.13651	0.978616	1.06503	1.0524	0.965857	1.01768	1.14703	0.734921	1.28946	0.797918	0.954803	0.689805	1.15188	1.17707	0.961764	0.863288	1.15435	1.00962	1.05427	1.16542	1.46257	0.984059	0.923324	0.714734	1.11576	1.19106
311	chr1	193902298	194588139	1.09303	1.17099	0.928699	1.02911	1.08074	1.01868	1.12843	1.09828	0.688656	1.32128	0.606893	0.621194	1.02642	0.894309	1.00755	0.857251	1.04811	0.907884	0.928303	1.05178	1.09659	1.28893	0.941662	1.59789	1.14776	1.01825	1.55336	0.918595	0.78419	1.21653	1.13513	1.26398	0.789252	1.00052	1.08164	1.02657	1.12747	1.08887	1.095	0.750277	1.14365	0.847637	1.15031	1.11211	1.11916	0.867424
312	chr1	194588140	195294570	1.01674	1.08945	0.837542	1.08972	1.25392	1.25515	1.28091	1.13134	0.90389	1.02508	0.989924	0.939751	0.935801	0.999463	1.19358	1.15914	1.35624	1.32935	1.23342	1.18035	1.04334	0.747166	1.67013	1.02554	0.615987	1.00134	1.13005	1.0197	0.983621	1.13004	0.940809	1.24257	1.01114	0.918538	0.666295	1.06805	0.998924	1.03706	1.11165	1.15844	1.07526	1.04923	1.05961	1.20256	1.20424	1.02684
313	chr1	195294571	195971410	0.799522	0.794298	1.40529	0.807337	1.18977	0.98694	0.953849	1.1379	1.10277	0.979356	1.12053	1.02637	1.36084	0.990697	0.937606	1.33038	1.27235	0.801743	0.639669	0.75686	1.28041	1.25849	1.17838	0.911324	1.12142	1.04218	1.27072	1.87153	1.0079	1.37804	1.08246	1.19672	0.68128	2.0827	1.06004	1.34339	1.10993	1.2438	1.29001	1.32868	0.93487	0.604795	0.959805	1.16729	1.0607	0.876213
314	chr1	195971411	196608520	1.20161	0.983961	1.09738	0.82411	0.802473	0.882637	1.12936	0.806441	0.798874	1.04066	0.762122	0.947873	1.17227	1.17972	0.890241	1.13511	1.21375	0.935034	0.880602	1.49442	0.782821	1.57313	1.06745	0.863257	0.938759	0.993227	0.557206	1.47671	1.17104	0.815737	1.15636	0.788254	1.07029	1.38539	1.38917	0.996243	1.14652	1.21044	0.990933	1.2822	1.1611	0.983173	1.07233	0.974537	0.995762	1.44897
315	chr1	196608521	197238353	0.970562	1.21272	0.788426	0.985255	0.766949	1.09993	0.918321	0.87529	1.05753	0.977059	0.789156	0.714313	0.816442	1.26931	1.06265	0.852154	1.40272	1.15469	0.832187	1.17144	0.986295	1.30093	1.45621	0.732643	0.998688	1.04902	0.987091	1.19592	1.14932	0.846266	0.994021	1.16369	1.13492	1.04913	1.23618	1.70028	1.2976	1.00516	0.901076	0.821636	0.88996	1.2404	1.56794	1.05996	1.09149	1.01927
316	chr1	197238354	197896658	0.963643	1.27482	1.11561	1.02487	0.975382	1.36081	1.04056	1.12715	0.920419	1.21363	0.819909	1.11752	0.847922	1.1063	1.06847	0.948369	0.749206	1.30521	1.02311	1.36438	1.06938	1.16721	0.776235	1.1797	1.4735	0.959261	0.763818	1.07597	1.16925	1.21238	0.922943	0.980809	0.814791	1.09209	1.44214	0.582028	1.11552	1.24315	1.14304	1.00423	0.907409	0.922371	1.00832	0.962387	0.996886	0.950364
317	chr1	197896659	198484139	1.05435	1.0513	0.750471	0.85044	0.992887	0.895747	0.946796	1.00567	1.34536	1.37112	1.03887	0.637791	0.937289	0.807569	0.687929	1.47878	0.983172	1.03074	0.9902	0.7674	0.9069	1.03167	1.20742	0.870123	0.813595	1.01268	1.15935	0.931941	1.09536	1.2139	1.03563	0.987808	0.774073	1.25713	1.00657	0.757286	0.844661	1.02425	0.71669	0.836446	0.845351	1.16122	0.810259	0.621418	1.15291	0.857266
318	chr1	198484140	199063095	1.02696	0.702323	0.986871	0.741725	0.680812	0.910391	1.14543	1.47533	0.864645	1.05558	0.629741	0.965433	1.21106	0.90585	1.10183	0.982896	0.881157	0.910076	0.985377	1.42239	1.02839	0.848652	0.832661	0.938024	0.944468	1.07714	0.933241	1.2281	1.14048	1.28728	0.926261	0.816667	0.894552	0.715725	0.868613	1.01007	0.998321	1.17035	1.02098	1.0122	0.743953	0.885872	0.896909	0.961584	1.10765	1.07282
319	chr1	199063096	199678538	0.765902	1.71674	0.731291	1.19347	0.930577	1.15796	1.05575	1.02949	1.02201	0.989565	0.800912	0.948259	1.01586	1.15699	0.716563	1.0801	1.60611	0.873089	1.33043	0.846631	0.938254	1.33856	1.17023	0.774612	1.23606	1.09391	0.913059	1.21298	1.0344	1.67587	0.902648	0.901186	1.13343	1.22273	1.07306	1.17408	1.02973	1.43631	1.01817	0.963388	0.92771	0.88774	1.17559	1.12057	1.13016	0.934533
320	chr1	199678539	200252753	1.16719	1.1023	0.747274	0.893593	0.998485	1.12579	0.934785	1.09667	1.14931	1.53119	1.17099	1.09676	1.01447	0.900947	1.18547	0.815163	0.864596	1.00054	0.769844	0.923631	1.12581	0.732427	1.01802	1.34764	1.0142	0.915019	0.922676	1.24304	0.963331	0.841874	0.841137	0.956019	0.878408	1.21703	1.01319	0.74215	1.24346	1.24616	1.0386	1.31214	0.803705	1.37793	0.824176	1.06442	0.969781	0.818972
321	chr1	200252754	200829650	0.739119	0.854162	0.90991	0.644185	0.881664	1.00112	0.970499	1.02783	0.514376	1.56974	1.20836	0.978464	1.63062	1.17705	1.32594	1.1085	0.950899	1.16361	1.04409	1.49427	0.840606	1.0132	0.868937	0.89961	1.10716	1.03857	1.24095	1.58818	1.07723	1.47313	1.01858	0.753471	1.02295	0.760091	1.02047	0.705985	0.98718	1.66747	0.88853	0.771091	0.86659	0.703319	0.949714	0.998939	0.865295	0.88265
322	chr1	200829651	201330821	0.848674	0.880414	0.672195	1.02038	1.03625	1.06949	0.818001	1.25771	0.843694	0.751835	0.686938	0.692931	1.40339	1.0032	0.960972	1.2173	0.541635	0.929659	1.67725	1.33625	1.17609	0.909671	1.08444	1.1353	0.716011	1.00903	0.601896	1.23987	1.02043	0.668588	1.11306	0.72899	0.856894	0.753688	0.958551	1.11527	1.16543	1.42531	1.02403	0.895761	1.28026	0.777107	0.550898	1.15104	0.794237	1.16214
323	chr1	201330822	201843451	0.918921	1.52797	0.950364	1.18213	0.978917	1.30617	0.68372	1.2804	1.4708	1.02381	1.08618	1.10265	0.634247	0.97339	0.572779	1.21583	1.23504	0.606362	1.18961	1.32009	0.942014	0.7599	0.591027	0.725038	1.35061	0.929389	1.08458	1.24099	0.764832	1.11511	1.03523	0.979821	1.15193	1.03076	0.883165	0.872453	0.756598	1.38437	0.953499	1.02487	0.764641	0.914171	0.722765	1.13138	0.926928	1.12974
324	chr1	201843452	202398637	1.16489	1.08565	1.12947	0.485163	1.33717	1.04795	0.756483	1.02254	1.0363	0.876035	0.73301	1.34524	1.05248	0.926064	0.968178	0.789724	0.974041	0.839713	1.14774	1.43655	1.10615	1.1884	1.01959	0.85417	1.19481	1.00528	1.04657	1.18778	1.0819	0.962937	0.848145	1.20699	1.23866	0.77916	1.18175	0.92621	0.824117	1.09342	1.05322	1.07727	0.597834	1.31994	1.03631	0.981376	0.970131	0.916652
325	chr1	202398638	202930496	0.77491	0.804764	1.0038	0.902962	0.870873	1.34914	1.04215	0.880871	0.52466	1.10675	0.987497	0.827263	1.47304	1.21967	1.39896	0.820076	0.891137	0.968425	0.682614	1.03531	1.04444	1.15393	0.845602	0.868361	1.65384	0.98308	1.16007	1.16366	1.02749	1.3576	0.823109	1.09754	1.1555	1.15658	0.610438	1.10645	1.13536	1.65315	0.858014	1.00203	1.03349	1.27711	0.937079	0.929326	1.29911	0.839738
326	chr1	202930497	203442514	0.76143	0.607311	1.0643	1.14061	0.816703	0.626704	0.991814	0.879943	1.20434	0.921054	0.448501	1.08707	1.27994	1.36456	1.28479	1.10338	0.98644	0.824381	0.972921	0.90126	1.02623	0.726576	1.1655	1.24645	1.12238	0.954599	1.23249	0.380293	0.822787	1.19316	1.19709	0.733099	0.891329	0.813141	0.900114	0.865923	1.03328	0.605902	0.915269	1.21772	0.975381	0.686899	0.936174	0.887961	0.918829	1.00398
327	chr1	203442515	203995279	1.06478	0.762161	0.671895	0.988954	1.07791	1.17818	0.934664	1.24075	0.69375	0.935897	0.938313	1.06717	0.623029	0.929852	1.23168	0.976734	0.759353	0.99448	0.810331	1.40997	1.24046	1.03949	0.915806	0.890927	1.42671	0.925971	1.00761	0.353971	0.859242	0.971363	0.94292	0.943785	0.890747	0.754742	1.39485	1.30509	1.2164	0.998524	0.731126	0.77494	1.1359	1.0849	0.774535	0.945259	1.04574	0.983351
328	chr1	203995280	204509755	0.697066	0.707657	1.24227	1.48663	1.13723	1.35725	1.33111	1.02807	1.26776	0.987594	1.45317	0.826467	1.1448	1.35673	1.39539	1.03758	0.884041	0.743608	1.30724	0.814496	1.1811	1.064	1.22976	0.957768	1.06898	1.1933	1.19257	1.25929	0.784863	1.27604	1.0267	1.07265	1.08972	1.42803	1.04736	1.01271	1.31646	0.66494	1.01201	0.769581	0.96778	0.762196	1.16877	1.48415	0.879977	1.05883
329	chr1	204509756	205005865	0.909777	1.54614	0.9741	0.629859	0.897407	0.954594	0.812694	0.543565	1.20277	1.0267	1.53159	0.982035	0.837246	1.0368	0.781342	1.04267	1.08459	1.15259	0.940223	1.07446	1.04491	1.18885	1.09001	1.44305	0.715192	1.0937	0.900272	0.949215	0.911121	1.34051	0.989205	1.31782	0.847671	1.11098	0.899514	1.05707	0.764481	0.927636	0.914698	1.13248	1.14243	1.06122	1.03844	1.26949	0.853905	1.12653
330	chr1	205005866	205530310	0.991235	1.44827	1.53587	1.21294	1.06458	0.872832	1.33296	0.681599	0.740596	0.912412	1.38826	0.586435	1.17837	0.749474	1.02467	1.12378	1.28125	0.772358	0.786548	0.892987	0.88084	0.627168	0.940805	1.34663	0.817567	1.04888	1.215	1.23484	1.23987	1.06429	1.02002	1.2842	1.21639	1.24743	1.81534	0.926628	0.721016	1.05248	1.00208	0.989481	1.02952	0.974006	1.00206	1.05477	0.81573	1.06511
331	chr1	205530311	206167745	1.43381	1.00042	1.44984	0.940522	0.816173	1.00963	1.10137	1.02312	1.43265	0.965194	1.24947	0.920622	0.656599	0.954521	0.688839	0.852415	1.07171	0.892962	1.24387	0.994753	1.09083	1.11764	0.96169	1.67681	1.03413	1.15986	1.06928	1.04028	0.936888	0.92243	0.914612	0.832736	0.936839	1.14181	1.33858	1.11086	0.962816	1.08776	0.970738	1.00743	0.885965	0.689355	1.25142	1.16058	0.986705	0.905111
332	chr1	206167746	206732803	1.21752	0.418042	0.905998	0.531642	0.93826	0.868888	1.16984	0.66104	0.793064	1.06709	0.840864	0.727172	0.914399	0.939644	0.625694	1.0915	0.978965	0.790828	0.979543	1.37533	1.16085	1.21827	1.07708	1.36019	0.888426	1.02146	1.06298	0.683959	0.949369	0.532944	0.922998	1.01211	1.35649	0.863156	0.934907	0.59996	0.638454	0.90471	0.789669	0.896223	0.756579	0.715862	0.71534	1.19078	0.833227	1.03984
333	chr1	206732804	207232712	1.11572	0.989551	0.674444	0.903778	1.17365	1.17604	0.966971	0.926206	1.06164	1.21141	1.08953	0.87736	1.44055	0.821949	1.60466	1.06856	0.982532	1.39135	1.45215	1.06105	0.884308	0.842246	0.718618	0.699182	1.1246	0.938023	0.53651	0.933797	1.09357	0.777667	1.09906	1.4123	0.958284	0.707935	0.961552	0.836604	1.4412	1.13134	0.908645	0.74369	1.13914	0.843006	1.23741	0.900401	1.17576	0.87424
334	chr1	207232713	207811117	1.10488	1.02539	1.06064	1.31218	0.963913	0.941854	1.21888	0.982001	1.29463	1.14287	0.901348	0.63839	0.494449	1.19291	1.01635	1.28848	0.914648	1.00645	1.18548	0.627916	1.15647	1.02869	0.900222	1.06905	0.906782	0.887489	0.895737	0.500914	1.20705	0.77885	1.09257	1.10851	0.767183	0.638667	1.18655	1.38989	1.35533	0.918433	1.23694	0.870647	0.948855	0.733293	0.990253	0.924502	1.07523	0.983544
335	chr1	207811118	208345901	0.868153	1.35408	1.14663	0.900608	1.27336	1.43674	1.01338	0.967337	1.01137	1.25366	1.09773	0.835045	0.743145	1.51722	1.30585	1.02283	0.903645	0.922779	1.10317	0.820855	1.03686	1.28437	0.502378	1.19797	1.29496	0.957021	1.16788	1.24925	0.732212	1.00719	1.1144	0.889	0.856386	1.07437	1.33391	1.07752	0.973236	0.87846	0.881371	1.01133	1.16921	1.06295	0.848018	1.07199	0.930333	1.11495
336	chr1	208345902	208887442	1.08395	1.08129	1.76116	1.1236	1.42959	0.94501	1.14519	0.755896	0.93918	1.12193	0.974243	1.04588	1.25344	0.664366	1.27106	1.28349	1.12302	1.43026	1.14575	1.39427	0.922811	1.11141	1.38995	1.10769	0.603329	1.14607	1.15076	1.46039	1.10873	0.891603	1.00937	0.702516	1.03787	0.887016	0.975219	1.36986	0.639124	1.01731	0.914922	0.872226	0.981286	0.913707	0.882984	0.950881	0.979961	0.9724
337	chr1	208887443	209469269	0.934616	1.05924	1.37537	0.820151	1.08923	1.01691	1.32331	0.899811	1.14994	1.63221	1.22893	0.802298	0.907676	1.1068	1.34291	1.29252	0.905296	1.11988	0.911395	1.16857	1.09545	1.19439	1.02638	0.814884	1.07969	1.09978	1.27369	0.775997	1.04349	1.33131	1.05505	0.90182	0.978548	0.738035	0.651371	1.28286	0.914867	1.1423	1.04737	0.951435	1.18199	1.16972	1.43115	1.08322	0.827734	0.995256
338	chr1	209469270	209972310	1.15871	0.808036	1.04035	0.602527	0.955863	1.06137	1.06007	1.49061	0.557117	1.07803	1.64047	0.831529	0.731965	0.947423	0.986372	1.07786	1.22222	0.532506	1.1981	0.81618	1.21025	0.837755	1.29445	1.05712	1.02856	1.03657	0.647996	1.47481	0.90894	1.07816	1.22981	1.17729	1.03492	1.00933	1.51107	1.01239	0.952474	1.48099	0.92542	1.1243	1.13555	0.890889	1.11109	1.13517	1.05269	0.928228
339	chr1	209972311	210569208	1.20689	0.604413	0.9166	1.1801	1.13645	1.15616	1.07614	0.998697	1.03941	0.934799	1.47781	0.801133	1.12404	0.991976	1.19376	0.672478	1.4683	1.09376	1.2852	1.30068	0.876201	1.02105	1.05999	1.41238	0.677276	0.896222	0.922979	0.902691	0.983997	1.48676	1.04178	1.47884	0.792603	1.06535	1.0299	1.21598	0.817342	0.994782	0.976142	0.822617	0.930019	1.05424	0.954543	0.911361	1.2052	0.880542
340	chr1	210569209	211113375	1.09624	0.929453	0.970437	1.2769	0.769338	1.11327	1.12863	0.925391	0.620062	0.824247	0.992815	1.25686	0.875614	1.24462	1.28467	1.20021	0.989943	1.33029	1.20787	0.779407	1.19736	0.993638	1.20794	0.989539	1.30112	1.13222	0.836019	1.05184	1.16712	1.44419	1.18427	1.18047	1.14048	1.51658	1.91175	0.841247	1.14618	1.32462	1.14213	1.30614	1.25543	1.09034	0.724006	1.27363	1.05173	1.03058
341	chr1	211113376	211737059	0.846051	0.516994	0.942869	1.32207	1.33328	1.00395	1.24618	0.954262	0.862479	0.882325	1.18953	1.4137	1.09819	0.990007	1.33777	0.99657	1.18471	0.985855	0.825208	0.763136	0.98966	0.82678	1.51153	0.977909	0.861549	1.2456	0.98831	1.1312	1.18648	0.781748	0.807253	1.07763	1.23541	1.05304	1.54721	0.880821	1.19156	1.182	0.967759	1.05302	1.0891	1.33435	0.749572	1.01194	0.918871	0.996968
342	chr1	211737060	212295514	0.891463	0.744553	1.30706	1.17391	0.888199	0.751293	1.01683	1.18502	0.681869	1.04775	1.05675	1.17759	0.963378	1.21919	0.954784	0.998867	1.14442	1.15206	0.855994	1.33563	0.943461	1.11076	1.42873	0.76596	1.35738	0.818109	0.793181	1.0058	1.10615	0.786176	0.687363	0.975592	1.03868	0.706547	1.07798	0.834997	0.774712	0.884898	1.11724	0.782842	0.811251	0.859317	0.872084	1.03134	0.961598	1.0302
343	chr1	212295515	212843078	0.985745	0.479979	1.31818	0.959593	1.09722	1.00439	0.906657	0.562965	1.05592	1.38419	0.992232	1.15241	0.814885	1.2946	1.45384	1.11685	0.494571	0.794637	0.746742	0.718609	1.11608	1.08315	0.617137	0.710628	1.38419	0.936907	0.873843	0.66998	0.858438	0.911892	0.847017	1.06515	1.00755	0.977622	0.915027	0.838518	0.911905	1.03977	1.11398	0.735601	0.777936	0.68051	0.94042	0.773782	1.08108	0.885308
344	chr1	212843079	213453370	0.80033	1.02522	1.09128	0.956158	0.957792	0.910289	1.25309	0.899725	1.1685	1.46717	0.890899	1.31968	0.973053	0.947448	1.40919	0.93666	1.00901	0.700159	0.878169	1.19558	1.2126	0.740952	1.00406	0.989122	1.02572	1.00588	0.925369	1.36934	0.742235	1.3691	0.980739	1.0946	1.26885	1.0659	1.18343	1.32362	1.18115	0.979665	1.02976	1.01621	0.984673	1.2469	1.13642	0.902071	1.21707	0.949063
345	chr1	213453371	213977040	1.56379	1.21009	0.801027	0.898794	1.02433	1.29341	1.16148	0.774271	0.714023	1.64867	0.795788	1.19679	1.38825	1.05132	0.855276	1.11189	0.990392	1.13076	1.23881	1.20135	1.08266	1.05809	1.05084	0.985425	1.63333	1.09498	0.996036	0.833749	0.805094	0.856135	1.08581	1.25178	1.4011	0.980597	0.915377	1.15089	0.905923	1.14188	1.05016	1.5786	0.974024	1.00196	1.03435	0.734059	1.13458	0.787659
346	chr1	213977041	214535485	0.853493	1.02528	1.15635	1.15602	0.987011	0.843409	1.40514	1.2896	0.880897	1.36712	1.2654	1.36324	0.855176	1.08011	0.652006	1.02403	1.0072	0.917225	0.883792	1.28584	1.06383	0.95555	0.888621	0.568542	1.1017	1.11077	0.76051	0.809288	0.824835	0.846888	1.22207	0.864159	0.844783	0.597419	1.19971	0.889415	1.0174	0.811138	1.07553	0.847907	0.631827	1.18732	0.734334	1.1286	1.17211	1.20039
347	chr1	214535486	215089277	0.954867	0.841511	1.17486	0.991768	0.840903	0.831648	0.972043	0.733251	1.00486	1.35679	1.10017	0.956594	0.70467	1.27837	0.98577	1.1923	0.724536	0.907555	0.993145	1.16371	1.0867	1.07409	0.910212	0.815751	1.13301	0.988725	1.15571	1.02434	0.839399	1.38585	0.990219	0.534901	1.03941	1.35935	0.719899	0.866362	0.844764	1.0711	0.958207	1.19204	0.81797	0.845254	1.38882	1.01243	0.905099	0.931201
348	chr1	215089278	215681761	0.916229	0.762633	1.07866	1.0882	1.17567	0.945642	1.34883	0.850211	0.802211	1.03722	1.08813	1.09915	0.86004	1.14115	1.20284	0.973808	1.06899	0.708868	1.0441	1.29114	1.11886	0.868392	1.282	0.913226	0.985637	0.970514	1.16697	0.961129	0.948957	0.784457	1.16424	1.257	1.02486	0.751879	1.24135	0.954556	1.14524	0.8921	0.915798	1.21333	1.12954	1.34663	0.960547	0.740947	1.11872	0.930258
349	chr1	215681762	216280180	1.17414	0.40939	0.973525	1.16198	0.845027	0.857214	1.19824	0.870959	0.811641	1.40605	1.06717	1.00507	0.832632	1.11683	1.16104	0.885639	0.74864	1.10456	0.923009	1.35068	0.951167	1.2673	1.23435	0.904725	0.970197	1.04554	0.445341	0.930276	0.781687	0.701552	1.00527	0.675367	1.21442	1.30007	1.10991	1.03891	0.982593	0.975277	0.97175	1.01334	0.761491	0.752765	0.960992	0.764624	1.05465	0.899662
350	chr1	216280181	216880564	0.893701	0.361489	0.658445	1.03814	1.01339	0.942534	0.809113	0.958304	1.67708	1.05158	1.04697	1.0592	0.711128	1.05699	1.05414	0.909119	1.01868	1.0997	1.07042	1.31156	1.07697	0.852022	1.41205	1.49358	1.26618	0.820298	0.943586	0.796298	1.12533	1.19743	0.902899	0.621791	1.23283	0.764605	0.91066	0.782551	1.05694	1.11537	0.950347	1.29292	0.985933	0.801962	0.979673	0.830691	0.832865	1.16128
351	chr1	216880565	217451991	0.995436	0.453028	0.808782	1.03004	0.992955	1.0427	1.12557	0.815983	1.1534	1.21976	1.07782	0.512594	0.660685	0.895192	1.11671	1.30335	0.769182	1.04402	0.893324	1.32626	1.02372	0.928918	1.27424	0.59855	0.903701	1.10874	1.24305	1.22032	0.89752	0.751105	1.10652	1.02554	0.96478	0.453399	1.1356	1.14187	0.863892	1.31301	0.888281	0.982116	0.8416	1.25305	1.24135	0.965237	1.13172	1.19555
352	chr1	217451992	218084258	1.10823	0.8605	0.896445	0.997126	1.15946	1.21911	0.741891	1.02232	0.736135	1.28399	1.42878	1.39997	0.896905	1.05344	0.945827	0.915035	1.2241	0.97412	1.05937	0.926401	1.07632	0.842399	1.12185	0.992543	1.03661	0.90438	1.25006	0.734688	1.00532	1.01373	1.02711	0.705315	0.838434	0.908014	0.8739	1.11716	1.04515	1.10073	1.00409	1.28632	1.17717	1.18352	0.970759	1.3029	0.896757	0.962838
353	chr1	218084259	218682061	1.10221	0.985567	0.546726	0.922864	0.963058	0.927231	0.856078	1.44352	0.849407	0.944979	1.05791	1.13354	0.886634	0.860377	0.616122	1.04403	1.28011	0.833726	0.78432	0.874489	1.15604	1.08938	1.20768	0.882665	1.11347	1.27669	1.01203	1.00253	1.12647	0.988661	1.07913	1.06629	0.847516	0.938334	1.1567	1.20397	1.11774	1.41759	1.14677	1.02079	0.947744	1.17683	0.991435	0.917849	0.719374	0.989443
354	chr1	218682062	219258094	0.933195	1.11525	1.20193	1.13035	1.09656	1.17388	1.03402	0.992921	1.01734	1.49078	0.803628	1.6971	1.04083	0.991638	0.969614	1.13275	1.79373	0.652625	0.973471	1.04357	1.08391	1.11078	1.08958	1.02276	0.653331	1.15083	0.906388	1.3443	0.977779	1.13872	0.979529	1.01283	1.07889	1.27852	0.774492	0.852237	1.01763	1.24084	0.909125	1.23467	1.02685	0.939284	0.895501	0.830123	1.13177	1.16958
355	chr1	219258095	219833362	1.04063	0.973238	1.01565	1.04638	0.689287	1.19318	0.911865	1.18576	1.33796	1.17822	1.3497	1.04938	0.660268	1.13913	0.825077	1.1475	0.562935	0.729446	0.728314	0.673399	1.16607	0.803689	1.42235	0.990504	1.42139	0.949534	1.46774	0.992751	1.21814	1.09445	0.948648	0.658429	0.896006	1.17509	0.756295	1.0654	1.16672	1.11388	1.1353	0.796335	0.983104	1.16684	0.894769	1.06344	1.14515	1.05528
356	chr1	219833363	220447539	1.12369	0.8987	1.23855	0.921409	1.1829	0.955293	1.08248	1.2034	1.19374	1.40168	1.44529	1.18957	1.07834	1.15021	1.14606	0.709472	1.01877	0.977064	1.41263	1.63064	0.963781	0.996229	0.912237	1.02171	1.12882	1.09279	1.17271	1.65954	1.09171	1.48248	1.16715	0.946957	0.998094	1.16258	0.933087	0.752204	1.09158	1.08116	0.826415	1.22737	0.907615	1.19322	1.0404	1.4553	1.06901	1.24119
357	chr1	220447540	221025085	1.1433	1.11639	1.12842	1.03738	1.21728	1.02358	0.800626	1.09478	1.43959	1.29885	0.955712	1.01993	1.41924	0.716192	1.03305	1.28614	1.17865	0.769759	0.940192	1.19742	1.14288	0.832811	1.07829	1.26506	0.962828	1.18493	0.987157	0.940353	1.18979	1.28173	0.845707	0.822249	0.797718	0.79911	1.18174	1.10914	1.26867	0.976568	1.09162	0.856728	1.20156	1.27356	1.20031	1.13791	1.15396	0.884386
358	chr1	221025086	221585829	0.941546	1.0284	0.674331	1.02954	1.02073	0.646608	0.831082	1.00971	0.955691	1.08525	1.19367	0.740299	1.14539	0.999885	0.681452	1.10326	0.759136	0.880107	0.936073	0.827337	0.996218	1.42889	0.951562	0.92602	1.22156	0.906254	1.11855	0.952439	1.01648	1.21731	1.11767	0.823346	0.862963	1.37149	0.673064	1.34054	0.747922	1.39204	0.850611	0.85782	0.870439	1.02504	1.04619	1.05527	0.845066	1.32279
359	chr1	221585830	222133484	0.964918	1.25951	0.887393	1.09111	0.894738	1.06406	0.792694	1.24986	1.24124	0.893147	0.960261	1.00585	1.22666	0.985262	1.37813	0.882299	0.983389	0.904836	0.814191	0.802666	0.999891	1.22114	0.731684	0.744452	0.912983	1.0503	1.17169	0.959555	0.733465	1.18542	0.960094	1.01709	1.32584	0.711953	0.866671	1.30984	0.9809	0.940104	1.04597	1.09867	1.12939	0.945506	1.40832	1.29036	0.886679	1.24837
360	chr1	222133485	222667122	0.81022	1.20383	0.952495	1.04413	1.0543	0.995563	1.08779	1.05805	1.29491	1.13931	0.837476	1.26816	0.707861	1.06063	1.06846	1.37252	1.10086	1.07865	1.30756	0.8346	1.07938	1.21527	1.0696	0.72728	1.19713	0.934261	1.53435	0.845485	0.863621	0.977512	0.812104	0.936119	0.47627	1.05501	0.880681	1.22388	1.13628	1.21917	0.837452	1.21568	0.629862	0.981322	1.00807	0.916551	1.19399	0.958822
361	chr1	222667123	223250402	0.977562	0.79389	0.727005	1.13229	1.19929	1.16025	0.543825	1.111	1.14499	0.905247	1.37942	1.22694	1.01437	1.23368	1.26897	1.22496	1.53086	0.74404	0.932442	1.28956	1.11222	1.13456	1.13608	1.02649	1.12356	1.03034	1.28641	1.14894	0.954515	1.28984	1.14593	0.926313	1.38537	0.968012	1.14552	1.38417	1.07188	1.1969	1.27776	1.09353	1.16622	1.28188	1.32703	1.36299	1.00753	0.956967
362	chr1	223250403	223833477	1.03732	0.448681	0.668947	1.22281	1.00524	1.01742	0.869138	0.957593	1.30517	1.00581	0.572648	0.837894	1.35204	0.823546	1.27744	0.821002	0.938394	0.961744	0.617212	0.980723	1.11385	0.962857	0.832146	0.953757	1.24022	0.933778	0.639251	0.842038	1.22263	0.871051	1.01023	1.02419	1.35627	1.13979	1.11099	0.796339	1.31314	1.38457	1.12251	1.4999	1.03771	0.902632	0.779576	1.15401	1.06502	0.844564
363	chr1	223833478	224337984	1.2673	0.578823	1.29704	0.859273	0.976366	0.926352	1.12897	0.952516	1.34917	1.2528	1.61836	1.08093	1.12647	1.13873	0.636598	1.19494	1.08815	0.64997	0.59101	1.38237	0.917732	1.03885	0.740058	0.872384	1.10908	1.07355	1.09413	0.92932	1.00621	0.9433	0.951539	1.26976	1.19994	0.831614	1.56616	1.16203	1.3489	1.27674	0.774303	0.909393	1.08675	0.715109	1.06116	1.10494	1.26556	0.949568
364	chr1	224337985	224889289	0.968609	0.626882	0.96622	1.03854	1.04588	1.15323	1.19945	0.751478	0.698262	0.984118	0.989077	1.36168	0.742972	0.92546	1.51964	0.958059	1.04331	0.788894	0.684319	1.01301	0.962233	0.806791	1.05344	0.936654	1.14384	1.06019	0.968396	1.10714	0.822025	1.17922	0.791547	1.30388	1.28775	1.20052	0.625912	1.29873	0.645257	1.66543	1.02908	1.07669	0.758393	1.0443	1.03247	0.905124	0.902944	1.11647
365	chr1	224889290	225487471	1.05581	0.539384	1.44226	0.949873	1.07199	0.998772	0.541021	0.602929	1.33197	1.14726	1.12302	0.742362	0.801786	1.21378	1.65131	1.29878	1.10596	1.14377	1.47413	0.576206	0.929812	1.40326	1.05898	1.08421	1.67678	1.07643	1.10904	1.16353	0.874764	1.13591	1.0467	1.27523	0.766027	1.20708	0.826893	0.880354	1.20797	1.39481	0.915108	1.20184	1.1901	0.91133	1.07258	1.45653	0.843609	1.02703
366	chr1	225487472	226048750	1.00511	1.0454	0.65614	0.908862	1.0551	0.832116	1.21888	1.09451	1.43168	1.37159	0.923707	0.760843	1.64283	0.997359	1.32112	0.855509	1.20977	1.44263	1.24446	0.564939	1.09296	0.952765	0.809057	1.07423	1.17608	0.909672	1.61167	0.747643	0.735411	0.798499	1.0038	1.34801	1.02037	1.05748	0.743415	1.28415	0.967486	1.1749	1.09533	1.11939	0.879003	1.21031	0.983458	1.04295	0.992251	1.06228
367	chr1	226048751	226609263	0.709542	1.12462	1.38887	1.00307	1.28966	1.31537	0.919668	1.33779	0.924332	0.982552	1.17511	0.99748	0.810846	1.26007	0.924924	0.721483	0.920345	0.732083	0.756874	0.906358	1.04157	1.02306	1.02743	1.14293	0.881025	0.841101	0.926334	0.778151	1.06918	0.721507	1.15395	0.985865	0.919444	0.836321	1.30654	1.27541	1.30446	1.07348	0.84857	1.0602	0.885406	1.49779	1.23511	1.10186	1.05089	1.09996
368	chr1	226609264	227114271	1.23001	0.985171	0.973433	0.959466	1.00571	0.95548	1.09418	1.16965	1.1019	0.743272	1.60594	0.845398	1.07492	1.12618	1.11576	0.582811	0.936499	0.855708	0.875271	0.535681	0.99624	1.08974	0.896164	0.983838	0.993896	0.998102	1.16753	0.948546	1.13301	0.595432	0.866995	1.09754	0.959661	1.15823	0.984892	1.00849	1.06231	1.20915	1.16384	0.849265	1.14194	1.27952	1.07225	0.694032	0.725512	1.1021
369	chr1	227114272	227724540	1.38317	0.966326	1.10426	0.940963	1.24572	1.07675	1.25036	1.15351	0.969111	1.00812	1.25128	1.28387	1.24322	1.19993	1.29592	1.13215	0.981545	0.881105	0.829224	0.987116	1.07851	0.797869	1.12187	1.02835	0.986466	1.0806	0.988753	0.894976	1.18582	1.24239	0.861954	0.997841	1.15921	1.29683	0.739848	1.21438	1.10767	1.14416	1.10608	0.68668	0.83693	1.02289	1.57581	0.754358	1.34225	0.996852
370	chr1	227724541	228300742	0.769939	1.16829	1.22194	1.24274	1.00604	0.954638	0.935596	1.19508	1.02942	0.841019	0.737134	0.792513	1.31089	0.752216	1.37483	1.18545	0.669032	0.774842	0.892347	0.815349	1.01075	0.99119	1.18217	0.659167	0.879447	0.811457	1.35583	0.668286	1.10221	0.608243	1.13388	0.82316	1.24057	0.463769	0.841049	1.2116	0.859797	0.977309	1.14085	1.05427	0.930886	1.35558	0.99803	1.27902	0.904876	0.881485
371	chr1	228300743	228900282	1.14052	1.37381	1.35329	0.934848	1.19555	1.29253	0.786415	1.08715	1.34565	0.910634	0.887272	1.00076	0.571326	0.93813	0.862161	0.942323	1.41705	1.17002	0.830045	1.01401	1.1433	1.31417	1.35682	0.932647	0.798103	1.02613	1.24077	0.859998	0.771239	0.735577	1.03499	1.49384	1.12165	1.35146	0.978589	1.52862	0.929721	0.596985	0.873697	0.852065	1.06585	1.01362	0.738278	1.03129	1.18789	0.815119
372	chr1	228900283	229413963	0.981346	1.32223	1.044	0.854021	1.06103	1.0092	1.03169	1.27363	1.29439	0.964246	0.847653	1.22	0.88662	1.17229	1.11021	1.2169	0.714448	0.793426	1.39937	1.45818	1.04371	0.915599	0.962547	1.01131	1.06472	1.03508	0.934834	0.544996	0.977816	1.01925	1.05845	1.12233	0.803179	0.476679	1.01711	1.06351	0.866974	0.915913	1.26108	1.03177	1.01923	1.04787	0.918669	0.952913	1.00898	0.997931
373	chr1	229413964	229979436	1.15456	1.35421	1.01407	0.713594	1.20909	1.47151	1.09933	0.983925	1.21136	0.783004	1.63432	1.02427	1.06591	0.690401	1.12918	0.870973	1.2256	0.585308	0.96425	0.778299	1.14221	1.2156	1.25155	1.0334	1.02524	1.00748	1.10238	1.15262	1.13151	0.707616	0.861168	1.05587	0.982769	0.830444	1.09397	1.48214	0.924797	1.07311	0.904862	0.913421	0.85887	1.04635	1.63261	0.903805	0.841163	1.27002
374	chr1	229979437	230498643	1.28661	0.995559	0.948225	0.761418	1.29161	0.986916	0.930688	0.975154	0.969975	1.24321	1.53536	1.43912	1.16285	1.1266	1.38347	0.975427	0.848486	1.22459	1.31451	0.815489	1.044	1.21638	1.04012	1.17296	0.668935	0.997349	1.20482	1.03242	0.790301	0.582883	1.06661	1.44836	0.713496	1.27995	0.685779	1.39114	0.833662	0.921288	1.03679	0.930525	1.20969	1.08116	1.29321	0.903085	0.878124	1.09564
375	chr1	230498644	231022031	0.775787	1.16632	1.4181	1.25385	0.859462	1.35309	0.768805	1.05295	1.00968	1.25832	0.999725	1.48464	1.03916	1.02418	1.25643	1.26158	0.720226	0.52477	1.51555	0.730238	1.08587	0.842767	0.581664	0.90564	0.678382	1.07872	0.715757	0.80465	0.959862	1.11	1.05737	1.24725	1.07908	0.752086	0.498791	1.02979	0.847106	1.75533	0.995906	1.01289	1.07279	1.24003	0.694021	0.91874	1.09636	1.17264
376	chr1	231022032	231580613	1.05985	1.02364	1.00386	1.03694	0.881232	1.10704	1.06041	1.27035	1.06998	1.11717	0.738593	1.04988	1.28121	0.923759	1.1262	1.01553	1.3148	0.923458	1.39976	0.876528	0.908711	1.40715	0.934692	1.27722	1.38599	1.02774	1.38343	1.32753	1.06776	0.754636	0.997348	1.44621	1.17809	1.84811	0.939757	1.3406	1.22606	0.682827	1.10599	1.26747	0.724431	0.715036	1.12337	1.34813	0.965091	1.19848
377	chr1	231580614	232134928	1.16245	1.04357	0.97416	1.02231	0.816599	1.13205	1.00229	1.15102	1.23705	0.724247	1.02207	0.944426	0.727735	0.75413	1.28633	0.886263	0.767238	1.10735	1.16371	0.892235	1.09799	1.23628	0.76589	1.35884	0.775088	1.06633	1.12982	0.708685	1.10472	0.933055	1.23886	1.41256	1.59715	0.988209	1.22435	1.26851	0.686321	1.22751	1.23776	1.05286	1.19414	0.739167	0.836482	1.17607	1.42607	0.834261
378	chr1	232134929	232692731	1.11498	1.12475	1.15484	0.691382	0.70168	1.00363	1.05466	0.840016	0.963531	0.883845	0.792618	1.11187	0.498593	0.930319	1.19414	0.967198	1.01874	0.575389	1.19513	1.05382	1.02285	0.898276	0.81518	1.16605	1.25756	0.83237	0.894475	0.95806	1.09129	1.3138	1.08505	1.08352	0.869678	0.96876	1.16665	0.925943	1.19394	1.18064	1.05876	0.892319	1.18393	0.79961	1.0028	1.05549	1.19264	1.10853
379	chr1	232692732	233240245	0.916399	1.54002	0.749055	1.01171	0.935484	0.797957	0.966788	1.41341	1.35169	1.31272	1.05604	1.38041	0.753736	1.08432	0.763976	1.02572	0.511783	0.773475	0.953678	1.18902	0.886281	1.0075	0.817059	1.0805	0.976949	1.02272	1.40978	0.741331	0.937198	1.19696	1.05374	1.19463	0.698952	0.486943	0.92921	0.927532	0.898086	0.964346	1.07039	1.02972	0.842761	0.768585	1.19674	0.969979	1.00715	1.19952
380	chr1	233240246	233825485	0.649786	1.19343	0.750643	1.00769	0.904928	1.02144	1.07417	1.33015	1.36905	0.927961	1.20712	0.830102	0.65217	1.17615	1.78178	0.991393	0.951052	0.598768	0.983316	1.27224	0.823112	0.950437	1.35956	1.25896	0.983959	0.945873	1.14544	0.472037	1.3226	0.891283	0.951969	0.821333	0.918719	0.421559	0.807952	1.11927	0.812163	1.21966	1.05167	0.77107	0.959146	1.02581	0.673356	1.28143	1.05488	1.03567
381	chr1	233825486	234420944	1.31121	1.20149	1.03138	1.10294	0.666799	1.25939	1.22531	1.29319	1.09993	1.05003	1.18465	0.919791	0.523353	0.74052	0.978935	0.994945	0.840055	0.785754	1.06134	1.24292	1.19319	1.22498	1.22011	0.849907	0.942276	1.06395	1.62054	0.976768	0.902968	1.55129	1.1616	1.06901	0.797455	0.682137	1.27641	0.889973	1.22274	1.32334	1.06955	0.953442	1.31246	1.46001	0.946405	0.982963	1.09417	1.01272
382	chr1	234420945	234928176	0.829519	0.713946	1.13253	1.13557	1.10502	1.1304	0.789464	1.03974	0.868697	0.915415	0.64895	0.669133	1.18217	0.997843	1.08078	0.793718	0.872065	1.27995	0.889456	0.672626	0.887047	0.728219	1.07058	1.27207	1.06932	0.901468	1.47707	1.86896	0.669792	1.00688	1.03633	0.717013	1.20648	1.10699	0.834652	0.656532	1.23268	0.700997	0.767425	0.964947	0.980834	1.14096	0.774444	1.23814	0.885008	0.902794
383	chr1	234928177	235499192	0.964699	1.25342	1.21632	0.784014	0.913247	0.963336	0.552669	1.11319	0.75585	1.20526	1.21804	0.849733	1.06358	1.40135	0.895044	0.978012	0.706407	1.27261	1.0972	0.613572	0.837355	1.01606	0.99541	0.673436	1.49319	0.961525	1.19169	1.34338	0.752512	0.900432	1.00363	1.16917	1.08482	1.38119	1.29431	0.816412	1.07548	0.996598	0.822367	1.15806	0.64105	0.981698	1.27479	0.995983	1.0266	0.919571
384	chr1	235499193	236083770	1.16142	1.0707	1.0117	1.27553	1.18704	1.02092	0.950002	1.62696	1.18968	1.58275	0.862355	0.867648	0.876966	1.07275	1.09263	0.614421	1.11965	1.56312	0.898138	1.39612	1.12664	0.925591	0.739346	0.954029	1.51225	0.872272	1.31719	1.05336	1.06679	1.48662	0.962962	1.3564	0.89733	1.29246	0.724403	1.23937	1.20811	0.653066	1.05026	1.44256	0.722783	0.943025	1.06501	1.23065	0.73525	1.08737
385	chr1	236083771	236652841	1.1743	1.08407	1.39362	1.48631	0.916972	0.709258	0.867413	0.959654	1.23766	1.00404	1.19001	0.920956	0.992487	0.746961	1.39747	1.3086	0.755317	1.00452	0.78042	0.935432	0.923375	0.849189	1.26701	1.092	0.764624	1.0029	1.44811	1.25398	0.944058	0.948076	1.07787	1.3088	1.08851	1.24666	1.33562	1.14879	0.883873	1.03648	0.887613	0.648744	0.645198	0.921808	1.02963	1.24507	0.853125	0.954921
386	chr1	236652842	237249595	1.27437	0.697566	1.34968	1.0733	0.862029	1.08992	1.23326	1.12025	1.28663	1.12103	0.894327	0.688223	1.38724	1.0085	1.04611	1.28776	1.5498	0.964466	0.929121	1.07159	1.07399	0.893579	1.36307	1.26542	1.05886	1.26628	1.1893	1.66637	0.804994	0.947062	1.12941	0.660128	1.11761	0.713445	1.14575	0.841149	1.02607	1.11126	1.15789	0.95249	0.847841	1.06088	1.03675	1.31689	0.967086	1.17524
387	chr1	237249596	237888224	0.969838	0.638673	1.04197	1.13442	1.18572	1.36147	1.23363	1.74751	1.20203	1.06986	1.2335	1.38309	1.8554	1.26414	1.41425	0.944188	0.889399	0.849466	0.984711	1.33925	1.07608	0.871201	1.31864	0.801147	1.63162	0.992504	1.08802	0.883667	0.783366	1.19452	1.4629	0.696828	0.9495	0.527384	0.984031	0.741064	0.993674	0.904552	1.22547	0.930294	1.09861	1.06134	1.16081	0.985674	0.966443	0.959358
388	chr1	237888225	238479387	1.19456	0.489352	1.53604	0.932398	1.18345	1.19483	1.22159	0.866482	1.38304	0.987554	1.16101	0.811908	0.987073	1.11262	0.841118	1.29107	0.833999	1.41276	0.914986	1.1014	1.13096	1.09177	1.64593	0.795388	1.36281	0.941647	1.22183	1.2519	1.18972	1.17169	0.95297	0.775359	0.996617	1.06363	0.73145	1.14445	0.925288	0.994908	0.864271	0.795028	1.43933	1.31816	1.20623	1.07501	0.995164	1.17849
389	chr1	238479388	239131960	0.914729	1.08412	0.913859	0.804126	1.15798	1.02025	1.26721	1.34917	0.735564	0.680256	1.14003	0.920719	1.42216	0.778098	1.39066	1.1373	1.33175	1.09928	0.925353	0.873662	0.995356	1.18627	0.894515	0.968398	0.912002	1.05496	1.0956	1.55379	0.85283	1.07712	1.00504	0.683455	0.874934	1.56609	1.5281	1.48738	1.08386	0.736909	1.23533	0.892639	0.985536	1.46032	1.00764	1.23657	1.03093	1.10146
390	chr1	239131961	239729365	0.957087	1.11762	1.62009	0.812454	0.906704	0.96342	1.48233	1.90916	1.51631	1.14445	1.31013	0.935339	1.11034	1.26858	1.15512	1.11276	1.23547	0.782639	1.03114	1.17062	0.944245	1.25238	1.08632	1.14028	0.904282	1.05529	1.01823	1.21959	0.861198	1.17666	1.00342	1.41722	0.752103	1.38583	1.43408	0.835142	0.904359	0.991233	1.20654	1.20017	1.03762	0.987423	1.27316	1.25784	1.30793	1.17987
391	chr1	239729366	240310752	0.443461	0.672716	1.34912	0.909538	1.38152	1.1371	1.16341	1.14396	0.770207	1.0753	1.66021	1.04295	0.612132	0.920767	0.701548	1.27283	0.858158	1.45211	0.723474	1.35226	0.888084	0.859072	1.79042	1.12034	1.10057	0.980321	1.24536	1.33499	0.913837	1.30436	1.02374	1.06936	1.31755	0.960812	0.695235	1.13117	1.24376	1.06773	1.06507	1.03816	1.09495	1.28415	0.755263	1.0947	0.806534	1.17981
392	chr1	240310753	240866943	0.803171	0.581533	0.736592	1.07075	1.0366	0.914976	1.51356	0.999135	0.781922	1.42699	0.89252	1.50347	1.09768	1.1208	0.836246	0.851333	1.29373	1.36782	1.12011	0.961917	1.05727	0.854531	0.892394	0.954853	1.20034	0.85918	0.985918	0.847229	0.795793	1.2635	0.932757	1.2592	0.927836	1.40202	1.08978	1.21254	0.814131	1.15241	0.816944	0.871473	0.946056	0.787966	0.988857	1.10123	0.938042	0.934954
393	chr1	240866944	241452746	1.05205	0.405554	0.983494	0.954371	1.1899	1.06441	1.54572	1.11138	1.1978	0.959018	1.17768	1.2611	0.85168	1.15755	1.38288	0.758178	1.21157	0.797209	1.18251	1.09919	1.24473	1.07477	1.17574	0.933451	1.15168	0.98044	1.26487	1.22108	1.15813	1.42113	1.12982	0.793648	0.735524	0.807144	0.839147	1.07584	1.01701	0.945269	0.991949	1.18048	0.818913	1.24946	1.54858	1.14786	0.746083	1.00828
394	chr1	241452747	242061198	0.758314	0.800214	1.03165	1.3321	1.16939	1.34442	1.55445	1.12181	0.72021	1.08979	1.3908	0.848779	1.0117	1.20472	1.03412	0.990385	1.47428	1.28727	1.06756	1.23833	1.08966	0.934795	1.14251	0.985585	0.518473	1.03487	1.0982	0.955698	1.06758	1.65773	1.10191	1.03855	0.858783	1.17618	0.980627	0.425433	0.695004	1.1545	1.21941	1.26794	1.11155	0.893611	1.3674	1.1444	1.07924	1.20602
395	chr1	242061199	242635007	1.11564	0.795835	0.950797	0.922652	1.02911	1.34561	1.02453	0.801929	1.28991	1.37576	1.22172	0.871153	1.39172	0.889298	1.33732	1.08441	1.74246	0.878553	1.13497	0.703686	1.02192	1.31972	0.660298	0.921997	0.61271	1.02927	1.05501	0.958396	1.05295	1.40579	1.19632	1.0179	0.761869	1.10236	1.09917	1.19102	0.955872	0.911917	1.04221	1.1363	0.966296	1.06564	0.721683	1.46501	0.984113	0.911594
396	chr1	242635008	243217070	1.16611	0.896054	1.00223	1.05959	0.822408	1.18413	1.11402	1.36727	1.12672	1.42888	1.22015	0.990246	1.11628	1.26496	1.17318	0.991353	0.692228	0.775079	1.00367	1.20076	1.0645	1.0778	1.11519	1.47627	1.17864	1.09019	1.24056	1.06639	1.10892	0.97368	1.20717	0.996397	1.1912	0.975983	1.07154	1.06475	1.41403	1.36462	0.953858	1.01946	0.83373	1.20911	1.23569	1.1586	1.04868	1.32322
397	chr1	243217071	243791329	1.18397	0.578977	1.50765	1.13878	1.03886	1.19878	1.69881	1.15923	1.08403	0.96032	1.32505	0.881267	1.32356	1.35133	0.992377	1.79705	1.01133	1.18537	1.21622	0.699018	0.849672	1.49421	1.06646	1.57186	0.976355	1.02782	1.3199	1.20372	1.05048	1.00228	0.884918	0.966355	1.09085	1.00479	0.878698	1.05845	0.751351	0.937405	0.885828	1.08836	0.711673	1.23475	1.33014	0.952437	1.0769	0.947212
398	chr1	243791330	244337701	1.2193	1.16774	1.2687	0.966728	0.922413	1.0058	1.30125	1.18642	1.04106	0.9485	0.799298	1.13193	0.830274	0.792749	0.935	0.946457	1.15942	0.889172	1.11557	1.06921	1.03628	0.796099	1.14341	0.787463	0.950477	0.974605	1.14885	1.07773	0.989755	0.792706	0.856837	1.10789	0.960435	1.05154	1.20982	0.783514	1.12746	1.34038	0.97495	0.699099	1.34434	1.28435	1.38416	1.16146	0.956031	0.789039
399	chr1	244337702	244909639	0.849909	0.790263	1.47652	0.754396	1.14204	0.976714	0.951901	1.85223	0.810535	1.48368	1.02629	0.807954	1.0948	1.00854	1.23676	1.22938	1.50657	1.36355	0.960097	1.07164	1.03884	0.993312	0.857054	0.896046	1.05897	0.80795	1.15739	0.920585	0.704327	1.26328	0.927655	0.798784	1.35932	1.47177	0.9172	0.708384	0.844742	0.83895	0.957031	0.952435	1.16152	1.09035	0.975025	0.820324	0.925317	1.20815
400	chr1	244909640	245477991	0.895589	1.33142	1.17205	1.09907	1.19938	1.3789	1.06724	1.42491	0.610609	1.40903	1.34866	1.40612	1.50264	0.910452	0.694261	1.16431	0.967664	0.668416	0.960706	0.777836	1.16205	1.07999	0.955362	0.737311	1.00319	0.920411	1.2263	1.02925	1.06191	1.12473	1.16014	1.56246	1.16918	1.05769	1.10117	1.16764	1.14014	0.510977	0.92914	0.618191	0.573898	1.10005	1.27168	1.17823	1.04954	1.32055
401	chr1	245477992	246008178	0.939741	1.40824	1.06234	1.13576	1.22727	1.12161	1.1185	0.930268	1.15497	1.08741	1.17057	0.999301	1.07705	0.935859	1.00514	1.11153	1.26257	0.952139	0.807691	1.39002	0.825665	1.01201	1.00731	0.841443	1.07948	0.931669	1.10543	1.11674	0.730869	1.66029	1.08033	1.0329	0.638224	1.31399	1.03368	0.515351	1.12952	0.715444	1.15275	1.06749	0.715126	1.21025	1.19732	0.939819	0.843893	1.19553
402	chr1	246008179	246605588	0.761355	1.1116	1.10852	1.12068	0.904832	0.87376	1.7333	1.21925	0.858168	1.31426	0.91494	1.03784	1.44953	0.862125	1.55519	1.51724	1.12369	1.26296	1.10512	0.858228	0.970699	1.25979	1.2092	1.40969	1.13803	1.08182	1.1137	1.11618	1.26638	1.6532	1.04083	1.09641	0.709739	1.35249	0.915735	1.08077	1.0458	0.871006	1.03649	1.13095	1.26914	1.43584	1.31801	1.28115	0.886563	0.991384
403	chr1	246605589	247217124	0.910983	1.09799	1.06868	1.14104	0.956436	1.48427	1.28586	1.58316	1.01273	1.43916	0.851669	1.36608	1.04383	1.05862	1.13021	1.26836	0.800457	1.50415	0.871208	1.15734	1.01749	0.951071	1.46235	1.16324	1.32489	0.999943	1.07386	1.79999	0.857329	1.63899	0.888705	0.851899	0.974895	0.730722	1.55779	0.798469	0.573956	1.2026	1.08044	1.09298	1.49223	0.97289	1.41185	0.864267	1.07393	0.957035
404	chr1	247217125	247822196	0.963736	0.867093	1.23152	1.26555	1.22508	1.50801	1.595	0.726093	1.06701	1.03865	1.17362	1.19284	1.01634	1.10827	1.12071	1.0348	0.769038	1.14867	0.839904	1.27222	1.08623	0.792522	1.12059	1.23404	1.18204	1.09445	1.36372	1.10256	1.30954	1.08438	1.17725	1.09796	1.00161	0.787563	1.10087	0.841137	1.09188	0.942927	0.877078	1.33879	0.752918	0.828917	1.23413	0.843798	0.976245	1.09748
405	chr1	247822197	248521468	0.860371	0.644794	1.03556	0.96501	1.35991	0.847301	1.63354	1.12385	1.10795	1.17812	1.19213	1.05812	0.720222	1.10876	0.904605	0.983555	0.758291	1.29917	1.27364	1.04378	1.02536	0.80549	1.17061	1.10555	0.886643	1.08751	1.34266	0.90022	1.18235	1.29538	0.891607	1.31162	1.14222	1.17919	0.982469	0.816474	0.835037	1.13426	0.894367	1.13705	1.03365	1.53697	1.07098	1.17628	1.24154	1.12996
406	chr1	248521469	249250621	0.75451	1.07816	1.19751	1.02708	0.542105	0.806981	1.5319	1.13206	0.812445	1.22726	0.876158	1.14058	1.03869	0.907202	0.984962	1.16392	0.944854	1.28781	0.975507	1.14016	1.01224	0.88008	0.817637	1.10428	1.08438	0.835171	0.71359	1.27751	1.04835	0.886154	1.13996	0.929856	0.847813	1.24143	1.10491	1.06334	1.02977	0.992541	0.969749	0.994302	1.02089	0.881608	0.898613	1.07218	1.11425	1.01835
407	chr2	1	612530	1.0663	0.934555	0.738655	0.996412	1.23033	0.969903	0.718461	0.968583	0.550869	1.08294	1.11527	0.792456	0.711201	1.0773	1.37613	1.07393	1.04509	1.68254	0.958968	1.16368	1.00585	0.930322	0.838831	1.14837	1.48876	1.06025	0.979969	0.980544	0.612538	0.952868	1.06177	0.716243	1.0765	0.873798	0.907692	1.00441	1.10911	1.48003	1.01014	0.909934	1.07155	1.05992	1.08117	0.723434	1.16399	0.999388
408	chr2	612531	1250706	1.08538	0.878512	0.847555	0.939939	1.10773	1.32143	1.22165	1.06061	0.765343	0.717443	1.49333	0.974944	1.0349	1.07525	1.15597	1.50084	1.02522	1.07594	1.02066	1.31619	1.11631	1.0074	0.740545	0.999353	0.862304	1.16923	1.30631	0.942733	1.1013	1.03398	0.768009	0.893506	1.28204	0.99637	0.815849	0.978061	1.19198	0.810662	1.14514	1.06851	0.94324	0.945872	0.730537	1.25453	0.987343	0.86266
409	chr2	1250707	1830041	1.29314	0.537036	1.042	0.787891	0.976696	0.832458	1.2946	0.89727	1.2694	0.951736	1.28464	0.792009	1.10243	1.06413	1.72461	1.45966	1.18645	1.45123	0.86337	0.737703	0.933639	0.859482	0.82995	1.3209	1.41249	0.976881	0.781496	1.10102	1.32553	0.608287	0.950546	0.98395	1.06434	1.0769	0.881164	1.30391	1.20485	1.26658	0.784386	0.852273	1.03124	1.07387	0.961436	0.837559	0.839165	0.982153
410	chr2	1830042	2387486	1.0663	0.756481	0.825491	0.854142	0.709946	0.993028	0.684178	1.31752	0.780497	0.981356	1.04734	1.00588	0.860426	1.03489	0.884668	1.16617	1.13213	0.791915	1.45431	1.09679	0.925088	1.52857	0.876883	1.05277	0.911326	0.882464	0.816517	1.15888	0.796448	0.771161	1.18612	1.07433	1.03342	0.965688	1.32359	1.00434	1.1092	1.57311	1.10312	0.829605	0.850835	1.14848	1.14285	0.859193	0.969953	1.05638
411	chr2	2387487	2961455	1.19917	0.915545	0.764282	1.01819	0.850687	1.17706	1.36958	0.943941	0.894171	1.13486	1.45657	0.625748	1.38586	0.776153	1.27777	0.839107	1.38456	0.827021	0.801492	1.02751	1.15952	1.75246	1.07989	0.933142	0.968742	1.08554	0.834653	1.46004	1.12799	1.61699	1.20222	1.27097	1.33453	1.22618	1.26376	1.16319	0.855756	1.64793	0.922798	1.15207	1.05345	0.766405	1.26175	1.12004	0.933073	1.11148
412	chr2	2961456	3587185	0.992553	0.99234	1.184	0.805427	0.864884	1.11156	0.978121	0.951415	0.84857	1.27652	0.56128	1.17509	1.5016	1.16731	0.933832	0.977237	0.931149	0.820888	1.27022	1.16099	1.18855	1.05769	0.752446	0.852276	1.19074	1.08303	0.979417	0.994385	0.842188	0.596501	1.01027	1.10447	0.896523	0.736444	1.10953	1.09574	0.887746	0.837798	0.714739	1.27646	0.931868	1.18633	1.2048	0.716145	1.04888	0.966081
413	chr2	3587186	4161088	0.785107	0.898434	1.35502	1.33191	1.18724	0.869582	1.03313	1.07841	1.12999	0.963827	0.398314	0.562564	1.46945	1.01168	0.360222	1.23917	0.620772	1.21532	1.4772	0.90847	1.04386	1.31621	1.18969	1.01371	1.07993	1.00158	0.859518	0.868233	1.23609	1.25755	1.05893	0.793948	1.21883	0.96409	1.29774	0.506892	0.824817	1.15915	0.980131	1.00641	0.690509	0.862122	1.0327	0.890905	1.02007	0.965471
414	chr2	4161089	4792342	0.846576	1.05299	1.16044	1.1534	0.625048	1.26937	1.01444	0.972654	1.03205	1.02317	0.919319	1.04385	0.988014	1.03474	1.47304	1.26529	1.04321	1.02177	0.843288	1.16785	1.07147	1.11352	1.4601	0.902757	0.91012	0.989884	1.10705	0.909542	1.20001	0.810392	0.926332	1.06481	1.05941	0.893345	1.23238	0.785834	1.38089	0.961523	0.993491	0.968656	1.09951	1.5084	1.19612	1.1629	1.14407	1.11883
415	chr2	4792343	5530792	0.986873	1.03773	0.851693	0.999003	0.982217	1.41153	0.955721	0.877069	1.56582	1.27845	1.21055	0.871427	1.10216	0.835205	1.5719	0.827722	0.858121	1.42005	1.16405	0.927061	1.23198	0.620981	1.28675	0.937643	0.838375	1.07757	1.05849	1.29174	1.02678	1.10485	1.01922	1.05523	1.07007	0.55325	1.2655	1.34391	0.992372	1.13773	1.25635	1.01499	1.0663	1.49975	1.33031	0.866989	1.14044	1.26578
416	chr2	5530793	6119991	1.43186	1.35209	1.49933	1.21844	1.49249	1.49213	0.764299	1.19054	1.60693	1.28574	0.725033	0.824512	0.512067	1.04645	1.28563	1.42011	0.853755	1.50613	0.827228	0.988365	0.981537	1.29927	1.14631	1.14506	0.900288	0.982978	0.782339	0.799974	1.10434	1.02657	1.24106	0.638974	0.949007	1.03781	1.22505	1.52906	1.16421	1.11932	0.913137	1.16086	0.913034	1.15243	1.05187	1.02508	0.902545	0.911488
417	chr2	6119992	6723426	1.09903	0.989952	1.17333	1.1478	0.828223	1.82422	0.936394	1.32864	1.01179	1.27646	0.799345	1.09276	1.33502	1.23777	1.37905	0.763399	1.28566	1.13747	1.4188	0.996638	1.11255	1.09792	1.42797	0.713861	1.0947	1.00992	0.82312	1.4628	1.11592	1.32007	1.04913	0.985779	1.13592	0.671928	1.0855	0.593644	0.895592	0.941103	0.969521	1.04692	0.847695	1.14919	1.08149	0.995149	0.887544	0.837412
418	chr2	6723427	7275270	1.43906	1.07892	1.3818	1.066	0.854703	1.37143	0.690799	1.52044	0.887107	0.958979	0.638334	0.717324	1.07033	0.897333	0.995886	0.759221	0.862942	0.73044	0.836629	1.29578	0.960181	0.913705	1.0791	1.10622	0.813335	1.00096	0.861105	0.662866	0.80731	1.69952	1.21463	0.704314	1.05718	1.19606	1.05044	0.885102	0.821052	0.768319	1.05661	1.03676	1.20447	0.942424	0.82019	1.01808	1.08302	1.18635
419	chr2	7275271	7842626	1.04156	1.26157	0.533266	1.10976	0.856064	0.830706	1.11943	0.715824	1.26477	0.956286	1.0057	1.13101	0.689677	0.922478	0.93413	1.26955	0.688241	1.08171	0.844567	1.41509	0.879869	0.893251	0.724975	0.909118	1.35767	1.08673	1.33851	1.64187	1.06534	1.30842	1.2241	1.01205	1.16502	1.50021	0.62585	0.784379	0.566094	0.892874	0.854155	0.875788	1.15511	1.08039	1.1002	1.12343	0.851603	0.862053
420	chr2	7842627	8386014	0.938507	1.18378	1.05625	0.995036	1.02684	1.22354	0.896211	0.92035	0.823815	0.625022	0.923367	0.821559	0.798364	1.02694	1.00076	1.15127	1.06479	1.17603	1.13282	0.828274	0.983575	1.01454	0.843439	0.832926	1.48715	0.909226	1.1315	1.32646	1.00626	1.32981	1.14852	0.941742	0.561362	0.58258	0.683995	1.0067	1.01436	0.881189	1.07191	0.782886	0.816246	0.916843	0.465051	0.96287	0.838494	0.998699
421	chr2	8386015	8903811	1.04294	1.0462	0.675215	1.16573	0.976136	0.721041	1.26942	0.574019	1.44052	1.02544	0.687177	1.05068	1.06479	0.998222	1.42741	1.01847	0.992985	1.29322	1.09938	1.27361	0.944387	1.10776	1.07528	0.801008	0.756625	1.00858	0.902628	1.54857	0.842192	1.36438	1.1626	0.807428	1.0626	0.986502	1.17313	1.44671	0.88927	1.11015	1.16644	0.926458	0.789627	0.852035	1.0581	0.927185	1.08312	1.28047
422	chr2	8903812	9430458	1.30296	1.08692	0.368887	0.879958	1.03179	0.832121	1.2529	0.932071	1.01678	1.30454	1.02733	0.943982	1.12051	0.764327	1.1732	1.18004	0.987422	1.10806	1.08888	0.765191	1.13916	0.986017	1.2717	1.10558	0.904984	1.05397	0.916556	0.835932	0.939853	0.752044	1.07252	0.74485	1.0643	0.920947	1.01838	0.885267	0.967672	0.881449	0.625804	0.545945	0.814549	1.26972	1.01449	1.24304	1.01395	0.902892
423	chr2	9430459	9945760	0.895142	1.12344	1.25019	0.969085	1.3816	0.966375	0.81078	0.966517	1.05802	0.979026	0.923587	0.802259	0.960943	0.943929	0.984989	0.783431	1.32115	0.931143	1.24554	1.11292	0.901515	1.21722	0.710379	1.20583	1.27352	0.991973	1.05723	0.271687	0.790972	1.1539	1.03261	0.676568	0.759601	0.536647	0.789865	0.897883	0.777998	0.77943	0.798925	0.836471	1.0782	0.958272	1.02855	0.979452	0.769391	1.13281
424	chr2	9945761	10475708	1.11552	1.17545	1.26519	0.90965	1.09123	1.34815	1.11661	1.27837	0.838436	0.83966	1.54392	1.0692	1.38979	1.23511	1.36752	1.06316	1.12821	0.839926	1.18132	0.582384	0.95952	1.65068	1.02001	0.887265	1.32046	1.1232	0.911841	1.23578	0.923967	0.810903	1.14341	0.934981	1.15033	0.726721	0.759461	1.21809	1.03028	0.810324	1.05343	1.01955	0.996473	1.25742	1.31225	1.07975	0.837911	0.768154
425	chr2	10475709	11003433	0.790941	1.68157	1.26409	1.18188	0.956863	0.969748	0.82909	1.14754	1.29253	1.16291	1.03583	0.967551	0.878601	1.27451	0.906831	0.850148	0.815058	1.23914	1.10723	1.12041	0.869188	1.22094	1.01466	1.08184	1.16506	1.02476	0.907457	0.948632	1.08139	1.0127	1.04218	0.963819	0.949897	1.51349	0.805885	1.31937	1.2673	1.29408	1.13446	1.27266	1.03204	0.939869	1.14514	0.905852	0.855899	0.902167
426	chr2	11003434	11557325	1.05632	1.11578	0.972351	1.13386	1.20206	0.63934	0.943987	1.04987	1.05996	0.644975	0.756152	1.0621	1.07807	1.12993	0.502564	0.901385	1.03944	0.789044	0.939259	1.71446	0.853043	1.5869	1.04483	0.874468	0.678729	0.990796	1.10448	0.981782	0.710667	1.19471	1.26577	1.42374	0.857572	1.21754	0.916213	1.31331	1.03544	0.585692	1.02499	1.20412	0.942555	0.973851	1.06962	1.02883	1.24578	0.896543
427	chr2	11557326	12103599	1.18595	1.84602	0.807237	0.709403	0.853412	0.854552	1.13201	0.812206	1.07402	0.737526	0.89163	0.903592	1.27793	1.02036	0.820734	1.41196	1.06167	0.765186	1.02187	1.01321	1.03393	0.92614	0.593138	1.14395	0.789347	1.06517	0.962295	0.780974	1.04881	1.20411	1.03881	0.873926	0.875727	1.08371	0.912833	1.2734	0.980073	0.718379	0.914453	1.22872	0.557737	0.960029	1.02851	0.916129	0.90204	0.918533
428	chr2	12103600	12658986	0.700961	1.56592	0.669939	1.1375	1.38212	1.26267	0.763441	1.26306	0.741829	1.13218	1.14862	0.864142	1.24008	1.0512	0.875757	1.2202	1.32766	1.07968	1.41379	1.11455	0.955607	1.53203	0.89953	1.41768	0.954838	0.914191	1.24307	1.36593	0.838664	1.02014	1.19403	1.2704	1.19354	0.943288	1.26539	0.875632	1.01799	1.01145	0.964126	1.15373	0.89824	0.99453	1.01624	1.12318	1.16841	0.9522
429	chr2	12658987	13221735	0.911337	2.07623	0.849423	1.04683	0.949941	1.09398	0.8333	1.03474	1.14554	0.906851	0.833472	1.01575	0.980738	1.23288	0.938758	1.28218	1.44809	0.641595	1.14382	0.882583	1.06845	1.10357	1.05816	0.756472	0.681183	1.07862	1.18844	1.53114	0.896487	1.0111	1.00108	1.42281	1.00312	0.926904	1.39841	1.03826	1.18825	1.09509	0.975797	1.01239	1.10325	1.28213	0.78793	0.860689	1.34233	1.07796
430	chr2	13221736	13883879	1.09913	1.80636	1.15762	1.04048	1.05164	1.0811	1.04537	1.20305	1.02338	0.988875	0.770426	1.08326	0.989925	1.09743	1.16218	0.885321	0.961066	1.16268	1.37116	1.68553	0.955066	1.08155	1.05927	0.708928	1.3097	0.951161	0.853973	0.568033	1.09915	1.09907	0.907443	0.984674	0.806468	1.41423	1.23108	0.915972	0.968325	0.947391	0.9534	1.45469	0.950077	1.06	0.971292	0.920929	0.76259	0.839735
431	chr2	13883880	14533355	0.954258	1.27781	1.04965	0.806319	0.734628	1.40964	1.33431	0.84954	1.23649	1.07992	0.504095	1.16709	1.05631	0.792649	0.913422	1.19018	0.922998	0.697832	1.04957	1.15191	1.22823	1.25738	1.19653	0.708903	1.102	1.09189	0.942948	1.09852	1.34748	1.41391	1.08069	1.01556	1.23965	0.746544	1.10181	0.83658	0.995782	0.780829	0.872014	0.945011	0.950299	1.06041	1.52716	0.705332	1.0954	0.978095
432	chr2	14533356	15114507	1.09922	1.30478	0.848708	0.951611	0.716115	0.933805	0.756444	0.75859	0.873692	0.638132	1.63131	1.50716	0.807329	1.1745	1.47063	1.08703	1.02766	1.30556	0.875091	1.15682	1.25892	1.44201	1.09811	1.17916	1.00377	1.12948	1.13982	0.793577	0.789763	1.27503	1.04886	1.37932	1.04933	1.55227	1.59091	0.889315	1.24164	0.988982	1.41792	0.994379	1.22411	1.06195	0.960426	0.952474	0.825329	1.16289
433	chr2	15114508	15718462	0.917705	1.75745	1.02476	1.12285	1.18997	1.02097	1.04242	1.26494	1.1057	0.831181	1.33669	0.967676	0.745383	1.0103	1.19856	1.25372	0.649191	0.996356	1.00068	1.06699	1.0719	1.48596	0.918616	1.21355	1.36373	0.968479	1.10673	1.13706	0.740228	1.33258	1.15205	0.992198	1.08187	0.849839	1.13123	0.903996	1.07526	0.82416	1.12501	0.891963	0.850469	1.10445	0.941512	1.02041	1.20213	0.975569
434	chr2	15718463	16266132	1.31219	1.84938	1.16836	1.0386	1.06601	1.27571	0.849189	0.978159	1.13089	1.16094	1.39542	0.941484	1.12979	1.22853	1.48233	0.900029	1.25421	0.731577	0.959257	1.61458	1.14948	1.6947	1.30665	0.700346	1.06111	0.97772	0.827727	1.20331	0.986531	1.35226	1.05602	1.48818	0.968107	0.740876	1.11681	0.8462	0.983623	1.19458	1.16097	1.23102	1.05086	1.17364	1.40355	0.967029	1.01236	1.1358
435	chr2	16266133	16886870	1.26506	1.54115	1.46367	1.06695	0.811635	1.0567	1.16885	0.803714	1.02077	1.22707	0.939117	1.01668	1.10766	0.999958	0.383806	1.17024	1.03355	0.728574	1.39567	1.03544	1.15797	1.10852	0.846602	0.778849	1.26311	1.24758	1.24069	1.18941	1.11167	0.809865	1.12328	0.776473	1.27115	1.06213	1.27878	1.46383	0.910256	1.02914	0.934424	0.983332	0.697931	1.17667	1.06392	1.43413	0.936741	0.963344
436	chr2	16886871	17478741	1.15256	1.37371	1.1872	1.37906	0.63601	1.14537	0.93794	1.12497	1.06952	0.769386	0.906024	0.955633	1.08917	1.07487	1.02156	0.843769	1.09014	1.31816	0.920616	1.04286	0.925612	1.62404	0.856131	1.22715	0.972538	0.809993	0.811287	1.12607	1.01989	0.523521	1.04164	0.848267	1.24885	1.18961	1.11067	0.643219	0.958936	1.00559	1.18438	1.44014	0.950243	1.63638	1.32867	1.18729	1.06249	0.903448
437	chr2	17478742	18071058	1.29041	1.596	1.0318	1.13638	0.924153	0.828281	1.04857	0.710452	1.16419	0.931389	1.03629	0.844023	0.839322	1.14082	0.850023	1.02359	0.884045	1.55884	1.07275	0.983293	1.08917	1.06103	1.14635	0.892242	0.853411	0.934661	1.00644	0.998891	0.928553	1.09241	1.21937	0.979571	1.12844	0.717791	1.14941	1.20009	1.10396	1.30015	0.933223	1.34263	1.10792	1.27589	1.22512	0.764453	0.99955	1.27141
438	chr2	18071059	18637274	1.05109	1.48799	0.865562	0.843112	0.944211	1.52077	1.54438	0.885257	0.968203	0.895795	1.23878	0.643164	1.10512	0.885237	1.15385	1.30814	0.999589	1.02639	0.972211	0.907508	1.07295	1.42746	1.104	1.02796	0.847319	1.12915	0.948154	0.675984	0.886944	1.02574	0.787515	0.76278	0.847273	0.683266	1.39166	1.08309	1.31102	1.40861	0.767272	0.892845	1.23016	0.993048	1.00691	0.766612	1.12119	1.23179
439	chr2	18637275	19207449	0.942853	1.26339	0.96777	1.0264	1.11302	1.23749	1.38038	1.10548	0.536795	1.12258	1.14676	0.784088	0.99522	0.77408	1.09137	1.44814	1.30746	0.99058	0.955086	0.988554	0.93251	0.962488	0.453924	1.33067	1.0181	0.826094	1.49431	0.916441	0.912741	0.764722	0.997539	0.989319	0.740796	0.85081	0.562293	1.58829	1.0205	1.50138	0.842361	0.862659	0.944273	1.08762	0.742295	1.01142	1.01815	0.854246
440	chr2	19207450	19763965	1.08767	1.51088	0.771597	1.04929	1.1403	0.98463	1.25306	1.08689	1.0027	0.859253	1.17291	0.836313	1.02769	0.789376	0.844124	1.33886	0.853923	0.702446	1.35488	1.03787	0.826221	1.17109	1.06317	0.544151	1.11055	0.866815	0.769381	1.15512	1.25841	0.925964	0.990255	1.21359	1.05663	0.898665	0.903812	1.38778	0.731438	1.16975	0.910372	0.922123	0.722509	0.874708	1.10386	1.31382	1.01258	0.862699
441	chr2	19763966	20303189	0.829542	1.20252	1.17177	0.800073	0.714345	1.15234	1.09486	0.872983	0.837439	0.982036	1.09086	0.988383	0.699432	0.966934	1.32224	1.04569	0.906817	0.992196	1.15091	1.11273	0.799568	1.10606	1.0128	0.716679	0.831957	1.05389	0.708077	1.19488	0.821432	1.03763	0.722276	0.77593	1.00361	0.831589	0.861348	0.893964	0.551886	1.36593	0.916612	1.43312	1.15269	1.04294	1.03008	1.12698	1.02973	0.915541
442	chr2	20303190	20818382	1.12088	1.31936	1.13746	1.30975	1.15835	0.783224	1.14763	0.905025	0.7971	0.958456	0.634137	0.96884	0.394655	1.20338	1.24205	1.09409	1.12183	0.887356	1.04989	0.84207	0.945566	0.598781	1.23838	1.21011	1.02891	1.15032	0.853771	0.850791	1.08242	0.99561	1.0436	0.633264	0.787723	0.871366	0.846448	0.850595	1.34166	1.29774	0.914015	1.3337	1.28803	1.15389	0.822775	0.811341	1.16246	0.999403
443	chr2	20818383	21397363	0.962186	1.11771	0.961304	0.984446	0.912054	0.888945	1.1129	1.26089	1.3621	0.985752	1.08865	0.779705	1.04484	1.12989	0.716101	0.761929	1.79537	1.27391	0.832201	1.19268	0.946679	1.14472	1.16854	0.743102	0.974731	0.914616	0.930524	0.916372	0.93947	0.891937	1.14348	1.09651	0.897545	0.798871	1.31321	1.28195	0.899372	1.39179	1.45561	1.00367	1.15593	0.915571	0.662956	1.20748	1.09258	1.19006
444	chr2	21397364	21992730	1.42618	1.42122	1.07138	1.08184	1.05805	1.0226	1.55456	1.15919	1.07831	0.962254	1.06782	1.48973	0.837989	0.996521	1.39137	0.78116	1.13707	1.11804	0.886059	1.26962	0.926493	0.872936	0.996264	0.892854	0.97573	0.921729	1.35905	1.16413	1.08569	1.13489	1.23193	1.37754	1.00458	1.17831	1.0836	1.10902	1.04368	1.46771	0.791255	1.08597	1.07943	1.03991	0.975082	0.890714	0.851938	1.02318
445	chr2	21992731	22606020	0.945231	2.00736	1.20016	0.875243	0.973163	0.975174	0.703692	1.84323	1.35453	0.873528	1.00822	1.44894	0.800728	0.884307	1.11821	0.8851	1.02297	1.33568	0.927612	0.800685	1.20147	1.20933	1.27471	1.01574	1.02697	0.948306	1.06703	1.86358	0.893182	1.36379	0.963107	0.860175	0.894245	0.865494	1.1777	0.839955	1.003	1.7054	1.14868	0.839839	0.788221	1.42152	1.15098	1.20995	0.974105	1.04726
446	chr2	22606021	23204886	0.968133	0.928082	1.3767	1.15222	0.814184	1.20125	0.93874	1.49303	1.60094	1.20324	0.725094	1.31059	1.03896	1.11597	0.624635	0.836023	0.907257	1.23437	1.05219	0.668104	1.20692	1.45625	1.03079	1.15044	1.22565	1.1475	0.959239	1.60255	1.04889	1.11156	1.00073	1.01394	1.11261	1.21469	0.657727	0.797511	1.19915	1.30636	0.768038	1.14669	1.18892	1.00009	0.972002	1.12545	1.13644	0.808387
447	chr2	23204887	23739795	1.2485	1.55881	0.756122	1.40534	0.88522	1.03823	0.907989	0.85389	0.958866	0.988748	1.10767	1.36074	1.25896	0.918782	1.50776	0.900784	1.16401	1.07878	1.08973	0.737002	0.947879	1.21097	1.20552	0.677981	1.23256	1.04739	1.1411	0.806539	1.06172	1.02661	1.17452	1.1065	1.08132	1.22849	1.04315	1.40035	1.12935	1.07124	1.22134	0.931185	0.845469	1.24082	1.26665	1.1326	1.03102	1.01196
448	chr2	23739796	24307720	0.740431	1.13591	1.26788	1.02807	0.965267	1.15066	0.998373	0.858375	1.52494	0.896527	0.917912	0.886955	0.888876	1.14951	1.59076	1.18755	0.937753	0.959227	1.18112	0.923387	0.949802	1.42188	1.2819	0.886162	0.577864	0.981784	0.969293	0.993776	0.87347	1.21383	0.890514	1.48446	0.914471	1.4264	1.05365	1.25011	0.834309	0.646274	1.08423	1.22632	1.01659	1.07936	1.25288	1.1137	0.900674	0.811382
449	chr2	24307721	24887019	0.878061	1.28545	0.865974	0.863344	0.908903	0.858336	1.21292	0.836111	1.3762	0.770026	0.946771	1.39621	0.799277	1.2799	1.0076	1.1926	0.99045	1.03886	0.892308	1.17835	0.936506	1.40615	0.789843	0.750916	0.799795	1.0321	1.01888	0.855795	0.758386	1.15252	1.04391	0.958235	1.15932	0.931493	1.15583	0.952722	0.956567	1.30379	1.01529	1.03723	1.02093	0.907993	1.011	0.823528	1.07859	1.02742
450	chr2	24887020	25449427	1.12785	1.8866	1.20006	0.847212	0.658376	1.36197	1.2614	1.47655	1.18425	1.00878	1.41834	0.866458	0.996094	1.28605	0.945564	1.0277	0.854296	1.12892	0.881125	1.14718	0.884317	1.28049	1.22189	0.635021	0.845086	1.03929	0.981152	1.69742	0.98445	1.10741	1.21779	0.779549	0.778292	0.914946	0.90792	0.943349	0.836163	0.875395	1.05932	1.11572	0.84449	0.990124	1.4022	1.01966	0.894068	0.707001
451	chr2	25449428	26000393	1.09897	1.29557	1.13322	1.12184	0.863861	1.03309	1.37601	1.032	1.30363	1.17035	0.879243	0.892212	1.3749	0.872875	1.09808	1.15293	1.11331	1.02219	0.822501	1.2014	1.07763	1.11741	0.758913	1.35977	0.887054	1.0842	0.997579	0.865942	1.14096	1.40555	0.995226	0.687028	0.979185	0.910081	1.58607	0.969482	1.2147	1.00777	0.90306	1.14027	0.657952	0.716378	0.781639	0.886463	0.748627	1.02914
452	chr2	26000394	26577169	1.06154	1.46008	1.04142	0.750332	0.838689	1.24237	0.927807	1.30293	0.842751	1.10837	1.27873	0.715818	1.02579	1.18386	0.544666	0.859118	0.921741	1.26853	0.924706	1.52633	1.11507	1.31366	0.878028	0.769215	0.910767	0.985834	0.936891	1.07361	0.831055	0.629594	1.23758	1.03112	1.25434	1.10296	0.758354	1.60781	1.236	1.01818	1.29936	0.698044	0.858305	0.802482	1.30092	0.906826	1.02897	0.952556
453	chr2	26577170	27100948	0.921254	1.54364	1.24758	1.00157	0.920369	0.899658	1.0795	1.07153	1.46304	1.20663	1.10197	0.723226	1.05962	0.957009	0.408111	1.06912	1.51107	1.04801	0.570984	0.891798	0.964786	1.06569	0.873319	0.858495	0.597706	1.03105	0.954507	1.21444	1.18807	0.562556	0.878579	1.19436	0.867943	0.713361	1.13097	0.916325	0.659343	0.876591	1.20248	0.948661	0.768184	0.985796	1.2383	0.965636	0.944874	0.78508
454	chr2	27100949	27663459	0.79484	1.53109	0.982975	1.21448	0.950712	1.19687	1.00688	1.63543	1.07219	0.839981	1.10783	0.894381	0.719843	0.534859	0.586036	1.16507	1.36333	1.11321	1.1477	0.96806	0.916414	1.1103	0.637075	1.1561	1.10625	0.909327	1.12796	0.78952	0.920677	1.23961	0.841116	1.04006	1.02531	1.48283	0.962859	1.06206	1.22136	0.978611	0.881015	1.04049	1.0379	0.894822	0.967753	0.746076	0.897336	0.948488
455	chr2	27663460	28239818	0.736577	1.07604	1.24182	1.18275	0.841984	1.14026	1.19792	1.41302	1.20059	1.0486	0.825395	1.05117	1.53624	0.911225	0.811898	0.849929	0.808053	0.70892	1.07425	0.672332	1.03914	1.06428	0.621671	0.799785	1.01027	0.914874	0.735634	1.61218	0.974203	0.924236	1.03044	1.25691	0.827741	1.23561	1.13909	1.36782	0.95629	1.09939	1.13492	0.784841	1.12246	1.06535	1.35023	0.861858	1.23589	1.08775
456	chr2	28239819	28771162	0.945674	1.21386	0.953744	0.775089	1.09952	0.945755	0.889489	0.863499	0.743395	0.94302	1.03833	0.924807	1.09805	0.884593	1.52943	0.769644	1.31019	1.19847	1.04153	1.07684	1.04804	1.24046	0.875873	1.15328	0.998627	1.14903	0.842173	1.20676	1.17811	0.898555	1.12797	1.28392	1.03521	0.963601	1.17148	1.54264	1.04755	1.04077	0.987377	0.722961	0.726005	1.27704	1.20407	1.02152	1.20283	0.664747
457	chr2	28771163	29307027	1.26426	1.07276	1.04119	1.15245	1.30916	0.869049	1.13566	1.36464	0.888263	1.06709	0.911952	0.925743	0.684031	0.962929	0.935684	1.39367	1.15601	0.691464	0.883652	0.774169	1.09419	1.31896	0.995925	0.917648	0.951274	1.02678	0.564076	1.14051	0.863584	1.45291	1.15813	1.084	1.17764	0.72017	1.01566	0.876557	0.956293	0.668342	0.901855	0.95088	0.822291	1.22199	1.36327	0.888097	0.768184	0.945405
458	chr2	29307028	29816036	1.0028	1.03498	0.384986	1.49018	1.13321	0.911944	0.96225	1.13064	0.924883	0.782249	0.596305	1.10899	1.44674	0.965918	1.17868	0.634369	0.894511	0.879053	1.4527	1.08216	1.16381	1.039	0.776092	0.598389	1.14374	1.08163	0.684754	0.932188	0.777338	0.980582	0.934594	1.27581	0.956193	1.2459	1.04364	0.756637	1.21356	1.32091	0.933068	0.930294	0.878241	0.859471	0.844068	1.42096	0.798679	1.16929
459	chr2	29816037	30341973	0.779015	0.975688	1.21095	1.52989	0.7454	1.12418	1.05992	1.0501	1.10552	0.865168	0.870333	1.04714	1.62528	0.762211	0.826617	1.37804	0.988294	0.957548	1.05564	0.710925	0.896376	0.74912	1.15247	1.23095	1.17065	0.934911	1.1102	1.09729	0.971833	1.08734	1.2474	0.849253	1.03248	1.10512	0.980768	1.023	0.847387	1.32202	0.983735	0.902595	0.825661	0.969454	1.09516	0.894145	1.0402	1.04281
460	chr2	30341974	30864415	0.930605	1.78352	0.839395	1.09594	1.01615	1.05899	1.39134	1.4258	1.3178	1.12179	0.972145	0.7771	1.10433	0.986017	0.990114	1.25496	1.07928	0.731745	1.33158	0.681074	0.896671	1.34277	1.15982	0.691774	1.17701	1.08102	0.767823	1.14901	1.08829	1.38442	1.08642	0.911747	0.866659	0.48826	1.35403	1.01664	1.09423	0.701983	1.3792	0.872015	0.885239	1.14947	1.56027	1.23163	1.02295	0.703285
461	chr2	30864416	31383531	0.834275	1.08683	0.903518	1.05482	1.01775	0.986804	1.17172	1.17954	0.923859	0.932166	0.914602	0.785574	0.736089	1.08347	1.27627	1.5543	1.51833	1.12518	0.929069	0.886658	1.1004	0.878797	1.00036	1.26769	0.973039	1.14143	1.17108	0.943682	1.02479	1.40853	1.03139	1.08626	0.869624	1.13833	1.09005	1.48349	0.897911	0.68206	0.971808	1.09392	1.24304	0.840658	1.32505	1.18137	0.771205	1.21306
462	chr2	31383532	31935767	0.849048	1.26082	0.955832	1.01119	1.14598	1.00322	1.13688	0.993136	0.976477	1.08258	1.08917	1.23062	1.1472	0.807245	1.14603	1.20157	1.19331	1.38015	1.0761	1.02736	1.14392	1.10283	1.12793	0.524335	0.824883	1.08629	0.99281	1.04637	1.0959	0.707996	0.876025	0.920455	1.0477	1.1058	1.48239	1.28054	0.897686	1.01818	1.05547	1.40864	0.99855	0.916644	1.22731	0.926774	1.09062	0.781025
463	chr2	31935768	32597270	0.970195	1.03608	1.29971	1.44545	1.09816	0.972577	1.17906	1.25858	1.12629	0.869811	1.08015	0.803303	1.31045	0.819111	0.964849	0.843038	1.589	1.34499	1.10707	1.14645	0.911326	1.74444	1.35167	1.38458	1.38515	1.06272	1.01941	1.19666	1.10257	1.50759	1.03529	0.822686	0.974965	1.27819	0.947351	0.789616	1.01625	0.956793	0.71986	1.22551	1.14535	1.55134	1.0136	0.908708	0.847842	1.15936
464	chr2	32597271	33198565	1.09677	1.30682	0.532858	1.20706	1.10016	1.02097	1.50971	1.45656	1.28998	0.767241	0.732005	1.02634	1.1003	1.19972	0.783672	0.933017	0.735733	0.996373	0.636789	1.71362	1.02868	1.39108	0.58791	0.80903	1.09099	1.10768	0.853769	0.589574	0.70229	0.888368	1.08558	1.22369	1.49295	0.637362	1.35015	0.817873	1.39491	0.94535	1.09543	0.760788	0.944959	1.04629	0.971859	0.977885	0.994856	1.08516
465	chr2	33198566	33738047	1.27785	1.48772	0.828125	0.839068	0.905014	0.807589	1.00448	0.98587	1.32282	0.670922	0.716741	1.03744	0.760741	0.923155	1.32351	0.874251	0.735064	1.16517	0.861171	0.82741	1.00479	1.07099	1.32112	0.778938	0.830006	1.11284	0.668135	1.24401	0.906629	0.889214	0.984925	1.02559	1.10689	1.17765	0.911216	0.992489	1.10073	0.79666	1.00756	0.873847	1.23709	0.908731	0.764199	0.999281	0.970031	1.03629
466	chr2	33738048	34329598	1.00025	1.45779	0.808981	1.30146	1.1535	0.897059	0.652146	0.958092	1.64958	1.21957	0.897581	1.07549	1.01577	1.08408	1.03263	1.25234	1.19256	1.45202	0.872921	1.00868	0.903404	1.63959	0.755821	1.42219	1.24391	1.09088	1.28479	1.78633	1.06815	0.919166	1.21242	1.22428	1.2379	0.842645	1.18328	0.994999	1.18825	1.51817	0.945765	0.852531	1.0402	0.845043	0.913986	0.902679	1.11162	1.01196
467	chr2	34329599	34969115	1.34832	1.47481	1.07728	1.08995	1.09165	1.17958	0.767508	1.38646	1.86022	0.990271	1.58706	0.810249	0.991874	0.675903	1.24349	1.1527	1.25695	1.09906	1.09493	1.0338	1.07648	0.894947	1.08064	0.750198	1.03486	1.16668	1.61228	1.85281	1.01215	0.742069	0.796468	1.25417	1.2234	1.32725	1.8121	0.93844	0.962125	1.255	1.09361	0.811153	0.91508	1.04858	1.32631	1.04618	1.01596	1.14979
468	chr2	34969116	35642877	1.02592	1.56486	0.667085	1.37451	0.835794	0.890062	1.17921	1.40767	1.35244	0.996197	0.860513	1.04053	1.14039	1.31865	0.667003	0.765621	1.20694	1.26161	1.39793	1.0087	1.05104	0.963459	1.09433	1.26383	0.855	1.01333	1.09954	1.22041	0.751341	1.43096	1.10248	1.23704	1.40041	1.19622	1.1644	0.925467	0.967878	1.23557	0.928596	1.07594	0.412399	0.936599	0.760942	0.839596	0.677524	0.97434
469	chr2	35642878	36301261	1.08959	1.4529	1.14587	0.863252	1.0156	1.47063	1.22029	1.51884	1.41076	1.11777	1.19037	1.12672	0.745739	1.09032	1.02067	1.01093	1.14084	1.36606	1.2522	1.0508	1.0202	0.948932	0.909276	0.742952	1.10411	1.28385	0.915322	0.95601	1.00242	1.48849	1.28089	0.974535	0.775208	1.08411	0.947814	1.36223	0.978072	0.990299	0.965326	0.998005	1.13766	1.32283	1.17609	1.0215	0.955116	1.09384
470	chr2	36301262	36879041	1.07357	1.17226	1.19443	1.15208	1.10139	1.10797	0.574716	1.00018	1.24471	0.767748	0.857837	1.14061	1.10449	1.24332	1.10752	1.19233	0.99904	0.894317	0.789723	0.90722	0.960342	1.01464	1.17736	1.02782	1.02908	0.88598	0.948217	0.929084	1.11424	0.713182	0.765201	1.19348	0.933677	0.76817	1.09816	1.12546	1.04847	1.21401	0.870927	1.18155	0.788419	1.45942	1.21975	1.25611	1.20397	0.912441
471	chr2	36879042	37431136	1.28687	0.985545	1.34846	1.53391	0.972853	1.02416	0.837556	1.06946	1.16638	0.724328	0.937144	0.832831	0.799465	1.0489	0.978077	1.14928	0.86116	1.14797	0.816265	1.03911	1.00128	1.27069	1.29611	0.575115	0.895834	0.969788	0.923731	0.691137	0.741242	1.30182	1.01204	1.11633	1.1645	0.923215	1.31938	0.78	0.832459	0.942692	0.809928	0.977346	0.872915	1.02252	1.00256	0.952207	0.872406	1.13215
472	chr2	37431137	37979780	1.00069	1.37149	0.729091	1.01804	1.06256	0.765388	1.19484	1.30343	1.37527	0.751753	1.34547	1.58085	0.736511	0.870979	0.843844	1.10121	0.895742	1.07902	0.903636	1.04232	0.937887	1.4826	0.8298	1.18261	1.03821	0.949273	0.930379	0.977759	0.93389	0.458583	0.967517	0.761172	1.21814	0.927832	1.47241	0.995119	0.811804	1.19251	1.15447	0.984708	0.882643	1.16579	0.880401	1.28188	0.880259	0.835969
473	chr2	37979781	38517812	0.98676	1.19889	0.689751	1.01484	0.905397	0.853178	0.773596	1.12019	1.10862	0.922859	1.28733	0.830871	0.778424	1.25702	0.473279	0.887724	0.731948	0.861827	0.857549	0.959237	0.861638	1.26834	0.906767	0.998834	1.12388	0.985892	0.905278	0.885791	1.04353	0.899912	0.935587	0.812105	1.14279	0.959514	0.933323	1.38493	0.717343	1.04032	0.94757	1.20971	0.98017	0.768253	1.3235	1.08586	1.07146	1.05356
474	chr2	38517813	39087244	0.876543	0.896737	1.47173	0.979521	1.04543	0.904666	0.788528	0.513752	1.11738	0.814871	0.954661	1.42427	1.29245	0.86124	1.12776	1.01846	1.31563	1.23556	0.839843	1.1147	1.01647	1.17744	1.01483	1.21825	0.990073	1.05359	0.904495	1.15162	0.945498	1.13207	0.917875	1.16268	1.09142	1.01569	1.17334	1.12013	0.891547	1.4578	0.871146	0.690485	0.75862	1.19387	0.970451	0.794552	1.09702	0.890419
475	chr2	39087245	39678823	0.891493	1.28819	1.42849	1.3316	1.1905	0.980268	0.939957	1.19658	1.1236	0.801782	1.00303	1.37335	0.802955	1.10042	0.98772	0.931209	1.17922	1.05025	0.977437	0.952274	0.875045	1.09107	0.664042	0.738961	0.762318	1.08323	1.09984	1.12244	0.814436	0.829263	1.01402	1.00746	0.920992	1.43037	1.36369	1.1938	1.44928	0.793959	1.05548	1.11197	0.894561	0.750778	0.97462	1.03904	0.851768	0.936987
476	chr2	39678824	40223561	0.799391	0.575965	0.850967	0.906834	1.04581	0.83163	0.683644	0.926758	1.41563	0.852676	0.939033	1.22553	0.951862	0.894976	1.22036	0.685444	1.15094	1.20948	0.963092	1.06935	0.878087	1.10589	0.91032	0.966873	1.0741	1.09324	0.898755	0.725749	0.686743	1.01652	0.945718	0.970327	1.37828	1.1478	0.576174	1.1264	1.25314	1.22045	1.03273	0.741306	0.566201	0.991022	0.97841	1.01291	0.926355	0.996609
477	chr2	40223562	40783523	1.27904	1.02066	0.827959	1.01823	1.17067	1.12261	0.904479	1.02405	1.33376	1.52468	0.917198	0.931269	0.870181	1.38471	0.983531	0.838455	0.908961	1.0969	1.05544	1.03562	1.07073	0.985502	1.43891	1.03403	1.25689	1.29661	0.900851	0.658384	0.976372	1.23753	0.917162	1.11803	0.90722	1.34373	1.10472	1.43499	1.09006	1.26833	1.00315	1.0722	0.830081	1.28665	0.768251	1.1888	1.11689	1.04923
478	chr2	40783524	41400376	1.16546	1.16429	1.16462	1.083	0.865717	0.997644	0.621635	1.30224	0.85482	0.964838	1.09738	0.719604	1.18535	0.849109	1.04533	1.19367	1.15988	0.681722	1.1118	1.10726	1.01069	1.40753	0.970988	0.842906	1.20252	1.02471	1.10612	0.604088	0.948736	0.781523	0.960609	0.784562	1.05026	1.02475	0.973678	0.649458	0.953979	0.930993	1.00328	1.2923	0.734391	0.901726	1.21709	1.32429	1.03939	1.03545
479	chr2	41400377	42006964	1.13001	1.28091	1.03128	0.802873	0.884343	1.18197	0.971248	0.982367	1.31945	1.20873	1.09904	1.08086	1.40659	1.26387	1.07362	1.21713	1.42996	0.871084	1.09712	1.3279	0.906395	1.45609	0.949552	0.755112	1.042	0.968601	1.04323	0.97224	1.16346	1.01465	0.931256	0.811561	1.04067	1.62114	1.51578	0.968778	1.42284	1.39423	0.979716	0.93663	1.031	1.0524	1.2306	1.09111	0.979459	0.81195
480	chr2	42006965	42563140	0.86037	1.33891	1.19733	1.253	0.784675	1.14687	1.18302	1.09899	1.14357	1.03848	1.18256	0.966703	0.892041	1.4334	0.594582	1.38603	0.964105	1.29425	1.30706	1.27719	0.894928	1.63411	1.19033	1.18776	1.02083	1.08858	1.26203	0.831312	1.20257	0.977618	0.818507	1.03061	1.07878	1.57774	0.887623	1.24634	1.20633	1.11161	1.20735	1.1768	1.09533	1.14689	1.25516	1.01674	0.859046	0.804917
481	chr2	42563141	43142304	1.10388	1.50486	1.23876	0.873162	0.760765	0.846219	0.873906	0.929743	1.05914	1.08702	0.756992	1.35316	1.04025	0.935349	0.854364	1.05151	0.947654	1.08397	0.937718	0.859377	0.862617	1.58597	1.16182	1.00352	0.647754	1.02457	1.33263	0.982406	0.898218	0.736986	0.824677	1.06828	0.792049	1.03167	0.688451	1.03111	1.03541	1.39864	1.08907	1.09479	1.17016	1.09208	1.38564	0.801573	0.844132	0.94259
482	chr2	43142305	43662661	1.20617	1.32293	0.903062	0.93778	0.929856	1.39144	1.04582	1.05856	0.753111	1.08127	0.800058	0.727856	1.28461	0.96277	0.902338	1.21436	1.51228	1.2347	1.16332	0.916816	0.701225	1.02298	1.20251	1.27662	1.04141	1.25156	1.16922	0.949678	0.988077	1.06124	0.855716	1.25257	0.948659	0.94165	1.06842	1.26972	0.682178	0.973045	0.977181	0.917272	0.871198	0.748967	1.04781	0.635143	0.934628	0.998088
483	chr2	43662662	44246905	1.25538	1.62051	1.05541	0.644327	1.16488	1.04248	0.575961	1.29383	1.42633	0.893923	0.926161	0.854948	1.09191	0.776867	0.598013	1.31894	1.20292	1.10199	1.11819	1.03026	0.906092	1.19438	0.659652	1.11806	1.033	1.11404	0.822875	0.921235	1.15046	0.705707	0.884161	1.0203	1.18161	1.05299	0.942773	1.14923	0.867988	0.990488	1.33985	1.1261	1.25688	0.80678	0.963969	0.720622	0.929795	0.871762
484	chr2	44246906	44840512	1.18083	1.0241	1.26313	0.818383	0.970309	0.960079	1.48045	1.15169	0.872691	0.883328	0.830504	1.36276	0.705344	0.783938	1.44568	1.03341	1.03023	1.10587	0.99691	1.11517	0.945431	0.632107	1.38405	1.071	1.13479	0.897643	1.02145	1.06061	1.27261	1.09036	1.04446	0.794857	0.859622	1.73653	1.37376	0.995638	1.39398	1.13414	1.01402	0.715347	0.945902	1.45837	0.840452	0.949903	0.961069	0.923959
485	chr2	44840513	45394967	0.850171	1.08699	1.17105	0.978615	1.1009	0.714148	1.0629	0.866054	1.25929	1.24443	1.14147	1.0841	0.878845	0.865139	1.08736	1.10643	0.744301	1.26679	1.11032	1.23702	0.923116	1.07535	1.06759	0.993334	1.00023	0.945227	1.00282	1.252	0.787449	0.629291	0.971234	0.819036	0.95025	0.505133	0.643511	1.15355	1.01498	0.855304	0.787854	1.04567	0.760247	0.861592	0.896793	1.15696	1.60935	0.963384
486	chr2	45394968	45955197	1.07004	1.59709	1.18924	1.16344	1.06302	1.23475	0.941804	1.3716	1.26513	0.830734	1.41049	0.937385	1.08988	1.18002	1.1249	0.733968	0.978919	1.14883	0.935958	1.03986	1.13319	1.7627	0.853664	1.43771	1.03164	0.886109	0.563098	1.06938	1.00128	0.971315	1.08578	1.12834	0.791909	1.12157	0.752184	1.06649	1.18796	1.07492	1.02095	0.956663	0.926073	1.01624	1.12852	0.986856	0.996002	0.881259
487	chr2	45955198	46454667	0.870117	1.40987	1.41896	0.992087	1.08071	1.056	0.594012	1.25628	1.10532	0.986666	0.896915	1.00115	1.07587	1.2865	1.35695	0.720859	0.674602	1.11453	1.03082	0.764601	1.09539	1.28055	0.853508	0.937698	1.20245	1.16564	0.976373	1.118	0.917774	0.972688	1.16211	1.03371	0.815099	0.893872	1.45968	1.4504	0.878464	0.649976	0.980649	0.793947	0.812756	0.856299	0.883855	1.2646	0.948454	1.03473
488	chr2	46454668	46973302	1.3542	1.56358	0.945379	0.73612	0.672201	1.01311	0.814911	1.04765	1.06722	1.20703	1.20969	0.979381	0.905334	0.831658	1.0236	1.03552	1.31209	1.21727	1.2443	0.837388	1.16802	1.12386	0.811899	1.0805	0.758558	0.963303	0.82539	1.0587	0.654927	0.660073	0.914559	1.38092	0.849308	0.926373	0.904031	1.01887	0.910557	0.913931	0.720891	1.23021	1.37545	0.592343	0.98807	0.954514	0.807045	0.925298
489	chr2	46973303	47483487	1.06909	0.744702	0.483784	1.01308	0.83315	1.08302	0.974026	0.451255	1.24321	0.99339	0.627494	0.929355	1.22628	0.709204	1.47974	1.08862	1.06775	1.187	0.895065	0.704793	0.999858	0.977074	1.08042	1.00857	0.966781	0.988392	0.966695	1.17703	0.724727	1.19279	0.882876	0.795887	0.927554	0.769483	0.833032	0.889024	0.947377	0.84604	1.07874	0.962467	0.853073	1.05617	0.886715	1.04977	0.867395	1.1028
490	chr2	47483488	48046218	1.01859	1.43431	0.897059	0.930512	1.02698	1.01196	0.795161	0.761179	1.1535	1.35161	0.795965	1.39202	1.60039	1.0805	0.858404	1.00842	0.53595	0.894915	1.03653	1.02421	0.884424	1.07626	1.15641	1.01847	0.972409	0.946426	1.00708	0.928718	1.11751	1.50728	0.967485	1.26753	0.868891	1.12979	1.23709	0.884254	0.928151	1.06567	1.08814	1.16114	0.714164	0.904527	0.840227	1.31371	1.25989	0.993984
491	chr2	48046219	48650808	1.17954	1.1534	1.29942	1.07365	1.31021	1.005	0.831806	1.41927	0.963477	1.00536	0.831891	1.42761	0.843703	1.14587	0.65487	0.949195	0.98369	1.21072	1.0857	1.33148	0.894011	0.915538	0.638967	1.18716	1.1304	1.01538	0.736313	1.14681	0.970611	1.37033	0.922695	0.993145	1.1996	1.01401	1.04439	0.995338	0.841387	1.88206	1.0172	0.929713	1.54477	1.07871	1.31499	0.842174	1.06747	0.912963
492	chr2	48650809	49243614	0.90745	1.86615	0.575855	0.79319	1.31388	1.05946	0.768804	1.41077	1.18321	1.12265	1.09189	1.27889	1.46177	0.76014	1.07507	1.1138	0.887072	0.786755	1.36164	1.0775	1.15884	1.39481	1.59289	0.846908	1.06542	1.21864	1.17945	0.937645	1.09935	0.575084	0.896605	0.92715	0.880611	0.722729	0.89088	0.977923	0.833318	1.2662	0.954464	0.795866	1.30452	0.984798	1.09854	1.13477	0.971335	1.21908
493	chr2	49243615	49876102	1.1103	1.45541	0.995828	1.44361	0.861706	1.1848	0.86799	0.618808	1.06688	1.36336	1.16004	0.999023	1.24518	1.00159	1.37389	1.10022	0.792985	1.19408	0.981315	1.15372	0.973863	1.45517	1.0932	0.783326	1.1633	1.07991	1.25222	1.12644	1.23662	1.05791	1.2623	0.90586	0.999736	0.867938	1.14456	0.776153	1.15354	0.676986	1.16435	0.985487	0.707209	1.08021	1.26006	1.19131	1.07881	1.04245
494	chr2	49876103	50503028	1.35003	1.15805	0.920504	0.906961	0.840005	1.2688	1.16028	0.824632	1.1309	1.18656	1.38057	0.790139	1.17727	1.15486	1.21951	1.33135	1.29117	1.19592	1.07649	1.47802	0.796151	1.31569	1.52582	0.984187	1.14519	1.07347	0.910662	1.22156	0.949056	1.20303	1.01817	0.742332	0.897859	0.85997	1.24218	1.39967	1.2607	1.49065	1.23821	1.20178	1.25203	0.796436	0.933444	0.875768	1.21076	0.957087
495	chr2	50503029	51097943	0.854181	0.90756	0.922976	0.914734	0.745969	0.912906	0.558424	1.55503	1.40843	0.868983	1.19159	1.10105	0.881225	0.912536	1.14712	1.20913	0.983024	1.46268	1.48404	1.27027	1.00384	1.07064	1.0473	0.936128	1.28118	1.02311	0.945572	1.41351	0.746901	1.6881	1.10442	1.00468	1.13304	1.27583	1.07794	1.09045	1.35804	1.08459	0.978757	0.996761	1.25348	1.121	0.980028	1.25312	0.934846	0.913751
496	chr2	51097944	51727810	1.05183	0.898674	0.963969	1.03421	1.00015	0.8694	1.39512	1.04458	1.09282	1.06327	0.63923	1.31143	0.617115	0.941289	1.21444	1.09729	1.24126	1.34837	0.782345	0.971713	0.954941	1.55167	0.809779	1.06553	0.963333	0.940292	1.03843	0.66735	1.0948	1.10275	0.858393	0.946608	1.25023	0.617405	1.49952	1.26099	0.998104	1.14306	1.02827	0.864852	1.22113	0.90373	1.3436	0.962583	1.26673	0.808898
497	chr2	51727811	52410958	0.851191	0.84877	1.03267	1.10383	1.00409	1.30742	1.0581	0.961349	1.05246	1.03628	1.35833	0.95901	1.24343	1.22639	0.81393	0.69084	1.12003	1.06643	1.20274	0.727993	1.14421	1.34548	1.20213	0.773835	0.980052	1.03001	1.1102	1.09417	1.05816	1.10401	1.25291	0.972089	1.09878	1.14581	1.04915	1.3604	1.17723	1.40063	1.13414	0.932677	0.844266	0.926902	1.34018	0.843583	0.816259	1.06648
498	chr2	52410959	53047196	1.10713	1.17565	1.83177	0.83146	0.951643	1.00318	0.948599	1.27685	1.27066	1.02122	0.799599	0.973579	1.52407	1.27525	1.35097	0.680693	0.940874	1.35955	1.01352	0.930628	1.02807	1.21822	0.828401	1.13317	1.0326	1.02617	1.1266	0.835236	0.926227	1.1988	0.955133	0.965326	0.854983	1.60862	1.10659	1.13383	1.19288	1.24903	0.991284	1.08304	0.87069	0.773772	0.839769	1.00422	0.773759	0.867343
499	chr2	53047197	53670221	1.14329	1.27921	1.34924	1.16707	1.05201	1.21711	0.838726	1.17925	1.26145	1.2465	1.00602	0.772266	1.77987	1.0835	1.332	1.35732	1.10226	1.15914	0.933334	0.934382	1.33354	0.882992	1.20725	1.25565	1.08558	0.990596	0.927759	0.736524	1.1101	1.77665	1.0677	1.21219	1.05222	1.21717	1.03481	1.18753	0.771187	1.13522	1.26431	1.1985	0.905034	1.27564	1.14625	1.2787	1.05461	1.02857
500	chr2	53670222	54257737	1.11013	0.798325	1.33825	0.850375	1.09248	0.744038	1.14938	0.73503	0.958325	1.1083	1.20067	0.747076	1.27146	1.36435	1.31383	0.774398	1.45015	1.10699	0.903023	0.974984	0.982539	1.51756	1.2901	1.11815	0.89696	0.983015	0.705849	1.32442	0.896428	1.10971	0.979108	1.07352	1.10131	0.55393	1.26212	0.693422	0.992219	1.26993	1.00179	1.03077	1.41484	1.19519	1.13593	1.18346	0.821659	1.02843
501	chr2	54257738	54820139	0.677359	0.995363	1.29996	0.86117	1.19263	0.996545	0.693718	0.840027	0.868446	0.548394	1.11383	1.04184	1.67553	0.945439	0.827877	0.610354	1.1585	0.774234	0.737911	0.764288	1.04183	1.28588	0.750496	0.813249	1.23151	0.969958	0.987727	1.15346	0.780078	1.10863	0.94698	0.720238	0.913037	1.02466	1.75538	0.748867	0.871557	1.05898	1.14145	0.862038	1.26942	0.790132	0.830014	0.95146	0.742407	0.787667
502	chr2	54820140	55348994	0.960478	1.01937	1.34606	0.823369	1.0908	1.03618	0.522031	0.70522	1.07522	0.937278	1.24875	0.899294	0.791039	1.1142	1.22264	0.646757	1.29223	1.02125	0.994408	0.688833	1.09895	1.0497	1.41375	1.21229	0.93468	1.04593	1.00519	1.15952	1.11834	1.01337	0.810912	0.612658	1.0455	0.97831	1.33285	0.984814	0.769789	0.989503	1.05932	1.27905	0.888865	0.957152	0.854433	0.838619	1.02223	0.935561
503	chr2	55348995	55949084	0.844259	1.94063	0.807787	1.30213	1.08615	0.831877	1.30518	1.8389	0.824396	0.780389	1.0907	0.598505	0.839479	0.850813	1.08097	1.43409	1.2332	1.08224	1.08284	0.97504	0.964499	1.13456	1.40115	1.3586	1.03486	1.05487	0.932646	1.10638	1.10724	1.61228	0.92342	0.7609	0.703344	0.841752	0.644359	0.908359	0.898064	1.42131	0.87188	0.773471	0.914067	0.990548	1.23224	1.17427	1.15446	0.901969
504	chr2	55949085	56527410	1.10219	1.52683	1.1124	0.836658	0.936163	1.08543	0.686148	1.19835	1.37636	0.795796	0.836732	1.40208	0.900407	0.835332	0.641007	1.00814	1.35258	1.04775	1.0799	1.46715	1.16054	0.682586	1.09301	0.773169	1.06938	1.16693	0.539087	1.07516	1.09815	1.12904	1.11062	0.846614	1.16318	0.660962	1.10845	1.32855	1.48993	1.36679	1.3417	1.09569	0.937585	1.04591	1.15383	0.989569	0.82084	0.88201
505	chr2	56527411	57144947	0.919532	1.2727	0.741064	1.1007	1.26496	0.856943	1.46131	1.1996	0.999142	1.24308	1.24886	1.1778	0.881533	1.1284	1.06531	1.23225	1.10254	1.33526	0.758299	1.38648	1.07742	1.37938	1.0529	0.879484	1.19733	1.15494	1.12952	1.11115	0.784466	0.604545	1.02425	0.819461	0.973898	0.931979	1.14521	1.12732	0.842716	1.20184	1.15606	0.976679	0.817912	1.03622	1.40024	1.02095	1.01562	1.05661
506	chr2	57144948	57821570	1.18024	1.54114	1.04633	0.91071	1.08785	1.07976	1.33093	1.55387	1.70625	1.13266	1.65353	1.52443	1.31747	0.914185	1.03604	0.662509	0.844017	0.994967	1.1236	0.786112	1.17041	0.787846	1.05668	1.19121	1.21671	0.962289	1.02719	1.09655	1.11632	1.25245	0.856818	1.44539	1.43332	0.706419	1.00287	1.03385	0.590089	0.925087	0.965165	1.09412	1.08852	0.668175	0.857908	1.41138	1.09298	0.859268
507	chr2	57821571	58467234	0.800609	1.1136	0.809026	1.3777	0.855543	1.10347	0.943335	1.7161	0.69827	1.20172	1.49007	1.17684	0.921333	1.02371	1.10015	0.98366	1.1359	1.39418	0.903927	1.11955	1.21231	1.33074	0.79755	1.10118	0.970967	1.11999	0.875286	0.756068	1.34812	1.21221	1.07412	1.1479	0.894631	0.712884	1.1961	1.23838	0.791486	1.29139	1.02055	1.22002	0.605493	0.562815	0.788154	1.19395	0.892112	1.12868
508	chr2	58467235	59063278	0.953985	0.670932	0.977656	0.941837	0.906095	1.10375	1.02441	0.95558	1.11482	0.899211	1.24767	1.0478	1.04032	1.34479	1.36989	0.628077	0.930188	0.786796	0.685858	1.23289	0.97652	1.15721	1.04946	0.627261	0.907286	0.970523	0.808486	1.41204	1.0469	1.24744	0.900646	0.972292	1.05515	1.27574	1.16834	0.835157	0.987913	1.17378	1.03502	1.05497	1.0677	1.41396	1.10822	1.39825	0.575405	0.952027
509	chr2	59063279	59627318	1.69149	0.974646	1.4529	0.958024	0.833914	0.92948	1.04551	1.41577	1.23014	1.61121	1.00648	1.07819	0.690118	0.88861	1.51479	0.747967	1.68851	1.47469	1.34981	0.878785	1.08494	1.10468	1.13942	0.736645	0.836376	0.992646	1.04912	1.19042	1.06572	1.2744	1.19086	0.879706	1.25501	1.12886	1.17931	1.25424	0.696045	1.1441	0.925268	0.967037	1.45916	1.65654	0.793457	0.999899	0.953333	0.966279
510	chr2	59627319	60229212	1.13328	1.08492	2.12408	1.12298	1.21597	1.09703	0.776433	1.61857	1.3814	1.15535	1.20777	0.748256	0.985199	1.28261	1.55981	1.40543	1.70875	1.21497	1.10314	0.855225	1.22179	1.55046	0.817624	0.963094	1.17105	1.02762	0.964285	1.15364	0.933581	1.60108	1.3086	0.825639	1.08938	1.0062	1.28774	1.14103	1.09687	1.62136	1.40143	1.1378	1.24122	1.2746	1.10254	1.00906	0.974013	0.880038
511	chr2	60229213	60766385	1.09572	0.691085	0.874778	1.30114	0.985515	1.0343	0.677771	1.34381	1.09253	1.07067	1.1345	1.25766	1.40466	1.13429	0.695817	0.941592	1.11317	0.920069	0.68426	1.22532	1.07198	1.30065	1.07261	0.903997	0.867781	1.05545	0.915519	1.00351	0.669983	1.42045	1.17829	1.31479	1.05121	1.45606	1.2129	0.848822	1.0548	1.21758	1.28593	1.4802	1.1133	0.938026	0.791945	1.27241	1.05997	0.932206
512	chr2	60766386	61358979	1.04796	1.03123	1.40171	0.9793	0.935578	1.20894	1.18991	1.18363	1.42129	1.04739	0.924754	1.02178	1.10362	0.824384	0.525432	1.08444	1.06095	0.914133	0.888522	1.3089	0.969646	0.865661	0.892718	1.10436	1.25784	1.06748	1.14988	1.26281	1.03152	1.31304	1.11817	0.98157	0.956437	0.968517	1.202	0.925867	1.04455	0.966056	1.1991	0.892228	1.30844	0.858915	1.06523	1.24931	0.564858	0.899882
513	chr2	61358980	61947434	1.28006	1.6042	1.40183	1.35337	1.3557	1.22203	1.08909	0.741697	1.11233	1.108	0.665458	0.805044	1.37533	0.95208	1.39925	0.995822	1.44284	1.24617	1.00616	0.835378	0.986111	1.17802	1.22415	1.23048	1.13231	1.17987	1.20246	1.36797	1.02147	0.981467	1.24339	0.965942	1.21251	0.964545	0.636154	0.976083	1.1669	1.16117	0.986534	0.98171	0.82144	1.00879	1.04088	0.958235	1.02595	0.851634
514	chr2	61947435	62515784	1.01767	1.03419	1.00642	1.06604	1.01463	0.877571	0.902373	0.994375	1.40893	0.560961	1.31005	0.986126	0.995307	1.11443	0.988677	0.933473	1.38214	1.26395	0.898023	0.940332	1.10739	1.14421	0.926695	1.07801	0.995515	1.1204	1.18278	1.19478	1.08856	1.42669	0.805143	1.01856	1.01635	0.887052	1.05038	1.06055	1.126	1.49723	1.20952	0.735932	0.822964	1.2674	1.12684	1.01571	0.980023	1.11763
515	chr2	62515785	63091836	1.00622	1.37331	1.55111	0.96605	1.11344	1.27799	1.14845	0.705305	0.940583	0.904078	1.28467	0.509578	0.904503	0.840807	0.987602	1.11751	0.936897	1.0203	0.933783	1.31455	0.985552	1.08404	0.93013	1.30611	0.779044	1.10842	1.17398	1.11689	1.17762	0.969129	0.934735	0.884606	1.36471	0.933933	1.08107	0.899376	1.00686	1.39174	0.78291	1.0123	1.13372	0.748212	1.3725	1.09676	1.14977	1.07675
516	chr2	63091837	63702132	0.910571	0.850003	0.713957	1.12429	0.653081	1.22519	0.812706	0.919157	0.936415	0.962037	0.912543	0.877626	0.469401	1.20779	0.81355	1.02797	0.814993	1.18234	0.91376	1.00496	0.950781	0.882206	0.943951	1.08351	0.726655	0.969449	0.92822	0.878155	0.882311	0.580027	0.849103	1.28412	0.932838	0.696869	0.734615	0.914701	1.20309	1.37837	0.907059	0.58916	0.800886	0.905668	1.13834	0.998904	1.09175	1.01267
517	chr2	63702133	64314285	0.754242	0.771128	0.961277	0.786987	1.3552	0.8458	1.08824	0.88247	1.15036	1.03308	1.17112	1.07545	1.20863	1.01686	0.89732	0.777022	0.766939	0.975055	1.19022	0.747707	0.946088	1.02093	1.22292	1.19314	1.14685	1.16083	0.528001	0.68632	0.956091	1.36921	1.05842	0.927225	0.943518	0.85696	1.19643	0.77518	1.05325	1.08291	1.00401	1.05515	0.867984	1.09956	0.751827	1.10722	0.98788	0.983147
518	chr2	64314286	64864049	1.04987	1.12126	1.28701	0.837524	1.02906	1.45931	1.1006	0.725716	1.25326	0.754309	1.12226	1.08071	0.465642	1.04027	0.620789	0.967131	1.36306	1.01059	0.829772	0.834145	0.984692	1.16601	1.36094	1.04796	1.00872	1.12444	0.928449	1.17698	0.935973	0.972163	1.07541	0.647147	0.959894	1.10515	1.10939	0.794668	0.837565	1.55436	0.900622	1.21872	0.623966	1.12386	1.06937	1.12067	1.09027	0.802787
519	chr2	64864050	65392921	1.13233	1.32309	0.998022	0.721452	0.694904	0.736231	1.23704	0.868592	0.421357	1.00763	1.0095	0.995866	1.06242	0.634196	1.68348	1.1046	0.614477	0.734401	0.828998	1.00675	0.843082	1.04416	1.06889	0.865365	1.27505	0.926277	0.969212	0.671005	1.01801	1.52901	1.13441	0.960027	1.03805	1.24082	0.834173	1.11645	0.855698	0.922682	0.91263	1.10075	1.01721	0.921364	0.681423	0.5441	1.02898	0.941073
520	chr2	65392922	65965272	1.11996	1.07973	1.28403	0.846587	0.82614	1.25436	1.03098	1.0522	1.20188	1.32632	1.05156	0.985365	1.2896	0.772516	0.884015	1.08778	1.60889	1.01332	1.01965	0.879214	1.19059	1.07207	1.04728	0.976577	1.01978	1.0293	1.01108	1.55374	0.940705	1.4001	1.23045	1.16992	1.02112	1.33821	0.92718	1.15664	1.43202	1.38142	0.964488	1.01176	0.74753	0.592466	1.03138	0.866225	1.44628	0.899497
521	chr2	65965273	66529727	0.94973	1.21812	0.906398	1.33165	0.562247	1.02335	1.00637	1.07177	1.0038	1.22933	1.11586	1.19196	1.02128	1.07225	1.61334	0.842511	1.32758	0.944781	0.799088	0.764264	0.842687	1.16437	0.787061	1.32724	0.800842	0.975955	1.11559	1.3659	1.06745	1.19757	1.32801	0.927081	1.21499	0.60035	0.984231	1.25099	1.42523	1.08741	0.949147	0.865391	0.929225	1.25777	0.769918	0.799161	0.743568	0.995993
522	chr2	66529728	67114299	1.21538	1.02538	1.06065	1.25753	0.985822	0.856216	1.07549	0.793144	0.982127	0.952414	1.03012	1.30579	0.671031	1.00782	0.751224	1.1986	0.789937	0.97292	0.911922	0.816301	1.01084	1.2469	1.16277	0.977422	1.63222	0.827525	1.40763	1.58623	0.957981	1.12502	0.984404	0.839797	1.18188	0.89413	0.663064	1.22146	0.720929	1.27172	1.12189	0.921869	1.1019	1.26125	0.773633	0.861483	0.971856	0.716285
523	chr2	67114300	67686289	1.10895	0.848097	1.39591	1.02429	0.612194	1.0473	1.12803	1.24682	0.935662	0.7098	1.06767	1.04905	1.38204	0.879935	0.940724	0.912844	0.885332	0.940755	0.631616	1.02405	1.06365	1.16445	0.843179	1.08355	0.781557	0.8481	1.04819	1.33286	0.914297	1.1027	1.01306	0.885085	1.32357	1.07308	0.899891	0.47694	1.11338	0.786685	1.19364	1.2229	1.03708	1.01355	0.957273	0.778536	1.16808	0.823011
524	chr2	67686290	68214069	0.874175	1.02101	1.02588	0.755349	0.812169	1.27565	1.10852	1.47984	0.640588	0.671246	0.81483	1.09678	1.01437	0.839502	1.27829	0.961849	0.821487	1.16489	0.983924	0.922724	1.11749	0.949158	0.906053	0.988816	1.07602	0.914991	1.30448	1.07254	1.05784	1.06782	1.20635	0.820735	1.00239	1.01013	1.05216	1.65539	0.86936	1.07045	1.1408	1.38789	0.927939	1.05524	0.886821	1.62916	0.843627	1.07972
525	chr2	68214070	68818686	0.971474	0.893152	1.09765	0.89988	0.919814	1.13742	1.14517	1.13536	1.07195	1.07644	1.28578	1.0162	0.848863	0.842085	1.50028	1.01719	0.705099	0.836965	0.788215	0.814796	1.05354	0.810051	1.0901	1.00672	1.35809	1.09719	1.11519	0.876815	1.07162	1.12242	1.08084	1.10539	1.1599	0.766864	1.11846	1.2991	1.17977	0.843862	0.747037	1.22768	1.25442	0.968972	0.866833	1.006	1.23804	0.939193
526	chr2	68818687	69360164	0.820997	0.975282	1.10563	0.96559	0.740386	0.881528	0.66217	1.44998	0.900573	0.933246	1.10519	0.994543	0.8655	1.01045	1.22024	0.969598	1.11412	1.24808	0.904816	0.911326	1.1247	1.01498	0.743005	0.936033	0.905563	1.02891	0.96562	1.24263	0.687177	1.49972	1.34369	1.02367	1.15382	0.804898	1.29262	0.512728	0.801068	1.26152	0.809857	1.03723	0.92335	0.927267	1.12826	1.41727	0.997703	1.00072
527	chr2	69360165	69874210	0.708705	1.17393	0.713304	0.864955	0.530932	1.23875	1.07757	1.30866	1.36399	0.659901	1.20754	1.22535	0.883839	1.37178	1.50809	1.13805	0.863548	1.06436	0.959969	1.03776	0.958138	0.621922	0.618337	0.841042	0.995805	0.882967	0.863592	0.972624	1.08837	1.473	0.82664	0.80693	1.14765	0.887536	0.676481	1.06075	1.24667	0.703261	0.635486	0.872075	0.727415	1.03158	0.947108	0.993989	1.12693	0.815204
528	chr2	69874211	70410720	0.94787	1.33591	0.869511	1.02421	0.732385	1.17746	1.23259	0.812459	1.05484	1.3204	1.08415	1.00532	0.827076	1.12087	0.73714	1.01136	0.78406	0.955576	1.11142	1.10012	0.825788	1.85901	0.724916	0.956292	0.608443	0.770345	0.948372	1.2475	1.03987	1.09118	0.891767	0.931349	0.904402	0.736333	1.24898	1.00494	0.760077	1.19928	0.996404	1.09767	0.662446	0.79376	1.36008	0.993739	1.09969	0.884513
529	chr2	70410721	70934072	1.27968	1.24758	0.739491	0.966712	0.943694	0.877124	1.26774	0.927281	0.824791	1.04997	0.916887	0.791701	0.981478	0.783368	1.0319	0.948996	0.697147	0.954474	1.17095	0.701852	0.933023	0.99507	1.25984	0.764517	0.913785	1.02694	1.17855	0.979832	1.16068	1.27547	1.10557	0.93157	0.969143	1.19732	1.09835	1.04915	1.39268	0.920158	0.935731	0.803445	0.947169	1.20365	1.26814	0.767171	1.44513	0.917248
530	chr2	70934073	71469366	1.01115	1.07743	0.9781	0.844886	0.855974	0.735609	0.836878	1.19438	1.03114	1.2144	0.996312	1.25379	1.15242	1.02018	1.325	0.758169	1.51972	0.895687	0.94352	1.29019	0.970742	1.08809	1.06629	0.826098	1.0863	1.14205	0.74108	0.754255	0.728535	1.0619	0.960966	0.69873	1.06606	0.906617	0.553785	1.26921	0.672842	0.799087	0.797873	1.0303	0.907487	0.781399	0.646935	0.900813	0.914682	1.01395
531	chr2	71469367	72010329	0.907051	1.4409	0.996487	0.915679	0.543239	1.0333	1.2731	1.23963	1.26001	0.894977	1.09638	1.22303	1.02826	1.20216	0.833843	0.848843	0.978833	1.02136	1.29526	0.70505	1.07642	0.981286	0.837538	0.790853	0.643518	0.96675	1.16242	0.820819	0.949118	1.30805	1.30138	0.831325	1.20067	1.29499	0.650313	0.830666	1.18086	0.602873	0.966832	1.03207	0.592096	0.805243	0.390074	1.0275	1.04666	0.899487
532	chr2	72010330	72551593	1.31445	1.00533	1.14097	1.16351	1.02255	0.685034	0.940849	0.843764	1.34231	1.04528	1.0597	0.543571	0.850993	0.840167	1.15231	0.634631	1.167	1.22704	1.20155	0.717315	1.05938	1.18529	1.07928	1.12962	0.645428	1.16275	1.19651	0.625555	0.921513	1.13825	1.0557	1.20653	1.22551	0.929971	0.800753	1.06934	1.13265	1.26665	1.37921	1.1974	1.16611	0.888259	1.3157	1.0006	0.700139	1.05787
533	chr2	72551594	73132611	0.886443	1.30751	0.633879	0.911798	0.884122	1.00938	1.01232	1.37174	1.20051	0.744108	1.286	1.09561	0.657396	0.74913	0.735143	1.15249	0.761023	0.82008	0.783965	0.844776	1.14598	0.897465	0.986262	1.01892	1.61194	0.953806	0.837007	0.827674	1.18181	0.769632	1.04989	0.563202	1.22286	1.35024	0.818812	1.13556	1.00014	0.853263	1.09293	0.991945	0.593136	0.939213	0.637112	0.97739	0.842364	0.89732
534	chr2	73132612	73679991	0.971325	1.32586	0.96126	0.80372	0.647216	0.885291	1.1136	1.11273	1.44611	1.13606	1.27376	1.13935	0.788726	0.994569	0.709025	1.06622	0.586578	0.787693	1.37128	0.840988	0.869553	1.09128	0.877331	1.08157	0.939817	1.01592	0.781118	1.32589	0.73077	0.448077	0.984476	0.628236	0.965252	0.632403	1.23589	0.90219	0.983148	1.07261	0.914374	0.653141	1.0939	0.905669	0.859289	1.05008	0.965217	0.95316
535	chr2	73679992	74208964	1.1838	1.9625	0.373531	0.750794	1.19278	1.0717	1.20316	1.37502	1.34535	1.70524	1.22132	0.720511	0.823604	1.16743	0.811812	0.791292	0.894358	1.1456	0.737474	1.25094	1.03805	1.13311	1.16643	1.04774	0.825447	1.16256	1.08841	1.39488	1.05528	1.59013	0.90905	0.851271	0.937928	1.14915	1.10864	0.662184	1.13658	1.28644	0.916268	0.947822	1.18546	1.00562	1.00629	1.07754	1.00631	0.912672
536	chr2	74208965	74746513	0.835351	1.54282	1.41849	0.93031	0.816472	1.07853	0.920373	1.46575	0.652129	0.850067	0.934251	0.882506	0.519533	0.902915	1.11694	1.01158	0.986321	0.758165	0.94042	1.07966	1.20997	0.924714	0.816285	0.951202	1.15276	0.983871	1.03289	1.1404	1.02274	0.745463	0.806153	1.09926	0.847001	0.608839	0.771391	1.44275	0.999214	0.969056	0.898481	1.161	1.00876	0.99904	1.07439	0.88751	0.811784	0.832589
537	chr2	74746514	75276448	0.876634	1.64411	0.650836	0.883936	1.13975	1.01668	1.16107	1.01079	1.19628	0.777551	0.671897	0.701852	1.2964	0.842525	0.884871	0.923171	1.04431	1.25737	1.18121	0.924933	1.0791	0.932305	1.37047	0.92668	1.39323	0.942141	0.912143	0.624548	1.20872	0.677312	1.3123	0.644227	1.2698	0.688698	0.79283	0.915897	0.634703	0.962152	0.835522	0.962619	1.10063	1.35923	0.832718	0.634525	0.861538	0.923195
538	chr2	75276449	75824085	1.08898	0.706405	1.13197	1.21681	0.723883	0.744049	0.978456	0.766378	0.870464	1.2188	0.961942	1.22561	0.910242	0.999285	0.89223	1.0742	0.893911	1.41903	0.662043	1.10239	1.07725	1.00881	0.869836	0.907044	1.09517	0.803046	0.964028	0.850786	1.22111	1.05792	1.04566	0.86025	0.938629	1.17926	1.57677	0.865176	1.01421	0.821864	0.75097	1.09274	0.945621	1.25291	1.10408	1.00724	1.02801	1.08896
539	chr2	75824086	76420690	1.0142	1.52948	1.53116	1.36781	0.862389	0.911198	1.08304	1.08207	1.159	1.48823	0.949498	0.956767	1.01975	1.03344	0.64914	1.26676	1.48302	1.28177	1.59791	0.962165	1.01166	1.29951	1.13206	1.22286	1.39764	1.00121	0.717694	1.3813	0.960137	0.688704	1.02963	1.15812	0.896627	1.43127	1.26404	1.21554	1.19016	1.18832	0.879993	0.818864	1.09818	0.683058	1.35959	1.05966	1.00312	0.760033
540	chr2	76420691	77054426	0.98256	1.81568	0.886647	1.09823	0.870418	1.03277	1.18597	1.09525	1.2024	1.0865	0.824484	0.660031	1.01686	1.16998	1.14774	0.955346	1.21927	1.33314	0.93155	1.35414	1.03651	1.04044	1.43272	1.04592	1.22263	1.02841	0.976223	0.879143	0.911096	0.804261	1.01196	0.691207	1.11314	0.773855	1.20897	0.817563	1.33109	1.61814	1.04682	0.783708	0.874856	0.776279	1.03606	0.713209	0.915156	0.844785
541	chr2	77054427	77721735	1.03016	1.00786	0.893165	1.28124	1.15688	1.19101	1.50922	1.02899	1.21678	0.400674	0.809142	1.1362	0.778334	1.00878	1.62713	1.02439	1.08485	1.18589	1.08998	1.34895	1.07322	1.03207	1.0705	0.796323	1.06332	1.09839	0.775907	1.23862	1.123	0.739437	0.859516	0.87873	1.15232	1.0327	0.844562	0.83924	1.00269	1.01894	1.12101	1.24931	0.952772	0.874441	1.1199	1.01642	1.11778	1.10767
542	chr2	77721736	78396336	1.1295	1.65182	1.1625	1.27801	0.95304	0.987729	1.34758	1.16664	1.23444	1.05547	0.658548	1.07197	1.05086	1.02393	0.865381	1.06502	1.39445	1.07191	0.821304	1.47643	1.04427	1.01862	1.23162	0.882356	1.17277	1.049	1.01766	1.29925	1.19245	0.772118	1.01552	1.05829	0.816783	0.639729	1.07782	0.892632	0.818588	1.27596	1.15174	0.964299	0.9641	1.18066	0.951255	1.0786	1.10708	1.01498
543	chr2	78396337	79077951	1.03115	1.65411	1.40928	1.28072	1.21523	0.97995	0.959048	1.0636	1.29716	1.46204	0.693569	1.29253	0.84023	1.14572	0.929908	1.16218	0.939966	0.937594	1.36371	1.1599	1.03289	0.974329	0.876257	0.983623	1.14749	1.02293	0.859434	0.84869	0.919625	0.959979	1.19493	1.0562	0.845941	1.07001	0.75272	1.17021	1.25308	1.10569	1.26442	0.954423	1.0618	0.927283	1.09488	1.03551	1.04259	0.973198
544	chr2	79077952	79686895	1.21244	1.47833	0.781052	1.24861	1.05061	0.862519	1.10579	1.1396	0.804697	1.008	0.897632	1.13354	1.2058	0.839904	1.01221	1.19319	1.44532	1.06719	1.20668	1.03067	1.15604	1.52513	1.54731	0.821801	0.902831	1.09088	1.0437	0.960758	0.935553	1.11764	0.949644	0.933033	0.909539	1.36484	0.911323	1.78528	1.4617	1.46414	0.831419	1.25049	0.703168	1.14739	1.11536	0.959593	1.0277	0.925623
545	chr2	79686896	80309846	1.03046	1.29978	1.37157	0.955426	1.09366	1.15291	1.43953	1.77211	1.36035	1.03969	1.16049	0.991422	1.20242	1.19853	1.55663	0.746079	1.23348	1.02911	1.58552	1.29964	1.06621	0.943425	0.880443	0.971073	1.4026	1.11711	1.26084	1.14796	1.04478	0.820772	0.94487	1.32965	1.27037	0.834364	0.869212	0.873786	1.16706	1.02697	1.16774	1.19417	0.895389	0.770722	1.14295	1.10339	1.23658	0.893218
546	chr2	80309847	80881050	1.07431	0.495716	1.18923	1.2914	0.87573	1.17304	0.826691	1.64878	1.10576	1.37473	1.11374	0.820863	1.77533	1.32616	1.24478	1.10768	0.692697	1.56058	1.03116	1.00251	1.12386	1.26497	1.17597	1.02694	1.06056	1.05346	1.01183	1.05309	1.06241	1.5996	1.19648	1.32322	0.865773	1.40278	0.73003	1.37821	1.16267	1.57584	1.22832	1.2331	0.756055	1.33747	0.850707	0.914241	0.995003	0.866181
547	chr2	80881051	81525673	1.20988	0.855685	0.984015	1.39671	1.21803	1.15215	1.23932	0.961127	1.10034	1.45262	0.988646	1.15088	1.01484	1.32146	0.63009	1.31281	1.05595	1.3587	1.03662	1.36205	0.905142	1.51526	0.890355	0.721777	1.08586	1.01798	1.24642	1.0965	1.04959	1.47268	1.19624	1.29915	1.15384	1.44814	1.20151	1.13951	0.975652	1.24517	1.05963	0.91293	0.779647	1.25732	1.12053	0.986865	0.811952	1.2154
548	chr2	81525674	82188437	1.08618	1.6344	0.988694	1.3766	1.04706	1.32026	1.5652	1.71369	1.02165	1.07484	1.1445	0.841495	0.798683	0.916105	1.17054	1.25787	1.16416	0.903652	0.660192	0.929584	0.984387	0.913592	1.14041	0.991698	0.875348	1.14322	1.40571	1.18207	1.08391	0.954717	1.19066	1.11075	0.654533	0.710326	1.07616	1.08297	1.11723	1.40036	0.975616	1.2204	1.17999	1.01325	1.32106	0.938681	1.16351	1.2364
549	chr2	82188438	82849380	1.16254	0.934163	1.00214	0.800637	1.14242	1.02075	0.912949	1.20397	0.967837	0.873163	1.09842	0.913653	1.23981	1.03853	1.24134	1.34914	1.40671	0.791729	1.01748	1.05033	1.03828	1.11339	0.945033	1.02422	1.14958	1.05631	1.14141	0.84283	1.04717	1.56843	1.25936	1.16132	0.912472	0.723678	0.918268	0.932663	1.27547	1.24797	1.08217	0.958125	0.790482	0.793612	1.21824	0.996423	1.02893	0.890293
550	chr2	82849381	83522916	0.747858	0.969869	1.08842	1.06612	0.995583	1.21788	1.15618	0.709184	1.70494	1.26593	1.01139	1.16932	1.32256	0.853909	1.70466	0.832023	1.3485	0.865241	1.21645	1.26497	0.940208	1.17152	1.02786	0.765495	0.686892	1.08077	1.03447	0.910346	1.06428	1.33883	1.10067	0.769771	1.22195	1.02249	0.843639	1.19677	0.94434	0.820968	0.84622	1.11179	0.755445	0.894536	1.22476	1.15552	1.05803	0.968443
551	chr2	83522917	84187079	1.13612	0.955731	1.32724	0.830272	1.12171	1.21535	1.20468	1.50758	0.805014	1.00729	1.17085	1.51315	0.94837	0.928187	1.27005	0.797589	0.949657	1.1556	1.01884	1.50788	1.04223	1.15815	1.35586	0.931039	1.5592	1.09453	1.01777	0.898741	1.1497	1.0416	1.3302	1.47098	0.841764	1.4402	0.922564	0.989384	1.22065	1.19008	1.02393	1.16167	0.94608	1.21481	1.37649	1.1775	1.09153	1.09923
552	chr2	84187080	84773604	0.952226	1.28739	1.02666	0.935295	0.94274	1.06341	0.972208	1.54073	1.56054	1.27861	1.26003	1.18802	0.844527	0.825601	1.15306	0.752104	1.12923	0.944289	0.918026	1.26162	0.925483	1.43584	1.19385	1.5013	1.2137	0.929836	0.937112	0.834343	1.19153	1.2621	1.3334	0.947233	1.08111	0.382618	1.80776	1.40757	1.07273	1.52483	0.807838	0.847581	0.888552	1.08239	1.02013	1.18413	0.810691	1.30981
553	chr2	84773605	85341617	0.960706	1.23087	0.487653	0.881681	0.67684	1.15589	0.757591	1.11188	1.37248	0.953722	1.12132	0.821192	1.05136	0.92231	1.47746	0.590228	1.14965	1.14298	1.04088	1.05116	0.912922	1.10972	1.49581	0.925105	0.805341	0.928406	0.974883	1.06049	0.828742	0.93007	0.925198	0.807218	0.71259	1.02984	1.11587	1.7512	1.16344	0.988241	1.21066	1.43079	0.878721	0.976101	0.992372	1.02731	0.8174	1.03154
554	chr2	85341618	85881287	1.1539	1.28448	1.12337	1.11688	0.956917	1.29275	0.826498	0.676453	0.905937	1.18162	1.39937	0.932806	1.3947	1.18017	0.731013	0.852516	0.549692	0.765122	0.970456	0.903557	0.982033	1.41957	0.77376	0.917321	0.599022	1.01181	0.999225	1.33307	0.984967	1.25748	0.659948	0.786764	1.03928	1.14809	0.728489	0.680815	1.05158	0.933278	1.09035	1.05516	1.24392	1.06133	0.943064	1.36194	0.777687	1.10581
555	chr2	85881288	86385617	0.745438	0.883761	1.32062	1.13252	1.02087	0.780644	0.904783	0.943558	1.29288	0.603134	1.06988	1.02862	0.672524	0.983695	1.21382	0.90684	0.727568	0.857383	1.09433	0.634466	0.922548	1.17928	0.960387	1.04066	1.02729	1.01658	1.13968	1.13	0.834131	0.794757	1.01568	1.28947	0.950173	0.625694	1.08203	1.12268	0.914992	1.26777	0.613882	0.594284	1.21417	0.714112	0.989017	0.763443	0.867432	1.19959
556	chr2	86385618	86952224	1.18194	1.11096	1.55011	0.714576	1.00469	0.591247	0.91887	0.956392	1.13831	1.77008	0.792293	0.78652	0.931492	1.00826	0.811222	1.05885	0.891146	0.845388	1.00921	1.1135	1.04914	1.14223	1.27206	1.10481	1.01909	1.10866	0.949662	1.27157	0.809643	1.27114	1.07689	0.941901	1.18951	1.19654	1.07847	1.14151	1.31145	0.857213	0.912592	1.02581	0.937447	1.18472	0.808896	1.22349	0.962242	0.877056
557	chr2	86952225	87406383	0.777536	1.19599	0.857328	1.19355	1.09012	0.771107	1.14845	1.05798	1.29883	0.971111	1.25021	1.199	0.979986	0.882825	1.22277	1.23523	0.803268	0.987182	0.933705	1.25185	1.12509	1.18295	0.818521	0.964128	1.02838	0.959017	0.972955	1.58951	1.00105	0.969089	1.11491	1.39484	1.3432	1.28975	0.720769	1.02791	1.0069	1.2849	1.07456	1.25198	0.98045	0.957834	1.12837	1.16129	1.10714	1.44647
558	chr2	87406384	87856190	1.18537	1.10883	1.33328	1.22483	0.802626	0.955126	1.08289	1.19003	0.944366	0.993482	1.17424	0.992305	1.14814	0.93755	0.988334	0.873184	1.01211	0.858445	1.06483	0.777408	1.02365	1.01127	0.720398	1.42451	1.08872	1.16005	0.693034	0.847899	0.895467	1.03714	1.12186	0.916803	1.15374	1.06752	0.783813	0.839714	0.852383	1.1404	0.843748	1.26943	0.755898	1.29732	1.1935	0.954012	0.97629	1.11327
559	chr2	87856191	88313313	1.23128	1.71244	0.990647	1.26126	1.02079	1.08756	0.485416	0.839167	1.16	1.44358	1.11176	1.00827	0.942271	0.841527	1.46447	0.758836	0.864288	0.930252	1.22737	0.953329	1.13552	1.07646	0.944924	1.14004	1.16893	1.09416	1.01827	1.0305	1.00192	1.43142	0.930216	0.994134	1.14798	1.35402	0.846255	1.08206	1.33719	1.31883	1.00672	0.873931	1.05267	0.791111	1.07347	1.10733	1.07679	1.2198
560	chr2	88313314	88882051	0.734545	1.51258	1.34654	0.939805	0.734048	1.06241	1.47053	1.4346	1.24008	1.01502	0.911286	1.03656	1.2697	1.2666	0.737253	0.767586	0.95784	1.18846	0.867097	1.02921	0.943256	1.06373	1.86765	0.829698	1.33591	1.10646	0.881437	0.847004	1.12383	1.17846	1.03954	0.823568	1.11947	1.56306	1.28539	1.22241	1.01437	1.23516	0.90048	1.09706	0.945024	0.825042	1.08079	1.26669	0.840515	1.02292
561	chr2	88882052	89438130	1.64355	1.19975	0.393624	0.863345	1.30509	1.18021	0.79706	1.5582	0.946137	0.737941	0.881475	1.01002	1.16258	0.98615	1.145	1.13443	0.904325	1.1729	0.984616	0.764335	0.979863	1.0699	0.789843	0.991209	1.41502	1.19279	1.24176	1.36927	1.04278	0.975209	1.2438	1.19779	1.30686	1.05851	0.910653	1.24268	1.21745	1.07813	1.04515	1.27061	0.804372	0.966573	0.980365	1.08359	0.824807	1.07114
562	chr2	89438131	90043760	1.0494	1.52543	0.671541	0.93592	0.970705	1.32313	0.869971	0.970884	0.80935	0.756637	0.829277	0.689703	0.698571	0.633331	1.2609	1.04327	0.931642	1.02644	0.889231	1.05066	1.14236	0.985257	0.707029	1.00405	1.01915	1.17234	0.574967	0.637072	0.94422	1.11021	0.879118	1.07161	0.959403	0.968029	0.672748	0.676261	1.17155	0.720483	0.905257	0.778023	0.745173	0.816772	0.809228	0.986794	0.900502	1.07558
563	chr2	90043761	90396700	1.25771	1.33356	0.974318	1.18658	1.0945	1.06209	1.32259	1.01784	1.12185	1.26947	1.10298	1.37931	0.825929	0.92572	0.751967	0.821295	1.06083	0.86187	1.20841	1.28696	0.863558	1.1699	1.07867	0.867829	1.30695	1.05691	0.864983	1.20024	0.920009	0.749935	1.02538	0.716613	0.899818	1.37763	1.18599	0.812354	1.2418	1.48989	1.01385	1.25473	1.32065	0.864063	0.734836	0.83811	0.938309	0.969586
564	chr2	90396701	91623196	1.1828	1.72385	1.09553	1.62256	1.02331	1.15624	0.984048	1.20354	0.950683	1.45095	0.830077	1.40604	0.98732	1.15846	1.13926	0.848272	0.947635	1.031	1.17686	1.00639	1.05609	1.35406	0.622199	1.22816	1.30025	0.94912	1.50931	0.966245	1.04679	0.630133	1.04246	0.974635	0.787099	1.47013	0.723412	1.01791	1.29955	1.33757	1.29781	1.38829	1.88667	1.09039	1.09373	1.01483	0.881746	1.09914
565	chr2	91623197	91788929	1.01673	1.12299	0.780294	0.832251	0.454084	0.876685	0.923466	0.980917	0.743069	0.842115	0.937598	0.801062	0.658795	0.98969	1.13451	1.04692	0.523924	1.09842	0.662401	0.81601	0.89427	0.804408	0.456913	0.993073	1.14972	0.917805	0.907092	1.02793	0.95047	1.12313	0.899804	0.784757	0.690029	0.963516	0.642301	0.792757	0.380963	0.535883	0.940951	0.937029	1.199	1.0394	0.987772	0.612956	0.816301	0.618855
566	chr2	91788930	91950622	0.805729	0.935714	0.913512	1.13728	0.802089	0.830951	1.33631	0.849956	1.55788	0.846769	0.950948	0.913482	0.528588	1.24922	0.933619	1.25506	0.915017	1.11898	0.924355	0.935912	1.1214	1.16087	0.496315	1.08303	0.700608	0.987437	0.818475	0.935279	0.488678	1.18447	1.02657	0.64494	0.559953	0.736832	1.09838	0.8306	0.854577	1.10406	0.71745	0.883803	0.947207	0.733882	1.17538	1.10558	0.841207	0.769986
567	chr2	91950623	92266805	1.25777	0.753522	1.14192	1.58968	1.27662	0.749673	1.67051	1.4104	1.12008	1.3054	1.17912	1.10914	0.866274	1.49265	0.705355	0.734894	1.55915	1.15328	1.47668	1.59698	1.08151	1.11494	1.63696	0.652703	1.52658	1.03343	0.837449	1.4171	1.02016	1.05747	1.25018	1.12331	0.960289	1.11169	1.2607	0.813501	1.45069	1.71126	1.01329	1.22584	1.22611	1.10656	1.1292	1.05363	0.766708	1.13143
568	chr2	92266806	92313616	2.17213	2.97071	1.41184	2.26805	2.10243	1.8758	2.59289	1.95571	2.86185	1.98692	1.72688	1.71998	1.85823	1.69451	1.64666	1.5223	1.72793	1.88653	1.3775	2.57158	2.23679	2.58224	1.76216	1.3543	2.77634	1.78878	2.06303	2.62514	2.09125	2.21753	2.19888	1.8193	2.21117	2.79743	2.67477	2.41767	1.61285	1.56562	2.16478	1.90673	2.11728	1.79873	2.11226	1.89493	1.9668	1.59697
569	chr2	92313617	95480405	1.8651	2.47163	1.51938	2.01067	1.80815	1.34612	2.56158	1.54273	1.7908	1.14695	1.57333	1.42688	1.63588	1.6106	1.1004	1.35927	2.08119	1.61652	1.68357	1.59919	1.4975	2.21139	2.00734	1.08379	1.95217	1.63088	1.52124	1.8678	1.73366	1.4833	1.44268	1.27398	1.29612	2.07746	2.65702	1.50573	1.52299	1.41789	1.38176	1.85436	1.43994	1.7626	1.6657	1.37125	1.66559	1.5441
570	chr2	95480406	96029491	1.01771	1.45459	1.21555	1.31492	1.00171	1.14284	1.12886	1.18892	1.44051	0.742327	0.578256	0.820573	0.748973	0.725501	1.37605	1.52764	0.991967	1.29355	1.26563	0.672076	0.97206	0.771749	0.636916	0.800645	1.1803	0.888113	1.11072	0.844347	0.99288	1.07138	1.09033	1.4608	0.859085	1.28322	1.41468	0.746927	1.25165	0.997857	0.952556	1.12287	1.11857	1.24664	0.955796	1.14086	0.801361	1.03886
571	chr2	96029492	96477519	0.992846	1.44377	0.929235	0.981068	0.924744	1.0413	1.16786	0.866117	0.465882	0.578628	0.781354	0.899953	0.946922	0.949158	1.22725	1.26117	0.590077	0.722859	1.2442	0.744362	0.988183	1.65411	1.60331	0.907976	1.08705	1.02713	0.583453	0.797914	1.3783	1.03783	1.33186	0.915156	0.917218	0.73821	1.3285	1.12263	1.17118	1.31139	0.809478	1.13467	1.45331	1.40493	0.910298	0.749565	1.53104	1.27028
572	chr2	96477520	97000036	1.23873	1.1762	0.767444	0.585571	0.919283	1.08096	0.999724	1.17777	0.877566	1.2779	1.31558	1.24246	0.775409	0.996523	1.11772	1.31084	1.02712	0.562677	0.962157	0.673579	0.959362	1.11485	1.16001	0.951171	1.125	1.03189	1.33882	1.30111	1.08955	0.971503	0.87686	0.760393	0.891848	1.42185	1.33075	0.973916	0.96186	1.3652	1.16648	1.06772	0.947917	1.35163	1.12791	0.856642	1.02795	1.07224
573	chr2	97000037	97577219	1.41792	1.13983	1.16602	0.789502	1.08415	1.16663	1.15135	1.07399	1.17027	0.730682	1.14604	1.23929	1.65178	1.22549	1.17148	0.888001	0.889776	0.945859	0.64069	0.852308	0.945667	1.10542	0.715899	0.957518	1.16691	0.930248	0.819436	1.07878	0.89704	0.926091	1.00247	1.15909	1.18104	1.17277	1.33989	1.06152	1.32383	1.18307	0.862128	0.861945	0.76955	0.701909	1.1036	1.04279	0.723143	0.923058
574	chr2	97577220	98061464	1.0041	1.2171	0.950898	1.29753	1.09927	1.23156	1.43459	1.71843	0.87546	1.21202	1.08963	1.11145	1.07065	1.22816	1.57612	1.23095	1.44505	0.81091	0.674881	0.703739	1.14627	0.901413	1.08758	1.04501	1.31725	1.02292	0.831247	1.65544	1.23182	1.14237	1.0745	1.32339	1.30613	0.617359	1.83237	1.05871	0.866289	1.23374	1.02661	1.35278	1.24686	1.24322	1.19242	1.07722	1.02602	1.05441
575	chr2	98061465	98574590	0.739471	1.20772	0.630382	1.01553	0.982155	0.865898	1.15814	1.26125	0.901067	1.34929	0.989231	1.31838	1.30325	0.941218	0.906861	0.908402	1.28613	1.10193	1.01957	1.10022	1.05939	0.890129	0.702115	0.870171	0.880829	1.13674	1.1251	0.436734	0.942337	0.988516	0.978041	0.860868	0.965944	0.93504	1.48073	0.929286	1.05116	0.882337	1.20512	1.05932	0.969573	0.885041	1.32995	0.9707	0.778755	0.927115
576	chr2	98574591	99123023	1.07736	1.42387	0.858915	0.764089	1.05857	1.10203	1.28745	1.01183	0.927122	1.37085	1.13447	0.549388	0.59845	0.851024	1.11991	0.94414	1.22028	1.04446	1.05768	1.13635	0.904344	1.44853	0.925842	1.0467	1.29892	0.891418	1.0435	1.01355	1.18586	0.989817	1.07366	0.744429	0.848747	1.48265	1.02278	1.50251	1.08949	0.853154	0.985006	0.763752	1.07874	1.15298	0.954171	1.24458	0.931663	0.962296
577	chr2	99123024	99669347	0.860689	1.0362	0.980937	1.02745	0.779845	1.11513	1.2372	1.13319	1.15841	1.32695	1.19693	0.926108	0.980404	0.838343	0.98221	0.784327	1.30212	0.781467	0.835914	0.913314	1.15617	0.839706	0.738887	1.32096	1.17646	1.1007	1.00952	0.931909	0.860486	0.889578	1.21053	0.778211	1.0445	1.29193	1.20156	1.29397	1.11762	0.929007	0.981604	1.01556	0.816548	0.861506	0.907753	0.864218	0.712285	1.0004
578	chr2	99669348	100247789	0.754608	1.42504	0.809583	0.676003	0.98009	0.975757	0.835368	1.40863	1.03313	1.03435	0.858373	1.28958	0.899168	1.01036	0.939632	1.58175	1.01162	1.23117	0.847199	0.974561	1.18638	1.3571	1.22728	0.990043	1.24378	0.925568	1.82183	0.556623	0.801426	1.19197	0.901694	1.26459	1.09537	0.710751	1.04075	0.897064	1.09304	0.901724	0.845171	1.09579	1.10704	0.74312	1.16588	0.773354	1.1952	0.763264
579	chr2	100247790	100790488	1.05623	1.29383	0.829296	0.845995	1.23636	1.10666	1.22908	1.25398	0.788534	0.876588	0.968176	1.20979	1.00479	1.18892	1.11364	1.02139	0.835541	0.816723	0.852208	0.90093	0.905125	0.861225	1.06874	0.886703	1.07217	0.897189	0.986443	1.5618	0.922474	1.24512	1.07673	0.659922	0.672088	1.334	0.984268	1.1379	1.01756	1.05771	1.13382	1.05637	0.789344	1.0104	0.916605	1.27785	0.962144	1.00259
580	chr2	100790489	101323799	1.17421	1.0862	1.00262	0.582727	1.03879	1.09794	1.3539	0.920227	1.09583	1.40697	1.36094	1.23959	1.03009	0.705108	0.798938	1.06421	1.02321	1.23741	0.94285	1.0013	1.09813	0.882822	1.11398	0.86771	0.795697	0.890033	0.869401	0.716354	1.30042	0.949085	0.962084	1.20316	0.718886	1.15533	1.14471	1.15048	0.946612	1.13404	0.841579	0.865724	1.06512	1.15907	1.37354	1.13253	0.937818	0.78229
581	chr2	101323800	101861752	0.977111	1.07791	0.859438	0.798303	1.06264	1.08067	0.58518	0.910713	0.890458	0.654023	0.800459	1.22369	1.21244	0.89882	1.34679	0.877876	0.710714	1.18436	0.693305	1.01798	0.934093	1.3518	1.11367	1.17125	0.707137	0.909668	1.06042	1.09552	0.861975	0.968167	1.02656	0.722353	0.91016	1.20196	1.09623	0.876203	0.986516	1.13263	0.901135	1.16871	0.887978	0.833782	1.36053	0.795488	0.724473	0.909314
582	chr2	101861753	102414623	0.988575	0.716906	0.691858	0.91929	1.08212	0.986765	1.13401	1.39208	0.964103	1.49433	1.07318	1.00881	0.928443	0.790017	1.17879	0.667921	1.19053	0.996248	0.798781	1.01357	1.24858	0.897879	0.769993	1.20272	0.799211	0.886734	0.950067	1.28871	1.03744	0.924803	0.973136	0.820651	1.05974	0.784703	1.8751	0.970296	0.627598	1.11789	0.80329	0.865615	0.544725	1.32223	0.995726	1.09564	0.798885	1.02405
583	chr2	102414624	102934720	0.804444	1.07383	0.914638	0.837971	0.865332	1.0716	0.723945	1.03136	1.11676	1.14832	0.92411	0.690307	1.25518	0.658704	0.764005	0.937811	1.44932	1.21149	1.07629	0.963424	1.10827	1.5903	1.16694	0.740437	0.916346	1.0164	0.960911	0.915628	1.03635	0.885477	1.10898	1.63695	0.611282	1.19455	1.07566	0.706562	0.927731	0.830559	0.775952	1.05658	1.02984	0.561768	0.881342	0.926802	0.713185	0.649098
584	chr2	102934721	103521338	1.02641	0.939833	1.26912	0.676163	1.23924	1.21977	1.22502	1.30669	1.19605	1.1739	0.892334	1.14915	0.673043	0.803441	1.34678	0.968203	0.94917	1.10044	1.09007	0.994605	0.953191	1.10788	1.18915	0.986299	0.900686	1.07832	0.98556	1.31301	0.776655	1.21756	0.977113	0.762189	1.14407	0.637477	1.05395	1.12597	1.01779	0.931229	0.861168	1.18799	1.19836	0.992309	1.29694	1.20751	1.04203	0.81396
585	chr2	103521339	104118937	1.10342	0.536663	1.24158	1.36112	0.864119	1.00238	1.09478	1.06552	1.15945	0.898571	1.00458	0.963087	0.839603	0.916381	0.984429	0.999043	1.16144	1.04745	0.972277	1.37457	0.774814	0.94487	1.25998	0.912335	1.20855	1.21574	0.688736	1.03001	1.1196	1.08443	1.0143	0.91065	0.893275	1.3514	1.13466	0.914691	0.853469	1.33961	0.794251	0.980894	0.800681	1.13039	1.02168	0.87878	1.0909	0.993617
586	chr2	104118938	104756436	1.07283	0.515204	1.35808	1.21612	1.23641	0.791865	1.2249	1.15076	1.09472	1.00486	1.2223	1.5323	0.813196	0.882638	1.13642	1.01556	1.47008	0.88871	1.07766	1.13972	0.970792	1.583	0.979459	0.898487	1.08191	1.03048	1.01135	0.928884	0.847894	1.22063	1.27395	0.977903	1.30943	1.04383	1.34862	2.12989	0.789725	1.05441	0.896443	0.938421	0.833062	1.17966	0.878208	0.903454	1.09138	0.819892
587	chr2	104756437	105343470	1.15324	1.28357	1.14927	1.07754	1.40391	0.846903	0.902969	1.08594	1.42554	1.12416	1.13368	1.09999	1.26355	1.24145	0.933657	1.20672	0.713963	0.812358	1.26051	1.26568	0.857126	1.31221	0.780516	1.10539	1.1257	1.04411	1.23661	1.08418	1.23261	1.74788	1.13997	1.3599	1.54141	0.721956	1.10949	1.03277	1.07678	0.864729	1.19981	0.952315	0.919852	0.875987	0.895821	0.8708	0.855415	0.969121
588	chr2	105343471	105904978	1.29872	0.658005	1.19159	0.731654	1.1482	0.832094	1.08292	0.892884	0.875044	0.970534	1.15898	0.485894	1.37966	0.889533	0.687528	0.855421	1.15748	1.23741	1.43125	0.959627	0.890635	0.885708	1.03921	1.10244	0.843296	1.0459	1.16871	1.14175	1.18406	1.45232	1.10537	1.24224	1.30026	0.777145	0.974275	0.975657	0.966781	1.23218	1.00204	1.20213	0.973696	0.884611	0.644664	0.97526	1.01113	1.02577
589	chr2	105904979	106425772	1.42195	0.713415	0.783513	0.625051	1.17762	1.03842	1.0288	0.848629	1.09853	0.982719	1.29409	1.33905	1.17607	0.954037	0.982648	1.03941	0.740982	1.24894	0.830089	1.03925	1.19246	0.82839	0.993343	0.827548	0.915143	1.07937	1.14729	1.11297	0.894537	0.913154	0.980758	0.895999	1.31396	1.01391	0.947644	1.22476	0.88564	1.16192	1.10958	1.39321	0.884951	1.2309	0.773837	0.946606	0.84151	1.10788
590	chr2	106425773	106988521	1.53987	0.887495	1.08334	0.999424	1.21491	0.855379	1.50005	1.05293	1.15264	0.675493	1.06923	1.13028	1.57762	0.861353	1.13092	0.987291	1.00011	0.995319	0.999071	0.656802	1.1344	1.3678	0.798301	1.05615	0.936252	0.929349	1.07237	0.937589	0.821972	0.854152	1.15554	1.39506	0.946655	1.10027	1.09311	1.30691	0.826203	1.28011	0.986323	0.908422	1.06705	0.859702	0.739126	1.27181	0.8394	0.891892
591	chr2	106988522	107521543	0.761689	1.33729	1.25277	0.931744	1.18839	1.10513	0.80585	1.03859	1.0596	1.35487	1.05385	0.735753	1.0329	1.27475	1.0942	1.12697	0.941425	1.16649	1.01182	1.08497	1.01463	1.17192	0.875662	0.931644	1.24447	1.01223	0.716352	0.759742	0.985464	1.07922	1.11012	1.47956	0.840217	0.90916	0.865555	1.17715	1.10521	1.06377	1.01289	0.97191	0.979026	1.00372	0.709914	1.25735	1.17705	0.945092
592	chr2	107521544	108131095	0.861935	1.54229	0.961252	0.871437	1.03248	1.14172	0.772276	1.43382	1.2388	0.813953	0.696325	0.82066	1.03585	0.813486	1.06815	0.776945	1.37235	0.844998	1.04143	1.13638	0.920505	1.05186	1.36653	0.715844	1.02616	1.00604	0.993875	0.766973	0.707522	0.829749	1.1212	0.894124	0.881974	1.10163	1.12794	0.897583	0.692869	1.0386	0.889277	1.05511	0.98764	1.12758	1.17273	1.1687	0.987842	0.983077
593	chr2	108131096	108701676	0.8399	1.49719	1.03792	0.844448	1.26847	1.24633	1.29847	1.02817	1.14989	1.00192	1.04427	1.1027	0.724398	1.0168	0.981996	1.06376	1.12972	0.649655	1.10083	1.01566	0.945957	1.14453	1.22063	1.19252	1.117	0.880861	0.80746	1.33072	1.07104	1.16073	1.05751	0.927369	0.779335	1.05936	1.1952	1.22405	1.21853	1.5012	0.975486	0.82874	0.837507	0.985259	1.11154	0.758461	0.9069	1.12724
594	chr2	108701677	109295413	1.02904	0.85943	1.23152	1.17848	1.09025	1.15359	1.07543	1.37746	0.689865	1.28594	1.76913	1.27549	1.12373	0.8638	1.05411	1.19758	0.820828	1.16158	0.827461	0.793842	0.94517	0.955982	0.794295	0.690533	1.20011	0.976649	0.731943	1.33172	1.0591	0.987244	0.997011	0.995569	0.897237	1.3583	1.13194	1.71202	0.786331	1.11948	1.06547	1.38808	0.805445	0.820214	0.952457	0.824843	0.929588	1.0338
595	chr2	109295414	109834054	1.12724	1.13338	1.61289	1.25287	1.03877	1.09794	1.00673	1.36032	1.09581	0.937967	0.782529	1.58919	0.956499	1.06832	1.24833	0.973004	1.2901	1.1371	1.00788	1.09817	0.860184	1.66379	0.768257	0.899837	1.00991	1.07601	0.96599	1.11931	1.09068	0.677904	0.892533	0.955444	1.21991	1.01668	1.03024	1.19647	1.13594	0.874826	1.26235	0.514016	0.968284	0.921321	1.40474	0.747463	0.959143	0.805299
596	chr2	109834055	110478999	1.12896	0.932303	0.887944	1.05115	1.38951	0.575667	1.1001	1.09118	1.05483	1.24044	1.12168	0.71507	0.801887	0.615205	1.06206	1.22546	1.13479	0.957232	0.843375	0.978106	1.09454	1.08993	0.814623	0.721705	0.905906	1.0724	1.26487	0.761489	0.689709	0.945523	0.879639	0.513676	1.04648	1.37868	0.943444	1.0593	0.935234	0.930103	0.715906	0.821405	0.706824	0.780758	0.729051	1.03344	0.898101	0.905952
597	chr2	110479000	110854524	1.11342	1.0647	1.21303	0.742647	1.16804	0.924833	1.15873	0.975553	1.47601	0.810436	0.500651	1.03887	1.06191	1.11287	1.27848	1.26564	1.13041	1.19503	0.906218	1.21363	1.22472	1.26821	0.798069	0.928431	1.17718	1.10081	0.97439	1.16102	1.25429	0.808469	0.963226	1.2876	1.24778	1.19159	0.942031	0.827514	1.23964	0.937802	1.06252	1.12199	0.941127	1.4239	0.954424	1.22693	0.860798	1.01835
598	chr2	110854525	111276346	1.44482	1.33211	0.866362	0.857407	1.04951	0.647301	1.39745	1.17168	1.06179	1.01271	0.567191	1.25383	1.57265	1.13379	1.67237	1.38925	1.2612	1.06286	0.938745	1.57263	1.35136	1.53615	0.798064	0.92866	0.96576	0.982359	0.844023	1.11656	1.1524	0.897831	1.13391	1.39448	1.09736	1.60393	1.05512	0.871801	1.11256	0.970484	1.24689	1.14881	0.972755	1.06846	1.07763	1.11354	0.774528	1.04179
599	chr2	111276347	111741156	1.13418	1.16896	1.17753	1.70562	0.950275	1.31098	1.25884	1.45054	1.65564	0.923573	0.600455	1.10639	1.17396	1.20088	0.898933	0.905779	0.862432	1.16409	1.23874	0.941007	1.20504	1.28275	0.736753	0.759905	1.38965	1.19361	1.02573	0.969167	0.986951	0.896757	0.855888	1.39738	1.06659	0.978343	0.832649	0.928829	0.727358	0.774944	0.820061	1.06219	1.26112	1.00204	0.773182	0.863986	1.25619	0.9017
600	chr2	111741157	112186360	0.848494	0.688439	0.694537	1.33029	0.815536	1.01125	0.92944	1.18727	0.986201	1.07361	1.14624	0.656051	0.842925	0.783348	1.68593	0.582199	1.14348	1.26991	0.960488	0.583439	1.09842	0.64118	1.10816	0.897587	0.729543	0.979964	1.03274	0.67124	0.811953	1.07972	0.953265	1.1009	1.06086	0.919695	1.02515	1.34688	1.14018	1.02176	1.00651	0.913793	0.892591	0.89192	0.77536	0.861037	1.07101	0.964548
601	chr2	112186361	112604089	0.805531	1.06603	0.867465	1.31218	0.998208	0.924389	1.29705	1.28406	0.690567	0.811138	0.838573	1.12941	0.664906	1.05238	1.27823	0.893066	1.0441	1.15899	1.12044	0.956361	0.818596	0.79956	0.799115	0.927095	1.18026	0.929074	1.17193	0.847799	0.717662	1.03724	0.746953	1.03776	0.925362	1.00966	1.39625	0.871994	0.761931	1.21251	0.571838	1.1228	1.28857	1.21261	1.079	0.725621	1.18437	0.9925
602	chr2	112604090	113146234	1.38148	0.652607	1.14417	0.773498	0.701297	1.0932	1.25242	0.917203	1.36301	0.981905	0.726592	1.47863	0.926459	1.2405	1.28914	0.969122	1.3982	1.18673	0.978164	1.27185	1.05064	0.952159	0.88863	0.734924	1.17189	0.926244	0.82552	0.961236	0.829688	1.65777	0.91976	1.07653	0.887364	0.793942	0.826333	0.879225	0.923604	0.777895	0.978605	1.26874	0.997979	1.33362	0.841242	0.709279	0.898688	0.876668
603	chr2	113146235	113659427	1.04266	1.20235	1.26082	0.995736	1.55919	1.01584	1.06142	1.19928	0.963081	1.32042	0.982599	0.944372	1.35362	1.12092	1.71999	1.10325	0.784069	1.25208	1.14221	1.03355	0.888601	0.896279	1.29725	0.86064	1.00398	1.3234	1.30815	0.623741	1.46798	0.818448	1.07235	0.823894	0.969008	1.05851	0.946226	0.742795	1.20343	1.13766	1.12103	1.20477	1.13566	1.14648	1.3292	0.903366	1.05657	1.15661
604	chr2	113659428	114189445	0.861264	1.36676	0.86197	1.14785	1.11114	0.98585	1.16953	0.861796	0.647137	1.27455	0.810119	1.05426	1.19569	1.12864	1.21676	0.851999	0.803762	0.892709	1.01857	1.20884	0.9309	0.949155	0.842008	1.13808	1.15592	1.11773	0.868275	1.49693	1.23351	1.69888	0.927296	0.905119	0.75851	0.809893	0.812975	1.06382	0.963161	0.916466	0.970258	1.03261	1.08436	0.77867	0.525528	1.23134	0.708265	0.845609
605	chr2	114189446	114666637	1.0035	1.21844	1.19617	1.32519	1.00574	1.59667	1.70127	1.18366	0.963656	1.04754	0.924716	0.991653	1.1041	0.845783	0.812015	1.26029	0.976332	1.21841	1.07259	0.766456	0.987242	1.09088	1.12575	1.13542	1.01214	1.01663	0.702819	1.13227	0.754013	1.05115	0.874694	1.11746	0.847969	1.10091	0.83866	1.14642	1.07457	1.01963	1.19886	1.21682	1.21511	0.858827	1.09686	1.07703	0.983425	0.998797
606	chr2	114666638	115234424	1.16172	0.400865	1.19024	0.972164	0.972629	1.22036	1.01205	0.710499	0.722806	0.96026	0.710973	1.08708	0.766212	0.95637	1.08276	1.04818	1.26418	0.880549	1.06403	1.08034	1.02134	1.08948	1.17666	0.739723	0.884839	0.914241	1.03	1.41119	1.42025	0.915083	0.961454	0.866167	0.923091	1.42322	1.40616	1.05821	1.09802	1.05755	1.09277	0.984775	1.05214	0.947424	0.695131	1.0582	1.15962	1.10865
607	chr2	115234425	115839906	1.08922	0.727505	0.958802	1.12294	1.33582	1.28321	0.972051	0.909967	1.06658	1.1155	0.976884	1.05437	1.04838	1.04182	1.03044	1.04241	1.22937	0.806786	1.01021	0.634603	1.06617	0.805043	0.874767	1.10259	1.16344	1.02711	0.864605	1.32082	0.959825	1.22033	0.941557	1.03073	1.02015	1.13198	0.942641	0.931237	0.643888	0.964134	0.89456	1.158	0.618785	0.909706	1.0955	0.969272	1.27866	1.00049
608	chr2	115839907	116509997	1.16494	1.3011	0.914326	1.00938	1.17367	1.34724	1.28512	1.10623	1.15185	1.51976	0.739706	0.843633	1.78939	0.804143	1.51278	1.22405	1.13434	1.14259	0.801766	1.0435	1.23789	1.26699	1.47887	1.05956	0.829234	1.08129	0.941939	1.59325	1.17203	1.8755	1.25579	0.989813	1.19483	0.92261	1.00895	1.14639	0.952193	1.26962	0.968725	0.868084	1.12051	1.14121	1.06805	1.1633	0.990952	1.12975
609	chr2	116509998	117203011	0.830412	0.813988	1.06264	1.24738	1.11719	1.20016	0.772802	1.06394	1.23	1.23794	0.983958	1.11236	1.25315	0.976256	1.64676	1.27602	1.37221	1.13308	1.01365	1.50577	1.33813	1.15744	0.82864	0.801431	0.855797	0.875523	1.0962	0.949283	0.980788	1.19897	1.05797	1.1524	1.07369	1.11098	1.23689	0.977342	1.08448	0.927439	1.15427	1.10681	0.986892	0.974453	0.951746	0.888308	1.17063	0.778789
610	chr2	117203012	117858169	1.37094	0.958018	1.53134	1.05497	0.95661	1.36611	1.10728	1.19724	0.883375	1.46475	1.2417	1.00467	0.949104	0.946035	0.986418	0.862331	0.789625	0.883979	1.40603	0.476086	1.1037	1.38392	0.709861	1.09721	0.99722	1.109	1.2207	1.50432	1.06244	0.808659	1.08098	1.17317	1.05303	0.744805	1.54579	1.16414	1.11405	1.21065	1.06293	1.13044	1.05568	0.895293	1.37238	1.1739	0.638646	0.923516
611	chr2	117858170	118475096	0.818265	0.544453	1.03787	0.760213	0.924389	0.844816	0.912387	1.17476	1.14981	0.970636	1.01258	1.47	1.03465	0.996455	1.02454	1.09231	0.605154	1.20173	1.24957	0.895968	1.03115	1.11357	1.11254	0.894308	1.11706	1.09508	0.962726	1.45138	0.631175	1.20199	1.29811	0.794911	1.02542	1.18125	0.751124	1.30567	0.996827	1.47883	0.903788	0.92913	0.807497	0.900547	1.05126	1.0249	1.06805	0.899606
612	chr2	118475097	119034876	1.05322	0.844954	0.969317	1.18495	0.955214	0.676262	1.05303	0.769587	0.737658	0.958807	0.8232	1.13523	1.18262	1.14899	1.71233	0.919851	0.85629	1.33192	0.919982	1.37243	1.03178	1.14013	0.951067	0.621557	0.996038	0.892352	1.08899	1.34232	1.10359	0.810709	0.976169	1.10965	1.14156	1.0472	1.33467	0.958743	1.13523	1.14303	0.920859	0.80993	0.979677	0.767397	1.29572	1.12898	0.841004	0.80235
613	chr2	119034877	119557976	1.22946	1.22551	1.01484	0.965636	1.2366	0.815145	1.00201	1.22768	0.870419	0.822943	1.0221	1.09661	1.05491	0.879863	0.905222	0.94527	0.895038	0.906142	1.10244	1.0834	0.858978	0.792498	1.60857	1.04989	1.02304	1.11689	0.690556	0.88569	0.710191	1.19934	1.01554	0.840815	0.64752	1.07778	1.26032	0.874893	1.04438	1.22759	0.901778	1.16084	1.16259	0.916597	1.20835	0.769843	1.04853	0.965964
614	chr2	119557977	120108122	1.10589	1.12217	0.978817	1.13605	1.13243	1.58877	0.940817	1.03567	0.748942	1.21428	0.641374	1.38319	0.769302	1.21508	1.53856	0.971069	1.02798	0.928794	0.780557	1.5359	1.09281	1.08988	0.988097	0.857992	0.845396	1.11419	0.808219	1.19761	0.771579	1.01425	0.996683	0.771296	0.777536	0.857934	0.870872	0.845435	0.865004	1.31907	0.927937	0.834882	0.972436	1.32272	0.782285	0.854463	0.744748	1.00135
615	chr2	120108123	120666063	1.01239	1.05884	0.665064	1.35983	1.17037	0.857439	0.887023	1.71617	0.929555	1.0121	0.76894	1.26201	1.0375	0.857037	0.928824	1.30976	0.860785	0.851554	0.653234	0.706327	1.2013	1.00026	1.39837	1.02468	0.980319	1.11327	1.15269	0.928227	0.779367	1.65056	0.904737	1.3069	1.06832	1.20235	0.823409	1.24733	1.31338	0.829191	1.00824	1.01662	0.657282	0.624329	0.932609	0.841143	0.876233	0.862463
616	chr2	120666064	121234086	0.727395	1.20797	0.573077	1.19125	0.758749	0.935119	1.11794	1.24914	1.44425	1.18541	0.754464	0.963152	1.00289	0.71489	1.0545	0.993132	0.948298	0.989214	1.00591	0.721926	1.21225	0.946534	0.849994	0.809221	1.10967	1.08992	1.07027	0.847809	0.983348	0.915199	1.07952	1.20883	1.33909	1.21404	1.4102	1.03001	1.19322	0.585553	1.03839	0.874342	0.811766	1.03366	1.09904	0.980515	0.824852	0.988547
617	chr2	121234087	121725967	0.970946	0.895818	1.17509	1.32535	1.05025	0.725047	0.908345	0.962997	0.827798	1.08791	0.980879	0.997032	1.24191	0.967799	0.632855	1.01036	0.663144	1.00682	0.970253	0.984667	1.03574	0.584978	1.04437	1.01037	0.79304	0.955293	1.30272	1.52523	1.05888	0.766421	0.745079	1.03541	1.29879	0.880943	0.91672	1.42299	0.727096	0.855163	0.880767	0.905534	0.834708	0.95366	1.3108	1.27181	1.24708	0.888946
618	chr2	121725968	122244604	1.07541	1.09765	0.854352	0.808343	1.22152	1.22587	0.878456	1.06692	0.844487	1.27618	1.12774	1.31679	1.18719	1.04915	1.27729	1.07878	0.762833	0.860397	1.0349	0.956438	0.987536	1.01046	0.959308	1.12551	1.08979	1.1555	1.11259	1.12976	0.86712	1.07713	0.7811	1.19365	1.10827	1.03083	1.42524	1.30334	1.44834	0.747761	0.988281	0.870965	0.987529	0.581846	1.29602	0.809961	1.1064	0.942328
619	chr2	122244605	122803166	1.06493	0.982557	0.996681	0.973739	0.907283	1.03924	1.19502	0.861221	1.3428	0.876736	0.969326	0.828787	0.658558	1.13544	1.08365	1.01745	1.0458	0.96425	0.81685	1.34076	0.929171	1.30478	1.52159	1.28115	1.26916	1.13485	1.0053	1.11694	0.866064	1.52689	0.988717	1.03568	0.796988	0.871229	1.16971	1.13922	0.921244	1.06809	1.21736	0.962801	0.755185	0.950027	0.894034	0.863119	0.967414	0.996522
620	chr2	122803167	123377687	1.09018	0.839352	1.25481	0.820378	1.04285	1.16889	0.522429	0.743901	1.19523	0.881867	0.99691	1.21838	0.944036	0.915565	0.926482	1.32216	1.50871	0.856155	1.15408	1.61043	1.15642	1.10083	1.02656	0.875407	0.987229	1.06269	0.891604	1.29349	1.19541	0.781048	1.17731	0.971542	1.16584	1.56413	0.688107	1.41233	1.2696	1.14223	1.16526	1.18288	0.684405	0.994199	1.18277	1.3431	0.912776	0.99505
621	chr2	123377688	123998569	1.19559	0.86196	1.21764	1.30621	1.16026	0.932149	0.663448	0.848419	0.786459	0.775716	1.2533	1.04679	1.01674	0.734233	0.679459	1.23802	1.45456	0.97483	0.989007	0.717514	1.26498	0.978556	1.15108	0.936387	1.19094	0.984404	1.34193	1.0692	1.18385	0.723166	1.13497	0.909947	1.05355	1.00451	1.01234	1.63614	1.22207	0.646695	1.04664	0.90131	0.961669	1.29318	0.868006	0.906216	1.13354	0.903314
622	chr2	123998570	124645714	1.01208	0.890113	1.03171	0.958913	0.982894	1.24924	0.944297	1.50661	1.09112	0.812445	1.01192	1.46795	1.04231	1.25721	1.38782	1.13247	1.4086	1.03175	0.877182	1.11732	1.04772	1.01571	1.31892	0.956932	0.905785	0.972634	0.758806	0.954987	0.876779	1.48452	1.03823	1.11349	1.25726	0.978985	1.5371	1.04104	1.34397	1.07118	1.17046	1.29664	1.33601	1.33644	0.849164	1.09028	0.933027	0.918048
623	chr2	124645715	125282154	1.41362	1.18176	0.959094	1.0549	1.07016	1.44512	0.560109	1.4518	1.01387	1.16007	1.04214	1.17782	1.19622	0.772426	1.22993	1.16873	0.964669	0.743497	1.21876	1.30085	1.30243	1.14342	1.73097	0.920062	1.05928	0.879278	0.962056	1.35737	1.28366	0.90504	1.03929	1.39296	1.16801	1.166	0.744584	0.980044	1.1273	0.787507	1.07762	1.32689	0.743481	0.972126	1.01213	0.900095	1.06473	0.801786
624	chr2	125282155	125898381	1.16366	2.09834	0.964668	1.248	1.0131	0.90066	0.951527	1.7474	1.15727	1.10124	1.20183	1.29823	1.13373	0.958242	0.942634	1.23021	0.404224	1.1106	1.22333	1.39858	1.23826	0.902189	1.1046	1.03853	0.906485	1.08164	0.870383	1.16469	0.974485	1.31806	1.24333	1.06182	1.21765	1.29794	1.22149	1.15257	0.827995	0.838219	1.22539	1.03078	0.83141	1.03329	1.07152	0.965063	1.06707	1.06244
625	chr2	125898382	126549317	0.782689	0.868126	1.04968	1.43292	1.09504	1.09684	0.979233	1.03744	0.882989	0.966035	1.28102	1.13213	1.10745	0.847069	1.03137	1.1891	0.94459	1.19327	0.933037	0.906807	1.23534	0.973614	1.06526	0.977857	1.02511	1.13819	1.3448	1.39603	1.14795	1.30058	1.14003	1.1173	1.25069	0.981703	1.10279	0.951429	0.743405	1.01917	1.11384	0.979588	0.846367	1.47901	1.28587	0.891662	0.895225	1.2378
626	chr2	126549318	127182281	0.762277	1.00959	0.785128	0.899327	0.89385	1.67794	0.770821	1.09688	1.75173	0.710945	1.40364	1.18063	0.999865	0.967449	1.28489	0.946978	1.12959	1.13305	0.891891	0.543477	1.06131	1.16926	1.35469	0.861375	1.3626	1.1714	0.687582	1.15153	1.21138	1.45998	0.972061	1.25841	0.998554	0.799848	1.20465	0.984182	1.01215	0.845707	1.19328	1.12836	1.2713	1.01746	1.00251	1.00269	0.933877	1.16299
627	chr2	127182282	127719097	1.37295	1.07253	0.914117	1.13719	0.868494	0.967695	0.996517	1.11576	1.14263	0.712574	0.789822	0.912787	1.26824	1.12798	1.27709	1.12679	0.743064	0.853939	0.887647	0.675316	1.37066	0.827378	1.11109	1.33337	1.19469	0.979889	1.14995	1.1117	0.810879	1.10311	1.10401	0.9674	0.92723	1.01569	1.21702	1.27188	1.07245	1.48627	1.05268	0.966994	1.17468	1.16911	0.71363	0.853378	0.885392	1.17098
628	chr2	127719098	128248568	0.914158	0.904474	0.99145	0.745986	1.07417	0.815105	1.02641	0.532549	0.894062	1.02268	1.61745	0.851297	0.864418	1.06027	0.762885	0.86835	0.937417	1.12987	0.864267	0.565274	0.76991	0.602061	1.07111	0.893646	1.02876	0.939986	0.970513	1.07572	0.838744	1.309	0.752993	0.959737	0.858761	0.942017	0.964047	0.561555	1.02164	1.02483	1.03215	0.813508	0.690555	0.755622	0.717372	1.37591	0.973288	0.797193
629	chr2	128248569	128804307	0.983686	0.76816	0.810436	0.982935	0.757908	1.15836	0.955529	0.695261	1.13867	0.775224	0.86137	1.11018	1.21469	1.03439	1.42637	1.04866	1.26185	1.0304	0.995646	1.09291	0.928122	1.40184	0.63434	1.08424	0.696367	1.09274	0.692106	0.466116	0.966909	1.16211	0.786991	1.11112	0.812574	1.73316	1.042	1.07791	0.85544	0.51059	0.966014	0.896894	0.690254	0.996014	0.888782	1.06552	1.01519	0.821445
630	chr2	128804308	129334972	1.15499	0.778024	0.855707	1.14808	0.98442	1.04383	0.971882	1.14203	0.754603	1.39995	1.21382	1.00362	0.864959	1.20235	0.956919	0.851358	1.35377	0.732744	0.77557	0.795397	0.856133	1.18825	0.967998	1.14608	1.64042	0.908411	0.800153	0.760871	0.806892	1.05845	1.0265	0.903688	1.21477	1.20185	0.727949	0.730855	0.781987	0.486824	0.957777	0.828491	1.20895	0.873688	1.15313	1.02342	0.887658	1.05787
631	chr2	129334973	129893529	0.988396	1.12026	1.12403	1.17823	1.05867	1.00958	0.721644	1.00556	1.4234	1.15474	1.41973	1.03954	0.696478	0.896869	0.884089	0.941069	0.838013	1.12948	0.76815	0.777081	0.9163	1.43017	1.19367	1.39248	0.891526	1.03777	1.0155	1.02206	0.935832	1.20247	1.21093	0.998921	1.01658	1.29244	0.995146	0.882244	0.847118	0.876071	0.976626	1.2446	1.21798	1.41062	0.777982	0.804847	1.20912	1.08029
632	chr2	129893530	130489798	1.29769	0.540614	0.891405	1.10495	1.25925	1.40157	0.9383	1.38265	0.918364	0.956146	1.21934	0.946799	1.42692	1.10917	0.999905	0.85806	0.811141	1.17125	1.103	1.27535	0.86651	1.17249	0.573076	0.804743	1.17978	0.951393	0.907353	1.15576	0.828239	1.25008	1.14056	1.0089	1.38032	0.81242	0.828741	1.0921	0.80601	1.06594	1.15635	1.24185	1.07058	1.00465	0.897103	0.939579	1.17547	0.944458
633	chr2	130489799	131034968	1.45775	1.07817	0.622985	1.40416	1.09176	0.958494	1.22827	1.44002	1.18888	1.49777	1.09973	1.25154	0.843565	0.982672	0.942346	1.11748	1.35346	1.29545	1.11082	1.00824	1.03284	1.05119	0.788572	1.14287	1.17849	1.11584	1.2205	0.851694	1.02696	1.01074	1.19502	0.74482	1.0464	1.44951	0.986988	1.27414	1.28904	1.36975	0.863852	0.920377	0.975896	0.809699	1.47154	0.812409	0.916293	0.972049
634	chr2	131034969	131489969	1.29111	0.773724	1.36005	1.26464	1.11211	1.1973	1.2043	0.614658	1.24791	0.930423	0.882809	1.15185	0.964973	1.08493	1.64139	1.27833	1.29497	0.562161	0.86034	1.10173	0.733464	0.779286	0.601232	0.885543	1.33835	1.07021	1.16921	0.58878	1.02149	0.679624	1.16452	1.04996	1.07075	1.38057	1.01507	0.60152	0.641984	0.747332	1.00287	1.14252	1.4119	0.868876	0.920974	1.06819	1.35172	0.740249
635	chr2	131489970	132045389	1.04615	0.811052	1.03232	0.769755	0.829379	0.880697	1.02598	1.01676	1.32199	1.47608	0.857094	0.970518	0.970519	0.978797	1.12687	0.750625	1.06443	1.23072	1.18837	0.665086	0.960711	1.09359	0.712156	1.1448	0.879923	1.12231	1.06694	1.24415	1.22103	1.83228	1.14747	1.10383	0.944118	0.986279	0.994237	1.22461	0.621635	1.04498	0.980318	0.978143	0.722059	1.02132	1.06215	0.823539	0.92462	0.785507
636	chr2	132045390	132624565	0.820438	1.03252	1.03282	0.810461	0.918907	1.09831	0.859122	1.04787	0.921158	1.15545	0.661607	1.04293	0.777387	1.26271	1.62077	1.45404	1.28682	1.13812	1.17059	1.41959	0.791996	0.867635	0.8886	0.821104	0.955282	0.938453	1.14424	0.755086	1.30513	0.928827	0.930853	0.56917	0.953639	0.830746	0.845642	0.797097	0.812833	0.692932	0.978307	0.897211	1.45157	0.855369	0.966608	1.06991	0.949917	0.944897
637	chr2	132624566	133106652	1.35342	1.45291	0.614475	0.962469	0.965496	1.11539	1.12169	1.02291	1.05979	0.971152	1.32786	1.07049	1.06497	1.07756	1.2344	1.00246	0.966658	1.16676	1.04088	1.45702	1.05618	0.989362	1.24756	1.04142	1.17869	1.17752	1.30393	1.28466	1.14846	0.743678	0.949654	1.4913	0.67648	0.891096	1.25853	0.775431	1.4631	1.36313	1.16273	1.12851	0.924928	1.2033	1.10712	0.860139	0.845239	1.1139
638	chr2	133106653	133646729	0.868809	1.12682	0.862773	1.09306	0.912222	1.16354	0.642261	0.916196	0.911392	0.621282	0.693764	1.20274	1.0648	0.949172	0.764371	1.11379	0.889569	0.882473	0.887183	0.828013	0.935348	0.893223	1.31849	0.979363	0.891297	0.908721	0.89332	1.26215	1.14833	1.30684	0.818676	1.07976	1.21512	1.18621	1.26535	1.14555	1.04336	1.15466	0.998075	0.972532	0.809413	0.533498	1.12573	1.01211	1.12849	1.32651
639	chr2	133646730	134222441	1.15298	0.797057	0.673344	1.35294	0.877373	1.25003	0.54153	0.899191	0.846523	0.706105	1.13324	1.24491	0.842694	1.11689	0.844417	1.20621	1.00731	1.11638	1.07529	1.23344	1.10565	0.99964	1.22722	0.828769	0.669063	1.11007	0.845201	1.25106	1.28997	0.917075	0.911769	0.917245	0.937076	0.934446	1.28336	1.20329	0.901656	0.98362	0.953768	0.952013	1.1037	0.876233	0.926813	0.721643	1.0009	1.01174
640	chr2	134222442	134764646	1.34915	1.02406	1.09325	0.873431	0.909898	0.997714	0.904977	1.2913	0.988116	1.30144	0.961746	0.74974	0.674512	0.841926	0.798715	1.08394	0.792091	0.86482	0.907574	1.00585	0.915951	0.969906	1.26449	1.20683	0.964	0.931858	1.35868	1.41312	1.09478	1.05945	1.07073	0.683458	0.901848	0.755203	1.32805	0.939865	0.974958	0.875476	0.829775	1.52325	1.19914	0.981148	0.552148	0.923762	0.896325	1.09028
641	chr2	134764647	135304965	1.08526	0.760885	1.34415	1.2014	1.17516	1.35617	0.927812	1.46637	1.32893	0.712944	1.13862	1.18992	1.5818	0.895578	1.03146	1.33754	1.36199	0.892557	1.10432	0.77688	1.05878	1.65945	1.11426	0.919013	1.22781	0.887181	1.476	1.06682	1.07659	0.922517	0.90359	0.822062	0.864041	0.784765	0.877915	0.96806	0.911959	1.21048	1.11716	1.4565	1.40452	0.850249	1.24319	1.008	0.993273	0.945488
642	chr2	135304966	135899815	1.10851	0.934215	1.40186	1.01844	0.782147	0.839428	0.909908	0.705377	0.915342	1.28129	0.678014	1.07165	1.08465	0.97287	0.839532	1.02453	0.796335	1.21167	1.45494	1.14605	0.949402	0.96827	1.07262	1.06951	1.2244	0.938512	1.39661	1.52992	1.09928	1.19626	0.910449	1.20595	0.926144	1.49872	1.41963	0.720915	0.894327	0.917796	1.20647	0.821288	1.37333	0.86435	1.19053	1.28262	1.20021	1.00175
643	chr2	135899816	136522587	1.15128	0.532939	0.828799	0.989696	0.8769	0.723582	0.755831	1.01514	0.98103	0.990246	1.25957	0.985328	1.05604	1.17607	1.06398	0.872096	1.00317	1.07863	0.703352	1.04036	1.01114	0.905086	1.30647	1.47021	1.21324	1.07377	1.19443	0.917833	1.2296	1.08739	1.09468	1.08179	0.935328	0.807871	1.00856	0.979802	0.724429	0.880524	0.922972	0.795975	1.04164	0.819324	1.20573	0.739612	1.22579	1.2234
644	chr2	136522588	137080316	1.08482	0.375793	1.30048	1.70069	1.29226	0.968179	0.833823	0.793911	1.31631	0.989878	0.704733	1.19541	0.994645	1.09309	0.942238	1.10875	1.03637	1.13089	1.14576	1.10257	1.10751	1.04701	1.27495	1.02023	0.90519	0.972744	1.08728	0.707579	1.04812	1.02624	1.07627	1.19329	0.757545	0.709901	1.20191	1.06069	1.0037	1.04228	1.34867	1.33544	1.29704	0.707377	1.15976	0.994024	1.16834	1.01649
645	chr2	137080317	137659284	1.13029	0.225122	0.901988	0.881961	1.06351	1.0275	0.980657	1.31073	0.994202	0.888723	1.13814	1.16099	0.616324	1.30826	1.12119	1.44727	0.988972	0.918767	0.99529	0.880507	1.02788	0.956669	0.801088	1.21201	1.47901	1.0371	1.02012	1.12282	1.19864	0.887436	1.1907	1.3238	1.33251	0.748935	1.80225	0.871319	0.982305	1.1659	0.957893	1.70202	1.03056	0.729937	1.44622	0.712242	1.12785	1.00282
646	chr2	137659285	138290205	0.907022	0.828884	1.54073	1.2895	1.15973	1.30931	0.745871	1.73891	1.01052	0.837261	0.739822	1.01848	1.40293	0.906363	1.66886	1.19089	1.30023	1.02382	1.35216	0.920093	1.03863	1.26339	1.05316	0.933995	1.07226	1.06055	0.813193	1.33718	0.995339	1.09652	1.17658	0.851278	1.23938	0.856966	1.33329	1.00709	1.06898	1.0574	1.04964	1.48213	1.17606	1.10976	1.20442	1.07592	1.31186	1.08585
647	chr2	138290206	138899521	0.989237	0.476258	0.742831	1.5819	1.31604	0.829499	0.940541	1.44691	0.854993	0.713089	0.673073	1.5945	1.24664	1.17188	0.992758	0.952635	0.839681	1.3059	1.10173	1.01727	0.81634	1.23852	1.35249	1.33874	1.46355	0.970734	0.895984	0.942765	1.05278	1.29582	0.778635	1.15663	0.958263	1.22619	1.25809	1.01462	1.18737	0.994595	0.794922	1.28753	0.858323	0.853851	1.02066	0.975511	1.12231	0.823559
648	chr2	138899522	139500158	1.01688	0.659661	1.12457	0.938884	0.926634	0.853501	0.945176	0.971947	1.07617	1.1472	0.858277	1.07368	1.45008	1.07611	1.34395	1.3219	0.843104	1.18858	1.07648	1.0519	0.962213	0.711283	1.05831	1.01935	1.03055	1.00194	1.16726	1.06898	0.978396	1.29677	1.0517	1.22179	0.753712	0.778682	1.37095	0.708105	0.650218	0.732724	1.12119	0.99404	0.862394	0.853802	0.835732	1.38826	1.1243	1.01322
649	chr2	139500159	140135867	1.20225	0.548488	0.675375	0.956631	0.929282	1.29404	0.631065	1.25669	1.21924	1.15299	1.00817	0.803906	0.937474	1.26061	0.77389	1.19398	1.14055	1.09698	1.13592	1.2787	0.98983	1.36573	0.994341	1.37486	0.934169	1.1481	1.01113	0.815363	0.89095	1.33204	0.869979	0.833814	1.17105	1.13923	1.00626	1.03585	1.26757	1.08293	1.2402	0.811557	1.10781	0.754729	0.894113	1.22324	1.03371	0.927145
650	chr2	140135868	140785949	1.05418	0.445006	0.958115	1.03668	1.31042	1.58107	1.27148	1.1121	1.38527	0.968786	1.07317	0.846938	0.941385	1.09513	0.967282	1.07577	0.899941	1.03203	1.01849	1.08965	1.32381	1.2844	1.00667	0.985206	1.02684	1.06264	0.940905	0.955081	1.00192	1.48464	0.96694	1.26814	0.977901	0.783392	1.34097	0.680806	0.96009	0.573922	0.867632	1.15527	0.824223	0.739274	0.990789	0.77882	0.813936	0.829261
651	chr2	140785950	141440323	1.324	0.841701	1.33602	1.1355	1.05749	1.0744	1.06978	1.09873	1.2245	0.822335	1.44115	0.901336	0.779107	1.13723	0.967878	0.721595	1.34623	1.05408	0.812413	0.810607	1.21184	1.17731	0.679658	1.07935	0.92419	1.02032	1.13448	1.52972	0.914988	1.19052	0.991587	1.33719	1.01064	0.919146	1.52041	1.08116	1.15625	1.10367	1.11938	1.08916	0.869857	1.0345	0.898716	0.922436	0.870273	0.978
652	chr2	141440324	142108722	0.992359	1.17148	0.929005	1.17944	0.772138	0.941937	1.0592	0.789513	0.728931	1.03501	0.895903	1.19134	1.21274	0.894808	0.891362	1.43753	0.867281	0.7833	1.12	0.620222	1.02439	1.37453	1.29917	1.06617	1.0919	0.920574	1.24856	1.30667	0.886915	1.17877	1.3125	1.14746	0.924561	1.4306	1.44074	0.770877	1.17742	0.881646	0.782151	1.18254	1.00758	0.90053	1.31193	1.36132	0.910793	0.924195
653	chr2	142108723	142764688	0.572607	0.774175	1.17862	1.30272	1.06638	1.42675	1.11212	1.03234	0.766839	1.02299	0.866401	1.18044	0.807315	0.844739	0.971412	1.20909	1.1556	0.573231	1.29434	1.02457	1.35775	0.997436	0.980625	0.867209	1.03994	1.10313	1.42334	1.19537	1.17198	1.09207	1.01373	0.748124	1.03144	1.20273	1.29986	1.8437	1.00215	0.886611	1.20003	0.893204	1.00988	0.953361	0.978047	1.07538	0.974788	1.06961
654	chr2	142764689	143423926	1.342	1.42655	1.68335	1.01073	0.845237	1.00364	1.19847	0.76958	1.18323	1.15425	1.46003	0.850928	0.815732	1.02655	0.734558	0.824394	0.757276	0.956259	0.994036	1.22633	0.978394	1.0975	0.947671	0.788382	1.02705	0.908449	0.928072	1.23173	1.11371	1.72782	0.86156	0.887674	0.938997	1.28085	0.632475	0.908953	0.899201	1.35084	1.12844	1.0623	1.19548	0.99129	0.962283	0.863781	0.955031	0.822522
655	chr2	143423927	144043797	1.1228	0.822286	0.861862	0.981113	1.17755	1.05786	1.11773	0.928401	1.26148	0.810231	1.21901	1.01967	1.00795	1.06382	0.988167	1.32792	1.33866	1.02606	0.904368	1.01875	0.984997	1.49272	1.20723	1.25455	1.23649	1.04045	1.01857	1.08513	0.906112	0.988239	1.20262	1.21344	1.25081	0.942244	1.16744	1.02814	0.85191	1.09504	1.03024	1.19747	0.846838	1.07249	0.810839	1.08458	1.01497	0.869025
656	chr2	144043798	144599655	1.18596	0.942203	0.929412	1.01002	1.07052	0.965065	0.994091	0.961362	1.38155	0.66046	1.14822	1.38068	0.826416	0.812059	0.730415	1.37499	0.673726	1.08163	1.32552	0.734381	0.968202	1.2567	1.10827	1.0845	1.04812	1.08951	0.807878	1.26912	0.744724	0.821482	0.956519	1.28632	1.12483	0.673453	1.24163	0.875013	0.955287	0.891466	0.816937	1.21385	1.27829	1.20409	0.961605	0.921284	0.999164	1.12174
657	chr2	144599656	145185520	0.920531	0.853456	1.10461	1.01722	1.01404	0.70881	0.728287	1.05503	0.850764	1.39476	1.22117	0.858894	0.817474	0.903057	0.944833	0.869553	0.953684	0.709722	1.0972	1.03942	0.906328	0.619698	0.694246	1.10388	1.31815	0.862976	0.953757	1.0503	0.978903	0.649012	0.858836	0.717804	0.979477	1.35695	0.70746	1.31711	0.886063	0.840533	1.0649	0.86277	0.854191	0.73962	1.1208	1.1317	0.959587	0.991523
658	chr2	145185521	145739007	1.1007	0.482473	1.08377	0.873162	0.851604	0.909068	0.315247	0.402134	1.40027	0.865562	1.34263	0.674378	0.799475	0.691343	1.07082	1.29169	0.740479	0.679764	0.891979	0.915564	1.00225	1.20026	0.891846	1.12014	0.726964	0.878607	1.13591	0.767966	0.679222	1.00037	1.04447	1.06941	0.876314	1.18039	0.702844	0.786999	0.985733	1.1343	1.03701	1.25118	1.03467	0.565358	1.0855	0.942729	0.735302	0.893396
659	chr2	145739008	146313042	0.566407	1.10605	1.06967	1.01208	0.85316	1.01305	1.02515	1.00501	1.31829	1.15303	0.851561	0.9593	0.434817	0.733639	1.51145	0.984377	1.28778	0.907696	1.03181	0.79003	0.947061	1.65843	0.835	0.962899	0.578308	0.946458	0.754692	0.6892	1.12099	1.32324	1.12831	0.958026	0.87706	0.633113	1.30957	1.24871	0.906242	0.956726	1.00842	1.04468	0.958324	1.13187	1.33117	0.859451	0.911765	1.1878
660	chr2	146313043	146935779	0.782392	0.547418	0.817009	1.03032	0.781515	1.02559	0.99451	0.898641	1.00013	0.853698	0.893624	1.65423	0.290182	0.97349	1.59856	1.03954	0.856023	1.14618	1.16773	0.938127	0.883612	1.08305	0.772212	0.974956	1.10011	0.987639	1.00087	0.916983	0.634543	1.49768	0.973837	1.03423	0.701672	0.917517	1.28676	0.941393	0.883294	1.06013	0.965645	0.858035	0.940947	0.923027	1.01023	1.06194	1.16907	0.96725
661	chr2	146935780	147576202	0.823412	0.504383	0.994047	0.978386	1.07413	1.12255	1.12951	0.93242	1.12405	1.08879	0.662414	1.1922	0.934253	1.11154	1.4366	1.25799	1.15238	0.851036	1.14143	1.07533	0.915849	1.13899	0.906	1.08557	1.07015	0.892471	0.971313	1.0624	1.21596	1.23341	1.01332	0.912156	1.22761	1.48939	1.19221	1.01931	1.06382	1.1487	0.898534	1.04777	0.995977	0.922112	1.00974	0.806388	0.9742	1.09205
662	chr2	147576203	148177701	0.821248	0.940345	1.19836	0.808077	0.799622	0.914363	0.884713	1.28915	0.847081	1.62061	0.940965	1.15899	1.03471	1.01056	1.15736	0.71459	1.32835	0.961201	0.995481	0.838747	0.797284	1.27096	0.836555	1.14087	0.822183	1.13147	0.568781	0.880182	0.775172	1.34243	1.03683	0.839632	1.03109	0.896982	1.23744	0.99427	1.21104	0.552766	0.8204	0.8863	0.979547	0.88097	0.917555	1.39958	1.07418	0.774411
663	chr2	148177702	148767873	1.16997	0.925402	1.06602	0.944812	0.997584	1.21527	1.12181	0.994686	1.52627	1.372	1.08167	0.955128	0.876709	0.928441	1.16002	1.45126	1.24013	0.987186	1.18103	0.915926	0.925332	1.18185	1.0693	0.800385	1.08085	1.14262	0.96993	0.781317	0.850728	1.49015	1.04561	0.864396	1.16763	1.30172	1.26804	1.10471	1.17678	1.02595	0.891119	0.792419	0.944372	1.11289	1.24943	0.79189	1.17791	0.993434
664	chr2	148767874	149395999	1.00893	0.68088	1.10759	0.993533	1.46195	0.94239	1.09608	1.10504	0.873124	0.961257	1.23087	1.26865	0.831576	0.9433	1.44343	0.711836	1.09297	1.35106	0.820415	0.974678	1.12075	0.956321	1.41848	1.40005	1.28777	0.975993	0.84166	0.76434	0.885167	1.17695	1.10001	0.723718	0.996374	1.08576	1.07975	1.43951	0.901237	1.13294	0.893769	0.926342	0.990806	1.33747	1.47775	0.96841	0.98732	1.00187
665	chr2	149396000	150051142	1.24211	1.38595	0.709111	0.80545	0.912256	1.43091	1.00596	0.763945	0.825654	1.03271	1.14691	1.25041	1.20226	0.882503	0.920171	0.930003	0.772108	1.51535	1.41424	0.827975	0.955103	1.04108	0.825394	1.17495	0.708165	0.91433	0.924054	1.23874	0.970612	0.88693	0.791207	0.754665	0.764848	0.683561	0.737396	0.915598	1.04606	0.933326	1.35235	0.888679	0.805048	0.877863	0.73799	0.821571	0.933531	0.908069
666	chr2	150051143	150624089	1.08974	1.10784	0.87308	1.19157	1.38562	1.16719	1.08477	0.972191	0.313169	1.18871	0.712589	0.988649	1.18951	1.14057	1.56458	1.05422	0.883961	1.08447	0.889544	1.10998	0.909003	0.967641	0.813983	0.769043	0.73142	1.0188	0.942283	0.915892	1.37274	0.917869	0.93599	0.8794	1.04446	1.05645	1.11359	1.28735	1.10453	1.20405	0.888402	1.34215	0.768982	1.01588	0.920013	0.93463	0.937581	0.926708
667	chr2	150624090	151226361	0.690597	1.40925	0.589457	1.01841	1.07982	0.865184	1.14458	0.944509	1.35966	0.899074	1.67985	1.30323	0.849535	1.04612	0.945932	1.01442	1.03589	0.905127	0.896021	1.04145	0.973735	0.743911	0.805358	1.01795	0.613007	1.03382	1.04336	1.20933	0.702173	1.45685	1.03545	0.904819	0.795773	1.13351	1.04672	0.891208	1.29081	0.82135	1.33456	1.06126	1.41476	0.967745	1.01186	1.21452	0.92045	1.3097
668	chr2	151226362	151773493	0.932044	1.132	1.19468	1.19258	1.05916	1.00264	0.915236	0.930423	0.888156	1.34436	1.23707	1.11333	1.63879	1.3023	1.24809	0.900122	1.17536	0.980232	0.863795	0.876804	1.00701	0.960207	1.17059	1.0788	0.90303	0.966185	0.839246	1.34633	0.858874	0.836431	1.03503	0.694447	0.862407	0.993133	0.931566	0.978582	1.17293	0.847984	0.930858	0.579739	0.692463	1.11505	0.941077	0.883647	1.0721	0.906075
669	chr2	151773494	152351712	1.25811	0.941266	1.38815	0.863555	1.08992	0.86578	1.22833	1.00975	0.594365	0.796576	1.03125	0.952271	1.3161	1.02196	0.730072	1.15971	0.88612	0.981348	0.902028	1.33769	0.824784	1.20985	1.78804	1.23584	0.7639	0.839497	1.20898	0.66161	0.960687	1.34578	1.06483	0.850117	1.20219	1.28257	1.10347	1.08211	0.487651	1.34283	0.991443	1.11992	0.935298	1.18967	0.771789	0.821676	1.007	0.924384
670	chr2	152351713	152904898	1.02196	0.529436	1.65636	0.849287	1.17707	1.31346	1.01457	0.996651	1.23633	1.15596	0.834643	1.19692	0.66497	0.829655	0.75191	0.985759	0.893161	1.31834	0.992643	1.1952	0.903712	0.945644	1.28771	0.93597	1.42018	1.03659	1.0933	0.978959	0.935374	0.967593	1.05693	0.827756	1.38485	1.09508	1.46834	1.51411	1.1593	0.822801	0.946742	1.03962	1.41817	1.16539	0.789837	1.21677	0.986763	1.00064
671	chr2	152904899	153459618	1.22276	0.917996	0.867311	0.858979	0.96209	1.18119	1.42341	0.959097	1.00848	1.13524	0.657481	1.10364	1.02255	1.07294	0.785218	1.07451	0.897757	1.18354	0.983138	1.01899	0.956187	0.981258	1.27287	1.1478	1.01687	1.16107	0.860884	0.725068	0.973789	1.02034	0.838275	1.03117	1.56156	1.50692	1.54841	0.417875	0.990006	0.887501	1.16338	1.2106	1.20845	0.964854	1.35729	0.841462	1.34034	0.854077
672	chr2	153459619	154054749	0.88023	1.06728	0.865465	1.15242	0.96842	1.01506	1.04717	0.983449	1.28114	0.918423	1.13513	0.873691	0.935324	1.15731	1.20479	1.23982	0.866108	0.822901	0.841896	1.15419	0.784567	0.981615	1.21501	1.44555	1.19582	1.12374	1.1761	1.64377	1.10523	0.988163	1.00083	0.883373	1.25991	0.92162	0.796075	1.34358	1.00406	0.856153	1.01457	1.14681	1.01044	1.34303	0.972173	0.937911	1.03501	1.10231
673	chr2	154054750	154696884	0.884358	0.671682	1.04852	0.729848	0.96795	0.873671	1.48635	0.847173	0.668746	0.716848	1.15341	1.32857	0.867769	0.777333	0.81445	0.886103	1.01588	0.895014	1.05231	1.01237	0.931534	0.998547	1.35935	1.36905	0.852696	1.08521	1.10762	1.10983	1.14436	0.85408	1.02648	1.11941	1.0917	1.28709	0.836126	1.07381	1.13039	0.593675	0.933535	1.13254	0.860821	1.19363	1.06102	0.91973	0.934963	0.835508
674	chr2	154696885	155350732	1.1708	0.991702	0.881334	0.639598	1.08935	1.18165	1.14543	0.994947	0.823696	1.55411	0.944498	0.965723	1.24337	0.866493	0.983944	1.20121	0.80791	0.74777	1.17688	1.03964	0.875809	1.04657	1.23265	1.21421	1.00196	1.03289	0.876839	1.04788	0.877503	1.43459	1.08579	1.1193	0.952883	0.753733	0.838818	0.816177	1.02422	1.08198	1.00793	1.10677	1.26764	0.939736	0.652301	0.961868	0.971841	0.766428
675	chr2	155350733	156010048	0.919928	1.09887	1.52316	1.10039	1.163	0.636008	1.21326	1.17027	0.926727	1.2857	1.38727	0.916419	1.0844	1.15883	0.892753	1.20974	1.154	0.921962	0.991917	0.888685	1.02179	1.28321	1.1749	0.811792	1.06643	1.05819	0.836332	1.05236	1.10139	1.3821	1.35684	0.896944	1.05097	0.944991	1.15082	0.82557	1.17541	0.971919	1.2388	0.982554	1.22726	0.608399	1.19535	1.28428	0.897089	1.06854
676	chr2	156010049	156677526	0.933982	1.43253	0.89106	1.22699	1.05644	1.14386	1.29322	0.677685	0.934871	0.922366	1.39836	0.842063	1.38509	0.686055	1.09607	0.914854	0.851241	0.953716	1.09248	0.837012	1.00578	1.17268	0.886051	0.780349	0.893454	1.03337	0.992647	1.47381	0.923794	1.37937	1.00284	1.31341	1.06156	0.39592	1.18192	0.600158	1.19072	1.10537	0.981864	0.733149	0.932676	1.10191	0.9638	0.77788	1.37137	0.865282
677	chr2	156677527	157291932	0.959238	0.852155	1.74968	1.24461	1.21801	0.805809	1.27735	1.33016	0.846816	1.38147	1.23992	1.04318	1.25842	1.16119	0.858937	1.08809	1.18576	0.875612	0.903909	0.732254	1.14465	1.01948	1.04025	0.970231	1.01496	1.16055	1.13712	0.845299	0.947979	1.26096	0.758586	1.1057	1.08598	0.947982	1.17378	1.63069	1.25222	0.933801	0.704812	0.816544	1.01046	0.858659	0.842508	1.24134	1.03825	0.769225
678	chr2	157291933	157906405	1.00695	1.00159	1.01146	0.978349	0.676303	1.07597	0.951085	1.15989	0.809471	1.12433	1.03729	0.753369	0.933026	0.980521	1.37611	0.942609	1.26033	0.702414	1.18433	1.23394	1.05129	1.53975	1.20049	1.10198	0.666277	0.874899	1.45407	1.24096	0.800253	1.32506	1.05686	0.859739	0.855608	0.708838	1.37916	0.879332	1.06036	0.934458	1.16505	1.03787	1.28745	0.955993	0.846245	0.920223	1.03446	0.969
679	chr2	157906406	158508422	1.07217	0.949556	1.44487	1.11888	0.729522	1.194	0.870596	1.23943	1.54944	0.804981	1.00726	1.14261	1.31806	1.15632	1.32989	0.721707	0.906617	1.00147	0.864962	0.661574	1.05897	1.5449	0.868269	1.30109	1.0066	0.997068	1.10412	1.39288	0.829041	1.35377	0.931037	0.97061	1.12172	0.870592	1.2095	1.01377	0.936724	1.00703	0.994106	1.15628	1.06197	1.24839	0.853786	1.08789	1.09682	0.786117
680	chr2	158508423	159062860	1.11219	1.54991	1.05405	1.10254	0.858856	0.918168	1.62867	1.18866	0.962964	0.877964	1.40894	0.893931	1.19342	0.849407	1.03057	0.921556	1.23813	0.74115	0.994426	1.13853	0.946404	1.32525	1.05483	0.789458	1.1877	0.979473	1.21821	0.679976	1.04772	2.10659	1.05635	1.25773	1.00525	1.39262	0.647053	1.47116	1.189	1.19117	0.928836	1.30321	1.26096	1.10763	1.13027	0.799076	0.921751	0.923965
681	chr2	159062861	159642040	0.764889	1.03276	1.07176	1.14323	1.02512	0.672956	1.19188	1.30987	0.779847	1.08216	0.804792	1.31319	0.8652	0.939549	1.37333	0.978936	0.844825	1.01443	1.10958	0.860837	0.84234	1.36448	1.27488	0.773041	1.19186	0.886708	1.10997	0.785303	1.00099	1.08495	1.09941	1.23684	0.866561	0.866851	0.857684	1.20282	0.658753	0.9349	0.84463	0.599929	0.937386	0.819152	0.946064	0.968262	1.04629	0.88156
682	chr2	159642041	160199310	0.953956	1.49999	0.755975	1.03909	0.809293	1.17291	1.21961	1.6182	0.754332	0.890751	0.669329	0.986477	1.32366	1.20054	0.991285	1.34304	1.12201	0.931298	1.08386	1.07044	0.791335	1.21353	0.657901	0.72445	1.29817	1.06106	0.768325	0.8829	1.00748	1.34159	0.836056	0.840527	1.04163	1.11039	1.16845	0.972648	0.971682	0.810304	1.03773	1.17155	1.23185	0.707351	1.19757	1.27468	1.06575	1.41638
683	chr2	160199311	160824850	0.995586	0.878713	0.972549	0.872535	0.97854	0.789109	1.01642	1.2799	0.876699	1.08178	0.945915	0.534347	0.86709	0.927468	1.28477	1.00404	0.66174	1.00367	1.15069	1.08662	0.968777	0.953656	0.748043	0.91845	0.756695	0.866771	1.04642	1.38123	1.17443	1.21081	1.09613	0.755242	0.957755	1.10493	1.84004	1.06348	1.14503	0.660197	0.937595	0.833871	0.857494	1.2433	1.08671	0.882147	0.893959	0.840662
684	chr2	160824851	161369693	1.08724	0.936288	1.4655	0.908233	0.800972	1.13755	1.17491	1.21034	0.773146	0.9308	1.11535	0.984824	0.78413	1.17496	0.749605	1.2473	1.2404	0.399453	1.14462	0.817688	0.809151	1.04646	0.836326	0.937693	0.936652	0.941574	0.896344	1.20075	0.819432	1.25283	1.02367	1.15573	0.926343	0.689743	1.01669	1.17229	0.852177	1.01957	0.818211	1.10057	1.19194	0.875016	1.22904	0.596096	0.739967	0.914372
685	chr2	161369694	161948721	1.14158	0.408305	1.53775	1.0411	0.967609	1.01421	0.772122	0.991778	0.840392	1.12712	0.981034	1.27264	1.20765	1.07783	0.854078	1.03526	0.685975	0.844675	0.743827	0.717149	0.920422	1.02083	1.00569	0.715605	1.02636	1.05352	0.776421	0.685719	0.937115	1.03659	1.05773	0.927334	0.779358	0.815203	0.888088	1.18323	0.803291	0.861213	0.93241	0.853931	1.01714	0.81667	0.781287	0.820008	1.06822	0.961941
686	chr2	161948722	162533747	1.06586	1.26705	0.709357	1.02212	1.18007	0.839786	1.02499	0.840732	0.868276	0.814593	1.3672	0.784413	1.02927	0.955104	1.37569	0.972392	1.02708	0.974775	0.886339	1.36255	0.775955	0.932138	0.735386	0.907989	1.15979	1.01833	0.982654	1.19815	0.930901	1.24776	1.15185	1.10375	0.918759	1.10585	0.806576	1.15674	0.966415	0.861464	1.0608	1.0886	0.972056	0.894352	0.886804	1.02787	0.857136	0.622226
687	chr2	162533748	163121885	0.967496	1.14294	0.901176	0.744917	0.847088	0.934242	1.33545	0.864868	1.0934	0.934896	0.856686	0.946065	0.80173	0.866474	0.817239	0.770559	1.41496	0.966719	1.07637	0.626889	1.00122	1.02938	1.0653	0.591655	0.69285	0.96488	0.769712	0.932877	0.948873	1.67521	1.08681	0.98356	1.032	1.25763	1.04343	1.12074	0.946077	1.06801	1.10473	0.666654	0.669897	0.871565	0.97778	0.855842	1.25155	1.03562
688	chr2	163121886	163720133	1.25072	0.739536	0.910318	0.887796	0.893619	1.12138	1.01081	0.858759	0.980307	0.96638	1.03415	1.19618	1.13542	0.944325	1.01796	0.821196	0.911818	0.677007	0.905471	0.734303	0.873661	1.0214	1.05784	1.0683	1.33544	1.09978	0.900187	0.821845	1.0104	1.13547	0.961512	0.933649	0.778101	1.59855	1.07235	1.15065	1.21819	0.84444	0.79734	0.954589	0.933287	0.640777	0.679366	1.05055	0.73356	0.8866
689	chr2	163720134	164318683	1.12208	0.749516	0.943716	1.43008	1.29496	1.45017	0.97588	0.922243	1.19338	1.05589	0.773881	1.00263	1.12453	1.11829	1.20606	1.13753	1.38751	1.09849	0.784597	0.871511	1.13329	1.14257	1.4396	0.850525	1.37449	1.06953	0.946347	1.0244	1.24176	1.65466	0.876396	1.0162	0.788599	0.983326	0.908755	0.997574	0.971786	0.784186	0.928415	0.917993	1.00746	1.31428	0.80761	0.940017	1.09756	1.04755
690	chr2	164318684	164918451	0.963832	0.910795	1.07897	0.788667	0.975485	1.22144	1.17879	1.02124	1.63279	1.02711	0.819557	0.817132	1.52633	1.02698	1.19718	1.19873	0.946552	0.979174	1.11116	0.83582	1.08573	1.229	0.918052	0.685702	0.993	1.09767	0.825018	1.03797	0.78575	1.25327	0.975113	0.854715	0.934013	1.67817	1.27856	1.04738	0.979601	0.841819	0.938989	1.3636	1.20047	0.807233	0.896299	0.962279	0.937229	1.02091
691	chr2	164918452	165555633	0.941164	1.04945	1.45726	1.37243	1.31203	0.983568	1.17793	1.02303	1.00952	0.966102	1.03054	0.843378	1.04959	1.08394	0.686362	1.25431	1.30241	0.721302	1.05396	0.869336	0.958082	1.35149	1.06485	0.852136	1.05738	1.11105	0.761104	0.617537	1.00873	1.20943	1.03906	1.20192	1.11253	0.744953	0.790787	1.2448	1.19239	1.2134	0.791205	1.13279	1.02579	0.837931	1.28807	1.0208	0.817964	0.973082
692	chr2	165555634	166160355	1.24105	0.909725	0.890662	0.997045	1.26538	1.0182	1.0424	0.810909	0.959555	1.05723	1.09511	1.06598	0.474742	0.712034	1.62134	0.894628	1.14261	0.88005	1.02179	1.11116	1.11013	0.828364	0.668366	0.79642	0.779812	0.89898	0.671845	0.997456	0.949244	1.49296	0.952786	1.07338	1.05334	1.55624	0.98233	0.738004	1.14217	1.50872	0.911447	0.88281	0.99406	1.44006	1.42833	0.751005	1.21538	0.898509
693	chr2	166160356	166760960	0.840222	0.593103	1.3502	0.848762	1.18474	1.27367	1.40736	0.75894	0.846497	1.09189	1.06934	0.585135	1.06766	1.00225	1.41927	1.31337	1.14099	1.33564	0.985643	1.22956	1.00957	1.02795	1.27477	1.49537	0.966515	0.993726	0.948453	0.970635	0.967611	0.97413	1.03559	1.4746	0.874355	0.9835	1.34595	0.95996	1.10851	1.07079	0.871858	1.18565	1.16769	0.899349	1.12282	0.780571	1.03373	0.917573
694	chr2	166760961	167384385	0.84238	0.909833	0.882234	0.896579	1.2063	0.891331	0.976961	0.754651	0.659766	0.674558	0.800954	0.832725	1.24536	1.18176	0.787767	1.11887	1.24986	0.911471	0.957567	0.848879	0.868091	0.961272	1.30078	1.43655	0.859777	0.933596	0.59447	0.977236	1.33527	1.21466	0.976933	0.938409	1.1084	1.09513	1.25929	0.856725	1.10249	0.781395	0.798665	1.01429	1.07536	1.23611	0.815397	0.648653	0.953374	0.901211
695	chr2	167384386	168043138	1.05776	0.761087	0.842846	0.906179	1.31587	1.30809	1.03999	0.571749	1.15796	1.36739	0.954161	0.957097	1.24783	0.866434	1.17686	1.39283	0.938844	0.689077	1.11323	1.18616	1.09051	0.902657	0.792944	0.838571	1.07163	1.13837	0.789786	0.950115	1.11566	0.839202	0.999742	1.20632	1.17558	1.19757	1.04284	0.832973	0.708874	0.835862	1.10787	1.1511	1.06004	1.22572	1.3798	0.834621	0.971557	0.786921
696	chr2	168043139	168676549	1.03976	0.852545	0.817615	1.19096	1.02842	1.20576	1.06525	1.44229	1.11413	0.786583	0.604205	1.01423	1.42082	1.04384	0.988312	1.51837	0.991408	0.947254	0.873948	1.05824	1.07644	0.927097	1.28107	0.513726	0.987005	1.07753	0.897622	1.07706	1.1734	1.48388	0.894248	1.28544	1.08434	1.22892	0.671254	1.15343	0.873958	0.688538	1.1266	1.3133	1.1	1.08985	0.845658	0.841236	1.09931	1.10112
697	chr2	168676550	169245870	1.35357	0.757643	0.813929	1.1068	1.12089	1.1157	1.28258	1.09244	0.955313	1.34666	1.21275	0.955079	1.24661	1.00389	1.73367	1.30699	1.19737	0.865991	1.08432	0.91204	1.28762	0.982814	1.40635	0.695659	1.2378	1.09529	1.0886	1.45763	0.571734	1.66999	0.97916	1.32435	1.32696	0.904482	0.435492	1.04189	0.969206	1.26838	1.4287	1.07508	1.03529	0.874978	0.945505	0.702146	1.35272	0.882058
698	chr2	169245871	169827795	0.87419	1.12544	1.09674	0.896582	0.784174	0.738436	1.2238	1.18026	1.01233	1.02172	0.957868	1.44403	0.986764	1.386	1.05818	1.20127	0.816683	0.934672	0.99754	1.51364	1.04429	0.817539	0.879697	0.86972	0.972066	0.807216	0.854472	1.17294	1.05385	1.32385	0.983785	1.34988	1.63357	0.969344	1.08829	1.32052	1.21555	0.555769	1.08634	1.20481	1.25709	1.32622	1.23578	1.12356	1.19866	1.09015
699	chr2	169827796	170444091	1.05667	1.66215	1.59425	1.22792	1.11531	0.955244	1.37164	0.63815	1.23925	1.08276	0.739341	0.53602	1.42346	1.17041	1.512	0.621601	0.889789	1.01213	1.11113	1.53309	1.03218	0.839338	1.20336	0.959332	1.34324	1.03771	0.919351	1.36718	1.25084	1.56692	1.04543	0.978425	0.890329	0.497158	0.680793	0.958446	1.00429	0.912208	0.91787	0.965803	0.969618	1.36073	0.949285	0.84302	0.903847	0.808283
700	chr2	170444092	171083939	1.20014	1.10701	1.2303	0.969552	1.07691	0.911347	1.44644	1.23392	1.56361	1.28579	0.907233	1.07425	1.26031	1.11941	1.42854	1.08526	1.09425	1.08458	0.859996	0.951148	1.12325	0.843126	0.925821	0.768823	1.46259	0.953289	0.943586	1.2495	1.19763	1.04946	1.0116	0.915256	1.06467	1.31182	1.14669	0.98895	0.610926	0.650366	0.72672	1.05761	1.29075	0.755867	1.01418	0.807614	1.02184	1.04541
701	chr2	171083940	171664143	1.28051	1.11572	0.80679	0.898095	1.09948	0.822707	1.11389	0.938537	1.16928	1.03284	0.820237	1.37983	1.60707	0.758201	0.798357	0.877311	1.22431	1.10305	1.06096	0.850366	0.968375	1.02695	1.33863	0.864452	1.24267	1.10459	1.08744	1.3683	0.897644	0.441867	1.07113	1.13	1.16327	1.42083	1.32561	0.853438	1.18049	0.845486	1.01463	0.883169	0.862306	1.06708	1.1995	0.944793	1.26046	0.982365
702	chr2	171664144	172256578	1.0646	1.00656	1.1828	1.16345	1.22068	0.963491	0.937464	1.07476	1.14126	1.10348	0.887945	1.16357	0.80367	1.30455	0.970437	1.30672	0.940122	1.38714	0.890893	1.46479	1.01717	1.22679	1.27254	0.876227	1.26351	0.913994	0.924726	1.49251	0.955075	1.37531	0.928026	0.618855	0.941995	0.430955	0.91521	1.0452	0.961132	0.964184	0.937371	1.36965	0.836691	1.37405	1.23438	1.14324	0.787448	1.00748
703	chr2	172256579	172837899	1.46474	1.46886	1.42306	1.1632	0.731044	1.20331	1.28531	1.01216	0.59187	0.767018	1.27497	1.31366	0.959555	1.23822	1.07808	0.653954	0.811946	1.3014	0.752874	1.28945	0.895976	1.42563	1.21575	0.755983	0.963644	1.02719	1.21733	0.899487	1.0484	1.43683	0.945766	0.677003	1.11794	1.07375	1.44923	0.867857	1.08487	1.06976	0.968533	1.0773	1.16144	1.25397	1.22953	0.913297	0.760265	0.981263
704	chr2	172837900	173373055	0.911341	0.789699	0.821817	0.99502	0.980713	1.05698	0.744499	1.25818	1.19737	0.769739	1.70428	1.12359	0.783032	1.14365	1.42425	1.0619	1.24638	1.6052	1.43125	0.992647	0.945129	0.754472	0.885235	0.70431	1.14445	1.01973	0.505384	1.09781	1.10239	0.702703	1.18512	1.06479	1.21354	1.23417	0.779368	1.10873	1.2991	0.909449	1.11165	0.983574	1.13592	0.973054	0.951629	1.15256	0.926839	0.934559
705	chr2	173373056	173922524	0.823238	0.79965	0.975259	0.848413	1.07048	1.19397	0.904917	1.25293	1.25605	0.668415	0.86282	1.13936	1.20217	1.24111	1.03407	1.08578	1.68241	0.926995	0.905838	1.03532	0.994378	1.17214	1.19031	1.11644	0.653637	0.870647	1.19941	1.37222	0.822524	0.882055	0.890083	0.648024	1.13454	0.977802	0.86295	0.983669	1.15342	1.38493	1.07517	1.30763	0.951706	0.775289	1.34628	0.988662	1.00201	0.980194
706	chr2	173922525	174488297	0.775213	0.89557	1.1454	1.23933	1.01738	1.23113	1.25254	1.0476	1.39126	0.887289	0.961315	1.22898	0.955458	1.28744	1.11988	0.69562	1.27132	0.957171	1.16537	0.923322	1.0026	1.10808	0.930721	1.30759	1.32776	0.987302	1.18172	1.69939	0.828034	0.754883	0.96868	1.10571	1.13222	1.58148	0.566265	1.09799	0.995385	1.36228	1.27203	0.750117	0.900281	0.904439	0.901999	0.987219	0.878554	0.976633
707	chr2	174488298	175042378	0.986215	0.425494	1.14439	1.20302	1.06742	1.04187	0.93534	0.796952	1.15325	0.959017	0.880095	0.652149	0.833243	0.923513	0.913125	0.991032	0.994418	1.09827	0.922377	0.890874	1.09152	1.16363	0.641808	1.01881	0.891572	1.11282	0.9545	0.858054	0.96341	1.64647	1.17317	1.29958	0.918848	0.8419	1.05231	1.07617	1.0723	0.896181	0.829657	0.976666	0.897032	1.2311	0.886893	0.716823	1.01238	0.927
708	chr2	175042379	175633749	0.583905	1.38151	0.577439	0.817664	0.712148	1.28838	1.37011	0.859016	0.973365	0.912235	1.06493	1.17677	0.743467	0.888809	1.02577	0.907741	1.2684	0.983578	0.823134	1.02827	1.00339	0.796033	1.33488	1.073	0.975211	1.01041	0.886304	0.768854	1.02141	1.3827	0.89001	1.10443	0.974428	1.05653	1.51916	0.933222	0.957475	0.864371	0.89672	0.981414	0.758239	1.06823	1.13258	1.12859	1.06774	1.09171
709	chr2	175633750	176213231	1.17086	1.29615	0.987776	1.44407	0.954092	0.838128	0.760573	1.28989	0.83352	1.14915	0.509117	0.868991	1.29837	0.92879	0.938136	1.48096	0.868703	1.3975	0.848313	0.580557	1.00356	0.703308	1.07046	0.88929	1.41082	1.02959	1.06401	1.35804	0.907138	1.28338	1.16375	0.897697	0.998683	1.21907	0.891334	0.765567	0.925049	1.02703	1.03764	1.20204	1.06221	1.02798	0.743698	1.23009	1.19854	0.816014
710	chr2	176213232	176781369	0.982137	0.89616	1.43448	1.43628	1.19376	1.19749	0.828265	1.15327	1.33454	1.17548	0.955553	1.41253	0.531905	1.20456	0.927895	0.996048	0.820719	1.29901	1.18156	1.15692	1.10025	0.854958	0.890472	1.23498	1.35274	0.895058	1.20696	1.14315	1.26836	1.75561	1.12128	1.02744	1.14527	0.680522	1.09166	1.29932	1.19264	0.783068	0.949284	0.896832	0.567667	1.02165	1.26366	0.848092	0.833134	1.19894
711	chr2	176781370	177396277	0.976391	1.14764	0.946866	1.5479	0.988838	0.949362	1.07718	0.886399	0.663903	0.880387	0.890582	0.836846	0.915294	0.926868	1.15948	0.696431	0.724193	1.35855	0.951722	0.923403	0.992133	1.04417	0.896475	1.24178	1.11024	1.01867	1.5634	0.85168	0.938807	1.42015	0.71756	0.620013	0.560157	0.781299	0.599619	0.755378	0.7879	1.12183	1.03332	1.00726	0.682205	0.701106	0.990414	1.05495	0.768122	0.953455
712	chr2	177396278	177924744	1.00469	1.12109	0.861317	1.633	0.810666	1.06657	0.827985	1.15346	0.874561	0.890336	0.604968	1.47016	1.06454	0.802782	0.7882	0.965801	1.03751	1.16489	0.818297	1.09383	1.23002	0.855161	0.778366	0.865458	1.56446	0.852128	1.07924	1.0582	1.02183	1.07913	0.899145	1.25956	0.908202	1.2341	0.874044	0.952899	1.01831	1.19794	1.1117	1.18632	1.26152	0.87578	0.831131	0.933418	0.916092	0.835957
713	chr2	177924745	178500109	0.966966	0.988142	1.19393	0.976455	0.825048	0.998634	0.505452	1.04992	1.19312	1.01886	0.964864	1.0431	0.936317	0.773018	0.870266	0.977577	1.31204	1.0805	0.900459	0.829889	0.963114	0.65224	1.09352	1.11374	1.37429	0.846204	1.17312	1.24182	1.01787	1.17394	0.946064	0.782166	0.974074	0.744747	1.25289	0.832012	0.745548	1.0797	1.00902	1.51356	0.96926	1.04752	1.12588	0.863703	0.882891	0.947541
714	chr2	178500110	179081684	1.39454	0.852741	1.07078	0.752582	0.824066	0.954521	0.79472	0.785373	1.46671	0.891318	1.2239	0.92497	1.21079	0.813931	0.914748	1.00954	1.0552	1.25185	0.959956	0.987826	1.1687	0.991992	0.801517	0.680053	1.22261	0.892411	0.952148	1.03296	0.981866	0.997703	1.10984	0.944521	1.18241	0.825455	0.999275	0.622104	1.31752	1.34217	0.738697	1.06894	1.03042	0.932117	0.887196	0.841952	1.00542	0.999336
715	chr2	179081685	179614332	0.966832	1.08209	0.968693	1.10241	1.00565	0.892748	1.02757	0.918678	0.761424	0.810541	0.924583	0.902974	0.855886	0.937324	0.700331	0.97848	0.85941	1.12494	0.925758	0.837423	0.864461	1.18037	1.48388	0.939141	1.01727	0.976406	1.15253	1.08709	1.08326	1.19312	0.925071	1.28575	0.88525	0.726741	1.16342	1.01829	0.909687	0.707863	0.94187	0.584302	0.976799	1.09294	1.02404	0.743814	1.10108	1.07827
716	chr2	179614333	180228551	1.12936	1.16163	1.00886	0.835177	1.05489	1.0335	0.999044	1.24295	1.06351	0.870539	0.866379	1.0531	1.17712	1.09495	1.05847	0.878738	0.775052	0.89298	0.885887	0.865541	1.30653	0.803353	1.01769	0.994048	1.01006	0.949256	0.998326	1.30418	0.997051	0.85461	0.874714	0.919525	0.999144	1.07322	0.91447	1.21972	0.963349	0.697906	1.1092	1.15979	0.875078	1.1103	1.09888	0.954863	0.808586	1.12721
717	chr2	180228552	180821137	0.84209	0.761263	0.936074	1.25104	0.757497	0.934471	0.672428	0.884059	0.891657	0.997494	1.03193	1.07411	0.800898	0.932726	0.857347	0.943303	0.781618	0.828968	0.995301	1.04155	0.990195	0.81685	1.11525	1.34054	1.30975	0.894554	0.86813	1.18646	0.886076	1.46325	1.03689	0.994795	1.15224	0.585184	1.63889	0.835188	1.23832	0.962008	0.862756	1.0834	0.653052	0.99483	1.06129	0.839776	0.855452	0.988219
718	chr2	180821138	181430318	0.896334	0.725513	0.958357	0.88752	0.973576	0.732939	0.87374	0.530518	1.19867	0.961514	0.82607	0.634486	0.948865	0.913377	1.06075	0.985937	1.33608	0.876858	0.988358	0.909603	0.881375	0.886289	0.83587	1.1022	0.981217	1.01262	0.670806	1.25906	0.782835	1.16418	0.793943	1.15968	1.13311	1.08041	0.685442	1.24725	0.841663	1.02635	0.924175	0.995113	1.16497	1.35012	1.11996	1.15714	1.09339	1.30894
719	chr2	181430319	182040107	1.28823	0.981887	1.24953	1.13979	0.594984	1.05416	1.11912	0.75193	0.958508	0.903826	0.860132	1.21224	1.01015	0.82888	1.05109	1.36155	0.860713	0.892567	1.07973	1.08291	0.747922	1.22901	1.14172	1.3185	1.01965	0.926522	0.546547	1.06698	1.02267	1.04119	0.978197	1.17537	0.997079	1.05049	1.20802	0.478335	1.17605	0.85795	0.727472	1.0591	0.770369	0.967922	1.07296	1.06925	1.05153	0.946062
720	chr2	182040108	182629546	1.1854	0.942767	0.706211	1.21754	0.881662	1.00433	1.10054	1.25665	1.06799	1.47867	0.755435	0.98569	0.727002	0.773502	1.07433	1.11723	0.912131	1.04873	1.01555	1.234	0.817678	0.867373	1.35102	0.998597	1.2333	1.06007	1.04694	0.692645	0.912766	1.24861	0.81101	0.795609	1.06382	1.38759	1.04058	0.676258	1.03709	0.951051	0.928909	1.06553	1.01032	0.631272	0.844994	1.04079	1.07924	1.10056
721	chr2	182629547	183214345	0.931573	0.730975	0.974452	1.00792	0.988892	1.09739	1.04841	1.00057	0.883016	0.747902	1.067	1.43421	1.07464	1.3396	1.0742	1.61181	1.33846	1.05978	1.225	0.792809	0.96081	1.12658	1.20725	0.976618	1.26651	0.962454	0.867904	1.12417	0.81407	0.987028	0.881108	0.839212	0.992665	1.02085	1.66905	1.02919	0.718001	1.35052	1.0032	1.17404	1.1094	0.985723	1.03442	0.852468	0.975017	1.0086
722	chr2	183214346	183814390	0.725397	0.938321	0.905954	0.813832	0.843991	1.02774	1.23423	0.990298	1.11505	1.29603	0.701598	0.879389	0.944477	1.09439	0.940632	1.0551	0.961627	0.908429	0.861184	1.22276	0.852724	1.31734	1.40405	0.997586	0.901398	1.02933	1.25797	0.951584	1.11519	1.18872	0.971687	1.42287	1.07917	0.80511	0.966316	0.835128	0.662532	1.03534	1.15103	0.78252	0.711234	1.09776	0.760693	0.798278	0.851122	0.925366
723	chr2	183814391	184443300	1.19245	1.6214	1.10455	1.09757	0.970935	1.22061	0.762938	1.34605	0.93574	1.2398	1.2517	0.886553	0.588539	0.682351	1.03074	0.898572	1.35115	0.580674	0.750724	1.27045	0.931491	1.05351	0.877022	1.22013	1.22624	0.962784	0.953746	1.12815	0.905044	0.892299	0.910575	0.905031	0.795829	1.13075	1.38127	0.503572	0.993494	0.779013	1.15009	0.788833	1.20763	1.1948	1.06605	0.747748	0.85965	1.00213
724	chr2	184443301	185119413	1.17777	1.04541	0.825737	1.09041	0.945178	0.983596	1.49231	1.08819	0.933448	0.978196	0.615504	0.909014	0.622101	1.39413	1.72439	1.12814	0.913269	1.12337	1.28555	1.14605	0.937849	1.04374	0.983805	1.18626	1.17837	1.1007	0.902749	0.825312	1.07928	1.08295	0.945262	1.2266	1.03791	0.974615	1.21279	1.02975	1.08995	1.39372	0.985058	1.11473	0.779489	0.801829	1.10197	0.961453	1.15004	1.34627
725	chr2	185119414	185776336	0.726328	0.932808	2.02424	1.20232	0.985163	1.65397	1.14161	0.697616	1.55171	0.965984	1.09388	1.08979	1.01427	0.945515	0.959455	0.660559	0.924663	0.869835	0.511373	0.775299	0.995293	0.749439	1.14298	1.09633	0.85441	0.978162	0.992202	0.951547	0.951616	0.983602	0.870987	1.0112	0.64859	1.07285	1.21074	1.39926	0.818696	1.088	0.731495	1.11668	0.808383	0.9881	0.991028	1.14178	0.991169	0.910394
726	chr2	185776337	186457007	0.647411	0.948041	1.13143	0.957181	0.937863	1.34776	1.16143	1.37521	1.01265	0.813963	0.872355	0.684443	0.856874	0.97091	1.01013	0.941731	1.45087	1.14825	0.960191	1.00324	1.03473	1.3443	1.20257	1.22718	0.714263	1.01383	0.860714	1.19755	1.038	1.26295	1.05839	1.02172	1.036	1.42711	0.483752	1.24209	1.12694	1.22725	1.11622	1.14506	0.940951	1.08487	1.21244	0.720621	1.13304	1.06192
727	chr2	186457008	187101844	0.956179	0.972894	0.897086	0.976812	0.715646	0.962325	1.08605	0.962453	1.05006	0.869352	0.635884	0.963144	0.58959	0.899021	0.853131	0.799618	1.15499	0.914909	0.877897	1.21247	0.983086	1.31466	1.07411	0.993313	0.924789	0.830508	1.11224	1.1964	0.873488	1.17131	1.12282	0.859858	1.12287	1.11705	1.24997	1.00149	1.17614	1.1429	0.9778	0.911482	0.899206	1.11154	0.755034	1.20746	0.913245	1.02506
728	chr2	187101845	187690034	1.04065	0.988928	0.743913	1.21983	1.17628	1.02366	1.0288	1.03304	0.797808	0.974637	0.756098	0.731606	1.32283	0.968119	1.0744	1.17421	1.14935	0.777286	1.13084	0.87953	0.934488	1.04773	0.971656	0.912192	0.892678	0.923016	1.07606	1.0012	1.04307	0.975368	0.925088	0.612198	1.06297	0.871666	0.503606	1.15412	0.762136	0.929317	0.520054	0.743207	1.06824	0.919016	0.784387	0.798996	0.898987	1.21044
729	chr2	187690035	188318857	0.816424	0.97258	1.06588	1.0904	0.910183	1.01137	1.27779	0.751788	0.723293	1.11385	1.11993	1.18162	0.967576	0.896219	1.42449	1.0375	1.01183	0.972805	1.13573	0.620241	0.929419	1.06359	1.07499	1.67131	1.00034	0.985718	1.32224	0.764233	0.80017	0.519248	1.00689	0.895511	1.1732	0.869378	0.522822	1.3667	0.930165	0.989619	0.840472	1.00102	1.32265	1.32647	1.12869	0.918576	1.18631	1.01917
730	chr2	188318858	188967314	0.7962	1.45934	1.39877	0.830628	0.992894	0.934231	1.27933	0.967658	0.680604	1.05518	1.03121	1.04222	1.03539	1.05939	0.922547	1.09498	0.662354	1.4102	1.02784	0.592249	1.08369	0.946371	0.694512	1.048	0.910974	1.08719	0.782828	1.26206	1.26285	1.72036	0.976151	1.14293	1.01517	1.18618	1.17731	1.44838	1.09608	0.953746	1.18623	1.07079	1.12641	0.819369	1.21526	0.781577	1.0688	0.950047
731	chr2	188967315	189597653	0.866473	0.643722	0.893354	1.00901	0.961556	1.27476	0.909511	0.767017	1.01027	0.886566	0.931078	1.01221	0.650428	0.802223	0.770875	1.2076	1.24355	1.08608	1.13174	0.778211	1.01896	0.863266	1.11441	1.06676	1.37401	0.823195	1.24222	1.0029	0.847853	1.0676	1.01091	0.977801	0.938042	1.08222	0.971745	0.985939	0.921071	0.872384	0.775825	0.721708	0.944065	1.01482	0.960428	0.942762	0.740573	0.975862
732	chr2	189597654	190194874	1.06959	0.709183	0.743775	0.616844	1.22823	0.677907	1.18856	1.06687	0.870767	1.1165	1.033	0.891049	0.642112	1.02829	1.071	1.1198	0.887779	1.01269	0.954133	0.907272	0.851981	1.04957	0.535653	0.915731	0.950768	0.835498	0.910487	0.911292	0.950818	1.81826	0.940505	0.819468	0.68129	1.17873	0.575561	0.66504	0.826058	0.946968	0.999808	1.02018	0.96704	0.864344	0.817076	0.944535	1.09101	0.837831
733	chr2	190194875	190809906	1.21172	1.19623	0.901808	1.00119	1.1017	0.815698	1.51169	0.659209	1.54749	1.26621	1.00679	1.10153	0.704311	0.805176	1.15536	1.05827	0.657839	0.972298	0.718423	0.769938	0.843341	1.04379	1.59129	0.915281	0.934891	0.930555	1.16706	1.22292	1.20888	1.05248	0.961526	1.00938	0.998118	0.91725	0.73455	1.14771	0.796959	0.930091	0.866694	1.12654	1.03605	0.789673	1.03665	0.860135	1.07081	1.188
734	chr2	190809907	191405676	0.863787	1.15384	1.30358	1.21096	1.14013	0.914083	1.18865	1.38988	0.936233	1.37523	0.581713	0.89816	1.05536	1.42455	0.93157	0.902799	1.00422	1.07962	0.949111	0.9781	1.10547	1.0926	1.26794	0.980675	0.789139	0.74989	0.970171	0.542297	0.768912	0.740177	0.932449	1.08314	1.12293	1.19023	1.07739	1.23815	1.50824	0.953868	1.21203	0.693634	1.10312	1.25766	0.896405	1.10008	0.998175	0.945086
735	chr2	191405677	191967137	0.77473	0.844197	1.02557	0.631891	0.986431	0.766664	0.827432	1.12853	1.07035	0.925692	1.16224	0.840553	0.950804	0.886883	1.32947	0.751494	1.42026	1.38123	0.580622	1.1659	1.07966	0.967371	1.68069	0.918585	1.21275	0.905766	0.644957	1.1265	0.921901	0.608568	1.14861	0.945865	1.18441	0.680421	0.835007	1.02105	0.810902	1.23598	0.80735	1.00107	0.704565	0.468316	0.494714	1.05589	0.809817	0.986869
736	chr2	191967138	192506509	0.999256	1.24036	1.53968	1.16184	0.681948	1.07237	1.00772	1.31257	1.18742	0.505099	0.971119	1.28536	1.16309	1.04408	1.07959	1.10276	0.809859	1.51217	1.29413	1.00645	0.982397	1.23218	1.13784	1.20856	0.864993	0.97036	0.80251	1.10985	0.839373	1.15502	1.26837	0.869629	1.01798	1.27492	1.26014	1.12634	0.844976	0.896688	1.06282	0.741484	0.943731	1.02015	0.852194	1.26587	1.09468	0.876264
737	chr2	192506510	193081809	1.18056	1.17298	1.07818	1.06267	0.684445	0.860932	1.04719	0.948891	0.823267	0.928242	0.885065	1.00662	1.02601	1.03281	0.771706	1.03686	0.902449	0.969946	0.979482	0.516638	0.94211	1.32649	0.755427	0.80739	1.30791	0.955501	0.925719	0.385722	1.26935	1.11481	1.024	0.752832	1.01943	0.834746	0.939263	1.29149	0.828133	0.905553	0.866392	0.933804	1.24004	0.679922	1.38297	1.20663	1.09528	0.981705
738	chr2	193081810	193742340	0.90221	0.801163	0.993481	0.883728	0.826601	1.24707	0.793499	1.13381	0.817091	0.935521	0.806518	0.876191	0.747704	1.0019	1.35502	1.24882	1.23869	0.992244	0.974446	1.081	1.00335	1.09103	1.00329	1.15809	1.03672	0.998953	1.30078	0.960894	1.03365	0.93	0.843217	0.843123	0.972035	1.34357	0.668836	0.792533	1.03101	0.983044	0.923812	1.08946	1.03274	0.901921	1.40047	0.922844	0.908455	1.16021
739	chr2	193742341	194427483	0.845714	1.16731	1.37991	1.13983	0.96393	1.03743	1.11441	1.05497	1.71982	0.999117	0.772071	1.17768	1.3513	0.709852	1.11128	1.24346	1.07249	0.818502	0.910125	1.28956	1.05095	0.889673	0.865825	0.616984	1.112	0.885806	0.716542	0.639581	1.22361	1.27812	0.92951	1.03277	0.735183	1.06189	1.21179	0.93451	0.708142	1.05459	0.727086	0.508665	0.972994	0.642813	0.858087	1.04834	0.951348	1.24564
740	chr2	194427484	195109836	0.618973	0.920246	0.749441	0.999121	0.866112	0.779191	0.915746	0.935861	0.94002	0.835757	0.861731	1.15566	0.89267	0.974281	0.9454	0.85867	1.25274	0.947202	1.12056	0.484736	0.95112	0.887645	1.42109	0.931999	1.39316	1.07976	0.743161	1.30303	0.858498	0.673445	0.976229	0.908002	0.86003	1.01556	0.545737	0.980915	0.781832	0.898235	1.03831	1.14909	0.847295	0.806362	1.52123	1.01032	0.755578	1.26918
741	chr2	195109837	195769820	0.958624	0.767286	0.568651	0.771433	1.02265	1.00084	1.34747	0.949801	0.904096	0.913696	0.934096	1.14746	1.05123	1.0578	0.955606	0.744834	1.15826	1.0562	0.831723	1.07245	1.04349	1.29381	0.936243	0.973385	1.17415	1.06448	1.18517	0.831914	1.12215	0.71619	0.941117	1.06597	1.01289	1.28739	1.15077	1.27281	0.841831	0.950511	1.02298	0.927371	0.969457	0.996428	0.782706	1.00823	1.10723	1.10154
742	chr2	195769821	196384189	1.13308	0.999668	1.22192	1.38826	1.14038	0.876182	1.14884	1.02351	1.24776	0.963143	0.457163	1.0144	1.11879	1.20806	1.02213	1.45741	0.787322	0.683663	1.07865	0.886652	0.979452	1.50141	1.15703	0.96226	1.07666	0.727583	1.19039	0.842473	0.875445	1.08762	0.734237	1.13381	1.03355	0.349202	0.785038	0.933276	1.14156	0.972446	1.06076	1.04741	0.992792	0.805739	1.00815	0.84771	0.716746	0.866626
743	chr2	196384190	196993055	0.773977	0.787407	0.988709	1.05439	0.999621	0.754326	1.16023	1.10616	1.06674	0.638787	0.986653	1.27584	0.632174	1.42484	1.07394	1.04601	1.15934	0.887724	0.757884	1.03999	1.10795	1.12011	1.14589	0.918897	0.690219	1.21415	0.970389	1.23578	0.812289	0.662526	1.08995	0.831267	1.06367	1.17872	0.891701	1.14985	1.45856	0.937007	0.965091	0.946933	0.825957	1.20038	0.922165	1.14739	1.19897	1.16191
744	chr2	196993056	197578321	0.9552	1.903	1.30971	0.941611	0.746833	1.43982	0.72325	0.710434	1.69585	0.996883	0.939865	0.754033	0.735543	1.13982	1.11494	0.995437	1.1362	1.01686	0.768597	0.855856	0.985973	1.43687	1.2229	0.953139	1.34053	1.10952	1.23769	0.791609	0.926571	0.874838	1.21777	1.42607	1.16851	1.22844	0.937172	0.732047	0.87331	0.698684	1.07393	1.00558	0.614241	1.04782	1.29281	1.16938	1.02252	0.78685
745	chr2	197578322	198147555	1.24878	1.73348	1.11101	0.77699	0.992698	1.13066	0.939912	1.23399	1.12493	0.929646	1.22918	0.731433	1.01186	0.851532	0.764097	0.840501	0.968775	0.914662	0.732276	1.016	0.875135	0.997214	0.921582	0.923921	0.914914	0.909346	0.743154	1.16359	0.989713	1.61428	1.06904	0.871517	0.94242	1.09254	1.50541	0.80872	0.984799	0.986206	0.851692	0.853797	1.17305	1.18234	1.09449	0.911405	0.830369	1.07685
746	chr2	198147556	198762589	0.83138	1.44678	1.02288	1.00436	1.0695	0.895286	1.31606	1.25009	1.02525	1.15069	1.20506	1.06792	0.689045	1.06909	1.09598	0.727607	1.33833	0.968799	0.954343	1.2421	0.996361	1.19088	0.866458	1.19914	0.983776	0.982899	0.668316	0.985271	1.19154	1.01926	0.96402	1.0593	0.817878	0.968206	1.39871	0.784645	1.07084	0.824176	0.594784	0.90294	0.803936	1.28956	1.25311	0.824793	1.07637	0.961245
747	chr2	198762590	199332897	1.2122	1.99128	0.888869	0.940426	1.07338	1.15023	1.20974	0.850229	0.704728	1.08536	0.678637	0.905341	0.736081	0.949235	1.89143	1.13233	1.18006	0.856643	0.735793	0.951592	1.01416	1.29364	1.12512	1.34297	0.713315	1.18573	1.17551	1.21907	1.23473	0.934319	1.03062	0.788836	0.812447	0.738774	1.51305	0.888815	0.905807	0.93137	1.16303	1.40862	0.78538	1.10974	1.00724	0.911884	0.605861	1.07516
748	chr2	199332898	199954409	1.21924	1.3955	1.18519	1.32443	0.906039	1.19561	1.03166	1.05365	0.764204	1.27492	0.938448	0.689017	1.2121	1.01083	0.862994	0.853158	1.02821	1.22287	0.990469	1.20249	1.00992	1.13139	1.05203	1.10205	1.23803	1.15711	1.13643	1.27647	0.902462	0.774403	1.05752	0.582796	0.763869	1.05329	0.862929	0.515044	1.17063	1.00932	1.02624	0.92139	1.03025	1.43867	0.744057	0.922139	0.896653	1.02254
749	chr2	199954410	200535472	0.913509	0.976921	0.952346	1.08176	1.07991	1.06489	1.37382	1.34615	1.07797	0.930292	1.29442	0.759212	1.11749	1.07947	1.21147	0.991661	0.800129	1.01642	1.25307	1.11085	0.943625	0.935375	0.88575	1.38537	1.40256	0.987662	0.679735	1.33057	1.0467	1.22232	0.828449	1.41185	1.21369	0.88401	0.978407	0.640107	1.30486	1.01062	1.27422	0.801443	0.894207	1.38705	0.884095	0.890822	0.976811	1.08785
750	chr2	200535473	201105347	1.05053	1.03534	1.11133	1.26542	0.944723	0.891263	0.934464	0.577211	1.70505	0.830258	0.985357	1.05424	1.17487	0.970269	0.878185	1.04862	0.694295	0.862166	1.09296	0.970163	1.04736	1.26835	1.32778	1.27414	1.08742	0.953936	1.04435	1.05692	0.944222	0.894286	1.19824	1.29328	1.08479	1.36522	0.804378	0.823214	1.10669	1.4359	0.989915	0.920234	1.04089	0.788568	1.00976	1.08481	1.10142	1.01194
751	chr2	201105348	201640817	1.27919	0.856321	0.790325	0.879853	1.1382	1.19375	0.974767	0.778364	0.767749	1.45106	1.22926	1.02051	0.883444	0.654838	0.935796	0.984944	1.22605	1.19997	0.919581	0.795935	1.19534	1.1092	1.30105	0.670215	1.11224	0.906877	1.05444	0.763924	0.88783	1.06599	1.02713	0.79585	1.09388	0.750866	1.13426	0.804658	0.938201	1.0319	1.21539	1.1575	0.993916	0.816442	0.904007	0.921511	0.794372	1.0321
752	chr2	201640818	202243835	1.18413	1.02744	1.20492	1.01111	0.9355	0.820825	0.99872	1.3369	0.976108	0.754477	1.61727	1.05057	0.931923	1.18947	0.811776	1.05504	0.937491	0.942686	1.01451	1.09141	1.0642	1.68616	1.28343	1.04852	1.49718	1.01006	1.08881	1.35151	0.79692	0.796262	0.964694	0.749857	0.763861	1.01721	1.00015	1.28049	0.927544	1.25938	1.04004	1.00225	0.998506	0.975826	1.41596	1.03452	1.21638	1.15496
753	chr2	202243836	202819225	0.890031	0.797947	1.05509	1.3565	1.15232	0.939685	0.940585	1.15058	0.642182	0.941791	1.0562	0.50599	0.913455	0.870262	0.514837	1.12816	1.02574	1.04328	0.633124	1.64692	0.937534	1.29411	1.091	1.30761	1.09985	0.86886	0.896879	1.18955	1.10424	0.731591	1.03396	0.628941	1.26308	1.09799	1.36751	1.34147	0.696193	0.817896	1.00284	0.877019	0.85118	1.34098	1.00301	1.03115	0.92127	1.29795
754	chr2	202819226	203379382	0.687183	0.845711	0.695328	0.569264	1.08788	1.45475	0.992392	1.04562	1.19321	1.18462	0.777899	1.06661	0.56222	1.03543	0.88463	0.889505	1.30649	1.12128	1.26754	0.998257	1.05058	1.06294	1.22036	0.669737	1.06382	1.02068	0.751569	1.15869	0.83678	1.27127	0.948629	0.967002	0.882775	0.735984	1.02138	1.00457	1.45742	0.831831	1.1351	1.12416	1.1349	1.1183	1.17408	1.06222	0.99165	1.01029
755	chr2	203379383	203988825	0.867578	1.0188	1.21652	0.961102	1.08478	0.896222	1.01328	0.92031	1.37578	0.972331	1.44078	0.56599	0.98305	1.44383	1.07717	1.21841	1.11035	1.21247	1.02469	0.917493	0.946355	0.883573	0.828496	1.1239	1.30685	0.97935	0.641026	1.44482	1.04757	1.28176	0.622667	1.09227	0.962709	1.013	1.40235	0.735596	1.18909	1.21559	0.98853	0.77114	0.725059	1.04937	0.972869	1.17781	0.69122	1.08896
756	chr2	203988826	204595178	1.0328	1.31553	1.06199	0.781705	1.09172	0.99925	1.17724	0.794492	0.852126	1.21282	1.30153	0.830142	0.833516	0.859151	1.23156	1.28087	1.03716	1.43473	0.862164	0.923626	0.996028	1.03776	1.05549	0.928623	1.53679	1.01391	0.986374	0.857137	0.699122	1.2407	1.06281	1.16112	0.73252	0.839999	0.838688	1.19618	0.983412	0.773036	1.05404	1.13284	0.834679	1.28987	0.916051	0.803574	0.906792	1.03745
757	chr2	204595179	205122691	0.914474	1.08483	1.34385	1.29133	0.878245	0.903471	1.04467	0.818404	0.76992	1.22214	0.698392	0.780853	0.884114	0.781885	0.796409	1.0716	1.47814	1.16722	1.01132	1.46449	0.872826	1.20218	0.965841	1.18908	1.17432	1.01782	0.703104	1.10292	0.908065	1.19938	1.0281	0.830981	0.811211	0.885531	0.638464	0.763284	1.14419	0.981917	1.12502	0.890232	0.869875	0.961985	0.904914	0.942332	0.795063	0.823701
758	chr2	205122692	205664049	0.725737	0.900219	0.93186	0.88951	0.918487	1.23797	1.17135	0.802232	1.25349	1.15661	0.92592	0.815125	1.0683	0.897825	1.1835	0.831537	0.984508	1.06097	1.07793	0.901098	0.992975	1.33639	0.949175	0.940296	1.16865	1.06643	0.844398	1.25403	1.19875	0.683352	1.17347	1.091	0.927416	0.897198	0.668828	1.30997	1.02559	0.757024	0.957265	1.11913	0.824511	1.03277	1.36481	1.03568	0.735595	0.82595
759	chr2	205664050	206248399	1.03077	1.29879	0.860786	1.01605	0.883606	0.872937	1.34514	0.773743	1.51578	0.873316	1.15299	1.44127	1.03385	0.93242	1.11472	1.08638	1.05615	0.96281	0.738966	0.897782	1.09051	1.26974	0.836097	1.08389	0.944977	0.934238	0.898038	1.30169	0.83116	0.973058	1.18226	0.62114	0.788044	0.781028	1.10398	0.755649	1.02388	0.900002	0.848383	0.665077	1.00936	0.881631	1.20595	0.779876	0.915403	1.01824
760	chr2	206248400	206775185	1.2538	1.0216	1.2241	0.87104	0.933222	1.02306	1.02394	1.30821	0.620714	1.12091	1.02487	0.867917	0.765625	1.13743	0.857063	0.673449	0.731523	1.06422	0.991081	1.16923	1.1887	0.928217	0.93576	0.991699	1.02901	1.01092	0.707681	0.875963	0.764571	0.813029	0.870566	1.07547	0.72446	0.803207	1.26338	1.2399	1.26606	0.997239	1.01833	0.789038	0.972398	1.70916	0.851828	0.755484	1.01026	0.897087
761	chr2	206775186	207360490	1.11697	1.21452	1.16282	0.779856	0.771791	0.88925	1.2044	1.14589	1.06817	0.951168	1.05622	1.17072	0.573253	0.828133	1.0028	0.908514	1.10766	0.976688	1.16798	1.2194	0.984571	1.19894	1.12773	1.04818	1.1308	0.724207	1.12066	1.08985	1.19506	1.37045	0.84264	0.783606	0.916409	0.840069	1.33216	0.927168	1.46589	0.509157	1.04024	1.02922	0.967208	1.38995	1.0381	0.840519	1.02747	1.1328
762	chr2	207360491	207937130	0.984313	1.07058	1.07113	0.639292	1.2176	0.794232	1.26492	1.12186	0.63427	1.05514	1.03345	0.707292	0.973881	1.04032	0.769036	1.0464	1.05382	1.04968	1.09156	0.953775	1.05593	1.213	0.917589	1.11022	0.915668	0.991065	1.05924	1.16112	0.799141	0.9578	1.13756	1.09446	0.987282	1.41926	0.951992	0.885316	1.38456	0.960873	0.919316	0.960003	0.837014	0.772672	0.993083	1.33189	0.992161	1.2374
763	chr2	207937131	208478443	1.12935	0.909992	1.41828	0.99974	1.05279	1.27977	0.624419	1.37543	0.913016	1.19441	1.11434	1.01235	1.34817	0.819523	0.506203	1.2787	0.514643	0.976781	1.01453	1.2738	1.02463	0.91867	0.97535	1.0546	0.985317	0.963735	0.924087	1.23864	1.16114	0.798253	1.13685	0.857669	0.85015	1.154	1.1589	0.999058	0.958994	1.05976	0.826683	0.705982	1.23858	0.936345	1.07642	1.16736	0.848793	1.02846
764	chr2	208478444	209044578	1.29939	0.876103	1.10898	1.11251	0.909436	1.07948	0.846112	0.730369	1.1981	1.03738	0.784583	0.820299	0.932446	0.995815	1.12869	0.884937	1.24812	1.37205	0.964522	0.894205	1.04559	0.787535	0.692938	1.01102	0.813384	1.07229	0.94769	1.18601	1.02087	0.984337	1.11698	0.887223	1.14897	1.0984	0.429023	1.24137	1.26909	1.20313	1.06454	0.956109	1.10419	1.32721	1.04398	0.798123	0.96943	0.980611
765	chr2	209044579	209665572	1.48372	1.20572	1.1484	0.858107	1.11222	0.774615	0.798985	1.06923	1.20806	0.958552	0.731825	1.13337	0.808159	0.80611	0.85259	1.10465	0.870694	0.890754	1.21319	1.19457	1.20393	1.18548	1.07438	0.888864	0.899591	0.779696	1.72098	1.23773	1.03747	1.03512	1.00576	1.02963	0.851871	1.30789	0.858654	0.895463	1.48763	0.823859	0.833741	0.947797	1.20958	1.05917	1.27812	1.12769	1.13863	1.07951
766	chr2	209665573	210327104	1.50493	1.18767	1.38625	1.03388	0.756589	0.918432	1.36162	0.999144	0.756901	0.99721	0.761652	0.963866	1.3109	1.06385	0.730322	0.988133	0.945062	1.25709	1.05044	1.47079	1.15813	1.46292	0.81664	1.00285	0.965161	1.02288	1.46924	1.20112	1.16447	0.712308	1.06798	0.965408	1.17143	0.824403	0.899987	0.671634	0.932695	0.879206	0.768951	1.02561	1.02225	1.04332	1.11849	0.96808	1.03501	0.989126
767	chr2	210327105	210935925	1.04272	1.12124	0.967948	0.985357	0.714018	0.906592	1.27732	1.14539	1.24794	0.941863	0.786312	1.24056	0.827955	1.19994	1.33133	1.14535	0.909008	1.1449	0.932203	0.966486	0.85225	0.839624	1.3177	1.11291	0.922627	1.12061	0.748104	1.30633	0.762061	1.14301	0.841705	1.1058	0.925128	0.947894	1.27436	1.11364	0.871038	0.832353	0.888086	0.890742	0.802418	1.00172	1.36531	0.700748	0.758698	1.00207
768	chr2	210935926	211557616	0.916797	1.21587	1.00529	1.19703	0.756837	1.0627	0.850569	0.846446	1.27818	0.97372	1.05984	1.32094	1.22493	1.00866	1.33237	1.002	0.514771	0.641169	0.992506	0.876867	1.05964	1.25879	1.14798	0.683291	0.859914	1.00807	1.0451	1.4262	0.987075	1.20927	1.08052	0.9187	0.941577	1.42513	0.973901	1.115	1.03047	0.786119	1.29067	0.842001	0.621904	1.2652	1.21508	1.01584	0.878485	1.05768
769	chr2	211557617	212201685	0.986031	0.929104	0.774676	0.726609	1.17833	0.876727	1.50124	1.32816	1.31827	1.02861	1.42962	1.1569	1.0704	0.896684	0.713785	0.815702	1.24886	1.04224	1.1157	1.32615	1.2709	1.12544	1.04386	0.991213	0.730586	0.963365	1.1171	0.995572	0.96087	0.681752	1.03681	1.14348	0.976799	0.870566	1.1132	1.12794	0.933813	1.28223	1.16046	1.11578	0.986557	1.07536	0.878104	0.976631	0.852367	1.20761
770	chr2	212201686	212847733	1.02638	0.907247	1.12541	0.892762	0.855514	0.774331	1.14548	1.06402	1.76585	1.11376	1.06034	0.802207	0.603469	1.06305	1.21786	1.12035	0.842617	0.745569	0.849197	0.982875	1.00351	1.04768	0.996744	0.85326	1.17065	0.765051	1.49625	1.18777	0.840231	0.771325	0.795545	1.02696	1.08912	1.27525	1.01654	0.735045	1.0721	1.3265	1.09901	1.26658	1.21087	0.991487	1.05993	1.01757	0.891959	0.95639
771	chr2	212847734	213494318	0.90163	0.869744	0.95996	0.776876	1.22544	1.42587	1.36582	1.34165	1.01345	0.645257	1.12485	0.842355	0.885885	0.951982	1.24428	1.08033	1.18535	1.02313	0.960087	1.00277	0.970421	1.00108	0.911026	1.33107	0.915142	1.00373	1.16524	0.945118	1.05564	0.483086	1.14973	0.758978	1.05558	1.03566	0.967757	1.3123	1.20519	0.916032	1.11546	0.893188	0.859457	0.793062	1.13533	0.876285	1.34514	0.994279
772	chr2	213494319	214086631	0.889847	1.05069	1.38644	0.795461	0.925128	1.19764	0.943011	1.0354	0.967136	0.841394	1.27989	1.07466	1.41124	1.12293	1.11704	0.960495	0.866211	1.19144	0.787702	1.13184	0.869025	0.913983	1.13621	0.808375	1.0254	1.01221	1.04869	0.930071	0.998493	1.18611	1.20265	0.840207	1.15154	1.17779	0.900491	1.38382	0.718923	0.93847	1.33236	1.00183	0.934475	0.782601	0.978613	0.852127	0.995091	1.19871
773	chr2	214086632	214727215	0.702589	0.813896	0.879206	1.0133	1.13782	0.786764	1.40539	0.780314	0.73775	0.866477	0.707369	0.778918	0.846699	0.976395	1.0554	1.27637	0.705641	1.16529	0.98453	1.31375	0.864879	0.700457	1.20799	1.02264	0.944028	0.903492	0.791658	0.683346	0.96253	1.27867	1.03726	0.840721	0.914635	0.765961	1.26929	1.32935	1.24708	1.04082	0.556745	0.918179	1.07382	0.859729	1.03571	1.02354	0.952302	0.916576
774	chr2	214727216	215339671	1.03221	0.777448	0.966771	1.01053	0.766458	1.11954	1.09174	0.769277	1.22493	0.798959	0.96321	0.987782	0.848029	1.08647	0.937958	0.741845	1.05959	0.758241	0.91376	0.75227	1.19499	1.44346	1.28579	1.09772	1.37857	1.06529	0.521799	0.559555	0.671699	1.0742	0.942352	0.765079	1.38877	1.31901	1.13727	1.06677	1.05726	1.14945	1.11444	0.748119	0.972923	0.963306	1.45684	0.961993	1.01349	0.969011
775	chr2	215339672	215951543	0.876645	0.854272	1.02542	0.9127	0.903607	1.1794	0.951787	1.07256	1.56499	1.20929	0.952812	0.917049	0.762921	1.10405	1.35233	0.599601	0.72684	0.939283	1.40344	0.824325	0.923823	1.17314	1.05583	1.2828	0.751415	0.963114	0.990669	0.600538	1.16215	1.25755	0.857487	0.974158	1.0376	0.876131	0.935879	1.11414	1.08978	1.12585	1.04995	0.724431	1.01789	1.30906	1.32768	0.678066	1.26803	1.01266
776	chr2	215951544	216518299	1.30016	1.53053	0.893266	1.26071	0.963321	0.955614	1.00789	0.723162	1.1043	0.798173	0.894142	0.884304	0.84552	0.755919	0.966074	0.908477	1.28909	1.30217	1.08807	1.12697	1.04421	1.03739	1.06285	0.590119	1.03293	0.951582	1.10769	1.13078	1.15016	1.1911	0.884215	0.724178	0.816539	1.1375	0.870397	1.02184	0.925962	0.62817	1.01218	1.20472	0.597055	1.12399	1.20522	0.805465	0.805888	1.06807
777	chr2	216518300	217059858	1.1434	0.976578	1.05787	1.13271	0.720756	0.971918	0.765681	0.939895	0.89679	0.635334	1.27914	1.19924	1.54166	0.820223	0.799178	0.96898	0.79865	1.15683	0.905224	1.00327	1.11646	0.913943	0.892787	0.900054	1.02748	0.877191	0.667603	0.514836	0.88182	1.14629	1.00263	1.05657	0.662874	1.20024	0.935443	1.66861	0.917157	1.04013	0.967503	1.20029	1.19666	0.985038	0.794815	0.730869	0.959026	0.83829
778	chr2	217059859	217563699	0.740128	1.49839	0.588383	0.880761	1.28779	1.38563	1.03302	0.735018	0.508274	0.82777	0.770484	0.919138	0.618654	1.23604	0.848897	1.03548	1.295	1.05857	0.990306	0.852122	1.10029	1.0153	0.720903	1.10801	1.18609	1.14004	1.00293	1.17323	0.852534	1.21391	1.09202	0.905172	1.20436	0.665325	1.3768	0.833621	1.05879	1.02097	0.728342	1.00903	0.884975	1.13964	0.759042	0.974169	0.964806	1.07042
779	chr2	217563700	218084158	0.999207	0.811339	1.66128	0.970611	1.01657	1.06882	1.03101	0.860464	1.15937	1.05492	0.916668	1.1741	0.706752	0.967902	0.9822	1.14567	0.674605	1.49804	0.867471	1.55619	0.91274	1.04216	1.36233	1.19448	1.20819	1.0546	1.17172	0.621195	1.04554	1.12493	1.01723	0.636226	0.870893	0.599805	1.04772	1.38464	0.992488	0.838492	1.20381	0.824505	1.14513	0.921825	1.03351	0.885663	0.86335	1.02277
780	chr2	218084159	218587933	0.824262	0.840493	1.34906	0.65927	1.16897	1.16196	0.912733	1.41367	1.18065	1.04698	1.25516	1.23648	0.889654	0.925333	1.33707	1.08619	0.550599	1.39108	1.03918	1.08093	0.997561	0.888751	0.927785	1.04059	0.894035	0.9456	0.603706	0.698481	0.849516	1.00223	0.797505	0.975626	0.865871	1.18955	0.646602	0.835526	0.744769	0.751317	0.761922	1.13376	1.09102	1.18562	0.966216	0.989011	1.06566	1.06285
781	chr2	218587934	219104607	1.16822	1.13851	0.700965	0.819816	1.1397	1.09098	1.07907	1.20405	0.926203	0.767067	0.909506	1.27321	0.931659	1.02506	0.878848	1.01118	0.733481	0.776373	0.776012	1.04574	1.07392	1.24235	0.915318	1.08983	0.663081	0.901087	1.19572	0.885639	1.45872	0.773366	1.08878	0.919694	1.20349	0.868133	1.00481	1.25487	1.01121	0.636177	0.759438	1.18902	0.937174	0.989938	1.03584	1.06857	1.05114	1.08551
782	chr2	219104608	219675654	0.735407	1.23745	1.12368	0.988586	0.905134	0.927864	1.29836	1.1083	1.39095	1.1	0.838586	1.02154	0.871763	1.14272	0.715893	1.019	1.10006	1.09119	0.835263	0.921471	1.15138	0.674516	0.640439	0.869475	1.21099	1.17198	0.834924	0.848339	1.25919	0.931952	1.17884	0.732003	1.28941	0.83293	1.1431	1.16254	1.21765	1.08856	1.00576	1.12415	0.987719	0.890253	0.852389	0.977483	1.17214	0.736976
783	chr2	219675655	220216779	0.951317	1.40348	0.856533	0.82447	0.359681	1.11522	0.641723	1.22827	1.18648	0.842139	1.20825	1.00947	1.26285	0.868633	0.934148	1.14284	1.34004	0.989915	0.773329	1.11563	1.04246	0.914835	1.21233	1.46965	0.738356	1.0951	1.16205	1.41082	1.23189	0.745099	0.994202	0.93104	0.968059	0.95156	0.963563	0.73936	0.954477	0.684209	1.17038	1.17328	1.0376	0.900371	0.9194	0.787414	1.21261	0.89896
784	chr2	220216780	220747118	0.660058	1.35577	1.33149	0.853359	0.551951	0.95549	1.17845	0.656999	1.32605	1.13351	1.04312	0.659105	0.951341	0.958298	0.875132	0.802537	0.907678	0.82766	0.807705	0.80813	1.07072	1.29698	0.846	0.999767	0.480753	1.18469	1.02607	1.14197	1.1607	1.11217	0.920964	0.645384	0.875042	0.841773	0.376369	0.980054	0.882145	0.812954	0.891012	0.852503	1.03833	0.675573	0.634132	0.86101	0.910186	0.807121
785	chr2	220747119	221294784	1.11903	1.24331	0.832959	0.897277	0.64956	1.25903	1.00571	1.06931	1.1616	0.963186	1.07986	1.06769	1.23231	1.17879	0.503693	0.905044	1.46912	0.996291	1.22679	0.889515	1.09233	0.985204	1.0208	1.05034	0.922963	1.1065	1.14559	1.07364	1.021	0.895741	0.941418	0.78889	1.25219	0.974387	0.388345	0.875096	0.843616	1.21918	0.90293	0.719722	1.36258	1.14261	1.25835	0.8684	0.675798	0.925449
786	chr2	221294785	221885611	1.27538	1.23391	0.69663	1.04667	0.930256	1.00543	1.20234	1.27612	1.47617	0.85107	0.75963	1.1326	1.03341	0.98014	1.16295	1.11786	1.29728	1.34644	1.07621	1.13454	1.14619	1.37353	1.10951	0.979063	0.935924	1.00456	0.653338	0.765413	0.934978	1.15404	1.00575	0.896137	1.22212	1.14081	0.781409	0.950655	1.0785	0.819662	1.03976	1.31014	1.00877	0.924163	1.30954	0.987488	1.20936	1.02299
787	chr2	221885612	222461365	1.00343	1.3778	1.26973	0.91571	0.970571	1.17319	0.976068	1.08441	1.12479	1.1541	1.03513	1.17013	1.36086	1.2461	0.943767	1.14077	1.01088	1.08405	1.15958	1.07947	1.17541	1.46471	0.995393	1.13947	0.396456	0.939296	0.872509	0.664933	1.20308	1.22167	1.1017	0.704062	1.04707	0.630394	0.945131	1.02173	0.984878	1.70786	1.02771	0.672652	1.17295	0.80757	1.00348	0.890254	1.01729	1.14148
788	chr2	222461366	223056810	0.813542	1.3959	1.00902	1.02368	0.91842	0.956204	1.0999	1.07015	0.940228	0.905945	1.34053	1.25197	1.13992	1.28509	1.05164	0.920285	1.47593	0.795336	1.10718	1.24236	1.11278	1.39837	1.21556	1.45552	0.778818	1.00648	1.03106	1.00328	1.04622	0.981783	1.08712	1.15635	1.29805	0.940056	0.950784	1.10397	0.996596	1.21449	0.942714	1.06796	0.54962	0.974	0.713496	1.09716	0.653537	1.03732
789	chr2	223056811	223645923	1.05115	1.39896	1.02752	0.714647	0.759139	0.744201	1.46232	0.895662	0.768709	1.18806	0.797713	1.11084	0.846918	1.18314	0.983123	1.01381	1.30998	0.926229	0.888842	0.955115	1.12572	1.01697	0.668912	1.03616	1.32865	1.11041	1.21431	1.06078	1.06202	1.1993	1.00498	1.62676	1.3139	1.54757	0.886414	1.4831	0.909147	0.903568	0.846803	0.781384	0.900828	1.02044	0.561357	0.856975	1.11684	1.33969
790	chr2	223645924	224244990	0.820053	1.03518	1.10669	1.10946	1.04	1.44291	0.841082	1.30988	1.03964	1.01942	0.970026	0.774063	1.30432	1.22229	0.467212	1.00443	1.41868	1.05059	1.0254	0.628936	1.03654	1.30717	0.953552	1.24223	1.29318	1.16043	1.21159	1.12252	1.08455	0.840522	1.05716	1.21816	0.937313	0.880383	0.992597	1.00189	0.684306	1.11639	1.0172	0.980538	1.43677	0.846694	1.19481	0.927596	1.08502	0.809011
791	chr2	224244991	224837838	1.0896	1.411	1.26239	0.995341	0.823735	0.794014	1.32029	0.847441	1.23803	0.977648	1.05512	0.747023	1.09805	1.34798	1.43711	0.609429	0.93755	0.916588	0.828984	0.859726	1.08773	1.38176	0.635158	0.817516	1.14098	1.22245	0.797597	0.979599	1.14913	0.798802	1.12081	0.792058	0.99028	0.910715	0.987363	1.42617	0.962761	1.63079	0.880811	0.953504	0.775169	1.08097	1.17569	0.882922	1.04517	0.964323
792	chr2	224837839	225390734	1.3479	1.02582	0.703747	0.789501	0.825076	1.21883	1.33471	1.01764	0.556632	0.909885	1.30024	0.961345	1.11591	0.99685	0.743537	1.16854	1.27285	0.981181	1.40094	1.02941	0.888448	1.05174	1.32931	0.790902	0.724777	0.8785	1.30183	1.65247	1.02087	0.75678	1.1327	0.797308	1.25712	0.689865	0.457652	1.30913	1.43655	1.35436	0.955146	1.11072	0.947631	1.09894	0.947759	0.766613	1.19243	0.839635
793	chr2	225390735	225979313	1.51348	0.621222	0.771713	1.04531	1.19717	1.31075	0.867876	0.959021	0.917669	1.13136	0.703826	0.802812	1.12519	0.976006	1.02886	1.0675	1.45452	1.14318	1.08583	1.04653	1.13699	1.01033	1.12721	1.12669	1.10095	0.923522	0.8962	0.891891	0.913391	0.639245	1.00048	1.25802	1.07131	0.887407	1.29682	1.03864	1.18963	1.21306	1.04689	0.929545	0.882735	1.13705	1.18928	1.28455	1.08826	0.98996
794	chr2	225979314	226574258	0.766537	1.28972	1.05427	1.18371	0.465249	0.879994	1.19693	1.02613	0.97652	0.833538	1.03723	0.594287	1.07599	0.96018	1.02661	0.885469	1.38934	0.778203	0.804248	1.05378	0.995639	1.07349	0.916374	0.856731	1.62583	0.906863	1.04778	1.18258	1.09805	0.929673	0.930433	0.726277	0.936841	0.995081	1.00075	1.1502	0.875709	0.82743	1.10831	0.85658	0.918108	1.49343	1.09541	0.939175	0.851985	1.06179
795	chr2	226574259	227179963	0.911845	1.1876	0.936534	1.11316	0.735243	1.27815	1.0819	0.962916	1.13537	1.02838	1.00513	0.963288	1.17687	1.04416	1.03097	1.04394	1.02393	1.12427	1.22572	0.8199	0.934307	1.40251	0.603594	0.918677	0.995403	1.02791	0.630149	0.890981	1.21945	0.871397	1.01624	0.966147	1.17147	0.706587	1.03273	1.0659	1.06682	0.820013	0.86479	0.707703	1.08085	1.18805	1.03468	0.832333	1.15457	1.06927
796	chr2	227179964	227734047	1.03125	0.405115	1.2986	1.00845	0.896	0.977322	0.971976	0.64678	1.5183	1.14928	1.02207	0.884566	0.986022	0.902781	0.827967	1.34845	1.24562	1.16896	1.08787	0.901366	0.940563	1.13133	0.769535	1.14906	1.06346	0.981416	0.727947	0.669879	0.920642	0.837856	0.928308	1.05307	0.880655	1.68436	1.19638	0.936106	0.838948	0.724676	1.10184	0.654678	1.03685	1.15225	0.813157	0.911296	0.80575	0.94788
797	chr2	227734048	228284248	1.21651	0.64408	1.96844	1.16907	0.722984	0.860071	1.45578	0.913024	0.775694	1.31697	1.0128	1.06989	0.763363	1.04939	0.733454	1.22148	0.8606	1.0063	0.922931	1.0191	1.07553	1.37604	1.31576	0.871576	0.830707	1.11236	0.764273	0.769952	0.872793	1.06395	0.977936	1.3353	1.09778	0.848305	0.94615	1.36821	0.812018	0.828386	1.09131	0.831081	0.835447	0.790684	1.22634	1.16973	1.31205	1.1588
798	chr2	228284249	228888784	1.21198	1.06669	0.974538	0.876017	0.745072	1.06191	1.18337	1.48766	1.43586	0.768436	0.965402	0.98949	1.27664	1.11503	1.22198	1.02673	0.840145	1.12673	0.634338	0.941566	0.994395	1.3655	1.15307	1.45691	0.746871	0.851805	1.13151	1.07174	0.880957	0.882224	0.822542	1.02361	0.899643	1.24435	1.0783	0.897928	0.975761	0.851578	0.967738	1.12115	0.675618	1.16223	1.07146	1.20347	1.06619	0.980413
799	chr2	228888785	229517674	1.27493	1.23465	0.919355	0.669876	0.863977	1.10021	1.07419	1.12733	1.06092	0.744039	0.549548	1.07926	0.946788	1.24587	0.730262	1.18936	1.59208	0.838523	1.1264	1.09801	1.20807	1.1781	1.31807	1.04678	1.44222	0.9336	0.715141	0.856736	0.942448	1.0927	1.19001	0.935651	1.14285	0.602573	1.58424	1.43144	0.994119	1.24992	1.434	0.9371	1.11894	1.13848	1.1191	0.909972	1.08008	0.876621
800	chr2	229517675	230092662	0.956869	0.825533	0.934173	1.04134	0.675359	1.46639	1.03232	0.767947	1.40003	0.948936	0.538862	1.02577	0.727104	0.983052	0.870186	0.834227	1.22301	1.26083	0.750136	0.931492	0.969607	1.13122	1.29951	0.860184	0.844003	0.993007	0.841371	0.729415	1.10377	1.44433	0.90571	0.962981	1.04302	0.82194	1.4986	1.16651	0.88825	0.893451	1.07218	1.06259	0.799854	1.04177	0.952268	1.52801	1.45437	1.24424
801	chr2	230092663	230641378	1.0476	1.19766	0.77895	0.99333	1.01703	1.03621	0.837023	0.705393	1.44494	1.19693	1.1361	1.45054	0.789414	1.0534	0.796997	0.998341	0.801161	1.01765	1.08671	1.16531	1.03734	1.40442	1.41064	0.843607	0.687613	1.07941	1.25991	0.812987	0.962017	1.32429	1.02891	1.02538	1.1768	0.582864	1.18254	0.938788	1.30651	0.859747	1.00623	1.06312	0.925568	1.01638	1.21997	0.98703	1.08111	1.04441
802	chr2	230641379	231237245	1.13102	1.29016	0.865922	0.876949	0.920111	1.34754	1.08494	0.940502	0.961289	0.821205	0.779549	0.857474	1.19677	1.18443	0.746197	1.08303	0.928979	1.0479	0.879078	1.08254	1.21069	1.32308	0.998598	1.00669	1.88381	0.988605	0.9741	1.4023	0.90298	1.46217	0.96744	0.999326	1.03393	0.772208	0.99361	1.52651	1.31175	1.16082	1.1309	1.24512	1.06138	1.01333	0.702116	1.06879	0.779011	1.00176
803	chr2	231237246	231801013	0.924018	0.977557	1.25826	0.998016	0.949848	1.0629	1.29763	1.20523	1.15031	0.980374	0.705426	1.00702	1.14805	1.05311	1.03235	0.984761	1.56644	0.827255	0.714998	1.08999	0.962219	0.832443	1.4085	0.798884	1.36288	1.1991	1.0424	1.11528	0.901465	1.17392	1.08607	0.966332	1.22675	0.872329	0.906066	0.872265	0.952076	0.993291	1.02112	1.04282	1.06915	0.709202	1.1411	0.838511	1.22768	1.01443
804	chr2	231801014	232338955	0.825996	1.25603	0.848387	0.931416	0.577601	0.992598	0.798641	0.718827	0.883697	0.901611	1.18386	0.870973	1.43253	0.996302	0.5865	1.18716	0.714887	1.16058	0.941473	1.01758	1.01203	1.36509	1.11104	1.17658	1.0295	0.73299	0.807082	0.841654	0.944173	0.726623	1.02295	0.912482	0.95648	0.805808	1.07264	0.888772	0.86462	0.967754	1.10584	0.776939	0.616277	0.963245	0.981143	0.692193	1.08692	0.998069
805	chr2	232338956	232932775	0.946419	1.27851	0.873873	1.01209	0.943857	1.06235	1.1136	1.15394	0.847719	1.27807	1.08644	0.804244	1.65632	1.03978	1.52713	1.15761	1.22204	0.886155	0.848886	1.47173	1.09177	1.05821	1.03685	1.0488	1.0914	1.11824	0.713195	1.4206	1.17366	1.39402	1.06955	1.03474	1.05504	1.11887	1.27851	0.617288	1.14701	0.993159	1.03075	0.88032	0.729269	0.59337	1.16863	0.954617	1.00812	0.98982
806	chr2	232932776	233477646	0.866289	1.58867	1.17374	1.27356	0.765398	1.14409	0.937096	0.893664	0.891845	1.16615	1.46125	1.17369	0.671575	0.880227	0.681262	0.789452	1.1758	1.07298	0.881562	1.00833	1.1437	1.31992	0.782091	0.885586	0.723684	0.995511	0.808278	1.04311	0.789368	0.962698	0.834585	0.813869	1.01662	1.35583	0.549993	1.27077	1.20048	0.767697	0.915882	0.754314	1.02979	1.19207	0.623255	0.882024	1.29903	1.07625
807	chr2	233477647	234100936	0.837537	1.03843	1.0796	0.981215	0.651798	1.35262	1.13237	0.857469	1.28308	0.56337	1.07517	1.1072	1.32866	0.919088	1.3776	1.13924	1.5379	1.5293	0.762144	0.738831	1.38545	0.866011	1.14905	1.27454	1.12094	1.13318	1.27838	0.696858	1.09487	1.30578	1.05881	0.573626	1.37523	0.642975	0.919722	0.938669	0.919752	1.34472	0.818157	1.2322	0.919947	1.17549	1.26565	0.827234	1.1433	1.06316
808	chr2	234100937	234655752	1.22198	1.35774	1.1735	1.04852	0.625752	0.847379	0.831116	0.957404	0.75918	0.935948	0.712421	1.1392	1.46778	1.02134	1.09621	0.762605	1.32833	0.670851	0.843983	0.644088	1.13081	1.25652	0.920137	0.99439	1.06853	0.975863	0.900466	0.896035	1.19504	1.17121	1.03008	0.954922	1.04308	1.33633	0.572127	1.18823	1.3589	1.19553	1.10333	0.863134	0.868931	0.952372	1.30833	0.769045	1.06817	0.897274
809	chr2	234655753	235196495	1.16917	1.25842	0.60074	0.72691	1.08487	0.867983	0.893502	1.08907	0.969093	1.15589	0.978428	0.952852	1.13043	1.07161	0.589356	1.14957	1.02447	1.04268	1.11077	0.980442	1.09927	1.13697	1.27764	0.851558	0.771543	0.944514	0.718336	0.532847	0.673964	1.16407	0.944021	1.02975	0.998268	0.876825	0.655203	0.976603	0.93578	1.17297	0.931977	0.763598	1.10115	1.30079	0.718054	0.778675	1.12255	0.989655
810	chr2	235196496	235733012	1.18327	1.06679	1.56873	0.914016	1.20837	0.769778	1.07818	1.31315	0.999319	0.890958	1.19508	1.01371	0.853113	1.01185	0.707663	0.84171	1.06565	1.04355	1.29931	1.16223	1.24788	1.20909	1.019	0.930122	0.585207	1.05316	0.950825	1.17352	1.39342	0.855508	0.99213	0.75289	1.06271	1.05042	0.748312	1.15982	0.912097	0.586274	0.894307	1.20366	0.815387	0.858646	1.02216	0.887449	0.968095	1.03814
811	chr2	235733013	236251506	1.08987	1.47962	1.25617	1.07617	0.901478	1.01191	1.2099	1.00204	1.1074	1.00492	1.26676	1.06867	0.819515	1.46961	0.536351	0.916665	0.982571	1.06059	0.939022	1.05967	1.0914	1.00915	0.877372	0.7001	1.12437	1.01536	0.80558	1.06194	1.16025	0.729304	0.944032	0.941585	1.06943	0.80046	1.27747	0.930678	1.28029	0.859194	0.828211	0.829098	1.03904	0.844111	0.772651	0.922048	1.28138	1.18313
812	chr2	236251507	236771372	0.913268	1.46056	1.58684	0.688189	0.921878	1.00873	0.948346	1.49711	1.29968	0.991125	0.821803	1.00996	0.951107	1.11138	0.554952	1.16457	1.3281	1.24856	1.49297	1.13226	0.889162	1.18906	0.705794	0.721309	1.01778	1.17289	0.703606	1.13638	1.15383	1.04154	1.00019	0.952057	1.18527	0.646708	0.427567	0.382935	0.957997	0.923168	1.39586	1.04786	0.937197	0.967316	0.931404	1.17013	0.960457	0.905876
813	chr2	236771373	237286131	0.896233	0.655218	1.5347	0.833787	1.07644	0.655778	1.11264	1.10882	1.34369	1.17104	1.26088	0.865463	1.06699	1.20893	1.38776	1.06088	1.02184	1.38289	1.05613	1.23096	0.915024	1.24028	0.879738	1.30464	1.11848	1.02883	0.824766	1.03735	0.748779	0.497589	1.12651	0.752307	0.722463	1.30087	1.04877	0.939728	0.980402	0.854421	0.863688	0.623559	0.953843	0.715933	0.888554	1.2169	0.864853	1.21476
814	chr2	237286132	237813589	0.999891	0.994237	1.35335	1.05323	1.24339	0.916617	1.37936	0.811035	0.692737	0.656465	0.766576	0.718532	0.969984	1.10454	0.852342	1.06724	1.25042	1.15863	0.802673	1.55922	1.14752	0.675334	1.15962	1.07845	1.06412	0.88095	1.37273	0.806309	1.02613	1.21451	0.82907	1.26734	1.33766	1.42079	1.49034	1.20627	1.28223	1.12718	1.02095	0.849612	0.751226	0.991608	1.42852	1.1339	1.19889	1.02559
815	chr2	237813590	238314369	0.734123	1.06693	1.34296	0.972132	1.07357	1.04009	0.886497	1.32852	0.970044	1.01249	0.73428	0.979336	0.987551	0.945101	0.984026	1.04938	1.00066	0.830535	0.688968	0.94977	1.0183	0.968798	0.950259	1.15286	1.38863	1.1012	0.941217	0.625317	0.761719	0.583635	0.771406	0.857934	0.882386	0.91664	0.753855	1.43997	0.826365	0.93983	0.954605	0.668054	0.847708	1.36533	1.1703	0.931641	1.16161	0.904507
816	chr2	238314370	238823385	0.882525	0.966934	0.940262	0.994753	0.792669	1.01977	1.0035	1.52094	0.604392	0.784656	0.978813	1.20594	0.896673	0.786453	1.06669	1.03741	0.795355	0.929681	0.810015	1.37985	1.15598	1.28792	1.23641	1.14755	1.03942	0.969081	1.06422	1.00163	1.22879	0.902466	0.965603	0.81775	1.24055	1.40613	1.24416	0.969647	0.709808	1.21773	0.635741	1.08064	0.841951	0.749642	1.22166	0.945631	1.05485	1.00572
817	chr2	238823386	239387602	1.21558	0.786001	1.07983	0.971487	1.0341	1.17439	1.29397	0.991368	0.730716	0.985767	1.34656	0.687559	0.635034	1.04759	1.28983	0.82869	1.26039	1.51625	0.878427	1.04508	0.985662	1.2157	0.876808	0.991284	1.10828	0.767659	0.992147	1.04171	0.89921	1.29548	0.890184	0.520392	1.09241	0.973768	1.33941	1.01421	0.733848	0.727553	0.726677	0.743333	0.502483	1.18409	0.934888	0.896523	0.765223	0.961377
818	chr2	239387603	239938038	1.04201	0.945001	1.14033	0.805501	1.05418	0.884151	1.15298	0.868824	1.24795	1.02825	1.27217	1.17519	1.18557	1.07719	1.15392	1.13005	0.784213	1.28061	0.911854	0.985255	0.917988	1.09072	0.593857	0.885061	0.855151	1.00259	1.04671	0.61557	0.90871	1.04381	0.876432	0.588956	1.05334	1.37525	1.1096	1.33414	0.493263	1.07737	1.06379	0.70911	1.06518	0.905343	1.17045	0.81164	0.984574	0.684838
819	chr2	239938039	240435760	0.81461	0.852424	0.680697	1.44238	0.915222	0.741961	1.29807	1.04883	0.981013	1.11178	0.608773	0.565161	0.80956	0.963565	0.624047	1.07066	1.0974	0.703947	0.831608	0.999093	1.03345	0.985676	0.515203	0.832155	0.978229	0.79759	0.919041	0.646702	0.925741	0.462009	0.944566	0.845524	0.868914	0.870989	0.946753	0.446295	1.20725	0.700971	0.734982	0.925255	0.863758	1.01778	0.818529	0.587545	1.37037	0.851853
820	chr2	240435761	240977634	0.92445	1.28073	0.954382	1.34924	0.697368	1.40975	1.38638	1.0123	1.1038	1.32405	0.527713	1.78983	1.41569	1.33478	1.52156	1.02055	1.45741	1.08251	1.10832	0.577025	1.13605	0.958774	0.976854	1.04144	1.02846	1.1528	1.02741	1.21883	0.803855	0.915518	1.23976	1.22535	1.24861	1.2814	1.34883	1.05056	1.20726	1.30647	0.926166	0.848354	1.10304	1.25346	1.10792	0.868895	0.928871	1.06224
821	chr2	240977635	241524375	0.687774	0.899233	0.876187	0.596403	0.621614	0.944276	0.974845	1.23244	0.764625	0.653141	0.731377	1.02029	0.905177	0.852121	1.31357	1.03963	1.15365	0.570006	1.07424	0.961947	1.24488	1.24147	0.903632	0.902203	1.31391	0.912423	0.989111	0.647697	1.09827	0.927246	0.881063	0.758032	1.12827	1.19974	1.03972	0.895677	0.945447	0.851903	0.950619	1.20539	0.937206	1.14952	1.34096	0.883182	1.39355	1.11916
822	chr2	241524376	242067515	0.718045	0.748149	1.12281	0.620818	0.64318	0.795583	0.848678	1.13284	1.23651	1.1996	0.725765	1.01068	1.2319	1.1081	0.252706	0.942079	0.706541	1.34174	1.23561	0.671629	0.864622	1.01106	0.993106	1.14014	0.823523	0.982136	0.864782	0.721328	1.18768	1.06808	0.977479	1.12067	0.857495	1.12835	1.07963	0.831451	1.23861	1.12612	0.835169	0.786719	0.926285	1.06043	1.109	0.840032	0.721332	0.672494
823	chr2	242067516	242612476	0.684284	0.437527	0.618251	0.884085	0.717803	1.00864	0.999651	1.09524	0.589922	1.13374	1.00357	0.971802	1.64491	0.713089	0.875225	1.08044	0.694503	1.22435	0.572047	1.30834	0.813123	1.12233	1.53155	0.866752	1.18614	0.987447	0.752372	0.727413	0.683001	0.582985	0.761281	0.847506	1.05506	0.842364	0.585617	1.32421	0.52943	0.497525	0.821112	1.05794	1.07171	1.15805	1.40995	0.785385	0.996753	0.984249
824	chr2	242612477	243199373	0.924658	0.603794	0.720366	0.927962	0.89297	1.01611	1.10265	1.75271	1.37328	1.2412	0.767328	0.876288	1.31216	0.869571	1.08294	1.12409	0.541689	1.16272	0.650983	0.669148	1.09585	0.982915	0.960303	0.688432	1.08805	1.07265	0.60213	0.754669	0.950172	1.33816	1.03877	0.515576	1.15863	0.915349	1.04708	1.22338	1.05748	0.934616	1.13067	0.77719	1.35219	0.874807	1.5062	0.968709	1.09499	1.01531
825	chr3	1	664580	0.924975	0.895815	1.0849	0.807339	0.715202	1.50139	1.13295	0.847614	0.802454	1.06099	1.00104	0.875912	0.56665	0.932158	1.20062	1.00073	1.01783	0.897377	1.07952	1.27536	1.00632	1.1481	0.975101	0.99835	0.945615	1.10075	1.16742	0.765906	1.18266	1.01142	1.20319	0.961958	1.05035	1.5634	0.803046	1.19313	1.13254	0.919929	1.07437	1.23204	0.623479	0.853603	1.17828	1.09993	0.975348	1.06867
826	chr3	664581	1304247	1.15032	0.547816	0.823046	1.32228	1.17106	1.42173	1.35588	0.780127	1.51406	1.55819	1.21522	0.957459	0.91116	1.00494	0.901443	1.17748	1.30108	1.1851	0.935437	1.26684	1.17638	0.673372	0.993998	1.2721	1.17735	1.11691	1.17918	1.12125	1.10431	0.55968	1.2353	0.690979	0.953342	1.17691	1.12616	0.62678	1.10268	0.872342	0.903012	0.969795	0.848614	0.723335	1.45516	1.15836	1.21569	1.13151
827	chr3	1304248	1944856	1.53745	0.821479	1.27108	1.13583	1.46031	0.842212	0.902077	1.41413	0.883278	0.997256	1.24391	1.03619	1.25102	1.16269	1.28728	0.698518	0.946805	1.51072	1.0533	1.29206	1.10759	1.2575	1.24239	1.26763	0.785241	1.04667	0.971429	1.54497	0.808165	1.28556	0.997102	1.07226	0.973358	0.784346	0.924594	1.1314	0.783414	0.772491	1.09266	1.03893	1.0837	1.01187	0.951803	1.00252	1.11673	0.882123
828	chr3	1944857	2583251	1.12505	0.670789	0.978431	1.28285	1.07496	1.08455	1.23592	1.68993	0.624325	1.27004	1.27873	1.13315	0.974225	1.30653	1.15555	1.22732	1.31572	1.04683	0.915319	1.03045	1.0866	1.25009	0.735133	1.08338	1.1779	0.995059	1.25771	1.068	0.990859	1.12747	1.11771	1.00532	1.15742	0.694674	0.834222	1.31238	0.693147	1.09264	1.02131	1.05426	1.06753	0.791061	0.822622	0.938649	1.01142	1.08608
829	chr3	2583252	3163485	0.984999	1.38392	1.15043	1.36246	1.10776	1.2682	1.37326	1.38365	1.13432	1.31018	0.774818	1.47587	0.695147	1.04072	0.996627	0.806511	1.18048	1.04957	1.63509	1.17667	1.04748	0.715055	0.696705	0.863764	1.43481	1.09207	1.34617	1.40927	0.975497	1.00087	0.886504	1.22427	1.32425	1.29215	1.0241	1.30415	1.12393	1.05665	1.09958	0.882712	1.02396	1.22849	1.02089	1.07759	1.25968	1.14036
830	chr3	3163486	3744260	1.29433	1.06764	0.753869	0.999366	1.14805	1.11091	1.33748	1.12182	0.721089	1.05724	1.09939	0.879189	0.767059	0.872661	0.540164	0.989671	1.0532	1.4904	1.3101	1.39743	1.10694	1.18366	0.957487	0.492913	1.28112	1.2378	1.0969	0.789189	1.22382	0.959371	0.938718	0.668758	1.15265	0.75522	1.08707	0.849405	0.694489	1.17827	1.1921	1.65693	1.08149	1.18025	1.57722	0.953232	0.995455	1.27045
831	chr3	3744261	4364846	1.41226	1.57553	1.86766	1.31673	1.41136	1.06421	1.22388	0.799259	0.920242	0.925876	1.11769	1.06119	1.44438	0.818904	1.01207	1.28948	0.902338	1.70287	0.997382	1.60993	0.897497	0.91162	1.39268	0.745408	0.972182	1.2286	0.981101	1.13075	0.977675	0.794044	0.983679	0.954579	0.966924	0.884687	0.870374	0.808921	1.04169	1.40128	0.982435	1.02139	1.13125	0.63402	1.11479	1.05981	1.19848	1.4168
832	chr3	4364847	4902871	1.25048	1.11751	0.927278	0.811581	0.860995	0.771212	1.02004	0.930275	0.713583	1.02221	0.763083	1.13689	0.804053	0.858174	1.28237	0.848426	0.732131	0.831449	1.08396	0.81167	0.950566	0.760107	1.05046	1.1687	1.23997	0.936065	1.47764	1.09746	0.946053	1.17098	1.07526	0.974054	0.918954	1.20319	0.876572	0.663923	1.17812	0.898764	0.973124	0.898226	0.911491	0.766211	1.34602	1.03636	1.32322	0.943291
833	chr3	4902872	5474860	0.905421	1.20586	0.908497	1.07797	1.1173	1.41672	1.38575	1.18053	0.960336	1.07202	1.41856	0.906091	0.817597	1.07484	1.14003	1.20907	1.05108	0.928913	0.871378	0.916571	0.777244	0.947641	0.998248	0.822113	0.630434	0.808195	0.694084	1.22491	1.01906	1.02391	1.1026	1.31498	1.12173	0.720843	0.964425	0.7123	0.934838	1.11148	0.940845	1.25899	0.933972	1.02915	0.887695	1.21553	1.15213	0.759405
834	chr3	5474861	6095681	1.31819	1.5332	1.16221	1.21002	0.961824	1.30651	1.1691	1.87552	1.03013	0.96624	1.72139	0.961128	0.641876	0.977966	1.31282	1.30429	1.10468	1.25698	0.806132	0.868158	0.838757	1.11818	0.989124	1.21159	1.28646	1.18002	1.12103	1.04511	1.1212	1.44835	0.828097	0.692196	1.19394	1.4532	0.669817	0.773623	0.795745	0.890082	1.17013	1.11763	0.793544	1.71298	0.744655	1.17744	1.08046	1.00404
835	chr3	6095682	6747718	0.940324	1.25538	0.782752	1.27196	1.21853	1.25128	0.67378	1.3662	1.02516	1.25392	0.847435	0.93092	0.96197	0.987882	1.20203	1.25943	0.749143	1.04049	1.15982	1.02242	1.07046	1.38197	0.590125	1.08426	0.859368	1.11137	1.16714	0.614242	0.965119	0.991776	1.0906	1.1394	0.845595	1.02422	0.67034	1.1534	0.81469	0.732111	0.916923	0.667371	1.06962	1.25747	0.782234	0.84066	1.19704	1.22643
836	chr3	6747719	7374319	0.895357	1.38532	1.24508	1.15461	0.801658	1.23241	0.846515	0.733745	1.29342	1.14244	0.792869	1.04937	1.51692	1.07448	1.11183	0.827087	1.03955	1.10455	1.31973	0.42699	0.919928	0.61225	1.12276	1.16865	1.56371	1.12201	0.898519	0.913823	1.2256	1.10091	0.992545	0.916021	1.38398	0.767579	1.19984	0.835132	1.27327	0.931154	1.05126	1.32105	1.12623	1.09841	1.04356	1.17759	0.970181	1.24341
837	chr3	7374320	7969009	0.903158	1.88426	0.662715	1.02925	1.40044	1.01571	1.13973	1.10352	0.760316	0.911354	1.50486	0.843301	0.852227	0.634282	0.967012	0.804307	1.40115	1.23172	1.08352	1.21614	1.07885	0.68444	1.47456	0.699309	0.991803	1.0308	0.914028	1.12808	1.10622	1.58733	1.09992	1.36291	0.92935	0.72545	0.772137	1.6122	1.31595	0.995345	1.0597	1.27469	1.34472	0.853969	1.17775	1.10321	0.800153	1.27486
838	chr3	7969010	8546789	1.18179	1.13576	0.964102	0.986834	0.857789	1.055	0.90409	0.853352	0.919726	1.36299	1.02421	1.60351	1.01597	0.975244	1.10696	1.05521	0.733462	0.693715	0.670613	0.72792	1.26805	0.842438	1.36586	1.17468	0.986202	1.032	1.08239	0.990201	0.985371	0.864625	1.03184	1.10554	1.14608	1.16204	1.14788	0.889806	1.1451	0.919445	0.886177	1.10557	0.900629	1.17049	0.712126	1.23579	1.05933	1.24691
839	chr3	8546790	9067456	1.03337	1.22583	0.871134	1.10741	0.796449	0.983775	1.11038	0.999728	0.856954	0.870288	0.918102	1.07988	1.02937	1.28073	0.549045	1.15629	1.19985	1.10477	0.942984	0.967881	0.822925	0.849141	1.11351	1.28482	0.581167	0.949771	1.12641	0.985229	0.902071	1.12884	1.05471	0.813624	0.805573	1.38535	0.877683	0.735385	0.820689	0.939361	0.903293	1.13544	0.96787	1.21907	1.09212	0.792385	0.980998	0.943407
840	chr3	9067457	9612225	1.29078	1.15375	0.967406	0.843118	0.805349	0.707496	1.22103	1.32763	0.912577	0.743294	0.8216	0.832866	0.815418	1.18783	1.15349	0.965247	1.08016	0.926183	0.941419	1.04638	1.04308	1.08282	1.23476	1.19573	1.01557	1.20274	1.00379	1.33965	0.90016	0.593232	1.07918	1.17205	1.00808	1.25783	0.953079	1.44581	0.817299	0.975054	1.1461	1.14504	0.972817	1.21256	0.940798	0.86521	0.614409	1.13819
841	chr3	9612226	10156806	1.37753	1.46089	0.722321	0.997943	1.01194	0.844732	1.33421	0.846346	0.854806	0.899766	1.17952	0.797408	0.868681	1.20268	0.957947	0.66797	1.10696	1.23391	0.807017	1.18162	0.905334	0.891003	1.12385	0.981843	1.2311	1.00277	0.934461	0.902433	0.897726	0.656649	0.806469	1.287	1.19123	0.889546	0.470659	1.17174	0.886108	0.851751	1.09415	1.14489	0.972742	0.873324	0.943897	0.830161	0.846318	1.31776
842	chr3	10156807	10660631	1.07065	1.01193	1.28576	1.07105	1.02661	0.717271	1.35225	1.05459	1.29478	0.843415	0.849417	1.22301	0.921636	0.667733	1.28549	0.741855	1.02287	0.789024	0.940467	0.961408	0.974501	1.41336	1.01377	1.00457	1.02914	1.07396	1.05868	0.52639	0.731935	0.963236	1.07959	0.894088	0.723133	0.425185	1.09143	1.19072	1.31068	1.06076	0.820888	0.994847	1.07024	0.899933	0.639163	1.0959	0.930274	0.928374
843	chr3	10660632	11160883	1.21054	1.03704	0.968892	1.22615	1.02978	1.26129	1.08784	0.664788	1.49927	1.27468	0.896771	0.84125	0.712985	0.957378	0.830997	1.16388	0.688218	1.14987	1.10415	1.06048	1.07276	0.825832	0.78553	1.08193	1.26237	0.974681	0.872301	0.615546	0.843016	0.992318	0.829135	0.989574	1.29757	0.595639	0.897599	0.76526	1.02326	1.36329	0.731197	1.16146	1.17037	0.998603	0.896585	0.859634	0.875512	0.893478
844	chr3	11160884	11701272	0.803256	1.27085	1.07303	0.677288	1.05939	0.860983	1.22115	1.59491	1.24148	0.855445	0.905252	1.14015	0.885795	1.16585	0.954952	1.5605	0.799628	0.943589	1.08037	1.32378	0.921694	0.972507	0.976123	1.12701	1.04663	0.969923	0.850217	1.03403	0.76772	1.3233	1.09439	1.32373	1.37222	0.761593	1.28759	1.11584	1.06643	0.97197	0.844728	0.904379	1.00847	0.91668	1.08248	0.979598	1.27984	0.736263
845	chr3	11701273	12267874	0.727684	0.970236	1.52257	1.28599	0.955062	0.967009	1.01486	1.05617	1.19491	1.0043	1.12182	1.06117	1.04303	1.16316	0.689424	0.973335	1.28476	1.30118	1.05795	1.0555	0.798433	0.950222	0.999982	1.22285	1.26373	1.14295	1.2946	1.53523	0.63255	1.16893	1.17287	0.923175	0.865657	0.864818	1.28216	0.932373	0.905859	1.14314	1.1748	1.44878	1.26289	1.03118	0.981506	0.930124	1.13564	0.978568
846	chr3	12267875	12824690	1.20345	1.76122	1.52623	0.977867	1.04185	1.24716	0.687357	1.29535	0.837412	0.783179	0.780132	0.806038	1.06512	1.2073	1.62057	1.17323	1.58394	0.857897	1.05615	0.744573	1.05935	1.24816	0.937414	1.03506	1.118	1.04059	1.07187	0.842647	0.780952	1.17684	0.768207	1.16294	1.44001	0.645855	1.98776	0.98659	1.11243	1.49311	1.01554	0.773412	1.02096	1.2835	0.941479	1.03743	0.884833	0.910021
847	chr3	12824691	13329740	0.863008	0.958968	0.860625	0.988867	0.868823	0.725479	1.1536	0.875124	1.36857	0.974152	0.880552	1.14705	1.23213	1.02226	0.972992	0.81856	0.78405	0.780465	1.52459	0.917736	0.983362	1.14421	1.39226	0.669693	0.88615	1.06483	1.36355	0.60541	0.827014	0.990756	0.843853	0.962913	0.720648	1.03738	1.32994	0.921898	1.21329	0.955425	1.35975	0.92488	1.27793	0.796098	0.838573	0.925217	1.38212	0.96872
848	chr3	13329741	13841545	1.27341	0.520732	1.0705	0.909998	1.24217	1.05784	1.15492	0.95829	0.98245	1.22858	1.46222	1.01935	1.19083	0.851925	0.687561	1.32298	1.09831	0.972307	1.14354	0.960542	0.982718	0.839753	1.29	1.35296	1.00847	1.01668	0.883318	0.593381	0.926909	1.04203	1.15637	1.11409	1.29244	0.926512	0.903318	1.17435	1.09591	1.2525	0.89669	1.11196	0.828715	0.886701	1.26604	0.882572	1.04485	1.20245
849	chr3	13841546	14388560	0.830249	0.898516	0.853582	1.25252	0.774924	0.893962	1.00188	1.24616	1.29225	0.450151	1.12439	0.778872	0.974201	1.14604	0.696069	1.12997	1.16119	1.2922	1.03397	0.989824	1.05369	1.07745	0.877957	0.985698	1.06373	0.931632	1.17406	0.93206	0.901274	1.21526	1.0512	1.15883	1.02504	0.801623	0.920241	0.97648	0.704426	0.960817	1.16863	1.02042	1.13813	1.41574	1.072	1.08446	1.0471	1.08749
850	chr3	14388561	14888348	1.34271	0.87624	0.761169	0.732331	1.29914	1.14159	0.713471	0.745308	0.789036	1.09788	0.764119	1.28628	0.825212	1.15844	1.28411	0.957272	0.85637	1.3876	1.10995	0.769493	1.00221	0.948675	1.04946	1.16805	1.18706	0.904499	0.717929	0.729719	0.774945	0.637479	0.896158	1.33406	0.809438	0.580459	0.669852	0.786916	1.34241	0.908887	1.03069	1.4091	1.23875	1.28646	1.51841	0.659662	0.953049	1.03669
851	chr3	14888349	15420259	0.868203	0.772552	0.881353	1.01701	1.02757	1.34578	0.803365	0.483434	1.8288	1.11729	1.06285	0.994949	1.41105	0.931127	1.00411	0.692403	0.94786	1.05562	0.778813	0.787171	0.971315	1.25095	1.35202	0.711956	0.893703	1.01015	0.94033	0.624766	1.31821	1.05207	1.17233	1.06646	1.09736	1.68044	1.14344	0.65511	1.2248	0.878221	1.33693	0.764815	1.07133	0.797552	1.22442	0.957515	0.867359	0.839137
852	chr3	15420260	15973454	0.84613	0.620771	0.937464	1.10643	0.83595	1.10295	1.07888	1.0577	0.851432	0.836592	0.76237	0.749445	0.677677	0.92511	1.64572	0.969794	1.11259	1.02225	1.23597	1.00233	0.819868	1.3102	0.892863	1.11852	0.903351	0.865197	0.903662	1.07332	0.86297	0.396612	0.923607	0.885308	1.25967	1.33392	1.18833	0.898972	0.828825	0.855093	1.21296	1.25277	1.07311	1.34518	1.12967	0.881541	1.10765	1.04458
853	chr3	15973455	16482719	0.872342	0.739145	0.904965	0.913035	0.671967	0.990744	1.0869	0.80536	1.06734	0.872111	0.795548	1.07161	1.28417	1.30122	1.17006	0.858361	1.08596	1.0149	1.05765	0.73711	0.875855	0.893001	1.31492	0.710326	0.789416	0.851861	1.17528	0.750015	0.921123	1.46161	0.94897	0.920461	0.827596	0.64839	0.903881	1.01926	0.728759	0.766756	0.611408	0.957158	1.24475	1.09612	0.926743	0.95433	0.998613	1.07332
854	chr3	16482720	17033660	1.17787	1.02179	1.13771	1.44513	1.06581	1.15032	1.01084	1.02274	1.5132	1.21239	1.1331	1.04047	0.87171	0.981551	1.53203	1.02958	1.12025	0.723285	1.51573	0.788531	0.948266	1.13684	0.761222	1.05769	0.709941	1.10584	1.49681	0.647226	0.911396	0.7848	0.922347	1.39093	0.811549	0.785786	1.12809	1.03231	1.18432	0.968044	1.23819	0.951519	1.27658	0.906147	1.09228	0.801203	1.04114	0.993812
855	chr3	17033661	17612527	1.12919	0.650523	1.0475	0.888873	0.94701	1.09402	1.42701	0.99407	0.974531	1.05686	1.20648	0.965395	1.17672	0.970993	0.57326	1.04861	1.10125	0.892997	1.18094	0.716166	0.751387	1.20469	0.87218	1.02318	1.06939	0.889905	0.998066	1.58932	1.07073	1.6683	1.00106	0.760713	1.08034	1.1143	1.26642	0.975417	1.1008	0.741248	0.853046	0.705871	0.724329	0.711699	1.09864	1.18314	0.929832	0.937626
856	chr3	17612528	18199498	0.84323	0.574746	1.34927	1.68817	1.11897	0.803186	1.01251	0.747924	1.38053	0.74008	1.26446	1.41787	0.911682	0.994089	1.29056	1.05699	1.0516	0.881276	1.20115	1.10882	0.977209	1.46895	1.15055	1.13702	0.944114	1.02621	0.880987	1.00062	1.02158	0.525167	0.934215	1.02184	1.20899	1.23108	1.28154	1.03623	1.13661	0.867401	1.04162	0.901555	1.04278	1.57567	1.0191	1.02119	0.981969	1.00255
857	chr3	18199499	18769694	1.08364	0.405385	1.41504	1.48378	1.34564	1.1628	1.20482	0.956541	0.924909	0.659536	0.84801	1.18023	1.15888	0.970091	1.07451	1.17371	1.06902	1.01218	1.19148	0.847305	0.809332	1.07913	0.939553	1.2525	1.32019	1.11052	1.19424	1.19508	1.32229	0.74115	0.986953	0.918752	0.821257	0.752067	0.738848	1.35404	0.975757	0.886643	0.827512	0.941017	0.947419	1.03533	0.578298	0.796445	0.718705	1.07764
858	chr3	18769695	19404742	1.42967	0.593965	0.900866	1.06321	1.20674	0.874919	1.33591	0.97381	1.09549	1.68335	0.948074	1.08563	0.73465	1.10211	0.903236	1.11317	0.825644	1.20066	0.959005	0.656063	1.2265	1.33159	1.02893	1.0147	1.32649	1.02178	1.18459	1.39884	1.15358	1.44153	1.02486	1.19853	1.0324	1.29732	1.1443	1.00045	1.3683	0.930282	1.24362	1.23469	1.04924	1.3068	0.839291	1.26554	1.21206	1.01618
859	chr3	19404743	20054714	0.885764	0.881108	1.18794	1.30092	1.26784	1.1723	0.980533	1.32721	0.882721	1.30994	0.763595	1.39494	0.667543	1.30218	0.987171	0.988314	0.995042	1.16484	1.12213	1.07198	1.12594	1.08927	1.07433	1.12586	1.55926	0.988004	1.03251	0.948902	1.09401	1.07649	0.78104	1.52768	1.08603	1.68752	1.03044	1.15118	1.31916	1.14412	1.2871	0.768457	1.06212	0.916024	1.01054	1.00238	1.09795	0.943274
860	chr3	20054715	20656821	0.953187	0.498166	1.0403	1.1108	1.12348	0.916532	1.19653	1.52412	1.06541	0.781706	0.792829	0.941268	0.94056	1.03771	0.903163	1.04441	1.33696	1.11036	1.10198	1.14772	0.904492	0.774271	0.949561	1.19813	0.903258	1.09124	0.901344	0.855892	1.10719	1.17011	1.07647	1.28986	0.964974	1.03313	1.06862	0.774756	1.00464	1.33768	0.859381	1.2347	1.44432	0.628157	1.45584	1.29437	1.23353	0.999198
861	chr3	20656822	21281199	1.24211	0.819584	0.929826	1.025	1.12069	1.18092	1.35255	0.986184	1.12985	0.871376	0.789436	1.17178	1.32278	0.908666	0.641165	0.920312	1.2619	1.10952	0.760101	1.11398	0.840818	1.07516	0.988166	1.34421	1.17302	1.10336	1.16105	0.999243	0.858725	1.01044	0.94378	0.980976	0.993642	0.702195	1.04891	1.08636	0.816266	1.16678	1.2111	0.884827	1.52224	0.778299	0.980313	1.05859	1.03682	1.12061
862	chr3	21281200	21873979	1.04197	0.315303	0.670288	0.754917	0.925132	0.781876	0.885888	1.28763	1.32125	1.03641	1.21145	1.23643	0.993332	0.795483	1.07451	1.11646	1.1482	1.41704	1.44682	0.876507	1.1097	0.929259	0.835171	1.08169	0.798242	0.985232	1.04495	0.771025	0.912564	0.936189	1.1324	0.94938	0.881343	1.02914	0.671681	0.955797	1.11125	1.06799	0.89763	0.891488	1.06583	1.00658	1.30114	0.975628	1.07805	0.916487
863	chr3	21873980	22486457	0.839482	1.06197	0.812066	1.06388	1.13855	1.16931	0.915842	0.89781	0.935469	1.0923	1.18726	1.12925	1.20472	1.01905	0.882055	1.04127	1.09328	1.37897	1.03322	0.931259	1.03643	1.03702	0.661488	1.10445	0.852955	0.997198	1.11798	1.49388	1.3347	0.802605	1.07736	0.741818	0.977212	1.14783	0.851558	1.00746	0.879463	1.22597	0.89838	0.759176	1.01502	0.651173	0.850328	0.917942	0.971721	1.0493
864	chr3	22486458	23112838	1.24827	1.18748	1.14996	1.02058	1.07448	1.12506	1.06278	1.24525	1.22572	1.0543	1.38577	1.33156	0.633137	0.986215	0.657241	1.22217	0.770361	0.983862	1.11495	0.85833	0.884033	0.863359	1.16312	1.25457	0.866466	1.15426	1.02287	1.2106	0.755926	1.13669	1.05935	1.13374	0.731775	1.17354	1.71206	1.68477	1.31293	1.3951	0.978816	1.02797	0.902415	1.08134	1.11262	0.88758	1.0485	1.38132
865	chr3	23112839	23689971	1.0988	1.71292	1.08523	1.07588	0.743338	1.26248	0.992369	0.688824	1.07488	0.966765	0.988538	0.757276	0.962685	1.08016	0.87558	1.21594	1.1053	1.25764	1.1352	1.334	0.881594	0.776615	0.988973	1.21199	1.40651	0.826668	0.872646	1.21248	0.874351	1.32136	0.84987	1.08835	0.885376	1.06865	1.09269	1.22277	1.109	1.11957	0.785015	0.813072	0.702112	0.915577	0.868831	0.950748	0.979014	0.782451
866	chr3	23689972	24242283	0.825372	1.47766	1.22303	1.31378	1.14468	1.31823	0.88651	0.918463	1.36701	0.721523	0.990212	1.05969	0.753786	0.944926	1.38358	0.67685	1.31621	0.91216	1.19291	0.890974	0.933091	0.729673	1.00143	1.22851	1.20496	1.0068	0.822175	1.22924	0.947756	0.65858	0.744313	0.975516	0.778395	0.79901	1.15061	1.4043	1.34144	0.749709	0.756791	0.890838	1.25079	0.740295	0.870672	0.665096	1.15086	1.16228
867	chr3	24242284	24803087	1.06259	0.973291	0.910536	0.914829	1.00086	1.13151	0.943793	1.36499	0.743336	1.56599	0.923238	1.33532	1.19519	0.929733	1.25518	0.610559	1.07759	0.85514	0.970728	1.22491	1.2558	1.28163	0.999548	1.39311	1.47005	0.970192	1.47166	1.36078	1.09513	0.704087	1.05888	0.831338	0.979795	0.463777	1.13227	1.06617	1.20692	0.961263	0.965656	0.896406	0.884713	1.00127	0.951889	1.10639	0.996139	1.13119
868	chr3	24803088	25384262	0.589112	1.34686	0.974752	1.03037	0.932937	1.16405	1.25406	1.07491	1.29962	1.09525	1.15247	0.963838	1.12145	0.971108	1.19568	0.941041	0.778051	1.16705	0.802373	1.29131	0.925367	0.872632	1.31441	1.46646	1.22071	1.12216	1.12834	1.06273	1.11347	0.776395	1.34324	0.961766	1.03011	0.91283	1.0842	1.31583	0.774268	0.882403	0.944854	1.06293	1.35063	0.997722	1.13517	1.24725	0.951401	1.03114
869	chr3	25384263	25919453	1.25748	0.719382	1.32544	0.754713	1.13966	0.759976	1.08163	1.32142	1.28648	0.988265	1.21817	1.18612	1.18763	1.00515	0.413056	1.17909	0.852378	1.04136	0.572108	0.67299	0.878553	1.06187	1.24243	1.17773	1.15773	0.802422	1.0771	0.873947	0.601013	1.31309	0.926062	0.753016	0.852729	1.58534	1.15237	1.09319	1.26696	0.842442	0.958686	0.627333	1.03417	1.14175	0.80616	0.887279	0.906072	1.02861
870	chr3	25919454	26522699	0.968089	0.417639	1.25864	0.713237	1.29819	1.26329	1.37195	1.31084	0.548832	1.1715	1.29247	0.99024	1.00422	1.23997	1.29384	0.951281	0.701035	1.13151	1.14231	0.910996	0.974122	1.17123	0.993934	0.825932	0.717436	1.04047	1.45422	1.27378	0.69298	1.44085	0.958112	0.948425	1.21745	1.08898	1.454	1.09121	1.05967	1.01344	1.07228	1.19761	1.42678	0.971507	1.03085	1.04207	1.09584	1.08136
871	chr3	26522700	27126398	0.840652	0.544284	0.615277	0.702263	1.07578	1.14226	0.8075	0.735776	1.10629	1.12693	1.13957	1.16079	1.58914	1.0779	1.28228	1.06522	1.1708	0.87775	1.24979	0.748057	1.10809	0.89723	0.935855	0.835361	0.995839	1.16093	0.807558	1.00975	0.70745	0.913118	1.09023	0.993396	1.10766	1.1433	0.854935	1.14234	0.85951	0.884379	1.17604	1.08043	0.898142	0.959172	0.722047	1.00479	0.887204	1.04553
872	chr3	27126399	27702608	0.87285	1.21679	1.06644	1.15108	1.12279	0.738585	1.43768	1.03545	1.01365	0.863225	0.47728	0.762141	0.887812	0.968359	0.783787	1.10756	0.866009	1.1288	0.909911	1.19666	1.01151	0.948852	1.47004	1.08922	1.1817	0.986974	0.980194	1.0111	1.17598	1.02212	0.908483	0.860181	0.714373	1.44557	0.94917	0.646193	0.755806	0.848589	1.10979	0.918303	1.63821	0.988754	0.82047	0.829249	1.20238	1.12947
873	chr3	27702609	28309106	1.14831	1.04158	0.655037	1.08269	0.842706	1.25783	1.19661	1.15271	0.532751	0.81295	0.792869	0.741753	1.08014	1.18016	1.37648	1.45087	1.17501	1.1105	1.16157	0.996953	1.07518	0.805264	1.24222	1.34804	1.08384	1.03165	0.901361	1.30453	1.12623	0.96134	1.03444	0.992168	1.14979	1.36417	1.17229	1.06018	1.42348	1.38258	0.97393	1.008	0.993107	0.828294	1.33481	1.1917	0.970725	1.13467
874	chr3	28309107	28896702	1.12898	1.55807	1.39388	0.788819	0.845511	1.24949	0.774758	0.879687	1.15522	0.987805	1.00671	1.13254	1.41316	1.07715	0.641571	1.02793	0.964157	1.19987	1.20622	1.02497	0.995766	0.981241	0.845169	1.39877	0.932953	1.1291	1.28741	0.953256	0.914846	1.35355	0.837372	0.947579	1.03862	1.1103	1.03387	0.992097	1.32647	0.993124	0.852558	1.00325	0.947846	1.18321	1.03989	0.77911	0.851806	0.875763
875	chr3	28896703	29459724	1.00504	1.36164	1.30891	0.842365	0.823029	1.21758	0.882133	1.45604	1.24729	0.969721	1.49179	1.20224	1.03112	1.09483	0.945931	0.828877	1.02556	0.938872	0.775906	0.865325	0.826014	0.753239	1.44164	0.792838	1.06413	1.14271	0.951247	0.890432	0.94933	1.40337	0.922862	0.736371	1.21608	1.22257	0.67245	0.798563	0.907045	1.03784	0.807014	0.840692	0.763332	0.809459	0.880657	1.21975	1.0355	0.851101
876	chr3	29459725	30048496	0.916243	1.17677	1.57858	0.806736	0.931358	1.02529	0.841707	0.708682	1.06873	1.2388	0.951704	1.2205	0.745247	0.776187	0.972655	0.962098	1.17704	1.13421	1.01484	1.01514	0.954697	0.945232	1.00402	1.04918	0.828259	0.891609	0.944355	0.532402	0.96334	1.00055	0.987262	1.37315	1.13327	1.07511	0.71672	1.44509	0.786601	1.17504	0.923654	1.2977	1.10417	1.40537	0.97981	1.11958	1.29047	1.03702
877	chr3	30048497	30618875	0.860916	1.16212	1.07277	0.800147	0.773479	1.15119	1.07845	1.23882	1.41625	0.836166	0.915735	1.05749	1.01958	1.13821	0.815313	1.06918	1.06639	0.742771	1.03832	1.00767	0.974564	1.08218	0.90665	0.98418	0.824582	1.00316	1.10379	0.658617	0.792686	1.30913	0.869021	1.43912	1.10147	1.02095	0.907729	0.81751	0.910682	1.25289	0.894651	0.935319	1.23851	0.79494	0.907209	0.826622	1.01767	0.902812
878	chr3	30618876	31160569	1.14142	1.11575	0.83308	1.05646	0.730918	1.24609	0.939619	0.673123	0.816266	1.31045	0.678051	0.737509	0.869152	0.832461	1.0414	1.10557	0.716676	1.04961	1.33296	0.890357	1.07318	0.963917	0.880351	1.04874	1.0684	0.949001	0.833783	0.704755	1.40423	0.913991	1.0395	1.35777	1.07176	1.0426	1.30587	0.631522	1.23962	0.768556	1.14328	1.45355	1.05464	1.05772	0.811364	0.972144	1.15683	0.871464
879	chr3	31160570	31715065	0.965898	1.29961	1.22952	1.47628	1.04525	1.49301	0.686428	0.972346	1.05121	0.732944	0.966874	1.07092	1.03919	1.1887	1.00353	1.01123	1.30803	0.812169	1.02262	1.2739	0.807578	0.806645	0.875965	1.26665	0.916643	1.1254	0.859294	1.07523	0.823266	0.868338	0.998833	1.04685	0.970045	0.9519	0.925161	1.12427	1.03289	0.887284	1.17114	0.833311	1.27797	0.878422	0.980077	1.30642	1.13055	1.04266
880	chr3	31715066	32283210	0.91329	1.78828	1.0256	0.762016	0.74302	1.32688	0.609384	0.932573	1.33861	1.27132	0.410255	1.06475	1.15716	1.10306	0.881354	0.825993	0.984537	1.07294	1.0267	0.896534	0.846695	0.919647	0.924466	1.28853	0.904462	1.07305	1.04276	1.27503	1.18468	0.845055	0.85535	0.886938	0.976621	0.505204	1.09473	1.32881	0.846433	1.17463	1.09545	1.06493	1.39909	1.06249	0.952521	1.19802	1.07625	1.03901
881	chr3	32283211	32860997	1.22294	1.12322	1.137	1.03942	0.973497	1.10854	1.02915	1.26304	1.02448	0.917474	0.849832	0.743651	1.45262	0.581698	1.32439	0.659533	0.907488	0.721437	0.870945	1.1491	0.988894	1.11141	0.859231	1.21918	0.96034	0.870278	1.35827	0.753179	1.08968	0.896253	1.0558	0.774871	0.851438	0.969318	0.703781	0.986436	1.32304	0.863287	0.792494	1.02259	0.857965	1.10488	0.814649	0.97076	0.839584	1.06983
882	chr3	32860998	33436127	1.2039	1.34336	0.959586	1.03979	0.980884	1.03427	0.920247	1.09368	1.19263	1.10024	1.20371	0.957681	0.997587	1.07676	1.27412	1.37979	1.93113	0.922941	1.0563	1.54992	1.023	1.30205	1.15131	0.871804	1.16936	0.968614	0.664996	1.05117	0.810656	1.00074	0.759534	1.31123	0.92406	0.441759	0.869082	0.98006	0.966998	1.00899	0.922685	0.958041	1.14389	0.939347	0.760868	1.31127	1.14382	1.05463
883	chr3	33436128	34031680	0.873231	0.669781	0.793388	1.00109	0.842075	1.05363	0.903445	1.08448	1.04399	1.08633	0.742464	1.1812	0.868772	0.853484	1.2236	1.40359	0.801076	1.0834	0.84751	0.826914	1.06468	0.932573	1.28307	1.1415	0.793761	0.918898	0.961178	0.994656	0.858659	1.04425	1.07273	1.09124	0.92504	1.04165	1.27183	1.85001	1.06604	1.00854	1.12995	0.701094	1.08629	0.970925	1.1103	0.929547	1.44517	1.05425
884	chr3	34031681	34615225	0.830342	1.3494	1.37075	1.091	1.0512	0.781751	0.720684	1.0601	0.827438	1.27584	1.02446	0.946936	1.22619	0.838418	1.28612	0.970784	1.11125	1.10621	1.1457	1.02719	0.991186	1.15818	1.13396	1.39571	0.791353	0.978024	1.17174	1.12611	0.791774	1.05334	1.32412	1.11524	1.17573	0.962806	1.40789	1.09796	0.951839	1.08455	1.25552	0.732381	1.00378	1.11693	1.19808	0.972909	0.948392	0.922432
885	chr3	34615226	35261961	0.792067	1.59289	1.48621	1.2343	1.34869	0.999609	1.00662	1.30378	1.17007	1.11992	0.729337	0.982378	1.11916	1.04755	1.49481	1.39599	1.30082	1.5003	1.19785	1.30741	1.02038	0.460516	0.528585	1.09786	0.690888	1.02614	0.977496	1.15203	1.58891	0.686573	0.984618	0.821865	0.834689	1.16888	0.688017	1.04811	0.761664	1.26151	0.979628	1.17057	1.11177	1.09495	0.700196	0.866314	0.916877	1.03951
886	chr3	35261962	35898526	0.888141	1.47628	1.21015	0.958083	0.801439	0.898064	0.790245	1.00106	1.28445	0.621979	0.707585	0.647684	0.809087	1.0688	1.09288	0.965959	1.01711	1.38067	1.19752	0.828893	0.903098	1.23249	0.897148	1.00718	0.89466	0.970458	1.12381	1.17892	0.899076	0.719687	0.979059	0.897004	1.03632	0.967469	1.14112	0.873695	0.927703	1.42603	1.20466	0.846091	1.08759	0.826384	1.07076	1.04854	0.832892	0.777439
887	chr3	35898527	36503142	0.987282	1.16316	0.81422	0.853165	1.07381	1.0727	0.9744	0.983922	1.20278	0.836093	1.06834	1.05798	0.724009	1.01787	1.24432	0.779966	1.57883	1.38881	1.1824	0.892245	1.0587	1.2365	1.01465	1.2153	1.22112	1.13214	0.507197	0.968143	0.976836	0.900828	1.00349	1.12655	1.10142	0.756508	0.672248	0.623184	0.77656	1.23259	0.994072	0.935173	1.29764	1.05024	0.742699	0.927202	1.19702	0.881376
888	chr3	36503143	37064668	0.807299	1.33188	1.37849	1.40949	1.64906	1.23545	1.05495	0.733566	0.969897	0.758454	1.05588	1.16905	1.07483	1.15175	1.04191	1.15458	1.33379	1.06123	0.888358	1.0869	0.99386	1.71195	1.09659	1.18554	0.780205	1.055	0.842324	0.576693	0.728579	0.855249	1.21673	1.08185	1.01323	0.685204	1.00583	1.64608	1.19552	1.1997	1.15847	1.12974	0.727249	1.24079	1.07753	0.851652	1.00859	1.25139
889	chr3	37064669	37616422	0.919406	1.06545	1.17551	0.873881	0.975641	1.21317	0.597811	1.42831	0.969851	0.65963	1.02277	0.953613	1.00066	1.50754	1.37371	1.27318	0.860326	0.995052	0.857779	0.863064	0.914799	0.982727	1.32382	1.37252	1.62266	0.960807	0.904544	1.28711	1.2209	0.720297	0.856073	0.878767	0.970055	0.776507	0.790469	1.34322	0.836848	1.25281	1.15857	0.860914	0.885356	1.18164	1.29313	1.00069	1.05066	0.889211
890	chr3	37616423	38137754	1.09233	1.03508	0.989553	0.904135	1.07326	0.893714	0.932283	0.926935	0.923217	1.24577	1.19917	1.36557	1.05081	0.951866	1.28314	1.28209	0.714564	0.828119	0.741787	1.34429	0.940734	0.808764	0.958329	0.984994	0.638306	0.896422	0.905206	1.20159	0.750231	1.06923	0.945661	1.05016	0.824606	1.27478	0.881954	1.34759	1.12105	1.37075	1.02208	0.935971	1.40008	0.933123	0.735204	1.22394	1.13319	0.673235
891	chr3	38137755	38666093	1.19721	0.823177	0.908316	0.619111	1.0601	1.07949	1.13454	0.741132	1.06439	0.894973	0.700454	1.02361	0.65401	1.08651	1.21306	0.851286	1.6069	0.85911	1.65077	0.782085	0.836427	0.780188	1.36333	0.916179	1.09602	1.07494	1.13416	1.2288	1.06127	1.06746	1.01085	0.904938	1.04833	0.525088	0.855328	1.10908	1.21969	1.28633	1.09872	0.732288	0.855566	1.19657	1.0146	1.04694	0.815634	0.973474
892	chr3	38666094	39209937	0.919118	1.09353	1.11543	1.1504	1.12574	0.878919	1.25902	1.08325	0.696533	1.17679	0.903189	1.47286	1.06508	1.11126	0.927339	1.09772	1.53923	0.983835	1.11985	1.14098	0.874954	0.995527	1.66599	1.05239	0.761856	0.956455	1.14728	0.883052	1.12673	0.754447	1.14412	0.884227	1.06764	0.879415	0.628198	0.932631	1.36973	1.15211	1.33524	0.876812	1.27923	0.860374	1.05304	0.753768	0.851931	0.968096
893	chr3	39209938	39808083	1.38519	1.07417	0.872487	1.12664	1.4968	1.16284	0.860898	1.37509	0.743639	0.852875	0.891154	1.38076	1.2903	1.01951	1.09829	1.26019	1.44881	0.875381	0.891523	1.09137	0.913455	0.74575	1.28342	1.04848	1.09999	1.17523	0.928677	0.871938	0.996124	0.751976	1.06448	1.05657	1.11303	1.32676	0.925971	1.4571	0.658247	1.12541	0.977965	0.866798	0.967293	0.975835	1.00688	0.991413	0.985669	1.14395
894	chr3	39808084	40389384	1.34619	1.35466	1.41573	1.03361	0.928352	1.5272	1.2116	0.831374	1.19017	1.33871	1.07286	1.0668	1.26759	1.36163	0.774628	1.01908	1.03808	1.06653	1.0471	0.859941	1.05634	1.1289	1.01837	0.658575	0.860422	0.908884	0.858954	0.943223	0.962827	1.01905	1.15048	1.05811	0.898342	0.838291	0.873132	1.03009	0.925057	0.971196	1.03769	0.976598	1.35996	0.90897	0.915286	0.890927	0.885062	1.13549
895	chr3	40389385	40927082	0.759555	1.12105	0.664523	0.750996	0.958891	1.09446	0.653909	1.26048	1.30058	0.885591	0.924187	1.14068	1.43324	1.18918	0.859541	1.11366	1.10771	1.51546	0.922126	0.898559	1.06437	0.8426	1.08886	1.07907	1.10019	1.21336	0.736452	1.52581	1.07561	1.76852	1.13093	1.12439	0.894628	1.32649	0.59218	0.971335	1.04709	0.911109	0.962579	1.24592	1.12323	0.916758	1.13252	0.818972	1.34204	0.934861
896	chr3	40927083	41473589	1.09945	0.844762	1.30603	0.902141	1.20265	0.760449	0.984252	1.04698	1.38748	1.05032	1.35731	1.32624	0.816324	1.11438	1.03565	1.38554	1.03918	1.18862	0.947867	1.02501	1.13108	0.730391	1.16339	0.908772	1.28349	1.27448	1.00393	0.786919	1.06231	0.986798	0.849115	0.71565	0.863801	1.28181	0.820922	0.902341	1.07643	1.31297	1.08047	0.909622	1.16955	1.2725	1.19802	1.00074	0.965208	1.05157
897	chr3	41473590	42083973	0.75654	1.10833	1.46097	1.18692	1.17489	1.35487	0.904385	1.07389	1.33026	1.06744	1.44023	1.1012	1.08918	1.20985	0.88922	0.771838	0.854837	1.31243	1.08539	0.791856	1.11982	1.04162	0.677117	1.33814	0.981006	1.1197	1.02496	0.977114	0.742485	0.731526	1.02284	1.3572	1.11329	1.14027	0.935722	1.55784	1.16034	0.84262	0.688481	1.03643	1.16643	1.04947	1.00291	0.757615	0.900306	1.17695
898	chr3	42083974	42606346	1.35746	0.893753	0.994533	0.946551	0.964141	1.05735	0.723004	0.952885	1.03303	1.17036	0.835179	1.0255	0.756023	1.33905	1.13649	0.726041	0.887738	1.05206	1.0388	1.0861	0.961227	1.01328	1.1123	1.32993	0.862142	0.98307	1.12557	1.78103	0.881723	1.01622	1.23748	1.04706	0.73204	0.866355	1.58269	1.42915	1.17593	1.26281	1.07748	1.19627	1.38118	1.04151	1.16435	1.124	1.14936	0.95507
899	chr3	42606347	43163349	0.861193	1.28671	1.27063	1.12094	0.887947	0.845	0.65338	1.36019	1.11345	1.17035	1.47081	0.957871	0.421907	1.08841	0.893419	0.941688	0.936458	0.990425	1.17289	1.09928	1.07009	1.11857	1.08091	1.13777	1.09815	1.23033	0.799541	1.04737	1.41942	1.35797	0.96179	0.940725	1.02506	0.956059	1.09902	0.970045	1.08945	1.14728	0.726505	0.841127	1.08579	1.04605	0.979874	1.37418	0.857324	0.878593
900	chr3	43163350	43694244	1.1482	0.980755	0.869419	0.931405	1.14626	1.17244	0.91218	0.352683	1.29402	1.53086	1.07281	0.741843	0.782573	0.954379	0.650536	1.28511	0.792864	1.30762	1.33768	0.834146	0.905324	0.992001	1.4018	1.07474	0.818901	1.09086	1.08797	1.31096	1.07953	0.977329	1.08626	0.797109	1.19028	1.10016	1.02209	1.22426	1.13605	0.758411	1.03243	0.740097	0.566543	0.624571	1.25239	0.916725	1.02676	0.93699
901	chr3	43694245	44214139	0.96236	1.07675	0.689613	0.866241	1.10683	1.09934	0.927844	2.09328	1.01222	0.849418	1.00792	1.16434	1.28072	0.876815	0.884067	1.2732	0.619958	0.968251	1.01568	1.11524	0.953399	0.966661	1.04196	1.01131	1.0161	0.978107	1.24316	0.488662	0.916931	1.15941	1.04329	1.13945	0.996298	1.0154	0.844425	0.751831	0.813816	0.693568	1.05659	0.814309	0.772503	1.50241	0.716682	0.870187	0.906772	0.855017
902	chr3	44214140	44782404	1.0463	1.22116	0.900678	0.976426	0.818621	1.095	0.975934	1.41247	0.770561	1.1437	0.528685	0.752399	0.602231	1.01026	1.19437	0.90888	0.676783	1.3262	1.13042	0.762649	0.891742	1.01599	0.813373	0.885932	0.83142	1.0039	0.987474	0.565843	1.12644	0.954867	0.796273	0.874751	0.844731	1.05322	1.04123	1.27666	0.744518	1.02079	0.764628	0.944787	0.80914	0.741386	0.686544	0.602677	0.981346	0.722905
903	chr3	44782405	45298111	1.19039	1.26546	1.08272	1.43363	0.944927	0.916609	1.03451	0.851657	1.20075	0.863752	1.09517	0.685913	1.39672	0.887977	1.43826	1.31116	1.11645	0.893793	0.834729	1.66557	0.987614	0.742888	0.919714	0.91983	1.09453	1.13557	1.43967	1.11997	0.876453	1.40882	0.900156	1.23113	0.646539	0.710422	0.886202	0.927877	0.89757	1.16129	0.956112	0.876967	0.718594	0.991585	0.963345	0.763671	0.813549	1.22596
904	chr3	45298112	45822942	0.946725	1.65105	1.08329	0.944808	0.931022	1.17798	1.50192	1.01746	1.15707	0.876877	1.26981	1.31918	1.02437	1.07213	1.52664	0.555082	0.958373	1.49601	0.847759	1.07945	1.00114	0.735827	0.836751	0.800695	1.38977	0.969793	0.875722	0.938183	1.03071	1.07774	1.07927	0.892988	0.883006	1.0087	1.01858	0.919428	0.889562	1.28732	0.785767	0.828949	1.0065	0.623427	0.893864	0.613315	0.967525	1.07662
905	chr3	45822943	46339854	1.01898	0.948056	0.89099	1.09506	0.946892	1.20237	0.89356	1.25536	0.69748	1.22572	1.1691	1.08446	1.34023	1.24994	0.687518	0.812528	1.22065	1.26805	1.39725	1.42136	1.00472	0.809161	1.13207	0.815788	1.30381	0.929463	1.5596	0.975772	1.12987	1.0349	0.974086	0.6699	1.13416	0.968804	1.6358	1.25484	1.02034	0.836525	1.17388	1.35236	1.48045	0.865084	0.87842	0.90545	0.755359	1.07861
906	chr3	46339855	46889781	1.528	0.635672	1.08624	0.968829	0.718195	0.399251	0.929717	0.980009	1.10896	0.965736	0.843854	0.722172	0.889322	1.10593	0.530565	1.09639	0.66983	1.09165	1.18199	1.34919	0.921613	0.94761	1.0413	1.07636	1.24692	1.16752	1.33725	1.17321	1.1083	0.776905	0.807142	1.15862	0.91442	1.37816	0.890862	0.833624	1.05879	1.29324	1.23009	1.00904	1.14718	1.07966	0.924065	0.927775	1.37216	0.599906
907	chr3	46889782	47446010	1.23632	1.17903	0.748057	0.986408	0.839645	0.756992	1.19205	0.871775	1.6488	1.06253	1.00915	0.840875	0.989791	0.847423	0.884916	1.28565	0.540416	1.14974	0.909822	1.16543	1.00508	1.28845	1.18021	0.885181	1.10659	0.981727	0.907033	1.18375	0.998116	0.794145	1.1092	1.17387	1.14138	0.990596	0.769128	0.860252	0.989486	0.721026	0.930656	0.878403	0.902016	1.49803	0.723912	1.12223	1.11093	1.12584
908	chr3	47446011	48027036	1.18249	1.3003	1.52203	0.959994	1.02813	0.895926	1.35087	0.64011	1.25011	0.970638	1.00933	0.905042	1.12799	1.14645	0.695578	0.701658	1.29544	1.49181	1.03754	1.44394	0.958006	0.971093	1.15394	0.890823	1.45635	0.760227	1.27661	1.15066	0.816114	0.825242	0.918917	0.36338	0.912818	1.32204	1.83212	1.53921	0.9924	0.7236	1.00751	1.16299	1.10332	0.843624	1.01117	0.899285	0.981451	1.30396
909	chr3	48027037	48600397	0.962549	1.27204	1.05798	1.22683	0.867696	1.18522	1.08894	1.16452	0.899798	0.884908	1.08325	1.24568	1.10968	0.688941	0.943579	0.919451	1.03303	0.887148	0.843804	1.23853	0.985813	1.0239	1.17613	1.04918	0.987107	0.931012	0.737013	1.32578	1.02072	0.793525	1.07342	1.17166	0.916874	0.945396	0.684129	1.53186	1.55274	1.16411	0.847482	0.821275	1.03771	1.02972	0.931437	0.835812	0.832355	1.30987
910	chr3	48600398	49149706	1.07194	0.966436	1.19008	0.855939	0.858936	1.16861	1.17539	1.31714	0.843547	1.09929	0.928351	1.2207	1.44274	1.44723	1.05135	1.01968	1.18185	1.18568	1.10897	0.88465	0.914126	1.0931	0.931084	0.601994	1.02823	0.78392	0.854104	0.629383	0.913734	1.12076	0.797617	1.33853	0.992469	1.32521	0.922606	0.989086	1.23858	0.733926	1.01309	0.908161	0.8699	0.996593	1.02766	0.814205	0.73589	1.07864
911	chr3	49149707	49700510	0.815038	1.34842	0.946549	0.667978	1.14929	1.18461	0.932959	1.21325	0.82771	0.693287	1.19225	1.06526	0.93304	0.958795	0.703632	0.554093	1.16126	0.972715	1.18416	1.08201	0.947399	1.09427	1.03949	1.02603	0.859549	0.838885	0.856984	0.807031	0.699521	1.04611	1.06129	0.7622	0.959561	0.774945	0.836567	0.822879	0.947396	1.09011	1.09511	1.06934	0.670787	0.963628	0.905518	0.925949	0.82805	0.875596
912	chr3	49700511	50233179	1.1162	1.4189	1.24693	0.740629	1.17568	1.00689	0.959694	1.2095	0.94087	0.637232	0.607905	0.978727	0.926862	1.15836	0.714259	1.24604	0.920295	1.05937	1.05579	0.818676	0.837996	1.41551	1.12002	0.411665	0.878188	0.817047	0.883324	1.18627	0.755436	1.10997	0.853122	0.976275	0.877389	0.968155	0.778781	1.26424	0.940766	1.02752	1.03822	0.593676	0.992826	0.871283	0.880178	0.911663	0.986326	1.19132
913	chr3	50233180	50727889	0.745858	1.2342	1.33586	1.01461	0.738745	0.737412	1.19925	1.04019	0.884674	1.07154	0.577503	1.07402	1.0087	0.942324	1.20459	1.09934	1.21979	1.30687	1.06235	0.906833	0.888201	1.19961	1.05837	0.815482	0.762519	1.23011	1.03075	1.17544	1.14547	1.54899	0.956858	0.971971	0.712868	0.845999	0.611416	0.773226	0.869541	0.779337	1.33637	0.86366	1.05618	1.0682	0.869419	0.982456	0.946094	1.06447
914	chr3	50727890	51379533	1.29154	1.02227	0.935608	0.81886	0.925664	0.93884	1.3009	1.26636	1.14766	1.25938	0.607398	1.306	1.02116	0.763313	1.44781	1.24287	1.2855	0.906373	0.965909	1.49387	0.980457	1.04241	1.01233	1.12932	1.01344	0.996163	1.08683	1.06122	1.40691	1.50317	1.12251	1.12581	0.92265	0.97299	1.08254	1.12534	1.10305	0.938899	0.970754	0.901942	0.882786	0.874833	1.03012	0.906546	1.06647	1.38594
915	chr3	51379534	51962425	1.26428	0.906811	1.31123	1.1731	1.28941	0.822174	1.10237	1.05945	1.01638	0.759194	1.02572	1.01605	1.1999	1.06215	1.11555	1.40147	1.38434	1.22423	1.05582	0.780653	1.10035	1.21752	1.0408	0.855258	1.36844	1.03083	0.869607	0.810424	1.27998	1.16553	0.889641	1.23106	1.09272	1.18683	1.45543	1.39012	0.994351	0.715476	0.906725	1.25637	1.27693	0.930255	1.22354	0.950304	0.814362	1.2006
916	chr3	51962426	52462523	0.740497	0.806035	0.787712	0.768575	0.88421	1.17442	0.676993	1.09848	1.12543	1.13466	0.837625	0.929205	0.854041	1.25227	1.84815	1.06571	0.831128	1.09813	1.25227	1.32124	1.03316	1.09408	1.24642	1.14353	0.750059	1.11417	0.805768	1.33027	0.804048	0.966019	1.16449	1.10308	0.96153	1.23463	1.17675	1.02225	1.04638	0.608695	0.850816	1.45614	1.37988	0.572187	1.12923	0.952549	1.05852	0.91798
917	chr3	52462524	52995515	1.25626	1.45889	1.23668	1.13834	0.760131	1.03324	1.30233	0.916785	1.00031	1.23808	1.00791	1.11213	0.991838	1.19572	1.00286	1.13547	1.13296	1.15028	1.19924	1.13477	1.05354	1.02363	0.703088	1.01647	1.17658	0.821583	1.16907	1.27841	0.976764	0.495543	0.976591	1.2424	1.34067	0.800008	0.770194	0.959089	1.05902	1.08626	1.14648	1.01891	0.972809	0.779945	1.03575	1.09864	1.15125	0.918486
918	chr3	52995516	53575891	0.804387	1.38987	0.985276	1.07626	0.952663	1.13123	1.03869	1.20058	0.925285	1.24789	1.2627	1.19636	0.973176	1.29758	0.535383	0.915552	1.16138	1.42545	1.26423	1.12769	0.911405	1.10612	0.676772	1.27271	0.940889	0.939827	0.974087	1.15048	1.28879	0.776979	0.919225	1.19824	0.957494	1.4627	1.036	1.21211	0.896313	0.964293	1.05612	1.32866	0.908688	0.904028	0.808417	1.03752	0.874939	1.1257
919	chr3	53575892	54093014	1.17397	1.28207	0.917882	1.31026	1.30859	1.28005	0.834425	1.08209	0.955251	0.974024	1.26124	1.11512	0.700591	1.11473	0.950007	0.909945	1.02686	1.09992	0.877417	1.0375	0.96342	0.847973	0.884722	0.997964	0.705091	1.04294	0.548339	1.1184	1.17388	0.815914	0.974002	0.673107	1.13486	0.787565	1.10625	0.739335	0.88248	0.940528	1.35894	1.2203	1.38987	1.06831	1.71933	1.2024	0.999918	1.05818
920	chr3	54093015	54649019	0.952319	0.984494	1.08849	0.979692	1.17874	0.966747	1.001	1.28115	1.49277	1.55484	1.07484	1.10595	0.70129	0.768694	0.712497	1.10992	1.25093	1.39398	1.20862	0.939288	0.846071	0.978849	1.15594	0.777552	0.873382	1.05904	0.988329	1.23681	0.666166	0.760945	1.13509	0.951119	0.733408	1.28449	0.975756	0.752581	1.2464	1.16745	0.823794	0.92778	1.26802	0.824488	1.03293	1.17022	1.18707	1.27604
921	chr3	54649020	55169569	1.03229	1.29715	0.803017	1.07588	1.19254	1.23011	1.02735	1.75863	0.910098	1.31849	1.02173	0.748425	1.16418	1.05186	1.14525	0.996253	1.33299	1.23047	0.898195	1.49449	1.03939	1.09692	0.976585	1.15428	0.908515	1.00956	1.0306	0.74309	0.804517	0.996204	1.19057	0.93447	0.990784	0.62545	1.15305	1.1075	1.05312	0.988226	0.786133	1.06076	1.12727	0.942948	1.58825	0.992695	0.906654	0.917625
922	chr3	55169570	55699552	1.04808	1.20389	0.917756	0.95322	1.0046	0.989301	0.749503	1.0536	1.10025	0.867087	1.10323	1.07744	0.554234	1.03413	0.932092	1.23322	0.986849	0.790904	0.932109	0.774878	0.89875	1.10665	0.959295	0.902029	1.19916	0.904229	0.791477	0.744359	1.054	1.18335	1.03156	0.77981	1.24624	1.28098	1.24724	0.802041	1.51062	0.865222	1.01673	1.04027	1.20754	1.20341	0.760915	0.961876	0.93581	0.998618
923	chr3	55699553	56231169	1.02301	1.01783	0.93185	0.848291	1.10769	1.20264	1.01369	0.996798	1.10031	0.971308	1.02499	1.43131	1.29797	1.38067	1.26548	1.3091	0.853317	1.17986	0.873623	1.26388	1.10283	1.1357	0.603279	0.97072	0.89015	1.09	1.34716	1.27523	1.27677	1.42105	0.867398	1.15834	0.983292	1.392	1.14952	0.649005	1.07282	0.894092	1.06427	0.931303	1.13484	1.45728	1.13146	0.882776	0.943009	1.27595
924	chr3	56231170	56819544	1.05157	0.994184	1.06716	0.906734	1.16298	1.28714	1.04464	1.20798	1.17725	0.75961	0.864602	1.14119	1.65761	1.47919	0.843169	1.12954	1.56274	0.789502	1.13392	1.05062	1.01245	0.955545	1.22594	1.12802	0.803467	0.95614	1.43814	1.31508	1.0239	1.51031	0.971532	1.14254	0.942588	1.46083	1.38326	0.763202	0.968103	0.645909	0.739634	1.10585	1.14946	1.25352	1.02964	0.963801	1.35366	1.10923
925	chr3	56819545	57384562	0.981567	0.872864	1.1899	0.967025	1.03042	1.14696	0.84633	1.58148	0.969106	0.936796	0.888607	1.09496	1.00774	0.890781	1.17551	1.17998	0.6709	1.03913	0.995592	1.02897	0.973969	0.886685	0.924388	1.53367	0.904363	0.974805	1.01112	1.0111	0.857826	0.844865	1.07195	1.27725	1.19346	1.28533	1.13344	1.24039	1.2998	0.910247	0.829458	0.955762	1.04091	1.18043	0.921704	0.887337	1.18154	0.913242
926	chr3	57384563	57983851	0.914753	1.15136	1.26618	0.881386	0.950637	0.947017	0.904832	1.56751	1.38818	0.971304	1.112	0.929196	0.754087	0.987847	0.611418	0.706003	0.848575	1.21677	1.08403	1.25153	0.915765	0.953819	0.855746	1.5866	1.05967	0.790987	0.872922	1.03122	0.962015	0.836838	1.06981	1.19041	1.36397	1.37878	1.11745	1.02806	1.03666	0.964172	1.1359	1.06532	0.857721	0.808484	0.975566	0.795749	1.14957	1.04392
927	chr3	57983852	58497711	0.942188	1.16679	1.02463	0.902759	0.829832	0.947375	0.800433	0.956873	0.700524	0.936574	0.928688	1.06259	1.00244	1.08419	1.16927	1.03291	0.893793	1.06135	0.715048	0.734413	0.98187	0.927437	1.26656	0.762849	0.876489	1.0101	1.34635	0.975371	0.729027	0.725238	0.868559	0.952796	0.822344	1.28435	1.34763	0.937998	1.15316	1.21305	0.927584	1.1398	1.13477	1.14289	0.645007	0.969622	1.17098	1.14305
928	chr3	58497712	59041179	0.958275	1.53972	0.757852	0.810539	0.812871	1.04162	1.33278	1.36418	1.28091	0.75853	1.33063	0.807582	1.2083	1.00812	0.995525	1.05256	0.732587	0.798211	1.02199	1.26586	1.02066	0.989142	0.58264	1.00913	0.755671	0.943526	0.83432	1.23126	1.22824	0.898804	1.16796	1.18521	1.54956	1.24649	1.29141	1.06191	0.635378	1.01564	0.943018	0.844039	1.0073	0.972532	1.12029	1.07976	0.922715	0.878036
929	chr3	59041180	59607994	1.09076	0.843515	0.934617	1.21462	0.790466	1.17947	1.0123	0.882396	1.19315	1.00622	0.895574	1.36702	1.33675	1.12429	1.26217	1.1261	0.770427	1.14262	1.2671	0.793374	0.789741	0.978903	1.01383	0.85324	1.16108	1.02114	0.703876	0.976675	1.10338	1.23192	1.08933	1.22499	1.00747	0.760891	0.756878	1.16851	0.696458	0.791728	0.852101	1.08851	0.725117	0.903868	1.09452	1.11648	1.12984	0.989959
930	chr3	59607995	60132560	0.87787	1.41292	0.590402	1.39276	0.862068	0.814826	0.900963	1.02577	0.945444	1.05835	1.56666	1.09897	0.835443	1.38467	1.41935	1.10541	1.33532	0.837501	0.953901	0.98727	0.919078	0.825251	1.01569	1.44145	0.799743	0.883799	0.76412	1.49783	1.02355	1.19681	1.16578	1.02651	1.0112	0.846274	1.19064	1.28368	1.42011	1.07767	0.910367	1.19215	1.33023	0.966638	0.765711	1.25718	0.97263	1.28966
931	chr3	60132561	60705843	0.787333	0.966345	1.05662	1.03634	1.11841	1.31986	0.823843	1.02679	1.04812	1.07899	0.952249	0.917208	1.42644	1.12956	0.527092	0.952512	1.22945	0.837566	0.602199	0.725512	1.03272	1.35957	1.09166	1.09723	1.02332	1.01117	1.24838	0.692723	0.968134	0.743657	0.910178	1.0963	1.25995	1.03582	0.81934	1.0493	1.16995	1.71076	1.07552	1.16833	1.15368	0.820669	1.3092	0.870262	1.27517	1.15462
932	chr3	60705844	61292345	1.15034	1.29004	1.53614	1.26157	0.832805	1.08807	0.970138	0.828759	1.24918	0.764621	0.806289	0.956875	1.05753	1.09206	1.10678	1.26111	0.667248	1.24465	1.34209	1.57352	1.13097	1.21656	0.710696	1.43787	0.696582	1.02562	1.1255	1.00151	0.97868	1.30197	0.920506	0.910282	0.975886	1.70178	0.661757	1.48378	1.38802	0.829206	1.138	0.795057	1.10248	1.11308	0.742288	0.990775	0.974494	1.24284
933	chr3	61292346	61857481	0.864248	1.37589	0.697756	0.652337	1.01605	1.16896	1.04701	0.587825	0.724439	0.961873	0.960967	0.999889	1.53967	0.759035	1.45183	1.55527	1.02246	1.1484	1.17825	0.789079	0.967446	1.27073	1.40961	1.03248	0.875932	1.01135	1.22166	0.598219	0.922723	1.14857	1.18877	0.924339	1.22122	1.21371	0.965652	1.32117	0.980664	0.995028	0.943174	1.11555	1.08236	1.01577	0.915139	0.857638	0.889119	1.03371
934	chr3	61857482	62411970	0.904069	1.12921	1.1427	1.13794	1.10043	1.41298	0.763335	0.841436	0.915019	0.743385	1.08241	1.69795	0.947917	0.756711	0.87519	1.71431	0.899883	1.04521	1.16805	1.40116	1.11177	1.10279	1.01233	1.26632	1.01631	1.0872	0.669273	1.40897	0.838211	1.02008	1.28268	1.13268	1.40509	0.94208	0.983839	1.16673	1.04671	1.01058	1.02345	0.654783	0.805222	0.936156	1.0157	0.907495	1.44392	1.17094
935	chr3	62411971	62937024	1.35369	1.15787	1.30157	1.1066	1.0743	0.831347	0.927482	1.40272	0.6827	0.992038	0.621796	0.806002	0.675844	0.896824	0.937324	0.832068	1.58159	0.766917	0.632456	0.849147	0.765541	1.17253	0.873982	1.27017	0.813908	0.873559	1.0249	1.45685	0.876767	0.741844	1.03479	1.62689	0.927559	1.20396	0.978887	0.781211	0.82154	1.06962	1.07231	1.02389	0.784576	1.04989	0.535884	0.637641	0.802775	1.08975
936	chr3	62937025	63524511	1.08313	0.712863	1.21871	1.20395	1.02975	0.983725	1.14793	1.32093	1.16049	1.71606	1.32054	0.928369	0.847166	1.00833	0.97268	0.719578	1.0819	0.805789	0.730248	1.2881	0.968059	0.904178	1.2743	1.19177	0.998029	1.04346	1.18542	1.25217	1.38011	1.60234	1.03881	1.1433	1.14086	1.02164	0.697572	1.60348	1.06781	1.76927	1.06481	0.973509	1.04084	1.26077	1.39233	1.09362	1.03468	1.08044
937	chr3	63524512	64072054	1.10902	0.80503	1.30561	1.30658	1.21683	1.31228	0.920882	0.942149	0.544652	0.938263	0.957443	1.19278	0.931713	1.02669	1.26381	1.15621	0.728349	1.12664	1.02455	1.25795	0.870381	1.04832	0.875303	1.08953	0.790474	0.942502	1.47062	0.859583	1.06663	1.20895	0.934688	1.16475	1.27973	1.64945	0.692714	0.999691	1.32776	0.919385	1.06791	1.14715	0.783076	1.02119	1.19663	0.662838	1.16521	0.933343
938	chr3	64072055	64571001	1.0705	0.508949	1.01969	1.22888	1.09811	0.932255	1.05539	1.41556	0.956323	0.983479	0.82528	1.5733	0.931835	0.924176	0.858908	1.11779	1.31564	1.04809	1.34566	0.827202	0.835674	1.39602	1.1177	1.10497	0.679458	1.12122	1.01277	1.22801	0.809624	1.09617	1.17696	1.34557	0.908311	1.50724	0.89876	1.31701	1.22207	1.04463	0.804087	1.29576	1.03133	0.888506	0.933249	1.00875	0.794943	0.9319
939	chr3	64571002	65098863	1.38616	0.765913	1.35938	0.843375	0.899509	0.999656	1.18561	0.846735	1.24455	1.31051	1.14384	1.34585	1.06886	1.20186	1.20088	0.814717	0.955474	1.22591	1.27562	1.00368	0.882759	0.634341	0.736832	1.0579	0.786068	1.1054	1.10689	1.52154	0.679528	0.937818	0.854201	0.895436	0.825061	0.981817	1.06127	1.21324	0.669988	0.948176	1.00395	0.788294	1.26172	0.759442	0.916719	0.787492	1.01786	1.07794
940	chr3	65098864	65654069	1.15506	0.530178	0.930123	0.934535	1.11078	1.13823	1.19295	1.34494	0.731972	0.721162	0.515113	0.777718	0.701673	1.06426	0.939503	1.01484	0.978961	0.944558	1.11317	0.817758	1.00816	1.07259	1.32624	0.8456	0.979113	0.889774	0.996234	1.406	1.0115	0.922383	0.845558	0.996796	1.51028	0.633741	0.896979	1.21187	0.92915	1.07176	0.930459	0.95746	0.976346	1.10729	1.13698	0.60958	0.861595	1.16401
941	chr3	65654070	66283623	0.852163	1.06555	1.54098	0.873885	1.20761	1.28021	1.19559	1.00396	1.33944	1.05509	0.82499	1.0153	1.11193	0.963401	1.37317	1.42084	1.29102	1.09425	1.10273	0.895145	0.853057	0.697495	0.680489	1.06088	0.936333	1.00475	0.967275	0.665122	0.787631	0.990183	1.09297	1.25119	0.883925	0.913665	0.790143	0.996067	1.19553	0.853253	1.15838	0.995086	0.822099	1.24085	0.861965	0.617448	1.05057	0.900066
942	chr3	66283624	66822907	0.870588	0.982291	0.538333	1.38489	0.888757	1.27707	0.684968	0.954762	1.34004	1.11426	0.792354	1.11117	1.07216	0.805463	1.09843	0.967157	1.02091	1.01246	1.19722	0.672517	0.790332	0.613111	0.854883	1.01538	0.979456	1.05463	1.02362	0.827924	1.19316	0.704555	0.709179	1.22336	1.11114	0.706227	0.919392	0.794278	0.866749	1.01887	0.979293	1.08264	1.15373	0.946905	1.28771	1.01271	1.1313	0.912062
943	chr3	66822908	67412137	1.15391	0.618936	0.952468	0.968673	1.09704	1.28926	0.940218	1.23403	1.06879	0.933195	0.972688	1.27317	1.33242	1.36691	1.02358	0.936219	0.841322	1.35586	1.07801	1.07718	1.03722	0.781363	1.33606	1.13705	1.34007	0.924195	1.07685	1.12569	0.963781	1.26921	0.923368	1.15814	0.917186	1.14616	0.831244	1.1227	0.845207	0.915674	1.09951	1.03037	1.16547	1.05042	0.710275	0.914859	1.3581	1.26132
944	chr3	67412138	68009767	0.819029	1.42171	1.10456	0.90672	1.16181	1.23505	0.647603	0.75229	1.07033	1.30889	1.09774	0.753581	1.30288	0.990067	1.10796	1.05216	1.08619	1.24658	1.13081	1.38659	1.02825	1.0298	1.26974	1.01049	0.818658	0.95376	1.06436	1.62716	1.17164	0.999886	1.20283	1.5541	0.914325	0.765455	1.14806	1.48934	1.24542	1.45018	0.908313	1.05246	1.34789	0.790248	1.02033	0.760317	1.59901	1.00839
945	chr3	68009768	68606505	0.995268	1.43778	0.949141	1.07765	1.28744	1.25347	0.979444	1.1034	1.15802	1.33959	1.11163	0.95942	1.26135	1.11612	1.29986	1.36404	1.03544	1.26782	1.45329	1.10082	1.07302	1.27858	1.03604	1.24333	0.929012	0.928299	1.21766	1.56655	0.828825	1.07532	1.03683	0.993413	1.59275	1.34816	1.20397	1.36029	1.03721	1.30037	1.24102	1.02359	0.856812	0.858476	1.15715	1.14813	0.995921	1.24762
946	chr3	68606506	69201479	1.29733	0.99186	1.5644	1.06768	0.988901	1.23831	1.07767	0.961387	1.01415	0.831675	0.857977	1.1994	0.961628	1.39067	1.15355	0.930827	0.738165	0.894547	1.15403	0.809856	1.00352	1.20455	0.956488	0.965438	0.938394	1.0435	0.885039	1.43547	1.11478	1.06942	0.997981	1.06063	0.998482	1.0238	1.17102	1.34118	1.10649	1.18955	0.944987	1.10269	1.41899	0.962826	1.1888	1.23465	0.809445	1.06605
947	chr3	69201480	69772206	0.730632	0.753243	0.94089	0.994551	1.01888	1.01341	1.35837	0.940532	1.16797	0.968606	0.761878	0.902048	1.39356	0.92562	1.40925	0.676148	1.4722	1.11718	0.934297	0.878242	1.04638	0.984286	1.04087	0.934923	0.904853	0.810259	1.1028	1.28702	1.07988	0.837536	1.04891	1.02222	0.939057	1.07077	0.791273	1.11213	1.33419	1.01911	0.73486	0.745094	0.860039	0.68833	1.06711	0.859518	1.04139	1.25071
948	chr3	69772207	70329331	1.45522	0.916578	1.12744	1.38054	0.913665	1.0474	0.888705	0.58474	0.450721	0.916637	1.07739	1.28053	1.03761	1.20759	1.08544	0.77611	1.42518	1.39055	0.779539	1.32035	1.08044	0.815869	0.79273	0.88989	0.874438	0.909697	0.685329	1.29514	1.16151	1.44396	1.11512	0.664058	0.958169	0.902501	0.919118	1.0398	1.19265	0.891914	0.955607	1.16278	1.24462	0.928105	0.74398	0.598351	1.23162	0.880705
949	chr3	70329332	70939063	1.27227	0.616586	1.16109	1.21502	1.44485	0.993685	1.08747	1.24386	0.790993	0.772518	0.640753	1.32344	0.868506	0.945884	1.41292	0.917196	1.04921	1.32783	1.09283	0.685739	1.07863	0.83011	1.27966	1.46232	1.02802	0.854889	1.16631	1.11139	1.1738	0.962594	1.13744	1.00768	1.0799	0.724564	0.702157	0.788845	1.01119	1.05274	0.994462	0.833521	1.06482	0.9602	1.25588	1.20214	1.05234	1.2023
950	chr3	70939064	71470803	1.02555	0.670615	1.06628	0.991859	1.206	1.07281	1.07842	1.00805	1.03065	1.37904	1.02705	1.10872	1.02853	1.32937	1.30565	1.07255	0.932839	1.05897	1.07349	0.95517	0.93267	0.953941	1.15452	1.64137	0.864473	0.950332	1.05385	0.679932	0.712097	0.932444	0.945671	1.17441	1.06566	0.745821	1.27362	1.64584	0.877968	0.873136	0.79619	1.07034	0.900169	0.846207	1.21237	1.20225	0.87814	1.08621
951	chr3	71470804	71999770	1.03877	0.658765	0.963926	0.921385	1.03672	1.05665	0.797014	1.19674	1.03164	0.990057	0.706353	0.866489	1.03315	1.11422	0.893829	0.729066	1.16652	1.23065	0.990924	0.61598	0.87879	1.11018	1.31169	0.746441	1.47774	0.941737	0.926504	1.06291	1.35087	1.55886	1.02199	1.09	0.907031	1.01956	0.748998	1.23714	0.852773	1.10627	1.25662	0.872366	0.855291	0.766333	0.485814	0.799722	1.10424	0.883631
952	chr3	71999771	72492845	1.19143	0.797285	0.995021	1.38976	0.840288	1.03372	1.13598	0.786649	1.12521	1.17036	1.12749	1.0253	0.871049	0.942908	1.44963	1.08964	0.888265	1.24999	1.07124	0.842153	0.905908	0.946156	1.35199	1.108	1.29166	0.950161	1.09335	1.09562	0.777662	0.774481	0.872967	1.22792	1.02101	0.913685	0.771353	0.968376	0.859008	0.998911	1.15846	0.978513	1.18395	0.863445	1.13343	0.912623	1.06517	1.0024
953	chr3	72492846	73062120	1.04236	0.976104	0.779903	0.856779	0.905538	1.15598	0.920324	1.32634	0.922316	1.182	1.40257	1.28317	0.733042	0.903124	1.3768	0.925839	1.04352	1.52659	0.968296	0.951776	0.954453	1.53491	1.17827	1.44045	0.815202	1.02167	0.68224	0.803717	0.986682	1.03349	1.13305	1.07306	0.73148	1.32928	1.09293	0.696934	1.49373	1.21843	1.17077	0.935063	1.34922	0.859997	0.892976	0.976789	1.26977	1.15528
954	chr3	73062121	73610569	1.02406	0.75213	1.35229	1.60924	0.912248	1.04961	1.38001	0.954242	1.58769	0.882228	1.32174	0.812175	1.20406	1.05294	0.955564	0.908641	0.803748	1.08815	0.977858	0.858293	0.989814	1.08056	0.930081	1.22206	1.0156	0.870658	1.27507	0.826597	0.869898	0.868147	1.14997	0.908935	1.17016	0.74573	1.04259	1.40921	1.01269	1.18209	1.2177	0.917933	0.871212	0.919289	0.874312	1.24874	1.16933	1.04067
955	chr3	73610570	74161855	0.979361	1.06452	0.79367	0.970303	0.902587	1.19034	0.867751	0.972204	0.582638	0.963163	0.679915	1.2236	1.43322	0.788397	0.58211	1.0832	1.01044	0.982682	1.28619	1.0152	1.08926	0.967149	0.7761	1.26168	0.975437	1.00627	0.908216	1.28986	1.2001	1.17946	0.969326	1.55154	0.794416	0.759321	1.32485	1.24131	1.30658	0.794394	0.934468	1.18817	1.04697	1.24559	0.948138	1.20996	1.01977	1.06657
956	chr3	74161856	74730480	0.861009	0.58238	1.53285	0.858939	1.19876	1.17568	1.06244	1.40088	1.02532	0.905676	0.576126	1.15814	0.632783	1.10644	1.02931	1.05812	0.587942	1.16525	0.880016	0.725618	0.737616	1.02624	1.11378	1.39777	0.885552	0.915383	1.40683	1.49416	1.14657	0.483831	0.923356	0.898703	0.969004	0.626215	0.769812	1.43177	1.02594	0.878246	0.975054	0.739624	0.801721	1.19596	0.863367	1.08009	1.2346	1.07807
957	chr3	74730481	75336686	1.23222	0.949247	0.596986	1.09898	0.69503	0.940354	1.16708	0.842019	0.827682	1.0972	1.15366	1.0373	0.862696	1.01247	1.28964	1.00122	0.830013	1.24479	0.77054	0.84228	0.959515	0.811266	0.944084	1.05066	1.22255	0.995823	0.89388	0.88841	1.28474	1.13089	0.944565	1.16476	0.859427	0.43467	1.10886	1.11643	1.26459	0.902777	1.14586	1.0146	1.03222	1.06665	1.17585	0.950439	1.13662	0.813588
958	chr3	75336687	75940031	1.13722	1.19928	1.08432	1.19809	1.18837	1.03994	1.22877	0.778235	1.10492	1.08151	1.07334	0.976797	1.03424	1.03131	1.1799	1.04706	1.0876	1.09278	1.43172	0.989304	1.13345	1.16604	1.44601	1.31073	1.2105	1.12675	1.62765	1.16015	1.18929	1.0823	1.15439	1.14511	1.33424	1.42269	1.20756	0.915587	1.11116	0.963823	1.02001	1.203	0.817135	1.27179	1.32562	0.975067	1.0767	1.09519
959	chr3	75940032	76555927	0.620172	1.13764	1.07857	1.22151	1.10386	1.07955	0.713988	1.5829	0.978224	0.91976	0.675619	1.13174	0.853043	1.39727	0.94771	0.908722	1.06863	1.02547	1.09604	1.00803	0.993678	0.958948	1.25694	0.84889	1.09253	0.955502	1.45958	0.903045	1.04442	0.582669	1.03844	0.890241	1.17573	1.09442	0.898515	0.991416	1.14663	1.45267	1.12297	1.1172	1.17015	1.33041	0.855046	0.961165	1.26706	1.25064
[truncated: 4,041 more rows]
[truncated: 230 more columns]
